# Supplementary material for: Compound 331 selectively induces glioma cell death by upregulating miR-494 and downregulating CDC20
Source: PubMed Central journal article supplement (PMC4495416; doi:10.1038/srep12003), 2015-07-08
Supplement: srep12003-s1.pdf [file srep12003-s1.pdf]

**Compound 331 selectively induces glioma cell death by upregulating miR-494 and downregulating CDC20**

Lei Zhang<sup>1</sup>, Tianhui Niu<sup>2,4</sup>, Yafei Huang<sup>3</sup>, Haichuan Zhu<sup>2</sup>,

Wu Zhong<sup>3\*</sup>, Jian Lin<sup>2\*</sup>, Yan Zhang<sup>1\*</sup>

<sup>1</sup>State Key Laboratory of Biomembrane and Membrane Biotechnology, College of Life Sciences, PKU-IDG/McGovern Institute for Brain Research, Peking University, Beijing, 100871, China

<sup>2</sup>Synthetic and Functional Biomolecules Center, College of Chemistry and Molecular Engineering, Peking University, Beijing, China

<sup>3</sup>Laboratory of Computer-Aided Drug Design & Discovery, Beijing Institute of Pharmacology and Toxicology, Beijing, China

<sup>4</sup>Aviation Medicine Research Laboratory, The General Hospital of the Air Force, Beijing, China

\*Corresponding author: Yan Zhang, Ph.D. (yanzhang@pku.edu.cn), Wu Zhong, Ph.D. ([zhongwu@bmi.ac.cn](mailto:zhongwu@bmi.ac.cn)) and Jian Lin, Ph.D. (linjian@pku.edu.cn)

## Figure Legends

**Fig. S1. List of results from Ingenuity Software Analysis (IPA).** The RNA-seq data were arranged by signaling pathways in order of statistical significance.

**Fig. S2. High dosage of 331 could also induce cell death in astrocytes.** The astrocytes and C6 glioma cells were treated with 5  $\mu$ M, 10  $\mu$ M, 20  $\mu$ M, 30  $\mu$ M compound 331 for 24 h. 30  $\mu$ M of compound 331 induced significant cell death in astrocytes and C6 glioma cells. Data represents the mean  $\pm$  S.E.M. of three independent experiments. \* $p$ <0.05, \*\* $p$ <0.01 compared with control.

**Table S1. The RNA-seq report of U251 cells.**

**Table S2. The RNA-seq report of C6 cells.**

Supplementary Figure 1

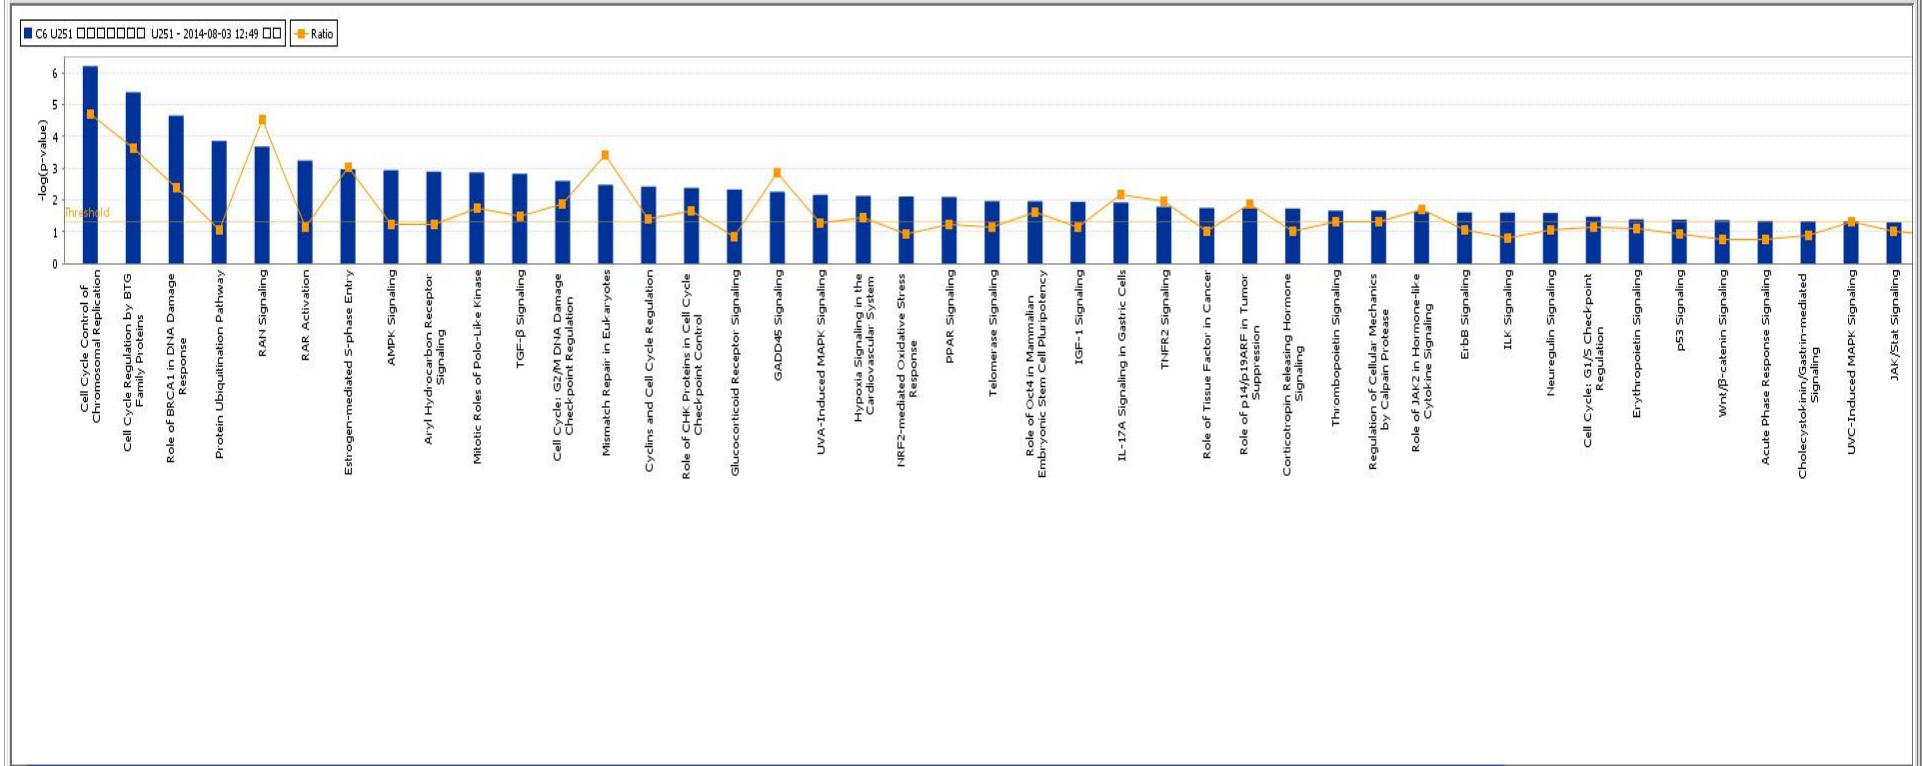

Supplementary Figure 2

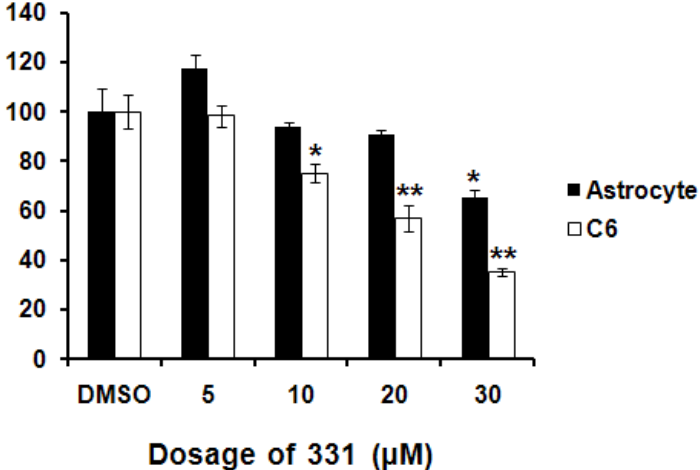

Supplementary Table1

| GeneID  | Gene_length | U251-DMSO-Expression | U251-331-Expression | U251-DMSO-RPKM | U251-331-RPKM | log2 Ratio(U251-3-3/U251-DMSO) | Up-Down-Regulation<br>(331/DMSO) | P-value  | FDR      |
|---------|-------------|----------------------|---------------------|----------------|---------------|--------------------------------|----------------------------------|----------|----------|
| HBA1    | 576         | 0                    | 65                  | 0.001          | 3.316064      | 11.69526                       | Up                               | 0        | 0        |
| HBA2    | 622         | 0                    | 49                  | 0.001          | 2.345238      | 11.19552                       | Up                               | 1.78E-15 | 6.79E-15 |
| PRTN3   | 1001        | 0                    | 54                  | 0.001          | 1.601751      | 10.64543                       | Up                               | 0        | 0        |
| BARX1   | 1498        | 0                    | 41                  | 0.001          | 0.807861      | 9.657964                       | Up                               | 4.55E-13 | 1.58E-12 |
| LHX5    | 2084        | 0                    | 43                  | 0.001          | 0.607769      | 9.247379                       | Up                               | 1.14E-13 | 4.11E-13 |
| TNNT3   | 1217        | 0                    | 18.5                | 0.001          | 0.451429      | 8.818356                       | Up                               | 3.81E-06 | 9.16E-06 |
| KISS1   | 731         | 0                    | 8                   | 0.001          | 0.32828       | 8.358783                       | Up                               | 0.003906 | 0.007649 |
| CBFA2T3 | 4038        | 0                    | 40                  | 0.001          | 0.293598      | 8.197697                       | Up                               | 9.09E-13 | 3.09E-12 |
| CA9     | 1561        | 15                   | 4318                | 0.280077       | 81.84002      | 8.190841                       | Up                               | 7.51E-08 | 1.95E-07 |
| C2orf66 | 1386        | 0                    | 11.5                | 0.001          | 0.243596      | 7.928347                       | Up                               | 0.000488 | 0.001031 |
| S1PR4   | 1612        | 0                    | 12.5                | 0.001          | 0.227386      | 7.829003                       | Up                               | 0.000244 | 0.000526 |
| MYCL1   | 3260        | 1                    | 211                 | 0.009269       | 1.917455      | 7.692531                       | Up                               | 0.000575 | 0.001207 |
| FAM110C | 3963        | 0                    | 25                  | 0.001          | 0.185346      | 7.534076                       | Up                               | 2.98E-08 | 7.89E-08 |
| ADRA2C  | 1958        | 0                    | 12                  | 0.001          | 0.182378      | 7.510787                       | Up                               | 0.000244 | 0.000526 |
| HAND1   | 1749        | 0                    | 8.5                 | 0.001          | 0.145065      | 7.180554                       | Up                               | 0.003906 | 0.007651 |
| ADRB3   | 2660        | 0                    | 12                  | 0.001          | 0.134247      | 7.068741                       | Up                               | 0.000244 | 0.000526 |
| MT3     | 599         | 15                   | 1798                | 0.731798       | 88.79589      | 6.922903                       | Up                               | 7.51E-08 | 1.96E-07 |
| OLIG1   | 2293        | 0                    | 8                   | 0.001          | 0.10403       | 6.700858                       | Up                               | 0.003906 | 0.00765  |
| RIMS4   | 5207        | 0                    | 18                  | 0.001          | 0.101358      | 6.663314                       | Up                               | 3.81E-06 | 9.16E-06 |
| ATG9B   | 4577        | 2.5                  | 241.5               | 0.016505       | 1.56346       | 6.565683                       | Up                               | 0.000115 | 0.000255 |
| CHRNA4  | 5487        | 6                    | 491                 | 0.032625       | 2.645282      | 6.341321                       | Up                               | 1.62E-05 | 3.75E-05 |
| SNCB    | 1467        | 1                    | 76                  | 0.020598       | 1.533523      | 6.218185                       | Up                               | 0.000575 | 0.001207 |

|              |      |       |         |          |          |          |    |          |          |
|--------------|------|-------|---------|----------|----------|----------|----|----------|----------|
| PNCK         | 1522 | 1     | 64      | 0.019854 | 1.241602 | 5.966639 | Up | 0.000575 | 0.001207 |
| C7orf51      | 3581 | 3     | 180     | 0.024995 | 1.482002 | 5.889792 | Up | 7.36E-05 | 0.000164 |
| KISS1R       | 1650 | 0.5   | 29.5    | 0.009157 | 0.528386 | 5.850596 | Up | 1.86E-09 | 5.16E-09 |
| CLEC3B       | 886  | 4     | 233.5   | 0.136423 | 7.751723 | 5.828363 | Up | 4.59E-05 | 0.000104 |
| NDUFA4L2     | 1275 | 92    | 4945    | 2.11381  | 114.7108 | 5.762012 | Up | 6.66E-15 | 2.51E-14 |
| C2orf72      | 3595 | 15    | 770.5   | 0.120337 | 6.343467 | 5.720125 | Up | 7.51E-08 | 1.96E-07 |
| KCNC3        | 3176 | 1     | 54      | 0.009514 | 0.500327 | 5.71662  | Up | 0.000575 | 0.001207 |
| CREG2        | 3488 | 4     | 163     | 0.034653 | 1.384039 | 5.319752 | Up | 4.59E-05 | 0.000104 |
| C20orf46     | 1720 | 5     | 187     | 0.085173 | 3.22193  | 5.241379 | Up | 2.76E-05 | 6.33E-05 |
| L1CAM        | 5034 | 24.5  | 798.5   | 0.144103 | 4.688747 | 5.02403  | Up | 2.47E-10 | 7.08E-10 |
| EGR2         | 2892 | 8     | 244.5   | 0.080415 | 2.505637 | 4.961563 | Up | 5.24E-06 | 1.25E-05 |
| AK4          | 6998 | 555   | 16182   | 2.300095 | 68.57935 | 4.898009 | Up | 0        | 0        |
| JAM2         | 1721 | 5     | 147     | 0.085124 | 2.532435 | 4.894817 | Up | 2.76E-05 | 6.33E-05 |
| PPFIA4       | 5055 | 101   | 2836.5  | 0.583779 | 16.60567 | 4.83011  | Up | 0        | 0        |
| ISM2         | 3006 | 25    | 693     | 0.250547 | 6.827634 | 4.768231 | Up | 1.30E-10 | 3.79E-10 |
| CSF2         | 781  | 13    | 334.5   | 0.476536 | 12.68913 | 4.734863 | Up | 2.60E-07 | 6.61E-07 |
| PTPRN        | 3801 | 5     | 136     | 0.03975  | 1.056708 | 4.732495 | Up | 2.76E-05 | 6.33E-05 |
| HRH3         | 2680 | 0.5   | 13.5    | 0.005638 | 0.146495 | 4.699624 | Up | 0.000122 | 0.000269 |
| GPR146       | 1776 | 43    | 1094.5  | 0.721283 | 18.21453 | 4.658382 | Up | 1.18E-13 | 4.25E-13 |
| C5orf46      | 587  | 2     | 46      | 0.095137 | 2.342133 | 4.621673 | Up | 0.000115 | 0.000255 |
| LOC100507405 | 1397 | 23    | 546     | 0.479428 | 11.56035 | 4.591727 | Up | 4.68E-10 | 1.33E-09 |
| NEUROD2      | 3048 | 0.5   | 11      | 0.00458  | 0.104381 | 4.510207 | Up | 0.000488 | 0.001031 |
| NDRG1        | 3123 | 817.5 | 18022.5 | 7.599885 | 170.9985 | 4.491863 | Up | 1.28E-12 | 4.29E-12 |
| ENO2         | 2423 | 1206  | 25923.5 | 14.43452 | 316.8643 | 4.45627  | Up | 4.33E-12 | 1.39E-11 |
| CDK18        | 3122 | 19    | 407.5   | 0.178754 | 3.868027 | 4.43555  | Up | 6.02E-09 | 1.63E-08 |

|              |      |       |        |          |          |          |    |          |          |
|--------------|------|-------|--------|----------|----------|----------|----|----------|----------|
| PRRT4        | 2411 | 1     | 22     | 0.012533 | 0.271042 | 4.434688 | Up | 0.000578 | 0.001213 |
| C4orf47      | 974  | 7     | 144    | 0.210101 | 4.39072  | 4.385302 | Up | 9.28E-06 | 2.18E-05 |
| SLC38A5      | 2006 | 9     | 184.5  | 0.130996 | 2.720461 | 4.376252 | Up | 2.92E-06 | 7.05E-06 |
| EGLN3        | 2722 | 360.5 | 7206   | 3.849822 | 78.40573 | 4.348095 | Up | 4.37E-13 | 1.52E-12 |
| BEND5        | 1342 | 8     | 162.5  | 0.180135 | 3.585955 | 4.315209 | Up | 5.24E-06 | 1.25E-05 |
| DKFZp451A211 | 5341 | 86    | 1667.5 | 0.466365 | 9.228026 | 4.306492 | Up | 0        | 0        |
| CERS1        | 2137 | 8     | 158    | 0.110974 | 2.18867  | 4.301763 | Up | 5.24E-06 | 1.25E-05 |
| NOTUM        | 2281 | 0.5   | 10     | 0.006624 | 0.12931  | 4.287036 | Up | 0.000977 | 0.002013 |
| LOC100507855 | 672  | 27    | 509    | 1.169705 | 22.41653 | 4.260347 | Up | 3.64E-11 | 1.08E-10 |
| RGS16        | 2432 | 4     | 74.5   | 0.047813 | 0.907193 | 4.245942 | Up | 4.59E-05 | 0.000104 |
| SH3D21       | 2333 | 119   | 2206.5 | 1.481314 | 28.02073 | 4.241545 | Up | 0        | 0        |
| PDZD4        | 3745 | 13    | 227.5  | 0.10183  | 1.795799 | 4.140388 | Up | 2.60E-07 | 6.61E-07 |
| C7orf52      | 2953 | 1     | 18     | 0.010233 | 0.178239 | 4.122531 | Up | 0.000615 | 0.001288 |
| PMP2         | 3579 | 1     | 17     | 0.008443 | 0.144182 | 4.093982 | Up | 0.000651 | 0.001361 |
| GPR160       | 2021 | 10    | 161    | 0.146111 | 2.360769 | 4.014115 | Up | 1.61E-06 | 3.94E-06 |
| ATF3         | 1662 | 313.5 | 4916.5 | 5.473438 | 87.7148  | 4.002301 | Up | 0        | 0        |
| C10orf10     | 2060 | 255   | 4006.5 | 3.599604 | 57.60043 | 4.00017  | Up | 0        | 0        |
| C7orf68      | 1432 | 293   | 4449.5 | 5.960833 | 91.99592 | 3.947984 | Up | 5.51E-13 | 1.90E-12 |
| PDGFB        | 3393 | 14    | 208.5  | 0.119271 | 1.822881 | 3.933903 | Up | 1.40E-07 | 3.60E-07 |
| FAM115C      | 2983 | 230.5 | 3370   | 2.253787 | 33.44117 | 3.891202 | Up | 3.86E-13 | 1.35E-12 |
| C12orf68     | 2380 | 4     | 58     | 0.049822 | 0.722288 | 3.857729 | Up | 4.59E-05 | 0.000104 |
| LANCL3       | 3259 | 4     | 56.5   | 0.03568  | 0.512407 | 3.844109 | Up | 4.59E-05 | 0.000104 |
| ZP1          | 1972 | 46    | 659.5  | 0.696727 | 9.878193 | 3.825582 | Up | 7.84E-14 | 2.85E-13 |
| GFAP         | 2193 | 13.5  | 182    | 0.179216 | 2.515241 | 3.810925 | Up | 2.60E-07 | 6.61E-07 |
| AKAP12       | 8246 | 750.5 | 10061  | 2.651978 | 36.18043 | 3.770069 | Up | 0        | 0        |

|          |      |         |          |          |          |          |    |          |          |
|----------|------|---------|----------|----------|----------|----------|----|----------|----------|
| FAM153B  | 2096 | 1       | 14       | 0.014417 | 0.195919 | 3.764438 | Up | 0.001094 | 0.002244 |
| SERPINE1 | 3153 | 29647.5 | 382313.5 | 273.1052 | 3589.234 | 3.716148 | Up | 1.90E-10 | 5.47E-10 |
| GDF1     | 2558 | 3       | 38.5     | 0.034542 | 0.443149 | 3.681376 | Up | 7.36E-05 | 0.000164 |
| VLDLR    | 3562 | 458.5   | 5754.5   | 3.754951 | 47.8275  | 3.670974 | Up | 1.74E-12 | 5.78E-12 |
| BNIP3L   | 3505 | 2394.5  | 29248    | 19.82032 | 247.4938 | 3.642341 | Up | 0        | 0        |
| LINGO1   | 2932 | 10      | 123      | 0.103061 | 1.214319 | 3.558572 | Up | 1.61E-06 | 3.94E-06 |
| CAMK2B   | 3935 | 10      | 114.5    | 0.073876 | 0.861058 | 3.542935 | Up | 1.61E-06 | 3.94E-06 |
| EFCAB3   | 1694 | 30      | 352.5    | 0.529044 | 6.151593 | 3.5395   | Up | 5.60E-12 | 1.78E-11 |
| LINGO3   | 2130 | 2       | 21.5     | 0.026218 | 0.300346 | 3.517969 | Up | 0.000151 | 0.000331 |
| ANO9     | 2879 | 1       | 11.5     | 0.010496 | 0.119757 | 3.512222 | Up | 0.003992 | 0.007806 |
| SH2D2A   | 1630 | 5       | 58       | 0.092692 | 1.056385 | 3.510546 | Up | 2.76E-05 | 6.33E-05 |
| EPHA3    | 5837 | 141.5   | 1581.5   | 0.713464 | 8.024479 | 3.491496 | Up | 0        | 0        |
| WFDC3    | 1000 | 14      | 150.5    | 0.409277 | 4.458834 | 3.445517 | Up | 1.40E-07 | 3.60E-07 |
| PTGES    | 1787 | 6       | 65       | 0.09889  | 1.074067 | 3.44112  | Up | 1.62E-05 | 3.75E-05 |
| INSIG2   | 2592 | 443     | 4687.5   | 4.960425 | 53.63997 | 3.434773 | Up | 0        | 0        |
| SPINK1   | 454  | 4       | 43       | 0.26118  | 2.805613 | 3.425202 | Up | 4.59E-05 | 0.000104 |
| NPAS1    | 2066 | 42.5    | 447.5    | 0.598284 | 6.421017 | 3.423899 | Up | 1.10E-13 | 3.98E-13 |
| ESM1     | 1939 | 1       | 11       | 0.015584 | 0.167034 | 3.421991 | Up | 0.003992 | 0.007807 |
| LRRC4B   | 2958 | 1       | 11       | 0.010216 | 0.107557 | 3.396256 | Up | 0.003992 | 0.007806 |
| RASSF2   | 5426 | 28      | 284      | 0.151915 | 1.549196 | 3.350183 | Up | 1.93E-11 | 5.89E-11 |
| RTN4RL1  | 3183 | 2       | 20       | 0.018266 | 0.185781 | 3.346383 | Up | 0.000181 | 0.000395 |
| ESPN     | 3531 | 2       | 20       | 0.016466 | 0.167472 | 3.346383 | Up | 0.000181 | 0.000395 |
| BAI1     | 5535 | 4       | 40       | 0.021008 | 0.213415 | 3.344636 | Up | 4.59E-05 | 0.000104 |
| SPAG4    | 1452 | 67      | 666      | 1.348504 | 13.57193 | 3.331195 | Up | 0        | 0        |
| MXI1     | 3272 | 234.5   | 2278.5   | 2.087102 | 20.64487 | 3.30621  | Up | 4.49E-13 | 1.56E-12 |



|          |      |        |         |          |          |          |    |          |          |
|----------|------|--------|---------|----------|----------|----------|----|----------|----------|
| DOK3     | 2354 | 108    | 1046.5  | 1.32982  | 13.14934 | 3.305687 | Up | 0        | 0        |
| CAMK2N1  | 2371 | 32.5   | 308     | 0.396295 | 3.844118 | 3.278004 | Up | 1.74E-12 | 5.78E-12 |
| BNIP3    | 1535 | 3013   | 28298   | 56.97037 | 546.0767 | 3.26082  | Up | 0        | 0        |
| GDF6     | 3716 | 2      | 18.5    | 0.015646 | 0.14823  | 3.243973 | Up | 0.000337 | 0.000719 |
| SIGLEC14 | 2113 | 6      | 56      | 0.083633 | 0.784148 | 3.228987 | Up | 1.62E-05 | 3.75E-05 |
| HHIP     | 3555 | 91.5   | 841.5   | 0.750317 | 7.017655 | 3.225417 | Up | 0        | 0        |
| ARC      | 2985 | 11     | 100.5   | 0.109048 | 0.994409 | 3.188873 | Up | 8.84E-07 | 2.19E-06 |
| IGFBP3   | 2620 | 1305   | 11463.5 | 14.48266 | 129.5305 | 3.160893 | Up | 7.23E-12 | 2.27E-11 |
| OTP      | 2702 | 2      | 17.5    | 0.021518 | 0.192358 | 3.16021  | Up | 0.000518 | 0.001092 |
| GRIN1    | 4100 | 3      | 27      | 0.021551 | 0.191166 | 3.149022 | Up | 7.82E-05 | 0.000174 |
| CYP1A1   | 2608 | 7      | 60      | 0.076706 | 0.679127 | 3.146275 | Up | 9.28E-06 | 2.18E-05 |
| LOX      | 5177 | 9774   | 83803   | 54.72542 | 479.6815 | 3.131794 | Up | 0        | 0        |
| FAM162A  | 838  | 691.5  | 5919.5  | 23.93947 | 209.5574 | 3.129882 | Up | 1.59E-12 | 5.30E-12 |
| ERO1L    | 3334 | 2179   | 18147   | 18.94464 | 161.4672 | 3.09138  | Up | 0        | 0        |
| ITGAM    | 4745 | 17     | 146     | 0.107778 | 0.909546 | 3.077091 | Up | 2.14E-08 | 5.69E-08 |
| ALOXE3   | 3415 | 9      | 75      | 0.078292 | 0.651552 | 3.056935 | Up | 2.92E-06 | 7.05E-06 |
| SIK1     | 4706 | 1045   | 8168.5  | 6.44572  | 51.39031 | 2.995083 | Up | 0        | 0        |
| TGFA     | 4261 | 43     | 336.5   | 0.295247 | 2.345081 | 2.989642 | Up | 1.18E-13 | 4.25E-13 |
| AFAP1L1  | 4223 | 230    | 1789.5  | 1.583267 | 12.5573  | 2.987551 | Up | 3.86E-13 | 1.35E-12 |
| HTR2A    | 3564 | 1.5    | 12      | 0.012396 | 0.097384 | 2.973817 | Up | 0.002405 | 0.0048   |
| SLC6A8   | 3129 | 1470.5 | 11242   | 13.66305 | 106.367  | 2.9607   | Up | 2.06E-12 | 6.83E-12 |
| NRN1     | 2072 | 1537   | 11663   | 21.50097 | 166.9261 | 2.956735 | Up | 4.01E-12 | 1.29E-11 |
| PVRL4    | 3520 | 71.5   | 548.5   | 0.596192 | 4.624008 | 2.955295 | Up | 0        | 0        |
| ANKRD1   | 1994 | 148    | 1118.5  | 2.159966 | 16.63375 | 2.945033 | Up | 0        | 0        |
| IL8      | 1718 | 2538   | 18973   | 42.74962 | 327.7224 | 2.938491 | Up | 0        | 0        |

|           |       |        |        |          |          |          |    |          |          |
|-----------|-------|--------|--------|----------|----------|----------|----|----------|----------|
| NDNF      | 2911  | 78.5   | 588.5  | 0.784122 | 5.982909 | 2.931696 | Up | 0        | 0        |
| KIAA1244  | 14895 | 285    | 2143.5 | 0.562004 | 4.259676 | 2.922091 | Up | 6.22E-13 | 2.14E-12 |
| NMU       | 818   | 9      | 66.5   | 0.321245 | 2.419565 | 2.913    | Up | 2.92E-06 | 7.05E-06 |
| DUOXA2    | 1451  | 3      | 23     | 0.062476 | 0.468327 | 2.906141 | Up | 0.000123 | 0.00027  |
| ZSWIM5    | 5860  | 187    | 1360   | 0.927861 | 6.873353 | 2.889033 | Up | 3.37E-13 | 1.18E-12 |
| ANO7      | 916   | 18.5   | 135    | 0.5915   | 4.361116 | 2.882248 | Up | 1.14E-08 | 3.05E-08 |
| MT1X      | 468   | 862.5  | 6209.5 | 53.42891 | 393.0851 | 2.879149 | Up | 0        | 0        |
| LIMS2     | 2173  | 2      | 15     | 0.027812 | 0.202946 | 2.867323 | Up | 0.001428 | 0.002907 |
| DPYSL4    | 2732  | 1373   | 9813   | 14.58772 | 106.3424 | 2.865891 | Up | 5.26E-12 | 1.68E-11 |
| STC1      | 3897  | 3733   | 26429  | 27.78465 | 200.9926 | 2.854783 | Up | 0        | 0        |
| PFKFB4    | 3503  | 1167.5 | 8257   | 9.672453 | 69.73147 | 2.849856 | Up | 3.45E-12 | 1.12E-11 |
| HOXD1     | 1991  | 6      | 41.5   | 0.086452 | 0.618682 | 2.839226 | Up | 1.63E-05 | 3.77E-05 |
| LOC646626 | 748   | 3      | 22     | 0.121194 | 0.865985 | 2.837028 | Up | 0.000162 | 0.000353 |
| BOK       | 2617  | 2      | 14     | 0.022216 | 0.158556 | 2.835298 | Up | 0.002465 | 0.004915 |
| EFNA3     | 1782  | 92.5   | 638.5  | 1.506075 | 10.59661 | 2.814737 | Up | 6.66E-15 | 2.50E-14 |
| GPR155    | 7324  | 376.5  | 2596.5 | 1.496348 | 10.50568 | 2.811652 | Up | 4.39E-13 | 1.53E-12 |
| LCN15     | 762   | 2      | 13.5   | 0.074794 | 0.523686 | 2.807712 | Up | 0.004296 | 0.008375 |
| TTC29     | 1798  | 2      | 14     | 0.032336 | 0.226003 | 2.805122 | Up | 0.002465 | 0.004915 |
| C2orf82   | 480   | 2      | 13     | 0.116345 | 0.810171 | 2.799822 | Up | 0.004296 | 0.008374 |
| ANG       | 1222  | 68.5   | 464    | 1.647857 | 11.24753 | 2.770946 | Up | 0        | 0        |
| KIF1A     | 8843  | 8      | 55     | 0.027077 | 0.184584 | 2.769113 | Up | 5.24E-06 | 1.25E-05 |
| DUSP1     | 2040  | 2609   | 17454  | 37.19363 | 253.5255 | 2.769004 | Up | 0        | 0        |
| TFF2      | 717   | 2      | 14     | 0.084289 | 0.570733 | 2.7594   | Up | 0.002465 | 0.004914 |
| ZMAT4     | 2482  | 30     | 196    | 0.349522 | 2.339084 | 2.742486 | Up | 5.60E-12 | 1.78E-11 |
| INHBA     | 2175  | 139    | 940    | 1.910045 | 12.77843 | 2.742032 | Up | 1.77E-13 | 6.32E-13 |

|         |      |        |         |          |          |          |    |          |          |
|---------|------|--------|---------|----------|----------|----------|----|----------|----------|
| PRODH   | 2423 | 3      | 20      | 0.036466 | 0.243463 | 2.739066 | Up | 0.000351 | 0.000748 |
| SLC16A3 | 2031 | 2289   | 14999.5 | 32.77822 | 218.3256 | 2.735672 | Up | 0        | 0        |
| ISG20   | 974  | 18.5   | 121     | 0.559811 | 3.693038 | 2.721795 | Up | 1.14E-08 | 3.05E-08 |
| HSPC159 | 3842 | 8      | 52      | 0.061129 | 0.401148 | 2.714216 | Up | 5.24E-06 | 1.25E-05 |
| NXPH4   | 1821 | 997.5  | 6435.5  | 15.95512 | 104.6056 | 2.712869 | Up | 0        | 0        |
| FAM183A | 530  | 2      | 13.5    | 0.114029 | 0.74752  | 2.712716 | Up | 0.004296 | 0.008373 |
| GALNTL4 | 2531 | 18     | 118     | 0.211275 | 1.377287 | 2.704635 | Up | 1.14E-08 | 3.05E-08 |
| B3GNT4  | 1554 | 7.5    | 48      | 0.140669 | 0.91456  | 2.700771 | Up | 9.28E-06 | 2.18E-05 |
| ALDOC   | 1665 | 1045.5 | 6674    | 18.28118 | 118.6974 | 2.698857 | Up | 0        | 0        |
| OSCAR   | 1385 | 8.5    | 54.5    | 0.179652 | 1.161895 | 2.693206 | Up | 5.24E-06 | 1.25E-05 |
| PPP2R2C | 4161 | 9.5    | 62.5    | 0.068714 | 0.443552 | 2.690422 | Up | 2.92E-06 | 7.05E-06 |
| C21orf7 | 1997 | 100.5  | 634.5   | 1.460958 | 9.416823 | 2.688325 | Up | 1.75E-14 | 6.52E-14 |
| SNTA1   | 2345 | 290.5  | 1836.5  | 3.615173 | 23.16791 | 2.679991 | Up | 2.80E-13 | 9.85E-13 |
| 3-Mar   | 4158 | 33     | 209.5   | 0.234303 | 1.498246 | 2.676827 | Up | 1.01E-12 | 3.43E-12 |
| PDK1    | 4576 | 697    | 4353.5  | 4.416327 | 28.22126 | 2.675864 | Up | 0        | 0        |
| APLN    | 3238 | 39     | 242     | 0.348363 | 2.217553 | 2.670306 | Up | 1.32E-13 | 4.75E-13 |
| ARHGDI3 | 942  | 2      | 13      | 0.064156 | 0.408267 | 2.66985  | Up | 0.004296 | 0.008375 |
| FAM43B  | 2640 | 10     | 61.5    | 0.109245 | 0.69248  | 2.664207 | Up | 1.61E-06 | 3.94E-06 |
| PPP1R3C | 2646 | 347    | 2085    | 3.797988 | 23.36503 | 2.621044 | Up | 1.58E-13 | 5.65E-13 |
| ANGPTL4 | 1967 | 8308.5 | 50132   | 122.8324 | 754.1229 | 2.618108 | Up | 0        | 0        |
| HOXA13  | 2514 | 128.5  | 770     | 1.48018  | 9.075035 | 2.616131 | Up | 3.69E-14 | 1.36E-13 |
| IL2RG   | 1560 | 66     | 406     | 1.257842 | 7.70999  | 2.615779 | Up | 0        | 0        |
| KCNT1   | 4782 | 4      | 25      | 0.025276 | 0.1545   | 2.611762 | Up | 0.000105 | 0.000233 |
| CAMK2A  | 4885 | 4      | 25      | 0.024743 | 0.15095  | 2.608964 | Up | 0.000105 | 0.000233 |
| PRR5L   | 3378 | 10     | 61      | 0.088095 | 0.535004 | 2.602412 | Up | 1.61E-06 | 3.94E-06 |

|          |      |       |        |          |          |          |    |          |          |
|----------|------|-------|--------|----------|----------|----------|----|----------|----------|
| GPR35    | 2293 | 3     | 18     | 0.038534 | 0.233912 | 2.601769 | Up | 0.000929 | 0.001919 |
| C15orf48 | 929  | 20    | 118    | 0.623367 | 3.763116 | 2.593774 | Up | 3.18E-09 | 8.74E-09 |
| VEGFA    | 3494 | 3466  | 20116  | 28.74524 | 170.5386 | 2.568704 | Up | 0        | 0        |
| MAP6D1   | 2154 | 60.5  | 356.5  | 0.82316  | 4.879962 | 2.567625 | Up | 0        | 0        |
| TMEM145  | 1779 | 23.5  | 136.5  | 0.38433  | 2.276748 | 2.566559 | Up | 4.68E-10 | 1.33E-09 |
| ZNF395   | 4807 | 2045  | 11882  | 12.36611 | 73.23642 | 2.56617  | Up | 0        | 0        |
| SYTL2    | 4060 | 354   | 2073.5 | 2.558428 | 15.13699 | 2.564749 | Up | 0        | 0        |
| CELF4    | 4067 | 3.5   | 21     | 0.025441 | 0.149696 | 2.556833 | Up | 0.00023  | 0.000497 |
| SORBS2   | 5529 | 120   | 695.5  | 0.635497 | 3.719033 | 2.548971 | Up | 0        | 0        |
| FAM83E   | 2011 | 5     | 29     | 0.072848 | 0.425631 | 2.546632 | Up | 5.00E-05 | 0.000113 |
| LBH      | 2956 | 33    | 188    | 0.323367 | 1.885005 | 2.543324 | Up | 1.01E-12 | 3.43E-12 |
| MUC1     | 1161 | 132.5 | 749.5  | 3.291462 | 19.15865 | 2.541195 | Up | 1.14E-13 | 4.12E-13 |
| ANKRD37  | 934  | 113.5 | 645.5  | 3.533229 | 20.50478 | 2.536901 | Up | 2.08E-13 | 7.38E-13 |
| RGMA     | 3058 | 3     | 17.5   | 0.028894 | 0.167624 | 2.536383 | Up | 0.001563 | 0.003169 |
| POU3F1   | 2928 | 5     | 28     | 0.04925  | 0.284164 | 2.528533 | Up | 6.62E-05 | 0.000149 |
| RNF122   | 1868 | 114   | 645    | 1.77286  | 10.21821 | 2.526992 | Up | 7.79E-14 | 2.83E-13 |
| TFR2     | 2471 | 9     | 52     | 0.109131 | 0.625458 | 2.518848 | Up | 2.93E-06 | 7.07E-06 |
| KCTD11   | 3081 | 601   | 3353   | 5.644544 | 32.2137  | 2.512746 | Up | 1.08E-13 | 3.92E-13 |
| DHRS13   | 1939 | 107   | 593    | 1.589386 | 9.044771 | 2.508614 | Up | 0        | 0        |
| TMEM158  | 1876 | 887   | 4910   | 13.70259 | 77.60263 | 2.501658 | Up | 1.58E-12 | 5.27E-12 |
| ARVCF    | 4056 | 80.5  | 446.5  | 0.576252 | 3.262653 | 2.501273 | Up | 0        | 0        |
| GADD45B  | 1393 | 567.5 | 3143   | 11.81541 | 66.86604 | 2.500604 | Up | 0        | 0        |
| SEMA7A   | 3393 | 385   | 2103   | 3.297206 | 18.32782 | 2.47472  | Up | 6.91E-13 | 2.37E-12 |
| RNASE4   | 1805 | 143.5 | 779.5  | 2.315885 | 12.79509 | 2.465954 | Up | 0        | 0        |
| MAFF     | 2234 | 435.5 | 2351   | 5.653377 | 31.17941 | 2.463409 | Up | 1.31E-12 | 4.39E-12 |

|              |       |         |         |          |          |          |    |          |          |
|--------------|-------|---------|---------|----------|----------|----------|----|----------|----------|
| GOLGA7B      | 2894  | 4       | 22      | 0.040973 | 0.225806 | 2.462343 | Up | 0.000357 | 0.00076  |
| PLOD2        | 4072  | 16023.5 | 86139.5 | 114.0873 | 627.467  | 2.459401 | Up | 0        | 0        |
| PPP1R3B      | 5574  | 437     | 2336.5  | 2.272298 | 12.41587 | 2.449962 | Up | 8.15E-13 | 2.78E-12 |
| LOC100130503 | 3038  | 3       | 16.5    | 0.02984  | 0.16227  | 2.443091 | Up | 0.00265  | 0.005267 |
| C3orf58      | 3416  | 518.5   | 2747.5  | 4.395135 | 23.84363 | 2.439625 | Up | 0        | 0        |
| GYS1         | 3635  | 3388    | 17923.5 | 27.05126 | 145.9496 | 2.431702 | Up | 0        | 0        |
| HK2          | 7109  | 261.5   | 1378.5  | 1.072636 | 5.744243 | 2.420957 | Up | 2.23E-13 | 7.90E-13 |
| LOC554223    | 1301  | 10      | 53      | 0.225209 | 1.204667 | 2.419301 | Up | 1.63E-06 | 3.99E-06 |
| POU3F2       | 4172  | 10      | 52.5    | 0.069679 | 0.372027 | 2.416606 | Up | 1.65E-06 | 4.02E-06 |
| PRSS53       | 2028  | 130     | 677     | 1.8663   | 9.861709 | 2.401657 | Up | 0        | 0        |
| SLAMF9       | 1170  | 40      | 214.5   | 1.03308  | 5.413267 | 2.389547 | Up | 1.16E-13 | 4.18E-13 |
| FOSB         | 3776  | 62      | 314.5   | 0.472759 | 2.467351 | 2.383786 | Up | 0        | 0        |
| 4-Mar        | 4466  | 52      | 266.5   | 0.343618 | 1.765667 | 2.361337 | Up | 5.13E-14 | 1.88E-13 |
| RAP1GAP      | 3301  | 13      | 65      | 0.113441 | 0.580797 | 2.356088 | Up | 2.61E-07 | 6.63E-07 |
| RORA         | 10974 | 32      | 167     | 0.088114 | 0.447839 | 2.345538 | Up | 1.74E-12 | 5.78E-12 |
| CA12         | 3959  | 459.5   | 2272.5  | 3.361989 | 16.99325 | 2.337575 | Up | 1.20E-12 | 4.03E-12 |
| ICAM5        | 3005  | 176.5   | 877.5   | 1.709548 | 8.634767 | 2.336542 | Up | 0        | 0        |
| IGFBP1       | 1660  | 16      | 81      | 0.287107 | 1.447519 | 2.333924 | Up | 4.02E-08 | 1.06E-07 |
| GOLGA6D      | 3449  | 5       | 24.5    | 0.04181  | 0.208982 | 2.321454 | Up | 0.000353 | 0.000751 |
| KCNK13       | 2517  | 15      | 74.5    | 0.175522 | 0.875988 | 2.319257 | Up | 7.52E-08 | 1.96E-07 |
| RCOR2        | 2621  | 26      | 127.5   | 0.290124 | 1.442747 | 2.314079 | Up | 6.87E-11 | 2.02E-10 |
| FABP6        | 672   | 8       | 39      | 0.346073 | 1.719038 | 2.312452 | Up | 8.54E-06 | 2.01E-05 |
| HOMER1       | 4228  | 365     | 1764.5  | 2.512046 | 12.37279 | 2.300236 | Up | 6.76E-13 | 2.32E-12 |
| IRS2         | 7014  | 1111.5  | 5309.5  | 4.600249 | 22.44552 | 2.286643 | Up | 5.50E-12 | 1.75E-11 |
| FST          | 2098  | 2421    | 11553.5 | 33.46364 | 163.2574 | 2.286482 | Up | 0        | 0        |

|          |      |         |         |          |          |          |    |          |          |
|----------|------|---------|---------|----------|----------|----------|----|----------|----------|
| PTGIR    | 2103 | 4       | 19      | 0.055293 | 0.269479 | 2.28501  | Up | 0.00159  | 0.003221 |
| SUSD2    | 3201 | 43.5    | 208.5   | 0.397379 | 1.931996 | 2.281505 | Up | 1.18E-13 | 4.25E-13 |
| PFKFB3   | 4553 | 2497.5  | 11827   | 15.91122 | 76.951   | 2.273896 | Up | 0        | 0        |
| PEAR1    | 4866 | 32.5    | 156.5   | 0.1964   | 0.949634 | 2.273579 | Up | 1.74E-12 | 5.79E-12 |
| SCN3B    | 6081 | 6.5     | 31      | 0.031168 | 0.150505 | 2.271696 | Up | 4.05E-05 | 9.21E-05 |
| CLDN14   | 1768 | 58.5    | 275     | 0.958959 | 4.60078  | 2.262337 | Up | 1.35E-14 | 5.05E-14 |
| SLC2A3   | 3938 | 745.5   | 3490.5  | 5.489701 | 26.27493 | 2.258888 | Up | 3.42E-13 | 1.20E-12 |
| PGK1     | 2439 | 21130.5 | 98791   | 251.2641 | 1200.088 | 2.255864 | Up | 0        | 0        |
| CACNB4   | 7979 | 106.5   | 499.5   | 0.389381 | 1.856199 | 2.253097 | Up | 0        | 0        |
| NEBL     | 6956 | 381.5   | 1769.5  | 1.596902 | 7.552442 | 2.241668 | Up | 3.02E-13 | 1.06E-12 |
| POU2F2   | 3669 | 9       | 43.5    | 0.074123 | 0.349546 | 2.237482 | Up | 4.14E-06 | 9.93E-06 |
| PLA2G4D  | 3584 | 10      | 48      | 0.084313 | 0.396947 | 2.235127 | Up | 1.88E-06 | 4.58E-06 |
| PTGS1    | 4982 | 84      | 392     | 0.494289 | 2.325748 | 2.234268 | Up | 0        | 0        |
| PTPRF    | 7733 | 6000    | 27479.5 | 22.56786 | 105.2114 | 2.220949 | Up | 1.43E-11 | 4.40E-11 |
| STC2     | 5361 | 6492.5  | 29586.5 | 35.12708 | 163.4478 | 2.218174 | Up | 2.56E-11 | 7.70E-11 |
| PRKAA2   | 9369 | 63      | 290     | 0.197069 | 0.916188 | 2.216946 | Up | 0        | 0        |
| AANAT    | 1048 | 9       | 40.5    | 0.246364 | 1.140949 | 2.211374 | Up | 8.54E-06 | 2.01E-05 |
| SLC2A1   | 3687 | 10740   | 48717.5 | 84.56376 | 391.1447 | 2.209591 | Up | 0        | 0        |
| ANXA8L2  | 2053 | 71      | 323     | 1.010379 | 4.663078 | 2.206386 | Up | 0        | 0        |
| WSB1     | 2849 | 1087    | 4794    | 11.04342 | 49.89426 | 2.175687 | Up | 1.55E-12 | 5.16E-12 |
| MAP7D2   | 4158 | 96      | 427.5   | 0.675864 | 3.045461 | 2.171856 | Up | 0        | 0        |
| COL13A1  | 2816 | 1133.5  | 4969.5  | 11.68282 | 52.27286 | 2.161674 | Up | 2.19E-12 | 7.24E-12 |
| EGLN1    | 7102 | 2629    | 11497.5 | 10.75126 | 48.00531 | 2.158689 | Up | 0        | 0        |
| ANKZF1   | 2594 | 466.5   | 2003.5  | 5.216198 | 22.87586 | 2.132755 | Up | 4.74E-13 | 1.65E-12 |
| ARHGEF37 | 4865 | 184.5   | 795.5   | 1.104931 | 4.83938  | 2.130865 | Up | 3.15E-13 | 1.11E-12 |

|           |       |        |        |          |          |          |    |          |          |
|-----------|-------|--------|--------|----------|----------|----------|----|----------|----------|
| CHSY1     | 4567  | 2056   | 8812.5 | 13.09276 | 57.18663 | 2.126909 | Up | 0        | 0        |
| FAM83H    | 5604  | 9      | 38     | 0.046482 | 0.202253 | 2.121427 | Up | 1.81E-05 | 4.20E-05 |
| WDR69     | 1669  | 19     | 82     | 0.335749 | 1.457043 | 2.117588 | Up | 6.12E-09 | 1.66E-08 |
| PLAT      | 3173  | 362.5  | 1531.5 | 3.313712 | 14.27029 | 2.106495 | Up | 1.14E-12 | 3.85E-12 |
| CTGF      | 2358  | 2413.5 | 10145  | 29.70011 | 127.4345 | 2.101216 | Up | 0        | 0        |
| CRB2      | 5641  | 4      | 17     | 0.020613 | 0.088432 | 2.100988 | Up | 0.004389 | 0.008551 |
| SLC1A1    | 3757  | 666.5  | 2792.5 | 5.148709 | 22.02383 | 2.096782 | Up | 1.73E-14 | 6.44E-14 |
| PPP1R13L  | 3120  | 344    | 1438   | 3.205171 | 13.64572 | 2.089975 | Up | 5.51E-13 | 1.90E-12 |
| LRRC4     | 3723  | 5      | 22     | 0.040582 | 0.172065 | 2.084032 | Up | 0.00094  | 0.001941 |
| PPP2R5B   | 2766  | 722.5  | 2982.5 | 7.562022 | 31.92247 | 2.077729 | Up | 8.86E-14 | 3.21E-13 |
| ITPR1     | 10197 | 340.5  | 1406.5 | 0.967846 | 4.082355 | 2.076552 | Up | 1.85E-13 | 6.59E-13 |
| GREM2     | 4199  | 13     | 54     | 0.090274 | 0.380478 | 2.075434 | Up | 5.35E-07 | 1.34E-06 |
| ADM2      | 4246  | 6      | 24     | 0.039998 | 0.168203 | 2.072211 | Up | 0.000894 | 0.00185  |
| GLUL      | 4083  | 5      | 21     | 0.036442 | 0.152966 | 2.069532 | Up | 0.001541 | 0.003129 |
| RIMKLA    | 10583 | 38     | 162    | 0.107851 | 0.451262 | 2.064928 | Up | 1.45E-13 | 5.21E-13 |
| WNT5B     | 2184  | 293    | 1202.5 | 3.898403 | 16.31024 | 2.064823 | Up | 5.51E-13 | 1.90E-12 |
| NOS3      | 2040  | 13.5   | 56     | 0.194345 | 0.811506 | 2.061984 | Up | 3.63E-07 | 9.15E-07 |
| LOC653125 | 2000  | 14     | 56.5   | 0.202917 | 0.839619 | 2.048843 | Up | 4.07E-07 | 1.02E-06 |
| S1PR1     | 3050  | 21     | 86     | 0.202789 | 0.837122 | 2.045461 | Up | 1.78E-09 | 4.94E-09 |
| RIOK3     | 4035  | 2309.5 | 9282   | 16.56101 | 68.21851 | 2.042372 | Up | 0        | 0        |
| CSPG5     | 2334  | 35     | 142    | 0.436419 | 1.794011 | 2.039402 | Up | 3.77E-13 | 1.32E-12 |
| ALS2CL    | 4938  | 13     | 53     | 0.077693 | 0.31797  | 2.033029 | Up | 7.07E-07 | 1.76E-06 |
| RNF144B   | 5036  | 18.5   | 75     | 0.107816 | 0.440692 | 2.031199 | Up | 1.25E-08 | 3.36E-08 |
| GPT2      | 3963  | 1782   | 7115   | 13.07659 | 53.16057 | 2.02337  | Up | 0        | 0        |
| METTL21B  | 2717  | 253    | 1008.5 | 2.704826 | 10.97855 | 2.02108  | Up | 3.97E-13 | 1.39E-12 |

|              |       |        |        |          |          |          |    |          |          |
|--------------|-------|--------|--------|----------|----------|----------|----|----------|----------|
| BRSK2        | 3506  | 40     | 159    | 0.331662 | 1.341485 | 2.016047 | Up | 1.16E-13 | 4.18E-13 |
| C4orf3       | 2975  | 3020.5 | 11897  | 29.44205 | 118.6543 | 2.010815 | Up | 0        | 0        |
| CSTA         | 838   | 6      | 24     | 0.213617 | 0.855674 | 2.002037 | Up | 0.000894 | 0.00185  |
| SLC29A4      | 2910  | 338    | 1323.5 | 3.383236 | 13.42823 | 1.988793 | Up | 1.46E-13 | 5.22E-13 |
| FAM78B       | 1481  | 5.5    | 22.5   | 0.112219 | 0.441826 | 1.977158 | Up | 0.00094  | 0.001941 |
| MME          | 5710  | 1357   | 5221   | 6.892941 | 27.11199 | 1.97574  | Up | 4.05E-12 | 1.31E-11 |
| ACHE         | 2978  | 25     | 97.5   | 0.245197 | 0.964245 | 1.975459 | Up | 1.51E-10 | 4.37E-10 |
| BLNK         | 1760  | 5      | 20     | 0.085845 | 0.33599  | 1.968604 | Up | 0.002522 | 0.005021 |
| TMEM45A      | 1564  | 1644.5 | 6286   | 30.50148 | 119.2405 | 1.966923 | Up | 5.77E-12 | 1.83E-11 |
| LOC100288336 | 2001  | 6      | 23     | 0.088314 | 0.341032 | 1.949199 | Up | 0.001447 | 0.002943 |
| HSPA6        | 2664  | 18     | 69     | 0.199004 | 0.764176 | 1.941106 | Up | 3.21E-08 | 8.49E-08 |
| KIAA1199     | 7080  | 2192   | 8214.5 | 8.99474  | 34.355   | 1.933366 | Up | 0        | 0        |
| MYO1E        | 4729  | 1268.5 | 4733   | 7.767526 | 29.66316 | 1.933145 | Up | 2.55E-12 | 8.39E-12 |
| KRT17        | 1574  | 14     | 51.5   | 0.256378 | 0.970436 | 1.920358 | Up | 2.96E-06 | 7.14E-06 |
| PDK3         | 12795 | 1071.5 | 3963   | 2.436458 | 9.187164 | 1.914834 | Up | 1.09E-12 | 3.70E-12 |
| CTAGE6P      | 2675  | 7      | 27     | 0.079074 | 0.296749 | 1.907965 | Up | 0.000518 | 0.001091 |
| C7orf63      | 3855  | 39     | 145    | 0.296774 | 1.112772 | 1.906723 | Up | 1.33E-13 | 4.78E-13 |
| CHST5        | 3265  | 8.5    | 31.5   | 0.076207 | 0.284742 | 1.90165  | Up | 0.000187 | 0.000407 |
| SYTL3        | 2284  | 42     | 154    | 0.53356  | 1.988064 | 1.897642 | Up | 1.10E-13 | 3.98E-13 |
| P4HA2        | 2588  | 5963.5 | 21717  | 66.85989 | 248.6624 | 1.894975 | Up | 3.03E-11 | 9.07E-11 |
| FOXC2        | 1683  | 47     | 168.5  | 0.797505 | 2.962076 | 1.893043 | Up | 0        | 0        |
| LOC100652961 | 981   | 6      | 22     | 0.180138 | 0.668328 | 1.891451 | Up | 0.002332 | 0.004657 |
| SYNGR3       | 2076  | 199.5  | 726    | 2.789998 | 10.33843 | 1.889681 | Up | 3.57E-14 | 1.32E-13 |
| RSPO2        | 3149  | 18     | 68     | 0.172727 | 0.638659 | 1.886553 | Up | 4.46E-08 | 1.17E-07 |
| FAM116B      | 2029  | 38.5   | 139.5  | 0.550188 | 2.032989 | 1.885605 | Up | 1.52E-13 | 5.43E-13 |



|          |      |          |          |          |          |          |    |          |          |
|----------|------|----------|----------|----------|----------|----------|----|----------|----------|
| TMEM191C | 1325 | 24.5     | 88.5     | 0.536225 | 1.97721  | 1.882557 | Up | 8.15E-10 | 2.30E-09 |
| P4HA1    | 2860 | 10116.5  | 36410    | 102.4575 | 377.5509 | 1.881645 | Up | 1.48E-11 | 4.55E-11 |
| IZUMO4   | 966  | 26       | 94       | 0.784802 | 2.876687 | 1.874007 | Up | 2.68E-10 | 7.68E-10 |
| MBP      | 2189 | 36.5     | 136      | 0.492325 | 1.802833 | 1.872584 | Up | 2.61E-13 | 9.21E-13 |
| TIMP3    | 5496 | 4698.5   | 16762    | 24.79439 | 90.38589 | 1.866084 | Up | 7.09E-12 | 2.23E-11 |
| RGS7BP   | 3821 | 5        | 19       | 0.039541 | 0.14382  | 1.862824 | Up | 0.004105 | 0.008016 |
| SHANK3   | 7145 | 52.5     | 187.5    | 0.213361 | 0.775829 | 1.862445 | Up | 5.13E-14 | 1.88E-13 |
| NIM1     | 2326 | 74       | 272      | 0.951485 | 3.457917 | 1.861651 | Up | 9.99E-15 | 3.74E-14 |
| ADAM8    | 3149 | 57       | 201.5    | 0.521461 | 1.892787 | 1.85988  | Up | 5.37E-14 | 1.96E-13 |
| PKIA     | 4215 | 349      | 1230     | 2.387666 | 8.656826 | 1.858237 | Up | 2.05E-13 | 7.29E-13 |
| WDR54    | 1223 | 270      | 952.5    | 6.384939 | 23.08592 | 1.854268 | Up | 4.53E-13 | 1.58E-12 |
| GBE1     | 3118 | 3063.5   | 10792    | 28.45328 | 102.6302 | 1.850789 | Up | 0        | 0        |
| UNC5A    | 3749 | 6        | 22       | 0.047749 | 0.172018 | 1.849015 | Up | 0.002332 | 0.004658 |
| FAM84A   | 6366 | 112.5    | 395      | 0.513097 | 1.845217 | 1.846487 | Up | 0        | 0        |
| FBXL16   | 3543 | 18       | 63.5     | 0.147689 | 0.530901 | 1.84588  | Up | 3.43E-07 | 8.64E-07 |
| KDM3A    | 4907 | 1015     | 3560.5   | 5.993441 | 21.48887 | 1.842133 | Up | 1.25E-12 | 4.22E-12 |
| EPB49    | 2561 | 26       | 93.5     | 0.300505 | 1.074398 | 1.838068 | Up | 3.83E-10 | 1.09E-09 |
| EGR3     | 3912 | 19       | 68       | 0.143243 | 0.511167 | 1.835334 | Up | 8.44E-08 | 2.19E-07 |
| KCNMB4   | 1631 | 7        | 25       | 0.126875 | 0.451231 | 1.830455 | Up | 0.001328 | 0.002711 |
| CKB      | 1431 | 24       | 84       | 0.490757 | 1.744799 | 1.82998  | Up | 3.75E-09 | 1.03E-08 |
| AQP4     | 5136 | 7        | 25       | 0.041184 | 0.145524 | 1.821082 | Up | 0.001328 | 0.002711 |
| ROPN1L   | 974  | 26       | 90.5     | 0.776    | 2.739573 | 1.819823 | Up | 1.28E-09 | 3.58E-09 |
| MEX3B    | 3398 | 57       | 197      | 0.486626 | 1.716837 | 1.818867 | Up | 5.37E-14 | 1.96E-13 |
| PPP1R15A | 2399 | 2559.5   | 8835.5   | 30.99948 | 109.2046 | 1.816718 | Up | 0        | 0        |
| FN1      | 8815 | 198474.5 | 679284.5 | 651.1983 | 2281.398 | 1.80875  | Up | 7.48E-10 | 2.11E-09 |

|          |      |        |         |          |          |          |    |          |          |
|----------|------|--------|---------|----------|----------|----------|----|----------|----------|
| ITGB3    | 4894 | 686.5  | 2358    | 4.080477 | 14.27582 | 1.806764 | Up | 0        | 0        |
| GJA3     | 5219 | 117.5  | 400.5   | 0.651734 | 2.277936 | 1.805372 | Up | 1.22E-13 | 4.41E-13 |
| ANXA8L1  | 1954 | 57     | 194     | 0.845067 | 2.944466 | 1.800868 | Up | 5.37E-14 | 1.96E-13 |
| PCOLCE2  | 2047 | 11     | 39      | 0.16126  | 0.560139 | 1.796398 | Up | 5.79E-05 | 0.00013  |
| FLNB     | 9434 | 5883   | 19949.5 | 18.03667 | 62.62274 | 1.795753 | Up | 1.29E-11 | 3.98E-11 |
| BTG2     | 2718 | 727    | 2458.5  | 7.752351 | 26.82963 | 1.791121 | Up | 1.35E-12 | 4.52E-12 |
| CHD5     | 9663 | 17     | 60      | 0.052449 | 0.181293 | 1.78934  | Up | 5.88E-07 | 1.47E-06 |
| GADD45A  | 1296 | 2594.5 | 8770    | 58.10563 | 200.8427 | 1.789316 | Up | 0        | 0        |
| SERTAD1  | 1213 | 404.5  | 1371    | 9.685058 | 33.43439 | 1.7875   | Up | 2.91E-13 | 1.02E-12 |
| CSRP2    | 901  | 182.5  | 618     | 5.896516 | 20.35077 | 1.787148 | Up | 0        | 0        |
| PSTPIP2  | 3054 | 48.5   | 162.5   | 0.457713 | 1.576457 | 1.784172 | Up | 1.06E-13 | 3.85E-13 |
| VSIG1    | 3236 | 31     | 107     | 0.283094 | 0.974931 | 1.78402  | Up | 3.83E-11 | 1.14E-10 |
| GNRH1    | 2166 | 18     | 60      | 0.238402 | 0.820356 | 1.782855 | Up | 1.28E-06 | 3.14E-06 |
| TMEM47   | 4068 | 736    | 2476.5  | 5.250752 | 18.06769 | 1.782816 | Up | 1.22E-12 | 4.12E-12 |
| PTPRR    | 2650 | 47     | 159     | 0.518615 | 1.775351 | 1.775369 | Up | 0        | 0        |
| FUT11    | 2069 | 772.5  | 2583.5  | 10.82976 | 36.99912 | 1.772489 | Up | 2.51E-12 | 8.27E-12 |
| ERRFI1   | 3144 | 6672.5 | 22222   | 61.5234  | 209.5265 | 1.767926 | Up | 1.54E-11 | 4.72E-11 |
| CPA4     | 2817 | 1740.5 | 5808    | 18.00332 | 61.04586 | 1.76163  | Up | 4.74E-12 | 1.52E-11 |
| HMGA2    | 4150 | 2625   | 8668.5  | 18.30812 | 61.90356 | 1.757539 | Up | 0        | 0        |
| TLE6     | 1955 | 22     | 75      | 0.335349 | 1.132275 | 1.755488 | Up | 3.99E-08 | 1.05E-07 |
| CDC42BPG | 4945 | 8.5    | 29      | 0.051477 | 0.173672 | 1.754357 | Up | 0.000477 | 0.001009 |
| WDR52    | 3281 | 227.5  | 759.5   | 2.032646 | 6.855766 | 1.753959 | Up | 3.55E-15 | 1.35E-14 |
| MFAP2    | 1121 | 8      | 26      | 0.203364 | 0.684873 | 1.751771 | Up | 0.001883 | 0.003792 |
| SYT8     | 1423 | 19.5   | 64      | 0.395539 | 1.332006 | 1.751709 | Up | 4.81E-07 | 1.20E-06 |
| RRAD     | 1476 | 577.5  | 1900    | 11.34095 | 38.07666 | 1.747365 | Up | 5.81E-13 | 2.00E-12 |

|           |      |        |        |          |          |          |    |          |          |
|-----------|------|--------|--------|----------|----------|----------|----|----------|----------|
| HYAL3     | 1855 | 213    | 701    | 3.342304 | 11.17261 | 1.741051 | Up | 2.80E-13 | 9.85E-13 |
| FOXH1     | 2193 | 57     | 187.5  | 0.755062 | 2.521522 | 1.739628 | Up | 5.37E-14 | 1.96E-13 |
| NR1D1     | 2788 | 421.5  | 1381   | 4.394726 | 14.67447 | 1.739464 | Up | 4.13E-13 | 1.44E-12 |
| ADAMTS6   | 7289 | 349    | 1138.5 | 1.394408 | 4.630425 | 1.731492 | Up | 2.05E-13 | 7.28E-13 |
| DDX41     | 2118 | 3111.5 | 10085  | 42.69132 | 140.9543 | 1.723213 | Up | 0        | 0        |
| TPD52     | 4250 | 138    | 440.5  | 0.933665 | 3.078448 | 1.721226 | Up | 1.83E-13 | 6.53E-13 |
| MEGF6     | 7450 | 59     | 190.5  | 0.230066 | 0.757731 | 1.719639 | Up | 2.53E-14 | 9.36E-14 |
| LOC401097 | 2606 | 40     | 129.5  | 0.448845 | 1.474072 | 1.715517 | Up | 2.75E-12 | 9.00E-12 |
| SRD5A3    | 4089 | 419.5  | 1352   | 2.984198 | 9.793531 | 1.714486 | Up | 0        | 0        |
| ACPL2     | 3024 | 178.5  | 581    | 1.732832 | 5.68453  | 1.713909 | Up | 1.14E-13 | 4.11E-13 |
| ATP2B2    | 8962 | 26     | 88     | 0.087153 | 0.28464  | 1.707511 | Up | 3.02E-09 | 8.30E-09 |
| TNFAIP3   | 4446 | 558    | 1785   | 3.646674 | 11.89368 | 1.705542 | Up | 1.47E-13 | 5.27E-13 |
| RUNX1     | 7274 | 1432.5 | 4574   | 5.720887 | 18.63617 | 1.703795 | Up | 2.95E-12 | 9.65E-12 |
| GCNT1     | 5606 | 429    | 1366   | 2.220709 | 7.223136 | 1.701605 | Up | 0        | 0        |
| NEK11     | 2793 | 92     | 297    | 0.969881 | 3.152723 | 1.700719 | Up | 6.66E-15 | 2.50E-14 |
| KIAA1715  | 5765 | 2372.5 | 7507.5 | 11.91552 | 38.62849 | 1.696823 | Up | 0        | 0        |
| ZNF470    | 7149 | 276    | 878.5  | 1.122626 | 3.635974 | 1.695464 | Up | 7.04E-14 | 2.56E-13 |
| MLANA     | 1524 | 9.5    | 30.5   | 0.180835 | 0.584474 | 1.692464 | Up | 0.000682 | 0.001425 |
| SLC25A4   | 4420 | 244    | 774.5  | 1.606076 | 5.186271 | 1.691158 | Up | 2.85E-13 | 1.00E-12 |
| EDN1      | 2112 | 192    | 612    | 2.654694 | 8.572218 | 1.691123 | Up | 0        | 0        |
| PRPH      | 1833 | 8      | 25     | 0.125623 | 0.404628 | 1.6875   | Up | 0.00294  | 0.005823 |
| VKORC1    | 1042 | 3305.5 | 10424  | 92.26282 | 295.945  | 1.681508 | Up | 0        | 0        |
| ARID3A    | 2823 | 235    | 742    | 2.427255 | 7.783417 | 1.681078 | Up | 3.29E-13 | 1.16E-12 |
| KLF5      | 3350 | 114    | 360.5  | 0.994048 | 3.186379 | 1.68053  | Up | 7.79E-14 | 2.83E-13 |
| FANK1     | 1395 | 63     | 199.5  | 1.325184 | 4.232239 | 1.675229 | Up | 0        | 0        |

|           |       |       |          |          |          |          |    |          |          |
|-----------|-------|-------|----------|----------|----------|----------|----|----------|----------|
| PRR5      | 1878  | 19    | 60.5     | 0.299606 | 0.956529 | 1.674743 | Up | 2.74E-06 | 6.62E-06 |
| C17orf103 | 4787  | 457   | 1428     | 2.774997 | 8.836523 | 1.670993 | Up | 1.73E-12 | 5.76E-12 |
| DUOX2     | 6428  | 24.5  | 79       | 0.113566 | 0.361475 | 1.670362 | Up | 3.25E-08 | 8.57E-08 |
| ABTB2     | 4919  | 603   | 1876     | 3.562657 | 11.29701 | 1.664915 | Up | 7.03E-13 | 2.41E-12 |
| SGK1      | 2638  | 303.5 | 943      | 3.341238 | 10.58728 | 1.663878 | Up | 2.56E-13 | 9.05E-13 |
| LDHA      | 2102  | 42700 | 131974.5 | 589.0682 | 1861.316 | 1.659816 | Up | 1.02E-10 | 2.98E-10 |
| AMPD3     | 4371  | 465   | 1437.5   | 3.085219 | 9.748241 | 1.659769 | Up | 0        | 0        |
| GLTP      | 2371  | 1489  | 4604.5   | 18.23781 | 57.58438 | 1.658745 | Up | 5.61E-12 | 1.78E-11 |
| FOXL1     | 3207  | 159   | 491      | 1.445206 | 4.539547 | 1.651273 | Up | 8.53E-14 | 3.09E-13 |
| C17orf76  | 2669  | 38.5  | 119      | 0.420408 | 1.319593 | 1.650231 | Up | 4.21E-11 | 1.25E-10 |
| BCL11A    | 5946  | 9     | 29       | 0.044966 | 0.141064 | 1.649436 | Up | 0.001068 | 0.002195 |
| IL21R     | 4865  | 56.5  | 175      | 0.339613 | 1.064816 | 1.648641 | Up | 1.69E-14 | 6.27E-14 |
| PLGLB1    | 3011  | 8.5   | 26.5     | 0.083398 | 0.261209 | 1.647112 | Up | 0.001883 | 0.003792 |
| VGLL3     | 10396 | 265.5 | 813.5    | 0.742799 | 2.321985 | 1.644314 | Up | 6.59E-13 | 2.26E-12 |
| UNC5B     | 4998  | 639   | 1961     | 3.716882 | 11.61047 | 1.643262 | Up | 7.17E-13 | 2.46E-12 |
| ACER2     | 2852  | 125.5 | 384      | 1.27418  | 3.980083 | 1.64323  | Up | 3.11E-15 | 1.18E-14 |
| CACNA1B   | 9790  | 71    | 228.5    | 0.219147 | 0.683985 | 1.642065 | Up | 0        | 0        |
| TMEM236   | 5464  | 9     | 28       | 0.048513 | 0.151358 | 1.641529 | Up | 0.001661 | 0.00336  |
| EFNB2     | 4404  | 1862  | 5681     | 12.26343 | 38.25576 | 1.641314 | Up | 1.92E-13 | 6.84E-13 |
| CYFIP2    | 6791  | 416   | 1275     | 1.785835 | 5.563145 | 1.639302 | Up | 0        | 0        |
| ZNF175    | 3788  | 778.5 | 2377     | 5.972454 | 18.60286 | 1.639129 | Up | 0        | 0        |
| ZDHHC9    | 4619  | 2358  | 7200     | 14.8269  | 46.15818 | 1.638369 | Up | 0        | 0        |
| TEX9      | 1470  | 14    | 42.5     | 0.276859 | 0.86104  | 1.636931 | Up | 0.000154 | 0.000337 |
| ADARB1    | 7044  | 389.5 | 1187.5   | 1.610456 | 4.99115  | 1.631903 | Up | 0        | 0        |
| ABL2      | 12244 | 2997  | 9068.5   | 7.097593 | 21.97334 | 1.630352 | Up | 0        | 0        |

|          |       |        |         |          |          |          |    |          |          |
|----------|-------|--------|---------|----------|----------|----------|----|----------|----------|
| DUSP5    | 2545  | 446.5  | 1349    | 5.092687 | 15.68719 | 1.623088 | Up | 0        | 0        |
| SNX33    | 3250  | 986    | 2975    | 8.809904 | 27.09689 | 1.620929 | Up | 0        | 0        |
| JHDM1D   | 9178  | 362    | 1087    | 1.144214 | 3.517523 | 1.620203 | Up | 1.14E-12 | 3.85E-12 |
| VGf      | 2586  | 9      | 27      | 0.100729 | 0.308069 | 1.612781 | Up | 0.002566 | 0.005104 |
| MRAP     | 656   | 12     | 36.5    | 0.538768 | 1.645285 | 1.610603 | Up | 0.00047  | 0.000995 |
| PPM1D    | 4790  | 766.5  | 2287    | 4.658179 | 14.17395 | 1.605404 | Up | 1.15E-12 | 3.89E-12 |
| CPM      | 6683  | 54     | 163     | 0.237468 | 0.720432 | 1.601127 | Up | 8.02E-14 | 2.91E-13 |
| ETS2     | 3672  | 925.5  | 2741.5  | 7.31707  | 22.09782 | 1.594566 | Up | 8.96E-13 | 3.05E-12 |
| PPP1R16A | 2326  | 1063   | 3149    | 13.26506 | 40.03087 | 1.593482 | Up | 2.25E-12 | 7.45E-12 |
| PTPN14   | 13443 | 8842   | 26070   | 19.07007 | 57.49401 | 1.592101 | Up | 0        | 0        |
| RGS4     | 3055  | 796    | 2345.5  | 7.553758 | 22.71469 | 1.588359 | Up | 3.24E-13 | 1.14E-12 |
| ZBTB16   | 2262  | 7.5    | 23      | 0.099176 | 0.297885 | 1.586688 | Up | 0.003336 | 0.006581 |
| MAP2K1   | 2603  | 2729.5 | 8030    | 30.44036 | 91.40635 | 1.586309 | Up | 0        | 0        |
| GCKR     | 2197  | 58     | 171     | 0.770575 | 2.307207 | 1.58214  | Up | 4.00E-14 | 1.47E-13 |
| SPOCK1   | 4841  | 189    | 565     | 1.151772 | 3.447346 | 1.581631 | Up | 2.87E-13 | 1.01E-12 |
| BIRC3    | 5243  | 1910.5 | 5583.5  | 10.56827 | 31.60266 | 1.580307 | Up | 4.45E-12 | 1.43E-11 |
| IL11     | 2354  | 48     | 140     | 0.586915 | 1.753891 | 1.579336 | Up | 8.37E-12 | 2.62E-11 |
| DDB2     | 1870  | 1436.5 | 4190.5  | 22.23943 | 66.37265 | 1.577469 | Up | 2.22E-12 | 7.35E-12 |
| STBD1    | 2468  | 500.5  | 1462.5  | 5.888563 | 17.56678 | 1.576863 | Up | 5.05E-13 | 1.75E-12 |
| SLC35E1  | 5109  | 3894   | 11349.5 | 22.10673 | 65.76174 | 1.572763 | Up | 1.33E-11 | 4.09E-11 |
| MN1      | 7569  | 625    | 1823.5  | 2.399822 | 7.136727 | 1.572335 | Up | 0        | 0        |
| JAG2     | 4963  | 83     | 241.5   | 0.485469 | 1.438255 | 1.56687  | Up | 1.43E-13 | 5.12E-13 |
| OSMR     | 5556  | 8073   | 23395.5 | 42.15474 | 124.7666 | 1.565466 | Up | 0        | 0        |
| VSTM2L   | 2018  | 287.5  | 829.5   | 4.120806 | 12.17538 | 1.562968 | Up | 4.35E-13 | 1.51E-12 |
| SYT7     | 4609  | 11     | 32.5    | 0.070376 | 0.20752  | 1.560099 | Up | 0.001261 | 0.002579 |

|           |       |       |        |          |          |          |    |          |          |
|-----------|-------|-------|--------|----------|----------|----------|----|----------|----------|
| SLC2A5    | 2454  | 27    | 79     | 0.322181 | 0.949181 | 1.558813 | Up | 2.88E-07 | 7.28E-07 |
| ECSCR     | 1027  | 8.5   | 24.5   | 0.240041 | 0.705315 | 1.554984 | Up | 0.004557 | 0.008857 |
| ZCCHC5    | 2648  | 48    | 142    | 0.539085 | 1.578033 | 1.549544 | Up | 3.77E-12 | 1.22E-11 |
| MAMDC4    | 3669  | 281   | 806    | 2.223599 | 6.499666 | 1.547469 | Up | 0        | 0        |
| NR1I2     | 4446  | 9     | 27     | 0.061169 | 0.17806  | 1.541487 | Up | 0.002566 | 0.005104 |
| SLC30A3   | 2108  | 29    | 83.5   | 0.40482  | 1.173509 | 1.535475 | Up | 2.20E-07 | 5.60E-07 |
| EFCAB4A   | 1838  | 176   | 497    | 2.772412 | 8.00114  | 1.529064 | Up | 0        | 0        |
| CAMK1D    | 2242  | 167   | 474    | 2.174051 | 6.270634 | 1.528226 | Up | 1.94E-13 | 6.91E-13 |
| LDLRAD3   | 2969  | 40    | 114    | 0.393968 | 1.134173 | 1.52549  | Up | 1.33E-09 | 3.71E-09 |
| IGFBP2    | 1439  | 12.5  | 36.5   | 0.259298 | 0.745066 | 1.522755 | Up | 0.00047  | 0.000995 |
| PLXNA2    | 11457 | 838.5 | 2380.5 | 2.138816 | 6.145336 | 1.52268  | Up | 0        | 0        |
| ANXA8     | 2070  | 118   | 333.5  | 1.658248 | 4.763194 | 1.52227  | Up | 0        | 0        |
| PTPRU     | 5614  | 616.5 | 1741   | 3.199178 | 9.181663 | 1.521054 | Up | 5.19E-13 | 1.80E-12 |
| KCP       | 2774  | 16    | 46     | 0.171809 | 0.492001 | 1.51786  | Up | 0.000117 | 0.000258 |
| GPER      | 2981  | 30.5  | 86     | 0.298393 | 0.851216 | 1.512314 | Up | 1.28E-07 | 3.30E-07 |
| HOXB7     | 1377  | 9.5   | 26.5   | 0.20014  | 0.570649 | 1.511594 | Up | 0.003936 | 0.007702 |
| CSRNP1    | 3188  | 555.5 | 1553   | 5.07313  | 14.41213 | 1.506335 | Up | 0        | 0        |
| MPI       | 1771  | 473   | 1311   | 7.756951 | 21.93791 | 1.499864 | Up | 5.88E-13 | 2.03E-12 |
| PTX3      | 1955  | 702   | 1936   | 10.4109  | 29.39238 | 1.497347 | Up | 0        | 0        |
| KIAA1467  | 4725  | 361.5 | 1002   | 2.224219 | 6.274075 | 1.496104 | Up | 0        | 0        |
| GDNF      | 3830  | 16    | 46     | 0.126235 | 0.355974 | 1.495655 | Up | 0.000117 | 0.000258 |
| SH2D4A    | 3266  | 572.5 | 1581.5 | 5.088179 | 14.33632 | 1.494453 | Up | 0        | 0        |
| JAKMIP1   | 3011  | 11    | 32     | 0.110393 | 0.310712 | 1.492929 | Up | 0.001261 | 0.002579 |
| AP3B2     | 3746  | 10    | 28     | 0.078216 | 0.22001  | 1.492037 | Up | 0.003379 | 0.006663 |
| TNFAIP8L3 | 2292  | 27    | 73     | 0.33494  | 0.941179 | 1.490567 | Up | 3.18E-06 | 7.66E-06 |

|          |       |        |         |          |          |          |    |          |          |
|----------|-------|--------|---------|----------|----------|----------|----|----------|----------|
| KCTD16   | 5183  | 106    | 296.5   | 0.603826 | 1.691721 | 1.486287 | Up | 0        | 0        |
| F3       | 2233  | 16417  | 45003.5 | 213.1773 | 597.066  | 1.485837 | Up | 0        | 0        |
| FAM57A   | 2096  | 885    | 2433.5  | 12.28149 | 34.39629 | 1.485768 | Up | 0        | 0        |
| FAM13A   | 5858  | 1375   | 3755.5  | 6.790881 | 18.99671 | 1.484079 | Up | 6.17E-12 | 1.95E-11 |
| BEX2     | 1097  | 15     | 41.5    | 0.400633 | 1.120266 | 1.483488 | Up | 0.00046  | 0.000974 |
| MRO      | 5006  | 10     | 28      | 0.058529 | 0.163633 | 1.483239 | Up | 0.003379 | 0.006664 |
| ADAMTS1  | 4670  | 1434.5 | 3930.5  | 8.926016 | 24.91694 | 1.481039 | Up | 0        | 0        |
| C1QL4    | 2065  | 17     | 46      | 0.23654  | 0.658846 | 1.477856 | Up | 0.000227 | 0.00049  |
| OLFML2A  | 6556  | 240.5  | 659     | 1.068946 | 2.974327 | 1.476375 | Up | 0        | 0        |
| SPRY3    | 9038  | 129.5  | 352.5   | 0.41583  | 1.155216 | 1.474096 | Up | 0        | 0        |
| RAB20    | 1530  | 720.5  | 1958    | 13.66895 | 37.8816  | 1.470595 | Up | 0        | 0        |
| IGF1R    | 11242 | 1274.5 | 3468    | 3.300109 | 9.145097 | 1.470485 | Up | 3.25E-12 | 1.06E-11 |
| UAP1     | 2344  | 2823.5 | 7637    | 34.87076 | 96.59776 | 1.469972 | Up | 0        | 0        |
| PIAS2    | 2360  | 458.5  | 1243.5  | 5.640203 | 15.60697 | 1.468372 | Up | 1.74E-12 | 5.78E-12 |
| ITGB4    | 5925  | 38.5   | 106     | 0.190153 | 0.526017 | 1.467945 | Up | 8.60E-09 | 2.32E-08 |
| IKBIP    | 1246  | 3624   | 9815    | 84.45589 | 233.5667 | 1.467564 | Up | 0        | 0        |
| P2RY1    | 3122  | 52     | 141     | 0.484927 | 1.337437 | 1.46363  | Up | 7.60E-11 | 2.23E-10 |
| DTNA     | 1763  | 86     | 237     | 1.441487 | 3.970931 | 1.461919 | Up | 0        | 0        |
| PAM      | 5035  | 6740   | 18178   | 38.8458  | 106.9767 | 1.461466 | Up | 2.70E-11 | 8.12E-11 |
| HBEGF    | 2381  | 684    | 1847    | 8.363636 | 23.03235 | 1.461459 | Up | 0        | 0        |
| CPEB1    | 3202  | 16     | 44.5    | 0.148844 | 0.409559 | 1.460273 | Up | 0.000264 | 0.000568 |
| ANKRD13A | 3917  | 1374   | 3701    | 10.1802  | 28.00137 | 1.459732 | Up | 4.59E-12 | 1.47E-11 |
| PODXL    | 5911  | 383    | 1034    | 1.896785 | 5.175559 | 1.448159 | Up | 1.49E-13 | 5.35E-13 |
| KLF4     | 2949  | 495.5  | 1327    | 4.886596 | 13.31021 | 1.445632 | Up | 4.63E-13 | 1.61E-12 |
| NAV2     | 7859  | 441.5  | 1197.5  | 1.654336 | 4.503434 | 1.444773 | Up | 3.59E-13 | 1.26E-12 |

|              |       |        |        |          |          |          |    |          |          |
|--------------|-------|--------|--------|----------|----------|----------|----|----------|----------|
| PDZD7        | 2072  | 49.5   | 132.5  | 0.695869 | 1.892741 | 1.443589 | Up | 3.73E-10 | 1.06E-09 |
| DDIT3        | 924   | 317    | 843    | 9.960783 | 27.04127 | 1.440832 | Up | 2.57E-13 | 9.08E-13 |
| DNAJB2       | 3129  | 1287.5 | 3426   | 11.95187 | 32.44601 | 1.440804 | Up | 7.41E-12 | 2.33E-11 |
| BOC          | 4293  | 314.5  | 844.5  | 2.143409 | 5.810469 | 1.438747 | Up | 1.32E-13 | 4.74E-13 |
| GLT25D2      | 5182  | 21.5   | 59     | 0.123822 | 0.335105 | 1.436345 | Up | 1.69E-05 | 3.92E-05 |
| GPRC5A       | 2856  | 1334   | 3547   | 13.59998 | 36.79089 | 1.435744 | Up | 1.66E-12 | 5.53E-12 |
| INPP5D       | 4925  | 104    | 276    | 0.613867 | 1.658209 | 1.433628 | Up | 0        | 0        |
| ZNF404       | 1868  | 58     | 154.5  | 0.905063 | 2.442759 | 1.432421 | Up | 2.15E-11 | 6.52E-11 |
| CEACAM1      | 3333  | 69     | 184    | 0.607665 | 1.634072 | 1.427124 | Up | 1.57E-13 | 5.63E-13 |
| CRYBG3       | 10748 | 1385.5 | 3647.5 | 3.741228 | 10.05845 | 1.426824 | Up | 7.00E-12 | 2.20E-11 |
| C1orf88      | 2346  | 33     | 86     | 0.407448 | 1.090161 | 1.419854 | Up | 8.68E-07 | 2.15E-06 |
| PRELID2      | 2339  | 206    | 537.5  | 2.549469 | 6.820584 | 1.419699 | Up | 2.46E-13 | 8.70E-13 |
| LOC728047    | 1997  | 121    | 314    | 1.752193 | 4.663133 | 1.412138 | Up | 0        | 0        |
| HOXA4        | 1728  | 278.5  | 728.5  | 4.701476 | 12.47723 | 1.408112 | Up | 1.88E-13 | 6.69E-13 |
| CCDC80       | 4578  | 4049   | 10529  | 25.69197 | 68.15781 | 1.407562 | Up | 2.10E-11 | 6.38E-11 |
| LOC100652910 | 1785  | 33.5   | 87     | 0.543324 | 1.439763 | 1.405946 | Up | 5.93E-07 | 1.48E-06 |
| PLAC8        | 1403  | 332    | 857    | 6.854502 | 18.1482  | 1.404702 | Up | 0        | 0        |
| FOS          | 2158  | 101.5  | 262.5  | 1.359584 | 3.59581  | 1.403152 | Up | 0        | 0        |
| SERPING1     | 1832  | 34     | 92     | 0.560807 | 1.482155 | 1.40212  | Up | 1.61E-07 | 4.11E-07 |
| THSD1        | 3366  | 64.5   | 167    | 0.55756  | 1.468999 | 1.397636 | Up | 5.90E-12 | 1.87E-11 |
| MAGED4B      | 2588  | 168    | 432.5  | 1.879108 | 4.944708 | 1.395838 | Up | 1.69E-13 | 6.03E-13 |
| SERTAD2      | 5565  | 1542.5 | 3956   | 8.042268 | 21.08654 | 1.390648 | Up | 3.47E-12 | 1.13E-11 |
| TGFBR1       | 6244  | 853.5  | 2186.5 | 3.96803  | 10.38971 | 1.388661 | Up | 9.86E-13 | 3.35E-12 |
| PRDM6        | 3027  | 68     | 175.5  | 0.656837 | 1.718043 | 1.38716  | Up | 3.22E-12 | 1.05E-11 |
| SHROOM2      | 7445  | 28     | 74     | 0.112413 | 0.29325  | 1.383323 | Up | 4.03E-06 | 9.66E-06 |



|           |       |        |         |          |          |          |    |          |          |
|-----------|-------|--------|---------|----------|----------|----------|----|----------|----------|
| PLXNB3    | 6377  | 2562   | 6569.5  | 11.6838  | 30.46217 | 1.38251  | Up | 0        | 0        |
| YEATS2    | 6524  | 1914.5 | 4885.5  | 8.513631 | 22.17624 | 1.381169 | Up | 4.86E-12 | 1.56E-11 |
| MYADM     | 3141  | 1906.5 | 4866    | 17.66322 | 45.84003 | 1.375859 | Up | 2.27E-12 | 7.51E-12 |
| PLXNA3    | 6763  | 4227   | 10770.5 | 18.16327 | 47.07707 | 1.374    | Up | 1.88E-11 | 5.72E-11 |
| ADAP1     | 2338  | 55     | 139     | 0.680422 | 1.757503 | 1.369026 | Up | 9.81E-10 | 2.75E-09 |
| LOC653720 | 725   | 30.5   | 77      | 1.223743 | 3.160668 | 1.36893  | Up | 4.31E-06 | 1.03E-05 |
| ZNF667    | 3877  | 37.5   | 95      | 0.281327 | 0.725328 | 1.366386 | Up | 3.19E-07 | 8.06E-07 |
| B4GALT7   | 1747  | 1662   | 4199.5  | 27.6032  | 71.10785 | 1.365173 | Up | 6.43E-12 | 2.03E-11 |
| MAGED4    | 2495  | 40     | 101.5   | 0.467894 | 1.205025 | 1.364809 | Up | 1.99E-07 | 5.08E-07 |
| CCNG2     | 5489  | 878    | 2210.5  | 4.64619  | 11.94526 | 1.362318 | Up | 8.95E-13 | 3.05E-12 |
| ATP6V0A4  | 3152  | 16.5   | 42      | 0.151994 | 0.39039  | 1.360906 | Up | 0.000584 | 0.001226 |
| C19orf71  | 671   | 129.5  | 327     | 5.623235 | 14.42896 | 1.359495 | Up | 0        | 0        |
| HOXB9     | 2711  | 115    | 290.5   | 1.239075 | 3.178209 | 1.358951 | Up | 0        | 0        |
| CTHRC1    | 1236  | 115.5  | 289     | 2.710473 | 6.938191 | 1.356015 | Up | 0        | 0        |
| ZNF432    | 2593  | 199    | 500.5   | 2.239399 | 5.721541 | 1.353292 | Up | 3.57E-14 | 1.32E-13 |
| TNFRSF19  | 1625  | 531.5  | 1332    | 9.507116 | 24.28052 | 1.352719 | Up | 4.93E-14 | 1.81E-13 |
| FOXN3     | 7907  | 162.5  | 407     | 0.59765  | 1.524065 | 1.350551 | Up | 0        | 0        |
| C8orf58   | 1955  | 513    | 1283.5  | 7.623431 | 19.40078 | 1.347603 | Up | 0        | 0        |
| FAM70B    | 1047  | 174    | 431     | 4.798264 | 12.20494 | 1.346881 | Up | 1.43E-13 | 5.11E-13 |
| SMAD9     | 5481  | 789    | 1963.5  | 4.175909 | 10.61018 | 1.345288 | Up | 0        | 0        |
| IPMK      | 6133  | 435.5  | 1082    | 2.062474 | 5.234072 | 1.343558 | Up | 1.31E-12 | 4.39E-12 |
| CXCR7     | 2114  | 356    | 890     | 4.905759 | 12.44141 | 1.342601 | Up | 6.28E-13 | 2.16E-12 |
| NRXN2     | 6413  | 25     | 66      | 0.117798 | 0.298556 | 1.341684 | Up | 1.38E-05 | 3.22E-05 |
| HES2      | 4273  | 52     | 131     | 0.359138 | 0.906139 | 1.335194 | Up | 3.28E-09 | 8.98E-09 |
| FZD3      | 13758 | 94.5   | 235     | 0.200801 | 0.50657  | 1.334995 | Up | 0        | 0        |

|          |      |        |         |          |          |          |    |          |          |
|----------|------|--------|---------|----------|----------|----------|----|----------|----------|
| TNIK     | 5816 | 165    | 417     | 0.841096 | 2.119889 | 1.333647 | Up | 4.11E-14 | 1.51E-13 |
| CDC42EP3 | 3981 | 4202.5 | 10343.5 | 30.63297 | 77.04434 | 1.330604 | Up | 1.88E-11 | 5.73E-11 |
| EGFR     | 5616 | 3907.5 | 9624.5  | 20.20344 | 50.77545 | 1.32953  | Up | 8.73E-12 | 2.73E-11 |
| TSC22D3  | 2312 | 1102   | 2710    | 13.82186 | 34.7099  | 1.328396 | Up | 2.55E-12 | 8.39E-12 |
| CHIC2    | 1178 | 379    | 928     | 9.326491 | 23.38146 | 1.325959 | Up | 4.40E-14 | 1.61E-13 |
| TNFSF4   | 3493 | 1645   | 4016    | 13.65816 | 34.09529 | 1.31981  | Up | 5.18E-12 | 1.65E-11 |
| IGF2     | 4856 | 23     | 57      | 0.13887  | 0.346574 | 1.319433 | Up | 0.000127 | 0.000278 |
| GJB2     | 2347 | 16     | 39      | 0.198177 | 0.49403  | 1.317805 | Up | 0.001842 | 0.00371  |
| SPEF1    | 1597 | 22     | 54      | 0.397591 | 0.990532 | 1.316917 | Up | 0.000217 | 0.000469 |
| NOL3     | 1515 | 1038.5 | 2534.5  | 19.90462 | 49.48565 | 1.313907 | Up | 2.62E-14 | 9.68E-14 |
| PDXP     | 2072 | 767    | 1879    | 10.78648 | 26.81231 | 1.313671 | Up | 0        | 0        |
| ERN1     | 4005 | 205.5  | 501.5   | 1.492617 | 3.705147 | 1.311686 | Up | 4.23E-13 | 1.48E-12 |
| NFIL3    | 2104 | 995.5  | 2420    | 13.74926 | 34.11667 | 1.311123 | Up | 0        | 0        |
| KRT81    | 1926 | 26     | 63      | 0.39124  | 0.970605 | 1.310829 | Up | 7.66E-05 | 0.000171 |
| TBC1D3F  | 2122 | 102    | 246     | 1.387066 | 3.439001 | 1.309953 | Up | 0        | 0        |
| MPP4     | 2475 | 287    | 697     | 3.365863 | 8.344422 | 1.309836 | Up | 4.35E-13 | 1.51E-12 |
| EHD2     | 3601 | 9627   | 23440.5 | 77.78025 | 192.7259 | 1.309075 | Up | 5.51E-12 | 1.75E-11 |
| TBC1D3B  | 2114 | 20.5   | 49.5    | 0.279458 | 0.692138 | 1.308426 | Up | 0.00044  | 0.000934 |
| PORCN    | 1849 | 1227   | 2987.5  | 19.2997  | 47.7856  | 1.307998 | Up | 2.32E-12 | 7.67E-12 |
| LYZ      | 1516 | 51     | 122.5   | 0.970385 | 2.401793 | 1.307483 | Up | 4.78E-08 | 1.25E-07 |
| PFKP     | 2781 | 8405.5 | 20384.5 | 87.82189 | 217.099  | 1.305701 | Up | 0        | 0        |
| C18orf19 | 4392 | 913.5  | 2208    | 6.031069 | 14.90799 | 1.3056   | Up | 0        | 0        |
| SLC25A36 | 4677 | 1731   | 4172    | 10.70957 | 26.44687 | 1.304197 | Up | 0        | 0        |
| LMO7     | 7253 | 4324   | 10448   | 17.30551 | 42.70739 | 1.303254 | Up | 5.89E-12 | 1.87E-11 |
| C14orf45 | 3123 | 95     | 233     | 0.895689 | 2.21013  | 1.303062 | Up | 7.55E-15 | 2.83E-14 |

|              |       |          |          |          |          |          |    |          |          |
|--------------|-------|----------|----------|----------|----------|----------|----|----------|----------|
| SLC25A45     | 2231  | 55.5     | 134      | 0.718284 | 1.771198 | 1.302099 | Up | 6.00E-09 | 1.63E-08 |
| S100A10      | 1069  | 10117    | 24376    | 274.3273 | 676.1767 | 1.301502 | Up | 2.20E-12 | 7.26E-12 |
| LAMB3        | 4093  | 10446    | 25258.5  | 74.13231 | 182.7205 | 1.301464 | Up | 0        | 0        |
| CECR6        | 3979  | 17       | 41       | 0.123912 | 0.30522  | 1.300536 | Up | 0.001547 | 0.003139 |
| PMEPA1       | 4590  | 5309.5   | 12770.5  | 33.53989 | 82.37889 | 1.296397 | Up | 0        | 0        |
| LPO          | 2744  | 17       | 43       | 0.187208 | 0.459499 | 1.295417 | Up | 0.00073  | 0.001519 |
| SLC7A5       | 4543  | 10149    | 24415    | 64.87059 | 158.9488 | 1.292925 | Up | 0        | 0        |
| THBS1        | 5820  | 190951.5 | 456767.5 | 951.301  | 2326.339 | 1.290087 | Up | 2.37E-10 | 6.80E-10 |
| SLC8A1       | 6014  | 644.5    | 1545     | 3.118307 | 7.612293 | 1.287568 | Up | 5.13E-13 | 1.78E-12 |
| PAQR7        | 3023  | 571      | 1364.5   | 5.478775 | 13.36022 | 1.286019 | Up | 0        | 0        |
| BAIAP3       | 4583  | 153.5    | 367.5    | 0.973531 | 2.370332 | 1.28379  | Up | 0        | 0        |
| CDK5R2       | 2495  | 37       | 88.5     | 0.427881 | 1.040841 | 1.282468 | Up | 4.10E-06 | 9.82E-06 |
| CPNE5        | 3339  | 37       | 89.5     | 0.325224 | 0.790697 | 1.281692 | Up | 2.87E-06 | 6.93E-06 |
| FAM167A      | 4093  | 1408.5   | 3361.5   | 10.00949 | 24.30906 | 1.280126 | Up | 5.18E-12 | 1.65E-11 |
| LOC100507421 | 10558 | 27       | 68       | 0.077276 | 0.187502 | 1.27882  | Up | 2.15E-05 | 4.95E-05 |
| ADRB2        | 2058  | 55       | 133.5    | 0.788608 | 1.91341  | 1.278766 | Up | 8.56E-09 | 2.31E-08 |
| PAG1         | 10759 | 679      | 1623     | 1.843255 | 4.463759 | 1.276004 | Up | 1.60E-13 | 5.71E-13 |
| B3GALT4      | 1704  | 31       | 74.5     | 0.532225 | 1.288052 | 1.275082 | Up | 2.30E-05 | 5.28E-05 |
| FAM107B      | 3785  | 1902.5   | 4504     | 14.58505 | 35.28722 | 1.274655 | Up | 5.11E-12 | 1.63E-11 |
| ESAM         | 1869  | 30.5     | 71.5     | 0.46856  | 1.133276 | 1.274193 | Up | 3.89E-05 | 8.84E-05 |
| PANX1        | 2782  | 948.5    | 2249     | 9.901536 | 23.93864 | 1.273617 | Up | 0        | 0        |
| TNFRSF9      | 6001  | 72       | 171      | 0.349931 | 0.845158 | 1.272152 | Up | 1.29E-10 | 3.76E-10 |
| DACT1        | 3877  | 187      | 445      | 1.408361 | 3.398775 | 1.270998 | Up | 3.37E-13 | 1.18E-12 |
| VWCE         | 3536  | 45       | 106      | 0.368331 | 0.888085 | 1.269694 | Up | 5.29E-07 | 1.32E-06 |
| HHAT         | 3507  | 177.5    | 419.5    | 1.473129 | 3.549503 | 1.268733 | Up | 0        | 0        |

|                |       |         |          |          |          |          |    |          |          |
|----------------|-------|---------|----------|----------|----------|----------|----|----------|----------|
| ZNF385A        | 2353  | 288     | 682      | 3.568826 | 8.574439 | 1.264593 | Up | 4.49E-14 | 1.64E-13 |
| ZNF664-FAM101A | 2413  | 42.5    | 100      | 0.510822 | 1.227106 | 1.264368 | Up | 8.74E-07 | 2.16E-06 |
| ZNF654         | 4957  | 760     | 1785.5   | 4.446345 | 10.67543 | 1.263602 | Up | 2.39E-12 | 7.86E-12 |
| TUBB6          | 1843  | 3805    | 8952.5   | 60.00487 | 143.8557 | 1.261471 | Up | 2.85E-12 | 9.32E-12 |
| LOC388849      | 627   | 25      | 58.5     | 1.157267 | 2.764762 | 1.256434 | Up | 0.000266 | 0.000573 |
| LOXL2          | 3810  | 43509.5 | 101958.5 | 331.8341 | 792.3523 | 1.25568  | Up | 2.53E-10 | 7.27E-10 |
| EIF4EBP1       | 877   | 2231.5  | 5226     | 73.87326 | 176.356  | 1.255366 | Up | 0        | 0        |
| FEM1C          | 5813  | 1200    | 2800     | 5.98468  | 14.28619 | 1.255275 | Up | 1.80E-12 | 5.99E-12 |
| ASL            | 1937  | 2504    | 5868.5   | 37.56952 | 89.66603 | 1.254999 | Up | 0        | 0        |
| C11orf45       | 3648  | 92      | 217      | 0.736903 | 1.758535 | 1.254826 | Up | 6.09E-13 | 2.10E-12 |
| FBN1           | 11695 | 22087.5 | 51391.5  | 54.57916 | 130.1591 | 1.253854 | Up | 0        | 0        |
| FRMD6          | 4842  | 2698.5  | 6291.5   | 16.17588 | 38.5522  | 1.252969 | Up | 0        | 0        |
| TSGA10         | 3664  | 23      | 56       | 0.188432 | 0.449086 | 1.252948 | Up | 0.000183 | 0.000398 |
| PGAM2          | 888   | 88      | 207.5    | 2.898916 | 6.895482 | 1.250138 | Up | 2.34E-12 | 7.72E-12 |
| TNIP1          | 3268  | 5033    | 11756.5  | 44.76631 | 106.4778 | 1.250068 | Up | 1.54E-11 | 4.74E-11 |
| BHLHE40        | 3061  | 3962.5  | 9223.5   | 37.55799 | 89.30414 | 1.249607 | Up | 9.16E-12 | 2.86E-11 |
| AGPAT5         | 5535  | 2050.5  | 4766     | 10.73877 | 25.52178 | 1.2489   | Up | 0        | 0        |
| LRP1           | 14905 | 11695   | 27144.5  | 22.67731 | 53.86842 | 1.248191 | Up | 4.59E-13 | 1.60E-12 |
| HDAC9          | 4238  | 434.5   | 1009     | 2.978109 | 7.057513 | 1.244763 | Up | 0        | 0        |
| LRRC7          | 6313  | 46      | 109      | 0.215093 | 0.509586 | 1.244367 | Up | 3.15E-07 | 7.96E-07 |
| SLAMF8         | 3316  | 105     | 248      | 0.937452 | 2.214487 | 1.240156 | Up | 0        | 0        |
| PTGS2          | 4507  | 1288    | 2980.5   | 8.299963 | 19.60394 | 1.239967 | Up | 6.74E-12 | 2.13E-11 |
| F11R           | 4830  | 138.5   | 323.5    | 0.837743 | 1.978671 | 1.239953 | Up | 1.83E-13 | 6.53E-13 |
| ALOX5AP        | 921   | 46.5    | 108      | 1.474564 | 3.48021  | 1.238887 | Up | 4.47E-07 | 1.12E-06 |
| KDEL3          | 1705  | 1837.5  | 4235.5   | 31.2374  | 73.59863 | 1.236404 | Up | 3.07E-12 | 1.00E-11 |

|          |       |        |        |          |          |          |    |          |          |
|----------|-------|--------|--------|----------|----------|----------|----|----------|----------|
| ARL6     | 1408  | 162    | 372    | 3.32679  | 7.834237 | 1.235662 | Up | 0        | 0        |
| RHPN1    | 3795  | 35.5   | 82.5   | 0.273597 | 0.643282 | 1.233398 | Up | 1.16E-05 | 2.72E-05 |
| EPS8L2   | 3156  | 555.5  | 1288.5 | 5.146747 | 12.09208 | 1.23233  | Up | 0        | 0        |
| ETS1     | 5143  | 3624   | 8302.5 | 20.43065 | 47.88888 | 1.228955 | Up | 0        | 0        |
| SLC19A2  | 3655  | 389.5  | 895    | 3.09429  | 7.25195  | 1.228761 | Up | 0        | 0        |
| FHL2     | 1727  | 1309.5 | 3005.5 | 22.01956 | 51.5701  | 1.227749 | Up | 5.27E-12 | 1.68E-11 |
| TCP11L2  | 2243  | 137.5  | 313.5  | 1.76952  | 4.143982 | 1.22766  | Up | 2.87E-13 | 1.01E-12 |
| BTG1     | 4704  | 1551   | 3552   | 9.567185 | 22.3877  | 1.22654  | Up | 2.30E-12 | 7.59E-12 |
| DUSP14   | 1508  | 1080   | 2471   | 20.77077 | 48.54586 | 1.224793 | Up | 5.71E-12 | 1.81E-11 |
| NCKIPSD  | 2968  | 906    | 2075   | 8.859149 | 20.68953 | 1.223661 | Up | 0        | 0        |
| ZFP36    | 1745  | 457    | 1047   | 7.613872 | 17.76968 | 1.222716 | Up | 1.73E-12 | 5.76E-12 |
| TLN2     | 11650 | 400    | 920    | 1.002254 | 2.338355 | 1.222246 | Up | 0        | 0        |
| NPR3     | 7447  | 178    | 415    | 0.705936 | 1.644471 | 1.220015 | Up | 1.14E-13 | 4.11E-13 |
| UGCG     | 1637  | 1197   | 2726.5 | 21.23202 | 49.4453  | 1.219592 | Up | 2.02E-12 | 6.69E-12 |
| FSTL3    | 2525  | 6275.5 | 14302  | 72.18555 | 167.8182 | 1.217117 | Up | 1.75E-11 | 5.35E-11 |
| ATP2B3   | 6420  | 16     | 38     | 0.075309 | 0.17454  | 1.212667 | Up | 0.002667 | 0.005299 |
| C7       | 4034  | 124    | 287    | 0.905526 | 2.098539 | 1.212557 | Up | 1.28E-13 | 4.59E-13 |
| OCEL1    | 1124  | 194    | 439    | 4.997029 | 11.57597 | 1.21199  | Up | 5.28E-13 | 1.83E-12 |
| AHNAK    | 1108  | 18638  | 42072  | 485.8184 | 1124.905 | 1.211315 | Up | 0        | 0        |
| NEDD4L   | 8300  | 777    | 1761.5 | 2.719174 | 6.295837 | 1.211229 | Up | 0        | 0        |
| DUSP6    | 2404  | 1238   | 2800   | 14.93985 | 34.50099 | 1.207472 | Up | 2.93E-12 | 9.56E-12 |
| PLCB4    | 5640  | 1046   | 2360   | 5.38141  | 12.42257 | 1.206907 | Up | 1.19E-12 | 4.02E-12 |
| APAF1    | 7204  | 1165.5 | 2628   | 4.708932 | 10.81808 | 1.199973 | Up | 2.00E-12 | 6.62E-12 |
| B4GALNT4 | 3463  | 269.5  | 606.5  | 2.260827 | 5.1866   | 1.197939 | Up | 5.77E-14 | 2.11E-13 |
| C1orf9   | 5480  | 2435.5 | 5461   | 12.90522 | 29.56676 | 1.196021 | Up | 0        | 0        |

|          |       |        |        |          |          |          |    |          |          |
|----------|-------|--------|--------|----------|----------|----------|----|----------|----------|
| TMEM67   | 4744  | 260.5  | 584.5  | 1.591326 | 3.644415 | 1.195457 | Up | 4.56E-13 | 1.59E-12 |
| COL17A1  | 5610  | 81     | 185    | 0.424843 | 0.971138 | 1.192747 | Up | 1.14E-10 | 3.31E-10 |
| FAM63B   | 5013  | 674    | 1514   | 3.919023 | 8.95732  | 1.192573 | Up | 2.58E-14 | 9.52E-14 |
| KDM4C    | 3850  | 1208.5 | 2711.5 | 9.128733 | 20.86268 | 1.192438 | Up | 3.18E-12 | 1.04E-11 |
| BACH1    | 5770  | 1376   | 3071   | 6.915398 | 15.78035 | 1.190245 | Up | 3.69E-12 | 1.19E-11 |
| RELT     | 3520  | 735.5  | 1645.5 | 6.064559 | 13.83522 | 1.189871 | Up | 9.46E-13 | 3.22E-12 |
| EPB41L4B | 3783  | 95     | 217    | 0.743062 | 1.695023 | 1.18975  | Up | 2.82E-12 | 9.23E-12 |
| EBI3     | 1149  | 23.5   | 53     | 0.600052 | 1.367146 | 1.188008 | Up | 0.000539 | 0.001134 |
| MAPK7    | 2972  | 964.5  | 2156   | 9.44202  | 21.48464 | 1.186138 | Up | 0        | 0        |
| EPPK1    | 15534 | 25     | 55.5   | 0.046563 | 0.105824 | 1.184411 | Up | 0.000752 | 0.001564 |
| CEP250   | 8341  | 2283   | 5084.5 | 7.937616 | 18.035   | 1.184021 | Up | 0        | 0        |
| PNPLA7   | 4731  | 96     | 213.5  | 0.589398 | 1.336094 | 1.180709 | Up | 1.72E-11 | 5.27E-11 |
| SNTB1    | 4975  | 501    | 1112   | 2.921931 | 6.623475 | 1.180666 | Up | 7.99E-14 | 2.90E-13 |
| DNAJB4   | 2250  | 2581   | 5702.5 | 33.26969 | 75.23549 | 1.177205 | Up | 0        | 0        |
| CTXN1    | 1290  | 250.5  | 556.5  | 5.640125 | 12.74688 | 1.176345 | Up | 2.66E-13 | 9.36E-13 |
| IBA57    | 7921  | 315    | 700.5  | 1.157212 | 2.615113 | 1.17622  | Up | 4.99E-13 | 1.73E-12 |
| CPEB4    | 7769  | 1449.5 | 3209.5 | 5.422356 | 12.25238 | 1.17607  | Up | 6.65E-12 | 2.10E-11 |
| HS3ST3A1 | 2546  | 19     | 42.5   | 0.219195 | 0.495176 | 1.175727 | Up | 0.003156 | 0.006239 |
| CCR10    | 1244  | 24     | 53.5   | 0.562684 | 1.269188 | 1.17351  | Up | 0.000901 | 0.001864 |
| ATP2B4   | 8733  | 4692   | 10363  | 15.60322 | 35.17145 | 1.172561 | Up | 2.82E-11 | 8.46E-11 |
| GXYLT2   | 1547  | 289.5  | 640    | 5.447871 | 12.2709  | 1.171476 | Up | 0        | 0        |
| ACTA2    | 1415  | 684.5  | 1509   | 14.03539 | 31.5707  | 1.169517 | Up | 0        | 0        |
| SLAMF7   | 2672  | 27     | 62     | 0.304484 | 0.68451  | 1.168706 | Up | 0.000188 | 0.000408 |
| OSR1     | 1911  | 320.5  | 704.5  | 4.857736 | 10.88395 | 1.163846 | Up | 0        | 0        |
| ADAMTS9  | 7335  | 1169   | 2572.5 | 4.636435 | 10.38719 | 1.163718 | Up | 2.25E-12 | 7.42E-12 |

|           |       |         |         |          |          |          |    |          |          |
|-----------|-------|---------|---------|----------|----------|----------|----|----------|----------|
| SCD       | 5473  | 15139   | 33214.5 | 80.29153 | 179.7796 | 1.16291  | Up | 0        | 0        |
| METRNL    | 1348  | 3450.5  | 7584.5  | 74.41522 | 166.5745 | 1.162498 | Up | 0        | 0        |
| TSPAN5    | 3406  | 1280    | 2799.5  | 10.89041 | 24.37433 | 1.162304 | Up | 3.82E-12 | 1.23E-11 |
| RYR1      | 15376 | 123     | 282     | 0.241725 | 0.540696 | 1.161449 | Up | 0        | 0        |
| CHST3     | 6978  | 285.5   | 626     | 1.188809 | 2.655928 | 1.159699 | Up | 6.22E-13 | 2.14E-12 |
| KDM4B     | 5675  | 1924    | 4218.5  | 9.847388 | 21.97378 | 1.15797  | Up | 5.28E-12 | 1.68E-11 |
| SEC61G    | 480   | 6985.5  | 15190.5 | 421.5591 | 940.2842 | 1.157362 | Up | 2.60E-11 | 7.82E-11 |
| CECR5     | 1734  | 599     | 1309.5  | 10.03086 | 22.34509 | 1.155512 | Up | 7.53E-13 | 2.58E-12 |
| PCDH1     | 3851  | 104.5   | 236     | 0.808359 | 1.7998   | 1.154769 | Up | 3.44E-13 | 1.21E-12 |
| C1orf96   | 5121  | 880     | 1914    | 4.98627  | 11.07887 | 1.151778 | Up | 1.52E-12 | 5.08E-12 |
| MAFK      | 3350  | 3932.5  | 8562    | 34.05724 | 75.62193 | 1.150843 | Up | 8.08E-12 | 2.53E-11 |
| GPM6B     | 1799  | 19      | 43      | 0.317865 | 0.704848 | 1.148897 | Up | 0.002228 | 0.004459 |
| HIST1H2BD | 829   | 314     | 681     | 10.99982 | 24.33785 | 1.145722 | Up | 1.32E-13 | 4.73E-13 |
| TMEM184A  | 6293  | 628.5   | 1363    | 2.895388 | 6.405565 | 1.145569 | Up | 5.00E-13 | 1.74E-12 |
| JUN       | 3338  | 2624    | 5676    | 22.81869 | 50.37334 | 1.142445 | Up | 0        | 0        |
| COL5A1    | 8439  | 89888   | 194707  | 309.4913 | 682.6218 | 1.141188 | Up | 0        | 0        |
| SLC2A13   | 7018  | 926.5   | 2000    | 3.835239 | 8.450763 | 1.139765 | Up | 0        | 0        |
| ZFPM1     | 3241  | 325     | 702.5   | 2.913317 | 6.413377 | 1.138421 | Up | 9.53E-14 | 3.45E-13 |
| IER3      | 1254  | 4974.5  | 10744   | 115.2751 | 253.6074 | 1.137516 | Up | 2.92E-11 | 8.74E-11 |
| GPX3      | 1779  | 23      | 51      | 0.386802 | 0.850078 | 1.136002 | Up | 0.00108  | 0.002218 |
| BMPER     | 3399  | 392     | 850.5   | 3.372183 | 7.400315 | 1.133904 | Up | 0        | 0        |
| MT2A      | 466   | 35276.5 | 75871   | 2200.167 | 4820.74  | 1.131641 | Up | 1.56E-10 | 4.51E-10 |
| ADCY5     | 6098  | 28      | 63      | 0.137244 | 0.300688 | 1.131526 | Up | 0.000223 | 0.000481 |
| RLTPR     | 4512  | 55      | 118     | 0.354103 | 0.775443 | 1.130853 | Up | 1.38E-06 | 3.37E-06 |
| CGB8      | 904   | 28      | 61      | 0.910557 | 1.99283  | 1.129997 | Up | 0.000438 | 0.000929 |

|          |       |         |         |          |          |          |    |          |          |
|----------|-------|---------|---------|----------|----------|----------|----|----------|----------|
| NAT8L    | 2327  | 19      | 41      | 0.237851 | 0.520059 | 1.128613 | Up | 0.004444 | 0.00865  |
| UBR5     | 10900 | 5430    | 11578.5 | 14.42457 | 31.47599 | 1.125723 | Up | 1.05E-11 | 3.26E-11 |
| MLXIP    | 5400  | 1139    | 2441.5  | 6.133136 | 13.37621 | 1.124973 | Up | 3.20E-12 | 1.04E-11 |
| GCHFR    | 713   | 38.5    | 83.5    | 1.588214 | 3.463482 | 1.124818 | Up | 3.79E-05 | 8.63E-05 |
| EFTUD1   | 3685  | 527.5   | 1129.5  | 4.168026 | 9.085516 | 1.124204 | Up | 6.15E-13 | 2.12E-12 |
| TANC2    | 11747 | 1466    | 3148.5  | 3.642544 | 7.935986 | 1.123463 | Up | 1.14E-12 | 3.86E-12 |
| PARM1    | 5069  | 238     | 511.5   | 1.370789 | 2.98533  | 1.122884 | Up | 6.71E-13 | 2.31E-12 |
| AGAP1    | 4371  | 750.5   | 1605.5  | 4.992784 | 10.87267 | 1.12279  | Up | 0        | 0        |
| BDKRB1   | 1307  | 43      | 93.5    | 0.973082 | 2.11673  | 1.121204 | Up | 1.57E-05 | 3.64E-05 |
| PHLDA3   | 1516  | 3162.5  | 6755    | 60.54242 | 131.6879 | 1.121105 | Up | 0        | 0        |
| CHAC1    | 1443  | 302.5   | 648     | 6.109561 | 13.28042 | 1.12016  | Up | 5.71E-13 | 1.97E-12 |
| SAMD4A   | 6268  | 488.5   | 1041.5  | 2.264957 | 4.920869 | 1.119429 | Up | 1.35E-12 | 4.55E-12 |
| TUBGCP2  | 3198  | 3039.5  | 6475.5  | 27.61914 | 59.94469 | 1.117963 | Up | 0        | 0        |
| BHLHE41  | 3796  | 1570.5  | 3330    | 11.98518 | 25.98552 | 1.116456 | Up | 6.35E-12 | 2.01E-11 |
| KLF7     | 1639  | 211.5   | 448     | 3.736921 | 8.093503 | 1.114914 | Up | 2.52E-13 | 8.92E-13 |
| MKKN2    | 3805  | 3744    | 7957.5  | 28.61467 | 61.90567 | 1.113317 | Up | 6.16E-12 | 1.95E-11 |
| AEN      | 3134  | 2203    | 4679    | 20.45971 | 44.24884 | 1.112854 | Up | 0        | 0        |
| ADRA1D   | 2666  | 125.5   | 266     | 1.363076 | 2.940285 | 1.10909  | Up | 6.02E-13 | 2.08E-12 |
| HIVEP2   | 9732  | 1442.5  | 3067    | 4.328831 | 9.323598 | 1.106909 | Up | 4.51E-12 | 1.45E-11 |
| IL32     | 892   | 1139.5  | 2404    | 37.08919 | 79.84137 | 1.106138 | Up | 3.20E-12 | 1.04E-11 |
| TMEM191B | 1334  | 41.5    | 88      | 0.907367 | 1.951957 | 1.105163 | Up | 3.09E-05 | 7.07E-05 |
| COL4A1   | 6549  | 19700.5 | 41523   | 87.32642 | 187.7001 | 1.103939 | Up | 0        | 0        |
| TBC1D3   | 2079  | 166     | 347.5   | 2.299061 | 4.93803  | 1.102891 | Up | 2.17E-13 | 7.69E-13 |
| NR4A3    | 5707  | 43      | 93      | 0.223657 | 0.480352 | 1.102806 | Up | 1.57E-05 | 3.64E-05 |
| IMMP2L   | 1539  | 143     | 299.5   | 2.689941 | 5.776033 | 1.102504 | Up | 0        | 0        |



|           |      |        |         |          |          |          |    |          |          |
|-----------|------|--------|---------|----------|----------|----------|----|----------|----------|
| GAL3ST4   | 2561 | 30.5   | 65      | 0.349569 | 0.750295 | 1.101881 | Up | 0.000306 | 0.000654 |
| LOC643699 | 1788 | 27.5   | 56.5    | 0.437803 | 0.93757  | 1.098646 | Up | 0.001404 | 0.002861 |
| RNF207    | 3987 | 21     | 44.5    | 0.154267 | 0.330177 | 1.09781  | Up | 0.004272 | 0.00833  |
| PFKL      | 2924 | 6945   | 14604   | 69.10858 | 147.7596 | 1.096315 | Up | 4.10E-11 | 1.22E-10 |
| PITPNC1   | 2005 | 141.5  | 301     | 2.075335 | 4.432007 | 1.094616 | Up | 1.44E-14 | 5.37E-14 |
| NEDD9     | 4745 | 531    | 1124    | 3.286775 | 7.016769 | 1.094134 | Up | 4.93E-14 | 1.80E-13 |
| DPCD      | 858  | 563.5  | 1176.5  | 19.04196 | 40.62968 | 1.093352 | Up | 1.35E-13 | 4.85E-13 |
| RNF182    | 3284 | 21     | 46      | 0.192532 | 0.409927 | 1.090271 | Up | 0.002186 | 0.00438  |
| ADRA1B    | 2272 | 103    | 215.5   | 1.321416 | 2.812658 | 1.089849 | Up | 2.35E-10 | 6.76E-10 |
| FOSL2     | 4015 | 3015   | 6294.5  | 21.82805 | 46.44767 | 1.089423 | Up | 0        | 0        |
| PYGL      | 2757 | 1481.5 | 3088.5  | 15.60843 | 33.18517 | 1.088214 | Up | 5.28E-12 | 1.68E-11 |
| RALGAPA2  | 9453 | 456.5  | 957.5   | 1.408516 | 2.993603 | 1.087707 | Up | 1.95E-12 | 6.46E-12 |
| ARHGAP22  | 2775 | 720    | 1504.5  | 7.549969 | 16.0397  | 1.087105 | Up | 0        | 0        |
| CCRN4L    | 1971 | 427    | 890.5   | 6.305363 | 13.39025 | 1.086532 | Up | 1.02E-12 | 3.46E-12 |
| PLAUR     | 1455 | 2955   | 6161    | 59.01099 | 125.259  | 1.085859 | Up | 0        | 0        |
| DUSP8     | 4491 | 211    | 437     | 1.362222 | 2.882262 | 1.08124  | Up | 2.52E-13 | 8.92E-13 |
| CRIM1     | 5628 | 12224  | 25326.5 | 63.07851 | 133.3712 | 1.080227 | Up | 3.57E-11 | 1.06E-10 |
| PIP5KL1   | 1131 | 29     | 60      | 0.745388 | 1.574876 | 1.079174 | Up | 0.000973 | 0.002006 |
| KIAA1984  | 1727 | 42     | 86.5    | 0.700331 | 1.479328 | 1.078833 | Up | 9.21E-05 | 0.000204 |
| HECW2     | 6926 | 812    | 1680.5  | 3.412143 | 7.190963 | 1.075507 | Up | 1.63E-12 | 5.45E-12 |
| ADAM12    | 6093 | 4790.5 | 9898    | 22.83426 | 48.12031 | 1.075446 | Up | 2.40E-11 | 7.24E-11 |
| PTPRH     | 3935 | 62     | 132     | 0.469111 | 0.987685 | 1.074121 | Up | 4.04E-07 | 1.02E-06 |
| SLC35A3   | 2149 | 607.5  | 1246    | 8.196205 | 17.2123  | 1.070412 | Up | 0        | 0        |
| PARP8     | 7051 | 1161   | 2384    | 4.773111 | 10.01753 | 1.069525 | Up | 3.11E-12 | 1.01E-11 |
| FAM117B   | 5795 | 340.5  | 701     | 1.712942 | 3.583062 | 1.064717 | Up | 1.85E-13 | 6.59E-13 |

|           |       |        |         |          |          |          |    |          |          |
|-----------|-------|--------|---------|----------|----------|----------|----|----------|----------|
| PLOD1     | 3047  | 2694   | 5524.5  | 25.6786  | 53.69443 | 1.064206 | Up | 0        | 0        |
| TBC1D3H   | 2305  | 25     | 52      | 0.317784 | 0.664291 | 1.063772 | Up | 0.002031 | 0.004083 |
| HDAC11    | 2918  | 179    | 366.5   | 1.782868 | 3.716602 | 1.059784 | Up | 0        | 0        |
| NRG4      | 2195  | 41     | 84.5    | 0.544564 | 1.134956 | 1.059462 | Up | 0.00011  | 0.000243 |
| F2RL1     | 2883  | 6439.5 | 13132   | 64.7919  | 134.9745 | 1.058802 | Up | 3.22E-11 | 9.62E-11 |
| C9orf25   | 3692  | 1709.5 | 3485.5  | 13.43963 | 27.95759 | 1.056746 | Up | 5.11E-15 | 1.93E-14 |
| RAB11FIP5 | 4362  | 2099.5 | 4288    | 13.98916 | 29.07927 | 1.055681 | Up | 0        | 0        |
| TPI1      | 1366  | 24731  | 50408.5 | 525.5079 | 1092.25  | 1.055519 | Up | 3.18E-11 | 9.49E-11 |
| EDEM1     | 6162  | 5514.5 | 11213   | 25.96007 | 53.94891 | 1.055299 | Up | 2.22E-11 | 6.71E-11 |
| LRRC17    | 2303  | 5634.5 | 11428   | 70.94167 | 147.0166 | 1.051274 | Up | 2.50E-11 | 7.54E-11 |
| FAM101A   | 2160  | 37     | 75.5    | 0.499555 | 1.032171 | 1.046968 | Up | 0.00031  | 0.000662 |
| PAPPA     | 11025 | 5490.5 | 11102   | 14.44059 | 29.82395 | 1.046342 | Up | 1.66E-11 | 5.09E-11 |
| IRF7      | 2051  | 170.5  | 346     | 2.414089 | 4.983243 | 1.045606 | Up | 3.83E-13 | 1.34E-12 |
| FOXD1     | 2272  | 937    | 1897    | 11.9914  | 24.7206  | 1.043713 | Up | 0        | 0        |
| RRAGD     | 4926  | 43     | 90      | 0.262378 | 0.539477 | 1.039916 | Up | 4.11E-05 | 9.34E-05 |
| NKX3-1    | 3281  | 694    | 1396.5  | 6.144397 | 12.61901 | 1.038255 | Up | 7.61E-13 | 2.60E-12 |
| TUFT1     | 3083  | 145    | 291     | 1.369092 | 2.807538 | 1.036086 | Up | 1.79E-12 | 5.94E-12 |
| ANKRD36B  | 5986  | 120    | 240.5   | 0.580654 | 1.190497 | 1.035813 | Up | 1.83E-10 | 5.28E-10 |
| TRIO      | 10244 | 6889.5 | 13823   | 19.51382 | 39.98625 | 1.035008 | Up | 3.41E-11 | 1.02E-10 |
| FNIP2     | 5801  | 600    | 1204    | 3.001002 | 6.146712 | 1.03437  | Up | 0        | 0        |
| ZXDA      | 5204  | 81     | 162     | 0.45005  | 0.921274 | 1.033545 | Up | 1.67E-07 | 4.26E-07 |
| CTH       | 2008  | 150.5  | 301     | 2.169956 | 4.440357 | 1.03301  | Up | 7.57E-13 | 2.59E-12 |
| GRIK2     | 4724  | 195    | 389     | 1.195359 | 2.441976 | 1.030605 | Up | 1.93E-13 | 6.84E-13 |
| SLC15A4   | 2789  | 677.5  | 1356.5  | 7.067235 | 14.43156 | 1.03001  | Up | 5.28E-13 | 1.83E-12 |
| GGT1      | 2393  | 260    | 519.5   | 3.151286 | 6.43087  | 1.029073 | Up | 4.56E-13 | 1.59E-12 |

|                |      |        |        |          |          |          |      |          |          |
|----------------|------|--------|--------|----------|----------|----------|------|----------|----------|
| KIF17          | 3810 | 53     | 109.5  | 0.414326 | 0.8444   | 1.027159 | Up   | 9.47E-06 | 2.22E-05 |
| PGAM1          | 1762 | 19683  | 39305  | 324.388  | 660.5438 | 1.025934 | Up   | 0        | 0        |
| CSPG4          | 8305 | 137    | 273.5  | 0.477748 | 0.972656 | 1.025681 | Up   | 1.31E-11 | 4.04E-11 |
| HRH1           | 4427 | 651    | 1294   | 4.258759 | 8.664603 | 1.024701 | Up   | 2.50E-13 | 8.82E-13 |
| LOC100287177   | 960  | 29     | 58.5   | 0.886528 | 1.803498 | 1.024561 | Up   | 0.001824 | 0.003677 |
| FLVCR2         | 2787 | 37     | 76     | 0.392932 | 0.798986 | 1.023889 | Up   | 0.000227 | 0.00049  |
| BCKDK          | 2097 | 2745   | 5474   | 38.05758 | 77.16871 | 1.019832 | Up   | 0        | 0        |
| C5orf13        | 2099 | 1131.5 | 2228   | 15.61088 | 31.46705 | 1.01129  | Up   | 5.50E-12 | 1.75E-11 |
| FAM120AOS      | 2779 | 659    | 1301   | 6.882008 | 13.87007 | 1.011073 | Up   | 0        | 0        |
| IMPAD1         | 7239 | 9755   | 19230  | 39.07634 | 78.74768 | 1.010942 | Up   | 0        | 0        |
| PGAM4          | 1678 | 547.5  | 1080.5 | 9.459403 | 19.05748 | 1.010536 | Up   | 0        | 0        |
| LOC390940      | 938  | 58     | 116.5  | 1.817087 | 3.657102 | 1.009073 | Up   | 9.69E-06 | 2.27E-05 |
| LOC100652762   | 1905 | 106    | 208.5  | 1.610324 | 3.239599 | 1.008465 | Up   | 6.72E-09 | 1.82E-08 |
| FLRT1          | 3252 | 26.5   | 53     | 0.239887 | 0.482161 | 1.007161 | Up   | 0.002325 | 0.004644 |
| ACTBL2         | 2814 | 94     | 191.5  | 0.995537 | 2.00033  | 1.006691 | Up   | 6.98E-09 | 1.89E-08 |
| RELB           | 2297 | 741.5  | 1464.5 | 9.393446 | 18.86981 | 1.006354 | Up   | 0        | 0        |
| VEGFC          | 2076 | 2534.5 | 4980   | 35.38743 | 71.08654 | 1.00634  | Up   | 0        | 0        |
| SLC38A4        | 3807 | 436.5  | 858.5  | 3.332349 | 6.6883   | 1.0051   | Up   | 4.26E-13 | 1.49E-12 |
| SLC45A1        | 2401 | 177    | 351.5  | 2.160713 | 4.326953 | 1.001844 | Up   | 0        | 0        |
| HERPUD1        | 2198 | 2394   | 4701.5 | 31.60393 | 63.27753 | 1.001589 | Up   | 0        | 0        |
| LOC100653202   | 1435 | 11.5   | 0      | 0.231767 | 0.001    | -7.85653 | Down | 0.000488 | 0.001031 |
| LOC100130589   | 1356 | 8      | 0      | 0.171505 | 0.001    | -7.42211 | Down | 0.003906 | 0.007651 |
| CCDC169-SOHLH2 | 2650 | 11.5   | 0      | 0.125504 | 0.001    | -6.97159 | Down | 0.000488 | 0.001031 |
| FOXD4L5        | 3109 | 8      | 0      | 0.077017 | 0.001    | -6.26711 | Down | 0.003906 | 0.007648 |
| GRASP          | 1950 | 24     | 1      | 0.362494 | 0.014832 | -4.61115 | Down | 8.04E-07 | 2.00E-06 |

|              |      |        |       |          |          |          |      |          |          |
|--------------|------|--------|-------|----------|----------|----------|------|----------|----------|
| HIST1H2BF    | 430  | 12     | 0.5   | 0.808592 | 0.033631 | -4.58753 | Down | 0.000244 | 0.000526 |
| HIST1H3I     | 477  | 10     | 0.5   | 0.628682 | 0.030318 | -4.37411 | Down | 0.000977 | 0.002013 |
| LOC100653286 | 694  | 10     | 0.5   | 0.412265 | 0.021869 | -4.2366  | Down | 0.000977 | 0.002013 |
| CCDC48       | 2691 | 318.5  | 20    | 3.440457 | 0.219748 | -3.96868 | Down | 1.78E-70 | 1.69E-69 |
| RAB7B        | 3032 | 390.5  | 27.5  | 3.757842 | 0.267994 | -3.80963 | Down | 7.30E-84 | 7.86E-83 |
| PRB3         | 1091 | 13     | 1     | 0.360063 | 0.02651  | -3.76362 | Down | 0.000976 | 0.002013 |
| NKX6-1       | 1116 | 14     | 1     | 0.368792 | 0.027199 | -3.76116 | Down | 0.000519 | 0.001093 |
| AKR1C1       | 1384 | 3599   | 272.5 | 75.35871 | 5.828155 | -3.69266 | Down | 0        | 0        |
| HSPA12B      | 3175 | 12     | 1     | 0.111317 | 0.00911  | -3.61115 | Down | 0.001831 | 0.003689 |
| ITGB1BP2     | 1235 | 12     | 1     | 0.286179 | 0.023419 | -3.61115 | Down | 0.001831 | 0.003689 |
| VN1R4        | 906  | 23     | 2     | 0.767114 | 0.063848 | -3.58674 | Down | 1.05E-05 | 2.46E-05 |
| PRRX2        | 1327 | 12     | 1     | 0.261151 | 0.021796 | -3.58276 | Down | 0.001831 | 0.003688 |
| CDC20        | 1697 | 6132.5 | 551.5 | 105.0662 | 9.618432 | -3.44935 | Down | 0        | 0        |
| AKR1C2       | 1663 | 480    | 43    | 8.378933 | 0.768516 | -3.44662 | Down | 9.60E-95 | 1.13E-93 |
| KLHL14       | 4261 | 155    | 14    | 1.053429 | 0.097381 | -3.4353  | Down | 1.63E-31 | 8.94E-31 |
| S1PR5        | 2467 | 33     | 3     | 0.388394 | 0.036332 | -3.41819 | Down | 1.23E-07 | 3.17E-07 |
| IMPA2        | 1537 | 93     | 9     | 1.759708 | 0.173086 | -3.34578 | Down | 5.46E-19 | 2.28E-18 |
| ZNF323       | 3039 | 582.5  | 60    | 5.558614 | 0.580927 | -3.2583  | Down | #####    | #####    |
| GUCY1B3      | 3266 | 1898.5 | 199   | 16.89105 | 1.802184 | -3.22844 | Down | 0        | 0        |
| SUCNR1       | 1650 | 268.5  | 29    | 4.719032 | 0.514416 | -3.19748 | Down | 6.88E-50 | 5.08E-49 |
| HIST1H2BL    | 453  | 13     | 1.5   | 0.844375 | 0.097351 | -3.11661 | Down | 0.000976 | 0.002013 |
| MEX3A        | 6124 | 319    | 37    | 1.512769 | 0.179539 | -3.07483 | Down | 2.27E-57 | 1.85E-56 |
| HIST1H2AJ    | 439  | 16.5   | 2     | 1.104376 | 0.131767 | -3.06717 | Down | 0.000729 | 0.001517 |
| IFI44L       | 5889 | 1698   | 199   | 8.355224 | 1.000451 | -3.06203 | Down | #####    | #####    |
| GBP4         | 6160 | 1314.5 | 155   | 6.184642 | 0.745314 | -3.05277 | Down | #####    | #####    |

|           |       |        |       |          |          |          |      |          |          |
|-----------|-------|--------|-------|----------|----------|----------|------|----------|----------|
| HIST1H2BM | 446   | 16     | 2     | 1.073749 | 0.129699 | -3.04941 | Down | 0.000729 | 0.001516 |
| CCNB1     | 2101  | 7233   | 856.5 | 99.81883 | 12.06846 | -3.04807 | Down | 0        | 0        |
| CORT      | 1238  | 12     | 1.5   | 0.285486 | 0.035044 | -3.02618 | Down | 0.001831 | 0.003688 |
| GUCY1A3   | 1658  | 1600   | 203   | 28.00962 | 3.617207 | -2.95297 | Down | #####    | #####    |
| LOC727983 | 2051  | 26     | 3.5   | 0.371872 | 0.049357 | -2.91349 | Down | 8.43E-06 | 1.99E-05 |
| CYS1      | 2719  | 15     | 2     | 0.158262 | 0.021801 | -2.85984 | Down | 0.001312 | 0.00268  |
| MFI2      | 1696  | 22     | 3     | 0.378442 | 0.053693 | -2.81727 | Down | 8.80E-05 | 0.000196 |
| PLK1      | 2204  | 5605.5 | 785   | 73.8707  | 10.52298 | -2.81146 | Down | 0        | 0        |
| SLC14A1   | 4226  | 494.5  | 70    | 3.401199 | 0.486197 | -2.80643 | Down | 8.17E-80 | 8.50E-79 |
| ASPM      | 10906 | 5354   | 754.5 | 14.22774 | 2.04013  | -2.80197 | Down | 0        | 0        |
| SLC43A2   | 3024  | 1045   | 148   | 10.06243 | 1.447257 | -2.79759 | Down | #####    | #####    |
| SOX18     | 1718  | 49     | 7     | 0.829793 | 0.120346 | -2.78556 | Down | 4.24E-09 | 1.16E-08 |
| ARL9      | 836   | 34.5   | 5     | 1.196234 | 0.174696 | -2.77558 | Down | 1.38E-06 | 3.39E-06 |
| NR0B1     | 1591  | 13     | 2     | 0.246907 | 0.036358 | -2.76362 | Down | 0.004181 | 0.008156 |
| FOXD3     | 2078  | 14     | 2     | 0.193644 | 0.028526 | -2.76305 | Down | 0.00235  | 0.004692 |
| CDK15     | 1534  | 492.5  | 71.5  | 9.322302 | 1.377032 | -2.75912 | Down | 1.00E-78 | 1.03E-77 |
| C10orf55  | 2516  | 70     | 10    | 0.804227 | 0.118939 | -2.75738 | Down | 1.80E-12 | 5.98E-12 |
| HIST1H4D  | 367   | 20     | 3     | 1.602964 | 0.240328 | -2.73767 | Down | 0.000277 | 0.000595 |
| FAM64A    | 1517  | 651    | 96    | 12.49851 | 1.87562  | -2.73632 | Down | #####    | #####    |
| KIF20A    | 3471  | 3413.5 | 510   | 28.53585 | 4.343729 | -2.71577 | Down | 0        | 0        |
| NRG2      | 3945  | 159    | 24    | 1.166704 | 0.178497 | -2.70847 | Down | 7.29E-26 | 3.56E-25 |
| HIST1H2BE | 435   | 32     | 5     | 2.170148 | 0.332447 | -2.70659 | Down | 4.26E-06 | 1.02E-05 |
| KIAA1257  | 1730  | 29.5   | 4.5   | 0.495373 | 0.076061 | -2.7033  | Down | 6.16E-06 | 1.46E-05 |
| MCOLN2    | 3060  | 849.5  | 129   | 8.055855 | 1.246434 | -2.69223 | Down | #####    | #####    |
| LMNB1     | 2267  | 4254.5 | 649   | 54.4436  | 8.49006  | -2.68092 | Down | 0        | 0        |

|           |      |        |       |          |          |          |      |          |          |
|-----------|------|--------|-------|----------|----------|----------|------|----------|----------|
| HIST2H3C  | 507  | 39     | 6     | 2.220323 | 0.34793  | -2.6739  | Down | 3.10E-07 | 7.84E-07 |
| EXOC3L2   | 1719 | 19.5   | 3     | 0.331435 | 0.052142 | -2.66821 | Down | 0.000488 | 0.001032 |
| LOC440243 | 2400 | 18     | 3     | 0.226632 | 0.036154 | -2.64814 | Down | 0.000855 | 0.001773 |
| RSPO3     | 2165 | 51.5   | 8     | 0.688062 | 0.110181 | -2.64267 | Down | 5.21E-09 | 1.42E-08 |
| DDO       | 1556 | 70.5   | 11    | 1.316018 | 0.210908 | -2.64149 | Down | 6.81E-12 | 2.15E-11 |
| HIST2H3D  | 457  | 167.5  | 27    | 10.68118 | 1.74795  | -2.61133 | Down | 4.46E-26 | 2.18E-25 |
| BATF2     | 2142 | 107    | 17.5  | 1.454829 | 0.238972 | -2.60594 | Down | 2.22E-17 | 8.95E-17 |
| C19orf76  | 2112 | 49     | 8     | 0.674993 | 0.110912 | -2.60545 | Down | 1.57E-08 | 4.20E-08 |
| DEPDC1    | 4504 | 4154   | 670   | 26.72453 | 4.409748 | -2.5994  | Down | 0        | 0        |
| E2F2      | 5201 | 424.5  | 69    | 2.370578 | 0.393482 | -2.59087 | Down | 1.37E-63 | 1.20E-62 |
| C14orf176 | 1526 | 15.5   | 2.5   | 0.296401 | 0.04926  | -2.58907 | Down | 0.001312 | 0.00268  |
| METTL7A   | 3390 | 991.5  | 163   | 8.478175 | 1.418982 | -2.5789  | Down | #####    | #####    |
| MAP2K6    | 1879 | 160.5  | 26.5  | 2.466925 | 0.416669 | -2.56574 | Down | 5.68E-25 | 2.72E-24 |
| IDO1      | 1944 | 558.5  | 93    | 8.341358 | 1.412378 | -2.56216 | Down | 5.96E-82 | 6.32E-81 |
| POLE2     | 1783 | 217    | 36    | 3.537339 | 0.600031 | -2.55955 | Down | 6.15E-33 | 3.47E-32 |
| ALDH1A3   | 3510 | 1962   | 326.5 | 16.21449 | 2.763209 | -2.55287 | Down | #####    | #####    |
| ACY3      | 1317 | 111    | 19    | 2.448361 | 0.420524 | -2.54156 | Down | 3.11E-17 | 1.25E-16 |
| FAM72A    | 1881 | 443.5  | 74.5  | 6.81112  | 1.172936 | -2.53777 | Down | 2.55E-65 | 2.29E-64 |
| PLA2G4A   | 2940 | 1771.5 | 299.5 | 17.48132 | 3.01676  | -2.53474 | Down | #####    | #####    |
| IL7       | 1957 | 217.5  | 37    | 3.214132 | 0.55634  | -2.53039 | Down | 2.13E-32 | 1.19E-31 |
| AURKA     | 2554 | 3357.5 | 582   | 38.14589 | 6.745594 | -2.49951 | Down | 0        | 0        |
| ZNF843    | 2013 | 17     | 3     | 0.246071 | 0.043815 | -2.48956 | Down | 0.00149  | 0.003027 |
| PLEKHG4   | 4493 | 2599   | 459.5 | 16.80659 | 3.02327  | -2.47485 | Down | 0        | 0        |
| HOXA7     | 2018 | 164    | 29    | 2.367607 | 0.426992 | -2.47115 | Down | 2.67E-24 | 1.26E-23 |
| HIST1H2AB | 477  | 16.5   | 3     | 1.016396 | 0.183406 | -2.47035 | Down | 0.002577 | 0.005124 |

|           |      |        |        |          |          |          |      |          |          |
|-----------|------|--------|--------|----------|----------|----------|------|----------|----------|
| LYPD6B    | 1600 | 56     | 10     | 1.020324 | 0.184347 | -2.46853 | Down | 4.04E-09 | 1.10E-08 |
| TDO2      | 1713 | 220    | 39     | 3.722752 | 0.676876 | -2.45941 | Down | 4.87E-32 | 2.69E-31 |
| PDK4      | 3710 | 1228.5 | 220.5  | 9.618482 | 1.76222  | -2.44841 | Down | #####    | #####    |
| ALDH3A2   | 3823 | 5085.5 | 914    | 38.55241 | 7.076074 | -2.4458  | Down | 0        | 0        |
| PCDH18    | 5906 | 8248.5 | 1492   | 40.50943 | 7.464675 | -2.44011 | Down | 0        | 0        |
| PTPRC     | 4847 | 142.5  | 26     | 0.850982 | 0.157509 | -2.43369 | Down | 8.94E-21 | 3.89E-20 |
| TNFRSF11B | 2354 | 5440.5 | 997    | 67.02747 | 12.54571 | -2.41756 | Down | 0        | 0        |
| C10orf91  | 738  | 21     | 4      | 0.834973 | 0.156764 | -2.41314 | Down | 0.000534 | 0.001123 |
| KRT12     | 1992 | 18     | 3.5    | 0.271899 | 0.051537 | -2.39939 | Down | 0.000855 | 0.001773 |
| C8orf80   | 3912 | 347.5  | 65.5   | 2.577733 | 0.489756 | -2.39597 | Down | 7.49E-48 | 5.37E-47 |
| PTPRCAP   | 917  | 35     | 6.5    | 1.108296 | 0.21126  | -2.39125 | Down | 2.83E-06 | 6.83E-06 |
| ASF1A     | 2525 | 1277   | 239    | 14.64021 | 2.799452 | -2.38672 | Down | #####    | #####    |
| CROT      | 3342 | 3213.5 | 602.5  | 27.81421 | 5.343837 | -2.37987 | Down | 0        | 0        |
| VMO1      | 765  | 15.5   | 3      | 0.588253 | 0.113423 | -2.37472 | Down | 0.004425 | 0.008617 |
| KRT39     | 1696 | 20     | 4      | 0.353633 | 0.068214 | -2.37411 | Down | 0.000911 | 0.001882 |
| LCP2      | 2472 | 36     | 7      | 0.428922 | 0.083349 | -2.36347 | Down | 5.30E-06 | 1.26E-05 |
| LHX8      | 2393 | 151    | 29.5   | 1.844417 | 0.359542 | -2.35893 | Down | 2.52E-21 | 1.11E-20 |
| PIK3R3    | 5194 | 2561   | 489    | 14.28985 | 2.790948 | -2.35616 | Down | 0        | 0        |
| C9orf140  | 3865 | 1520.5 | 292    | 11.44057 | 2.235309 | -2.35561 | Down | #####    | #####    |
| RHBG      | 1805 | 15     | 3      | 0.24603  | 0.048071 | -2.35559 | Down | 0.004425 | 0.008616 |
| MCM10     | 4562 | 929.5  | 177.5  | 5.893693 | 1.153743 | -2.35285 | Down | #####    | #####    |
| GBP2      | 2595 | 1160   | 223    | 12.97485 | 2.542849 | -2.3512  | Down | #####    | #####    |
| SLC7A11   | 9648 | 22635  | 4386.5 | 67.93289 | 13.48777 | -2.33246 | Down | 0        | 0        |
| SOCS1     | 1216 | 153    | 30     | 3.65107  | 0.727686 | -2.32693 | Down | 2.74E-21 | 1.20E-20 |
| CDCA7     | 2602 | 776.5  | 152.5  | 8.650323 | 1.727047 | -2.32445 | Down | #####    | #####    |

|              |      |         |        |          |          |          |      |          |          |
|--------------|------|---------|--------|----------|----------|----------|------|----------|----------|
| MCM3         | 3143 | 3474.5  | 677.5  | 32.00829 | 6.392399 | -2.32402 | Down | 0        | 0        |
| SP110        | 2519 | 1283    | 252.5  | 14.763   | 2.95999  | -2.31832 | Down | #####    | #####    |
| VIPR1        | 2808 | 10842.5 | 2135   | 112.103  | 22.4793  | -2.31816 | Down | 0        | 0        |
| COX7B2       | 566  | 61      | 12     | 3.12692  | 0.628382 | -2.31503 | Down | 2.86E-09 | 7.86E-09 |
| CYP1B1       | 5160 | 22052.5 | 4343   | 123.9291 | 24.95672 | -2.31201 | Down | 0        | 0        |
| SLC22A11     | 2545 | 19      | 4      | 0.225593 | 0.045458 | -2.3111  | Down | 0.001544 | 0.003133 |
| LOC100127983 | 1053 | 212     | 42     | 5.850501 | 1.179451 | -2.31044 | Down | 1.01E-28 | 5.26E-28 |
| KLRK1        | 1606 | 50      | 10     | 0.910764 | 0.18455  | -2.30307 | Down | 9.62E-08 | 2.49E-07 |
| SLC16A14     | 4411 | 472     | 95     | 3.102333 | 0.6333   | -2.29239 | Down | 2.76E-61 | 2.35E-60 |
| HIST1H1D     | 777  | 30      | 6      | 1.135691 | 0.232555 | -2.28793 | Down | 4.13E-05 | 9.37E-05 |
| FZD2         | 3834 | 1786    | 360.5  | 13.5451  | 2.780214 | -2.2845  | Down | #####    | #####    |
| SPTSSB       | 2306 | 30      | 6      | 0.375204 | 0.077117 | -2.28255 | Down | 4.13E-05 | 9.37E-05 |
| CLDN11       | 2431 | 607     | 122    | 7.237801 | 1.491838 | -2.27846 | Down | 2.09E-78 | 2.14E-77 |
| TRPV2        | 2829 | 68      | 14     | 0.697941 | 0.143891 | -2.27813 | Down | 6.80E-10 | 1.92E-09 |
| DLGAP5       | 2993 | 1949.5  | 394.5  | 18.86305 | 3.910311 | -2.27021 | Down | #####    | #####    |
| CCNB2        | 1566 | 2109    | 428    | 39.01008 | 8.104143 | -2.26712 | Down | #####    | #####    |
| CDC25B       | 3578 | 13201.5 | 2689   | 107.089  | 22.26138 | -2.26619 | Down | 0        | 0        |
| SLC37A2      | 4196 | 3379    | 690.5  | 23.39734 | 4.872356 | -2.26365 | Down | 0        | 0        |
| HNF4G        | 4101 | 196     | 40     | 1.38376  | 0.288389 | -2.2625  | Down | 4.13E-26 | 2.03E-25 |
| CRISPLD1     | 4334 | 24      | 5      | 0.163097 | 0.034028 | -2.26093 | Down | 0.000325 | 0.000694 |
| HECW1        | 6839 | 560.5   | 116.5  | 2.388274 | 0.500123 | -2.25561 | Down | 7.52E-71 | 7.18E-70 |
| H2AFX        | 1651 | 5776    | 1191.5 | 101.778  | 21.35487 | -2.25279 | Down | 0        | 0        |
| CLDN10       | 2658 | 19      | 4      | 0.209095 | 0.044064 | -2.24647 | Down | 0.001544 | 0.003134 |
| HJURP        | 3065 | 3874.5  | 803    | 36.67246 | 7.746599 | -2.24306 | Down | 0        | 0        |
| IFIH1        | 3434 | 743     | 154    | 6.262051 | 1.325415 | -2.24019 | Down | 2.18E-93 | 2.54E-92 |



|            |      |        |        |          |          |          |      |          |          |
|------------|------|--------|--------|----------|----------|----------|------|----------|----------|
| CCNA2      | 2811 | 4344.5 | 903.5  | 44.832   | 9.52571  | -2.23463 | Down | 0        | 0        |
| FAM72D     | 2393 | 707    | 147    | 8.570411 | 1.823672 | -2.23252 | Down | 9.79E-89 | 1.10E-87 |
| MCM5       | 2568 | 2110   | 441.5  | 23.87703 | 5.082912 | -2.2319  | Down | #####    | #####    |
| MPZ        | 1980 | 171.5  | 36     | 2.510701 | 0.536716 | -2.22586 | Down | 1.86E-22 | 8.43E-22 |
| NDUF4F4    | 2411 | 486.5  | 102    | 5.850885 | 1.252116 | -2.22429 | Down | 4.24E-61 | 3.61E-60 |
| SLC22A18AS | 1565 | 23.5   | 5      | 0.439816 | 0.094235 | -2.22257 | Down | 0.000546 | 0.001149 |
| LPAR6      | 2561 | 317    | 67     | 3.583511 | 0.773441 | -2.21201 | Down | 3.30E-40 | 2.11E-39 |
| ETV1       | 6237 | 9963   | 2106.5 | 46.28735 | 10.00721 | -2.20958 | Down | 0        | 0        |
| CCRL1      | 2224 | 169.5  | 36     | 2.224582 | 0.481694 | -2.20735 | Down | 5.10E-22 | 2.28E-21 |
| SLC1A7     | 2677 | 368    | 79     | 4.000911 | 0.868507 | -2.20372 | Down | 7.32E-46 | 5.10E-45 |
| C8orf31    | 1875 | 102    | 22     | 1.585088 | 0.34547  | -2.19793 | Down | 1.00E-13 | 3.64E-13 |
| FAM72B     | 2374 | 555.5  | 118.5  | 6.797144 | 1.482604 | -2.1968  | Down | 7.75E-69 | 7.23E-68 |
| HMGB3      | 3556 | 1672   | 357    | 13.624   | 2.981577 | -2.192   | Down | #####    | #####    |
| ANXA10     | 1447 | 3710.5 | 797    | 74.311   | 16.30555 | -2.18821 | Down | 0        | 0        |
| AGXT2L1    | 2133 | 23     | 5      | 0.315075 | 0.069141 | -2.18808 | Down | 0.000546 | 0.001149 |
| GDPD3      | 1115 | 37.5   | 8      | 0.968948 | 0.212654 | -2.18791 | Down | 9.25E-06 | 2.18E-05 |
| C4orf36    | 922  | 23     | 5      | 0.721444 | 0.158402 | -2.1873  | Down | 0.000546 | 0.001149 |
| CDCA8      | 2319 | 2543.5 | 547.5  | 31.83814 | 6.999499 | -2.18543 | Down | #####    | #####    |
| FAM50B     | 1618 | 45.5   | 10     | 0.824223 | 0.181412 | -2.18377 | Down | 1.25E-06 | 3.06E-06 |
| OSGIN1     | 1958 | 1274   | 275    | 18.8815  | 4.160179 | -2.18226 | Down | #####    | #####    |
| NCAPH      | 4495 | 1751.5 | 382    | 11.29147 | 2.510833 | -2.169   | Down | #####    | #####    |
| OLR1       | 2417 | 107.5  | 24     | 1.305048 | 0.290749 | -2.16626 | Down | 6.38E-14 | 2.33E-13 |
| DCTPP1     | 1143 | 1438   | 318.5  | 36.54383 | 8.252953 | -2.14665 | Down | #####    | #####    |
| CCNF       | 4287 | 1812   | 402.5  | 12.26094 | 2.78148  | -2.14015 | Down | #####    | #####    |
| MCM7       | 2821 | 11169  | 2481.5 | 114.8674 | 26.08863 | -2.13848 | Down | 0        | 0        |

|           |      |         |        |          |          |          |      |          |          |
|-----------|------|---------|--------|----------|----------|----------|------|----------|----------|
| FDXACB1   | 3081 | 123.5   | 28     | 1.166935 | 0.265174 | -2.13772 | Down | 1.28E-15 | 4.94E-15 |
| CDC42EP4  | 3121 | 2613    | 584.5  | 24.31198 | 5.542814 | -2.13298 | Down | #####    | #####    |
| OSR2      | 1825 | 257.5   | 58.5   | 4.115197 | 0.939669 | -2.13074 | Down | 2.96E-31 | 1.62E-30 |
| TMPO      | 3690 | 6976.5  | 1560.5 | 54.79093 | 12.53914 | -2.1275  | Down | 0        | 0        |
| HIST1H2AG | 498  | 33      | 7.5    | 1.914815 | 0.438461 | -2.12668 | Down | 2.53E-05 | 5.82E-05 |
| CPT1A     | 5260 | 6139    | 1379.5 | 33.86023 | 7.756173 | -2.12617 | Down | 0        | 0        |
| PRC1      | 3011 | 5446.5  | 1224   | 52.44743 | 12.04936 | -2.12192 | Down | 0        | 0        |
| GPRC5C    | 2389 | 7282.5  | 1650   | 88.67473 | 20.40241 | -2.11978 | Down | 0        | 0        |
| C9orf150  | 2718 | 1493.5  | 339    | 15.96918 | 3.686125 | -2.11511 | Down | #####    | #####    |
| OPN1SW    | 1114 | 15      | 3.5    | 0.396579 | 0.092156 | -2.10546 | Down | 0.004425 | 0.008615 |
| FOXF1     | 2579 | 6532.5  | 1490.5 | 73.56119 | 17.11196 | -2.10394 | Down | 0        | 0        |
| IRAK1BP1  | 1157 | 35      | 8      | 0.880383 | 0.204935 | -2.10297 | Down | 2.54E-05 | 5.85E-05 |
| ALX4      | 5466 | 259.5   | 60.5   | 1.384628 | 0.32275  | -2.10101 | Down | 8.06E-31 | 4.35E-30 |
| TROAP     | 2618 | 992     | 229    | 11.01994 | 2.573672 | -2.09822 | Down | #####    | #####    |
| CHRFAM7A  | 2858 | 26      | 6      | 0.268474 | 0.062723 | -2.0977  | Down | 0.000324 | 0.000692 |
| DBP       | 1658 | 170     | 39     | 2.991728 | 0.699329 | -2.09694 | Down | 6.55E-21 | 2.86E-20 |
| GNG2      | 3875 | 2558.5  | 589    | 19.13206 | 4.499725 | -2.08808 | Down | #####    | #####    |
| BANK1     | 3224 | 80.5    | 18.5   | 0.724251 | 0.171072 | -2.08188 | Down | 1.01E-10 | 2.96E-10 |
| NECAB2    | 1636 | 42.5    | 10     | 0.757639 | 0.179416 | -2.07821 | Down | 5.55E-06 | 1.32E-05 |
| RFX5      | 3618 | 2294.5  | 536    | 18.44282 | 4.373706 | -2.07613 | Down | #####    | #####    |
| HIST2H2AC | 437  | 51.5    | 12     | 3.442955 | 0.817153 | -2.07497 | Down | 4.57E-07 | 1.15E-06 |
| FGF1      | 3669 | 648.5   | 151    | 5.121138 | 1.216483 | -2.07375 | Down | 2.80E-74 | 2.77E-73 |
| PDE5A     | 6836 | 17320.5 | 4027.5 | 73.42705 | 17.45173 | -2.07294 | Down | 0        | 0        |
| UNG       | 2166 | 1042.5  | 244    | 13.99073 | 3.327565 | -2.07193 | Down | #####    | #####    |
| LBX2      | 1463 | 34      | 8      | 0.677157 | 0.161092 | -2.0716  | Down | 4.19E-05 | 9.52E-05 |

|          |      |        |       |          |          |          |      |          |          |
|----------|------|--------|-------|----------|----------|----------|------|----------|----------|
| DEPDC1B  | 2330 | 900.5  | 209.5 | 11.19984 | 2.671543 | -2.06773 | Down | #####    | #####    |
| CPXCR1   | 1630 | 17     | 4     | 0.301074 | 0.071855 | -2.06696 | Down | 0.004343 | 0.008462 |
| DSCC1    | 2291 | 611    | 144   | 7.776927 | 1.857931 | -2.0655  | Down | 1.87E-69 | 1.76E-68 |
| HIST1H4C | 390  | 158    | 37    | 11.71829 | 2.80637  | -2.06199 | Down | 3.24E-19 | 1.36E-18 |
| HMG5     | 2126 | 379.5  | 89    | 5.195892 | 1.245805 | -2.06029 | Down | 7.43E-44 | 5.05E-43 |
| OIP5     | 1249 | 451.5  | 106   | 10.47226 | 2.521104 | -2.05444 | Down | 7.80E-52 | 5.90E-51 |
| UHRF1    | 3922 | 3644   | 861.5 | 26.99233 | 6.507923 | -2.05228 | Down | 0        | 0        |
| GALNT14  | 2762 | 20     | 5     | 0.217148 | 0.052359 | -2.05218 | Down | 0.002494 | 0.004968 |
| USP13    | 7933 | 742.5  | 176.5 | 2.715437 | 0.656314 | -2.04873 | Down | 1.69E-83 | 1.81E-82 |
| AURKB    | 1253 | 1394   | 331.5 | 32.31852 | 7.826796 | -2.04587 | Down | #####    | #####    |
| TRIM47   | 2268 | 865.5  | 205   | 11.08775 | 2.685926 | -2.04548 | Down | 4.08E-97 | 4.87E-96 |
| HOXD3    | 2319 | 25.5   | 6     | 0.318917 | 0.077302 | -2.0446  | Down | 0.000535 | 0.001126 |
| C5orf39  | 1280 | 57.5   | 14    | 1.316195 | 0.320818 | -2.03655 | Down | 1.65E-07 | 4.21E-07 |
| FOX1     | 3527 | 5417.5 | 1294  | 44.5552  | 10.87741 | -2.03426 | Down | 0        | 0        |
| BCL2     | 6492 | 127.5  | 30.5  | 0.567832 | 0.138639 | -2.03413 | Down | 1.29E-15 | 4.95E-15 |
| KIF15    | 4857 | 1211   | 289.5 | 7.22706  | 1.766974 | -2.03213 | Down | #####    | #####    |
| UBE2T    | 935  | 1628.5 | 389.5 | 50.47534 | 12.36557 | -2.02925 | Down | #####    | #####    |
| PRTFDC1  | 1926 | 230.5  | 55    | 3.460293 | 0.848238 | -2.02835 | Down | 8.05E-27 | 4.02E-26 |
| HIST1H3H | 473  | 20     | 5     | 1.258293 | 0.308766 | -2.02688 | Down | 0.002494 | 0.004968 |
| SLC40A1  | 3381 | 39     | 9.5   | 0.334986 | 0.082538 | -2.02096 | Down | 9.26E-06 | 2.18E-05 |
| CORO1A   | 1943 | 155.5  | 38    | 2.344522 | 0.578182 | -2.0197  | Down | 3.56E-18 | 1.46E-17 |
| SLCO3A1  | 2853 | 645.5  | 157   | 6.576608 | 1.622732 | -2.01892 | Down | 3.67E-71 | 3.52E-70 |
| ORA1     | 1496 | 779.5  | 189.5 | 15.15217 | 3.739774 | -2.0185  | Down | 7.86E-86 | 8.64E-85 |
| MCM6     | 3769 | 2959.5 | 714.5 | 22.74994 | 5.615938 | -2.01826 | Down | 0        | 0        |
| C1orf106 | 4175 | 111    | 27    | 0.774257 | 0.191504 | -2.01544 | Down | 1.68E-13 | 5.99E-13 |

|          |       |        |        |          |          |          |      |          |          |
|----------|-------|--------|--------|----------|----------|----------|------|----------|----------|
| CENPF    | 10316 | 8512.5 | 2057.5 | 23.8919  | 5.910148 | -2.01526 | Down | 0        | 0        |
| PSMB8    | 1135  | 3667   | 887.5  | 93.67829 | 23.1873  | -2.01438 | Down | 0        | 0        |
| COQ3     | 1265  | 287    | 69     | 6.543659 | 1.620617 | -2.01355 | Down | 6.25E-33 | 3.52E-32 |
| MPV17L2  | 1360  | 799    | 195    | 17.08715 | 4.235456 | -2.01232 | Down | 1.60E-87 | 1.79E-86 |
| PARP9    | 3253  | 1620   | 394.5  | 14.43819 | 3.588533 | -2.00842 | Down | #####    | #####    |
| KLRC3    | 1042  | 106    | 26     | 2.950625 | 0.73405  | -2.00707 | Down | 7.24E-13 | 2.48E-12 |
| ATF7IP   | 4661  | 1554   | 381    | 9.685729 | 2.410137 | -2.00675 | Down | #####    | #####    |
| CDKN3    | 906   | 645.5  | 158    | 20.69712 | 5.162459 | -2.0033  | Down | 9.35E-71 | 8.91E-70 |
| CASP1    | 1301  | 1226.5 | 300.5  | 27.35918 | 6.836755 | -2.00064 | Down | #####    | #####    |
| CBX6     | 3284  | 2758   | 677.5  | 24.43389 | 6.108567 | -1.99998 | Down | #####    | #####    |
| IGFN1    | 11810 | 533    | 132.5  | 1.313429 | 0.328435 | -1.99966 | Down | 3.44E-58 | 2.84E-57 |
| SELENBP1 | 1721  | 1084.5 | 266    | 18.28509 | 4.573925 | -1.99916 | Down | #####    | #####    |
| CENPE    | 8630  | 3261.5 | 799.5  | 10.94481 | 2.752795 | -1.99128 | Down | 0        | 0        |
| IFI44    | 1742  | 1888   | 463    | 31.34453 | 7.884549 | -1.99111 | Down | #####    | #####    |
| MRVI1    | 6165  | 158    | 39.5   | 0.74819  | 0.188564 | -1.98835 | Down | 2.16E-18 | 8.92E-18 |
| HMMR     | 3144  | 2508.5 | 616.5  | 23.08705 | 5.824649 | -1.98684 | Down | #####    | #####    |
| CENPA    | 1431  | 606    | 149.5  | 12.28016 | 3.100177 | -1.98591 | Down | 2.33E-66 | 2.11E-65 |
| NECAB1   | 5140  | 154    | 38     | 0.866509 | 0.21884  | -1.98534 | Down | 5.74E-18 | 2.34E-17 |
| TNFRSF8  | 3686  | 19     | 5      | 0.155138 | 0.039233 | -1.9834  | Down | 0.004077 | 0.007965 |
| CDCA3    | 1170  | 810    | 200.5  | 20.04899 | 5.078192 | -1.98114 | Down | 9.16E-88 | 1.02E-86 |
| BDH2     | 2936  | 751.5  | 185.5  | 7.394498 | 1.876631 | -1.97831 | Down | 1.12E-81 | 1.19E-80 |
| SHISA3   | 1971  | 55     | 14     | 0.823417 | 0.209071 | -1.97763 | Down | 4.30E-07 | 1.08E-06 |
| TACC3    | 2788  | 4575   | 1139   | 47.61245 | 12.09925 | -1.97642 | Down | 0        | 0        |
| GMPR     | 1515  | 598    | 149.5  | 11.50182 | 2.927814 | -1.97397 | Down | 1.03E-64 | 9.12E-64 |
| CMPK2    | 3009  | 94.5   | 24     | 0.918882 | 0.234022 | -1.97324 | Down | 3.47E-11 | 1.03E-10 |

|          |      |         |       |          |          |          |      |          |          |
|----------|------|---------|-------|----------|----------|----------|------|----------|----------|
| FBXW10   | 3449 | 95      | 23.5  | 0.792065 | 0.201842 | -1.97239 | Down | 8.54E-12 | 2.67E-11 |
| GIMAP2   | 1523 | 219.5   | 55    | 4.171985 | 1.063761 | -1.97156 | Down | 1.52E-24 | 7.25E-24 |
| TMC6     | 2789 | 31      | 8     | 0.328466 | 0.083989 | -1.96746 | Down | 0.000182 | 0.000396 |
| RDM1     | 812  | 38.5    | 10    | 1.403056 | 0.35972  | -1.96363 | Down | 3.85E-05 | 8.75E-05 |
| KRT78    | 1785 | 30      | 8     | 0.505288 | 0.129627 | -1.96274 | Down | 0.000294 | 0.000631 |
| FAM86B1  | 2458 | 214     | 54.5  | 2.526256 | 0.649156 | -1.96036 | Down | 6.46E-24 | 3.03E-23 |
| ZNF771   | 1460 | 301     | 76    | 5.986156 | 1.538914 | -1.95972 | Down | 5.41E-33 | 3.05E-32 |
| ZNRF2    | 3485 | 357.5   | 90    | 2.976656 | 0.765418 | -1.95937 | Down | 6.87E-39 | 4.29E-38 |
| HOXD4    | 1298 | 30      | 7.5   | 0.660391 | 0.170429 | -1.95415 | Down | 0.000116 | 0.000256 |
| HSPH1    | 3680 | 10944.5 | 2775  | 86.17215 | 22.36598 | -1.94592 | Down | 0        | 0        |
| SOBP     | 6248 | 1393    | 355   | 6.469476 | 1.68058  | -1.94469 | Down | #####    | #####    |
| CCDC102B | 2722 | 508.5   | 128.5 | 5.403018 | 1.405361 | -1.94282 | Down | 1.15E-54 | 9.02E-54 |
| ZNF467   | 2295 | 67.5    | 17    | 0.853754 | 0.222977 | -1.93693 | Down | 2.18E-08 | 5.78E-08 |
| MTHFD1   | 3466 | 3024    | 773   | 25.28155 | 6.604761 | -1.93651 | Down | 0        | 0        |
| C16orf59 | 1650 | 471     | 121   | 8.276649 | 2.164395 | -1.93508 | Down | 6.77E-50 | 5.00E-49 |
| DBF4     | 3923 | 2047.5  | 523.5 | 15.11488 | 3.963219 | -1.93122 | Down | #####    | #####    |
| VASH2    | 4337 | 89.5    | 23    | 0.599241 | 0.157345 | -1.9292  | Down | 1.49E-10 | 4.32E-10 |
| GBP1     | 3050 | 2082    | 534   | 19.7672  | 5.190844 | -1.92907 | Down | #####    | #####    |
| RPS6KA5  | 2343 | 89      | 23    | 1.101795 | 0.28942  | -1.92862 | Down | 1.49E-10 | 4.32E-10 |
| CENPV    | 1181 | 349     | 90    | 8.576013 | 2.25321  | -1.92833 | Down | 2.90E-37 | 1.77E-36 |
| LNP1     | 2233 | 113     | 29    | 1.467999 | 0.386841 | -1.92404 | Down | 4.09E-13 | 1.43E-12 |
| MCTP2    | 7637 | 921     | 239   | 3.504574 | 0.926794 | -1.91892 | Down | 5.60E-95 | 6.62E-94 |
| HSPA1A   | 2445 | 1262.5  | 328.5 | 14.98884 | 3.972617 | -1.91573 | Down | #####    | #####    |
| TESK2    | 3093 | 478     | 126   | 4.510382 | 1.196288 | -1.91468 | Down | 2.21E-49 | 1.63E-48 |
| ACVRL1   | 4126 | 228.5   | 60    | 1.618124 | 0.430657 | -1.90971 | Down | 2.01E-24 | 9.53E-24 |

|          |      |        |        |          |          |          |      |          |          |
|----------|------|--------|--------|----------|----------|----------|------|----------|----------|
| TONSL    | 4519 | 1468.5 | 383.5  | 9.424963 | 2.508841 | -1.90947 | Down | #####    | #####    |
| PRKACB   | 4317 | 9964   | 2594.5 | 66.88478 | 17.82144 | -1.90806 | Down | 0        | 0        |
| OAS1     | 1673 | 240.5  | 64     | 4.197118 | 1.119271 | -1.90684 | Down | 2.61E-25 | 1.26E-24 |
| KIF18B   | 2669 | 1079.5 | 283    | 11.74671 | 3.139439 | -1.90368 | Down | #####    | #####    |
| C15orf23 | 1763 | 1093   | 286    | 17.99126 | 4.808904 | -1.90352 | Down | #####    | #####    |
| LZTS1    | 5459 | 1682   | 442.5  | 8.96683  | 2.397691 | -1.90295 | Down | #####    | #####    |
| GULP1    | 3464 | 586.5  | 154    | 4.924106 | 1.317656 | -1.90189 | Down | 2.47E-60 | 2.09E-59 |
| LAP3     | 2100 | 3706.5 | 972.5  | 51.28396 | 13.73014 | -1.90116 | Down | 0        | 0        |
| HOXA2    | 1791 | 76     | 20     | 1.22973  | 0.329375 | -1.90054 | Down | 4.59E-09 | 1.25E-08 |
| SOX11    | 8737 | 245    | 64     | 0.808346 | 0.216617 | -1.89983 | Down | 2.60E-26 | 1.28E-25 |
| HEY2     | 2672 | 91     | 24     | 0.992186 | 0.266216 | -1.89801 | Down | 1.42E-10 | 4.12E-10 |
| WDR76    | 4037 | 917    | 239.5  | 6.567154 | 1.762696 | -1.89748 | Down | 3.56E-94 | 4.18E-93 |
| B3GALT2  | 3548 | 41     | 11     | 0.337546 | 0.090881 | -1.89303 | Down | 2.25E-05 | 5.18E-05 |
| MAB21L2  | 2785 | 1431.5 | 378    | 14.923   | 4.024831 | -1.89054 | Down | #####    | #####    |
| VAR3     | 4308 | 9721.5 | 2571.5 | 65.51106 | 17.66887 | -1.89053 | Down | 0        | 0        |
| FOXD2    | 4675 | 118.5  | 31.5   | 0.737227 | 0.198863 | -1.89034 | Down | 2.34E-13 | 8.29E-13 |
| EXOSC4   | 948  | 1108.5 | 294    | 33.98276 | 9.177402 | -1.88865 | Down | #####    | #####    |
| TMEM220  | 3092 | 42     | 11     | 0.391162 | 0.105673 | -1.88816 | Down | 1.40E-05 | 3.26E-05 |
| C14orf93 | 2380 | 180.5  | 48     | 2.206377 | 0.596552 | -1.88696 | Down | 2.35E-19 | 9.87E-19 |
| AKR1C3   | 1224 | 2100   | 554.5  | 49.65683 | 13.4273  | -1.88682 | Down | #####    | #####    |
| GNAL     | 4027 | 39     | 10.5   | 0.281819 | 0.076302 | -1.88497 | Down | 2.39E-05 | 5.49E-05 |
| SDPR     | 3265 | 412.5  | 110.5  | 3.676061 | 0.9964   | -1.88336 | Down | 2.90E-42 | 1.92E-41 |
| NDP      | 2058 | 472    | 126    | 6.65271  | 1.804876 | -1.88204 | Down | 3.48E-48 | 2.52E-47 |
| KPNA2    | 2011 | 11602  | 3085.5 | 167.2125 | 45.46449 | -1.87887 | Down | 0        | 0        |
| HIST1H4A | 372  | 21.5   | 6      | 1.721771 | 0.468423 | -1.87801 | Down | 0.003719 | 0.007307 |

|              |      |         |        |          |          |          |      |          |          |
|--------------|------|---------|--------|----------|----------|----------|------|----------|----------|
| HSD17B11     | 1892 | 513     | 137    | 7.869393 | 2.141981 | -1.87731 | Down | 3.34E-52 | 2.53E-51 |
| STAT1        | 2798 | 7643    | 2035   | 79.16384 | 21.5487  | -1.87724 | Down | 0        | 0        |
| PBK          | 1899 | 3307.5  | 877    | 50.37093 | 13.71117 | -1.87724 | Down | 0        | 0        |
| GSR          | 3015 | 9502    | 2532.5 | 91.43143 | 24.89611 | -1.87677 | Down | 0        | 0        |
| PRMT3        | 2607 | 762     | 203    | 8.455541 | 2.306512 | -1.87418 | Down | 6.89E-77 | 6.96E-76 |
| APEX1        | 1574 | 2758.5  | 737.5  | 50.80193 | 13.87748 | -1.87214 | Down | #####    | #####    |
| ZNF618       | 9133 | 2735    | 735    | 8.704821 | 2.379681 | -1.87105 | Down | #####    | #####    |
| CEP55        | 2656 | 1993.5  | 535    | 21.7674  | 5.975803 | -1.86496 | Down | #####    | #####    |
| TRIL         | 5056 | 44      | 12     | 0.253892 | 0.069779 | -1.86335 | Down | 1.31E-05 | 3.06E-05 |
| DNAJC15      | 2792 | 2530.5  | 680    | 26.29379 | 7.230899 | -1.86248 | Down | #####    | #####    |
| TRIM6-TRIM34 | 3487 | 158.5   | 42.5   | 1.320548 | 0.36319  | -1.86234 | Down | 3.22E-17 | 1.29E-16 |
| KIF22        | 2097 | 2294.5  | 619.5  | 31.78916 | 8.74995  | -1.86119 | Down | #####    | #####    |
| HIST2H2BF    | 999  | 715.5   | 194.5  | 20.8142  | 5.750077 | -1.85591 | Down | 6.10E-71 | 5.83E-70 |
| OAS2         | 3539 | 744     | 204    | 6.119167 | 1.691891 | -1.8547  | Down | 5.82E-73 | 5.69E-72 |
| TOE1         | 2408 | 735     | 201    | 8.865056 | 2.451404 | -1.85452 | Down | 2.70E-72 | 2.62E-71 |
| POP1         | 4701 | 1645.5  | 445    | 10.13997 | 2.804859 | -1.85405 | Down | #####    | #####    |
| HES1         | 1475 | 947.5   | 258    | 18.6626  | 5.171158 | -1.85159 | Down | 5.45E-93 | 6.32E-92 |
| TMEM229B     | 4068 | 303     | 83     | 2.166101 | 0.601732 | -1.84791 | Down | 1.00E-30 | 5.39E-30 |
| INCENP       | 4146 | 2822.5  | 769.5  | 19.75859 | 5.499492 | -1.84511 | Down | #####    | #####    |
| R3HCC1       | 1644 | 1378    | 376    | 24.33099 | 6.777809 | -1.8439  | Down | #####    | #####    |
| MEPE         | 2007 | 274     | 75     | 3.960144 | 1.103652 | -1.84327 | Down | 5.89E-28 | 3.01E-27 |
| TKT          | 2179 | 32870.5 | 8996   | 438.3272 | 122.1718 | -1.8431  | Down | 0        | 0        |
| BIRC5        | 2537 | 3834.5  | 1048   | 43.8993  | 12.25011 | -1.8414  | Down | 0        | 0        |
| SNN          | 3307 | 625     | 171.5  | 5.494403 | 1.537811 | -1.83708 | Down | 1.04E-61 | 8.96E-61 |
| SAMD13       | 1574 | 28.5    | 8      | 0.531104 | 0.148822 | -1.8354  | Down | 0.000753 | 0.001565 |

|          |      |         |        |          |          |          |      |          |          |
|----------|------|---------|--------|----------|----------|----------|------|----------|----------|
| ALDH3A1  | 1789 | 804.5   | 221.5  | 13.08835 | 3.673433 | -1.83308 | Down | 1.68E-78 | 1.72E-77 |
| DIO2     | 6284 | 12650.5 | 3474.5 | 58.39678 | 16.39369 | -1.83275 | Down | 0        | 0        |
| HAND2    | 2368 | 56.5    | 15.5   | 0.694335 | 0.195061 | -1.8317  | Down | 6.54E-07 | 1.63E-06 |
| FBXO43   | 3305 | 55.5    | 15.5   | 0.490424 | 0.13781  | -1.83135 | Down | 1.04E-06 | 2.57E-06 |
| HOXD13   | 2341 | 35.5    | 10     | 0.441568 | 0.124161 | -1.83043 | Down | 0.000156 | 0.000342 |
| RNF157   | 4915 | 1113    | 307.5  | 6.585727 | 1.8519   | -1.83034 | Down | #####    | #####    |
| CHCHD10  | 749  | 20      | 5.5    | 0.768579 | 0.216207 | -1.82978 | Down | 0.002494 | 0.004969 |
| SLC25A35 | 2785 | 97.5    | 27     | 1.01751  | 0.28657  | -1.82808 | Down | 1.18E-10 | 3.44E-10 |
| C20orf27 | 1376 | 2152.5  | 598    | 45.58625 | 12.85372 | -1.82641 | Down | #####    | #####    |
| ABCC2    | 5051 | 504.5   | 140.5  | 2.889818 | 0.815156 | -1.82583 | Down | 2.53E-49 | 1.86E-48 |
| PREX1    | 6633 | 2854    | 792    | 12.51225 | 3.534201 | -1.82389 | Down | #####    | #####    |
| NPTX1    | 5437 | 411     | 114    | 2.194339 | 0.619868 | -1.82375 | Down | 1.37E-40 | 8.84E-40 |
| PRKCDBP  | 1039 | 147.5   | 41     | 4.129659 | 1.167506 | -1.82259 | Down | 2.09E-15 | 7.96E-15 |
| FAIM     | 1538 | 491     | 136    | 9.238743 | 2.614332 | -1.82125 | Down | 3.10E-48 | 2.24E-47 |
| TOP2A    | 5753 | 11562   | 3191.5 | 58.17934 | 16.46676 | -1.82095 | Down | 0        | 0        |
| RFC4     | 1486 | 985.5   | 273    | 19.21841 | 5.439765 | -1.82087 | Down | 5.99E-95 | 7.08E-94 |
| ARAP3    | 5281 | 1094.5  | 304.5  | 6.014321 | 1.704955 | -1.81867 | Down | #####    | #####    |
| RBM47    | 5160 | 1026.5  | 286    | 5.780487 | 1.639297 | -1.81811 | Down | 3.12E-98 | 3.77E-97 |
| USP41    | 9282 | 43      | 12     | 0.133806 | 0.038009 | -1.81572 | Down | 2.09E-05 | 4.82E-05 |
| RTN4IP1  | 2636 | 245.5   | 69     | 2.706318 | 0.769578 | -1.81419 | Down | 1.86E-24 | 8.82E-24 |
| SOX5     | 4333 | 160.5   | 45     | 1.079312 | 0.306984 | -1.81388 | Down | 1.65E-16 | 6.52E-16 |
| NRM      | 1433 | 660     | 185    | 13.41693 | 3.818358 | -1.81303 | Down | 1.85E-63 | 1.61E-62 |
| HMBS     | 1526 | 1572.5  | 440    | 29.95259 | 8.530879 | -1.81191 | Down | #####    | #####    |
| E2F5     | 1594 | 240.5   | 67     | 4.365539 | 1.246241 | -1.80858 | Down | 3.35E-24 | 1.58E-23 |
| AP1AR    | 2812 | 903.5   | 252    | 9.319678 | 2.666281 | -1.80545 | Down | 1.43E-86 | 1.59E-85 |



|          |      |         |        |          |          |          |      |          |          |
|----------|------|---------|--------|----------|----------|----------|------|----------|----------|
| ARHGEF6  | 5282 | 1680    | 471.5  | 9.226105 | 2.641307 | -1.80447 | Down | #####    | #####    |
| BUB1     | 3509 | 2442    | 685.5  | 20.18061 | 5.791795 | -1.80089 | Down | #####    | #####    |
| NQO1     | 2499 | 21409.5 | 6009.5 | 248.6054 | 71.35091 | -1.80085 | Down | 0        | 0        |
| BAG2     | 2068 | 1604.5  | 452    | 22.5322  | 6.473937 | -1.79927 | Down | #####    | #####    |
| NASP     | 2284 | 5961.5  | 1675   | 75.70735 | 21.76975 | -1.79811 | Down | 0        | 0        |
| TOR3A    | 2138 | 1952    | 549.5  | 26.44077 | 7.610753 | -1.79665 | Down | #####    | #####    |
| TTF2     | 4860 | 1439.5  | 406.5  | 8.58784  | 2.476167 | -1.79419 | Down | #####    | #####    |
| PRRT1    | 1931 | 24.5    | 7      | 0.368537 | 0.10633  | -1.79326 | Down | 0.002102 | 0.004219 |
| KIF23    | 3697 | 2741    | 773    | 21.46419 | 6.193624 | -1.79308 | Down | #####    | #####    |
| FAM111B  | 3407 | 887     | 255    | 7.59121  | 2.192915 | -1.79148 | Down | 2.05E-82 | 2.18E-81 |
| IL23R    | 2826 | 53      | 16     | 0.566714 | 0.163753 | -1.7911  | Down | 5.85E-06 | 1.39E-05 |
| LYPD6    | 4101 | 231.5   | 65.5   | 1.634145 | 0.472246 | -1.79092 | Down | 3.63E-23 | 1.67E-22 |
| KLRC2    | 1223 | 394.5   | 111    | 9.355036 | 2.704652 | -1.7903  | Down | 2.33E-38 | 1.44E-37 |
| STXBP5L  | 9382 | 452     | 129    | 1.401991 | 0.406227 | -1.78712 | Down | 3.57E-43 | 2.40E-42 |
| DRD1     | 3373 | 25      | 7      | 0.214442 | 0.062146 | -1.78685 | Down | 0.001319 | 0.002692 |
| IRF2BPL  | 4166 | 4565    | 1304.5 | 31.87226 | 9.269514 | -1.78174 | Down | 0        | 0        |
| RPP40    | 1174 | 455.5   | 130    | 11.23934 | 3.273432 | -1.77968 | Down | 2.13E-43 | 1.44E-42 |
| HIST1H4K | 354  | 42      | 12     | 3.449001 | 1.004702 | -1.77941 | Down | 3.31E-05 | 7.54E-05 |
| TCF7     | 2839 | 1023    | 294    | 10.47306 | 3.058975 | -1.77556 | Down | 8.29E-95 | 9.76E-94 |
| C18orf34 | 3398 | 111     | 32     | 0.951302 | 0.278274 | -1.7734  | Down | 1.33E-11 | 4.10E-11 |
| C12orf48 | 3081 | 743.5   | 213    | 7.00006  | 2.049256 | -1.77227 | Down | 1.55E-69 | 1.46E-68 |
| PKN3     | 3385 | 327     | 94.5   | 2.810627 | 0.823097 | -1.77176 | Down | 1.91E-31 | 1.04E-30 |
| PIF1     | 2659 | 464.5   | 134    | 5.079336 | 1.488255 | -1.77102 | Down | 1.01E-43 | 6.84E-43 |
| GINS2    | 1196 | 1201    | 346    | 29.14755 | 8.563034 | -1.76718 | Down | #####    | #####    |
| FBXO24   | 2292 | 58      | 17.5   | 0.751652 | 0.221146 | -1.76507 | Down | 1.40E-06 | 3.42E-06 |

|           |      |        |        |          |          |          |      |          |          |
|-----------|------|--------|--------|----------|----------|----------|------|----------|----------|
| LBR       | 3837 | 3004   | 862.5  | 22.69931 | 6.67847  | -1.76506 | Down | #####    | #####    |
| LYPD1     | 2683 | 3072   | 886.5  | 33.2734  | 9.794499 | -1.76433 | Down | #####    | #####    |
| FBXO30    | 4420 | 1580   | 455.5  | 10.37264 | 3.0548   | -1.76363 | Down | #####    | #####    |
| PRR11     | 6487 | 5478   | 1583   | 24.51527 | 7.230531 | -1.76151 | Down | 0        | 0        |
| TYW3      | 3353 | 1600   | 462    | 13.83966 | 4.084042 | -1.76074 | Down | #####    | #####    |
| RGS18     | 2158 | 27     | 8      | 0.364245 | 0.107885 | -1.75542 | Down | 0.001193 | 0.002444 |
| FCHO1     | 3235 | 26     | 8      | 0.240734 | 0.071525 | -1.75092 | Down | 0.001878 | 0.003782 |
| PGD       | 1937 | 5547.5 | 1616.5 | 83.10631 | 24.71374 | -1.74964 | Down | 0        | 0        |
| C6orf168  | 9773 | 166    | 49     | 0.495887 | 0.147651 | -1.74782 | Down | 2.92E-16 | 1.15E-15 |
| MCCC2     | 3696 | 3899.5 | 1140.5 | 30.60756 | 9.137585 | -1.744   | Down | 0        | 0        |
| NUP88     | 2518 | 2008.5 | 588.5  | 23.13264 | 6.916699 | -1.74177 | Down | #####    | #####    |
| RTP4      | 1027 | 182    | 55     | 5.205302 | 1.558697 | -1.73964 | Down | 2.97E-17 | 1.19E-16 |
| CMTM1     | 786  | 124.5  | 37     | 4.606813 | 1.383367 | -1.73558 | Down | 2.29E-12 | 7.55E-12 |
| C11orf71  | 680  | 49.5   | 14.5   | 2.115292 | 0.635686 | -1.73447 | Down | 7.07E-06 | 1.68E-05 |
| FAM46B    | 2391 | 49.5   | 14.5   | 0.603508 | 0.181388 | -1.7343  | Down | 7.07E-06 | 1.68E-05 |
| PAX6      | 6883 | 135.5  | 40     | 0.568029 | 0.171203 | -1.73026 | Down | 1.94E-13 | 6.91E-13 |
| GABRQ     | 2000 | 168    | 50     | 2.444188 | 0.737389 | -1.72886 | Down | 2.68E-16 | 1.05E-15 |
| PLAU      | 2395 | 13681  | 4049   | 165.7633 | 50.05115 | -1.72765 | Down | 0        | 0        |
| STOX2     | 4654 | 132    | 40     | 0.830918 | 0.251046 | -1.72675 | Down | 7.21E-13 | 2.47E-12 |
| BRIX1     | 1303 | 2338   | 689.5  | 51.95159 | 15.71146 | -1.72535 | Down | #####    | #####    |
| TIMELESS  | 5154 | 2994   | 890    | 16.85614 | 5.109997 | -1.72188 | Down | #####    | #####    |
| IFIT1     | 1876 | 515    | 155    | 8.023772 | 2.434709 | -1.72053 | Down | 3.38E-46 | 2.36E-45 |
| ATIC      | 2094 | 3161   | 943.5  | 43.75027 | 13.34842 | -1.71262 | Down | #####    | #####    |
| SPC24     | 654  | 546.5  | 163.5  | 24.31549 | 7.423354 | -1.71173 | Down | 2.52E-49 | 1.85E-48 |
| ARHGAP11A | 5616 | 4473   | 1335   | 23.07824 | 7.05317  | -1.71019 | Down | 0        | 0        |

|            |      |        |        |          |          |          |      |          |          |
|------------|------|--------|--------|----------|----------|----------|------|----------|----------|
| HOXA11     | 2653 | 40     | 12     | 0.436569 | 0.133522 | -1.70913 | Down | 8.17E-05 | 0.000182 |
| RFC3       | 2396 | 1724.5 | 515.5  | 20.8308  | 6.377221 | -1.70772 | Down | #####    | #####    |
| SOX12      | 4645 | 1113.5 | 336    | 6.974753 | 2.13639  | -1.70697 | Down | 1.83E-97 | 2.19E-96 |
| CHAC2      | 1305 | 180    | 54     | 3.996487 | 1.224235 | -1.70685 | Down | 3.26E-17 | 1.31E-16 |
| SLC5A6     | 3272 | 1577.5 | 475    | 13.97272 | 4.30334  | -1.69908 | Down | #####    | #####    |
| BFSP1      | 2215 | 656.5  | 200    | 8.627707 | 2.662608 | -1.69614 | Down | 1.59E-57 | 1.30E-56 |
| GEMIN6     | 705  | 516    | 156.5  | 21.26548 | 6.564649 | -1.69572 | Down | 4.75E-46 | 3.31E-45 |
| TUBG1      | 1968 | 2899.5 | 880    | 42.80495 | 13.23234 | -1.69371 | Down | #####    | #####    |
| FAM78A     | 3957 | 54.5   | 16.5   | 0.40169  | 0.124221 | -1.69317 | Down | 3.75E-06 | 9.02E-06 |
| TSPAN15    | 1726 | 1014.5 | 309    | 17.11563 | 5.299067 | -1.6915  | Down | 5.34E-88 | 5.96E-87 |
| PFAS       | 5400 | 1713.5 | 519.5  | 9.180935 | 2.848105 | -1.68864 | Down | #####    | #####    |
| HS3ST1     | 1965 | 69.5   | 21     | 1.024969 | 0.318206 | -1.68755 | Down | 2.51E-07 | 6.38E-07 |
| SUOX       | 2564 | 595.5  | 180    | 6.723697 | 2.087699 | -1.68734 | Down | 8.40E-53 | 6.43E-52 |
| KYNU       | 1774 | 3088   | 937    | 50.44779 | 15.66682 | -1.68708 | Down | #####    | #####    |
| KLHL23     | 4089 | 225.5  | 68.5   | 1.599652 | 0.496953 | -1.68658 | Down | 5.59E-21 | 2.44E-20 |
| PTGER2     | 2494 | 239.5  | 73.5   | 2.793691 | 0.869026 | -1.6847  | Down | 6.20E-22 | 2.77E-21 |
| SLC20A1    | 3390 | 21558  | 6562   | 184.3524 | 57.36572 | -1.68421 | Down | 0        | 0        |
| KIF11      | 5101 | 4404.5 | 1339.5 | 25.03799 | 7.792602 | -1.68394 | Down | 0        | 0        |
| TBXAS1     | 2385 | 896    | 274    | 10.91245 | 3.39693  | -1.68367 | Down | 1.19E-77 | 1.21E-76 |
| ST6GALNAC4 | 1717 | 956    | 293    | 16.21055 | 5.047734 | -1.68323 | Down | 1.62E-82 | 1.73E-81 |
| DLX1       | 2203 | 810.5  | 247    | 10.6709  | 3.323411 | -1.68295 | Down | 1.33E-70 | 1.27E-69 |
| TIMM10     | 684  | 810    | 248    | 34.42015 | 10.73364 | -1.68111 | Down | 2.85E-70 | 2.70E-69 |
| RUNX3      | 4340 | 323.5  | 99     | 2.164882 | 0.675595 | -1.68006 | Down | 5.50E-29 | 2.87E-28 |
| GABRG2     | 4077 | 104    | 32     | 0.737046 | 0.230876 | -1.67464 | Down | 2.88E-10 | 8.23E-10 |
| TSGA14     | 3526 | 1201.5 | 369.5  | 9.886744 | 3.102983 | -1.67184 | Down | #####    | #####    |

|          |      |        |        |          |          |          |      |          |          |
|----------|------|--------|--------|----------|----------|----------|------|----------|----------|
| FAM133A  | 3292 | 107    | 33     | 0.945217 | 0.29689  | -1.67072 | Down | 1.69E-10 | 4.88E-10 |
| CACYBP   | 2875 | 5011.5 | 1542.5 | 50.522   | 15.91313 | -1.66669 | Down | 0        | 0        |
| HAUS1    | 1145 | 440    | 137    | 11.1891  | 3.534412 | -1.66255 | Down | 3.34E-38 | 2.06E-37 |
| FAM65C   | 4292 | 62     | 20     | 0.426349 | 0.13511  | -1.6579  | Down | 2.43E-06 | 5.89E-06 |
| C11orf48 | 1357 | 1052.5 | 326    | 22.49166 | 7.127661 | -1.65789 | Down | 1.89E-89 | 2.14E-88 |
| GLDN     | 5084 | 250.5  | 78     | 1.430884 | 0.45388  | -1.65653 | Down | 2.46E-22 | 1.11E-21 |
| GSG2     | 2797 | 337    | 105    | 3.502963 | 1.111364 | -1.65624 | Down | 1.29E-29 | 6.83E-29 |
| FOPNL    | 2250 | 2544.5 | 789.5  | 32.78459 | 10.40959 | -1.6551  | Down | #####    | #####    |
| CIITA    | 4654 | 71     | 23     | 0.450882 | 0.143244 | -1.65427 | Down | 4.76E-07 | 1.19E-06 |
| LTV1     | 1835 | 1157   | 360    | 18.27734 | 5.809605 | -1.65354 | Down | 1.02E-97 | 1.22E-96 |
| PIR      | 1542 | 1418   | 441.5  | 26.67741 | 8.489064 | -1.65194 | Down | #####    | #####    |
| STMN1    | 1730 | 4402.5 | 1374   | 73.80355 | 23.5355  | -1.64885 | Down | 0        | 0        |
| EBF1     | 5288 | 941.5  | 294    | 5.162222 | 1.646351 | -1.64872 | Down | 2.00E-79 | 2.07E-78 |
| LIPE     | 3806 | 168    | 54     | 1.296446 | 0.4145   | -1.64512 | Down | 5.49E-15 | 2.07E-14 |
| TRAM1L1  | 2037 | 111    | 35     | 1.586904 | 0.507499 | -1.64474 | Down | 1.37E-10 | 3.97E-10 |
| CALHM2   | 1966 | 336.5  | 106.5  | 4.972429 | 1.593723 | -1.64155 | Down | 4.14E-29 | 2.17E-28 |
| HERC5    | 3525 | 672    | 211.5  | 5.52333  | 1.772129 | -1.64005 | Down | 6.87E-57 | 5.55E-56 |
| B3GALNT1 | 3292 | 1929   | 607    | 17.0031  | 5.455623 | -1.63998 | Down | #####    | #####    |
| GSTA4    | 1352 | 243.5  | 77     | 5.222482 | 1.675826 | -1.63986 | Down | 2.26E-21 | 9.96E-21 |
| BUB1B    | 3749 | 2190.5 | 685.5  | 16.91207 | 5.428277 | -1.63949 | Down | #####    | #####    |
| RAB26    | 1641 | 222.5  | 70.5   | 3.943313 | 1.266565 | -1.63849 | Down | 9.14E-20 | 3.89E-19 |
| HOXC8    | 2290 | 987    | 312    | 12.5469  | 4.036235 | -1.63625 | Down | 4.68E-82 | 4.96E-81 |
| POP5     | 660  | 635.5  | 200.5  | 27.88237 | 8.972968 | -1.6357  | Down | 1.18E-53 | 9.14E-53 |
| NEIL3    | 2402 | 440.5  | 139    | 5.311317 | 1.711271 | -1.634   | Down | 1.47E-37 | 8.99E-37 |
| LSM2     | 907  | 1187   | 373.5  | 37.94192 | 12.23157 | -1.63318 | Down | 5.05E-99 | 6.12E-98 |

|          |       |        |       |          |          |          |      |          |          |
|----------|-------|--------|-------|----------|----------|----------|------|----------|----------|
| SLC2A12  | 5599  | 319    | 102   | 1.667118 | 0.537899 | -1.63195 | Down | 2.78E-27 | 1.40E-26 |
| LIMD2    | 3232  | 806    | 256   | 7.247064 | 2.341197 | -1.63015 | Down | 5.97E-67 | 5.47E-66 |
| CDC25C   | 1896  | 403.5  | 128   | 6.192961 | 2.00168  | -1.62942 | Down | 2.56E-34 | 1.48E-33 |
| UBE2C    | 520   | 3305.5 | 1050  | 184.768  | 59.78955 | -1.62775 | Down | #####    | #####    |
| FAH      | 1810  | 1069.5 | 341   | 17.18881 | 5.562906 | -1.62756 | Down | 9.57E-88 | 1.07E-86 |
| BAHCC1   | 10342 | 1561.5 | 498.5 | 4.398014 | 1.423543 | -1.62737 | Down | #####    | #####    |
| RNF26    | 2803  | 2842.5 | 904.5 | 29.48984 | 9.551981 | -1.62635 | Down | #####    | #####    |
| CDC7     | 3316  | 876    | 278   | 7.657423 | 2.485867 | -1.62311 | Down | 1.10E-72 | 1.07E-71 |
| GOLGA6L3 | 1361  | 88.5   | 28    | 1.880612 | 0.610812 | -1.6224  | Down | 1.37E-08 | 3.66E-08 |
| MARS2    | 3102  | 357    | 114   | 3.348927 | 1.088775 | -1.62099 | Down | 2.16E-30 | 1.16E-29 |
| FAM83D   | 2445  | 2187.5 | 699.5 | 26.02195 | 8.4635   | -1.6204  | Down | #####    | #####    |
| ISOC1    | 1942  | 672.5  | 215   | 10.06234 | 3.274315 | -1.6197  | Down | 1.29E-55 | 1.02E-54 |
| MIIP     | 1588  | 158.5  | 51    | 2.90333  | 0.945111 | -1.61915 | Down | 4.11E-14 | 1.51E-13 |
| CYP4F11  | 3395  | 24.5   | 8     | 0.209954 | 0.068365 | -1.61874 | Down | 0.004551 | 0.008848 |
| PDE1A    | 2009  | 172    | 55    | 2.491118 | 0.812482 | -1.61639 | Down | 2.12E-15 | 8.09E-15 |
| KIFC1    | 2721  | 1947.5 | 623.5 | 20.77495 | 6.776395 | -1.61626 | Down | #####    | #####    |
| ZNF174   | 2498  | 334    | 107   | 3.889178 | 1.269265 | -1.61547 | Down | 1.99E-28 | 1.03E-27 |
| MEIS1    | 3198  | 503    | 161   | 4.554023 | 1.486982 | -1.61475 | Down | 4.92E-42 | 3.25E-41 |
| ADAT3    | 1597  | 169    | 54    | 3.070555 | 1.003081 | -1.61406 | Down | 3.60E-15 | 1.37E-14 |
| FAM26E   | 3556  | 703    | 224.5 | 5.730539 | 1.872078 | -1.61403 | Down | 2.16E-58 | 1.79E-57 |
| RUVBL1   | 1785  | 2208.5 | 708   | 35.92958 | 11.74222 | -1.61347 | Down | #####    | #####    |
| FGF7     | 3936  | 2468   | 787.5 | 18.14805 | 5.934272 | -1.61267 | Down | #####    | #####    |
| RHOJ     | 1905  | 275    | 88.5  | 4.188648 | 1.372219 | -1.60997 | Down | 1.03E-23 | 4.82E-23 |
| RANBP3L  | 2635  | 269.5  | 87    | 2.979523 | 0.976138 | -1.60992 | Down | 6.13E-23 | 2.81E-22 |
| SSX2B    | 1306  | 444.5  | 143   | 9.890137 | 3.24199  | -1.60911 | Down | 5.09E-37 | 3.09E-36 |

|          |      |         |        |          |          |          |      |          |          |
|----------|------|---------|--------|----------|----------|----------|------|----------|----------|
| SQRDL    | 1682 | 2139.5  | 688    | 36.84652 | 12.108   | -1.60557 | Down | #####    | #####    |
| APOBEC3B | 1536 | 827.5   | 265.5  | 15.61597 | 5.136842 | -1.60407 | Down | 6.52E-68 | 6.03E-67 |
| LRR1     | 1760 | 417.5   | 134    | 6.877321 | 2.263089 | -1.60355 | Down | 5.79E-35 | 3.39E-34 |
| MIS18BP1 | 4792 | 802.5   | 260.5  | 4.871033 | 1.603062 | -1.6034  | Down | 5.68E-65 | 5.07E-64 |
| KIF14    | 7293 | 2447    | 787    | 9.727552 | 3.201699 | -1.60324 | Down | #####    | #####    |
| XAF1     | 3581 | 1005    | 324    | 8.128035 | 2.675639 | -1.60302 | Down | 1.58E-81 | 1.67E-80 |
| ALKBH2   | 953  | 299     | 96.5   | 9.108605 | 2.999312 | -1.6026  | Down | 1.52E-25 | 7.36E-25 |
| CRYZ     | 2317 | 919     | 296    | 11.50296 | 3.788856 | -1.60217 | Down | 8.60E-75 | 8.54E-74 |
| LRRCC1   | 3876 | 500     | 162    | 3.751204 | 1.237292 | -1.60017 | Down | 3.52E-41 | 2.29E-40 |
| C5orf56  | 822  | 408     | 132.5  | 14.44154 | 4.767513 | -1.59892 | Down | 5.78E-34 | 3.33E-33 |
| TIGD1    | 2448 | 157.5   | 51     | 1.863526 | 0.615426 | -1.59838 | Down | 6.24E-14 | 2.27E-13 |
| LGALS9   | 1835 | 258     | 83.5   | 4.080994 | 1.348097 | -1.598   | Down | 3.34E-22 | 1.50E-21 |
| SIX1     | 2687 | 165.5   | 53.5   | 1.792008 | 0.592124 | -1.5976  | Down | 9.33E-15 | 3.49E-14 |
| ZWINT    | 1687 | 3084    | 997    | 52.97778 | 17.51362 | -1.59691 | Down | #####    | #####    |
| SOX15    | 1394 | 47.5    | 15.5   | 0.997551 | 0.329812 | -1.59675 | Down | 3.76E-05 | 8.56E-05 |
| CCT5     | 3403 | 14258   | 4608.5 | 121.441  | 40.15502 | -1.5966  | Down | 0        | 0        |
| HMGB1    | 3428 | 25443.5 | 8225   | 215.1317 | 71.20029 | -1.59526 | Down | 0        | 0        |
| CHEK1    | 2748 | 1390    | 451    | 14.64629 | 4.853084 | -1.59356 | Down | #####    | #####    |
| PER3     | 6203 | 452.5   | 149.5  | 2.133667 | 0.707002 | -1.59355 | Down | 1.34E-36 | 8.10E-36 |
| GCLM     | 3074 | 4606    | 1492   | 43.42618 | 14.40526 | -1.59197 | Down | 0        | 0        |
| KIAA0930 | 6215 | 8224.5  | 2676   | 38.40102 | 12.73854 | -1.59195 | Down | 0        | 0        |
| UGT1A4   | 2374 | 273     | 89.5   | 3.350195 | 1.112105 | -1.59095 | Down | 4.89E-23 | 2.25E-22 |
| ELAC2    | 3694 | 3151    | 1025   | 24.78766 | 8.230644 | -1.59054 | Down | #####    | #####    |
| KAT2A    | 3127 | 1889.5  | 615    | 17.51565 | 5.820924 | -1.58932 | Down | #####    | #####    |
| CENPH    | 1405 | 1075    | 349.5  | 22.21044 | 7.381163 | -1.58932 | Down | 2.53E-86 | 2.79E-85 |

|         |       |        |        |          |          |          |      |          |          |
|---------|-------|--------|--------|----------|----------|----------|------|----------|----------|
| CYP26B1 | 4534  | 44     | 14.5   | 0.283628 | 0.094392 | -1.58727 | Down | 6.53E-05 | 0.000147 |
| C1QBP   | 1163  | 5078   | 1653.5 | 126.5628 | 42.14971 | -1.58626 | Down | 0        | 0        |
| HR      | 5528  | 181    | 59     | 0.950996 | 0.31672  | -1.58623 | Down | 8.88E-16 | 3.43E-15 |
| SPAG5   | 3824  | 4064.5 | 1328.5 | 30.84638 | 10.28624 | -1.58439 | Down | 0        | 0        |
| TMEM177 | 1759  | 235.5  | 77     | 3.881232 | 1.294582 | -1.58403 | Down | 6.37E-20 | 2.73E-19 |
| IFI35   | 1260  | 1360   | 444.5  | 31.33541 | 10.45218 | -1.58399 | Down | #####    | #####    |
| FIGN    | 4535  | 415.5  | 138    | 2.68658  | 0.896539 | -1.58333 | Down | 2.27E-33 | 1.29E-32 |
| UGT2B7  | 1899  | 31.5   | 11     | 0.50124  | 0.167537 | -1.58102 | Down | 0.001914 | 0.003851 |
| SSX1    | 1271  | 36.5   | 12     | 0.83708  | 0.27983  | -1.58081 | Down | 0.00047  | 0.000994 |
| RRS1    | 1724  | 2004   | 657    | 33.74626 | 11.29046 | -1.57962 | Down | #####    | #####    |
| ANGPTL1 | 3555  | 1026   | 336.5  | 8.359526 | 2.797107 | -1.57949 | Down | 1.42E-81 | 1.50E-80 |
| PLEKHA4 | 2808  | 1435   | 471.5  | 14.86908 | 4.977108 | -1.57894 | Down | #####    | #####    |
| CRTAM   | 2422  | 24     | 8      | 0.287113 | 0.096125 | -1.57864 | Down | 0.004551 | 0.008848 |
| MON1A   | 2244  | 563    | 185.5  | 7.284243 | 2.439075 | -1.57844 | Down | 2.34E-45 | 1.62E-44 |
| LONRF2  | 13920 | 108.5  | 35.5   | 0.22663  | 0.076076 | -1.57483 | Down | 4.86E-10 | 1.38E-09 |
| PPM1L   | 3056  | 234.5  | 78     | 2.233869 | 0.749927 | -1.57472 | Down | 1.94E-19 | 8.20E-19 |
| METTL12 | 1382  | 57.5   | 19     | 1.201616 | 0.403853 | -1.57307 | Down | 9.78E-06 | 2.29E-05 |
| CKS1B   | 834   | 2447.5 | 803.5  | 85.07208 | 28.59555 | -1.57289 | Down | #####    | #####    |
| IDH1    | 2339  | 5015.5 | 1651   | 62.20858 | 20.91732 | -1.57242 | Down | 0        | 0        |
| SUV39H1 | 2745  | 1043.5 | 343.5  | 11.01515 | 3.706409 | -1.5714  | Down | 1.86E-82 | 1.99E-81 |
| GLMN    | 2042  | 560    | 184    | 7.918281 | 2.667872 | -1.5695  | Down | 3.95E-45 | 2.73E-44 |
| GINS1   | 3289  | 1720   | 569.5  | 15.18564 | 5.122778 | -1.56771 | Down | #####    | #####    |
| SLC4A8  | 4010  | 82     | 28     | 0.600747 | 0.20267  | -1.56763 | Down | 1.68E-07 | 4.28E-07 |
| RFC5    | 2486  | 844.5  | 278.5  | 9.852351 | 3.324519 | -1.56732 | Down | 6.24E-67 | 5.71E-66 |
| FMO4    | 2148  | 106    | 36     | 1.450586 | 0.490073 | -1.56557 | Down | 2.25E-09 | 6.21E-09 |

|                 |       |        |        |          |          |          |      |          |          |
|-----------------|-------|--------|--------|----------|----------|----------|------|----------|----------|
| GYG2            | 3411  | 356.5  | 119    | 3.045494 | 1.029602 | -1.56459 | Down | 1.14E-28 | 5.93E-28 |
| CEP97           | 4439  | 460.5  | 153.5  | 3.015596 | 1.020145 | -1.56367 | Down | 8.40E-37 | 5.08E-36 |
| KIAA0101        | 1345  | 1855   | 615    | 40.05635 | 13.55652 | -1.56304 | Down | #####    | #####    |
| PHOSPHO2-KLHL23 | 4206  | 189    | 62.5   | 1.302744 | 0.441018 | -1.56264 | Down | 2.73E-16 | 1.07E-15 |
| H1F0            | 2336  | 496    | 165    | 6.171938 | 2.090116 | -1.56214 | Down | 1.52E-39 | 9.58E-39 |
| CBR3            | 1128  | 592    | 196.5  | 15.21293 | 5.155192 | -1.5612  | Down | 3.70E-47 | 2.62E-46 |
| MBNL3           | 11272 | 552.5  | 183    | 1.421573 | 0.481753 | -1.56112 | Down | 5.18E-44 | 3.53E-43 |
| TMEM53          | 1614  | 152.5  | 51     | 2.751336 | 0.932547 | -1.56088 | Down | 4.93E-13 | 1.71E-12 |
| PHF19           | 1001  | 2713   | 902.5  | 78.73466 | 26.69038 | -1.56068 | Down | #####    | #####    |
| CKAP2L          | 3273  | 1782   | 591.5  | 15.79442 | 5.363225 | -1.55824 | Down | #####    | #####    |
| RTEL1           | 5042  | 2370.5 | 791    | 13.64539 | 4.635587 | -1.55759 | Down | #####    | #####    |
| SUN3            | 1452  | 26     | 9      | 0.533184 | 0.181246 | -1.55668 | Down | 0.003933 | 0.007698 |
| CARD9           | 2147  | 25.5   | 8.5    | 0.346603 | 0.11784  | -1.55646 | Down | 0.002935 | 0.005814 |
| ECT2            | 3916  | 2971   | 989.5  | 21.99641 | 7.479914 | -1.55617 | Down | #####    | #####    |
| PLK4            | 3870  | 987    | 329.5  | 7.405713 | 2.5186   | -1.55602 | Down | 8.74E-77 | 8.83E-76 |
| MSX1            | 1940  | 601    | 200.5  | 9.007527 | 3.065942 | -1.5548  | Down | 1.54E-47 | 1.10E-46 |
| MUM1            | 4119  | 1327.5 | 443    | 9.351798 | 3.184004 | -1.5544  | Down | #####    | #####    |
| XRCC6BP1        | 1182  | 267    | 89     | 6.538455 | 2.22744  | -1.55356 | Down | 5.77E-22 | 2.58E-21 |
| SSX2            | 1322  | 836    | 277.5  | 18.27822 | 6.228204 | -1.55324 | Down | 8.15E-66 | 7.34E-65 |
| DUSP23          | 718   | 103    | 35     | 4.218174 | 1.437805 | -1.55275 | Down | 3.86E-09 | 1.05E-08 |
| CKAP2           | 3733  | 3716   | 1237.5 | 28.84186 | 9.831543 | -1.55267 | Down | #####    | #####    |
| GRK6            | 2952  | 2064.5 | 692    | 20.34264 | 6.939095 | -1.55169 | Down | #####    | #####    |
| C4orf46         | 3525  | 952    | 319    | 7.840911 | 2.674684 | -1.55165 | Down | 1.26E-73 | 1.24E-72 |
| FANCD2          | 5204  | 1537.5 | 513    | 8.570243 | 2.924612 | -1.55109 | Down | #####    | #####    |
| TTC35           | 1268  | 1454.5 | 484    | 33.16169 | 11.31771 | -1.55094 | Down | #####    | #####    |



|              |      |        |         |          |          |          |      |          |          |
|--------------|------|--------|---------|----------|----------|----------|------|----------|----------|
| EEF1E1       | 609  | 1000   | 334     | 47.59293 | 16.26915 | -1.54861 | Down | 1.43E-77 | 1.45E-76 |
| POLR3K       | 824  | 915    | 306.5   | 32.24993 | 11.02937 | -1.54795 | Down | 5.16E-71 | 4.94E-70 |
| C9orf40      | 2335 | 539.5  | 180     | 6.681009 | 2.286008 | -1.54724 | Down | 1.28E-42 | 8.53E-42 |
| MRPS12       | 991  | 1314.5 | 443     | 38.53833 | 13.18851 | -1.54701 | Down | #####    | 4.95E-99 |
| PA2G4        | 2643 | 6441.5 | 2156.5  | 70.65484 | 24.18158 | -1.54688 | Down | 0        | 0        |
| C9orf84      | 4630 | 73     | 25      | 0.461563 | 0.158026 | -1.54636 | Down | 8.51E-07 | 2.11E-06 |
| CHN1         | 2446 | 765.5  | 258     | 9.082546 | 3.110146 | -1.54611 | Down | 5.15E-59 | 4.30E-58 |
| MRPL50       | 1050 | 570.5  | 190.5   | 15.75817 | 5.398097 | -1.54558 | Down | 4.43E-45 | 3.06E-44 |
| SLC12A8      | 3510 | 2297   | 772     | 19.02136 | 6.520252 | -1.54462 | Down | #####    | #####    |
| HSPA8        | 2276 | 68192  | 22879.5 | 868.366  | 297.6967 | -1.54446 | Down | 0        | 0        |
| VAV3         | 3115 | 192.5  | 65      | 1.799969 | 0.617315 | -1.54389 | Down | 6.50E-16 | 2.53E-15 |
| NSMCE4A      | 1420 | 435.5  | 147     | 8.918357 | 3.059662 | -1.54341 | Down | 3.39E-34 | 1.96E-33 |
| UBE2S        | 1207 | 6685.5 | 2254.5  | 160.9917 | 55.25669 | -1.54277 | Down | 0        | 0        |
| ZIC1         | 5231 | 313.5  | 106     | 1.741002 | 0.597856 | -1.54205 | Down | 5.53E-25 | 2.65E-24 |
| FAM125A      | 1216 | 1147   | 388     | 27.43288 | 9.420589 | -1.54202 | Down | 3.05E-87 | 3.39E-86 |
| NPB          | 634  | 54     | 18.5    | 2.470577 | 0.848482 | -1.54189 | Down | 1.69E-05 | 3.92E-05 |
| C13orf15     | 1126 | 92     | 31      | 2.364991 | 0.812807 | -1.54085 | Down | 2.20E-08 | 5.85E-08 |
| BOP1         | 2422 | 4127.5 | 1395    | 49.55493 | 17.03436 | -1.54058 | Down | 0        | 0        |
| HSPD1        | 2319 | 21935  | 7372    | 274.0603 | 94.22383 | -1.54033 | Down | 0        | 0        |
| MEGF9        | 6227 | 1607.5 | 542     | 7.490547 | 2.577807 | -1.53893 | Down | #####    | #####    |
| CKS2         | 627  | 2709   | 912.5   | 125.2575 | 43.21495 | -1.53529 | Down | #####    | #####    |
| LOC100130921 | 582  | 26.5   | 9       | 1.324627 | 0.457101 | -1.535   | Down | 0.003933 | 0.007697 |
| PSMB9        | 1048 | 4023.5 | 1361.5  | 111.501  | 38.49085 | -1.53447 | Down | #####    | #####    |
| C7orf31      | 3609 | 439.5  | 149.5   | 3.534249 | 1.221512 | -1.53273 | Down | 2.65E-34 | 1.53E-33 |
| STEAP1       | 1330 | 998.5  | 337.5   | 21.7809  | 7.533206 | -1.53173 | Down | 2.53E-76 | 2.54E-75 |

|           |      |         |        |          |          |          |      |          |          |
|-----------|------|---------|--------|----------|----------|----------|------|----------|----------|
| SLC7A8    | 3145 | 165     | 57     | 1.537913 | 0.531937 | -1.53165 | Down | 1.53E-13 | 5.49E-13 |
| GINS3     | 2297 | 440     | 149.5  | 5.559018 | 1.923267 | -1.53127 | Down | 1.77E-34 | 1.03E-33 |
| IL22RA1   | 2988 | 77      | 26.5   | 0.751051 | 0.259866 | -1.53114 | Down | 3.28E-07 | 8.27E-07 |
| C14orf159 | 3164 | 761.5   | 258.5  | 6.982173 | 2.417986 | -1.52987 | Down | 2.58E-58 | 2.13E-57 |
| THYN1     | 790  | 631.5   | 215    | 23.20649 | 8.046295 | -1.52813 | Down | 2.49E-48 | 1.80E-47 |
| SAMD9L    | 7133 | 7938.5  | 2693.5 | 32.22801 | 11.1767  | -1.52782 | Down | 0        | 0        |
| CEP78     | 2719 | 679     | 231    | 7.250657 | 2.514613 | -1.52778 | Down | 5.56E-52 | 4.21E-51 |
| EXOC6     | 3637 | 640.5   | 216.5  | 5.097205 | 1.76834  | -1.52731 | Down | 1.31E-49 | 9.68E-49 |
| C1QTNF6   | 1670 | 1058.5  | 360    | 18.41907 | 6.393895 | -1.52643 | Down | 5.43E-80 | 5.65E-79 |
| ARL6IP1   | 2280 | 7933.5  | 2692   | 100.8384 | 35.04124 | -1.52492 | Down | 0        | 0        |
| SKP2      | 1600 | 1189    | 407    | 21.56977 | 7.508923 | -1.52233 | Down | 5.88E-89 | 6.62E-88 |
| PPP2R5D   | 2871 | 2604.5  | 890    | 26.33955 | 9.176175 | -1.52127 | Down | #####    | #####    |
| AIM1      | 7553 | 1727.5  | 591.5  | 6.641927 | 2.316601 | -1.51959 | Down | #####    | #####    |
| HNMT      | 3373 | 409.5   | 140    | 3.520255 | 1.229337 | -1.5178  | Down | 1.01E-31 | 5.57E-31 |
| HOXB13    | 3047 | 72      | 25     | 0.692947 | 0.242005 | -1.51771 | Down | 1.28E-06 | 3.14E-06 |
| ACAT2     | 1567 | 1437    | 492    | 26.60208 | 9.304005 | -1.51562 | Down | #####    | #####    |
| HNRNPA3   | 5808 | 13288.5 | 4548   | 66.32844 | 23.21584 | -1.51452 | Down | 0        | 0        |
| HNRNPR    | 2751 | 8145    | 2795   | 85.94366 | 30.11508 | -1.5129  | Down | 0        | 0        |
| TSEN54    | 1970 | 497.5   | 172    | 7.36025  | 2.582657 | -1.5109  | Down | 1.20E-37 | 7.37E-37 |
| NUP37     | 1228 | 863.5   | 295.5  | 20.31762 | 7.12949  | -1.51086 | Down | 3.51E-65 | 3.14E-64 |
| ABHD2     | 9159 | 4261.5  | 1464   | 13.49751 | 4.738    | -1.51034 | Down | 0        | 0        |
| FERMT3    | 2558 | 1180    | 407.5  | 13.39968 | 4.711634 | -1.5079  | Down | 2.12E-87 | 2.36E-86 |
| C17orf59  | 1932 | 363.5   | 125    | 5.453723 | 1.918729 | -1.50709 | Down | 4.09E-28 | 2.09E-27 |
| GCA       | 3241 | 305     | 105    | 2.728971 | 0.960438 | -1.50659 | Down | 7.00E-24 | 3.28E-23 |
| TEAD2     | 2220 | 1096.5  | 378.5  | 14.37406 | 5.059874 | -1.50629 | Down | 2.57E-81 | 2.72E-80 |

|          |      |        |        |          |          |          |      |          |          |
|----------|------|--------|--------|----------|----------|----------|------|----------|----------|
| WBSCR17  | 3298 | 38     | 14     | 0.348171 | 0.122778 | -1.50375 | Down | 0.000802 | 0.001666 |
| UNC5C    | 9879 | 547.5  | 190    | 1.609633 | 0.568004 | -1.50276 | Down | 4.58E-41 | 2.97E-40 |
| STOML2   | 1303 | 3030   | 1051   | 67.51087 | 23.85    | -1.50113 | Down | #####    | #####    |
| FHOD1    | 3865 | 6701.5 | 2323.5 | 50.36492 | 17.79485 | -1.50096 | Down | 0        | 0        |
| PHOSPHO1 | 2173 | 40     | 14     | 0.534059 | 0.188977 | -1.49879 | Down | 0.000355 | 0.000757 |
| ZNF804A  | 4700 | 751.5  | 262    | 4.654113 | 1.64824  | -1.49758 | Down | 2.04E-55 | 1.62E-54 |
| ANKRD35  | 3363 | 724.5  | 251    | 6.247818 | 2.213383 | -1.4971  | Down | 6.09E-54 | 4.73E-53 |
| UBR7     | 3709 | 1217   | 421    | 9.500468 | 3.3675   | -1.49632 | Down | 1.01E-89 | 1.14E-88 |
| CASP6    | 1394 | 521    | 181    | 10.82119 | 3.83603  | -1.49617 | Down | 3.49E-39 | 2.19E-38 |
| PRIM1    | 1471 | 450.5  | 156    | 8.867365 | 3.146112 | -1.49494 | Down | 3.65E-34 | 2.10E-33 |
| NUP35    | 1649 | 513    | 178    | 9.026259 | 3.203666 | -1.4944  | Down | 1.14E-38 | 7.07E-38 |
| WDR62    | 4731 | 1102   | 383.5  | 6.767722 | 2.402167 | -1.49433 | Down | 6.65E-81 | 6.99E-80 |
| FOXA2    | 2428 | 1139.5 | 396    | 13.58379 | 4.825144 | -1.49324 | Down | 1.62E-83 | 1.73E-82 |
| MIS18A   | 1587 | 845    | 294.5  | 15.45458 | 5.496227 | -1.49152 | Down | 2.32E-62 | 2.00E-61 |
| HSPE1    | 965  | 5121   | 1775.5 | 153.6802 | 54.66527 | -1.49123 | Down | 0        | 0        |
| PLEKHA6  | 7434 | 2795   | 978.5  | 10.92672 | 3.888339 | -1.49064 | Down | #####    | #####    |
| C16orf54 | 2686 | 472.5  | 165.5  | 5.115288 | 1.821015 | -1.49007 | Down | 2.33E-35 | 1.38E-34 |
| PLSCR1   | 2228 | 938.5  | 328    | 12.22951 | 4.355617 | -1.48942 | Down | 1.47E-68 | 1.37E-67 |
| CABLES1  | 4307 | 791    | 276    | 5.329274 | 1.898302 | -1.48923 | Down | 2.91E-58 | 2.40E-57 |
| SHCBP1   | 3249 | 4534.5 | 1581   | 40.47264 | 14.42979 | -1.4879  | Down | 0        | 0        |
| NOC4L    | 1682 | 913    | 319.5  | 15.73784 | 5.616963 | -1.48638 | Down | 7.48E-67 | 6.84E-66 |
| CACNA2D4 | 5343 | 410    | 143.5  | 2.224497 | 0.793947 | -1.48636 | Down | 5.07E-31 | 2.74E-30 |
| HIST1H3B | 472  | 24.5   | 8.5    | 1.505291 | 0.537539 | -1.4856  | Down | 0.004551 | 0.008849 |
| HSPA1B   | 2551 | 1981.5 | 692    | 22.52976 | 8.047271 | -1.48526 | Down | #####    | #####    |
| AASDHPPT | 2880 | 1532   | 535.5  | 15.39956 | 5.505105 | -1.48405 | Down | #####    | #####    |

|         |      |        |        |          |          |          |      |          |          |
|---------|------|--------|--------|----------|----------|----------|------|----------|----------|
| TCF12   | 4796 | 4053   | 1418.5 | 24.49313 | 8.757725 | -1.48375 | Down | #####    | #####    |
| NUF2    | 1843 | 1239   | 433.5  | 19.469   | 6.963096 | -1.48338 | Down | 4.76E-90 | 5.42E-89 |
| PTGR1   | 1249 | 5212.5 | 1827.5 | 121.1345 | 43.32492 | -1.48334 | Down | 0        | 0        |
| SYNM    | 6419 | 1008.5 | 355    | 4.573249 | 1.63659  | -1.48253 | Down | 8.02E-73 | 7.83E-72 |
| COL24A1 | 6500 | 161    | 58     | 0.727283 | 0.260284 | -1.48243 | Down | 1.45E-12 | 4.84E-12 |
| PRR3    | 3404 | 348.5  | 123    | 2.987145 | 1.069071 | -1.48241 | Down | 4.16E-26 | 2.04E-25 |
| GALM    | 2483 | 349.5  | 122.5  | 4.08051  | 1.460654 | -1.48213 | Down | 1.45E-26 | 7.21E-26 |
| HCFC1   | 8436 | 8094   | 2850   | 27.8832  | 10.00153 | -1.47917 | Down | 0        | 0        |
| ZDHHC14 | 2774 | 173.5  | 61     | 1.821297 | 0.653558 | -1.47858 | Down | 9.03E-14 | 3.27E-13 |
| GRWD1   | 2456 | 1687   | 596.5  | 19.99647 | 7.177649 | -1.47816 | Down | #####    | #####    |
| GTF2H4  | 1736 | 433    | 153    | 7.256741 | 2.605157 | -1.47795 | Down | 4.17E-32 | 2.31E-31 |
| CENPM   | 558  | 418.5  | 147.5  | 21.85505 | 7.846787 | -1.47779 | Down | 3.00E-31 | 1.63E-30 |
| MNS1    | 2023 | 318    | 112    | 4.56223  | 1.639481 | -1.4765  | Down | 4.19E-24 | 1.97E-23 |
| C5orf35 | 1398 | 253.5  | 88.5   | 5.242166 | 1.884205 | -1.47621 | Down | 8.29E-20 | 3.53E-19 |
| MED30   | 987  | 355    | 125    | 10.42095 | 3.747107 | -1.47564 | Down | 9.79E-27 | 4.88E-26 |
| PRDM8   | 3150 | 224    | 79     | 2.059197 | 0.741729 | -1.47312 | Down | 2.14E-17 | 8.61E-17 |
| USP46   | 8057 | 3521   | 1238.5 | 12.64417 | 4.554513 | -1.4731  | Down | #####    | #####    |
| PITX1   | 2383 | 1612.5 | 573.5  | 19.72887 | 7.107558 | -1.47288 | Down | #####    | #####    |
| DHX30   | 4133 | 4703   | 1664   | 33.06879 | 11.91596 | -1.47258 | Down | 0        | 0        |
| TMEM140 | 2072 | 1724   | 612    | 24.22039 | 8.734942 | -1.47135 | Down | #####    | #####    |
| PHF14   | 8370 | 2509.5 | 887.5  | 8.715493 | 3.143591 | -1.47117 | Down | #####    | #####    |
| TAF6L   | 2176 | 611    | 216    | 8.165257 | 2.947668 | -1.46992 | Down | 1.35E-44 | 9.26E-44 |
| BCL2L12 | 1893 | 821    | 290.5  | 12.56963 | 4.539472 | -1.46935 | Down | 2.13E-59 | 1.78E-58 |
| NCAPD3  | 5661 | 4956.5 | 1755.5 | 25.4053  | 9.179389 | -1.46866 | Down | 0        | 0        |
| TOX2    | 2433 | 2769.5 | 984    | 33.11786 | 11.98087 | -1.46688 | Down | #####    | #####    |

|           |       |        |        |          |          |          |      |          |          |
|-----------|-------|--------|--------|----------|----------|----------|------|----------|----------|
| MAPK10    | 4186  | 90.5   | 32     | 0.623142 | 0.225548 | -1.46613 | Down | 9.74E-08 | 2.52E-07 |
| SP140     | 854   | 235.5  | 83.5   | 7.976781 | 2.887452 | -1.46601 | Down | 3.82E-18 | 1.57E-17 |
| PSRC1     | 1759  | 1648.5 | 585.5  | 27.19081 | 9.843754 | -1.46584 | Down | #####    | #####    |
| CCDC28B   | 895   | 545.5  | 194.5  | 17.73933 | 6.423041 | -1.46562 | Down | 1.39E-39 | 8.75E-39 |
| C14orf169 | 2463  | 365.5  | 130    | 4.31134  | 1.561459 | -1.46524 | Down | 5.02E-27 | 2.51E-26 |
| HIBCH     | 1924  | 680.5  | 242    | 10.28153 | 3.724224 | -1.46504 | Down | 5.49E-49 | 4.00E-48 |
| SPR       | 1466  | 1559.5 | 554.5  | 30.89017 | 11.20542 | -1.46295 | Down | #####    | #####    |
| SELRC1    | 2114  | 451.5  | 161.5  | 6.236645 | 2.263077 | -1.46248 | Down | 6.52E-33 | 3.67E-32 |
| RAD54L    | 2567  | 820.5  | 292.5  | 9.271018 | 3.365925 | -1.46172 | Down | 1.15E-58 | 9.55E-58 |
| KCNN3     | 13080 | 809.5  | 289    | 1.797394 | 0.652782 | -1.46123 | Down | 1.20E-57 | 9.83E-57 |
| NDST3     | 5961  | 92.5   | 33     | 0.449653 | 0.163359 | -1.46077 | Down | 8.46E-08 | 2.19E-07 |
| ZNF367    | 3714  | 450    | 159    | 3.497824 | 1.270789 | -1.46073 | Down | 2.64E-33 | 1.50E-32 |
| NUP107    | 3158  | 1486   | 528    | 13.64738 | 4.959731 | -1.46029 | Down | #####    | #####    |
| HIST2H3A  | 507   | 31     | 11     | 1.772938 | 0.64446  | -1.45998 | Down | 0.001914 | 0.003852 |
| DDX39A    | 1558  | 3637.5 | 1297.5 | 67.85568 | 24.66767 | -1.45985 | Down | #####    | #####    |
| SLC25A28  | 1584  | 552    | 197    | 10.14065 | 3.686578 | -1.4598  | Down | 6.27E-40 | 3.99E-39 |
| LANCL1    | 4526  | 2837   | 1007.5 | 18.15744 | 6.60232  | -1.45952 | Down | #####    | #####    |
| SOCS2     | 2210  | 572.5  | 203.5  | 7.505954 | 2.730308 | -1.45897 | Down | 1.23E-41 | 8.10E-41 |
| LYN       | 3043  | 1086   | 387    | 10.3581  | 3.767953 | -1.45891 | Down | 4.85E-77 | 4.91E-76 |
| SCLY      | 2544  | 523    | 186    | 5.961408 | 2.168668 | -1.45884 | Down | 4.22E-38 | 2.60E-37 |
| CLSPN     | 8484  | 2029.5 | 722    | 6.943534 | 2.528199 | -1.45756 | Down | #####    | #####    |
| CMTM8     | 1185  | 27     | 9.5    | 0.659453 | 0.240328 | -1.45627 | Down | 0.002563 | 0.005099 |
| SLC4A4    | 7693  | 581    | 209    | 2.193532 | 0.800001 | -1.45518 | Down | 1.77E-41 | 1.16E-40 |
| CC2D2A    | 1682  | 451    | 162    | 7.785803 | 2.84015  | -1.45488 | Down | 1.24E-32 | 6.95E-32 |
| RAD9A     | 2128  | 442    | 159    | 6.054783 | 2.211182 | -1.45326 | Down | 5.98E-32 | 3.30E-31 |

|              |      |         |       |          |          |          |      |          |          |
|--------------|------|---------|-------|----------|----------|----------|------|----------|----------|
| HSD17B10     | 936  | 2014    | 721.5 | 62.43896 | 22.81552 | -1.45243 | Down | #####    | #####    |
| CCBL2        | 2065 | 439.5   | 158   | 6.196254 | 2.264289 | -1.45234 | Down | 1.01E-31 | 5.56E-31 |
| ORC2         | 3140 | 859.5   | 308   | 7.94721  | 2.904956 | -1.45193 | Down | 8.78E-61 | 7.44E-60 |
| MND1         | 941  | 255     | 91    | 7.842309 | 2.866989 | -1.45174 | Down | 2.70E-19 | 1.13E-18 |
| NEK3         | 2345 | 164.5   | 59    | 2.033133 | 0.74357  | -1.45116 | Down | 8.51E-13 | 2.90E-12 |
| DNA2         | 4287 | 519.5   | 185   | 3.496098 | 1.279187 | -1.45052 | Down | 1.05E-37 | 6.47E-37 |
| EFHD1        | 2000 | 72      | 26    | 1.047673 | 0.383514 | -1.44984 | Down | 2.48E-06 | 6.02E-06 |
| ALDH16A1     | 2966 | 1159.5  | 418.5 | 11.3619  | 4.16305  | -1.44849 | Down | 1.04E-80 | 1.09E-79 |
| TMEM97       | 2585 | 1559.5  | 559   | 17.48197 | 6.405697 | -1.44844 | Down | #####    | #####    |
| ADAMTS17     | 6331 | 49      | 18.5  | 0.230613 | 0.084517 | -1.44817 | Down | 0.000131 | 0.000288 |
| QRSL1        | 4118 | 526.5   | 190   | 3.717412 | 1.363325 | -1.44717 | Down | 1.71E-37 | 1.05E-36 |
| LOC100509263 | 3032 | 87.5    | 31    | 0.830416 | 0.304923 | -1.44539 | Down | 1.67E-07 | 4.27E-07 |
| CHD4         | 6511 | 13040.5 | 4685  | 58.00552 | 21.30645 | -1.4449  | Down | 0        | 0        |
| FAM184A      | 3519 | 79.5    | 29    | 0.658862 | 0.242014 | -1.44488 | Down | 1.08E-06 | 2.67E-06 |
| ENPP2        | 3120 | 1583    | 571.5 | 14.73908 | 5.416738 | -1.44415 | Down | #####    | #####    |
| NAPEPLD      | 5363 | 1908.5  | 687   | 10.32395 | 3.796315 | -1.44332 | Down | #####    | #####    |
| DHX58        | 2631 | 193.5   | 70    | 2.131675 | 0.78421  | -1.44268 | Down | 1.20E-14 | 4.46E-14 |
| FRK          | 2864 | 122.5   | 45    | 1.254016 | 0.461443 | -1.44233 | Down | 1.45E-09 | 4.02E-09 |
| DHRS11       | 1608 | 205.5   | 74    | 3.688362 | 1.357738 | -1.44178 | Down | 1.44E-15 | 5.54E-15 |
| LMO4         | 5415 | 1470    | 529   | 7.860046 | 2.893865 | -1.44154 | Down | #####    | #####    |
| TBPL1        | 1340 | 543     | 196   | 11.74909 | 4.327734 | -1.44087 | Down | 1.09E-38 | 6.77E-38 |
| PAQR8        | 4758 | 299.5   | 109   | 1.83457  | 0.676429 | -1.43943 | Down | 1.00E-21 | 4.45E-21 |
| NCAPD2       | 4806 | 6628.5  | 2395  | 39.93195 | 14.75869 | -1.43598 | Down | 0        | 0        |
| CBX2         | 4265 | 1380    | 501   | 9.392868 | 3.473032 | -1.43537 | Down | 7.65E-95 | 9.02E-94 |
| FAM55C       | 8610 | 3516.5  | 1273  | 11.84133 | 4.378546 | -1.43531 | Down | #####    | #####    |

|         |       |        |       |          |          |          |      |          |          |
|---------|-------|--------|-------|----------|----------|----------|------|----------|----------|
| GALT    | 1347  | 210    | 76.5  | 4.540613 | 1.679281 | -1.43504 | Down | 7.40E-16 | 2.87E-15 |
| BCL3    | 1864  | 2117.5 | 770   | 33.01963 | 12.21235 | -1.43498 | Down | #####    | #####    |
| GLCC1   | 4762  | 642.5  | 233   | 3.910284 | 1.446585 | -1.43462 | Down | 4.34E-45 | 3.00E-44 |
| FAM120C | 1176  | 713.5  | 257.5 | 17.56468 | 6.498591 | -1.43448 | Down | 2.25E-50 | 1.67E-49 |
| SMC3    | 4131  | 4141.5 | 1498  | 29.03196 | 10.7555  | -1.43257 | Down | #####    | #####    |
| KIF21B  | 9895  | 486.5  | 178   | 1.42898  | 0.529406 | -1.43254 | Down | 4.27E-34 | 2.46E-33 |
| HERC6   | 3781  | 722    | 262.5 | 5.548353 | 2.057414 | -1.43123 | Down | 1.67E-50 | 1.24E-49 |
| IGFLR1  | 1217  | 84.5   | 31    | 2.031157 | 0.753206 | -1.43118 | Down | 5.44E-07 | 1.36E-06 |
| AGPAT9  | 2534  | 1317   | 477.5 | 15.07607 | 5.591672 | -1.43091 | Down | 6.60E-91 | 7.55E-90 |
| ZFPM2   | 4507  | 187    | 69    | 1.216079 | 0.451054 | -1.43086 | Down | 6.46E-14 | 2.35E-13 |
| MAPRE2  | 3209  | 5456.5 | 1981  | 49.3216  | 18.30143 | -1.43026 | Down | 0        | 0        |
| E2F1    | 2722  | 1880.5 | 685   | 20.07032 | 7.450521 | -1.42965 | Down | #####    | #####    |
| FAM86C1 | 2106  | 236    | 86    | 3.246727 | 1.205899 | -1.42888 | Down | 1.78E-17 | 7.21E-17 |
| CSRNP3  | 11687 | 322.5  | 119   | 0.802429 | 0.298175 | -1.42821 | Down | 7.73E-23 | 3.53E-22 |
| LSM10   | 869   | 1497   | 545.5 | 49.95811 | 18.59242 | -1.426   | Down | #####    | #####    |
| FLOT1   | 1839  | 3701   | 1351  | 58.42651 | 21.7457  | -1.42589 | Down | #####    | #####    |
| FANCF   | 3309  | 483    | 177   | 4.248095 | 1.583658 | -1.42356 | Down | 7.20E-34 | 4.13E-33 |
| CDK1    | 1742  | 3449.5 | 1256  | 57.35412 | 21.38624 | -1.42321 | Down | #####    | #####    |
| IFIT3   | 2552  | 1555   | 567   | 17.6579  | 6.584525 | -1.42316 | Down | #####    | #####    |
| TIGD4   | 2472  | 27     | 10    | 0.319835 | 0.119319 | -1.42251 | Down | 0.005098 | 0.009878 |
| UBQLN4  | 3545  | 1945   | 711   | 15.92859 | 5.946076 | -1.42161 | Down | #####    | #####    |
| SARS2   | 2077  | 601    | 220   | 8.411176 | 3.140079 | -1.42151 | Down | 8.36E-42 | 5.50E-41 |
| CABLES2 | 3785  | 1118   | 410   | 8.588761 | 3.209209 | -1.42023 | Down | 4.60E-76 | 4.62E-75 |
| RCCD1   | 2690  | 647.5  | 237   | 6.98052  | 2.60996  | -1.41931 | Down | 7.87E-45 | 5.41E-44 |
| GTSE1   | 3128  | 1445.5 | 530   | 13.41233 | 5.015266 | -1.41916 | Down | 9.45E-98 | 1.14E-96 |

|              |      |         |        |          |          |          |      |          |          |
|--------------|------|---------|--------|----------|----------|----------|------|----------|----------|
| SAMD11       | 2575 | 2393    | 880.5  | 27.03598 | 10.11289 | -1.41869 | Down | #####    | #####    |
| SRXN1        | 2580 | 6170    | 2261.5 | 69.37104 | 25.94971 | -1.41862 | Down | 0        | 0        |
| IPCEF1       | 6815 | 36      | 13.5   | 0.156593 | 0.05866  | -1.41658 | Down | 0.000936 | 0.001934 |
| EXOSC8       | 1427 | 1385.5  | 507    | 28.10854 | 10.53086 | -1.41639 | Down | 4.87E-94 | 5.72E-93 |
| KLHDC8B      | 1999 | 369     | 135.5  | 5.366126 | 2.010637 | -1.41623 | Down | 2.58E-26 | 1.27E-25 |
| LMNB2        | 4653 | 11834   | 4358   | 73.96732 | 27.72545 | -1.41568 | Down | 0        | 0        |
| DNAJA1       | 1538 | 12041.5 | 4411.5 | 226.9726 | 85.08516 | -1.41554 | Down | 0        | 0        |
| CDC45        | 1938 | 685     | 251    | 10.23361 | 3.839024 | -1.4145  | Down | 2.43E-47 | 1.73E-46 |
| NR2C2AP      | 1316 | 340     | 126    | 7.498318 | 2.822518 | -1.40958 | Down | 6.19E-24 | 2.90E-23 |
| NMI          | 1501 | 898.5   | 331    | 17.35288 | 6.532577 | -1.40945 | Down | 5.39E-61 | 4.58E-60 |
| ETFDH        | 2349 | 1029.5  | 378.5  | 12.68909 | 4.779563 | -1.40864 | Down | 5.58E-70 | 5.27E-69 |
| C14orf126    | 2696 | 499.5   | 185.5  | 5.395959 | 2.032805 | -1.40841 | Down | 2.32E-34 | 1.35E-33 |
| CCT4         | 2349 | 7273.5  | 2681   | 89.76219 | 33.83047 | -1.40778 | Down | 0        | 0        |
| RANGRF       | 854  | 771     | 284.5  | 26.18571 | 9.869171 | -1.40778 | Down | 1.15E-52 | 8.77E-52 |
| LOC100509860 | 1002 | 34      | 12.5   | 0.981832 | 0.370101 | -1.40756 | Down | 0.001089 | 0.002235 |
| FAM109A      | 3256 | 812.5   | 300.5  | 7.268771 | 2.740336 | -1.40736 | Down | 3.92E-55 | 3.09E-54 |
| MRPL4        | 1511 | 2867.5  | 1063   | 55.16218 | 20.81268 | -1.40622 | Down | #####    | #####    |
| ORC1         | 3177 | 516.5   | 192.5  | 4.727698 | 1.784483 | -1.40563 | Down | 2.74E-35 | 1.62E-34 |
| CDC6         | 3053 | 1422    | 524.5  | 13.48442 | 5.092227 | -1.40492 | Down | 1.44E-95 | 1.71E-94 |
| C9orf64      | 2485 | 151.5   | 56     | 1.75774  | 0.663882 | -1.40472 | Down | 1.97E-11 | 5.99E-11 |
| EPHA7        | 6644 | 82.5    | 31     | 0.360021 | 0.136028 | -1.40418 | Down | 1.18E-06 | 2.90E-06 |
| ZNF77        | 2057 | 111     | 41     | 1.568128 | 0.592497 | -1.40416 | Down | 8.27E-09 | 2.23E-08 |
| NAPRT1       | 1715 | 207     | 77     | 3.507421 | 1.325291 | -1.4041  | Down | 4.40E-15 | 1.67E-14 |
| GATSL1       | 990  | 51      | 19     | 1.506826 | 0.569546 | -1.40363 | Down | 0.000112 | 0.000248 |
| SCIN         | 2586 | 49      | 18.5   | 0.555707 | 0.210233 | -1.40233 | Down | 0.000131 | 0.000287 |



|          |      |        |        |          |          |          |      |          |          |
|----------|------|--------|--------|----------|----------|----------|------|----------|----------|
| RRP9     | 1588 | 1364.5 | 507    | 24.96175 | 9.447407 | -1.40173 | Down | 1.42E-90 | 1.62E-89 |
| PARP2    | 1904 | 769    | 287    | 11.74285 | 4.446922 | -1.4009  | Down | 1.56E-51 | 1.17E-50 |
| KCNAB2   | 4172 | 1614.5 | 600.5  | 11.25507 | 4.26238  | -1.40084 | Down | #####    | #####    |
| BEND3    | 6660 | 371.5  | 139.5  | 1.6275   | 0.61635  | -1.40083 | Down | 1.43E-25 | 6.95E-25 |
| ASRGL1   | 2347 | 69.5   | 26     | 0.868411 | 0.328947 | -1.40052 | Down | 8.05E-06 | 1.90E-05 |
| TTC5     | 1881 | 356    | 132.5  | 5.520758 | 2.091402 | -1.4004  | Down | 5.73E-25 | 2.75E-24 |
| TTK      | 3019 | 909    | 336    | 8.717094 | 3.303384 | -1.3999  | Down | 1.82E-61 | 1.56E-60 |
| ZNF454   | 2172 | 43     | 17     | 0.598231 | 0.227036 | -1.39778 | Down | 0.00073  | 0.001519 |
| HMG2     | 1989 | 16176  | 6000.5 | 235.7066 | 89.46584 | -1.39758 | Down | 0        | 0        |
| TIPIN    | 1295 | 400    | 147.5  | 8.941097 | 3.394905 | -1.39708 | Down | 3.26E-28 | 1.67E-27 |
| MAMSTR   | 1579 | 40     | 15     | 0.739326 | 0.281105 | -1.3951  | Down | 0.000686 | 0.00143  |
| ATP5G1   | 663  | 2875   | 1068   | 125.6412 | 47.77725 | -1.39491 | Down | #####    | #####    |
| ASF1B    | 1746 | 1462.5 | 546    | 24.30761 | 9.244271 | -1.39478 | Down | 2.90E-96 | 3.45E-95 |
| H1FX     | 1524 | 2542.5 | 948.5  | 48.48326 | 18.44146 | -1.39453 | Down | #####    | #####    |
| WNT3     | 1506 | 69     | 26     | 1.337233 | 0.508839 | -1.39397 | Down | 8.05E-06 | 1.90E-05 |
| QTRT1    | 1352 | 710    | 265.5  | 15.27631 | 5.815291 | -1.39337 | Down | 1.04E-47 | 7.47E-47 |
| TMEM218  | 2104 | 659    | 246    | 9.10242  | 3.466041 | -1.39296 | Down | 2.15E-44 | 1.47E-43 |
| XRCC3    | 2620 | 712.5  | 267    | 7.917572 | 3.015241 | -1.39278 | Down | 1.66E-47 | 1.19E-46 |
| DDX54    | 4404 | 4039   | 1511.5 | 26.65902 | 10.15533 | -1.39239 | Down | #####    | #####    |
| CDT1     | 2742 | 1603.5 | 601.5  | 17.02657 | 6.486173 | -1.39235 | Down | #####    | #####    |
| RNASEH2B | 1691 | 1061.5 | 396.5  | 18.23037 | 6.948947 | -1.39148 | Down | 1.99E-70 | 1.89E-69 |
| AGPHD1   | 1235 | 46.5   | 17.5   | 1.097796 | 0.418533 | -1.3912  | Down | 0.000227 | 0.00049  |
| HAUS8    | 1468 | 400.5  | 150    | 7.921934 | 3.020676 | -1.39098 | Down | 2.07E-27 | 1.05E-26 |
| NUP188   | 5689 | 3748   | 1401.5 | 19.11434 | 7.291945 | -1.39028 | Down | #####    | #####    |
| ALPK1    | 5389 | 567    | 215    | 3.07414  | 1.175163 | -1.38732 | Down | 1.50E-37 | 9.16E-37 |

|          |      |         |        |          |          |          |      |          |          |
|----------|------|---------|--------|----------|----------|----------|------|----------|----------|
| ABCF2    | 2262 | 6870.5  | 2578   | 88.17644 | 33.71813 | -1.38687 | Down | 0        | 0        |
| C10orf81 | 3459 | 283.5   | 107.5  | 2.393706 | 0.915638 | -1.3864  | Down | 1.29E-19 | 5.47E-19 |
| RBMXL1   | 5128 | 823     | 309    | 4.665734 | 1.787207 | -1.3844  | Down | 1.53E-54 | 1.19E-53 |
| NOP16    | 537  | 900     | 338    | 48.68887 | 18.65394 | -1.38411 | Down | 1.85E-59 | 1.55E-58 |
| PARP1    | 4001 | 9362    | 3509   | 67.82695 | 25.99494 | -1.38363 | Down | 0        | 0        |
| ESRRA    | 2221 | 1450.5  | 546.5  | 19.00101 | 7.284367 | -1.3832  | Down | 2.62E-94 | 3.08E-93 |
| TRIM34   | 2330 | 278     | 104.5  | 3.454667 | 1.324528 | -1.38307 | Down | 1.37E-19 | 5.80E-19 |
| SUMO3    | 1831 | 5932    | 2231   | 94.04745 | 36.06079 | -1.38296 | Down | 0        | 0        |
| SEMA6C   | 3904 | 50      | 19     | 0.371725 | 0.142596 | -1.3823  | Down | 0.000166 | 0.000362 |
| PIK3CG   | 5379 | 263     | 99     | 1.416872 | 0.543768 | -1.38165 | Down | 1.88E-18 | 7.78E-18 |
| RCC1     | 2633 | 2505    | 941.5  | 27.58721 | 10.592   | -1.38103 | Down | #####    | #####    |
| TXNRD1   | 3859 | 41326.5 | 15534  | 310.5309 | 119.3253 | -1.37984 | Down | 0        | 0        |
| APEH     | 2775 | 3501    | 1320.5 | 36.66519 | 14.09356 | -1.37938 | Down | #####    | #####    |
| SRSF2    | 2008 | 6928    | 2608.5 | 99.98238 | 38.43792 | -1.37914 | Down | 0        | 0        |
| FGD6     | 9288 | 892.5   | 336.5  | 2.78605  | 1.071138 | -1.37908 | Down | 1.11E-58 | 9.22E-58 |
| CHAF1B   | 2297 | 1436.5  | 541    | 18.13221 | 6.97254  | -1.3788  | Down | 2.41E-93 | 2.81E-92 |
| RBPMS2   | 2019 | 94.5    | 36     | 1.364901 | 0.524931 | -1.3786  | Down | 2.56E-07 | 6.50E-07 |
| MX1      | 2683 | 315.5   | 120    | 3.420349 | 1.315484 | -1.37855 | Down | 2.00E-21 | 8.81E-21 |
| TRMT11   | 1967 | 598.5   | 226.5  | 8.853064 | 3.409074 | -1.3768  | Down | 1.04E-39 | 6.57E-39 |
| TRIM14   | 1789 | 1700    | 642    | 27.60279 | 10.62933 | -1.37676 | Down | #####    | #####    |
| RPAIN    | 1679 | 978.5   | 369    | 16.86415 | 6.495474 | -1.37645 | Down | 5.21E-64 | 4.59E-63 |
| FMO3     | 2090 | 1034.5  | 390.5  | 14.38107 | 5.53964  | -1.37631 | Down | 1.32E-67 | 1.22E-66 |
| OSGEPL1  | 2339 | 291     | 110    | 3.60834  | 1.390502 | -1.37573 | Down | 3.91E-20 | 1.68E-19 |
| NUP160   | 5383 | 2529    | 955    | 13.62959 | 5.257015 | -1.37443 | Down | #####    | #####    |
| CIT      | 8708 | 1846.5  | 697.5  | 6.143862 | 2.372338 | -1.37284 | Down | #####    | #####    |

|         |       |        |        |          |          |          |      |          |          |
|---------|-------|--------|--------|----------|----------|----------|------|----------|----------|
| KCND1   | 4720  | 44.5   | 17     | 0.273708 | 0.105688 | -1.37282 | Down | 0.000497 | 0.001049 |
| MKI67   | 12507 | 12479  | 4723.5 | 28.90782 | 11.16616 | -1.37233 | Down | 0        | 0        |
| WDR17   | 7529  | 179.5  | 68     | 0.691923 | 0.267309 | -1.3721  | Down | 7.33E-13 | 2.51E-12 |
| HRSP12  | 1011  | 294    | 112    | 8.451365 | 3.265009 | -1.3721  | Down | 4.24E-20 | 1.82E-19 |
| CYB5B   | 4286  | 6900.5 | 2611   | 46.70322 | 18.04916 | -1.37159 | Down | 0        | 0        |
| LSR     | 2228  | 72.5   | 28     | 0.958057 | 0.370552 | -1.37044 | Down | 8.64E-06 | 2.04E-05 |
| ZNF385D | 1812  | 771    | 292    | 12.35469 | 4.780164 | -1.36993 | Down | 1.52E-50 | 1.13E-49 |
| AKR1B10 | 1610  | 1145.5 | 433.5  | 20.64929 | 7.989915 | -1.36984 | Down | 2.25E-74 | 2.23E-73 |
| METTL16 | 5758  | 1485   | 564    | 7.477921 | 2.894802 | -1.36917 | Down | 2.79E-95 | 3.31E-94 |
| PDK2    | 2674  | 608    | 231    | 6.609817 | 2.558805 | -1.36914 | Down | 5.00E-40 | 3.18E-39 |
| PSMA3   | 993   | 3106.5 | 1174.5 | 90.58423 | 35.06793 | -1.36911 | Down | #####    | #####    |
| OLFML2B | 3240  | 346.5  | 132    | 3.112256 | 1.205072 | -1.36884 | Down | 2.48E-23 | 1.15E-22 |
| TOX     | 4131  | 120.5  | 46     | 0.851439 | 0.32969  | -1.36879 | Down | 5.74E-09 | 1.56E-08 |
| CEND1   | 1646  | 340.5  | 129    | 6.001401 | 2.324578 | -1.36833 | Down | 3.86E-23 | 1.78E-22 |
| FOXG1   | 2600  | 4470   | 1697   | 49.89577 | 19.32953 | -1.36811 | Down | #####    | #####    |
| CNTLN   | 5522  | 730.5  | 277    | 3.834129 | 1.48534  | -1.36811 | Down | 8.23E-48 | 5.90E-47 |
| CUTC    | 1378  | 674    | 255.5  | 14.17201 | 5.496717 | -1.3664  | Down | 1.80E-44 | 1.23E-43 |
| ALKBH4  | 2138  | 470    | 180    | 6.407176 | 2.485263 | -1.36629 | Down | 6.03E-31 | 3.26E-30 |
| MTHFD2L | 2372  | 433    | 165    | 5.296976 | 2.055377 | -1.36577 | Down | 7.50E-29 | 3.90E-28 |
| MRPL9   | 1314  | 1958.5 | 745    | 43.22957 | 16.77487 | -1.36572 | Down | #####    | #####    |
| ANP32B  | 1617  | 5277   | 2000   | 94.53762 | 36.69251 | -1.3654  | Down | 0        | 0        |
| EML3    | 3265  | 1977   | 753.5  | 17.59427 | 6.83095  | -1.36495 | Down | #####    | #####    |
| SLC35G1 | 2428  | 260.5  | 99     | 3.1135   | 1.209971 | -1.36356 | Down | 5.82E-18 | 2.37E-17 |
| MELK    | 2501  | 1817.5 | 688.5  | 21.03998 | 8.176834 | -1.36352 | Down | #####    | #####    |
| NOP2    | 2661  | 2510.5 | 956    | 27.36284 | 10.63815 | -1.36297 | Down | #####    | #####    |

|              |      |        |        |          |          |          |      |          |          |
|--------------|------|--------|--------|----------|----------|----------|------|----------|----------|
| CPS1         | 5738 | 906.5  | 345    | 4.580259 | 1.782166 | -1.3618  | Down | 1.33E-58 | 1.10E-57 |
| ZNF784       | 2006 | 116    | 44     | 1.673018 | 0.651528 | -1.36055 | Down | 7.77E-09 | 2.10E-08 |
| TMCO4        | 2989 | 1033.5 | 395.5  | 10.04058 | 3.910613 | -1.36038 | Down | 3.81E-66 | 3.44E-65 |
| ITPKB        | 6162 | 1048.5 | 400.5  | 4.943941 | 1.925616 | -1.36034 | Down | 2.86E-67 | 2.63E-66 |
| SFXN4        | 1400 | 460    | 176    | 9.53195  | 3.712715 | -1.3603  | Down | 2.29E-30 | 1.23E-29 |
| CALCRL       | 5006 | 70     | 27     | 0.408328 | 0.159142 | -1.35941 | Down | 1.01E-05 | 2.37E-05 |
| SLMO2        | 2581 | 3716   | 1415   | 41.72355 | 16.26373 | -1.3592  | Down | #####    | #####    |
| IRF2         | 2302 | 1081.5 | 412.5  | 13.61131 | 5.305887 | -1.35914 | Down | 1.74E-69 | 1.64E-68 |
| UBA7         | 3330 | 2724   | 1042.5 | 23.72133 | 9.250516 | -1.35858 | Down | #####    | #####    |
| C8orf4       | 1833 | 2194.5 | 837.5  | 34.72536 | 13.54215 | -1.35853 | Down | #####    | #####    |
| NPM3         | 904  | 1061   | 405.5  | 34.07061 | 13.30152 | -1.35694 | Down | 4.51E-68 | 4.18E-67 |
| ZNF689       | 2724 | 544    | 208    | 5.788222 | 2.260007 | -1.35679 | Down | 1.20E-35 | 7.11E-35 |
| NRF1         | 3523 | 738    | 281.5  | 6.069112 | 2.369962 | -1.35662 | Down | 4.58E-48 | 3.30E-47 |
| HYLS1        | 2073 | 77     | 30     | 1.089198 | 0.425472 | -1.35613 | Down | 4.31E-06 | 1.03E-05 |
| WDR12        | 2299 | 1325   | 504    | 16.67486 | 6.518736 | -1.35501 | Down | 5.13E-85 | 5.59E-84 |
| LRRC45       | 2639 | 854.5  | 328    | 9.397389 | 3.6751   | -1.35448 | Down | 1.28E-54 | 1.01E-53 |
| CDH15        | 2875 | 391.5  | 151    | 3.971168 | 1.55319  | -1.35433 | Down | 1.08E-25 | 5.27E-25 |
| IL15RA       | 1657 | 1029.5 | 393.5  | 18.05135 | 7.061198 | -1.35412 | Down | 5.12E-66 | 4.62E-65 |
| LOC100287313 | 1228 | 55.5   | 21     | 1.303093 | 0.509765 | -1.35404 | Down | 8.22E-05 | 0.000183 |
| DTX3L        | 5768 | 3312   | 1269.5 | 16.67206 | 6.522357 | -1.35397 | Down | #####    | #####    |
| MESP1        | 1184 | 39     | 15     | 0.964331 | 0.377304 | -1.3538  | Down | 0.001016 | 0.002091 |
| NEK2         | 1938 | 1276   | 488.5  | 19.09096 | 7.475095 | -1.35273 | Down | 2.94E-81 | 3.10E-80 |
| RARG         | 2992 | 2583   | 993.5  | 25.09594 | 9.829272 | -1.3523  | Down | #####    | #####    |
| ARHGAP19     | 5408 | 1122.5 | 430.5  | 6.009165 | 2.355595 | -1.35107 | Down | 1.93E-71 | 1.86E-70 |
| SLC25A5      | 1351 | 12129  | 4657.5 | 260.4788 | 102.1209 | -1.35089 | Down | 0        | 0        |

|          |      |        |        |          |          |          |      |          |          |
|----------|------|--------|--------|----------|----------|----------|------|----------|----------|
| MYPOP    | 1909 | 728.5  | 281.5  | 11.11069 | 4.356819 | -1.3506  | Down | 1.85E-46 | 1.30E-45 |
| GPATCH4  | 2172 | 2894   | 1117   | 38.79841 | 15.21502 | -1.3505  | Down | #####    | #####    |
| SSBP4    | 1751 | 1981   | 766.5  | 32.93646 | 12.92181 | -1.34988 | Down | #####    | #####    |
| NOL11    | 2454 | 1908.5 | 734    | 22.56957 | 8.860371 | -1.34894 | Down | #####    | #####    |
| METAP1D  | 1550 | 223.5  | 86     | 4.169149 | 1.637081 | -1.34863 | Down | 2.46E-15 | 9.38E-15 |
| TOMM22   | 1396 | 1700.5 | 653.5  | 35.28897 | 13.87328 | -1.34691 | Down | #####    | #####    |
| COMMD8   | 1438 | 841.5  | 324    | 16.96242 | 6.670018 | -1.34658 | Down | 1.47E-53 | 1.14E-52 |
| ECHDC1   | 2132 | 1835   | 705    | 24.91933 | 9.802131 | -1.3461  | Down | #####    | #####    |
| H2AFZ    | 951  | 10641  | 4096   | 324.4052 | 127.7004 | -1.34503 | Down | 0        | 0        |
| MPP6     | 2201 | 770    | 297.5  | 10.15742 | 3.998822 | -1.34489 | Down | 4.29E-49 | 3.13E-48 |
| C14orf49 | 3277 | 215    | 85     | 1.931418 | 0.760479 | -1.34468 | Down | 2.62E-14 | 9.67E-14 |
| MGST1    | 987  | 5693.5 | 2190.5 | 167.0428 | 65.77687 | -1.34457 | Down | 0        | 0        |
| NRGN     | 1238 | 997.5  | 386    | 23.47799 | 9.246926 | -1.34426 | Down | 1.10E-62 | 9.53E-62 |
| CHORDC1  | 3343 | 1433.5 | 551.5  | 12.4145  | 4.893504 | -1.34309 | Down | 2.86E-90 | 3.26E-89 |
| CEP70    | 2678 | 594    | 229    | 6.429119 | 2.534719 | -1.3428  | Down | 2.74E-38 | 1.69E-37 |
| E2F8     | 3736 | 379.5  | 146.5  | 2.950006 | 1.163086 | -1.34276 | Down | 4.81E-25 | 2.31E-24 |
| GPD2     | 6046 | 3663   | 1414   | 17.57928 | 6.934196 | -1.34208 | Down | #####    | #####    |
| FAM81A   | 3468 | 125    | 49     | 1.0478   | 0.413611 | -1.34102 | Down | 5.24E-09 | 1.43E-08 |
| NMRAL1   | 1401 | 672    | 261.5  | 13.956   | 5.512975 | -1.33998 | Down | 1.32E-42 | 8.80E-42 |
| RAVER2   | 4376 | 832    | 322.5  | 5.519182 | 2.180943 | -1.3395  | Down | 1.25E-52 | 9.52E-52 |
| TRMT1L   | 4421 | 1199   | 463.5  | 7.851804 | 3.10418  | -1.33881 | Down | 2.51E-75 | 2.51E-74 |
| FAM122B  | 2717 | 3503.5 | 1355.5 | 37.41826 | 14.79571 | -1.33856 | Down | #####    | #####    |
| RRM2     | 3284 | 8954.5 | 3461   | 79.05661 | 31.27473 | -1.33789 | Down | 0        | 0        |
| HOXC13   | 2435 | 290.5  | 112.5  | 3.466002 | 1.371549 | -1.33747 | Down | 1.88E-19 | 7.92E-19 |
| RHBDL3   | 4688 | 253.5  | 98     | 1.563502 | 0.61897  | -1.33684 | Down | 4.34E-17 | 1.74E-16 |

|          |      |         |        |          |          |          |      |          |          |
|----------|------|---------|--------|----------|----------|----------|------|----------|----------|
| DIMT1    | 1557 | 1393.5  | 541    | 25.98176 | 10.29697 | -1.33528 | Down | 1.96E-86 | 2.16E-85 |
| PSMD5    | 3411 | 2107.5  | 816.5  | 17.91855 | 7.102561 | -1.33504 | Down | #####    | #####    |
| ID3      | 1288 | 8553    | 3335   | 193.14   | 76.58856 | -1.33445 | Down | 0        | 0        |
| SPC25    | 1375 | 1136    | 440    | 23.93294 | 9.490629 | -1.33442 | Down | 3.98E-71 | 3.82E-70 |
| C18orf54 | 5023 | 548.5   | 212.5  | 3.160801 | 1.25352  | -1.3343  | Down | 2.89E-35 | 1.71E-34 |
| HMGA1    | 1998 | 12508.5 | 4871   | 181.9466 | 72.16953 | -1.33405 | Down | 0        | 0        |
| SLC4A11  | 3110 | 243     | 94     | 2.26365  | 0.897903 | -1.33402 | Down | 1.67E-16 | 6.58E-16 |
| TIMM8A   | 1459 | 427     | 165.5  | 8.491335 | 3.369636 | -1.3334  | Down | 6.94E-28 | 3.53E-27 |
| OR10H1   | 1120 | 41      | 17     | 1.10618  | 0.439009 | -1.33326 | Down | 0.001547 | 0.00314  |
| XRCC1    | 2102 | 1611    | 625.5  | 22.20441 | 8.812717 | -1.33319 | Down | #####    | 9.42E-99 |
| EZH2     | 2681 | 2355.5  | 912.5  | 25.46135 | 10.10793 | -1.33282 | Down | #####    | #####    |
| RFTN2    | 3131 | 507.5   | 198.5  | 4.713961 | 1.87207  | -1.33231 | Down | 2.81E-32 | 1.56E-31 |
| FGD1     | 4291 | 1631    | 637    | 11.05913 | 4.394033 | -1.33162 | Down | #####    | 6.72E-99 |
| PHB2     | 1457 | 5585    | 2177   | 111.344  | 44.24632 | -1.33139 | Down | 0        | 0        |
| DDX60    | 6099 | 1380.5  | 536.5  | 6.557129 | 2.607703 | -1.33028 | Down | 1.24E-85 | 1.36E-84 |
| PKIB     | 1909 | 736.5   | 284.5  | 11.11951 | 4.426643 | -1.32881 | Down | 5.67E-47 | 4.01E-46 |
| CHAF1A   | 3344 | 1982    | 773    | 17.19909 | 6.847437 | -1.3287  | Down | #####    | #####    |
| DBR1     | 2690 | 663     | 259.5  | 7.18151  | 2.859597 | -1.32848 | Down | 1.11E-41 | 7.31E-41 |
| PGAM5    | 1194 | 1947.5  | 761    | 47.34199 | 18.85556 | -1.32813 | Down | #####    | #####    |
| FECH     | 7295 | 1356.5  | 530    | 5.407697 | 2.154405 | -1.32773 | Down | 2.44E-83 | 2.61E-82 |
| GGCT     | 1217 | 1896    | 736.5  | 45.09878 | 17.96988 | -1.32751 | Down | #####    | #####    |
| ALKBH6   | 980  | 526.5   | 205    | 15.53524 | 6.196279 | -1.32607 | Down | 1.56E-33 | 8.92E-33 |
| SMARCD2  | 2770 | 2628    | 1029.5 | 27.5882  | 11.00662 | -1.32568 | Down | #####    | #####    |
| PKNOX2   | 3730 | 101     | 41     | 0.798536 | 0.318687 | -1.32522 | Down | 3.52E-07 | 8.88E-07 |
| APOL3    | 2145 | 1029.5  | 406    | 13.97559 | 5.580237 | -1.32451 | Down | 9.94E-63 | 8.59E-62 |

|           |      |         |        |          |          |          |      |          |          |
|-----------|------|---------|--------|----------|----------|----------|------|----------|----------|
| PBX1      | 4162 | 2013    | 789.5  | 14.03448 | 5.605985 | -1.32394 | Down | #####    | #####    |
| EIF2B3    | 1994 | 2079.5  | 812    | 30.23003 | 12.07706 | -1.32371 | Down | #####    | #####    |
| MCM4      | 4800 | 7716.5  | 3017.5 | 46.60815 | 18.62948 | -1.32299 | Down | 0        | 0        |
| ZNF792    | 3898 | 264.5   | 104    | 1.966235 | 0.785997 | -1.32284 | Down | 2.51E-17 | 1.01E-16 |
| SEMA3A    | 5672 | 8638.5  | 3379.5 | 44.16432 | 17.65855 | -1.32251 | Down | 0        | 0        |
| ADAMTS3   | 5836 | 410.5   | 161.5  | 2.042316 | 0.816821 | -1.32211 | Down | 3.45E-26 | 1.69E-25 |
| AFP       | 2032 | 165.5   | 65     | 2.366825 | 0.947031 | -1.32147 | Down | 2.27E-11 | 6.87E-11 |
| SCFD2     | 3204 | 1276.5  | 502.5  | 11.57946 | 4.636886 | -1.32034 | Down | 1.03E-77 | 1.05E-76 |
| RSRC1     | 1647 | 1029.5  | 403    | 18.10243 | 7.25004  | -1.32012 | Down | 1.78E-63 | 1.55E-62 |
| HNRNPA1   | 1941 | 24284.5 | 9510.5 | 362.856  | 145.3336 | -1.32003 | Down | 0        | 0        |
| HSP90AB1  | 2567 | 62658.5 | 24550  | 707.5013 | 283.5231 | -1.31927 | Down | 0        | 0        |
| FGB       | 3451 | 53      | 22     | 0.462083 | 0.185212 | -1.31897 | Down | 0.000313 | 0.000669 |
| ABHD11    | 1446 | 790.5   | 311.5  | 15.88693 | 6.369725 | -1.31854 | Down | 9.69E-49 | 7.03E-48 |
| FARSB     | 2233 | 2505    | 981    | 32.50017 | 13.03624 | -1.31792 | Down | #####    | #####    |
| IRF1      | 3567 | 5103.5  | 2015   | 41.6117  | 16.70318 | -1.31687 | Down | #####    | #####    |
| POLD1     | 3470 | 1884.5  | 743.5  | 15.81315 | 6.347754 | -1.31681 | Down | #####    | #####    |
| C14orf102 | 3480 | 340     | 135    | 2.857003 | 1.146897 | -1.31677 | Down | 1.29E-21 | 5.72E-21 |
| NR113     | 1285 | 45      | 18     | 1.017128 | 0.408488 | -1.31613 | Down | 0.000617 | 0.001293 |
| SRSF1     | 5468 | 10677   | 4190.5 | 56.58834 | 22.73817 | -1.31539 | Down | 0        | 0        |
| SOX4      | 4912 | 3719.5  | 1464   | 21.9939  | 8.839366 | -1.31509 | Down | #####    | #####    |
| DLAT      | 4352 | 2071.5  | 815.5  | 13.80659 | 5.549656 | -1.31489 | Down | #####    | #####    |
| MXD3      | 2662 | 1216    | 481.5  | 13.2719  | 5.335341 | -1.31472 | Down | 1.68E-73 | 1.65E-72 |
| NUP85     | 2311 | 1499    | 591    | 18.82618 | 7.569075 | -1.31455 | Down | 1.17E-90 | 1.33E-89 |
| HNRPDL    | 4157 | 5530    | 2174.5 | 38.57418 | 15.51423 | -1.31404 | Down | 0        | 0        |
| CREB3L4   | 1747 | 150     | 59.5   | 2.501917 | 1.006373 | -1.31387 | Down | 1.74E-10 | 5.03E-10 |

|          |      |        |        |          |          |          |      |          |          |
|----------|------|--------|--------|----------|----------|----------|------|----------|----------|
| NCOA7    | 6457 | 2597   | 1022.5 | 11.66516 | 4.692723 | -1.31371 | Down | #####    | #####    |
| SLC12A9  | 3308 | 2288   | 906    | 20.10309 | 8.087414 | -1.31367 | Down | #####    | #####    |
| LPAR1    | 3182 | 1449.5 | 573    | 13.23605 | 5.330677 | -1.31208 | Down | 2.84E-87 | 3.15E-86 |
| RNFT2    | 2914 | 119.5  | 47.5   | 1.196664 | 0.482024 | -1.31184 | Down | 1.50E-08 | 4.02E-08 |
| SMAD1    | 3056 | 408.5  | 162    | 3.888666 | 1.567414 | -1.31089 | Down | 1.26E-25 | 6.13E-25 |
| ST8SIA1  | 9737 | 182    | 72.5   | 0.543839 | 0.219325 | -1.31011 | Down | 2.54E-12 | 8.37E-12 |
| TRIM16L  | 1982 | 3556.5 | 1406   | 52.09313 | 21.01873 | -1.30942 | Down | #####    | #####    |
| TMCO7    | 4834 | 1166.5 | 461.5  | 6.999178 | 2.824338 | -1.30927 | Down | 1.31E-70 | 1.25E-69 |
| RANBP1   | 884  | 2134   | 841.5  | 69.88927 | 28.22874 | -1.30791 | Down | #####    | #####    |
| WDR4     | 1524 | 1110.5 | 441    | 21.19284 | 8.560114 | -1.30788 | Down | 8.93E-67 | 8.14E-66 |
| NOP56    | 1992 | 4987   | 1969.5 | 72.64677 | 29.35261 | -1.30741 | Down | #####    | #####    |
| HSP90AA1 | 3366 | 42864  | 16938  | 368.8752 | 149.2822 | -1.30509 | Down | 0        | 0        |
| C2orf43  | 2876 | 651.5  | 257.5  | 6.561519 | 2.655789 | -1.30489 | Down | 2.76E-40 | 1.77E-39 |
| COASY    | 1840 | 3581   | 1424.5 | 56.57184 | 22.90012 | -1.30473 | Down | #####    | #####    |
| C1orf135 | 2061 | 209    | 83.5   | 2.950703 | 1.195408 | -1.30356 | Down | 7.40E-14 | 2.69E-13 |
| SLC25A18 | 2087 | 433    | 172    | 6.025827 | 2.441643 | -1.30331 | Down | 4.43E-27 | 2.22E-26 |
| RPF1     | 1975 | 1790   | 710    | 26.30646 | 10.66471 | -1.30257 | Down | #####    | #####    |
| RBM24    | 2399 | 311    | 124    | 3.766664 | 1.527197 | -1.3024  | Down | 8.94E-20 | 3.81E-19 |
| C16orf53 | 3843 | 1081   | 431    | 8.173878 | 3.319382 | -1.30011 | Down | 1.05E-64 | 9.33E-64 |
| ACYP1    | 621  | 158    | 63     | 7.388879 | 3.001061 | -1.29988 | Down | 9.31E-11 | 2.73E-10 |
| C3orf37  | 1809 | 1103.5 | 439    | 17.72376 | 7.202082 | -1.2992  | Down | 3.57E-66 | 3.22E-65 |
| ADCY3    | 4410 | 995.5  | 397.5  | 6.556613 | 2.664617 | -1.29902 | Down | 1.25E-59 | 1.05E-58 |
| MRPS27   | 2797 | 2533.5 | 1009.5 | 26.28207 | 10.68179 | -1.29893 | Down | #####    | #####    |
| CLIC2    | 2702 | 187    | 74     | 1.997023 | 0.811719 | -1.2988  | Down | 1.29E-12 | 4.35E-12 |
| FLAD1    | 1911 | 1308.5 | 524    | 19.89861 | 8.091033 | -1.29827 | Down | 2.64E-77 | 2.68E-76 |



|           |      |        |        |          |          |          |      |          |          |
|-----------|------|--------|--------|----------|----------|----------|------|----------|----------|
| HIST1H3D  | 864  | 65.5   | 27     | 2.229711 | 0.907155 | -1.29744 | Down | 6.47E-05 | 0.000145 |
| THEM4     | 5172 | 484.5  | 193    | 2.727767 | 1.11002  | -1.29713 | Down | 6.73E-30 | 3.57E-29 |
| PSMC6     | 1599 | 2335.5 | 929    | 42.32891 | 17.23405 | -1.29638 | Down | #####    | #####    |
| NUFIP1    | 3487 | 677    | 269.5  | 5.630798 | 2.292843 | -1.2962  | Down | 2.13E-41 | 1.39E-40 |
| WDR67     | 3232 | 697    | 278.5  | 6.263825 | 2.551185 | -1.29588 | Down | 2.59E-42 | 1.72E-41 |
| AHSA1     | 1429 | 2253   | 898.5  | 45.73803 | 18.63391 | -1.29546 | Down | #####    | #####    |
| LOH12CR1  | 2085 | 222    | 89.5   | 3.106246 | 1.265566 | -1.29539 | Down | 2.01E-14 | 7.47E-14 |
| HEATR7B1  | 5110 | 51     | 21     | 0.293052 | 0.119422 | -1.29509 | Down | 0.000371 | 0.00079  |
| OSBPL11   | 4651 | 1207.5 | 482    | 7.536013 | 3.071104 | -1.29504 | Down | 7.51E-72 | 7.27E-71 |
| CAT       | 2300 | 2878.5 | 1150.5 | 36.30435 | 14.80447 | -1.29411 | Down | #####    | #####    |
| CYP4X1    | 2382 | 89     | 37     | 1.103024 | 0.449866 | -1.2939  | Down | 2.87E-06 | 6.93E-06 |
| CAND2     | 4248 | 65     | 27     | 0.453185 | 0.184843 | -1.2938  | Down | 6.47E-05 | 0.000145 |
| IFIT5     | 4034 | 1656   | 660    | 11.8989  | 4.855377 | -1.29317 | Down | 3.28E-98 | 3.96E-97 |
| HNRNPM    | 2436 | 11523  | 4610.5 | 137.3512 | 56.07326 | -1.29248 | Down | 0        | 0        |
| ABHD8     | 2114 | 429    | 172    | 5.895488 | 2.409104 | -1.29111 | Down | 1.87E-26 | 9.24E-26 |
| MRPL47    | 1222 | 923    | 368.5  | 21.87837 | 8.942671 | -1.29073 | Down | 1.65E-55 | 1.31E-54 |
| TBL3      | 2618 | 1352   | 544    | 15.00641 | 6.140919 | -1.28905 | Down | 2.87E-79 | 2.96E-78 |
| LOC731282 | 1038 | 108.5  | 43.5   | 3.034774 | 1.242429 | -1.28843 | Down | 8.54E-08 | 2.21E-07 |
| DCAF4     | 2468 | 245    | 98     | 2.878839 | 1.178641 | -1.28836 | Down | 8.08E-16 | 3.13E-15 |
| SMC6      | 5188 | 954    | 381.5  | 5.32104  | 2.178725 | -1.28822 | Down | 3.72E-57 | 3.01E-56 |
| LACTB2    | 1553 | 496    | 197.5  | 9.23793  | 3.784688 | -1.2874  | Down | 8.59E-31 | 4.63E-30 |
| FASTKD3   | 2451 | 513    | 205.5  | 6.056829 | 2.481649 | -1.28726 | Down | 1.74E-31 | 9.52E-31 |
| DTYMK     | 1227 | 2044   | 822.5  | 48.43591 | 19.84887 | -1.28702 | Down | #####    | #####    |
| SLC25A12  | 3995 | 1621   | 651.5  | 11.77417 | 4.833713 | -1.28442 | Down | 5.70E-95 | 6.74E-94 |
| TFAP4     | 2147 | 281    | 113.5  | 3.820209 | 1.569001 | -1.28381 | Down | 8.87E-18 | 3.60E-17 |

|          |      |        |        |          |          |          |      |          |          |
|----------|------|--------|--------|----------|----------|----------|------|----------|----------|
| BLM      | 4528 | 485.5  | 198    | 3.125695 | 1.284341 | -1.28315 | Down | 7.62E-29 | 3.96E-28 |
| ACTR5    | 2479 | 295    | 120    | 3.473222 | 1.427779 | -1.2825  | Down | 2.94E-18 | 1.21E-17 |
| DDAH2    | 1351 | 608.5  | 247    | 13.11931 | 5.393339 | -1.28244 | Down | 4.91E-36 | 2.94E-35 |
| MMAA     | 5943 | 362    | 146.5  | 1.76879  | 0.727427 | -1.28189 | Down | 2.33E-22 | 1.05E-21 |
| RIPK4    | 3890 | 492    | 199    | 3.680869 | 1.514197 | -1.28149 | Down | 1.11E-29 | 5.85E-29 |
| NAE1     | 1716 | 3116   | 1252.5 | 52.5684  | 21.62709 | -1.28136 | Down | #####    | #####    |
| QPRT     | 1575 | 140    | 57     | 2.582556 | 1.063095 | -1.28053 | Down | 2.12E-09 | 5.86E-09 |
| PHTF2    | 5025 | 4452   | 1790   | 25.66212 | 10.56926 | -1.27977 | Down | #####    | #####    |
| FAM54A   | 1523 | 126.5  | 50.5   | 2.388567 | 0.985822 | -1.27675 | Down | 6.48E-09 | 1.76E-08 |
| POLR1E   | 1854 | 904    | 365    | 14.12307 | 5.829999 | -1.27649 | Down | 2.73E-53 | 2.10E-52 |
| CENPW    | 567  | 741    | 299.5  | 37.95068 | 15.66644 | -1.27645 | Down | 4.88E-44 | 3.33E-43 |
| HYAL2    | 2413 | 1725.5 | 702    | 20.82163 | 8.599772 | -1.27571 | Down | 1.00E-98 | 1.21E-97 |
| FEN1     | 2308 | 2625.5 | 1062.5 | 33.01027 | 13.63425 | -1.27568 | Down | #####    | #####    |
| PDCL3    | 1086 | 973.5  | 391.5  | 25.98531 | 10.73311 | -1.27563 | Down | 1.13E-57 | 9.24E-57 |
| PRMT1    | 1473 | 5695.5 | 2310   | 112.4225 | 46.44379 | -1.27537 | Down | 0        | 0        |
| HIST1H1B | 790  | 64     | 27     | 2.401529 | 0.992129 | -1.27535 | Down | 9.26E-05 | 0.000206 |
| AGFG2    | 4821 | 785.5  | 319    | 4.731846 | 1.956259 | -1.27431 | Down | 5.18E-46 | 3.62E-45 |
| CCDC116  | 2252 | 34     | 14.5   | 0.454178 | 0.187816 | -1.27394 | Down | 0.003802 | 0.007461 |
| SS18L2   | 822  | 477.5  | 193    | 16.83311 | 6.966801 | -1.27273 | Down | 8.24E-29 | 4.28E-28 |
| RACGAP1  | 3326 | 3938.5 | 1593   | 34.33784 | 14.2117  | -1.27272 | Down | #####    | #####    |
| MIA2     | 2351 | 40.5   | 17     | 0.507372 | 0.210054 | -1.27228 | Down | 0.002233 | 0.004468 |
| FBXO5    | 2269 | 721.5  | 292.5  | 9.215197 | 3.816508 | -1.27176 | Down | 1.23E-42 | 8.19E-42 |
| KCNE4    | 2976 | 3003   | 1218.5 | 29.31693 | 12.14387 | -1.27151 | Down | #####    | #####    |
| ALG6     | 3371 | 478    | 193.5  | 4.107103 | 1.701408 | -1.27139 | Down | 5.77E-29 | 3.01E-28 |
| NQO2     | 1139 | 1007   | 409.5  | 25.72233 | 10.66311 | -1.27039 | Down | 1.39E-58 | 1.15E-57 |

|          |      |        |        |          |          |          |      |          |          |
|----------|------|--------|--------|----------|----------|----------|------|----------|----------|
| PDE6D    | 1140 | 488    | 198.5  | 12.39575 | 5.143507 | -1.26902 | Down | 2.63E-29 | 1.38E-28 |
| BRD7     | 2330 | 2869   | 1163.5 | 35.69844 | 14.81424 | -1.26888 | Down | #####    | #####    |
| MAT2B    | 2090 | 3472   | 1408.5 | 48.14218 | 19.98226 | -1.26858 | Down | #####    | #####    |
| EPHX1    | 1847 | 10227  | 4164   | 160.7751 | 66.73652 | -1.2685  | Down | 0        | 0        |
| TMEM160  | 696  | 192    | 79     | 8.053973 | 3.344623 | -1.26786 | Down | 3.53E-12 | 1.15E-11 |
| AQP3     | 1835 | 91     | 37.5   | 1.451006 | 0.60316  | -1.26644 | Down | 1.40E-06 | 3.42E-06 |
| SCML1    | 2693 | 805.5  | 327.5  | 8.660412 | 3.601618 | -1.26579 | Down | 3.59E-47 | 2.55E-46 |
| KIAA1383 | 5455 | 86.5   | 36     | 0.464436 | 0.193237 | -1.26511 | Down | 4.85E-06 | 1.16E-05 |
| KIAA1524 | 4284 | 1402   | 568    | 9.457909 | 3.936871 | -1.26447 | Down | 3.38E-81 | 3.56E-80 |
| STAT5A   | 4314 | 298.5  | 121    | 1.99989  | 0.832474 | -1.26444 | Down | 1.76E-18 | 7.28E-18 |
| NEURL1B  | 6417 | 327    | 134    | 1.482441 | 0.617132 | -1.26432 | Down | 7.72E-20 | 3.30E-19 |
| B4GALT6  | 4814 | 580.5  | 237.5  | 3.503898 | 1.458888 | -1.26409 | Down | 4.00E-34 | 2.31E-33 |
| ELOVL4   | 3085 | 43.5   | 18     | 0.414181 | 0.172468 | -1.26393 | Down | 0.001299 | 0.002654 |
| CENPI    | 2571 | 621    | 252    | 6.985015 | 2.910088 | -1.2632  | Down | 7.75E-37 | 4.69E-36 |
| ZBTB45   | 2393 | 735    | 301.5  | 8.935969 | 3.723934 | -1.2628  | Down | 1.22E-42 | 8.17E-42 |
| FAR2     | 2235 | 272.5  | 110.5  | 3.523555 | 1.468401 | -1.26279 | Down | 4.17E-17 | 1.67E-16 |
| DENND1B  | 8388 | 958.5  | 390.5  | 3.319327 | 1.383444 | -1.26263 | Down | 1.33E-55 | 1.06E-54 |
| CXorf57  | 3628 | 122    | 51     | 0.985775 | 0.41092  | -1.2624  | Down | 4.78E-08 | 1.25E-07 |
| FAM63A   | 2250 | 628    | 258    | 8.123492 | 3.387118 | -1.26204 | Down | 1.75E-36 | 1.05E-35 |
| RABL3    | 3883 | 1112.5 | 454.5  | 8.315602 | 3.467603 | -1.26188 | Down | 6.04E-64 | 5.31E-63 |
| DLX2     | 2308 | 606.5  | 249.5  | 7.642333 | 3.189899 | -1.2605  | Down | 2.97E-35 | 1.75E-34 |
| TRIM16   | 2920 | 4205   | 1722   | 41.80917 | 17.45469 | -1.2602  | Down | #####    | #####    |
| ZMYM1    | 4172 | 612.5  | 250.5  | 4.255335 | 1.777113 | -1.25974 | Down | 6.21E-36 | 3.70E-35 |
| CITED1   | 830  | 61     | 25     | 2.146158 | 0.897044 | -1.25851 | Down | 9.06E-05 | 0.000201 |
| LYSMD2   | 1118 | 332    | 135    | 8.581322 | 3.587235 | -1.25833 | Down | 2.28E-20 | 9.84E-20 |

|              |      |         |        |          |          |          |      |          |          |
|--------------|------|---------|--------|----------|----------|----------|------|----------|----------|
| DDX56        | 2499 | 2742    | 1122   | 31.79726 | 13.29829 | -1.25766 | Down | #####    | #####    |
| LOC100287837 | 1695 | 238.5   | 97.5   | 4.085325 | 1.709315 | -1.25703 | Down | 5.68E-15 | 2.14E-14 |
| ANLN         | 4786 | 9640.5  | 3943   | 58.35846 | 24.42266 | -1.25672 | Down | 0        | 0        |
| C1orf190     | 1863 | 95      | 39.5   | 1.492845 | 0.62476  | -1.25669 | Down | 1.01E-06 | 2.48E-06 |
| CTPS2        | 4334 | 582.5   | 239    | 3.900612 | 1.63262  | -1.25651 | Down | 5.90E-34 | 3.39E-33 |
| FDX1         | 3236 | 692.5   | 284    | 6.222572 | 2.606037 | -1.25565 | Down | 4.24E-40 | 2.70E-39 |
| NUDT12       | 3502 | 883     | 361    | 7.312102 | 3.063245 | -1.25523 | Down | 5.06E-51 | 3.79E-50 |
| AAMP         | 1859 | 2621    | 1080   | 40.99644 | 17.17685 | -1.25503 | Down | #####    | #####    |
| ALKBH8       | 4085 | 258     | 106    | 1.830392 | 0.76698  | -1.25489 | Down | 6.64E-16 | 2.58E-15 |
| POU6F1       | 4715 | 154     | 64.5   | 0.960432 | 0.40249  | -1.25473 | Down | 6.81E-10 | 1.92E-09 |
| GCSH         | 1538 | 1165    | 476.5  | 21.90881 | 9.187486 | -1.25377 | Down | 8.02E-67 | 7.32E-66 |
| HVCN1        | 1736 | 65      | 27     | 1.095727 | 0.459734 | -1.25302 | Down | 6.47E-05 | 0.000145 |
| TUBGCP4      | 3087 | 852     | 349    | 7.988308 | 3.352418 | -1.25269 | Down | 3.92E-49 | 2.87E-48 |
| GPR18        | 1484 | 39      | 17     | 0.789489 | 0.331327 | -1.25266 | Down | 0.003202 | 0.006323 |
| PDCD2L       | 1174 | 248     | 103    | 6.178024 | 2.593622 | -1.25218 | Down | 4.39E-15 | 1.66E-14 |
| DLX6         | 1892 | 34      | 14     | 0.522402 | 0.219314 | -1.25216 | Down | 0.003802 | 0.007462 |
| XRCC5        | 3448 | 12532.5 | 5146.5 | 105.2895 | 44.23978 | -1.25095 | Down | 0        | 0        |
| MYBPH        | 1806 | 41      | 18     | 0.686003 | 0.288268 | -1.2508  | Down | 0.00267  | 0.005305 |
| WDR74        | 1385 | 851.5   | 351    | 17.85207 | 7.503571 | -1.25044 | Down | 1.65E-48 | 1.19E-47 |
| LOC653375    | 805  | 748     | 308    | 26.95475 | 11.33647 | -1.24957 | Down | 5.74E-43 | 3.85E-42 |
| WSCD2        | 4650 | 37      | 16     | 0.237974 | 0.100135 | -1.24885 | Down | 0.003838 | 0.007525 |
| OASL         | 1584 | 60      | 25.5   | 1.121425 | 0.471942 | -1.24865 | Down | 0.00013  | 0.000287 |
| PCDH20       | 4786 | 167.5   | 71     | 1.029502 | 0.433556 | -1.24765 | Down | 3.05E-10 | 8.72E-10 |
| DHX37        | 4568 | 2140    | 885    | 13.61717 | 5.736375 | -1.24722 | Down | #####    | #####    |
| CPA1         | 1445 | 51      | 22     | 1.056975 | 0.445303 | -1.24708 | Down | 0.000643 | 0.001344 |

|           |      |        |        |          |          |          |      |          |          |
|-----------|------|--------|--------|----------|----------|----------|------|----------|----------|
| C9orf46   | 1020 | 577.5  | 236.5  | 16.3919  | 6.906143 | -1.24703 | Down | 6.67E-34 | 3.83E-33 |
| ABCA6     | 5296 | 305.5  | 125.5  | 1.670088 | 0.703636 | -1.24702 | Down | 1.33E-18 | 5.52E-18 |
| NLRC5     | 6822 | 1037   | 429.5  | 4.423611 | 1.863844 | -1.24694 | Down | 1.98E-58 | 1.64E-57 |
| CCDC61    | 1825 | 165.5  | 69     | 2.644713 | 1.114703 | -1.24645 | Down | 2.11E-10 | 6.09E-10 |
| P2RX6     | 2754 | 483.5  | 200.5  | 5.086347 | 2.144147 | -1.24623 | Down | 4.55E-28 | 2.33E-27 |
| ABHD15    | 3365 | 617    | 255    | 5.318654 | 2.243045 | -1.2456  | Down | 1.62E-35 | 9.63E-35 |
| HIST2H2BE | 2223 | 489    | 202    | 6.379163 | 2.691927 | -1.24473 | Down | 1.65E-28 | 8.49E-28 |
| MRPL24    | 894  | 1789   | 738.5  | 57.97773 | 24.47101 | -1.24443 | Down | #####    | 6.97E-99 |
| MCM2      | 3453 | 3590   | 1486   | 30.1677  | 12.73803 | -1.24386 | Down | #####    | #####    |
| CDH24     | 3453 | 329.5  | 136.5  | 2.763863 | 1.167393 | -1.2434  | Down | 1.13E-19 | 4.81E-19 |
| FANCG     | 2649 | 1055.5 | 438    | 11.57116 | 4.887923 | -1.24324 | Down | 4.72E-59 | 3.95E-58 |
| TNFAIP8L1 | 3817 | 675    | 280    | 5.137472 | 2.171365 | -1.24246 | Down | 1.86E-38 | 1.15E-37 |
| DOCK10    | 7431 | 2155   | 893.5  | 8.407993 | 3.55493  | -1.24194 | Down | #####    | #####    |
| HMGB2     | 1454 | 3755   | 1552.5 | 74.96487 | 31.70242 | -1.24162 | Down | #####    | #####    |
| CSE1L     | 3579 | 11579  | 4785.5 | 93.75714 | 39.65116 | -1.24157 | Down | 0        | 0        |
| IRF3      | 1245 | 1661.5 | 690    | 38.79016 | 16.40499 | -1.24156 | Down | 7.83E-92 | 9.01E-91 |
| GBGT1     | 1949 | 59     | 25     | 0.884131 | 0.373935 | -1.24147 | Down | 0.000187 | 0.000406 |
| EML5      | 7171 | 62.5   | 27     | 0.259366 | 0.109698 | -1.24145 | Down | 0.000188 | 0.000408 |
| TOMM40L   | 2713 | 783    | 328    | 8.430551 | 3.565887 | -1.24137 | Down | 1.34E-43 | 9.05E-43 |
| RBMX      | 2097 | 7511   | 3110   | 103.8631 | 43.97199 | -1.24003 | Down | 0        | 0        |
| MID1IP1   | 2454 | 1811   | 755    | 21.46531 | 9.089502 | -1.23973 | Down | 2.46E-99 | 2.99E-98 |
| HMG20B    | 1584 | 1892   | 786.5  | 34.69008 | 14.69362 | -1.23933 | Down | #####    | #####    |
| C18orf45  | 2994 | 401    | 166.5  | 3.888132 | 1.647168 | -1.23909 | Down | 1.39E-23 | 6.47E-23 |
| MRPS28    | 724  | 607    | 252.5  | 24.35016 | 10.31742 | -1.23885 | Down | 1.06E-34 | 6.15E-34 |
| TMEM121   | 1538 | 82     | 34     | 1.548412 | 0.656143 | -1.23871 | Down | 6.78E-06 | 1.61E-05 |

|          |       |        |        |          |          |          |      |          |          |
|----------|-------|--------|--------|----------|----------|----------|------|----------|----------|
| ANKRD44  | 1638  | 304.5  | 126.5  | 5.404417 | 2.290476 | -1.23849 | Down | 3.25E-18 | 1.33E-17 |
| MRPL52   | 1120  | 1278   | 532    | 33.17932 | 14.06624 | -1.23805 | Down | 7.94E-71 | 7.58E-70 |
| ETAA1    | 3298  | 810.5  | 337    | 7.148136 | 3.030528 | -1.238   | Down | 1.41E-45 | 9.79E-45 |
| CCNE2    | 2739  | 674    | 280    | 7.135011 | 3.027787 | -1.23665 | Down | 2.63E-38 | 1.63E-37 |
| CYP2S1   | 2657  | 810.5  | 337.5  | 8.85621  | 3.758734 | -1.23644 | Down | 1.41E-45 | 9.79E-45 |
| PSME2    | 829   | 4754   | 1975   | 166.3616 | 70.61089 | -1.23636 | Down | #####    | #####    |
| APOL6    | 10156 | 2981   | 1237   | 8.509089 | 3.611682 | -1.23633 | Down | #####    | #####    |
| TLR1     | 2867  | 183.5  | 77     | 1.866415 | 0.792771 | -1.23529 | Down | 2.83E-11 | 8.50E-11 |
| SNRPD1   | 1614  | 2756.5 | 1144.5 | 49.48839 | 21.02169 | -1.23521 | Down | #####    | #####    |
| ZNF642   | 2176  | 143    | 60     | 1.921474 | 0.817243 | -1.23338 | Down | 3.77E-09 | 1.03E-08 |
| COPS4    | 1765  | 1550   | 644.5  | 25.41981 | 10.81524 | -1.23289 | Down | 8.55E-86 | 9.39E-85 |
| MRPL34   | 968   | 1526   | 638.5  | 45.83583 | 19.517   | -1.23174 | Down | 1.41E-83 | 1.51E-82 |
| PRICKLE3 | 1990  | 471.5  | 198    | 6.90416  | 2.940703 | -1.2313  | Down | 1.01E-26 | 5.01E-26 |
| ALG14    | 1057  | 528    | 220.5  | 14.50721 | 6.179859 | -1.23112 | Down | 3.25E-30 | 1.73E-29 |
| BEND6    | 2727  | 148.5  | 62     | 1.582818 | 0.674904 | -1.22974 | Down | 1.91E-09 | 5.29E-09 |
| HADH     | 2037  | 1140.5 | 476    | 16.25446 | 6.9308   | -1.22974 | Down | 4.86E-63 | 4.21E-62 |
| PFKM     | 3088  | 3117.5 | 1301.5 | 29.28302 | 12.48963 | -1.22933 | Down | #####    | #####    |
| RPP25    | 2333  | 62     | 25.5   | 0.764676 | 0.326256 | -1.22885 | Down | 6.27E-05 | 0.000141 |
| GK       | 4590  | 527.5  | 221    | 3.336726 | 1.424085 | -1.2284  | Down | 7.82E-30 | 4.14E-29 |
| PFDN4    | 1383  | 1015   | 423    | 21.25528 | 9.072443 | -1.22826 | Down | 1.65E-56 | 1.33E-55 |
| ATP5G3   | 3305  | 6834   | 2857.5 | 60.01856 | 25.62137 | -1.22806 | Down | 0        | 0        |
| TIGD2    | 2101  | 587.5  | 246.5  | 8.143323 | 3.476511 | -1.22798 | Down | 4.42E-33 | 2.50E-32 |
| TAF5     | 3283  | 357.5  | 150    | 3.156661 | 1.348303 | -1.22725 | Down | 1.19E-20 | 5.15E-20 |
| L3MBTL2  | 3205  | 1163   | 488.5  | 10.5376  | 4.504409 | -1.22614 | Down | 1.00E-63 | 8.79E-63 |
| WDR46    | 2201  | 1991.5 | 834    | 26.25909 | 11.22578 | -1.226   | Down | #####    | #####    |

|            |      |        |        |          |          |          |      |          |          |
|------------|------|--------|--------|----------|----------|----------|------|----------|----------|
| TTC27      | 2953 | 803.5  | 336    | 7.886368 | 3.371641 | -1.22591 | Down | 9.32E-45 | 6.40E-44 |
| MRPL18     | 994  | 1317   | 550.5  | 38.38951 | 16.42071 | -1.2252  | Down | 1.59E-72 | 1.55E-71 |
| BTN3A3     | 2927 | 1312.5 | 552    | 13.03441 | 5.577305 | -1.22468 | Down | 2.55E-71 | 2.45E-70 |
| PKMYT1     | 2187 | 1249.5 | 526.5  | 16.62572 | 7.114459 | -1.22459 | Down | 7.23E-68 | 6.68E-67 |
| NDRG4      | 3581 | 548.5  | 230.5  | 4.445771 | 1.902472 | -1.22456 | Down | 6.51E-31 | 3.52E-30 |
| ECSIT      | 1725 | 1040   | 436.5  | 17.51305 | 7.495522 | -1.22433 | Down | 2.91E-57 | 2.37E-56 |
| ABCC4      | 3077 | 6429.5 | 2696   | 60.61538 | 25.95854 | -1.22347 | Down | 0        | 0        |
| ST20-MTHFS | 2282 | 94.5   | 39.5   | 1.198546 | 0.513498 | -1.22285 | Down | 1.44E-06 | 3.53E-06 |
| HAT1       | 1682 | 1904   | 796    | 32.75077 | 14.03406 | -1.2226  | Down | #####    | #####    |
| SMC4       | 5297 | 7833.5 | 3272.5 | 42.7955  | 18.34971 | -1.2217  | Down | 0        | 0        |
| TTC23      | 3440 | 705    | 297    | 5.950686 | 2.552056 | -1.2214  | Down | 4.83E-39 | 3.03E-38 |
| NUP205     | 6286 | 7337.5 | 3075.5 | 33.80211 | 14.49898 | -1.22116 | Down | 0        | 0        |
| HSPA14     | 1810 | 692    | 290.5  | 11.0691  | 4.748822 | -1.2209  | Down | 1.06E-38 | 6.59E-38 |
| KIAA0889   | 3728 | 2374   | 1003   | 18.56396 | 7.966465 | -1.22049 | Down | #####    | #####    |
| RBM42      | 1669 | 3032.5 | 1279.5 | 52.84841 | 22.68644 | -1.22003 | Down | #####    | #####    |
| DNAJC9     | 1450 | 1879.5 | 790.5  | 37.56421 | 16.12982 | -1.21963 | Down | #####    | #####    |
| HTATIP2    | 782  | 1161   | 486.5  | 43.01534 | 18.4714  | -1.21956 | Down | 6.95E-64 | 6.11E-63 |
| NDC80      | 2209 | 1642.5 | 688    | 21.54262 | 9.256663 | -1.21863 | Down | 1.91E-89 | 2.16E-88 |
| SETDB2     | 5636 | 808.5  | 339.5  | 4.15747  | 1.788734 | -1.21677 | Down | 8.13E-45 | 5.59E-44 |
| UTP20      | 9029 | 1755   | 738    | 5.621624 | 2.419079 | -1.21653 | Down | 7.25E-95 | 8.55E-94 |
| SNAI1      | 1722 | 769    | 325    | 12.94065 | 5.569307 | -1.21634 | Down | 3.39E-42 | 2.24E-41 |
| NOL7       | 896  | 1897   | 798    | 61.45604 | 26.45688 | -1.21591 | Down | #####    | #####    |
| GSDMD      | 1772 | 1682.5 | 712    | 27.60738 | 11.88719 | -1.21565 | Down | 6.24E-90 | 7.09E-89 |
| CCT6A      | 2682 | 21921  | 9228.5 | 236.9279 | 102.0251 | -1.21552 | Down | 0        | 0        |
| ATE1       | 2224 | 436.5  | 185    | 5.699607 | 2.454828 | -1.21524 | Down | 1.82E-24 | 8.66E-24 |

|           |      |        |         |          |          |          |      |          |          |
|-----------|------|--------|---------|----------|----------|----------|------|----------|----------|
| TRABD     | 2315 | 1187   | 503     | 14.91097 | 6.42254  | -1.21516 | Down | 6.99E-64 | 6.14E-63 |
| HDGF      | 2397 | 14608  | 6160.5  | 176.8664 | 76.18345 | -1.21511 | Down | 0        | 0        |
| HINT3     | 3396 | 868.5  | 366.5   | 7.419086 | 3.196216 | -1.21488 | Down | 1.34E-47 | 9.58E-47 |
| PARP12    | 3805 | 1913   | 808     | 14.59177 | 6.287822 | -1.21452 | Down | #####    | #####    |
| IDH3A     | 2701 | 2410.5 | 1018    | 25.9217  | 11.17154 | -1.21433 | Down | #####    | #####    |
| AHCYL1    | 4044 | 8687   | 3660.5  | 62.2419  | 26.838   | -1.21361 | Down | 0        | 0        |
| PCGF6     | 2023 | 633.5  | 267     | 9.079176 | 3.91638  | -1.21304 | Down | 3.77E-35 | 2.22E-34 |
| FAM164A   | 3352 | 446.5  | 189     | 3.860452 | 1.666244 | -1.21217 | Down | 4.80E-25 | 2.31E-24 |
| DGKI      | 4780 | 148    | 63.5    | 0.905361 | 0.390816 | -1.212   | Down | 3.25E-09 | 8.91E-09 |
| CWC27     | 2093 | 1229   | 519     | 17.05889 | 7.364537 | -1.21186 | Down | 1.74E-66 | 1.58E-65 |
| ERCC6L    | 4224 | 1021   | 441.5   | 7.069855 | 3.052222 | -1.21182 | Down | 2.46E-53 | 1.90E-52 |
| AIFM1     | 2289 | 2522   | 1067.5  | 31.99866 | 13.81654 | -1.21161 | Down | #####    | #####    |
| CAP2      | 3080 | 1811   | 766     | 17.04705 | 7.360725 | -1.2116  | Down | 8.03E-97 | 9.58E-96 |
| RNFT1     | 2031 | 581    | 246     | 8.310896 | 3.589916 | -1.21105 | Down | 3.47E-32 | 1.93E-31 |
| DHX57     | 4845 | 966    | 411.5   | 5.80053  | 2.505999 | -1.2108  | Down | 6.04E-52 | 4.57E-51 |
| DNAJC12   | 1218 | 392    | 166     | 9.333301 | 4.032376 | -1.21076 | Down | 3.14E-22 | 1.41E-21 |
| NCAPG     | 4682 | 2459   | 1037.5  | 15.22092 | 6.576528 | -1.21066 | Down | #####    | #####    |
| KIF18A    | 3463 | 1303   | 550     | 10.89595 | 4.708305 | -1.21051 | Down | 1.95E-70 | 1.85E-69 |
| CISH      | 2128 | 88     | 37.5    | 1.197835 | 0.517758 | -1.21008 | Down | 4.10E-06 | 9.82E-06 |
| KIF4A     | 4504 | 2831   | 1196.5  | 18.22957 | 7.879878 | -1.21004 | Down | #####    | #####    |
| TRIM59    | 3886 | 388    | 165.5   | 2.901936 | 1.255185 | -1.20912 | Down | 7.33E-22 | 3.27E-21 |
| PTCD2     | 2103 | 404    | 171     | 5.55401  | 2.402846 | -1.20879 | Down | 7.01E-23 | 3.21E-22 |
| BIN1      | 2333 | 2268.5 | 963.5   | 28.25686 | 12.22523 | -1.20874 | Down | #####    | #####    |
| HNRNPA2B1 | 3666 | 43020  | 18193.5 | 340.1526 | 147.2915 | -1.20751 | Down | 0        | 0        |
| NDRG2     | 2075 | 99.5   | 43      | 1.405303 | 0.609025 | -1.20631 | Down | 2.10E-06 | 5.10E-06 |



|          |      |        |        |          |          |          |      |          |          |
|----------|------|--------|--------|----------|----------|----------|------|----------|----------|
| UBE2L6   | 1283 | 3665   | 1557   | 82.95643 | 35.95166 | -1.2063  | Down | #####    | #####    |
| PRR16    | 1798 | 45.5   | 20     | 0.757025 | 0.328093 | -1.20624 | Down | 0.001858 | 0.003742 |
| TTC38    | 2616 | 516    | 220    | 5.7213   | 2.479691 | -1.20618 | Down | 2.01E-28 | 1.03E-27 |
| NOXO1    | 1587 | 67     | 28.5   | 1.224392 | 0.530685 | -1.20614 | Down | 5.46E-05 | 0.000123 |
| DOLPP1   | 2225 | 964    | 409.5  | 12.55673 | 5.446327 | -1.2051  | Down | 4.23E-52 | 3.20E-51 |
| CCDC8    | 3336 | 386.5  | 164.5  | 3.365066 | 1.459677 | -1.20499 | Down | 8.63E-22 | 3.84E-21 |
| TXNRD3NB | 1165 | 38     | 17     | 0.975789 | 0.42328  | -1.20496 | Down | 0.004562 | 0.008865 |
| KRT4     | 2147 | 92.5   | 40.5   | 1.268206 | 0.550256 | -1.20461 | Down | 4.95E-06 | 1.18E-05 |
| MRPS7    | 1432 | 1612   | 686.5  | 32.67855 | 14.18203 | -1.20428 | Down | 1.90E-85 | 2.08E-84 |
| CCT3     | 2107 | 11890  | 5055.5 | 163.6611 | 71.06176 | -1.20357 | Down | 0        | 0        |
| METTL4   | 3691 | 597.5  | 254.5  | 4.694225 | 2.039657 | -1.20256 | Down | 9.47E-33 | 5.32E-32 |
| LIPH     | 2478 | 51     | 22     | 0.601537 | 0.261403 | -1.20238 | Down | 0.000643 | 0.001344 |
| COX10    | 3016 | 713.5  | 304.5  | 6.885352 | 2.993199 | -1.20184 | Down | 1.21E-38 | 7.50E-38 |
| CDAN1    | 4757 | 932    | 397.5  | 5.6962   | 2.477017 | -1.2014  | Down | 4.49E-50 | 3.33E-49 |
| PDE4B    | 4273 | 587.5  | 253    | 4.013943 | 1.745664 | -1.20124 | Down | 1.68E-31 | 9.16E-31 |
| DCAF15   | 2274 | 821.5  | 352    | 10.50459 | 4.569616 | -1.20088 | Down | 8.33E-44 | 5.66E-43 |
| PDCD2    | 1961 | 1152   | 491    | 17.02944 | 7.409694 | -1.20054 | Down | 2.05E-61 | 1.75E-60 |
| ZNF816   | 2760 | 311    | 132.5  | 3.268591 | 1.422483 | -1.20026 | Down | 6.95E-18 | 2.83E-17 |
| KIAA0146 | 3253 | 1940   | 824.5  | 17.27526 | 7.518226 | -1.20024 | Down | #####    | #####    |
| BLMH     | 2543 | 1947.5 | 830    | 22.21422 | 9.668594 | -1.20011 | Down | #####    | #####    |
| TMEM126A | 818  | 915.5  | 390    | 32.46287 | 14.13354 | -1.19967 | Down | 3.87E-49 | 2.83E-48 |
| PPM1B    | 1776 | 1451   | 617.5  | 23.68519 | 10.31419 | -1.19935 | Down | 3.30E-77 | 3.35E-76 |
| ACSF2    | 2257 | 475    | 203.5  | 6.101221 | 2.657278 | -1.19915 | Down | 3.48E-26 | 1.71E-25 |
| MRPL15   | 1749 | 1757.5 | 749.5  | 29.16387 | 12.70375 | -1.19893 | Down | 1.12E-92 | 1.30E-91 |
| TDRKH    | 2343 | 355.5  | 152    | 4.415424 | 1.923394 | -1.1989  | Down | 6.70E-20 | 2.86E-19 |

|              |      |        |        |          |          |          |      |          |          |
|--------------|------|--------|--------|----------|----------|----------|------|----------|----------|
| NAA15        | 5554 | 4150.5 | 1765   | 21.63619 | 9.429032 | -1.19827 | Down | #####    | #####    |
| TPMT         | 3258 | 984    | 420    | 8.756338 | 3.816432 | -1.1981  | Down | 1.40E-52 | 1.07E-51 |
| TFDP2        | 9185 | 1594   | 681    | 5.039948 | 2.196945 | -1.19791 | Down | 6.41E-84 | 6.91E-83 |
| LOC100652810 | 605  | 59.5   | 25.5   | 2.869397 | 1.251009 | -1.19766 | Down | 0.000187 | 0.000406 |
| SAAL1        | 1545 | 570    | 243    | 10.69446 | 4.66301  | -1.19753 | Down | 3.11E-31 | 1.70E-30 |
| RNASEH2A     | 1148 | 1214.5 | 520    | 30.7376  | 13.40275 | -1.19748 | Down | 4.77E-64 | 4.20E-63 |
| ATPBD4       | 2139 | 402    | 171.5  | 5.461785 | 2.381548 | -1.19747 | Down | 1.39E-22 | 6.32E-22 |
| TFEB         | 2198 | 240    | 103.5  | 3.175219 | 1.385051 | -1.19692 | Down | 6.97E-14 | 2.54E-13 |
| MRPS16       | 2651 | 3855.5 | 1650   | 42.22622 | 18.42005 | -1.19686 | Down | #####    | #####    |
| TYSND1       | 3802 | 692.5  | 295.5  | 5.293508 | 2.310081 | -1.19628 | Down | 1.44E-37 | 8.85E-37 |
| JRK          | 9116 | 1536.5 | 660    | 4.902223 | 2.140036 | -1.1958  | Down | 4.30E-80 | 4.49E-79 |
| C2CD2        | 5848 | 1930   | 823.5  | 9.565887 | 4.176764 | -1.19551 | Down | #####    | #####    |
| POC1A        | 2069 | 584.5  | 249.5  | 8.196063 | 3.57879  | -1.19546 | Down | 5.93E-32 | 3.28E-31 |
| NTHL1        | 1067 | 439    | 187.5  | 11.91636 | 5.203939 | -1.19527 | Down | 1.85E-24 | 8.79E-24 |
| TRMT5        | 5302 | 574.5  | 246    | 3.141574 | 1.372194 | -1.195   | Down | 3.76E-31 | 2.04E-30 |
| CNDP2        | 5089 | 2774.5 | 1188.5 | 15.83279 | 6.91579  | -1.19495 | Down | #####    | #####    |
| EFR3B        | 7500 | 61.5   | 26.5   | 0.238758 | 0.104294 | -1.19489 | Down | 0.000157 | 0.000344 |
| NIP7         | 2187 | 2023.5 | 864    | 26.81108 | 11.7137  | -1.19463 | Down | #####    | #####    |
| HIST1H1A     | 781  | 46     | 21     | 1.779782 | 0.777697 | -1.19442 | Down | 0.002186 | 0.004381 |
| DAB1         | 2580 | 57     | 26     | 0.666709 | 0.291471 | -1.1937  | Down | 0.000628 | 0.001314 |
| PNPT1        | 4579 | 1627   | 697.5  | 10.30458 | 4.507158 | -1.193   | Down | 3.40E-85 | 3.72E-84 |
| WDR83        | 1219 | 210    | 90.5   | 5.01269  | 2.193072 | -1.19263 | Down | 2.35E-12 | 7.75E-12 |
| ZC3HC1       | 1945 | 1435.5 | 615    | 21.43417 | 9.379346 | -1.19235 | Down | 2.65E-75 | 2.65E-74 |
| CCNO         | 1448 | 373    | 160.5  | 7.499469 | 3.282015 | -1.19221 | Down | 9.13E-21 | 3.97E-20 |
| MRPS15       | 965  | 2800.5 | 1201   | 84.13004 | 36.81963 | -1.19215 | Down | #####    | #####    |

|          |      |        |        |          |          |          |      |          |          |
|----------|------|--------|--------|----------|----------|----------|------|----------|----------|
| CXorf38  | 4260 | 1556.5 | 667.5  | 10.58987 | 4.635438 | -1.19191 | Down | 1.82E-81 | 1.93E-80 |
| UBL7     | 1461 | 1394   | 601    | 27.7543  | 12.15941 | -1.19064 | Down | 2.06E-72 | 2.01E-71 |
| CHTF18   | 3096 | 1059   | 455.5  | 9.928374 | 4.350084 | -1.19051 | Down | 8.67E-56 | 6.91E-55 |
| C2orf18  | 3912 | 2874.5 | 1237   | 21.33627 | 9.348713 | -1.19047 | Down | #####    | #####    |
| CDC25A   | 3717 | 664    | 285.5  | 5.184719 | 2.272386 | -1.19006 | Down | 1.11E-35 | 6.60E-35 |
| PRKD1    | 3679 | 413    | 178    | 3.25683  | 1.428164 | -1.18931 | Down | 1.22E-22 | 5.56E-22 |
| SNRNP35  | 935  | 324    | 139.5  | 10.09314 | 4.428537 | -1.18847 | Down | 3.10E-18 | 1.27E-17 |
| SYTL5    | 4821 | 86.5   | 37.5   | 0.519325 | 0.227945 | -1.18795 | Down | 8.27E-06 | 1.95E-05 |
| SLC15A3  | 2134 | 911    | 392    | 12.37557 | 5.433676 | -1.18749 | Down | 4.18E-48 | 3.01E-47 |
| NUP62    | 3241 | 3072   | 1324.5 | 27.55643 | 12.10196 | -1.18715 | Down | #####    | #####    |
| CCHCR1   | 2974 | 1030.5 | 448    | 10.10781 | 4.43971  | -1.18693 | Down | 4.15E-53 | 3.19E-52 |
| SULT1C2  | 2832 | 42     | 19     | 0.440849 | 0.194045 | -1.18389 | Down | 0.003156 | 0.006238 |
| TPP2     | 4716 | 3355.5 | 1442.5 | 20.5781  | 9.060611 | -1.18343 | Down | #####    | #####    |
| MED24    | 3735 | 2480.5 | 1073.5 | 19.29095 | 8.495361 | -1.18318 | Down | #####    | #####    |
| HACL1    | 2037 | 424    | 183    | 6.043607 | 2.661627 | -1.1831  | Down | 3.83E-23 | 1.77E-22 |
| POLA1    | 5455 | 1249.5 | 538.5  | 6.636919 | 2.924196 | -1.18247 | Down | 3.55E-65 | 3.18E-64 |
| ZNF512   | 3460 | 1429   | 616    | 11.95839 | 5.270717 | -1.18195 | Down | 3.33E-74 | 3.28E-73 |
| PNO1     | 1994 | 1640.5 | 708    | 23.87885 | 10.52582 | -1.1818  | Down | 1.17E-84 | 1.27E-83 |
| RPUSD1   | 2067 | 1173.5 | 509.5  | 16.51541 | 7.28165  | -1.18148 | Down | 1.69E-60 | 1.43E-59 |
| TMEM126B | 1205 | 1058   | 454    | 25.37148 | 11.18638 | -1.18146 | Down | 7.29E-56 | 5.82E-55 |
| WDR3     | 3877 | 2480   | 1069.5 | 18.54055 | 8.181322 | -1.18028 | Down | #####    | #####    |
| TMEM180  | 2834 | 211    | 92     | 2.165172 | 0.955593 | -1.18001 | Down | 4.66E-12 | 1.50E-11 |
| PAFAH1B3 | 1086 | 797    | 345.5  | 21.34474 | 9.421015 | -1.17993 | Down | 7.57E-42 | 4.98E-41 |
| KIAA0391 | 2684 | 802.5  | 346.5  | 8.673205 | 3.829107 | -1.17956 | Down | 2.35E-42 | 1.56E-41 |
| TUSC1    | 2477 | 448.5  | 194.5  | 5.261062 | 2.322823 | -1.17948 | Down | 3.19E-24 | 1.51E-23 |

|           |      |        |        |          |          |          |      |          |          |
|-----------|------|--------|--------|----------|----------|----------|------|----------|----------|
| TCF7L2    | 4022 | 586    | 252    | 4.213514 | 1.860939 | -1.17899 | Down | 1.41E-31 | 7.73E-31 |
| ISOC2     | 1170 | 2003   | 870.5  | 49.82595 | 22.00734 | -1.17891 | Down | #####    | #####    |
| C14orf142 | 1191 | 240.5  | 104    | 5.883175 | 2.598915 | -1.17869 | Down | 1.16E-13 | 4.20E-13 |
| RPUSD4    | 2527 | 908    | 393.5  | 10.42186 | 4.606647 | -1.17782 | Down | 1.90E-47 | 1.36E-46 |
| CLDN22    | 2708 | 54     | 23.5   | 0.579685 | 0.256279 | -1.17755 | Down | 0.000378 | 0.000804 |
| ESPL1     | 6641 | 1385   | 601.5  | 6.056963 | 2.678397 | -1.17722 | Down | 4.19E-71 | 4.01E-70 |
| SF3A2     | 1678 | 3435   | 1491.5 | 59.5561  | 26.33834 | -1.17708 | Down | #####    | #####    |
| SALL1     | 5253 | 1550.5 | 674    | 8.582557 | 3.796058 | -1.17691 | Down | 4.73E-79 | 4.87E-78 |
| GTPBP6    | 1877 | 2244   | 977    | 34.73941 | 15.37733 | -1.17577 | Down | #####    | #####    |
| TIAF1     | 2110 | 219.5  | 96     | 3.030376 | 1.341706 | -1.17543 | Down | 2.38E-12 | 7.86E-12 |
| CYC1      | 1235 | 5812.5 | 2526   | 136.6819 | 60.51875 | -1.17537 | Down | #####    | #####    |
| TREX1     | 1515 | 674    | 294    | 12.94346 | 5.73277  | -1.17492 | Down | 3.70E-35 | 2.18E-34 |
| RRM1      | 3234 | 5443.5 | 2357   | 48.76564 | 21.60412 | -1.17456 | Down | #####    | #####    |
| CEP57L1   | 2915 | 299    | 129    | 2.966458 | 1.314328 | -1.17442 | Down | 8.80E-17 | 3.49E-16 |
| DNMT1     | 5425 | 7570.5 | 3283.5 | 40.44076 | 17.92461 | -1.17387 | Down | 0        | 0        |
| C1orf216  | 2934 | 1676.5 | 730    | 16.58793 | 7.354313 | -1.17347 | Down | 4.60E-85 | 5.01E-84 |
| DUS3L     | 2127 | 1273   | 556    | 17.41184 | 7.720665 | -1.17327 | Down | 1.02E-64 | 9.08E-64 |
| SETD1B    | 8195 | 1538.5 | 669.5  | 5.457456 | 2.420014 | -1.17321 | Down | 2.09E-78 | 2.14E-77 |
| PCCA      | 2577 | 531    | 230    | 5.961066 | 2.643619 | -1.17306 | Down | 2.11E-28 | 1.09E-27 |
| KLHL38    | 1834 | 115    | 52     | 1.868501 | 0.828647 | -1.17305 | Down | 8.74E-07 | 2.16E-06 |
| FAM203B   | 2404 | 654.5  | 285    | 7.907561 | 3.507486 | -1.1728  | Down | 3.18E-34 | 1.83E-33 |
| USP1      | 3519 | 3762.5 | 1632.5 | 31.02511 | 13.76363 | -1.17258 | Down | #####    | #####    |
| EXOSC9    | 1593 | 1431.5 | 618.5  | 26.01314 | 11.54552 | -1.17191 | Down | 4.69E-74 | 4.62E-73 |
| TSFM      | 2102 | 972.5  | 423    | 13.41532 | 5.954184 | -1.17191 | Down | 3.63E-50 | 2.69E-49 |
| CCDC89    | 2428 | 119    | 54     | 1.455964 | 0.646209 | -1.1719  | Down | 6.18E-07 | 1.54E-06 |

|             |      |        |        |          |          |          |      |          |          |
|-------------|------|--------|--------|----------|----------|----------|------|----------|----------|
| WDR18       | 1551 | 1186   | 518.5  | 22.25935 | 9.880771 | -1.17172 | Down | 2.04E-60 | 1.72E-59 |
| KLRC4-KLRK1 | 1947 | 43.5   | 19     | 0.647424 | 0.287394 | -1.17168 | Down | 0.002228 | 0.004459 |
| CCL2        | 760  | 3105   | 1346.5 | 118.2143 | 52.48058 | -1.17155 | Down | #####    | #####    |
| ZNF300      | 3282 | 549.5  | 242.5  | 4.884125 | 2.170203 | -1.17027 | Down | 2.14E-28 | 1.10E-27 |
| CCDC73      | 4015 | 100    | 44     | 0.724039 | 0.321777 | -1.17001 | Down | 2.49E-06 | 6.04E-06 |
| SCARA5      | 4170 | 49.5   | 22     | 0.351819 | 0.156367 | -1.1699  | Down | 0.001294 | 0.002644 |
| PSMG2       | 1141 | 1700   | 740.5  | 43.23983 | 19.2243  | -1.16943 | Down | 2.36E-86 | 2.60E-85 |
| SMARCB1     | 1690 | 1699.5 | 741.5  | 29.20199 | 12.98577 | -1.16913 | Down | 5.42E-86 | 5.97E-85 |
| DLG3        | 5087 | 487.5  | 212    | 2.77673  | 1.234907 | -1.16898 | Down | 5.99E-26 | 2.93E-25 |
| FANCL       | 1753 | 355.5  | 154    | 5.866814 | 2.609458 | -1.16883 | Down | 1.86E-19 | 7.86E-19 |
| SNRPA1      | 1068 | 1710   | 745.5  | 46.54061 | 20.72399 | -1.16719 | Down | 1.04E-86 | 1.15E-85 |
| CORO1B      | 1920 | 3643   | 1596   | 55.20121 | 24.58162 | -1.16712 | Down | #####    | #####    |
| ANKDD1A     | 3126 | 200.5  | 88     | 1.864361 | 0.830237 | -1.16709 | Down | 2.50E-11 | 7.53E-11 |
| NTNG2       | 3113 | 111.5  | 49.5   | 1.050252 | 0.467723 | -1.16701 | Down | 7.52E-07 | 1.87E-06 |
| UTP15       | 3655 | 1057.5 | 460.5  | 8.380876 | 3.732372 | -1.16701 | Down | 2.13E-54 | 1.66E-53 |
| EMG1        | 1072 | 1453   | 632.5  | 39.27568 | 17.49306 | -1.16685 | Down | 3.52E-74 | 3.46E-73 |
| FAM189B     | 3209 | 2629   | 1152   | 23.84385 | 10.62127 | -1.16666 | Down | #####    | #####    |
| DNAAF2      | 2832 | 233    | 102    | 2.391718 | 1.065979 | -1.16587 | Down | 4.46E-13 | 1.55E-12 |
| C14orf80    | 1620 | 333.5  | 146.5  | 5.996899 | 2.673883 | -1.16528 | Down | 5.23E-18 | 2.14E-17 |
| CHRNA5      | 3646 | 305.5  | 134    | 2.438476 | 1.087729 | -1.16466 | Down | 1.47E-16 | 5.79E-16 |
| MRPS14      | 2160 | 946.5  | 412.5  | 12.6988  | 5.666298 | -1.16421 | Down | 8.39E-49 | 6.10E-48 |
| UGT1A3      | 2345 | 298.5  | 130.5  | 3.694284 | 1.64925  | -1.16348 | Down | 2.05E-16 | 8.06E-16 |
| FAM203A     | 2441 | 744.5  | 327.5  | 8.878323 | 3.964932 | -1.16299 | Down | 4.21E-38 | 2.59E-37 |
| ZNF234      | 4482 | 525.5  | 230    | 3.402877 | 1.519992 | -1.16269 | Down | 1.57E-27 | 7.93E-27 |
| RASL11A     | 1543 | 166.5  | 72.5   | 3.123106 | 1.395167 | -1.16254 | Down | 7.22E-10 | 2.04E-09 |

|         |      |        |        |          |          |          |      |          |          |
|---------|------|--------|--------|----------|----------|----------|------|----------|----------|
| SFMBT1  | 4558 | 609.5  | 267.5  | 3.881372 | 1.734019 | -1.16245 | Down | 1.24E-31 | 6.80E-31 |
| HOXB5   | 1830 | 39     | 17     | 0.618901 | 0.276506 | -1.1624  | Down | 0.003202 | 0.006324 |
| GNAI1   | 3318 | 8409   | 3680.5 | 73.55624 | 32.87065 | -1.16205 | Down | 0        | 0        |
| EHMT2   | 3982 | 3149   | 1383   | 22.96876 | 10.26766 | -1.16157 | Down | #####    | #####    |
| HTATSF1 | 3037 | 2548.5 | 1114   | 24.33472 | 10.87906 | -1.16146 | Down | #####    | #####    |
| ARMC4   | 3572 | 160.5  | 70.5   | 1.31054  | 0.586076 | -1.161   | Down | 1.99E-09 | 5.50E-09 |
| ACAA2   | 1952 | 1407   | 617.5  | 20.93434 | 9.36222  | -1.16095 | Down | 8.35E-71 | 7.96E-70 |
| TDRD3   | 2592 | 526    | 230    | 5.886871 | 2.632738 | -1.16094 | Down | 1.12E-27 | 5.69E-27 |
| TNPO2   | 5092 | 3608   | 1583   | 20.57571 | 9.202967 | -1.16077 | Down | #####    | #####    |
| DZIP1   | 7457 | 1499.5 | 657    | 5.836144 | 2.611513 | -1.16013 | Down | 2.17E-75 | 2.17E-74 |
| GALNT9  | 1744 | 304    | 134    | 5.073853 | 2.270718 | -1.15993 | Down | 2.05E-16 | 8.05E-16 |
| GMNN    | 1215 | 1011.5 | 442.5  | 24.12423 | 10.7964  | -1.15993 | Down | 1.14E-51 | 8.62E-51 |
| FUT8    | 4749 | 1120.5 | 491    | 6.839972 | 3.06209  | -1.15947 | Down | 9.28E-57 | 7.49E-56 |
| ICT1    | 888  | 792.5  | 347.5  | 25.87725 | 11.59324 | -1.1584  | Down | 1.09E-40 | 7.04E-40 |
| HEATR1  | 8497 | 3701.5 | 1624.5 | 12.62835 | 5.658265 | -1.15823 | Down | #####    | #####    |
| SPA17   | 955  | 251    | 110    | 7.639226 | 3.422875 | -1.15822 | Down | 5.99E-14 | 2.19E-13 |
| PPIL1   | 1750 | 1598.5 | 703.5  | 26.54203 | 11.89655 | -1.15773 | Down | 1.10E-79 | 1.14E-78 |
| USP18   | 2037 | 336.5  | 148    | 4.802494 | 2.153074 | -1.15739 | Down | 5.23E-18 | 2.14E-17 |
| FANCE   | 2565 | 255    | 112    | 2.885094 | 1.293607 | -1.15722 | Down | 4.29E-14 | 1.57E-13 |
| MRPL12  | 1032 | 3130   | 1379.5 | 88.20155 | 39.56572 | -1.15655 | Down | #####    | #####    |
| ALDH1B1 | 3044 | 1374.5 | 603.5  | 13.09648 | 5.875076 | -1.1565  | Down | 4.38E-69 | 4.10E-68 |
| MUTYH   | 1945 | 342    | 152.5  | 5.138702 | 2.305272 | -1.15647 | Down | 5.19E-18 | 2.12E-17 |
| KBTBD6  | 5228 | 1217   | 536    | 6.766217 | 3.036102 | -1.15613 | Down | 5.47E-61 | 4.65E-60 |
| MMP16   | 6347 | 344    | 151    | 1.569422 | 0.704338 | -1.15589 | Down | 1.63E-18 | 6.75E-18 |
| FH      | 1877 | 4359   | 1913.5 | 67.34094 | 30.23316 | -1.15535 | Down | #####    | #####    |

|          |       |        |        |          |          |          |      |          |          |
|----------|-------|--------|--------|----------|----------|----------|------|----------|----------|
| GYG1     | 2051  | 2145   | 940.5  | 30.28667 | 13.59748 | -1.15534 | Down | #####    | #####    |
| ZFHx4    | 13975 | 2594   | 1154.5 | 5.418745 | 2.433218 | -1.15509 | Down | #####    | #####    |
| CS       | 2997  | 7437   | 3272.5 | 71.94944 | 32.31273 | -1.15488 | Down | 0        | 0        |
| APEX2    | 1991  | 1153   | 509    | 16.83873 | 7.563484 | -1.15466 | Down | 1.28E-57 | 1.04E-56 |
| TBX2     | 3396  | 1855.5 | 819    | 15.87975 | 7.133937 | -1.15442 | Down | 1.42E-91 | 1.63E-90 |
| ATAD2    | 5580  | 3779   | 1660   | 19.62537 | 8.821223 | -1.15367 | Down | #####    | #####    |
| PTTG1    | 728   | 2651   | 1165.5 | 105.6488 | 47.49613 | -1.1534  | Down | #####    | #####    |
| JAKMIP2  | 3357  | 842    | 372    | 7.282123 | 3.274125 | -1.15325 | Down | 1.74E-42 | 1.16E-41 |
| HSPA2    | 2802  | 161    | 72.5   | 1.688769 | 0.759347 | -1.15314 | Down | 3.86E-09 | 1.06E-08 |
| CEP85    | 3961  | 1218   | 538.5  | 8.938437 | 4.020451 | -1.15267 | Down | 1.05E-60 | 8.92E-60 |
| NDE1     | 3222  | 943    | 417    | 8.522718 | 3.835476 | -1.15191 | Down | 2.70E-47 | 1.92E-46 |
| LRRC8B   | 7766  | 265    | 119    | 1.000681 | 0.450381 | -1.15176 | Down | 4.95E-14 | 1.81E-13 |
| ATF1     | 2505  | 866.5  | 381    | 10.02743 | 4.515922 | -1.15086 | Down | 5.44E-44 | 3.70E-43 |
| HSPA4    | 3385  | 10671  | 4701.5 | 91.35505 | 41.14627 | -1.15072 | Down | 0        | 0        |
| TCP1     | 2377  | 7298   | 3213   | 88.97863 | 40.0787  | -1.15062 | Down | 0        | 0        |
| SMARCE1  | 2425  | 4618   | 2035   | 55.17178 | 24.85494 | -1.1504  | Down | #####    | #####    |
| EMILIN2  | 4009  | 108    | 48     | 0.787712 | 0.354866 | -1.15039 | Down | 1.25E-06 | 3.07E-06 |
| GEMIN5   | 5404  | 1871.5 | 827.5  | 10.05551 | 4.530613 | -1.15021 | Down | 3.79E-92 | 4.37E-91 |
| PCYT2    | 3265  | 1566   | 694    | 13.9451  | 6.286552 | -1.14942 | Down | 4.81E-77 | 4.87E-76 |
| NOC2L    | 2817  | 6950.5 | 3076   | 71.73392 | 32.35636 | -1.14861 | Down | 0        | 0        |
| C7orf26  | 1913  | 1430.5 | 631.5  | 21.69634 | 9.790571 | -1.14799 | Down | 4.30E-71 | 4.12E-70 |
| SLC25A10 | 1960  | 935.5  | 413.5  | 13.86599 | 6.257787 | -1.14783 | Down | 5.25E-47 | 3.70E-46 |
| HABP4    | 2708  | 732    | 323    | 7.831687 | 3.534927 | -1.14764 | Down | 3.05E-37 | 1.86E-36 |
| CCT2     | 1962  | 6459.5 | 2848.5 | 95.36593 | 43.06095 | -1.14709 | Down | 0        | 0        |
| BCS1L    | 1454  | 577    | 256.5  | 11.53215 | 5.209115 | -1.14655 | Down | 2.08E-29 | 1.10E-28 |

|         |      |        |        |          |          |          |      |          |          |
|---------|------|--------|--------|----------|----------|----------|------|----------|----------|
| PSMA4   | 1159 | 6559.5 | 2891   | 163.8741 | 74.04044 | -1.1462  | Down | 0        | 0        |
| LRRC8D  | 3782 | 1217.5 | 539.5  | 9.349909 | 4.225008 | -1.146   | Down | 2.39E-60 | 2.01E-59 |
| CDK4    | 1474 | 5124.5 | 2274.5 | 100.9051 | 45.59673 | -1.146   | Down | #####    | #####    |
| C1QTNF2 | 2411 | 202    | 89.5   | 2.423677 | 1.095632 | -1.14543 | Down | 2.11E-11 | 6.40E-11 |
| TEF     | 4349 | 368.5  | 163    | 2.459878 | 1.112007 | -1.14542 | Down | 2.20E-19 | 9.27E-19 |
| PHF15   | 6463 | 6414   | 2848.5 | 28.86236 | 13.04982 | -1.14516 | Down | 0.00E-01 | #####    |
| SRSF4   | 2535 | 3600   | 1593   | 41.23145 | 18.64507 | -1.14495 | Down | #####    | #####    |
| PSMD6   | 1308 | 3431.5 | 1518   | 76.06863 | 34.40158 | -1.14483 | Down | #####    | #####    |
| PPIH    | 813  | 1170   | 515    | 41.54735 | 18.79243 | -1.14461 | Down | 9.12E-59 | 7.60E-58 |
| INCA1   | 1404 | 80.5   | 35.5   | 1.662276 | 0.752215 | -1.14394 | Down | 2.33E-05 | 5.37E-05 |
| PFKFB2  | 3529 | 480    | 213.5  | 3.958879 | 1.791582 | -1.14386 | Down | 1.00E-24 | 4.79E-24 |
| ANKRD23 | 2591 | 87     | 38.5   | 0.969911 | 0.439162 | -1.1431  | Down | 9.85E-06 | 2.31E-05 |
| LYRM2   | 5371 | 1119.5 | 494    | 6.035179 | 2.733361 | -1.14272 | Down | 5.68E-56 | 4.55E-55 |
| DHX35   | 3336 | 669    | 297    | 5.821117 | 2.637839 | -1.14194 | Down | 8.52E-34 | 4.88E-33 |
| CCDC74B | 1471 | 42     | 19     | 0.834691 | 0.378446 | -1.14116 | Down | 0.003156 | 0.006237 |
| ACSL5   | 3399 | 888    | 393.5  | 7.555851 | 3.426093 | -1.14103 | Down | 1.44E-44 | 9.86E-44 |
| C8orf73 | 3251 | 181.5  | 80.5   | 1.618545 | 0.734012 | -1.14082 | Down | 2.62E-10 | 7.53E-10 |
| LARS2   | 4203 | 1289   | 575    | 8.902295 | 4.039115 | -1.14014 | Down | 6.06E-63 | 5.25E-62 |
| CKLF    | 792  | 1470.5 | 652.5  | 53.82436 | 24.42864 | -1.13969 | Down | 2.56E-72 | 2.49E-71 |
| CENPN   | 4659 | 2692   | 1196   | 16.74594 | 7.60325  | -1.13912 | Down | #####    | #####    |
| FAM136A | 1824 | 1892   | 840.5  | 30.04382 | 13.64359 | -1.13884 | Down | 2.26E-92 | 2.61E-91 |
| UBB     | 971  | 25051  | 11130  | 748.3244 | 339.9572 | -1.13831 | Down | 0        | 0        |
| ADAT1   | 3545 | 1404.5 | 626    | 11.50069 | 5.225724 | -1.13802 | Down | 1.84E-68 | 1.71E-67 |
| SNRPE   | 1593 | 3553   | 1574.5 | 64.59194 | 29.35043 | -1.13797 | Down | #####    | #####    |
| HMG3    | 894  | 981.5  | 435.5  | 31.81848 | 14.46011 | -1.13779 | Down | 7.09E-49 | 5.15E-48 |



|          |      |        |        |          |          |          |      |          |          |
|----------|------|--------|--------|----------|----------|----------|------|----------|----------|
| DBF4B    | 1821 | 333    | 149    | 5.305876 | 2.411375 | -1.13774 | Down | 2.30E-17 | 9.25E-17 |
| SH3TC1   | 4273 | 650.5  | 291    | 4.436369 | 2.016278 | -1.13768 | Down | 2.28E-32 | 1.27E-31 |
| HOXC6    | 1681 | 343.5  | 153    | 5.925596 | 2.694226 | -1.13709 | Down | 6.09E-18 | 2.48E-17 |
| HDGFRP3  | 1973 | 1995.5 | 889    | 29.35834 | 13.35541 | -1.13635 | Down | 1.31E-96 | 1.56E-95 |
| IPO4     | 3606 | 1930.5 | 865    | 15.57423 | 7.085851 | -1.13615 | Down | 1.76E-92 | 2.03E-91 |
| C15orf41 | 2595 | 378.5  | 168.5  | 4.225284 | 1.922448 | -1.1361  | Down | 9.54E-20 | 4.06E-19 |
| MRPL22   | 3190 | 1283.5 | 570.5  | 11.65954 | 5.309675 | -1.13482 | Down | 3.78E-63 | 3.28E-62 |
| MRPL1    | 1377 | 654    | 290    | 13.72508 | 6.250308 | -1.13481 | Down | 3.79E-33 | 2.15E-32 |
| AXIN2    | 4241 | 91     | 41     | 0.627281 | 0.285689 | -1.13467 | Down | 1.15E-05 | 2.69E-05 |
| ELOVL6   | 3392 | 879.5  | 393    | 7.518725 | 3.424469 | -1.13461 | Down | 2.72E-43 | 1.84E-42 |
| POR      | 2509 | 4933.5 | 2211   | 57.1624  | 26.0474  | -1.13393 | Down | #####    | #####    |
| RFXAP    | 2825 | 336    | 149.5  | 3.438051 | 1.566843 | -1.13373 | Down | 8.57E-18 | 3.48E-17 |
| ZRANB3   | 3717 | 178.5  | 80     | 1.396487 | 0.637135 | -1.13213 | Down | 7.09E-10 | 2.00E-09 |
| NDUFS2   | 2082 | 3878.5 | 1733   | 54.06111 | 24.66838 | -1.13193 | Down | #####    | #####    |
| PRMT7    | 2193 | 1148   | 514.5  | 15.22665 | 6.948805 | -1.13176 | Down | 7.44E-56 | 5.93E-55 |
| OTUD6B   | 3306 | 939.5  | 418.5  | 8.231835 | 3.758291 | -1.13114 | Down | 1.63E-46 | 1.15E-45 |
| CETN3    | 997  | 743.5  | 331.5  | 21.62633 | 9.875971 | -1.13079 | Down | 4.16E-37 | 2.53E-36 |
| ABHD3    | 2085 | 549.5  | 245    | 7.643528 | 3.491307 | -1.13047 | Down | 9.31E-28 | 4.72E-27 |
| STMN3    | 2255 | 2751   | 1237   | 35.45564 | 16.19508 | -1.13046 | Down | #####    | #####    |
| C15orf63 | 1295 | 1936   | 865.5  | 43.36894 | 19.81342 | -1.13018 | Down | 2.51E-93 | 2.93E-92 |
| ABHD16A  | 2146 | 2733.5 | 1227.5 | 37.03737 | 16.92432 | -1.12988 | Down | #####    | #####    |
| G2E3     | 5581 | 961    | 429.5  | 4.984863 | 2.277907 | -1.12985 | Down | 2.62E-47 | 1.86E-46 |
| PXMP4    | 5727 | 937    | 419.5  | 4.745977 | 2.169208 | -1.12954 | Down | 5.08E-46 | 3.54E-45 |
| C2orf47  | 1525 | 494.5  | 221    | 9.421463 | 4.307854 | -1.12898 | Down | 5.06E-25 | 2.43E-24 |
| ATG4C    | 2690 | 516.5  | 231    | 5.571661 | 2.548109 | -1.12868 | Down | 4.94E-26 | 2.42E-25 |

|         |      |         |        |          |          |          |      |          |          |
|---------|------|---------|--------|----------|----------|----------|------|----------|----------|
| TIMM50  | 2572 | 2165.5  | 971.5  | 24.45492 | 11.18418 | -1.12866 | Down | #####    | #####    |
| SEC16B  | 4024 | 225.5   | 101.5  | 1.62435  | 0.742883 | -1.12866 | Down | 3.86E-12 | 1.25E-11 |
| LRRC20  | 2925 | 353     | 158    | 3.498488 | 1.600017 | -1.12864 | Down | 2.63E-18 | 1.08E-17 |
| AAAS    | 1854 | 1651    | 741    | 25.84385 | 11.82118 | -1.12845 | Down | 3.65E-79 | 3.76E-78 |
| EIF2AK2 | 2696 | 1947.5  | 871    | 20.94461 | 9.582047 | -1.12817 | Down | 1.28E-93 | 1.50E-92 |
| NUP93   | 2876 | 3722    | 1671   | 37.54837 | 17.18594 | -1.12752 | Down | #####    | #####    |
| C3orf26 | 1230 | 849     | 379    | 19.98153 | 9.145958 | -1.12746 | Down | 5.38E-42 | 3.55E-41 |
| BCCIP   | 1261 | 2511.5  | 1122   | 57.72035 | 26.42044 | -1.12743 | Down | #####    | #####    |
| SNRNP70 | 1940 | 6526.5  | 2929   | 97.7471  | 44.7498  | -1.12717 | Down | #####    | #####    |
| THOC4   | 1113 | 3220    | 1445   | 84.06418 | 38.49579 | -1.12679 | Down | #####    | #####    |
| PAXIP1  | 3723 | 1103.5  | 495.5  | 8.589138 | 3.933607 | -1.12666 | Down | 1.70E-53 | 1.32E-52 |
| TTL12   | 3421 | 2811.5  | 1267   | 23.89542 | 10.94538 | -1.12641 | Down | #####    | #####    |
| LRRC34  | 1892 | 89.5    | 40.5   | 1.367566 | 0.626688 | -1.12579 | Down | 1.37E-05 | 3.19E-05 |
| MYBBP1A | 4122 | 3559.5  | 1599   | 25.04428 | 11.48142 | -1.12518 | Down | #####    | #####    |
| ANP32E  | 3347 | 6110    | 2737.5 | 52.95042 | 24.27999 | -1.12487 | Down | #####    | #####    |
| DIS3L   | 3714 | 1240.5  | 559.5  | 9.714098 | 4.456574 | -1.12415 | Down | 2.14E-59 | 1.79E-58 |
| SUMO2   | 994  | 7370.5  | 3299   | 214.5869 | 98.4482  | -1.12413 | Down | 0        | 0        |
| CCDC138 | 2196 | 286     | 129    | 3.789138 | 1.739115 | -1.12352 | Down | 6.58E-15 | 2.47E-14 |
| CTU1    | 2107 | 182.5   | 82     | 2.510045 | 1.152117 | -1.12343 | Down | 5.04E-10 | 1.43E-09 |
| MECOM   | 5195 | 1182    | 534    | 6.614008 | 3.038053 | -1.12238 | Down | 1.83E-56 | 1.47E-55 |
| FAM22A  | 3308 | 95      | 43     | 0.834844 | 0.383536 | -1.12214 | Down | 8.12E-06 | 1.92E-05 |
| MAD2L1  | 1453 | 2157.5  | 968.5  | 43.02411 | 19.77125 | -1.12174 | Down | #####    | #####    |
| SLC16A9 | 4001 | 780     | 352    | 5.658085 | 2.600576 | -1.12148 | Down | 6.31E-38 | 3.88E-37 |
| CTCF    | 3946 | 3120.5  | 1401   | 22.91644 | 10.53426 | -1.12129 | Down | #####    | #####    |
| SCRN1   | 5286 | 13816.5 | 6224.5 | 75.86793 | 34.88145 | -1.12103 | Down | 0        | 0        |

|          |      |         |        |          |          |          |      |          |          |
|----------|------|---------|--------|----------|----------|----------|------|----------|----------|
| DEPDC4   | 1155 | 47      | 21.5   | 1.193869 | 0.548927 | -1.12096 | Down | 0.00155  | 0.003145 |
| RPUSD3   | 1244 | 611     | 275.5  | 14.24205 | 6.549778 | -1.12064 | Down | 3.21E-30 | 1.71E-29 |
| VRK2     | 1944 | 59.5    | 27     | 0.894177 | 0.41128  | -1.12044 | Down | 0.000524 | 0.001105 |
| LPA      | 6489 | 50      | 24     | 0.232483 | 0.106973 | -1.11988 | Down | 0.002444 | 0.004875 |
| C6orf136 | 1441 | 459     | 207    | 9.234199 | 4.249162 | -1.11981 | Down | 5.15E-23 | 2.36E-22 |
| DUSP19   | 5226 | 167     | 76     | 0.933565 | 0.429656 | -1.11957 | Down | 3.75E-09 | 1.03E-08 |
| TMEM201  | 3857 | 317     | 144    | 2.388629 | 1.0995   | -1.11933 | Down | 3.75E-16 | 1.47E-15 |
| HNRNPA0  | 2983 | 6496.5  | 2933.5 | 63.22189 | 29.111   | -1.11886 | Down | #####    | #####    |
| HNRNPU   | 6846 | 24424.5 | 10998  | 103.437  | 47.64257 | -1.11843 | Down | 0        | 0        |
| CNKSR3   | 3277 | 397     | 180    | 3.531577 | 1.627129 | -1.11798 | Down | 6.45E-20 | 2.76E-19 |
| TACO1    | 1479 | 888.5   | 401.5  | 17.48194 | 8.054887 | -1.11793 | Down | 6.88E-43 | 4.61E-42 |
| IFIT2    | 3505 | 536.5   | 242.5  | 4.446245 | 2.048873 | -1.11776 | Down | 1.49E-26 | 7.40E-26 |
| NOD1     | 4506 | 330     | 150    | 2.136103 | 0.984417 | -1.11764 | Down | 9.83E-17 | 3.89E-16 |
| TPK1     | 2449 | 46      | 21     | 0.546967 | 0.252104 | -1.11744 | Down | 0.002186 | 0.00438  |
| SMAD6    | 1293 | 1409.5  | 635.5  | 31.6002  | 14.56969 | -1.11696 | Down | 2.76E-67 | 2.54E-66 |
| RTTN     | 7109 | 503     | 227    | 2.053803 | 0.947108 | -1.1167  | Down | 4.89E-25 | 2.35E-24 |
| SF3B3    | 9736 | 10389.5 | 4688.5 | 30.89806 | 14.25162 | -1.11639 | Down | 0        | 0        |
| TAF4     | 4647 | 1340    | 606    | 8.375452 | 3.864161 | -1.11601 | Down | 1.21E-63 | 1.06E-62 |
| MRPL38   | 1614 | 1682    | 763    | 30.31838 | 13.98829 | -1.11597 | Down | 6.06E-79 | 6.24E-78 |
| GIN1     | 3549 | 310     | 139.5  | 2.529536 | 1.167323 | -1.11567 | Down | 3.30E-16 | 1.29E-15 |
| LPCAT4   | 1908 | 614.5   | 279    | 9.38082  | 4.330584 | -1.11515 | Down | 8.20E-30 | 4.34E-29 |
| MRM1     | 1851 | 304.5   | 138    | 4.775696 | 2.204665 | -1.11515 | Down | 1.43E-15 | 5.50E-15 |
| UTS2D    | 2408 | 123.5   | 56     | 1.49117  | 0.688678 | -1.11454 | Down | 4.37E-07 | 1.10E-06 |
| CCDC111  | 2295 | 310     | 140.5  | 3.921687 | 1.811208 | -1.11452 | Down | 5.34E-16 | 2.08E-15 |
| FUNDC1   | 1170 | 812.5   | 367    | 20.17338 | 9.317112 | -1.1145  | Down | 2.68E-39 | 1.69E-38 |

|          |      |         |        |          |          |          |      |          |          |
|----------|------|---------|--------|----------|----------|----------|------|----------|----------|
| C14orf21 | 2047 | 580.5   | 263    | 8.234631 | 3.804154 | -1.11413 | Down | 2.30E-28 | 1.18E-27 |
| RPIA     | 1834 | 686.5   | 311.5  | 10.88931 | 5.030736 | -1.11407 | Down | 2.90E-33 | 1.65E-32 |
| DHX9     | 4543 | 9426.5  | 4255.5 | 60.05379 | 27.74988 | -1.11377 | Down | 0        | 0        |
| WBSCR16  | 2386 | 3594    | 1628   | 43.76345 | 20.22258 | -1.11376 | Down | #####    | #####    |
| EXOSC5   | 1006 | 340     | 155.5  | 9.848855 | 4.551802 | -1.11352 | Down | 4.21E-17 | 1.69E-16 |
| TUBGCP3  | 3908 | 1883.5  | 854    | 13.98114 | 6.462726 | -1.11327 | Down | 3.42E-88 | 3.83E-87 |
| ATAD5    | 6245 | 466     | 211.5  | 2.168655 | 1.002458 | -1.11326 | Down | 3.63E-23 | 1.67E-22 |
| PSMB2    | 4235 | 14117.5 | 6394   | 96.7129  | 44.71231 | -1.11304 | Down | 0        | 0        |
| NUDT16L1 | 1437 | 1004    | 456    | 20.30987 | 9.38974  | -1.11302 | Down | 9.98E-48 | 7.15E-47 |
| EXOG     | 3146 | 535     | 242    | 4.922434 | 2.276714 | -1.11242 | Down | 2.06E-26 | 1.02E-25 |
| BIVM     | 3210 | 1169    | 528.5  | 10.55122 | 4.881662 | -1.11197 | Down | 6.89E-56 | 5.50E-55 |
| SLC38A6  | 1766 | 739     | 333    | 12.08087 | 5.589534 | -1.11192 | Down | 4.00E-36 | 2.39E-35 |
| STRA13   | 863  | 1691    | 769    | 56.99058 | 26.37306 | -1.11166 | Down | 5.79E-79 | 5.96E-78 |
| ANKRD30B | 4617 | 227     | 102.5  | 1.426036 | 0.659934 | -1.11162 | Down | 3.26E-12 | 1.06E-11 |
| HEXIM1   | 4785 | 2080.5  | 943.5  | 12.60782 | 5.835967 | -1.11128 | Down | 2.71E-97 | 3.25E-96 |
| SLC9A3R1 | 2013 | 1312.5  | 597    | 18.94981 | 8.771881 | -1.11123 | Down | 1.34E-61 | 1.14E-60 |
| NUSAP1   | 2434 | 3225.5  | 1459   | 38.42692 | 17.78822 | -1.11119 | Down | #####    | #####    |
| CCBL1    | 1925 | 159     | 72     | 2.399331 | 1.110795 | -1.11104 | Down | 7.46E-09 | 2.02E-08 |
| DNAJB1   | 2233 | 4004.5  | 1815.5 | 52.01385 | 24.08101 | -1.111   | Down | #####    | #####    |
| HOXA1    | 2561 | 277     | 124.5  | 3.121402 | 1.445182 | -1.11094 | Down | 1.10E-14 | 4.13E-14 |
| EMR1     | 3150 | 464     | 211.5  | 4.293008 | 1.988777 | -1.11011 | Down | 6.91E-23 | 3.16E-22 |
| PRR22    | 1407 | 76      | 34.5   | 1.563718 | 0.724459 | -1.11    | Down | 5.49E-05 | 0.000124 |
| CHCHD1   | 844  | 1185    | 537.5  | 40.72831 | 18.87069 | -1.10988 | Down | 2.90E-56 | 2.33E-55 |
| PPA1     | 1316 | 5084    | 2298   | 111.838  | 51.83343 | -1.10946 | Down | #####    | #####    |
| ATN1     | 4367 | 10331.5 | 4706.5 | 68.78488 | 31.88297 | -1.10931 | Down | 0        | 0        |

|          |       |         |        |          |          |          |      |          |          |
|----------|-------|---------|--------|----------|----------|----------|------|----------|----------|
| KNTC1    | 6965  | 1460.5  | 660.5  | 6.056302 | 2.809905 | -1.10792 | Down | 3.08E-69 | 2.88E-68 |
| RIPK2    | 2588  | 1095.5  | 499.5  | 12.2799  | 5.698464 | -1.10765 | Down | 1.49E-51 | 1.12E-50 |
| PPP1R3D  | 3481  | 593     | 268.5  | 4.943957 | 2.294655 | -1.10739 | Down | 3.78E-29 | 1.98E-28 |
| ELMO1    | 3590  | 436.5   | 199.5  | 3.543044 | 1.64476  | -1.10711 | Down | 1.89E-21 | 8.33E-21 |
| DOLK     | 2267  | 1072.5  | 488.5  | 13.7354  | 6.376374 | -1.10709 | Down | 1.30E-50 | 9.66E-50 |
| LYPD5    | 2518  | 158     | 72.5   | 1.826834 | 0.848119 | -1.10701 | Down | 1.03E-08 | 2.78E-08 |
| PPARGC1B | 10642 | 376     | 171.5  | 1.027853 | 0.477404 | -1.10635 | Down | 7.76E-19 | 3.24E-18 |
| C4orf27  | 1233  | 634     | 287.5  | 14.88997 | 6.918144 | -1.10588 | Down | 5.91E-31 | 3.20E-30 |
| SATB2    | 5326  | 981.5   | 449    | 5.359445 | 2.49394  | -1.10366 | Down | 5.70E-46 | 3.97E-45 |
| TWISTNB  | 3892  | 2169.5  | 987.5  | 16.14533 | 7.513567 | -1.10355 | Down | #####    | 1.53E-99 |
| CENPK    | 1781  | 892.5   | 405.5  | 14.52165 | 6.759624 | -1.10319 | Down | 1.27E-42 | 8.47E-42 |
| HNRNPL   | 2129  | 9986.5  | 4547   | 136.0395 | 63.32522 | -1.10317 | Down | 0        | 0        |
| NDUFV2   | 937   | 5722    | 2601.5 | 176.8817 | 82.35079 | -1.10293 | Down | #####    | #####    |
| PDLIM3   | 2853  | 351.5   | 161.5  | 3.597033 | 1.674875 | -1.10275 | Down | 2.10E-17 | 8.46E-17 |
| KATNAL2  | 2850  | 129     | 59     | 1.317015 | 0.613322 | -1.10256 | Down | 2.60E-07 | 6.59E-07 |
| PAIP1    | 2559  | 3722.5  | 1694   | 42.16169 | 19.63441 | -1.10255 | Down | #####    | #####    |
| HMG1     | 1313  | 7166.5  | 3262   | 158.139  | 73.64434 | -1.10255 | Down | 0        | 0        |
| PIPOX    | 2412  | 86.5    | 42     | 1.081296 | 0.503633 | -1.10232 | Down | 9.21E-05 | 0.000204 |
| SRGAP2   | 6303  | 3946.5  | 1802.5 | 18.16156 | 8.460991 | -1.10199 | Down | #####    | #####    |
| SMARCD1  | 3308  | 1914.5  | 875.5  | 16.81546 | 7.834374 | -1.1019  | Down | 3.38E-88 | 3.79E-87 |
| TAF1B    | 2306  | 557.5   | 253.5  | 6.993933 | 3.259286 | -1.10155 | Down | 3.24E-27 | 1.63E-26 |
| GPC2     | 2666  | 105.5   | 47.5   | 1.137248 | 0.530085 | -1.10125 | Down | 2.08E-06 | 5.05E-06 |
| HNRNPD   | 2053  | 10541.5 | 4803   | 148.7705 | 69.36039 | -1.1009  | Down | 0        | 0        |
| LDHB     | 1317  | 16302.5 | 7429.5 | 358.8376 | 167.318  | -1.10074 | Down | 0        | 0        |
| GPR39    | 2821  | 1282    | 588    | 13.21578 | 6.163838 | -1.10036 | Down | 2.75E-59 | 2.29E-58 |

|          |      |        |        |          |          |          |      |          |          |
|----------|------|--------|--------|----------|----------|----------|------|----------|----------|
| ABCD4    | 3157 | 292.5  | 135    | 2.701927 | 1.260385 | -1.10012 | Down | 1.63E-14 | 6.06E-14 |
| NARS2    | 2513 | 595.5  | 273    | 6.879785 | 3.210973 | -1.09935 | Down | 2.11E-28 | 1.08E-27 |
| TSHZ1    | 4982 | 1012   | 463.5  | 5.905057 | 2.756069 | -1.09934 | Down | 2.09E-47 | 1.49E-46 |
| ZNF593   | 653  | 829    | 379    | 36.92462 | 17.23403 | -1.09932 | Down | 3.36E-39 | 2.11E-38 |
| PLEKHF1  | 1774 | 317.5  | 146    | 5.214769 | 2.43442  | -1.09903 | Down | 9.62E-16 | 3.72E-15 |
| NOL12    | 2840 | 596    | 272.5  | 6.081244 | 2.839191 | -1.09889 | Down | 9.59E-29 | 4.97E-28 |
| KIAA1683 | 4421 | 79     | 38     | 0.533737 | 0.24925  | -1.09854 | Down | 0.000138 | 0.000303 |
| MKL2     | 8680 | 1751.5 | 801    | 5.851995 | 2.73336  | -1.09825 | Down | 9.69E-81 | 1.02E-79 |
| MYO18A   | 7591 | 2653.5 | 1217.5 | 10.15273 | 4.742214 | -1.09824 | Down | #####    | #####    |
| IRX1     | 1858 | 125.5  | 57.5   | 1.961404 | 0.916273 | -1.09804 | Down | 3.67E-07 | 9.25E-07 |
| CASP9    | 2165 | 172    | 78.5   | 2.299959 | 1.074494 | -1.09795 | Down | 1.92E-09 | 5.32E-09 |
| AKAP1    | 4048 | 1017.5 | 466.5  | 7.311145 | 3.416598 | -1.09754 | Down | 1.73E-47 | 1.24E-46 |
| TMSB15B  | 683  | 135    | 61.5   | 5.70729  | 2.667213 | -1.09747 | Down | 9.54E-08 | 2.47E-07 |
| FAM109B  | 2369 | 224    | 102.5  | 2.748234 | 1.284347 | -1.09747 | Down | 8.65E-12 | 2.70E-11 |
| TPX2     | 3685 | 8435   | 3855   | 66.37184 | 31.03515 | -1.09667 | Down | 0        | 0        |
| TACC2    | 3916 | 600    | 278.5  | 4.471053 | 2.090952 | -1.09645 | Down | 4.39E-28 | 2.25E-27 |
| CXCL12   | 524  | 56.5   | 27     | 3.192502 | 1.493036 | -1.09644 | Down | 0.001404 | 0.002861 |
| FHAD1    | 5090 | 150    | 70     | 0.861193 | 0.402824 | -1.09619 | Down | 5.30E-08 | 1.39E-07 |
| KPNB1    | 4205 | 15630  | 7146   | 107.7259 | 50.40323 | -1.09578 | Down | 0        | 0        |
| CENPO    | 4102 | 1880   | 863    | 13.3154  | 6.231005 | -1.09556 | Down | 6.01E-86 | 6.61E-85 |
| GPR125   | 4576 | 1310   | 600.5  | 8.292003 | 3.880594 | -1.09544 | Down | 1.03E-60 | 8.71E-60 |
| STEAP2   | 6708 | 1407.5 | 643.5  | 6.075927 | 2.844261 | -1.09505 | Down | 2.29E-65 | 2.06E-64 |
| IKBKG    | 1982 | 2454.5 | 1128.5 | 35.99137 | 16.85294 | -1.09465 | Down | #####    | #####    |
| BAZ1A    | 5935 | 2375   | 1092   | 11.63567 | 5.448979 | -1.0945  | Down | #####    | #####    |
| TTL2     | 2877 | 47     | 23     | 0.493649 | 0.231223 | -1.0942  | Down | 0.004065 | 0.007944 |

|          |      |        |        |          |          |          |      |          |          |
|----------|------|--------|--------|----------|----------|----------|------|----------|----------|
| GATSL2   | 990  | 89     | 41     | 2.615695 | 1.225292 | -1.09407 | Down | 2.23E-05 | 5.14E-05 |
| SDSL     | 1414 | 206.5  | 94.5   | 4.221454 | 1.977514 | -1.09405 | Down | 6.48E-11 | 1.91E-10 |
| CHEK2    | 1991 | 229.5  | 105    | 3.341946 | 1.565582 | -1.09399 | Down | 7.15E-12 | 2.25E-11 |
| SIPA1L2  | 6501 | 3037.5 | 1408   | 13.6376  | 6.389813 | -1.09374 | Down | #####    | #####    |
| RDH14    | 1602 | 196    | 90     | 3.553783 | 1.665989 | -1.09298 | Down | 2.45E-10 | 7.04E-10 |
| POLR3GL  | 1191 | 1030.5 | 472.5  | 25.09531 | 11.76473 | -1.09295 | Down | 4.59E-48 | 3.31E-47 |
| FANCM    | 7144 | 372    | 171    | 1.511964 | 0.708936 | -1.0927  | Down | 2.79E-18 | 1.15E-17 |
| C20orf96 | 1615 | 282    | 130.5  | 5.081    | 2.383209 | -1.09221 | Down | 3.83E-14 | 1.41E-13 |
| FPGT     | 3682 | 776.5  | 356.5  | 6.110527 | 2.86687  | -1.09182 | Down | 1.49E-36 | 9.00E-36 |
| WDYHV1   | 1348 | 406    | 187    | 8.76236  | 4.11213  | -1.09143 | Down | 9.77E-20 | 4.16E-19 |
| URB2     | 5613 | 1538   | 711    | 7.97196  | 3.741461 | -1.09133 | Down | 1.20E-69 | 1.13E-68 |
| ETHE1    | 978  | 771    | 354    | 22.86682 | 10.73251 | -1.09127 | Down | 2.88E-36 | 1.73E-35 |
| PION     | 3265 | 396    | 182    | 3.521947 | 1.654334 | -1.09012 | Down | 2.28E-19 | 9.61E-19 |
| KIAA1644 | 6741 | 2562   | 1180   | 11.03111 | 5.182361 | -1.0899  | Down | #####    | #####    |
| ARHGAP26 | 8876 | 705    | 327.5  | 2.315309 | 1.087901 | -1.08966 | Down | 1.21E-32 | 6.80E-32 |
| INPP1    | 2179 | 675    | 311    | 8.978353 | 4.22003  | -1.0892  | Down | 9.67E-32 | 5.32E-31 |
| MOCOS    | 2747 | 347.5  | 161    | 3.678884 | 1.730071 | -1.08844 | Down | 7.47E-17 | 2.96E-16 |
| DECR1    | 1251 | 2383.5 | 1096.5 | 55.20092 | 25.96312 | -1.08823 | Down | #####    | #####    |
| LIN9     | 3340 | 479.5  | 221.5  | 4.167382 | 1.960096 | -1.08822 | Down | 6.26E-23 | 2.87E-22 |
| CCDC106  | 1993 | 151    | 70.5   | 2.222656 | 1.04574  | -1.08776 | Down | 3.85E-08 | 1.01E-07 |
| GLI3     | 8228 | 631.5  | 292    | 2.232602 | 1.050965 | -1.08701 | Down | 1.60E-29 | 8.42E-29 |
| GTF2H2C  | 2106 | 1162   | 534.5  | 15.98408 | 7.52685  | -1.08652 | Down | 1.08E-53 | 8.34E-53 |
| AGK      | 2925 | 2323   | 1073   | 23.06677 | 10.86378 | -1.08629 | Down | #####    | #####    |
| C17orf97 | 1839 | 245    | 114    | 3.874731 | 1.825633 | -1.0857  | Down | 2.90E-12 | 9.47E-12 |
| VAR52    | 3629 | 1158.5 | 536    | 9.275911 | 4.371889 | -1.08523 | Down | 9.55E-53 | 7.31E-52 |

|             |       |         |        |          |          |          |      |          |          |
|-------------|-------|---------|--------|----------|----------|----------|------|----------|----------|
| MAD2L2      | 1196  | 270.5   | 125    | 6.564739 | 3.095894 | -1.08438 | Down | 1.70E-13 | 6.06E-13 |
| RTKN2       | 6659  | 203.5   | 94     | 0.882615 | 0.416237 | -1.08438 | Down | 1.70E-10 | 4.91E-10 |
| NGDN        | 1142  | 483     | 222.5  | 12.23471 | 5.769914 | -1.08436 | Down | 2.80E-23 | 1.30E-22 |
| MAP9        | 7333  | 2488    | 1147.5 | 9.843442 | 4.643215 | -1.08404 | Down | #####    | #####    |
| GATSL3      | 1644  | 220     | 102    | 3.891562 | 1.836285 | -1.08356 | Down | 3.12E-11 | 9.34E-11 |
| HELLS       | 3165  | 462     | 212.5  | 4.220575 | 1.992334 | -1.08298 | Down | 2.09E-22 | 9.48E-22 |
| C9orf37     | 1468  | 608     | 281    | 12.0126  | 5.673347 | -1.08228 | Down | 1.41E-28 | 7.28E-28 |
| LRWD1       | 2220  | 1809    | 841    | 23.71512 | 11.20059 | -1.08223 | Down | 1.17E-80 | 1.23E-79 |
| LIFR        | 10107 | 4462    | 2061   | 12.797   | 6.046061 | -1.08174 | Down | #####    | #####    |
| HSPE1-PHOCN | 4279  | 1116    | 513.5  | 7.540181 | 3.563724 | -1.08121 | Down | 1.31E-51 | 9.85E-51 |
| BYSL        | 2005  | 1185.5  | 550.5  | 17.18121 | 8.120393 | -1.08121 | Down | 1.23E-53 | 9.52E-53 |
| PTMA        | 1223  | 24296.5 | 11229  | 576.214  | 272.3519 | -1.08113 | Down | 0        | 0        |
| ZNF680      | 3050  | 517.5   | 240.5  | 4.935592 | 2.333212 | -1.08091 | Down | 2.49E-24 | 1.18E-23 |
| EWSR1       | 2676  | 7061    | 3272   | 76.59631 | 36.22085 | -1.08045 | Down | 0        | 0        |
| EIF2B5      | 2898  | 1447    | 670.5  | 14.49244 | 6.853819 | -1.08032 | Down | 2.03E-65 | 1.82E-64 |
| SAE1        | 2393  | 5505    | 2547.5 | 66.77401 | 31.5919  | -1.07973 | Down | #####    | #####    |
| MSH2        | 3145  | 1910.5  | 885    | 17.63796 | 8.345535 | -1.07961 | Down | 1.21E-85 | 1.33E-84 |
| ILF3        | 3757  | 13801   | 6405   | 106.5398 | 50.44189 | -1.0787  | Down | 0        | 0        |
| PSMD11      | 1598  | 5063    | 2345   | 91.92017 | 43.53031 | -1.07836 | Down | #####    | #####    |
| LYRM5       | 1149  | 552     | 256    | 13.9019  | 6.584885 | -1.07805 | Down | 6.43E-26 | 3.14E-25 |
| SRRT        | 3020  | 6212.5  | 2883   | 59.66075 | 28.26169 | -1.07793 | Down | #####    | #####    |
| ZHX1        | 5139  | 3250    | 1503.5 | 18.30703 | 8.675403 | -1.0774  | Down | #####    | #####    |
| SLC26A11    | 2930  | 334     | 156    | 3.323198 | 1.575101 | -1.07713 | Down | 4.51E-16 | 1.76E-15 |
| EIF2B4      | 1763  | 944.5   | 439.5  | 15.59569 | 7.392516 | -1.07701 | Down | 6.53E-43 | 4.38E-42 |
| RPUSD2      | 1839  | 421     | 196    | 6.661233 | 3.158104 | -1.07673 | Down | 5.45E-20 | 2.34E-19 |



|          |      |        |        |          |          |          |      |          |          |
|----------|------|--------|--------|----------|----------|----------|------|----------|----------|
| TARBP2   | 1488 | 1388   | 646.5  | 27.0795  | 12.84098 | -1.07645 | Down | 3.63E-62 | 3.12E-61 |
| TSPAN12  | 2579 | 479    | 223.5  | 5.385878 | 2.554796 | -1.07597 | Down | 1.57E-22 | 7.13E-22 |
| MRPL20   | 749  | 2457.5 | 1141.5 | 95.19117 | 45.15838 | -1.07583 | Down | #####    | #####    |
| BCL9     | 6278 | 1238   | 579    | 5.740028 | 2.723564 | -1.07556 | Down | 4.36E-55 | 3.44E-54 |
| TPRKB    | 752  | 695.5  | 323    | 26.82728 | 12.73235 | -1.0752  | Down | 4.47E-32 | 2.48E-31 |
| CRISPLD2 | 4607 | 206    | 96     | 1.307082 | 0.620714 | -1.07435 | Down | 1.65E-10 | 4.79E-10 |
| RPP30    | 2371 | 1113.5 | 516    | 13.5935  | 6.455694 | -1.07427 | Down | 1.34E-50 | 9.96E-50 |
| SAP30L   | 6120 | 744    | 345.5  | 3.520894 | 1.672587 | -1.07386 | Down | 2.25E-34 | 1.30E-33 |
| PPP5C    | 2166 | 2624   | 1223.5 | 35.21279 | 16.73281 | -1.07342 | Down | #####    | #####    |
| LRIG3    | 3662 | 898    | 419    | 7.11859  | 3.382806 | -1.07337 | Down | 1.25E-40 | 8.07E-40 |
| HSF2     | 2643 | 353.5  | 165    | 3.880521 | 1.844358 | -1.07313 | Down | 7.08E-17 | 2.81E-16 |
| CENPB    | 2856 | 8310.5 | 3881   | 84.58162 | 40.20516 | -1.07296 | Down | 0        | 0        |
| PHF11    | 1471 | 893.5  | 414    | 17.583   | 8.36004  | -1.0726  | Down | 6.11E-41 | 3.96E-40 |
| NUCKS1   | 6471 | 27090  | 12581  | 121.3677 | 57.70689 | -1.07257 | Down | 0        | 0        |
| ERCC3    | 2751 | 1610   | 751.5  | 17.00848 | 8.088567 | -1.0723  | Down | 1.72E-71 | 1.66E-70 |
| MDFIC    | 5312 | 3719   | 1731.5 | 20.30789 | 9.659348 | -1.07204 | Down | #####    | #####    |
| NICN1    | 3227 | 521.5  | 244.5  | 4.700199 | 2.235986 | -1.07181 | Down | 4.42E-24 | 2.08E-23 |
| BRAT1    | 3013 | 3607.5 | 1691.5 | 34.86258 | 16.58632 | -1.07169 | Down | #####    | #####    |
| AZI1     | 3630 | 823    | 384    | 6.589255 | 3.13553  | -1.07141 | Down | 2.23E-37 | 1.36E-36 |
| RAD54B   | 3074 | 826.5  | 385    | 7.791208 | 3.708343 | -1.07107 | Down | 1.38E-37 | 8.46E-37 |
| PDS5A    | 2745 | 5370.5 | 2498   | 56.70443 | 26.9934  | -1.07085 | Down | #####    | #####    |
| RSAD1    | 2499 | 1282   | 599    | 14.89339 | 7.097972 | -1.06919 | Down | 4.27E-57 | 3.46E-56 |
| AGBL3    | 3542 | 95     | 46     | 0.790381 | 0.376835 | -1.06862 | Down | 3.29E-05 | 7.52E-05 |
| COPG2    | 3154 | 2165   | 1009   | 19.89714 | 9.488106 | -1.06837 | Down | 1.14E-95 | 1.36E-94 |
| SCRN2    | 1582 | 1298   | 606    | 23.80652 | 11.35293 | -1.06829 | Down | 7.03E-58 | 5.76E-57 |

|          |       |        |        |          |          |          |      |          |          |
|----------|-------|--------|--------|----------|----------|----------|------|----------|----------|
| C19orf57 | 2420  | 49     | 23     | 0.590033 | 0.281394 | -1.0682  | Down | 0.002118 | 0.004249 |
| GABPB1   | 1622  | 1181   | 551    | 21.09916 | 10.06353 | -1.06805 | Down | 6.77E-53 | 5.19E-52 |
| SFPQ     | 3073  | 10520  | 4906   | 99.26382 | 47.35199 | -1.06784 | Down | 0        | 0        |
| ATG3     | 1372  | 1717.5 | 799.5  | 36.26061 | 17.30176 | -1.06748 | Down | 1.70E-76 | 1.71E-75 |
| KLF9     | 5208  | 4281.5 | 2003   | 23.86741 | 11.39068 | -1.06719 | Down | #####    | #####    |
| IQSEC2   | 5248  | 1916   | 898    | 10.5973  | 5.058058 | -1.06704 | Down | 6.85E-84 | 7.38E-83 |
| PPARG    | 1892  | 354    | 167    | 5.441556 | 2.597563 | -1.06686 | Down | 1.28E-16 | 5.07E-16 |
| SNRPF    | 806   | 2010.5 | 938    | 72.27604 | 34.52465 | -1.06589 | Down | 1.04E-88 | 1.17E-87 |
| WDR36    | 6611  | 5421   | 2531   | 23.76922 | 11.35888 | -1.06527 | Down | #####    | #####    |
| UCK2     | 4940  | 1430.5 | 670.5  | 8.415083 | 4.022895 | -1.06474 | Down | 4.06E-63 | 3.52E-62 |
| THAP7    | 1097  | 685.5  | 323.5  | 18.20999 | 8.706706 | -1.06453 | Down | 1.00E-30 | 5.40E-30 |
| RNF43    | 4573  | 330    | 155    | 2.098533 | 1.003496 | -1.06435 | Down | 1.00E-15 | 3.86E-15 |
| GFM1     | 3468  | 2642.5 | 1234.5 | 22.07753 | 10.55861 | -1.06416 | Down | #####    | #####    |
| MRPS36   | 1329  | 798.5  | 371.5  | 17.37161 | 8.309513 | -1.0639  | Down | 1.48E-36 | 8.89E-36 |
| TAP2     | 5679  | 7669   | 3606   | 39.2337  | 18.77661 | -1.06316 | Down | 0        | 0        |
| DCPS     | 1508  | 960    | 451    | 18.475   | 8.844632 | -1.0627  | Down | 1.03E-42 | 6.89E-42 |
| PAK1IP1  | 1511  | 1004   | 470    | 19.27952 | 9.2315   | -1.06243 | Down | 6.42E-45 | 4.42E-44 |
| RNF31    | 3571  | 1021.5 | 482    | 8.332833 | 3.990897 | -1.06209 | Down | 7.31E-45 | 5.03E-44 |
| MB21D1   | 1802  | 345    | 161    | 5.561138 | 2.663565 | -1.06202 | Down | 1.40E-16 | 5.54E-16 |
| SAMHD1   | 3189  | 2973   | 1395.5 | 27.08819 | 12.97803 | -1.06159 | Down | #####    | #####    |
| TARS2    | 2390  | 934    | 440    | 11.35999 | 5.444217 | -1.06116 | Down | 2.29E-41 | 1.50E-40 |
| C4orf33  | 1873  | 316    | 148    | 4.892881 | 2.345418 | -1.06084 | Down | 3.32E-15 | 1.26E-14 |
| SESTD1   | 10448 | 659    | 308.5  | 1.829954 | 0.877442 | -1.06043 | Down | 3.71E-30 | 1.98E-29 |
| CAB39L   | 3691  | 497.5  | 233    | 3.911293 | 1.875448 | -1.06041 | Down | 5.36E-23 | 2.46E-22 |
| SLC9A5   | 3745  | 516.5  | 242    | 3.992576 | 1.914855 | -1.06008 | Down | 8.48E-24 | 3.96E-23 |

|              |      |        |        |          |          |          |      |          |          |
|--------------|------|--------|--------|----------|----------|----------|------|----------|----------|
| TRMT12       | 2232 | 404.5  | 192.5  | 5.294789 | 2.53969  | -1.05992 | Down | 1.77E-18 | 7.33E-18 |
| CNTRL        | 7431 | 697    | 333    | 2.745356 | 1.317004 | -1.05973 | Down | 2.13E-30 | 1.14E-29 |
| UROD         | 1408 | 2564   | 1208.5 | 52.89992 | 25.38351 | -1.05937 | Down | #####    | #####    |
| SNRPA        | 1646 | 2608   | 1225   | 45.90884 | 22.03491 | -1.05898 | Down | #####    | #####    |
| C2orf44      | 3779 | 433    | 203.5  | 3.315996 | 1.591789 | -1.05879 | Down | 3.09E-20 | 1.33E-19 |
| OBFC1        | 6483 | 956    | 450    | 4.280034 | 2.054751 | -1.05866 | Down | 2.27E-42 | 1.51E-41 |
| ZNF326       | 2729 | 1240.5 | 582    | 13.18917 | 6.33191  | -1.05864 | Down | 9.06E-55 | 7.13E-54 |
| TENC1        | 4690 | 3503   | 1652   | 21.71078 | 10.4254  | -1.05831 | Down | #####    | #####    |
| LOC100131091 | 1240 | 58     | 27     | 1.346778 | 0.64709  | -1.05747 | Down | 0.000732 | 0.001523 |
| UGT1A10      | 2399 | 329    | 155.5  | 3.975215 | 1.910549 | -1.05705 | Down | 1.37E-15 | 5.25E-15 |
| TLE4         | 4749 | 3385   | 1592   | 20.6651  | 9.937694 | -1.05621 | Down | #####    | #####    |
| ANKRD9       | 1626 | 271    | 128    | 4.837968 | 2.327019 | -1.05592 | Down | 4.89E-13 | 1.70E-12 |
| PPP2R1B      | 5470 | 1480   | 698    | 7.848214 | 3.775899 | -1.05554 | Down | 2.26E-64 | 2.00E-63 |
| C6orf26      | 917  | 56.5   | 27     | 1.795507 | 0.864091 | -1.05514 | Down | 0.001404 | 0.00286  |
| HGF          | 2805 | 29413  | 13835  | 303.8201 | 146.256  | -1.05472 | Down | 0        | 0        |
| BEX1         | 862  | 73     | 35     | 2.479162 | 1.194293 | -1.0537  | Down | 0.000237 | 0.000512 |
| KIAA0586     | 5600 | 841.5  | 395    | 4.343619 | 2.092504 | -1.05367 | Down | 1.20E-37 | 7.36E-37 |
| FANCI        | 4749 | 2702   | 1271   | 16.46926 | 7.93628  | -1.05324 | Down | #####    | #####    |
| HDCC2        | 1615 | 924    | 435.5  | 16.60082 | 8.000553 | -1.05308 | Down | 5.36E-41 | 3.47E-40 |
| METTL5       | 956  | 791    | 372    | 23.95919 | 11.54802 | -1.05293 | Down | 2.05E-35 | 1.22E-34 |
| UBTF         | 4603 | 4324   | 2040.5 | 27.25678 | 13.13854 | -1.05281 | Down | #####    | #####    |
| METAP2       | 3506 | 3176.5 | 1498.5 | 26.27934 | 12.66757 | -1.05279 | Down | #####    | #####    |
| NDUFB10      | 741  | 2640   | 1248   | 103.4242 | 49.86854 | -1.05237 | Down | #####    | #####    |
| GNB1L        | 1537 | 183    | 87     | 3.470141 | 1.673937 | -1.05175 | Down | 3.78E-09 | 1.03E-08 |
| CDH26        | 3193 | 50     | 25     | 0.47031  | 0.226904 | -1.05153 | Down | 0.003836 | 0.007523 |

|         |       |         |        |          |          |          |      |          |          |
|---------|-------|---------|--------|----------|----------|----------|------|----------|----------|
| C6orf1  | 1244  | 946.5   | 447.5  | 22.08534 | 10.65579 | -1.05145 | Down | 1.29E-41 | 8.49E-41 |
| NR2F1   | 3210  | 13461.5 | 6377   | 121.8577 | 58.80277 | -1.05124 | Down | 0        | 0        |
| DZIP3   | 5568  | 790.5   | 373    | 4.114679 | 1.98588  | -1.051   | Down | 4.37E-35 | 2.56E-34 |
| F12     | 2060  | 160     | 76     | 2.266788 | 1.094161 | -1.05082 | Down | 3.50E-08 | 9.24E-08 |
| KDM5D   | 5331  | 2104    | 994    | 11.42778 | 5.516528 | -1.05071 | Down | 2.09E-90 | 2.39E-89 |
| C8orf41 | 2198  | 789.5   | 372.5  | 10.4237  | 5.031892 | -1.0507  | Down | 3.80E-35 | 2.24E-34 |
| AATF    | 2172  | 2632.5  | 1244.5 | 35.17143 | 16.9804  | -1.05053 | Down | #####    | #####    |
| OTX1    | 2872  | 57      | 27     | 0.577349 | 0.278886 | -1.04977 | Down | 0.001016 | 0.002091 |
| PRDM10  | 6318  | 679.5   | 323    | 3.122949 | 1.508671 | -1.04963 | Down | 6.35E-30 | 3.37E-29 |
| CKAP5   | 6534  | 8905.5  | 4204.5 | 39.48052 | 19.0758  | -1.0494  | Down | 0        | 0        |
| BARD1   | 2610  | 342.5   | 163    | 3.817619 | 1.845788 | -1.04844 | Down | 8.76E-16 | 3.39E-15 |
| BZW2    | 1883  | 2568    | 1214.5 | 39.55148 | 19.12344 | -1.04839 | Down | #####    | #####    |
| MTMR2   | 4674  | 4586.5  | 2170   | 28.44186 | 13.75761 | -1.04779 | Down | #####    | #####    |
| FBXL19  | 3814  | 2143    | 1020.5 | 16.34529 | 7.906593 | -1.04775 | Down | 1.36E-90 | 1.55E-89 |
| SPSB1   | 3130  | 340.5   | 162    | 3.158575 | 1.52807  | -1.04756 | Down | 1.04E-15 | 4.01E-15 |
| DNTTIP2 | 2725  | 3140    | 1483.5 | 33.37818 | 16.16785 | -1.04578 | Down | #####    | #####    |
| DCLRE1B | 3795  | 743.5   | 351.5  | 5.675796 | 2.749812 | -1.04549 | Down | 4.63E-33 | 2.62E-32 |
| NFYC    | 2102  | 1672.5  | 793.5  | 23.08523 | 11.18598 | -1.04528 | Down | 1.25E-71 | 1.21E-70 |
| EID2    | 1409  | 470.5   | 222.5  | 9.662046 | 4.682126 | -1.04517 | Down | 1.65E-21 | 7.28E-21 |
| CENPP   | 3428  | 376     | 178.5  | 3.178516 | 1.540294 | -1.04515 | Down | 1.95E-17 | 7.86E-17 |
| ZW10    | 2900  | 554.5   | 262    | 5.527353 | 2.67869  | -1.04506 | Down | 5.22E-25 | 2.51E-24 |
| CAD     | 7108  | 3510.5  | 1665   | 14.288   | 6.92534  | -1.04485 | Down | #####    | #####    |
| RFC2    | 1613  | 1925    | 916    | 34.66398 | 16.80211 | -1.04479 | Down | 1.30E-81 | 1.37E-80 |
| ENAH    | 13172 | 9646    | 4574.5 | 21.23804 | 10.2971  | -1.04441 | Down | 0        | 0        |
| FZD9    | 2342  | 116     | 55.5   | 1.446223 | 0.701299 | -1.04419 | Down | 2.60E-06 | 6.30E-06 |

|          |      |         |        |          |          |          |      |          |          |
|----------|------|---------|--------|----------|----------|----------|------|----------|----------|
| GPAM     | 6390 | 1018    | 483    | 4.619176 | 2.241528 | -1.04315 | Down | 2.86E-44 | 1.96E-43 |
| FUBP1    | 2884 | 4135.5  | 1964.5 | 41.59411 | 20.18595 | -1.04303 | Down | #####    | #####    |
| TAF6     | 2458 | 4365.5  | 2080.5 | 51.63318 | 25.06363 | -1.0427  | Down | #####    | #####    |
| MTERFD1  | 1424 | 802     | 381    | 16.33692 | 7.933535 | -1.0421  | Down | 3.83E-35 | 2.25E-34 |
| SLIRP    | 436  | 1015    | 481    | 67.32738 | 32.70594 | -1.04164 | Down | 2.96E-44 | 2.02E-43 |
| MRPS30   | 1686 | 1132.5  | 537.5  | 19.45554 | 9.451207 | -1.04161 | Down | 4.75E-49 | 3.46E-48 |
| DNAJC17  | 1031 | 280     | 133.5  | 7.88711  | 3.831893 | -1.04144 | Down | 2.82E-13 | 9.93E-13 |
| STXBP4   | 6046 | 386.5   | 183.5  | 1.853895 | 0.900797 | -1.04129 | Down | 8.28E-18 | 3.36E-17 |
| PEX14    | 1945 | 336.5   | 161.5  | 5.046764 | 2.453458 | -1.04054 | Down | 2.28E-15 | 8.69E-15 |
| CMKLR1   | 5283 | 167.5   | 82.5   | 0.93352  | 0.453832 | -1.04052 | Down | 5.70E-08 | 1.49E-07 |
| VPS36    | 4427 | 1531    | 727    | 10.02541 | 4.876631 | -1.0397  | Down | 1.42E-65 | 1.28E-64 |
| DHFRL1   | 4047 | 344.5   | 164    | 2.469345 | 1.201958 | -1.03874 | Down | 7.38E-16 | 2.86E-15 |
| SET      | 2936 | 15538.5 | 7379   | 153.2857 | 74.62136 | -1.03856 | Down | 0        | 0        |
| ARHGAP28 | 5542 | 161     | 77.5   | 0.847619 | 0.412728 | -1.03823 | Down | 4.02E-08 | 1.06E-07 |
| GCNT3    | 2240 | 162     | 80.5   | 2.141839 | 1.042933 | -1.0382  | Down | 1.09E-07 | 2.82E-07 |
| NDOR1    | 4726 | 1578    | 754.5  | 9.691157 | 4.718983 | -1.03819 | Down | 1.22E-66 | 1.11E-65 |
| DCK      | 2618 | 1277.5  | 607.5  | 14.14257 | 6.889748 | -1.03752 | Down | 7.11E-55 | 5.60E-54 |
| CCNE1    | 2021 | 594     | 283.5  | 8.527656 | 4.15462  | -1.03743 | Down | 2.69E-26 | 1.32E-25 |
| PPM1G    | 2265 | 4952    | 2360   | 63.43944 | 30.91437 | -1.0371  | Down | #####    | #####    |
| TSPYL1   | 5259 | 2423    | 1160.5 | 13.39819 | 6.529395 | -1.03702 | Down | #####    | #####    |
| GPRIN1   | 4208 | 531     | 254.5  | 3.659585 | 1.783789 | -1.03673 | Down | 1.75E-23 | 8.11E-23 |
| NCL      | 2732 | 25577.5 | 12195  | 271.5939 | 132.4041 | -1.0365  | Down | 0        | 0        |
| PACSIN3  | 1913 | 483.5   | 230.5  | 7.318826 | 3.568027 | -1.03649 | Down | 1.06E-21 | 4.69E-21 |
| GFER     | 2447 | 930     | 445.5  | 11.05535 | 5.390015 | -1.03638 | Down | 7.12E-40 | 4.52E-39 |
| FKBP3    | 1353 | 1352.5  | 644.5  | 28.94958 | 14.11598 | -1.03621 | Down | 9.80E-58 | 8.01E-57 |

|          |       |        |        |          |          |          |      |          |          |
|----------|-------|--------|--------|----------|----------|----------|------|----------|----------|
| KLHL8    | 4576  | 1208.5 | 576.5  | 7.65911  | 3.734844 | -1.03613 | Down | 1.16E-51 | 8.76E-51 |
| L3MBTL3  | 4217  | 435    | 207.5  | 2.989448 | 1.457965 | -1.03592 | Down | 1.00E-19 | 4.25E-19 |
| LAS1L    | 2448  | 1810   | 864    | 21.45027 | 10.46335 | -1.03565 | Down | 2.49E-76 | 2.51E-75 |
| ARAP2    | 7375  | 374.5  | 179.5  | 1.474228 | 0.719483 | -1.03493 | Down | 5.61E-17 | 2.24E-16 |
| PGPEP1   | 7084  | 1320   | 632.5  | 5.421658 | 2.64606  | -1.03489 | Down | 8.55E-56 | 6.82E-55 |
| TYRP1    | 2876  | 4542   | 2165.5 | 45.70714 | 22.31351 | -1.0345  | Down | #####    | #####    |
| EBAG9    | 1655  | 483    | 230.5  | 8.468664 | 4.135063 | -1.03423 | Down | 1.06E-21 | 4.69E-21 |
| PSMB6    | 849   | 3137   | 1505.5 | 107.3542 | 52.42272 | -1.03411 | Down | #####    | #####    |
| NSMAF    | 3522  | 2978   | 1420.5 | 24.49696 | 11.96237 | -1.0341  | Down | #####    | #####    |
| PRIC285  | 10002 | 4002   | 1922.5 | 11.62822 | 5.67883  | -1.03396 | Down | #####    | #####    |
| HOXA3    | 3396  | 1227.5 | 586.5  | 10.48372 | 5.120067 | -1.03392 | Down | 2.88E-52 | 2.19E-51 |
| UBLCP1   | 2410  | 2610.5 | 1245   | 31.36937 | 15.32286 | -1.03367 | Down | #####    | #####    |
| ADSL     | 1388  | 1255   | 601    | 26.22426 | 12.81542 | -1.03302 | Down | 4.12E-53 | 3.17E-52 |
| APOBEC3A | 1103  | 137    | 66     | 3.604466 | 1.762453 | -1.0322  | Down | 5.13E-07 | 1.28E-06 |
| C17orf80 | 3545  | 1098   | 526    | 8.995865 | 4.399951 | -1.03177 | Down | 1.19E-46 | 8.38E-46 |
| KIAA0664 | 5252  | 4041   | 1943.5 | 22.38511 | 10.94959 | -1.03166 | Down | #####    | #####    |
| DTX3     | 2029  | 297.5  | 143    | 4.256442 | 2.083587 | -1.03058 | Down | 1.26E-13 | 4.55E-13 |
| KIAA1826 | 4095  | 850.5  | 409    | 6.030782 | 2.953434 | -1.02995 | Down | 3.70E-36 | 2.21E-35 |
| SQSTM1   | 2931  | 40787  | 19585  | 403.933  | 197.8227 | -1.02991 | Down | 0        | 0        |
| SLC6A15  | 4362  | 107    | 51.5   | 0.71125  | 0.348371 | -1.02973 | Down | 7.23E-06 | 1.71E-05 |
| GEMIN2   | 1368  | 206.5  | 99.5   | 4.403665 | 2.15757  | -1.0293  | Down | 6.40E-10 | 1.81E-09 |
| MMP28    | 2480  | 140    | 67     | 1.633654 | 0.800434 | -1.02925 | Down | 3.16E-07 | 7.96E-07 |
| EXOSC2   | 2194  | 945.5  | 453.5  | 12.50968 | 6.131378 | -1.02876 | Down | 2.47E-40 | 1.58E-39 |
| SPTBN2   | 7884  | 453    | 219    | 1.678176 | 0.822571 | -1.02868 | Down | 7.94E-20 | 3.39E-19 |
| PTCH2    | 3773  | 71     | 34.5   | 0.549169 | 0.269212 | -1.02851 | Down | 0.000285 | 0.000611 |

|         |       |        |        |          |          |          |      |          |          |
|---------|-------|--------|--------|----------|----------|----------|------|----------|----------|
| FRAT1   | 2651  | 52     | 25     | 0.568487 | 0.278695 | -1.02844 | Down | 0.002031 | 0.004083 |
| MORC2   | 4467  | 1455   | 700.5  | 9.470585 | 4.646319 | -1.02737 | Down | 1.10E-60 | 9.33E-60 |
| LSM5    | 2212  | 2464   | 1179   | 32.24914 | 15.82175 | -1.02735 | Down | #####    | #####    |
| AR      | 4314  | 874.5  | 421    | 5.887419 | 2.888602 | -1.02726 | Down | 4.78E-37 | 2.90E-36 |
| MAGEA10 | 1610  | 60.5   | 29.5   | 1.096308 | 0.537957 | -1.02709 | Down | 0.000973 | 0.002006 |
| NARFL   | 2109  | 735    | 355    | 10.11536 | 4.964534 | -1.02682 | Down | 3.06E-31 | 1.67E-30 |
| TALDO1  | 1319  | 9425   | 4529.5 | 207.1676 | 101.7281 | -1.02608 | Down | 0        | 0        |
| AMIGO1  | 2501  | 116    | 56     | 1.34648  | 0.661352 | -1.0257  | Down | 4.08E-06 | 9.78E-06 |
| TCF3    | 4462  | 5213.5 | 2515   | 33.97483 | 16.68752 | -1.0257  | Down | #####    | #####    |
| TXN2    | 1342  | 1538   | 741.5  | 33.29962 | 16.36064 | -1.02528 | Down | 7.66E-64 | 6.71E-63 |
| PECAM1  | 6831  | 947    | 456    | 4.029906 | 1.980088 | -1.02518 | Down | 4.96E-40 | 3.16E-39 |
| NDUFA9  | 1621  | 2104.5 | 1012.5 | 37.59056 | 18.48648 | -1.0239  | Down | 5.59E-87 | 6.21E-86 |
| NETO2   | 3692  | 3794.5 | 1827   | 29.80869 | 14.66294 | -1.02356 | Down | #####    | #####    |
| KRBA2   | 1964  | 56     | 27     | 0.826547 | 0.406728 | -1.02303 | Down | 0.001404 | 0.002861 |
| USP49   | 3194  | 81     | 38.5   | 0.728958 | 0.358717 | -1.02299 | Down | 7.29E-05 | 0.000163 |
| DNAJC19 | 1488  | 601.5  | 288.5  | 11.71605 | 5.766443 | -1.02273 | Down | 2.85E-26 | 1.41E-25 |
| CSMD1   | 14340 | 88     | 44     | 0.181915 | 0.089544 | -1.0226  | Down | 0.000119 | 0.000261 |
| DUT     | 1874  | 2172.5 | 1044.5 | 33.5968  | 16.53768 | -1.02257 | Down | 7.31E-90 | 8.30E-89 |
| PTPLB   | 1187  | 728    | 351.5  | 17.84354 | 8.78489  | -1.02231 | Down | 4.48E-31 | 2.43E-30 |
| MRPS9   | 1473  | 616.5  | 296.5  | 12.11192 | 5.965727 | -1.02166 | Down | 9.86E-27 | 4.91E-26 |
| CCDC56  | 772   | 754    | 364    | 28.376   | 13.98121 | -1.02118 | Down | 4.87E-32 | 2.70E-31 |
| SLC2A8  | 2145  | 278.5  | 134.5  | 3.76341  | 1.854293 | -1.02117 | Down | 8.10E-13 | 2.77E-12 |
| NFIB    | 8507  | 2108   | 1016   | 7.178916 | 3.537425 | -1.02107 | Down | 9.43E-87 | 1.05E-85 |
| ALAS1   | 2258  | 2730   | 1318   | 35.09244 | 17.29257 | -1.02101 | Down | #####    | #####    |
| GTF3C6  | 957   | 1974.5 | 952.5  | 59.92711 | 29.53934 | -1.02057 | Down | 3.02E-81 | 3.18E-80 |

|          |      |        |        |          |          |          |      |          |          |
|----------|------|--------|--------|----------|----------|----------|------|----------|----------|
| KIF20B   | 6319 | 2381.5 | 1145.5 | 10.91281 | 5.379717 | -1.02042 | Down | 3.17E-98 | 3.82E-97 |
| FANCA    | 1673 | 1243   | 601    | 21.56895 | 10.63399 | -1.02027 | Down | 1.54E-51 | 1.16E-50 |
| FAM86A   | 2374 | 821.5  | 397    | 10.02199 | 4.941354 | -1.02019 | Down | 1.29E-34 | 7.52E-34 |
| CTPS     | 3217 | 4417.5 | 2129.5 | 39.78515 | 19.61662 | -1.02015 | Down | #####    | #####    |
| PSMB10   | 1019 | 3685.5 | 1787   | 105.0981 | 51.84895 | -1.01935 | Down | #####    | #####    |
| PLEKHH3  | 3076 | 1186   | 575.5  | 11.21293 | 5.531831 | -1.01933 | Down | 5.75E-49 | 4.19E-48 |
| SKA3     | 2808 | 1230.5 | 593.5  | 12.71417 | 6.272986 | -1.01921 | Down | 2.43E-51 | 1.83E-50 |
| RCC2     | 4109 | 4792.5 | 2314.5 | 33.84361 | 16.70321 | -1.01876 | Down | #####    | #####    |
| TRDMT1   | 7687 | 345    | 166    | 1.2938   | 0.638741 | -1.01831 | Down | 1.31E-15 | 5.03E-15 |
| FAM155A  | 3859 | 52     | 25.5   | 0.393504 | 0.194274 | -1.01829 | Down | 0.002031 | 0.004082 |
| MICB     | 2497 | 982    | 477    | 11.4435  | 5.651251 | -1.01789 | Down | 1.13E-40 | 7.28E-40 |
| POLR1B   | 5427 | 1198.5 | 582    | 6.416159 | 3.169532 | -1.01744 | Down | 3.17E-49 | 2.32E-48 |
| ZFP14    | 7502 | 193    | 95.5   | 0.75552  | 0.373435 | -1.01661 | Down | 5.86E-09 | 1.59E-08 |
| C16orf87 | 1410 | 660    | 319.5  | 13.58289 | 6.714226 | -1.0165  | Down | 3.54E-28 | 1.82E-27 |
| ZNRF3    | 6696 | 412    | 201    | 1.792949 | 0.886485 | -1.01617 | Down | 7.86E-18 | 3.20E-17 |
| ADNP     | 4713 | 4343.5 | 2111   | 26.77437 | 13.23978 | -1.01597 | Down | #####    | #####    |
| DPF1     | 2329 | 258    | 125.5  | 3.228192 | 1.596336 | -1.01596 | Down | 7.05E-12 | 2.22E-11 |
| DGAT2    | 2485 | 368.5  | 179    | 4.301801 | 2.127739 | -1.01562 | Down | 3.46E-16 | 1.35E-15 |
| ZNF260   | 5341 | 970.5  | 473.5  | 5.289248 | 2.616527 | -1.01541 | Down | 7.37E-40 | 4.68E-39 |
| USF1     | 1800 | 1718.5 | 834.5  | 27.74404 | 13.72552 | -1.01532 | Down | 6.22E-70 | 5.88E-69 |
| IMP4     | 1074 | 1567   | 760.5  | 42.44632 | 21.00151 | -1.01515 | Down | 4.49E-64 | 3.95E-63 |
| CHERP    | 4105 | 2722   | 1320   | 19.25974 | 9.531463 | -1.01482 | Down | #####    | #####    |
| EXOSC10  | 2759 | 2610   | 1264.5 | 27.44864 | 13.58434 | -1.01479 | Down | #####    | #####    |
| FEZ1     | 1781 | 100.5  | 49     | 1.651674 | 0.817448 | -1.01473 | Down | 2.63E-05 | 6.03E-05 |
| OXA1L    | 1737 | 2031   | 986.5  | 33.97662 | 16.81941 | -1.01442 | Down | 2.51E-82 | 2.67E-81 |



|          |      |        |        |          |          |          |      |          |          |
|----------|------|--------|--------|----------|----------|----------|------|----------|----------|
| DUS4L    | 2252 | 524    | 254.5  | 6.754931 | 3.344244 | -1.01426 | Down | 1.46E-22 | 6.61E-22 |
| ZNF319   | 4220 | 813.5  | 395.5  | 5.605693 | 2.77529  | -1.01425 | Down | 6.02E-34 | 3.47E-33 |
| SGOL1    | 2355 | 733    | 356    | 9.033057 | 4.472208 | -1.01423 | Down | 8.57E-31 | 4.62E-30 |
| FZD6     | 3806 | 2301   | 1114.5 | 17.52886 | 8.682869 | -1.01349 | Down | 1.36E-93 | 1.59E-92 |
| SLC25A29 | 2370 | 768    | 374    | 9.405192 | 4.659041 | -1.01342 | Down | 5.33E-32 | 2.95E-31 |
| MMS22L   | 8643 | 773.5  | 376    | 2.595973 | 1.286403 | -1.01293 | Down | 2.81E-32 | 1.56E-31 |
| RBBP9    | 3871 | 1397   | 678.5  | 10.46382 | 5.185295 | -1.01291 | Down | 3.11E-57 | 2.52E-56 |
| PDZRN3   | 4161 | 189.5  | 93     | 1.32984  | 0.658996 | -1.01291 | Down | 8.31E-09 | 2.25E-08 |
| DEM1     | 2217 | 69.5   | 34     | 0.911569 | 0.451957 | -1.01217 | Down | 0.000534 | 0.001125 |
| FASTKD1  | 3020 | 765.5  | 370    | 7.321686 | 3.630757 | -1.01191 | Down | 2.36E-32 | 1.31E-31 |
| ETFA     | 1369 | 4284   | 2076   | 90.70411 | 44.98595 | -1.01169 | Down | #####    | #####    |
| SRI      | 2030 | 3836   | 1861.5 | 54.80877 | 27.19141 | -1.01126 | Down | #####    | #####    |
| C16orf88 | 1974 | 947.5  | 462    | 13.95367 | 6.927651 | -1.01021 | Down | 6.49E-39 | 4.05E-38 |
| KIAA0922 | 5034 | 719    | 351    | 4.153421 | 2.06246  | -1.00993 | Down | 6.65E-30 | 3.53E-29 |
| LSM6     | 789  | 623    | 301    | 22.84347 | 11.34695 | -1.00948 | Down | 1.04E-26 | 5.17E-26 |
| DARS2    | 3348 | 1810.5 | 879    | 15.66596 | 7.783196 | -1.0092  | Down | 1.62E-73 | 1.59E-72 |
| FAM92A1  | 1135 | 1003   | 488    | 25.63775 | 12.73892 | -1.00903 | Down | 2.33E-41 | 1.52E-40 |
| GTPBP3   | 2549 | 353.5  | 172.5  | 4.029476 | 2.002528 | -1.00877 | Down | 1.56E-15 | 5.98E-15 |
| SNX18    | 3259 | 2201   | 1070   | 19.59622 | 9.740247 | -1.00854 | Down | 8.63E-89 | 9.71E-88 |
| CABYR    | 2279 | 108    | 53.5   | 1.38466  | 0.688394 | -1.00823 | Down | 1.29E-05 | 3.00E-05 |
| SUCLG1   | 1475 | 1981   | 965    | 38.94312 | 19.36259 | -1.0081  | Down | 9.65E-80 | 1.00E-78 |
| MPHOSPH9 | 3624 | 624    | 303    | 4.982026 | 2.47728  | -1.00798 | Down | 1.82E-26 | 8.99E-26 |
| THAP10   | 2119 | 168    | 81.5   | 2.290139 | 1.139105 | -1.00753 | Down | 2.72E-08 | 7.21E-08 |
| PPIF     | 2213 | 3325   | 1621.5 | 43.61214 | 21.69329 | -1.00748 | Down | #####    | #####    |
| MPP1     | 2016 | 782    | 381    | 11.24833 | 5.59568  | -1.00733 | Down | 1.61E-32 | 9.01E-32 |

|          |      |        |        |          |          |          |      |          |          |
|----------|------|--------|--------|----------|----------|----------|------|----------|----------|
| JAKMIP3  | 6488 | 122    | 59.5   | 0.544865 | 0.271203 | -1.00653 | Down | 2.40E-06 | 5.82E-06 |
| SSRP1    | 2825 | 8212.5 | 4000   | 84.30189 | 41.97516 | -1.00603 | Down | 0        | 0        |
| DPH5     | 1828 | 933    | 455    | 14.79956 | 7.369807 | -1.00586 | Down | 2.14E-38 | 1.33E-37 |
| SHKBP1   | 2379 | 2377.5 | 1163   | 29.0757  | 14.47897 | -1.00585 | Down | 2.26E-94 | 2.65E-93 |
| PHC1     | 5206 | 1007   | 490.5  | 5.606528 | 2.792161 | -1.00573 | Down | 1.66E-41 | 1.09E-40 |
| EXOSC3   | 1070 | 955    | 465    | 25.86322 | 12.88371 | -1.00535 | Down | 2.14E-39 | 1.35E-38 |
| RIOK1    | 1796 | 890    | 433.5  | 14.36406 | 7.156474 | -1.00514 | Down | 6.80E-37 | 4.12E-36 |
| DDX11    | 3797 | 1622   | 792    | 12.38644 | 6.171275 | -1.00512 | Down | 2.81E-65 | 2.52E-64 |
| BAI2     | 5434 | 1245.5 | 609.5  | 6.650671 | 3.315376 | -1.00433 | Down | 2.55E-50 | 1.89E-49 |
| PRKD2    | 2939 | 1526.5 | 749    | 15.11625 | 7.536575 | -1.00412 | Down | 8.20E-61 | 6.96E-60 |
| ATR      | 8258 | 1867   | 911    | 6.549641 | 3.2655   | -1.00411 | Down | 5.61E-75 | 5.58E-74 |
| DUS2L    | 1999 | 489    | 240    | 7.111782 | 3.546249 | -1.00392 | Down | 1.30E-20 | 5.65E-20 |
| C7orf49  | 1589 | 1803   | 881    | 32.92887 | 16.42107 | -1.00381 | Down | 3.03E-72 | 2.94E-71 |
| KANK2    | 4966 | 4311.5 | 2111   | 25.23685 | 12.5889  | -1.00338 | Down | #####    | #####    |
| AIP      | 1250 | 1866   | 912.5  | 43.3592  | 21.6331  | -1.0031  | Down | 1.15E-74 | 1.14E-73 |
| DDX20    | 3513 | 1105.5 | 540.5  | 9.133828 | 4.557169 | -1.00308 | Down | 5.94E-45 | 4.09E-44 |
| PFDN2    | 668  | 2370   | 1155.5 | 102.786  | 51.29713 | -1.00269 | Down | 6.12E-95 | 7.23E-94 |
| ZNHIT2   | 1321 | 318.5  | 157    | 7.019823 | 3.503576 | -1.00261 | Down | 9.23E-14 | 3.34E-13 |
| NDUFS3   | 971  | 1575.5 | 770.5  | 47.1224  | 23.52271 | -1.00236 | Down | 2.90E-63 | 2.52E-62 |
| RARRES3  | 779  | 554.5  | 272    | 20.63571 | 10.30287 | -1.0021  | Down | 3.99E-23 | 1.84E-22 |
| TRIM45   | 3527 | 228.5  | 114.5  | 1.903996 | 0.95072  | -1.00194 | Down | 5.20E-10 | 1.48E-09 |
| TGIF2    | 3358 | 567    | 277.5  | 4.905776 | 2.450256 | -1.00155 | Down | 6.94E-24 | 3.25E-23 |
| RALGPS1  | 2362 | 101.5  | 50     | 1.252362 | 0.625589 | -1.00137 | Down | 2.98E-05 | 6.82E-05 |
| C19orf20 | 1134 | 415    | 204    | 10.62438 | 5.307844 | -1.00118 | Down | 1.15E-17 | 4.64E-17 |
| LYAR     | 1584 | 957.5  | 468.5  | 17.56189 | 8.774151 | -1.00112 | Down | 4.22E-39 | 2.64E-38 |

Supplementary Table 2

| GeneID       | Gene_length | C6-DMSO-Expression | C6-331-Expression | C6-DMSO-RPKM | C6-331-RPKM | log2 Ratio(C6-331/C6-DMSO) | Up-Down-Regulation<br>(331/DMSO) | P-value | FDR |
|--------------|-------------|--------------------|-------------------|--------------|-------------|----------------------------|----------------------------------|---------|-----|
| Cxcl2        | 1101        | 0                  | 1803              | 0.001        | 54.67023    | 15.73847                   | Up                               | 0       | 0   |
| Otor         | 919         | 0                  | 499               | 0.001        | 18.11275    | 14.14472                   | Up                               | 0       | 0   |
| LOC100909799 | 819         | 0                  | 443               | 0.001        | 17.57221    | 14.10101                   | Up                               | 0       | 0   |
| Il22ra2      | 2506        | 0                  | 950.5             | 0.001        | 12.6595     | 13.62793                   | Up                               | 0       | 0   |
| Arl9         | 645         | 0                  | 220               | 0.001        | 11.39473    | 13.47608                   | Up                               | 0       | 0   |
| LOC100359479 | 768         | 0                  | 259.5             | 0.001        | 11.29105    | 13.46289                   | Up                               | 0       | 0   |
| LOC367195    | 457         | 0                  | 138               | 0.001        | 10.10346    | 13.30256                   | Up                               | 0       | 0   |
| Olr1646      | 945         | 0                  | 236               | 0.001        | 8.339775    | 13.02579                   | Up                               | 0       | 0   |
| LOC100912293 | 528         | 0                  | 110               | 0.001        | 6.955586    | 12.76396                   | Up                               | 0       | 0   |
| LOC100912893 | 1965        | 0                  | 406.5             | 0.001        | 6.904676    | 12.75336                   | Up                               | 0       | 0   |
| Nox4         | 2176        | 0                  | 428.5             | 0.001        | 6.562775    | 12.68009                   | Up                               | 0       | 0   |
| RGD1561410   | 618         | 0                  | 112               | 0.001        | 6.041946    | 12.5608                    | Up                               | 0       | 0   |
| Ccl20        | 816         | 0                  | 125.5             | 0.001        | 5.13541     | 12.32626                   | Up                               | 0       | 0   |
| LOC100910820 | 1527        | 0                  | 221.5             | 0.001        | 4.712391    | 12.20224                   | Up                               | 0       | 0   |
| Uts2d        | 747         | 0                  | 98.5              | 0.001        | 4.398194    | 12.1027                    | Up                               | 0       | 0   |
| Lyz2         | 1223        | 0                  | 156               | 0.001        | 4.243943    | 12.05119                   | Up                               | 0       | 0   |
| S100a7a      | 581         | 0                  | 65                | 0.001        | 3.730538    | 11.86517                   | Up                               | 0       | 0   |
| C1qtnf4      | 1348        | 0                  | 144.5             | 0.001        | 3.563905    | 11.79924                   | Up                               | 0       | 0   |
| Ptcra        | 621         | 0                  | 59.5              | 0.001        | 3.180781    | 11.63517                   | Up                               | 0       | 0   |
| LOC100359989 | 649         | 0                  | 60                | 0.001        | 3.07274     | 11.58531                   | Up                               | 0       | 0   |

|              |      |   |       |       |          |          |    |          |          |
|--------------|------|---|-------|-------|----------|----------|----|----------|----------|
| LOC679753    | 302  | 0 | 26.5  | 0.001 | 2.931128 | 11.51724 | Up | 1.49E-08 | 3.43E-08 |
| Wfikn2       | 1608 | 0 | 140.5 | 0.001 | 2.905719 | 11.50468 | Up | 0        | 0        |
| Asb11        | 1317 | 0 | 103   | 0.001 | 2.613851 | 11.35196 | Up | 0        | 0        |
| Alox15       | 2216 | 0 | 172   | 0.001 | 2.588146 | 11.33377 | Up | 0        | 0        |
| LOC100912017 | 2709 | 0 | 207.5 | 0.001 | 2.550835 | 11.31675 | Up | 0        | 0        |
| LOC100910784 | 588  | 0 | 42.5  | 0.001 | 2.348109 | 11.19728 | Up | 2.27E-13 | 8.19E-13 |
| LOC100911329 | 570  | 0 | 38    | 0.001 | 2.165785 | 11.08067 | Up | 3.64E-12 | 1.03E-11 |
| Cyp2b21      | 1885 | 0 | 121.5 | 0.001 | 2.149362 | 11.06969 | Up | 0        | 0        |
| LOC100362620 | 240  | 0 | 15.5  | 0.001 | 2.131856 | 11.05789 | Up | 3.05E-05 | 5.93E-05 |
| Lcn11        | 669  | 0 | 42    | 0.001 | 2.08527  | 11.02602 | Up | 2.27E-13 | 8.19E-13 |
| RGD1559679   | 403  | 0 | 25    | 0.001 | 2.073376 | 11.01777 | Up | 2.98E-08 | 6.78E-08 |
| LOC363746    | 619  | 0 | 38    | 0.001 | 2.052502 | 11.00317 | Up | 3.64E-12 | 1.03E-11 |
| RGD1562229   | 921  | 0 | 56    | 0.001 | 2.014398 | 10.97613 | Up | 0        | 0        |
| RGD1559980   | 364  | 0 | 22    | 0.001 | 2.007994 | 10.97154 | Up | 2.38E-07 | 5.24E-07 |
| LOC100909551 | 1518 | 0 | 91    | 0.001 | 2.000856 | 10.9664  | Up | 0        | 0        |
| LOC100909765 | 582  | 0 | 35    | 0.001 | 1.953672 | 10.93197 | Up | 2.91E-11 | 7.39E-11 |
| LOC500007    | 657  | 0 | 37.5  | 0.001 | 1.893996 | 10.88722 | Up | 7.28E-12 | 1.94E-11 |
| Sh2d5        | 1386 | 0 | 78.5  | 0.001 | 1.880241 | 10.8767  | Up | 0        | 0        |
| RGD1562344   | 850  | 0 | 47    | 0.001 | 1.855624 | 10.85769 | Up | 7.11E-15 | 2.97E-14 |
| Dand5        | 555  | 0 | 30    | 0.001 | 1.801449 | 10.81494 | Up | 9.31E-10 | 2.24E-09 |
| Krtap3-3l1   | 713  | 0 | 38.5  | 0.001 | 1.795851 | 10.81045 | Up | 3.64E-12 | 1.03E-11 |
| Cuzd1        | 2282 | 0 | 121   | 0.001 | 1.76753  | 10.78752 | Up | 0        | 0        |
| Tll2         | 3045 | 0 | 161   | 0.001 | 1.763802 | 10.78447 | Up | 0        | 0        |
| Gpr151       | 1395 | 0 | 73.5  | 0.001 | 1.761993 | 10.78299 | Up | 0        | 0        |
| LOC100911244 | 722  | 0 | 39    | 0.001 | 1.754826 | 10.77711 | Up | 1.82E-12 | 5.48E-12 |

|              |      |   |       |       |          |          |    |          |          |
|--------------|------|---|-------|-------|----------|----------|----|----------|----------|
| LOC688802    | 1167 | 0 | 61    | 0.001 | 1.736671 | 10.76211 | Up | 0        | 0        |
| Lypd6b       | 2326 | 0 | 120   | 0.001 | 1.712389 | 10.74179 | Up | 0        | 0        |
| Gzmm         | 952  | 0 | 48.5  | 0.001 | 1.692868 | 10.72525 | Up | 3.55E-15 | 1.49E-14 |
| RGD1564897   | 570  | 0 | 29    | 0.001 | 1.6781   | 10.71261 | Up | 1.86E-09 | 4.43E-09 |
| LOC300024    | 848  | 0 | 40.5  | 0.001 | 1.591882 | 10.63652 | Up | 9.09E-13 | 2.89E-12 |
| LOC683581    | 694  | 0 | 33    | 0.001 | 1.587557 | 10.63259 | Up | 1.16E-10 | 2.89E-10 |
| LOC100911585 | 1484 | 0 | 67.5  | 0.001 | 1.51163  | 10.56189 | Up | 0        | 0        |
| LOC365062    | 1356 | 0 | 61    | 0.001 | 1.502578 | 10.55322 | Up | 0        | 0        |
| LOC100362780 | 1008 | 0 | 44.5  | 0.001 | 1.475261 | 10.52675 | Up | 5.68E-14 | 2.25E-13 |
| L3mbt1       | 2481 | 0 | 108.5 | 0.001 | 1.458815 | 10.51058 | Up | 0        | 0        |
| LOC100911132 | 2442 | 0 | 108   | 0.001 | 1.436762 | 10.48861 | Up | 0        | 0        |
| Il23r        | 1920 | 0 | 81    | 0.001 | 1.411787 | 10.46331 | Up | 0        | 0        |
| Crygs        | 696  | 0 | 29    | 0.001 | 1.39241  | 10.44337 | Up | 1.86E-09 | 4.43E-09 |
| RGD1306626   | 1295 | 0 | 53.5  | 0.001 | 1.381733 | 10.43226 | Up | 0        | 0        |
| Serpina7     | 1748 | 0 | 72    | 0.001 | 1.37623  | 10.42651 | Up | 0        | 0        |
| Slc8a2       | 3004 | 0 | 123   | 0.001 | 1.361943 | 10.41145 | Up | 0        | 0        |
| Spint3       | 441  | 0 | 18    | 0.001 | 1.356604 | 10.40578 | Up | 3.81E-06 | 7.86E-06 |
| LOC683684    | 615  | 0 | 24    | 0.001 | 1.3029   | 10.34751 | Up | 5.96E-08 | 1.34E-07 |
| Hic1         | 3411 | 0 | 128   | 0.001 | 1.249432 | 10.28706 | Up | 0        | 0        |
| Spic         | 1133 | 0 | 42    | 0.001 | 1.240818 | 10.27708 | Up | 2.27E-13 | 8.19E-13 |
| RGD1559917   | 327  | 0 | 12    | 0.001 | 1.219699 | 10.25231 | Up | 0.000244 | 0.00044  |
| Glyat13      | 873  | 0 | 32    | 0.001 | 1.215553 | 10.2474  | Up | 2.33E-10 | 5.71E-10 |
| Glit8d4      | 1832 | 0 | 66    | 0.001 | 1.19887  | 10.22746 | Up | 0        | 0        |
| Tac2         | 727  | 0 | 26    | 0.001 | 1.184122 | 10.2096  | Up | 1.49E-08 | 3.43E-08 |
| LOC684709    | 909  | 0 | 32    | 0.001 | 1.179294 | 10.20371 | Up | 2.33E-10 | 5.71E-10 |

|              |      |   |        |          |          |          |    |          |          |
|--------------|------|---|--------|----------|----------|----------|----|----------|----------|
| Tmprss4      | 2235 | 0 | 79     | 0.001    | 1.177297 | 10.20126 | Up | 0        | 0        |
| Ak5          | 955  | 0 | 33     | 0.001    | 1.154623 | 10.17321 | Up | 1.16E-10 | 2.89E-10 |
| LOC100909507 | 495  | 0 | 17.5   | 0.001    | 1.148522 | 10.16556 | Up | 7.63E-06 | 1.54E-05 |
| LOC100911106 | 611  | 0 | 21     | 0.001    | 1.13719  | 10.15126 | Up | 4.77E-07 | 1.03E-06 |
| LOC100912067 | 1038 | 0 | 34.5   | 0.001    | 1.110978 | 10.11761 | Up | 5.82E-11 | 1.46E-10 |
| Ccl4         | 279  | 0 | 9      | 0.001    | 1.060864 | 10.05102 | Up | 0.001953 | 0.003246 |
| Tnni1        | 821  | 0 | 26     | 0.001    | 1.055124 | 10.0432  | Up | 1.49E-08 | 3.43E-08 |
| Angptl4      | 1871 | 1 | 1108.5 | 0.018819 | 19.79563 | 10.0388  | Up | 0.000575 | 0.001004 |
| Krtap1-5     | 369  | 0 | 11.5   | 0.001    | 1.029534 | 10.00778 | Up | 0.000488 | 0.000864 |
| Olr837       | 948  | 0 | 28.5   | 0.001    | 1.017484 | 9.99079  | Up | 3.73E-09 | 8.78E-09 |
| C4bpb        | 1144 | 0 | 34.5   | 0.001    | 1.005677 | 9.973952 | Up | 5.82E-11 | 1.46E-10 |
| Klk9         | 1032 | 0 | 31     | 0.001    | 1.003771 | 9.971214 | Up | 4.66E-10 | 1.13E-09 |
| Fam24a       | 571  | 0 | 17     | 0.001    | 1.001884 | 9.9685   | Up | 7.63E-06 | 1.54E-05 |
| LOC100910954 | 749  | 0 | 23     | 0.001    | 0.997591 | 9.962305 | Up | 1.19E-07 | 2.65E-07 |
| RGD1563606   | 609  | 0 | 18     | 0.001    | 0.99567  | 9.959523 | Up | 3.81E-06 | 7.85E-06 |
| LOC100361147 | 435  | 0 | 13     | 0.001    | 0.99156  | 9.953556 | Up | 0.000122 | 0.000224 |
| LOC100910525 | 1401 | 0 | 41     | 0.001    | 0.982841 | 9.940814 | Up | 4.55E-13 | 1.54E-12 |
| Fgf17        | 651  | 0 | 19     | 0.001    | 0.975806 | 9.93045  | Up | 1.91E-06 | 3.99E-06 |
| Tprg1        | 1103 | 0 | 32     | 0.001    | 0.968611 | 9.919774 | Up | 2.33E-10 | 5.71E-10 |
| Atp13a4      | 3901 | 0 | 112    | 0.001    | 0.957632 | 9.903328 | Up | 0        | 0        |
| LOC100912135 | 692  | 0 | 20     | 0.001    | 0.938924 | 9.874865 | Up | 9.54E-07 | 2.03E-06 |
| Ccdc116      | 1991 | 0 | 55.5   | 0.001    | 0.925473 | 9.854048 | Up | 0        | 0        |
| Amy1a        | 1639 | 0 | 45     | 0.001    | 0.918308 | 9.842834 | Up | 2.84E-14 | 1.16E-13 |
| LOC688823    | 1410 | 0 | 38     | 0.001    | 0.904893 | 9.821603 | Up | 3.64E-12 | 1.03E-11 |
| LOC100911739 | 777  | 0 | 21     | 0.001    | 0.904663 | 9.821237 | Up | 4.77E-07 | 1.03E-06 |

|              |      |   |       |          |          |          |    |          |          |
|--------------|------|---|-------|----------|----------|----------|----|----------|----------|
| Ppp1r42      | 1426 | 0 | 38.5  | 0.001    | 0.899188 | 9.812479 | Up | 3.64E-12 | 1.03E-11 |
| LOC100911047 | 332  | 0 | 9     | 0.001    | 0.896931 | 9.808854 | Up | 0.001953 | 0.003244 |
| Tmem190      | 537  | 0 | 14    | 0.001    | 0.87042  | 9.765567 | Up | 6.10E-05 | 0.000116 |
| LOC100362253 | 789  | 0 | 20.5  | 0.001    | 0.870317 | 9.765396 | Up | 9.54E-07 | 2.03E-06 |
| LOC681827    | 927  | 0 | 24    | 0.001    | 0.866325 | 9.758765 | Up | 5.96E-08 | 1.34E-07 |
| LOC100909803 | 783  | 0 | 20    | 0.001    | 0.848194 | 9.728251 | Up | 9.54E-07 | 2.03E-06 |
| Fam217a      | 1876 | 0 | 46    | 0.001    | 0.818653 | 9.677109 | Up | 1.42E-14 | 5.86E-14 |
| LOC687707    | 702  | 0 | 17    | 0.001    | 0.812359 | 9.665973 | Up | 7.63E-06 | 1.54E-05 |
| Lyc2         | 1601 | 0 | 38.5  | 0.001    | 0.803149 | 9.649525 | Up | 3.64E-12 | 1.03E-11 |
| RGD1304622   | 4254 | 0 | 102   | 0.001    | 0.801799 | 9.647098 | Up | 0        | 0        |
| Tnfrsf18     | 1029 | 0 | 24.5  | 0.001    | 0.790988 | 9.627512 | Up | 5.96E-08 | 1.34E-07 |
| LOC683536    | 459  | 0 | 10.5  | 0.001    | 0.780418 | 9.608103 | Up | 0.000977 | 0.001662 |
| Fam186b      | 3140 | 0 | 72.5  | 0.001    | 0.77417  | 9.596507 | Up | 0        | 0        |
| LOC681354    | 741  | 0 | 17    | 0.001    | 0.767174 | 9.58341  | Up | 7.63E-06 | 1.54E-05 |
| Vom1r73      | 918  | 0 | 21    | 0.001    | 0.76277  | 9.575105 | Up | 4.77E-07 | 1.03E-06 |
| LOC691189    | 471  | 0 | 10.5  | 0.001    | 0.75098  | 9.552631 | Up | 0.000977 | 0.001658 |
| Tmem182      | 2708 | 0 | 60    | 0.001    | 0.741067 | 9.53346  | Up | 0        | 0        |
| LOC100911540 | 1079 | 1 | 780.5 | 0.032632 | 23.50031 | 9.492182 | Up | 0.000575 | 0.001009 |
| Cplx4        | 613  | 0 | 13    | 0.001    | 0.706572 | 9.464692 | Up | 0.000122 | 0.000224 |
| Ctage5       | 2027 | 0 | 42.5  | 0.001    | 0.702906 | 9.457187 | Up | 2.27E-13 | 8.19E-13 |
| Ptger3       | 1253 | 0 | 26.5  | 0.001    | 0.702873 | 9.457121 | Up | 1.49E-08 | 3.43E-08 |
| LOC498446    | 1335 | 0 | 28    | 0.001    | 0.700922 | 9.45311  | Up | 3.73E-09 | 8.78E-09 |
| LOC100363341 | 1816 | 0 | 38    | 0.001    | 0.691684 | 9.43397  | Up | 3.64E-12 | 1.03E-11 |
| Klk8         | 1302 | 0 | 27    | 0.001    | 0.687514 | 9.425246 | Up | 7.45E-09 | 1.74E-08 |
| LOC100363124 | 1041 | 0 | 21    | 0.001    | 0.667457 | 9.382531 | Up | 4.77E-07 | 1.03E-06 |

|              |      |   |      |       |          |          |    |          |          |
|--------------|------|---|------|-------|----------|----------|----|----------|----------|
| Serpina3k    | 1700 | 0 | 33.5 | 0.001 | 0.658711 | 9.363501 | Up | 1.16E-10 | 2.89E-10 |
| Lbx2         | 816  | 0 | 16   | 0.001 | 0.656849 | 9.359419 | Up | 1.53E-05 | 3.03E-05 |
| LOC683129    | 1419 | 0 | 27.5 | 0.001 | 0.654325 | 9.353864 | Up | 7.45E-09 | 1.74E-08 |
| Adcy1        | 3219 | 0 | 63   | 0.001 | 0.653703 | 9.352491 | Up | 0        | 0        |
| Pvalb        | 563  | 0 | 11   | 0.001 | 0.650719 | 9.345891 | Up | 0.000488 | 0.000863 |
| Olr836       | 960  | 0 | 18   | 0.001 | 0.635378 | 9.311472 | Up | 3.81E-06 | 7.85E-06 |
| LOC100909834 | 2728 | 0 | 52   | 0.001 | 0.633766 | 9.307807 | Up | 2.22E-16 | 9.52E-16 |
| RGD1561147   | 927  | 0 | 17   | 0.001 | 0.617126 | 9.269422 | Up | 7.63E-06 | 1.54E-05 |
| Sdr42e2      | 1251 | 0 | 23   | 0.001 | 0.615985 | 9.266751 | Up | 1.19E-07 | 2.65E-07 |
| LOC100910896 | 1114 | 0 | 21   | 0.001 | 0.612408 | 9.258349 | Up | 4.77E-07 | 1.03E-06 |
| Asb9         | 963  | 0 | 17.5 | 0.001 | 0.609989 | 9.252639 | Up | 7.63E-06 | 1.54E-05 |
| Oxtr         | 1167 | 0 | 21   | 0.001 | 0.598477 | 9.225153 | Up | 4.77E-07 | 1.03E-06 |
| LOC689621    | 453  | 0 | 8    | 0.001 | 0.585639 | 9.193868 | Up | 0.003906 | 0.006347 |
| Mael         | 1559 | 0 | 27.5 | 0.001 | 0.585175 | 9.192723 | Up | 7.45E-09 | 1.74E-08 |
| LOC288930    | 1197 | 0 | 21   | 0.001 | 0.584982 | 9.192248 | Up | 4.77E-07 | 1.03E-06 |
| Wee2         | 1674 | 0 | 29   | 0.001 | 0.583225 | 9.187908 | Up | 1.86E-09 | 4.43E-09 |
| B4galnt4     | 3546 | 0 | 62   | 0.001 | 0.581213 | 9.182924 | Up | 0        | 0        |
| LOC690352    | 976  | 0 | 17   | 0.001 | 0.58061  | 9.181427 | Up | 7.63E-06 | 1.54E-05 |
| LOC100362817 | 748  | 0 | 13   | 0.001 | 0.579049 | 9.177541 | Up | 0.000122 | 0.000225 |
| Tdrd5        | 3393 | 0 | 58.5 | 0.001 | 0.576828 | 9.171998 | Up | 0        | 0        |
| Oaz3         | 878  | 0 | 15   | 0.001 | 0.573465 | 9.163562 | Up | 3.05E-05 | 5.93E-05 |
| Tmed6        | 867  | 0 | 14.5 | 0.001 | 0.556815 | 9.121055 | Up | 6.10E-05 | 0.000116 |
| Zyg11a       | 2283 | 0 | 37.5 | 0.001 | 0.547418 | 9.096499 | Up | 7.28E-12 | 1.94E-11 |
| Ppp1r27      | 789  | 0 | 13   | 0.001 | 0.542114 | 9.082454 | Up | 0.000122 | 0.000224 |
| Cyp2c11      | 1856 | 0 | 30   | 0.001 | 0.541597 | 9.081077 | Up | 9.31E-10 | 2.24E-09 |



|              |      |   |       |          |          |          |    |          |          |
|--------------|------|---|-------|----------|----------|----------|----|----------|----------|
| RGD1564744   | 483  | 0 | 8     | 0.001    | 0.539947 | 9.076673 | Up | 0.003906 | 0.006326 |
| Slc13a3      | 3206 | 0 | 52    | 0.001    | 0.539836 | 9.076377 | Up | 2.22E-16 | 9.52E-16 |
| Gpbar1       | 990  | 0 | 16    | 0.001    | 0.537767 | 9.070836 | Up | 1.53E-05 | 3.03E-05 |
| Slc9a10      | 3902 | 0 | 63    | 0.001    | 0.536973 | 9.068706 | Up | 0        | 0        |
| Olr1587      | 939  | 0 | 15    | 0.001    | 0.532377 | 9.056305 | Up | 3.05E-05 | 5.93E-05 |
| Olr1387      | 936  | 0 | 15    | 0.001    | 0.530237 | 9.050494 | Up | 3.05E-05 | 5.93E-05 |
| Adam2        | 2431 | 0 | 38.5  | 0.001    | 0.529676 | 9.048966 | Up | 3.64E-12 | 1.03E-11 |
| Tal2         | 1170 | 0 | 18    | 0.001    | 0.519797 | 9.021805 | Up | 3.81E-06 | 7.85E-06 |
| Stk32b       | 1245 | 0 | 19    | 0.001    | 0.508795 | 8.99094  | Up | 1.91E-06 | 3.99E-06 |
| LOC100912184 | 864  | 0 | 13    | 0.001    | 0.507556 | 8.987424 | Up | 0.000122 | 0.000225 |
| LOC100911068 | 3264 | 0 | 49.5  | 0.001    | 0.505636 | 8.981956 | Up | 1.78E-15 | 7.51E-15 |
| Pou2f3       | 2407 | 0 | 37    | 0.001    | 0.505364 | 8.981179 | Up | 7.28E-12 | 1.94E-11 |
| Tmem40       | 609  | 0 | 9     | 0.001    | 0.500791 | 8.968064 | Up | 0.001953 | 0.003247 |
| Mrgprb2      | 939  | 0 | 14    | 0.001    | 0.49778  | 8.959364 | Up | 6.10E-05 | 0.000116 |
| RGD1564854   | 1146 | 0 | 17    | 0.001    | 0.492911 | 8.945183 | Up | 7.63E-06 | 1.54E-05 |
| Tnfrsf13b    | 817  | 0 | 12    | 0.001    | 0.492585 | 8.944228 | Up | 0.000244 | 0.00044  |
| RGD1561282   | 691  | 0 | 10    | 0.001    | 0.488377 | 8.93185  | Up | 0.000977 | 0.00166  |
| Clnk         | 1317 | 0 | 19    | 0.001    | 0.487813 | 8.930184 | Up | 1.91E-06 | 3.99E-06 |
| LOC367365    | 717  | 0 | 10.5  | 0.001    | 0.480769 | 8.9092   | Up | 0.000977 | 0.001661 |
| LOC100910205 | 1305 | 0 | 19    | 0.001    | 0.479884 | 8.906543 | Up | 1.91E-06 | 3.99E-06 |
| LOC100909622 | 1893 | 0 | 27    | 0.001    | 0.475723 | 8.893978 | Up | 7.45E-09 | 1.74E-08 |
| Grk1         | 2157 | 0 | 30.5  | 0.001    | 0.473968 | 8.888644 | Up | 9.31E-10 | 2.24E-09 |
| LOC100911567 | 813  | 0 | 11.5  | 0.001    | 0.470601 | 8.878359 | Up | 0.000488 | 0.000864 |
| Pbp2         | 1295 | 1 | 509.5 | 0.028075 | 13.14288 | 8.870798 | Up | 0.000575 | 0.001011 |
| Olr1585      | 939  | 0 | 13    | 0.001    | 0.467017 | 8.86733  | Up | 0.000122 | 0.000224 |

|              |      |   |      |       |          |          |    |          |          |
|--------------|------|---|------|-------|----------|----------|----|----------|----------|
| LOC686932    | 2643 | 0 | 37   | 0.001 | 0.466368 | 8.865327 | Up | 7.28E-12 | 1.94E-11 |
| LOC366782    | 780  | 0 | 11   | 0.001 | 0.466224 | 8.86488  | Up | 0.000488 | 0.000864 |
| Acrv1        | 827  | 0 | 11.5 | 0.001 | 0.462634 | 8.853727 | Up | 0.000488 | 0.000865 |
| Dgat2l6      | 1386 | 0 | 19   | 0.001 | 0.46093  | 8.848405 | Up | 1.91E-06 | 3.99E-06 |
| Far2         | 1783 | 0 | 24   | 0.001 | 0.448392 | 8.808618 | Up | 5.96E-08 | 1.34E-07 |
| Apol2        | 1298 | 0 | 17.5 | 0.001 | 0.447703 | 8.8064   | Up | 7.63E-06 | 1.54E-05 |
| Olr816       | 933  | 0 | 12.5 | 0.001 | 0.444893 | 8.797314 | Up | 0.000244 | 0.00044  |
| LOC100910615 | 981  | 0 | 13   | 0.001 | 0.443352 | 8.79231  | Up | 0.000122 | 0.000224 |
| Mrc1         | 5091 | 0 | 67   | 0.001 | 0.442215 | 8.788604 | Up | 0        | 0        |
| Pde6a        | 4104 | 0 | 54   | 0.001 | 0.440835 | 8.784096 | Up | 0        | 0        |
| LOC100911359 | 960  | 0 | 12.5 | 0.001 | 0.438943 | 8.77789  | Up | 0.000244 | 0.00044  |
| Ccl22        | 1770 | 0 | 23   | 0.001 | 0.438416 | 8.776158 | Up | 1.19E-07 | 2.65E-07 |
| Prss47       | 1373 | 0 | 18   | 0.001 | 0.438356 | 8.775959 | Up | 3.81E-06 | 7.86E-06 |
| LOC686143    | 987  | 0 | 13   | 0.001 | 0.43701  | 8.771521 | Up | 0.000122 | 0.000224 |
| Il1b         | 1339 | 0 | 17   | 0.001 | 0.424553 | 8.729799 | Up | 7.63E-06 | 1.54E-05 |
| Kb23         | 1668 | 0 | 21   | 0.001 | 0.423036 | 8.724635 | Up | 4.77E-07 | 1.03E-06 |
| Gpr55        | 960  | 0 | 12   | 0.001 | 0.42296  | 8.724379 | Up | 0.000244 | 0.000441 |
| LOC681107    | 825  | 0 | 10.5 | 0.001 | 0.422196 | 8.721768 | Up | 0.000977 | 0.001657 |
| Mc5r         | 1034 | 0 | 13   | 0.001 | 0.418886 | 8.710415 | Up | 0.000122 | 0.000224 |
| Fam209a      | 640  | 0 | 8    | 0.001 | 0.417335 | 8.705063 | Up | 0.003906 | 0.006324 |
| Ptprh        | 3407 | 0 | 41.5 | 0.001 | 0.406282 | 8.666337 | Up | 4.55E-13 | 1.54E-12 |
| LOC100910452 | 731  | 0 | 9    | 0.001 | 0.399974 | 8.643762 | Up | 0.001953 | 0.003238 |
| RGD1308742   | 1003 | 0 | 12   | 0.001 | 0.397649 | 8.635351 | Up | 0.000244 | 0.00044  |
| Ngp          | 1099 | 0 | 13   | 0.001 | 0.397387 | 8.634402 | Up | 0.000122 | 0.000224 |
| Efcab8       | 3435 | 0 | 41   | 0.001 | 0.396145 | 8.629886 | Up | 4.55E-13 | 1.54E-12 |

|              |      |   |      |       |          |          |    |          |          |
|--------------|------|---|------|-------|----------|----------|----|----------|----------|
| Muc3a        | 1772 | 0 | 21   | 0.001 | 0.393128 | 8.618855 | Up | 4.77E-07 | 1.03E-06 |
| LOC100360320 | 861  | 0 | 10   | 0.001 | 0.391949 | 8.614523 | Up | 0.000977 | 0.001659 |
| Tmem156      | 1534 | 0 | 18   | 0.001 | 0.391762 | 8.613833 | Up | 3.81E-06 | 7.86E-06 |
| RGD1560880   | 761  | 0 | 9    | 0.001 | 0.391303 | 8.612141 | Up | 0.001953 | 0.003245 |
| Gpr115       | 2214 | 0 | 26   | 0.001 | 0.387198 | 8.596928 | Up | 1.49E-08 | 3.43E-08 |
| Gzma         | 786  | 0 | 9    | 0.001 | 0.385727 | 8.591436 | Up | 0.001953 | 0.003237 |
| Nckap5       | 5590 | 0 | 64.5 | 0.001 | 0.384508 | 8.586869 | Up | 0        | 0        |
| LOC100911005 | 680  | 0 | 8    | 0.001 | 0.383521 | 8.583162 | Up | 0.003906 | 0.006332 |
| Serpib3a     | 1673 | 0 | 19   | 0.001 | 0.380783 | 8.572824 | Up | 1.91E-06 | 3.99E-06 |
| Nts          | 798  | 0 | 9    | 0.001 | 0.379927 | 8.569577 | Up | 0.001953 | 0.003241 |
| Robo4        | 2886 | 0 | 32   | 0.001 | 0.370193 | 8.532135 | Up | 2.33E-10 | 5.71E-10 |
| Grik4        | 3312 | 0 | 37   | 0.001 | 0.368904 | 8.527103 | Up | 7.28E-12 | 1.94E-11 |
| Tigit        | 726  | 0 | 8    | 0.001 | 0.367899 | 8.523165 | Up | 0.003906 | 0.006336 |
| Cd40         | 1272 | 0 | 14   | 0.001 | 0.367465 | 8.521463 | Up | 6.10E-05 | 0.000116 |
| LOC299282    | 1882 | 0 | 20.5 | 0.001 | 0.36678  | 8.518771 | Up | 9.54E-07 | 2.03E-06 |
| Vom1r77      | 918  | 0 | 10   | 0.001 | 0.365652 | 8.514326 | Up | 0.000977 | 0.00166  |
| Hsd17b3      | 1111 | 0 | 12   | 0.001 | 0.360614 | 8.49431  | Up | 0.000244 | 0.000441 |
| Fam132b      | 1026 | 0 | 11   | 0.001 | 0.36058  | 8.494175 | Up | 0.000488 | 0.000865 |
| Prss39       | 1595 | 0 | 17   | 0.001 | 0.359797 | 8.491039 | Up | 7.63E-06 | 1.54E-05 |
| Capn11       | 2650 | 0 | 28.5 | 0.001 | 0.359575 | 8.49015  | Up | 3.73E-09 | 8.78E-09 |
| Dcdc2b       | 1255 | 0 | 13.5 | 0.001 | 0.3595   | 8.489846 | Up | 0.000122 | 0.000224 |
| Tspan12      | 2563 | 0 | 27   | 0.001 | 0.352768 | 8.462575 | Up | 7.45E-09 | 1.74E-08 |
| Fam20a       | 1626 | 0 | 17   | 0.001 | 0.349616 | 8.449628 | Up | 7.63E-06 | 1.54E-05 |
| Rnase9       | 1279 | 0 | 13   | 0.001 | 0.340054 | 8.409618 | Up | 0.000122 | 0.000224 |
| LOC679368    | 2001 | 0 | 20   | 0.001 | 0.3355   | 8.390171 | Up | 9.54E-07 | 2.03E-06 |

|              |      |   |        |          |          |          |    |          |          |
|--------------|------|---|--------|----------|----------|----------|----|----------|----------|
| Nkg7         | 813  | 0 | 8      | 0.001    | 0.335172 | 8.388757 | Up | 0.003906 | 0.006334 |
| Slc24a4      | 2295 | 0 | 23     | 0.001    | 0.334988 | 8.387964 | Up | 1.19E-07 | 2.65E-07 |
| LOC100912239 | 1008 | 0 | 10     | 0.001    | 0.333004 | 8.379396 | Up | 0.000977 | 0.00166  |
| LOC309220    | 939  | 0 | 9.5    | 0.001    | 0.328673 | 8.360511 | Up | 0.001953 | 0.003246 |
| LOC685680    | 1008 | 0 | 10     | 0.001    | 0.327647 | 8.355998 | Up | 0.000977 | 0.001657 |
| Nlrp6        | 2906 | 1 | 341.5  | 0.012116 | 3.918047 | 8.337049 | Up | 0.000575 | 0.001004 |
| Snap91       | 3419 | 0 | 33     | 0.001    | 0.321458 | 8.328486 | Up | 1.16E-10 | 2.89E-10 |
| Ereg         | 834  | 0 | 8      | 0.001    | 0.320257 | 8.323087 | Up | 0.003906 | 0.006335 |
| RGD1311676   | 861  | 0 | 8      | 0.001    | 0.314396 | 8.296437 | Up | 0.003906 | 0.006334 |
| Sox30        | 2013 | 0 | 19     | 0.001    | 0.312444 | 8.287453 | Up | 1.91E-06 | 3.99E-06 |
| LOC100910040 | 1956 | 1 | 328    | 0.018001 | 5.601827 | 8.281683 | Up | 0.000575 | 0.001006 |
| LOC100360712 | 921  | 0 | 8.5    | 0.001    | 0.309596 | 8.274243 | Up | 0.003906 | 0.006347 |
| Stmn4        | 1333 | 2 | 661    | 0.053688 | 16.54012 | 8.267147 | Up | 0.000115 | 0.000214 |
| Fam50b       | 1316 | 0 | 12     | 0.001    | 0.305807 | 8.256477 | Up | 0.000244 | 0.00044  |
| LOC680549    | 3228 | 0 | 30     | 0.001    | 0.305268 | 8.253931 | Up | 9.31E-10 | 2.24E-09 |
| Arrdc4       | 949  | 5 | 1621.5 | 0.189136 | 57.10344 | 8.238014 | Up | 2.76E-05 | 5.41E-05 |
| Actl6b       | 1562 | 0 | 14     | 0.001    | 0.299818 | 8.227942 | Up | 6.10E-05 | 0.000116 |
| LOC100911650 | 1234 | 0 | 11     | 0.001    | 0.299801 | 8.227864 | Up | 0.000488 | 0.000865 |
| RGD1309410   | 901  | 0 | 8      | 0.001    | 0.296442 | 8.211607 | Up | 0.003906 | 0.00634  |
| LOC100912860 | 1224 | 0 | 11     | 0.001    | 0.296368 | 8.211247 | Up | 0.000488 | 0.000865 |
| Rbm11        | 2501 | 0 | 22     | 0.001    | 0.295846 | 8.208701 | Up | 2.38E-07 | 5.23E-07 |
| P2ry12       | 1254 | 0 | 11     | 0.001    | 0.293585 | 8.197632 | Up | 0.000488 | 0.000865 |
| LOC690984    | 924  | 0 | 8      | 0.001    | 0.289063 | 8.175242 | Up | 0.003906 | 0.006331 |
| Hs6st2       | 2394 | 0 | 21     | 0.001    | 0.288731 | 8.173584 | Up | 4.77E-07 | 1.03E-06 |
| Gprin2       | 1601 | 0 | 14     | 0.001    | 0.288579 | 8.172823 | Up | 6.10E-05 | 0.000116 |

|              |      |   |      |          |          |          |    |          |          |
|--------------|------|---|------|----------|----------|----------|----|----------|----------|
| LOC690309    | 2232 | 0 | 19   | 0.001    | 0.286223 | 8.160995 | Up | 1.91E-06 | 3.99E-06 |
| Plek         | 1671 | 0 | 14   | 0.001    | 0.281876 | 8.138919 | Up | 6.10E-05 | 0.000116 |
| Cx3cl1       | 3044 | 1 | 297  | 0.011567 | 3.257222 | 8.13749  | Up | 0.000575 | 0.00101  |
| RGD1305725   | 1370 | 0 | 11.5 | 0.001    | 0.28124  | 8.135656 | Up | 0.000488 | 0.000864 |
| Naip2        | 5990 | 0 | 50   | 0.001    | 0.277937 | 8.118612 | Up | 8.88E-16 | 3.77E-15 |
| LOC100360779 | 3994 | 0 | 33   | 0.001    | 0.276531 | 8.111298 | Up | 1.16E-10 | 2.89E-10 |
| LOC100362038 | 1104 | 0 | 9    | 0.001    | 0.274621 | 8.101297 | Up | 0.001953 | 0.003247 |
| RGD1565143   | 1093 | 0 | 9    | 0.001    | 0.272444 | 8.089815 | Up | 0.001953 | 0.003236 |
| LOC100910397 | 969  | 0 | 8    | 0.001    | 0.270066 | 8.07717  | Up | 0.003906 | 0.006327 |
| RGD1562655   | 3977 | 0 | 32   | 0.001    | 0.269544 | 8.074379 | Up | 2.33E-10 | 5.71E-10 |
| Echdc2       | 1390 | 0 | 11   | 0.001    | 0.266155 | 8.056121 | Up | 0.000488 | 0.000865 |
| Ust5r        | 2079 | 0 | 16.5 | 0.001    | 0.265624 | 8.053242 | Up | 1.53E-05 | 3.03E-05 |
| Fam124b      | 1371 | 0 | 11   | 0.001    | 0.263278 | 8.040445 | Up | 0.000488 | 0.000864 |
| Avpr1b       | 1516 | 0 | 12   | 0.001    | 0.263088 | 8.039403 | Up | 0.000244 | 0.00044  |
| Capza3       | 1222 | 0 | 9.5  | 0.001    | 0.262868 | 8.038195 | Up | 0.001953 | 0.003239 |
| Gabrg2       | 1401 | 0 | 11   | 0.001    | 0.261495 | 8.030641 | Up | 0.000488 | 0.000865 |
| Cd96         | 2079 | 0 | 16   | 0.001    | 0.257811 | 8.01017  | Up | 1.53E-05 | 3.03E-05 |
| Lbx1         | 1164 | 0 | 9    | 0.001    | 0.257372 | 8.007713 | Up | 0.001953 | 0.003242 |
| Etv2         | 1040 | 0 | 8    | 0.001    | 0.256822 | 8.004623 | Up | 0.003906 | 0.006346 |
| Trim63       | 1861 | 1 | 271  | 0.01892  | 4.857456 | 8.004158 | Up | 0.000575 | 0.001004 |
| RGD1562063   | 1443 | 0 | 11   | 0.001    | 0.252637 | 7.980921 | Up | 0.000488 | 0.000865 |
| LOC100911572 | 1216 | 0 | 9    | 0.001    | 0.250807 | 7.970435 | Up | 0.001953 | 0.003236 |
| 12-Sep       | 1320 | 0 | 10   | 0.001    | 0.250203 | 7.966955 | Up | 0.000977 | 0.001661 |
| C5ar1        | 1772 | 0 | 13   | 0.001    | 0.249508 | 7.962944 | Up | 0.000122 | 0.000224 |
| LOC689946    | 1362 | 0 | 10   | 0.001    | 0.247774 | 7.952881 | Up | 0.000977 | 0.001657 |

|              |      |   |      |          |          |          |    |          |          |
|--------------|------|---|------|----------|----------|----------|----|----------|----------|
| RGD1564409   | 1482 | 0 | 11   | 0.001    | 0.244774 | 7.935305 | Up | 0.000488 | 0.000865 |
| RGD1559459   | 2704 | 0 | 20   | 0.001    | 0.244281 | 7.932398 | Up | 9.54E-07 | 2.03E-06 |
| LOC100909648 | 1266 | 0 | 9    | 0.001    | 0.240902 | 7.9123   | Up | 0.001953 | 0.003244 |
| Nfe2         | 1684 | 0 | 12   | 0.001    | 0.240049 | 7.907183 | Up | 0.000244 | 0.00044  |
| Ankk1        | 2412 | 0 | 17   | 0.001    | 0.237925 | 7.894365 | Up | 7.63E-06 | 1.55E-05 |
| Apoa4        | 1423 | 0 | 10   | 0.001    | 0.235888 | 7.881956 | Up | 0.000977 | 0.001658 |
| MGC116197    | 1431 | 0 | 10   | 0.001    | 0.232053 | 7.858311 | Up | 0.000977 | 0.001661 |
| Aoah         | 1747 | 0 | 12   | 0.001    | 0.231392 | 7.854195 | Up | 0.000244 | 0.00044  |
| Matn3        | 2003 | 1 | 252  | 0.018151 | 4.196394 | 7.852949 | Up | 0.000575 | 0.001008 |
| Trpv3        | 3028 | 0 | 21   | 0.001    | 0.230655 | 7.849592 | Up | 4.77E-07 | 1.03E-06 |
| LOC100912561 | 1158 | 0 | 8    | 0.001    | 0.229097 | 7.839815 | Up | 0.003906 | 0.006342 |
| Mboat4       | 1308 | 0 | 9    | 0.001    | 0.229038 | 7.839441 | Up | 0.001953 | 0.003238 |
| LOC686581    | 1167 | 0 | 8    | 0.001    | 0.228873 | 7.838402 | Up | 0.003906 | 0.006344 |
| Trim50       | 1452 | 0 | 10   | 0.001    | 0.228077 | 7.833378 | Up | 0.000977 | 0.001661 |
| RGD1560110   | 1299 | 0 | 9    | 0.001    | 0.227853 | 7.83196  | Up | 0.001953 | 0.003245 |
| Fam163b      | 1313 | 0 | 9    | 0.001    | 0.226795 | 7.825242 | Up | 0.001953 | 0.003247 |
| Lipk         | 2070 | 0 | 14   | 0.001    | 0.226674 | 7.824476 | Up | 6.10E-05 | 0.000116 |
| Kiss1r       | 1188 | 0 | 8    | 0.001    | 0.226342 | 7.822362 | Up | 0.003906 | 0.006331 |
| Rac2         | 1325 | 0 | 9    | 0.001    | 0.226099 | 7.820811 | Up | 0.001953 | 0.00324  |
| Ank1         | 5124 | 0 | 34.5 | 0.001    | 0.225936 | 7.819769 | Up | 5.82E-11 | 1.46E-10 |
| Mmp20        | 3284 | 0 | 22   | 0.001    | 0.224759 | 7.812238 | Up | 2.38E-07 | 5.23E-07 |
| St8sia6      | 1197 | 0 | 8    | 0.001    | 0.223137 | 7.801783 | Up | 0.003906 | 0.006345 |
| Arg1         | 1507 | 0 | 10   | 0.001    | 0.222739 | 7.799213 | Up | 0.000977 | 0.001659 |
| RGD1561442   | 4371 | 0 | 29   | 0.001    | 0.220892 | 7.787195 | Up | 1.86E-09 | 4.43E-09 |
| Slc17a1      | 1848 | 0 | 12   | 0.001    | 0.220694 | 7.785902 | Up | 0.000244 | 0.00044  |

|              |      |     |      |          |          |          |    |          |          |
|--------------|------|-----|------|----------|----------|----------|----|----------|----------|
| Ces2c        | 1902 | 2   | 476  | 0.03823  | 8.375827 | 7.775385 | Up | 0.000115 | 0.000214 |
| LOC367746    | 1385 | 0   | 9    | 0.001    | 0.218904 | 7.774152 | Up | 0.001953 | 0.003235 |
| LOC687071    | 1518 | 0   | 10   | 0.001    | 0.217568 | 7.765322 | Up | 0.000977 | 0.001657 |
| Hoxb2        | 1657 | 0   | 11   | 0.001    | 0.215664 | 7.752639 | Up | 0.000488 | 0.000864 |
| Btn3a2       | 1770 | 0   | 11.5 | 0.001    | 0.212598 | 7.731983 | Up | 0.000488 | 0.000865 |
| Prps111      | 1691 | 0   | 10.5 | 0.001    | 0.207576 | 7.697498 | Up | 0.000977 | 0.001658 |
| Ccdc154      | 2391 | 0   | 15   | 0.001    | 0.207571 | 7.69746  | Up | 3.05E-05 | 5.93E-05 |
| Lca5l        | 2086 | 0   | 13   | 0.001    | 0.20591  | 7.68587  | Up | 0.000122 | 0.000225 |
| Asic3        | 1602 | 0   | 10   | 0.001    | 0.205036 | 7.679734 | Up | 0.000977 | 0.001662 |
| Esr1         | 2090 | 0   | 13   | 0.001    | 0.203793 | 7.670964 | Up | 0.000122 | 0.000224 |
| Kirrel2      | 3364 | 0   | 20.5 | 0.001    | 0.203591 | 7.669529 | Up | 9.54E-07 | 2.03E-06 |
| LOC500827    | 1981 | 0   | 12   | 0.001    | 0.202242 | 7.65994  | Up | 0.000244 | 0.00044  |
| Klhdc7a      | 2322 | 0   | 14   | 0.001    | 0.202074 | 7.658739 | Up | 6.10E-05 | 0.000116 |
| LOC683506    | 2338 | 0   | 14   | 0.001    | 0.199921 | 7.643286 | Up | 6.10E-05 | 0.000116 |
| Btnl8        | 1933 | 0   | 11.5 | 0.001    | 0.199792 | 7.642357 | Up | 0.000488 | 0.000865 |
| LOC100911250 | 2694 | 0   | 16   | 0.001    | 0.19762  | 7.626587 | Up | 1.53E-05 | 3.03E-05 |
| Gys2         | 2386 | 0   | 14   | 0.001    | 0.197408 | 7.625037 | Up | 6.10E-05 | 0.000116 |
| Col8a2       | 4063 | 0   | 24   | 0.001    | 0.196329 | 7.617127 | Up | 5.96E-08 | 1.34E-07 |
| Hck          | 2081 | 0   | 12   | 0.001    | 0.195119 | 7.608208 | Up | 0.000244 | 0.000441 |
| Hpca         | 1561 | 0   | 9    | 0.001    | 0.193069 | 7.592976 | Up | 0.001953 | 0.003237 |
| Stac3        | 1546 | 0   | 9    | 0.001    | 0.192614 | 7.589569 | Up | 0.001953 | 0.003237 |
| Ankrd35      | 3207 | 0   | 18   | 0.001    | 0.189075 | 7.562813 | Up | 3.81E-06 | 7.85E-06 |
| Lep          | 3290 | 1   | 197  | 0.010702 | 1.996687 | 7.543575 | Up | 0.000575 | 0.001004 |
| Bcl2a1       | 699  | 0.5 | 99   | 0.025186 | 4.696414 | 7.542803 | Up | 0        | 0        |
| Asb2         | 2512 | 0   | 14   | 0.001    | 0.186073 | 7.539725 | Up | 6.10E-05 | 0.000116 |

|              |      |     |      |          |          |          |    |          |          |
|--------------|------|-----|------|----------|----------|----------|----|----------|----------|
| Gstt3        | 1785 | 0   | 10   | 0.001    | 0.186033 | 7.539411 | Up | 0.000977 | 0.00166  |
| Fam71a       | 2181 | 0   | 12   | 0.001    | 0.183696 | 7.521179 | Up | 0.000244 | 0.00044  |
| Slfn14       | 2718 | 0   | 15   | 0.001    | 0.183261 | 7.517752 | Up | 3.05E-05 | 5.93E-05 |
| Gpr39        | 1575 | 0.5 | 96.5 | 0.011178 | 2.04589  | 7.51596  | Up | 0        | 0        |
| LOC100911827 | 1452 | 0   | 8    | 0.001    | 0.18271  | 7.513409 | Up | 0.003906 | 0.006338 |
| Ly6b         | 905  | 1   | 192  | 0.038906 | 7.087147 | 7.509074 | Up | 0.000575 | 0.001005 |
| Bend5        | 1834 | 0   | 10   | 0.001    | 0.180081 | 7.4925   | Up | 0.000977 | 0.001659 |
| Il1rapl1     | 2165 | 0   | 12   | 0.001    | 0.180065 | 7.492376 | Up | 0.000244 | 0.00044  |
| Gata1        | 1863 | 0   | 10   | 0.001    | 0.178244 | 7.477707 | Up | 0.000977 | 0.001662 |
| B3gat1       | 2090 | 0   | 11   | 0.001    | 0.175289 | 7.453595 | Up | 0.000488 | 0.000863 |
| Htr7         | 1493 | 0   | 8    | 0.001    | 0.174075 | 7.443567 | Up | 0.003906 | 0.006343 |
| Pabpc3       | 3150 | 0   | 16.5 | 0.001    | 0.173026 | 7.434846 | Up | 1.53E-05 | 3.03E-05 |
| Slc9b2       | 2011 | 0.5 | 91   | 0.008754 | 1.50363  | 7.424242 | Up | 0        | 0        |
| Efcab6       | 4724 | 0   | 24   | 0.001    | 0.168477 | 7.396404 | Up | 5.96E-08 | 1.34E-07 |
| Kif4b        | 2982 | 0   | 15   | 0.001    | 0.16764  | 7.389222 | Up | 3.05E-05 | 5.93E-05 |
| Il10ra       | 1814 | 0   | 9    | 0.001    | 0.16515  | 7.367629 | Up | 0.001953 | 0.003242 |
| Chrb3        | 2644 | 0   | 13   | 0.001    | 0.164496 | 7.361913 | Up | 0.000122 | 0.000225 |
| Kremen2      | 1936 | 0   | 9.5  | 0.001    | 0.162668 | 7.345784 | Up | 0.001953 | 0.00324  |
| Fbl1         | 1644 | 0   | 8    | 0.001    | 0.162466 | 7.343996 | Up | 0.003906 | 0.006345 |
| Mmp21        | 1854 | 0   | 9    | 0.001    | 0.161586 | 7.336162 | Up | 0.001953 | 0.003235 |
| Tekt3        | 1761 | 0   | 8.5  | 0.001    | 0.161407 | 7.33456  | Up | 0.003906 | 0.006326 |
| LOC689458    | 3573 | 0   | 17   | 0.001    | 0.158599 | 7.309244 | Up | 7.63E-06 | 1.54E-05 |
| Lrrc6        | 1698 | 0   | 8    | 0.001    | 0.15836  | 7.30706  | Up | 0.003906 | 0.006342 |
| Vom2r66      | 1671 | 0   | 8    | 0.001    | 0.157687 | 7.300917 | Up | 0.003906 | 0.006328 |
| Fli1         | 1871 | 0   | 9    | 0.001    | 0.157232 | 7.296751 | Up | 0.001953 | 0.003239 |



|              |      |     |      |          |          |          |    |          |          |
|--------------|------|-----|------|----------|----------|----------|----|----------|----------|
| LOC689599    | 1722 | 0   | 8    | 0.001    | 0.157198 | 7.296437 | Up | 0.003906 | 0.006329 |
| RGD1564259   | 5736 | 0   | 27   | 0.001    | 0.156999 | 7.294608 | Up | 7.45E-09 | 1.74E-08 |
| Cytip        | 1694 | 0   | 8    | 0.001    | 0.155546 | 7.281194 | Up | 0.003906 | 0.006333 |
| LOC685081    | 1736 | 0   | 8    | 0.001    | 0.154893 | 7.27513  | Up | 0.003906 | 0.006341 |
| LOC317471    | 2158 | 0   | 10   | 0.001    | 0.153878 | 7.26564  | Up | 0.000977 | 0.001662 |
| LOC499971    | 2583 | 0   | 12   | 0.001    | 0.153713 | 7.264099 | Up | 0.000244 | 0.00044  |
| Tmie         | 2599 | 0   | 12   | 0.001    | 0.15346  | 7.261716 | Up | 0.000244 | 0.00044  |
| Rhbd3        | 3750 | 0   | 17   | 0.001    | 0.152074 | 7.248626 | Up | 7.63E-06 | 1.54E-05 |
| LOC294165    | 2559 | 0   | 11.5 | 0.001    | 0.149863 | 7.227496 | Up | 0.000488 | 0.000864 |
| Zfp286a      | 2961 | 0   | 13   | 0.001    | 0.147494 | 7.204509 | Up | 0.000122 | 0.000224 |
| Ttc39d       | 2309 | 0   | 10   | 0.001    | 0.144594 | 7.175866 | Up | 0.000977 | 0.001657 |
| RGD1559958   | 1939 | 0   | 8.5  | 0.001    | 0.144269 | 7.172618 | Up | 0.003906 | 0.006345 |
| LOC100359988 | 2121 | 0   | 9    | 0.001    | 0.143791 | 7.167833 | Up | 0.001953 | 0.00324  |
| Cldn2        | 3052 | 0   | 13   | 0.001    | 0.141326 | 7.142888 | Up | 0.000122 | 0.000224 |
| Ankar        | 4398 | 0   | 18.5 | 0.001    | 0.141156 | 7.141151 | Up | 3.81E-06 | 7.86E-06 |
| Havcr1       | 2538 | 0   | 10.5 | 0.001    | 0.138302 | 7.111683 | Up | 0.000977 | 0.001659 |
| Neil3        | 1975 | 0   | 8    | 0.001    | 0.137972 | 7.108232 | Up | 0.003906 | 0.006328 |
| Aldh8a1      | 1499 | 1.5 | 220  | 0.035616 | 4.898198 | 7.103589 | Up | 0.000575 | 0.00101  |
| Prnd         | 537  | 0.5 | 73   | 0.032784 | 4.501744 | 7.101357 | Up | 0        | 0        |
| Abcg5        | 2470 | 0   | 10   | 0.001    | 0.135898 | 7.086381 | Up | 0.000977 | 0.001657 |
| RGD1564285   | 1980 | 0   | 8    | 0.001    | 0.135805 | 7.085396 | Up | 0.003906 | 0.00633  |
| LOC100910423 | 2219 | 0   | 9    | 0.001    | 0.135007 | 7.076894 | Up | 0.001953 | 0.003243 |
| Best2        | 2006 | 0.5 | 70.5 | 0.008776 | 1.178525 | 7.069183 | Up | 0        | 0        |
| Ptchd1       | 2676 | 0   | 11   | 0.001    | 0.134213 | 7.068383 | Up | 0.000488 | 0.000864 |
| Paqr9        | 2297 | 0   | 9    | 0.001    | 0.133557 | 7.061317 | Up | 0.001953 | 0.003246 |

|            |      |      |        |          |          |          |    |          |          |
|------------|------|------|--------|----------|----------|----------|----|----------|----------|
| LOC680874  | 1253 | 1    | 140    | 0.0281   | 3.728933 | 7.052029 | Up | 0.000575 | 0.001004 |
| Sypl2      | 3403 | 0    | 13.5   | 0.001    | 0.132052 | 7.044959 | Up | 0.000122 | 0.000224 |
| Alpk2      | 6534 | 0    | 26     | 0.001    | 0.132026 | 7.044677 | Up | 1.49E-08 | 3.43E-08 |
| Vom2r45    | 3001 | 0    | 12     | 0.001    | 0.131703 | 7.041147 | Up | 0.000244 | 0.00044  |
| Trpc7      | 3055 | 0    | 12     | 0.001    | 0.131143 | 7.034997 | Up | 0.000244 | 0.00044  |
| Tnfrsf11a  | 2718 | 0    | 10.5   | 0.001    | 0.13113  | 7.034856 | Up | 0.000977 | 0.001658 |
| Phlda2     | 642  | 2    | 284.5  | 0.113261 | 14.77772 | 7.027633 | Up | 0.000115 | 0.000214 |
| Nodal      | 2034 | 0    | 8      | 0.001    | 0.129545 | 7.017309 | Up | 0.003906 | 0.006341 |
| Cd83       | 2119 | 4    | 556.5  | 0.067547 | 8.746724 | 7.016699 | Up | 4.59E-05 | 8.81E-05 |
| Vom2r58    | 2574 | 0    | 10     | 0.001    | 0.129358 | 7.015228 | Up | 0.000977 | 0.001659 |
| Ly75       | 5974 | 0    | 23     | 0.001    | 0.128992 | 7.011135 | Up | 1.19E-07 | 2.65E-07 |
| RGD1565356 | 2107 | 0    | 8      | 0.001    | 0.128474 | 7.005332 | Up | 0.003906 | 0.006339 |
| Fap        | 2293 | 0    | 9      | 0.001    | 0.128295 | 7.003324 | Up | 0.001953 | 0.003246 |
| Pitx1      | 2287 | 0    | 9      | 0.001    | 0.127845 | 6.998249 | Up | 0.001953 | 0.003243 |
| Kcns3      | 2370 | 0    | 9      | 0.001    | 0.127165 | 6.990559 | Up | 0.001953 | 0.003244 |
| Vipr1      | 4945 | 0    | 19     | 0.001    | 0.126643 | 6.984622 | Up | 1.91E-06 | 3.99E-06 |
| Trim72     | 2363 | 1.5  | 200.5  | 0.022593 | 2.833054 | 6.970315 | Up | 0.000575 | 0.001009 |
| Itih3      | 2783 | 0    | 10.5   | 0.001    | 0.125157 | 6.967593 | Up | 0.000977 | 0.001662 |
| Fam163a    | 3908 | 0    | 15     | 0.001    | 0.125154 | 6.96756  | Up | 3.05E-05 | 5.93E-05 |
| Hsh2d      | 2176 | 2    | 266.5  | 0.032889 | 4.089171 | 6.958059 | Up | 0.000115 | 0.000214 |
| Amn        | 1759 | 0.5  | 65.5   | 0.010008 | 1.239901 | 6.95286  | Up | 0        | 0        |
| Gria1      | 2992 | 0    | 11     | 0.001    | 0.123648 | 6.950096 | Up | 0.000488 | 0.000864 |
| Myom1      | 5551 | 10   | 1312.5 | 0.063843 | 7.883163 | 6.948106 | Up | 1.61E-06 | 3.40E-06 |
| Zfp458     | 3170 | 26.5 | 3451   | 0.297235 | 36.32618 | 6.933262 | Up | 6.87E-11 | 1.72E-10 |
| lqub       | 3058 | 11.5 | 1501.5 | 0.135036 | 16.37654 | 6.92214  | Up | 8.84E-07 | 1.89E-06 |

|              |      |       |       |          |          |          |    |          |          |
|--------------|------|-------|-------|----------|----------|----------|----|----------|----------|
| Scn5a        | 8468 | 3     | 386   | 0.012609 | 1.522627 | 6.915921 | Up | 7.36E-05 | 0.000139 |
| Fstl5        | 1160 | 3     | 383   | 0.092049 | 11.02418 | 6.904061 | Up | 7.36E-05 | 0.000139 |
| Kprp         | 2815 | 0     | 10    | 0.001    | 0.119243 | 6.897757 | Up | 0.000977 | 0.001657 |
| Dscaml1      | 6929 | 0     | 25    | 0.001    | 0.119032 | 6.895201 | Up | 2.98E-08 | 6.78E-08 |
| Apba1        | 3681 | 0     | 13    | 0.001    | 0.118644 | 6.890496 | Up | 0.000122 | 0.000224 |
| Bnc1         | 4454 | 0     | 16    | 0.001    | 0.118318 | 6.886527 | Up | 1.53E-05 | 3.03E-05 |
| Kcnj11       | 3051 | 0     | 11    | 0.001    | 0.117127 | 6.87193  | Up | 0.000488 | 0.000863 |
| Ace3         | 2583 | 0     | 9     | 0.001    | 0.116679 | 6.866399 | Up | 0.001953 | 0.003237 |
| LOC500797    | 2571 | 0     | 9     | 0.001    | 0.116523 | 6.864474 | Up | 0.001953 | 0.003238 |
| Cers3        | 2825 | 0     | 10    | 0.001    | 0.116272 | 6.861358 | Up | 0.000977 | 0.001658 |
| Gpr61        | 3368 | 0     | 12    | 0.001    | 0.115749 | 6.854851 | Up | 0.000244 | 0.00044  |
| LOC302999    | 2126 | 0.5   | 63    | 0.00855  | 0.982158 | 6.843805 | Up | 0        | 0        |
| Pmfbp1       | 3312 | 0     | 11    | 0.001    | 0.112245 | 6.810506 | Up | 0.000488 | 0.000864 |
| Ccdc125      | 2438 | 1     | 117.5 | 0.014442 | 1.610747 | 6.801307 | Up | 0.000575 | 0.00101  |
| RGD1624205   | 8935 | 0     | 30    | 0.001    | 0.11089  | 6.792988 | Up | 9.31E-10 | 2.24E-09 |
| Ampd1        | 2275 | 2     | 233.5 | 0.030954 | 3.42258  | 6.78883  | Up | 0.000115 | 0.000214 |
| Csf2         | 441  | 116.5 | 13800 | 9.457491 | 1044.9   | 6.787692 | Up | 9.68E-14 | 3.75E-13 |
| LOC100912082 | 2718 | 0     | 9     | 0.001    | 0.110221 | 6.784258 | Up | 0.001953 | 0.003244 |
| Vom2r47      | 2475 | 0     | 8     | 0.001    | 0.107917 | 6.753778 | Up | 0.003906 | 0.00634  |
| Trim43a      | 1356 | 1     | 113.5 | 0.025966 | 2.799523 | 6.752418 | Up | 0.000575 | 0.001003 |
| Ccdc135      | 2813 | 0     | 9     | 0.001    | 0.107139 | 6.743337 | Up | 0.001953 | 0.003243 |
| Slc5a1       | 2522 | 0     | 8     | 0.001    | 0.10662  | 6.736328 | Up | 0.003906 | 0.006343 |
| Vom2r9       | 2601 | 0     | 8     | 0.001    | 0.104765 | 6.711018 | Up | 0.003906 | 0.006335 |
| Cdh8         | 3123 | 0     | 10    | 0.001    | 0.104024 | 6.700776 | Up | 0.000977 | 0.00166  |
| Colq         | 2645 | 6.5   | 717   | 0.088261 | 9.059941 | 6.681577 | Up | 1.62E-05 | 3.20E-05 |

|              |      |     |       |          |          |          |    |          |          |
|--------------|------|-----|-------|----------|----------|----------|----|----------|----------|
| Aoc3         | 3961 | 4   | 436   | 0.036136 | 3.673403 | 6.667554 | Up | 4.59E-05 | 8.83E-05 |
| Trpc5        | 2925 | 0   | 9     | 0.001    | 0.100575 | 6.652124 | Up | 0.001953 | 0.003243 |
| Lax1         | 2241 | 2   | 214   | 0.031935 | 3.1858   | 6.640371 | Up | 0.000115 | 0.000214 |
| LOC100360041 | 2683 | 0   | 8     | 0.001    | 0.099551 | 6.637359 | Up | 0.003906 | 0.006325 |
| Slc18a1      | 2357 | 1   | 104   | 0.014938 | 1.469337 | 6.619997 | Up | 0.000575 | 0.00101  |
| Trpc3        | 3420 | 0   | 10    | 0.001    | 0.098149 | 6.616896 | Up | 0.000977 | 0.001657 |
| Zscan10      | 2748 | 0   | 8     | 0.001    | 0.097851 | 6.612515 | Up | 0.003906 | 0.006327 |
| LOC689074    | 4141 | 0   | 12    | 0.001    | 0.09675  | 6.59619  | Up | 0.000244 | 0.00044  |
| Pram1        | 2279 | 1   | 101.5 | 0.01545  | 1.491493 | 6.593037 | Up | 0.000575 | 0.001006 |
| Adra2b       | 4047 | 5   | 510.5 | 0.043643 | 4.213175 | 6.59302  | Up | 2.76E-05 | 5.40E-05 |
| Grm3         | 3384 | 0   | 10    | 0.001    | 0.096533 | 6.592951 | Up | 0.000977 | 0.001661 |
| Serpina9     | 1680 | 1   | 104.5 | 0.021641 | 2.084507 | 6.589804 | Up | 0.000575 | 0.001009 |
| Ccdc153      | 1392 | 0.5 | 53    | 0.013059 | 1.256969 | 6.588744 | Up | 0        | 0        |
| Mttp         | 3997 | 0   | 11.5  | 0.001    | 0.095721 | 6.580769 | Up | 0.000488 | 0.000865 |
| LOC690507    | 1396 | 1   | 103.5 | 0.026043 | 2.4737   | 6.569606 | Up | 0.000575 | 0.001005 |
| Wdr93        | 2082 | 1   | 100.5 | 0.016912 | 1.60102  | 6.564841 | Up | 0.000575 | 0.001006 |
| Gpr179       | 6930 | 0   | 19.5  | 0.001    | 0.0944   | 6.560717 | Up | 1.91E-06 | 3.99E-06 |
| Aldh1l2      | 3502 | 0   | 10    | 0.001    | 0.094308 | 6.559314 | Up | 0.000977 | 0.00166  |
| Il6          | 1046 | 23  | 2294  | 0.78408  | 73.2401  | 6.54549  | Up | 4.68E-10 | 1.13E-09 |
| RGD1566124   | 2905 | 3   | 295.5 | 0.036756 | 3.399709 | 6.531286 | Up | 7.36E-05 | 0.000139 |
| Tdh          | 1546 | 0.5 | 49    | 0.011387 | 1.052945 | 6.53085  | Up | 1.78E-15 | 7.51E-15 |
| Lix1         | 1522 | 1.5 | 145   | 0.035454 | 3.177193 | 6.485645 | Up | 0.000575 | 0.001011 |
| Amhr2        | 1964 | 2   | 192   | 0.036439 | 3.248761 | 6.478257 | Up | 0.000115 | 0.000214 |
| Itgam        | 3456 | 0   | 9     | 0.001    | 0.087205 | 6.446343 | Up | 0.001953 | 0.003245 |
| LOC100912250 | 976  | 1   | 91.5  | 0.036076 | 3.13693  | 6.442186 | Up | 0.000575 | 0.001004 |

|              |       |       |       |          |          |          |    |          |          |
|--------------|-------|-------|-------|----------|----------|----------|----|----------|----------|
| Tmem30b      | 3076  | 0     | 8     | 0.001    | 0.086247 | 6.430395 | Up | 0.003906 | 0.00633  |
| Kif27        | 4468  | 1.5   | 136.5 | 0.011821 | 1.01908  | 6.429813 | Up | 0.000575 | 0.001003 |
| Cntnap5c     | 3918  | 0     | 10    | 0.001    | 0.086133 | 6.428491 | Up | 0.000977 | 0.001661 |
| Txnip        | 2771  | 477.5 | 43899 | 6.15594  | 528.9393 | 6.424979 | Up | 0        | 0        |
| Muc19        | 12067 | 0     | 31    | 0.001    | 0.085547 | 6.418639 | Up | 4.66E-10 | 1.13E-09 |
| Lhfp13       | 3106  | 0     | 8     | 0.001    | 0.085414 | 6.416393 | Up | 0.003906 | 0.006324 |
| Mpp4         | 2201  | 1     | 89.5  | 0.015997 | 1.35537  | 6.404725 | Up | 0.000575 | 0.001005 |
| Mapk4        | 3596  | 0     | 9     | 0.001    | 0.08381  | 6.389053 | Up | 0.001953 | 0.003245 |
| Kcnc1        | 3977  | 0     | 10    | 0.001    | 0.083271 | 6.379739 | Up | 0.000977 | 0.00166  |
| Col6a6       | 7165  | 0     | 17.5  | 0.001    | 0.081482 | 6.348411 | Up | 7.63E-06 | 1.54E-05 |
| B3gnt6       | 1594  | 1     | 85.5  | 0.022089 | 1.787718 | 6.33865  | Up | 0.000575 | 0.001008 |
| Ankrd34b     | 3292  | 0     | 8     | 0.001    | 0.080588 | 6.332486 | Up | 0.003906 | 0.006344 |
| Cldn6        | 1544  | 1     | 87.5  | 0.023547 | 1.883028 | 6.321364 | Up | 0.000575 | 0.001007 |
| Efnb3        | 3143  | 1     | 86    | 0.011568 | 0.911825 | 6.300607 | Up | 0.000575 | 0.001006 |
| Dll4         | 3409  | 0     | 8     | 0.001    | 0.07835  | 6.291858 | Up | 0.003906 | 0.006329 |
| Snai3        | 1594  | 1     | 81.5  | 0.022089 | 1.710148 | 6.274652 | Up | 0.000575 | 0.00101  |
| Cdcp1        | 5232  | 0     | 12    | 0.001    | 0.076231 | 6.25231  | Up | 0.000244 | 0.00044  |
| RGD1565058   | 566   | 0.5   | 40    | 0.031104 | 2.364263 | 6.248143 | Up | 9.09E-13 | 2.89E-12 |
| LOC367140    | 1059  | 3     | 243.5 | 0.100827 | 7.659337 | 6.247259 | Up | 7.36E-05 | 0.000139 |
| Cacna1f      | 5975  | 0.5   | 40    | 0.002946 | 0.222606 | 6.239384 | Up | 9.09E-13 | 2.89E-12 |
| Tsks         | 1820  | 2     | 164.5 | 0.039952 | 3.014934 | 6.237701 | Up | 0.000115 | 0.000214 |
| LOC294887    | 3924  | 0     | 9     | 0.001    | 0.075428 | 6.237036 | Up | 0.001953 | 0.003241 |
| Gpr97        | 1962  | 2     | 157.5 | 0.035892 | 2.686327 | 6.225839 | Up | 0.000115 | 0.000214 |
| LOC100910903 | 797   | 4     | 316.5 | 0.178151 | 13.27588 | 6.219566 | Up | 4.59E-05 | 8.83E-05 |
| Col4a5       | 6615  | 0     | 15    | 0.001    | 0.073666 | 6.20293  | Up | 3.05E-05 | 5.93E-05 |

|              |      |     |       |          |          |          |    |          |          |
|--------------|------|-----|-------|----------|----------|----------|----|----------|----------|
| Tp73         | 4749 | 5   | 398   | 0.038037 | 2.789334 | 6.196384 | Up | 2.76E-05 | 5.40E-05 |
| LOC100362022 | 3479 | 0.5 | 38.5  | 0.00506  | 0.370119 | 6.192611 | Up | 3.64E-12 | 1.03E-11 |
| LOC100360457 | 4605 | 0   | 10    | 0.001    | 0.072501 | 6.179933 | Up | 0.000977 | 0.00166  |
| Actbl2       | 2748 | 0.5 | 38    | 0.006406 | 0.462663 | 6.174296 | Up | 3.64E-12 | 1.03E-11 |
| LOC100910799 | 633  | 1   | 76    | 0.055624 | 4.005683 | 6.170205 | Up | 0.000575 | 0.001009 |
| lqsec3       | 7410 | 0   | 16    | 0.001    | 0.071847 | 6.166863 | Up | 1.53E-05 | 3.03E-05 |
| Impg2        | 4370 | 0.5 | 38    | 0.00416  | 0.290732 | 6.127031 | Up | 3.64E-12 | 1.03E-11 |
| Ms4a14       | 3801 | 0   | 8     | 0.001    | 0.069796 | 6.125072 | Up | 0.003906 | 0.006337 |
| Gprc5d       | 1402 | 4   | 299.5 | 0.102092 | 7.113266 | 6.122571 | Up | 4.59E-05 | 8.82E-05 |
| Cgnl1        | 6480 | 1   | 74.5  | 0.005611 | 0.38322  | 6.093876 | Up | 0.000575 | 0.001004 |
| Lrrc37a      | 9414 | 6   | 440   | 0.022928 | 1.561993 | 6.090119 | Up | 1.62E-05 | 3.21E-05 |
| RGD1564308   | 1216 | 2   | 148   | 0.059797 | 4.056125 | 6.083881 | Up | 0.000115 | 0.000214 |
| LOC687465    | 5496 | 0   | 11    | 0.001    | 0.067314 | 6.072824 | Up | 0.000488 | 0.000865 |
| Il12a        | 793  | 1   | 73    | 0.045847 | 3.056415 | 6.058869 | Up | 0.000575 | 0.001007 |
| LOC100361323 | 4073 | 0   | 8     | 0.001    | 0.065577 | 6.035115 | Up | 0.003906 | 0.006325 |
| Cd69         | 1630 | 11  | 777   | 0.243241 | 15.89408 | 6.02996  | Up | 8.84E-07 | 1.88E-06 |
| Bai1         | 5543 | 0   | 11    | 0.001    | 0.065119 | 6.025007 | Up | 0.000488 | 0.000864 |
| Mybpc3       | 4165 | 0   | 8     | 0.001    | 0.064344 | 6.007743 | Up | 0.003906 | 0.006346 |
| Tchh         | 4722 | 0   | 9     | 0.001    | 0.063444 | 5.987406 | Up | 0.001953 | 0.003242 |
| Baat         | 1734 | 2   | 133   | 0.040611 | 2.56133  | 5.978876 | Up | 0.000115 | 0.000214 |
| Nell1        | 2915 | 1   | 69    | 0.012472 | 0.786274 | 5.978237 | Up | 0.000575 | 0.00101  |
| Agbl3        | 3123 | 18  | 1210  | 0.205876 | 12.93075 | 5.972886 | Up | 1.14E-08 | 2.63E-08 |
| Scn11a       | 5905 | 0   | 11    | 0.001    | 0.062651 | 5.969269 | Up | 0.000488 | 0.000863 |
| Nhlh1        | 2452 | 1   | 68.5  | 0.014827 | 0.92665  | 5.965692 | Up | 0.000575 | 0.001005 |
| Anxa3        | 3392 | 2   | 133   | 0.021268 | 1.308032 | 5.942593 | Up | 0.000115 | 0.000214 |

|              |      |     |       |          |          |          |    |          |          |
|--------------|------|-----|-------|----------|----------|----------|----|----------|----------|
| Il17f        | 1308 | 1   | 67    | 0.027796 | 1.707428 | 5.940824 | Up | 0.000575 | 0.001008 |
| Il25         | 510  | 2   | 134   | 0.142575 | 8.740455 | 5.937914 | Up | 0.000115 | 0.000214 |
| LOC100912110 | 1372 | 9   | 590.5 | 0.235984 | 14.37964 | 5.929197 | Up | 2.92E-06 | 6.06E-06 |
| RGD1563398   | 5019 | 0   | 9     | 0.001    | 0.060407 | 5.916638 | Up | 0.001953 | 0.00324  |
| RGD1563124   | 372  | 2   | 129.5 | 0.1893   | 11.31166 | 5.900993 | Up | 0.000115 | 0.000214 |
| Trhde        | 6678 | 0   | 12    | 0.001    | 0.059725 | 5.900256 | Up | 0.000244 | 0.00044  |
| Gpr81        | 1056 | 1   | 63    | 0.033343 | 1.985861 | 5.896254 | Up | 0.000575 | 0.001006 |
| Abcc12       | 4541 | 0   | 8     | 0.001    | 0.059215 | 5.887887 | Up | 0.003906 | 0.006333 |
| RGD1564171   | 636  | 15  | 944.5 | 0.83583  | 49.38835 | 5.884818 | Up | 7.51E-08 | 1.68E-07 |
| Fsd2         | 2927 | 2   | 125   | 0.024059 | 1.420892 | 5.884099 | Up | 0.000115 | 0.000213 |
| Tnfsf4       | 1804 | 1   | 61.5  | 0.019518 | 1.137438 | 5.864867 | Up | 0.000575 | 0.001005 |
| Fam71e2      | 3063 | 1   | 63.5  | 0.01187  | 0.690242 | 5.861756 | Up | 0.000575 | 0.001011 |
| Moxd1        | 2990 | 0.5 | 30.5  | 0.005888 | 0.342223 | 5.861035 | Up | 9.31E-10 | 2.24E-09 |
| Plcz1        | 1938 | 1   | 63    | 0.01876  | 1.085794 | 5.854955 | Up | 0.000575 | 0.001003 |
| LOC100912131 | 743  | 15  | 919.5 | 0.713917 | 41.2785  | 5.853489 | Up | 7.51E-08 | 1.68E-07 |
| Pi16         | 1900 | 2   | 123.5 | 0.037667 | 2.175117 | 5.851665 | Up | 0.000115 | 0.000214 |
| Slc6a20      | 1950 | 1   | 62.5  | 0.01835  | 1.05832  | 5.849823 | Up | 0.000575 | 0.001008 |
| Tmem132b     | 4605 | 1   | 62    | 0.007895 | 0.449508 | 5.831255 | Up | 0.000575 | 0.001004 |
| Gsdmc        | 1529 | 1   | 60    | 0.023028 | 1.308966 | 5.828895 | Up | 0.000575 | 0.001008 |
| LOC299567    | 1615 | 1   | 60    | 0.021802 | 1.232575 | 5.821089 | Up | 0.000575 | 0.001009 |
| LOC499240    | 1255 | 4   | 238.5 | 0.113136 | 6.353072 | 5.81132  | Up | 4.59E-05 | 8.81E-05 |
| Foxd4        | 1451 | 0.5 | 30.5  | 0.012528 | 0.70148  | 5.807158 | Up | 9.31E-10 | 2.24E-09 |
| Jakmip3      | 5964 | 0   | 10    | 0.001    | 0.055377 | 5.791213 | Up | 0.000977 | 0.001658 |
| Cidec        | 1654 | 1   | 60    | 0.021981 | 1.21113  | 5.783949 | Up | 0.000575 | 0.00101  |
| Muc2         | 6134 | 0   | 10    | 0.001    | 0.054136 | 5.758507 | Up | 0.000977 | 0.001658 |

|              |      |     |       |          |          |          |    |          |          |
|--------------|------|-----|-------|----------|----------|----------|----|----------|----------|
| Mcf2         | 3204 | 1   | 57    | 0.010989 | 0.590308 | 5.747294 | Up | 0.000575 | 0.001007 |
| LOC100912291 | 709  | 1   | 58.5  | 0.051279 | 2.736358 | 5.737751 | Up | 0.000575 | 0.001008 |
| Rasal3       | 3966 | 2   | 114   | 0.018045 | 0.961043 | 5.73493  | Up | 0.000115 | 0.000214 |
| Lypd1        | 2038 | 9   | 512.5 | 0.158022 | 8.404461 | 5.732957 | Up | 2.92E-06 | 6.07E-06 |
| LOC684158    | 2151 | 1.5 | 86    | 0.025087 | 1.333178 | 5.731801 | Up | 0.000575 | 0.001007 |
| Dpf3         | 1240 | 1   | 58    | 0.02932  | 1.555835 | 5.729665 | Up | 0.000575 | 0.001005 |
| Fgg          | 1554 | 3.5 | 199   | 0.081146 | 4.278878 | 5.720562 | Up | 7.36E-05 | 0.000139 |
| Mab21l3      | 3926 | 7   | 393   | 0.063655 | 3.337727 | 5.71245  | Up | 9.28E-06 | 1.87E-05 |
| Cux2         | 5092 | 1   | 54.5  | 0.006915 | 0.357076 | 5.690415 | Up | 0.000575 | 0.001005 |
| Tfr2         | 2964 | 3   | 165   | 0.036024 | 1.851594 | 5.68365  | Up | 7.36E-05 | 0.000139 |
| Ltk          | 2252 | 1   | 54    | 0.015635 | 0.803369 | 5.683222 | Up | 0.000575 | 0.001009 |
| RGD1565989   | 1061 | 1   | 54    | 0.033185 | 1.699235 | 5.678189 | Up | 0.000575 | 0.001009 |
| LOC100125386 | 1326 | 1   | 55    | 0.027418 | 1.382786 | 5.656295 | Up | 0.000575 | 0.001007 |
| Ceacam19     | 2024 | 6   | 325.5 | 0.106643 | 5.351707 | 5.649132 | Up | 1.62E-05 | 3.21E-05 |
| LOC498470    | 1405 | 1   | 53.5  | 0.025877 | 1.278039 | 5.626138 | Up | 0.000575 | 0.001007 |
| LOC100360380 | 2193 | 50  | 2627  | 0.81219  | 39.96377 | 5.620731 | Up | 3.62E-14 | 1.46E-13 |
| LOC100363061 | 1137 | 1   | 53.5  | 0.031976 | 1.57295  | 5.620342 | Up | 0.000575 | 0.00101  |
| Gpr83        | 3673 | 1   | 52    | 0.009586 | 0.471199 | 5.619247 | Up | 0.000575 | 0.001005 |
| C9           | 2083 | 1   | 51.5  | 0.016903 | 0.823078 | 5.605642 | Up | 0.000575 | 0.001008 |
| LOC288019    | 1536 | 7.5 | 394   | 0.172296 | 8.336713 | 5.596516 | Up | 9.28E-06 | 1.87E-05 |
| LOC688591    | 996  | 1   | 52.5  | 0.036503 | 1.759395 | 5.590933 | Up | 0.000575 | 0.001011 |
| Ly6g6c       | 846  | 3   | 155   | 0.127569 | 6.127608 | 5.585977 | Up | 7.36E-05 | 0.000139 |
| Itgb3        | 2378 | 2   | 101   | 0.029613 | 1.414621 | 5.578043 | Up | 0.000115 | 0.000214 |
| Lppr4        | 5554 | 0   | 8     | 0.001    | 0.047766 | 5.577923 | Up | 0.003906 | 0.006338 |
| LOC688839    | 2076 | 2.5 | 127   | 0.042953 | 2.045484 | 5.573525 | Up | 0.000115 | 0.000214 |



|              |       |     |       |          |          |          |    |          |          |
|--------------|-------|-----|-------|----------|----------|----------|----|----------|----------|
| Gpr111       | 1953  | 1   | 50    | 0.018029 | 0.858444 | 5.573367 | Up | 0.000575 | 0.001011 |
| Spdya        | 1896  | 6.5 | 329   | 0.122523 | 5.781044 | 5.560201 | Up | 1.62E-05 | 3.21E-05 |
| LOC100912633 | 1111  | 1   | 49.5  | 0.031692 | 1.489556 | 5.554621 | Up | 0.000575 | 0.001011 |
| Acsbg2       | 2644  | 0.5 | 24.5  | 0.006658 | 0.311924 | 5.549868 | Up | 5.96E-08 | 1.34E-07 |
| Grin2b       | 5259  | 2   | 99    | 0.01339  | 0.623882 | 5.542012 | Up | 0.000115 | 0.000214 |
| Atp2b2       | 7019  | 0   | 10    | 0.001    | 0.046541 | 5.540415 | Up | 0.000977 | 0.001659 |
| Zc2hc1c      | 2004  | 1   | 49    | 0.01757  | 0.815895 | 5.537217 | Up | 0.000575 | 0.001007 |
| Otogl-ps1    | 6798  | 1   | 49    | 0.005179 | 0.239461 | 5.53085  | Up | 0.000575 | 0.001007 |
| RGD1560099   | 588   | 1   | 49    | 0.059881 | 2.766928 | 5.530052 | Up | 0.000575 | 0.001006 |
| Plg          | 2752  | 3   | 148.5 | 0.039216 | 1.80403  | 5.523628 | Up | 7.36E-05 | 0.000139 |
| Lman1l       | 1588  | 0.5 | 24.5  | 0.011086 | 0.509714 | 5.522851 | Up | 5.96E-08 | 1.34E-07 |
| LOC689991    | 11066 | 1   | 49    | 0.003182 | 0.146128 | 5.521246 | Up | 0.000575 | 0.001006 |
| Olr809       | 936   | 2   | 100   | 0.077685 | 3.559274 | 5.5178   | Up | 0.000115 | 0.000214 |
| LOC100912068 | 2148  | 1   | 48    | 0.016392 | 0.749426 | 5.514731 | Up | 0.000575 | 0.001006 |
| Neurod4      | 3314  | 2   | 98    | 0.021595 | 0.986755 | 5.513911 | Up | 0.000115 | 0.000214 |
| Phgr1        | 443   | 2   | 98.5  | 0.164138 | 7.434653 | 5.50128  | Up | 0.000115 | 0.000214 |
| Abca13       | 15126 | 0.5 | 24    | 0.001164 | 0.052498 | 5.495241 | Up | 5.96E-08 | 1.34E-07 |
| Timp1        | 740   | 6   | 290   | 0.290134 | 13.05605 | 5.491853 | Up | 1.62E-05 | 3.21E-05 |
| Gzmk         | 884   | 2   | 96    | 0.080958 | 3.635899 | 5.489003 | Up | 0.000115 | 0.000214 |
| Slc23a3      | 2052  | 9   | 429.5 | 0.156665 | 7.006768 | 5.482998 | Up | 2.92E-06 | 6.06E-06 |
| Bmp6         | 1521  | 1   | 48    | 0.023903 | 1.052444 | 5.460399 | Up | 0.000575 | 0.001005 |
| Xlr4a        | 648   | 1   | 48    | 0.056106 | 2.461986 | 5.455524 | Up | 0.000575 | 0.001004 |
| Pdlim3       | 1568  | 1   | 48    | 0.023187 | 1.016305 | 5.453895 | Up | 0.000575 | 0.001005 |
| Cel          | 2062  | 1   | 46    | 0.017076 | 0.747427 | 5.451927 | Up | 0.000575 | 0.001008 |
| Btn1a1       | 1575  | 1   | 46    | 0.022355 | 0.977393 | 5.450241 | Up | 0.000575 | 0.001009 |

|              |       |     |       |          |          |          |    |          |          |
|--------------|-------|-----|-------|----------|----------|----------|----|----------|----------|
| LOC100365119 | 1805  | 1   | 47.5  | 0.020142 | 0.879348 | 5.448142 | Up | 0.000575 | 0.001008 |
| lqch         | 3618  | 4.5 | 209   | 0.044269 | 1.928398 | 5.44497  | Up | 4.59E-05 | 8.84E-05 |
| Vom2r44      | 2670  | 7   | 324.5 | 0.093599 | 4.052798 | 5.436282 | Up | 9.28E-06 | 1.86E-05 |
| RGD1560527   | 2331  | 1   | 47    | 0.015597 | 0.674337 | 5.434127 | Up | 0.000575 | 0.001009 |
| Col20a1      | 4188  | 14  | 647.5 | 0.119345 | 5.152963 | 5.432188 | Up | 1.40E-07 | 3.11E-07 |
| LOC687758    | 984   | 10  | 458.5 | 0.360154 | 15.53161 | 5.430449 | Up | 1.61E-06 | 3.40E-06 |
| LOC100912842 | 614   | 0.5 | 23.5  | 0.029606 | 1.275635 | 5.429163 | Up | 1.19E-07 | 2.65E-07 |
| Cxcl11       | 1054  | 6   | 272.5 | 0.202067 | 8.623677 | 5.415394 | Up | 1.62E-05 | 3.20E-05 |
| LOC100911495 | 1243  | 3   | 138   | 0.086825 | 3.705213 | 5.415307 | Up | 7.36E-05 | 0.000139 |
| LOC100365779 | 2316  | 2   | 91    | 0.030901 | 1.312997 | 5.409071 | Up | 0.000115 | 0.000213 |
| LOC498465    | 1403  | 2   | 89.5  | 0.050192 | 2.125638 | 5.40429  | Up | 0.000115 | 0.000214 |
| Hmgb1-ps2    | 1904  | 0.5 | 22.5  | 0.009246 | 0.389103 | 5.395138 | Up | 2.38E-07 | 5.24E-07 |
| Tmco5b       | 1235  | 3   | 132   | 0.08553  | 3.558266 | 5.378602 | Up | 7.36E-05 | 0.000139 |
| LOC300308    | 3991  | 3   | 135   | 0.027042 | 1.121453 | 5.374043 | Up | 7.36E-05 | 0.000139 |
| LOC679119    | 1929  | 1   | 45.5  | 0.018847 | 0.780741 | 5.372405 | Up | 0.000575 | 0.001006 |
| Klhl14       | 4068  | 3   | 132.5 | 0.026248 | 1.086456 | 5.371286 | Up | 7.36E-05 | 0.000139 |
| St6galnac3   | 2956  | 1.5 | 67    | 0.018255 | 0.754911 | 5.369948 | Up | 0.000575 | 0.001003 |
| RGD1565804   | 8082  | 0   | 10    | 0.001    | 0.04131  | 5.368422 | Up | 0.000977 | 0.001661 |
| Cmya5        | 11694 | 1   | 43    | 0.003011 | 0.122844 | 5.35047  | Up | 0.000575 | 0.001008 |
| Rab44        | 2169  | 4   | 173   | 0.065462 | 2.665015 | 5.347353 | Up | 4.59E-05 | 8.82E-05 |
| Nfe2l3       | 1944  | 3   | 130   | 0.054926 | 2.233583 | 5.345725 | Up | 7.36E-05 | 0.000139 |
| Tspan1       | 1256  | 1   | 44    | 0.028946 | 1.172468 | 5.340021 | Up | 0.000575 | 0.001005 |
| P2ry4        | 1177  | 4   | 170   | 0.119659 | 4.805401 | 5.32765  | Up | 4.59E-05 | 8.81E-05 |
| 4-Mar        | 1230  | 1   | 44    | 0.029558 | 1.183349 | 5.32317  | Up | 0.000575 | 0.001011 |
| Tspy1        | 1245  | 2   | 83.5  | 0.056562 | 2.244618 | 5.310495 | Up | 0.000115 | 0.000213 |

|              |       |       |        |          |          |          |    |          |          |
|--------------|-------|-------|--------|----------|----------|----------|----|----------|----------|
| LOC100913005 | 558   | 15.5  | 657.5  | 0.99141  | 39.27487 | 5.307982 | Up | 7.51E-08 | 1.68E-07 |
| Fam71f1      | 1600  | 45.5  | 1865.5 | 1.012031 | 38.94353 | 5.266059 | Up | 2.49E-14 | 1.02E-13 |
| LOC690486    | 966   | 3     | 123    | 0.110534 | 4.249252 | 5.264641 | Up | 7.36E-05 | 0.000139 |
| Bcmo1        | 1932  | 2     | 81     | 0.037043 | 1.401621 | 5.241764 | Up | 0.000115 | 0.000214 |
| Dnah12       | 11853 | 1     | 41     | 0.003067 | 0.116018 | 5.241235 | Up | 0.000575 | 0.00101  |
| Slco5a1      | 3246  | 2.5   | 102    | 0.027824 | 1.050787 | 5.238972 | Up | 0.000115 | 0.000214 |
| RGD1563285   | 931   | 1     | 41     | 0.039051 | 1.471277 | 5.235559 | Up | 0.000575 | 0.001006 |
| LOC100911553 | 695   | 170   | 6834   | 8.711479 | 328.0185 | 5.234716 | Up | 3.78E-13 | 1.30E-12 |
| Kcnk2        | 3187  | 4     | 160.5  | 0.044552 | 1.677011 | 5.23427  | Up | 4.59E-05 | 8.81E-05 |
| Efna2        | 1177  | 1     | 41     | 0.030889 | 1.160713 | 5.231762 | Up | 0.000575 | 0.001009 |
| Ch25h        | 1341  | 0.5   | 20     | 0.013128 | 0.491899 | 5.227621 | Up | 9.54E-07 | 2.03E-06 |
| LOC501529    | 1005  | 1     | 41.5   | 0.036176 | 1.346867 | 5.218439 | Up | 0.000575 | 0.001004 |
| Bai2         | 5001  | 4     | 161    | 0.02885  | 1.073221 | 5.217222 | Up | 4.59E-05 | 8.81E-05 |
| Abli3        | 2833  | 1     | 40     | 0.012428 | 0.459962 | 5.209795 | Up | 0.000575 | 0.001009 |
| lsg20        | 817   | 155.5 | 6169   | 6.821519 | 251.8491 | 5.206323 | Up | 3.73E-13 | 1.29E-12 |
| Spata17      | 1197  | 2.5   | 97     | 0.074496 | 2.701772 | 5.180605 | Up | 0.000115 | 0.000214 |
| Ttc23l       | 1455  | 2     | 79     | 0.049975 | 1.811518 | 5.179854 | Up | 0.000115 | 0.000214 |
| Fam23a       | 1139  | 1     | 38.5   | 0.030913 | 1.12023  | 5.179442 | Up | 0.000575 | 0.001004 |
| Gadd45b      | 1300  | 740.5 | 28691  | 20.35026 | 736.8497 | 5.178251 | Up | 0        | 0        |
| Adssl1       | 1792  | 6     | 230    | 0.11853  | 4.284635 | 5.175849 | Up | 1.62E-05 | 3.20E-05 |
| RGD1561678   | 8136  | 0     | 9      | 0.001    | 0.035937 | 5.167386 | Up | 0.001953 | 0.003247 |
| LOC100365773 | 2618  | 1     | 38     | 0.013449 | 0.483231 | 5.167129 | Up | 0.000575 | 0.001006 |
| Tg           | 8461  | 34    | 1316   | 0.144606 | 5.184168 | 5.163913 | Up | 5.99E-13 | 1.97E-12 |
| Pla2g12b     | 1114  | 1.5   | 57     | 0.04741  | 1.699415 | 5.163704 | Up | 0.000575 | 0.001008 |
| Timm8a2      | 856   | 0.5   | 19     | 0.020566 | 0.733702 | 5.156829 | Up | 1.91E-06 | 3.99E-06 |

|              |      |        |         |          |          |          |    |          |          |
|--------------|------|--------|---------|----------|----------|----------|----|----------|----------|
| Plk2         | 2781 | 3294.5 | 125658  | 42.3155  | 1508.456 | 5.155742 | Up | 0        | 0        |
| Edn1         | 1390 | 142    | 5395.5  | 3.653903 | 129.4339 | 5.146633 | Up | 2.91E-13 | 1.03E-12 |
| Gadd45g      | 1064 | 460    | 17518.5 | 15.52732 | 549.7645 | 5.145933 | Up | 1.49E-13 | 5.55E-13 |
| RGD1560289   | 3034 | 6      | 223     | 0.06963  | 2.453348 | 5.13889  | Up | 1.62E-05 | 3.20E-05 |
| Tp53inp1     | 1013 | 120    | 4511.5  | 4.218504 | 148.6245 | 5.138797 | Up | 0        | 0        |
| Gbp4         | 2560 | 23     | 863.5   | 0.319922 | 11.25327 | 5.13648  | Up | 4.68E-10 | 1.13E-09 |
| St8sia5      | 1131 | 4      | 149.5   | 0.12554  | 4.408027 | 5.133911 | Up | 4.59E-05 | 8.83E-05 |
| Robo3        | 5682 | 0.5    | 18.5    | 0.003098 | 0.108625 | 5.131703 | Up | 3.81E-06 | 7.85E-06 |
| Ankrd60      | 938  | 1      | 37      | 0.037537 | 1.316004 | 5.131703 | Up | 0.000575 | 0.001009 |
| LOC499994    | 4044 | 0.5    | 18.5    | 0.004353 | 0.151955 | 5.125378 | Up | 3.81E-06 | 7.85E-06 |
| RGD1562099   | 2609 | 1      | 38      | 0.013935 | 0.485588 | 5.122937 | Up | 0.000575 | 0.00101  |
| Armcx6       | 1955 | 0.5    | 18.5    | 0.009005 | 0.312944 | 5.119025 | Up | 3.81E-06 | 7.85E-06 |
| RGD1308775   | 2518 | 10     | 371.5   | 0.141654 | 4.919917 | 5.118188 | Up | 1.61E-06 | 3.40E-06 |
| LOC100911416 | 1430 | 2      | 73      | 0.049244 | 1.701844 | 5.110993 | Up | 0.000115 | 0.000214 |
| Ppp2r2c      | 1344 | 5      | 184.5   | 0.133549 | 4.58156  | 5.1004   | Up | 2.76E-05 | 5.40E-05 |
| Dnase1       | 1313 | 1      | 36.5    | 0.026816 | 0.917493 | 5.096515 | Up | 0.000575 | 0.001011 |
| Slc6a5       | 7075 | 1      | 36      | 0.004977 | 0.169883 | 5.093226 | Up | 0.000575 | 0.001004 |
| Tat          | 2037 | 0.5    | 18      | 0.008643 | 0.295023 | 5.093226 | Up | 3.81E-06 | 7.85E-06 |
| RGD1560775   | 746  | 1      | 36      | 0.047198 | 1.606334 | 5.088899 | Up | 0.000575 | 0.001011 |
| Rsad2        | 3628 | 8      | 288     | 0.07843  | 2.645122 | 5.075777 | Up | 5.24E-06 | 1.07E-05 |
| Ldhc         | 1193 | 2.5    | 91.5    | 0.076187 | 2.555023 | 5.067639 | Up | 0.000115 | 0.000214 |
| Niacr1       | 1083 | 12.5   | 449.5   | 0.413805 | 13.86761 | 5.066625 | Up | 4.81E-07 | 1.04E-06 |
| Tcte1        | 2697 | 1      | 35      | 0.013055 | 0.434942 | 5.05813  | Up | 0.000575 | 0.001007 |
| Lgals4       | 1053 | 2      | 70.5    | 0.066875 | 2.226325 | 5.057049 | Up | 0.000115 | 0.000214 |
| Rinl         | 2998 | 1      | 35      | 0.011744 | 0.390673 | 5.055914 | Up | 0.000575 | 0.00101  |

|              |      |     |       |          |          |          |    |          |          |
|--------------|------|-----|-------|----------|----------|----------|----|----------|----------|
| Slitrk1      | 4039 | 1   | 37    | 0.009001 | 0.299384 | 5.055702 | Up | 0.000575 | 0.001005 |
| LOC100912995 | 1182 | 8   | 281.5 | 0.241703 | 7.937933 | 5.037459 | Up | 5.24E-06 | 1.07E-05 |
| Vwce         | 2625 | 1   | 34.5  | 0.013413 | 0.439998 | 5.035766 | Up | 0.000575 | 0.001003 |
| Ly49i6       | 1207 | 1   | 35.5  | 0.030122 | 0.981592 | 5.026258 | Up | 0.000575 | 0.001006 |
| Lpar2        | 2836 | 5   | 173   | 0.062885 | 2.038547 | 5.018674 | Up | 2.76E-05 | 5.40E-05 |
| Ceacam18-ps1 | 1113 | 4   | 140   | 0.129631 | 4.200408 | 5.018042 | Up | 4.59E-05 | 8.84E-05 |
| Prdm1        | 5159 | 19  | 653   | 0.131007 | 4.23989  | 5.016306 | Up | 6.02E-09 | 1.41E-08 |
| Evpl         | 6090 | 4   | 140.5 | 0.023691 | 0.764712 | 5.012489 | Up | 4.59E-05 | 8.83E-05 |
| LOC683206    | 2779 | 744 | 25729 | 9.576664 | 308.9613 | 5.011759 | Up | 0        | 0        |
| Sgk2         | 2708 | 2   | 70    | 0.026851 | 0.859703 | 5.000775 | Up | 0.000115 | 0.000214 |
| LOC100911050 | 569  | 1   | 34    | 0.06188  | 1.977594 | 4.998126 | Up | 0.000575 | 0.001003 |
| Klk7         | 1369 | 0.5 | 17    | 0.01286  | 0.409989 | 4.99466  | Up | 7.63E-06 | 1.54E-05 |
| LOC685297    | 4674 | 1   | 33.5  | 0.007533 | 0.238234 | 4.982991 | Up | 0.000575 | 0.001003 |
| LOC679528    | 600  | 1   | 34    | 0.058683 | 1.845418 | 4.974861 | Up | 0.000575 | 0.001003 |
| Ngb          | 1773 | 1   | 33    | 0.019859 | 0.623951 | 4.973576 | Up | 0.000575 | 0.001002 |
| Ptk6         | 2142 | 1   | 34    | 0.016973 | 0.53163  | 4.969089 | Up | 0.000575 | 0.001003 |
| Myt1l        | 4491 | 1   | 33    | 0.00784  | 0.245528 | 4.968874 | Up | 0.000575 | 0.001002 |
| Pld6         | 685  | 4   | 134   | 0.210627 | 6.502237 | 4.948171 | Up | 4.59E-05 | 8.83E-05 |
| Afaf         | 1051 | 7   | 228.5 | 0.237237 | 7.277105 | 4.938966 | Up | 9.28E-06 | 1.87E-05 |
| Cd209d       | 915  | 1   | 32    | 0.038481 | 1.165659 | 4.920869 | Up | 0.000575 | 0.001002 |
| Adam32       | 2399 | 1   | 32    | 0.014677 | 0.443842 | 4.918432 | Up | 0.000575 | 0.001002 |
| Ccdc81       | 2378 | 1   | 33    | 0.015289 | 0.46218  | 4.917912 | Up | 0.000575 | 0.001003 |
| LOC100909810 | 1325 | 1   | 33    | 0.027439 | 0.826766 | 4.913179 | Up | 0.000575 | 0.001003 |
| Ptpro        | 4871 | 14  | 450.5 | 0.102611 | 3.086432 | 4.910682 | Up | 1.40E-07 | 3.11E-07 |
| RGD1559747   | 3298 | 1   | 31.5  | 0.010676 | 0.319022 | 4.901199 | Up | 0.000575 | 0.001002 |

|              |       |       |        |          |          |          |    |          |          |
|--------------|-------|-------|--------|----------|----------|----------|----|----------|----------|
| Kcnh5        | 3505  | 1     | 32.5   | 0.010373 | 0.309193 | 4.89763  | Up | 0.000575 | 0.001002 |
| Lrrtm4       | 2732  | 1     | 32     | 0.012888 | 0.382495 | 4.891351 | Up | 0.000575 | 0.001002 |
| Sspo         | 15561 | 4     | 127.5  | 0.009272 | 0.272545 | 4.877486 | Up | 4.59E-05 | 8.80E-05 |
| Lrp2bp       | 1540  | 4.5   | 142.5  | 0.10512  | 3.087903 | 4.876519 | Up | 4.59E-05 | 8.80E-05 |
| RGD1305939   | 3237  | 4     | 124.5  | 0.043863 | 1.287306 | 4.875191 | Up | 4.59E-05 | 8.84E-05 |
| Trpv1        | 2847  | 2     | 63     | 0.025138 | 0.736589 | 4.872947 | Up | 0.000115 | 0.000214 |
| Cd80         | 1000  | 60    | 1880.5 | 2.145847 | 62.72495 | 4.86942  | Up | 0        | 0        |
| Clk4         | 1416  | 231   | 7191   | 5.824965 | 169.4292 | 4.862289 | Up | 0        | 0        |
| Crtam        | 1717  | 1     | 31.5   | 0.021175 | 0.612775 | 4.854955 | Up | 0.000575 | 0.001002 |
| LOC100362909 | 927   | 1     | 30.5   | 0.037983 | 1.098973 | 4.854676 | Up | 0.000575 | 0.001001 |
| RGD1308818   | 1761  | 11    | 340    | 0.223193 | 6.450662 | 4.853086 | Up | 8.84E-07 | 1.89E-06 |
| LOC360998    | 1780  | 1     | 30.5   | 0.019781 | 0.570308 | 4.849569 | Up | 0.000575 | 0.001001 |
| Gjb5         | 816   | 1     | 30     | 0.043149 | 1.23628  | 4.840526 | Up | 0.000575 | 0.001002 |
| Bbc3         | 1823  | 244   | 7524.5 | 4.80955  | 137.7231 | 4.839725 | Up | 2.85E-13 | 1.01E-12 |
| Lpar3        | 2374  | 4.5   | 136.5  | 0.067466 | 1.926306 | 4.835531 | Up | 4.59E-05 | 8.85E-05 |
| Neu3         | 2307  | 12    | 368.5  | 0.186626 | 5.322579 | 4.833905 | Up | 4.81E-07 | 1.04E-06 |
| Birc3        | 2636  | 209.5 | 6395   | 2.839683 | 80.96068 | 4.833419 | Up | 1.08E-13 | 4.16E-13 |
| N4bp2l1      | 2156  | 24    | 732    | 0.398329 | 11.33165 | 4.830254 | Up | 2.47E-10 | 6.04E-10 |
| Htati2       | 1263  | 13    | 392.5  | 0.366045 | 10.37662 | 4.825172 | Up | 2.60E-07 | 5.70E-07 |
| Zmat4        | 4123  | 1     | 30     | 0.00854  | 0.241185 | 4.819783 | Up | 0.000575 | 0.001001 |
| RGD1566144   | 6187  | 146   | 4395.5 | 0.840144 | 23.70038 | 4.818129 | Up | 3.33E-14 | 1.35E-13 |
| Otop1        | 1827  | 4     | 120.5  | 0.078029 | 2.196366 | 4.814959 | Up | 4.59E-05 | 8.84E-05 |
| Fhl1         | 2266  | 1     | 30.5   | 0.015538 | 0.437267 | 4.814613 | Up | 0.000575 | 0.001001 |
| Foxred2      | 1998  | 43    | 1294   | 0.769823 | 21.61839 | 4.811589 | Up | 1.18E-13 | 4.49E-13 |
| Svop         | 2264  | 3     | 91     | 0.047669 | 1.338383 | 4.811289 | Up | 7.36E-05 | 0.000139 |

|              |       |       |        |          |          |          |    |          |          |
|--------------|-------|-------|--------|----------|----------|----------|----|----------|----------|
| RGD1562143   | 636   | 1     | 30.5   | 0.057165 | 1.593314 | 4.800765 | Up | 0.000575 | 0.001002 |
| Ankrd1       | 1749  | 19.5  | 579.5  | 0.398464 | 11.06444 | 4.795339 | Up | 6.02E-09 | 1.41E-08 |
| Grap         | 1560  | 6     | 179    | 0.138363 | 3.837269 | 4.79355  | Up | 1.62E-05 | 3.21E-05 |
| Fam71d       | 1551  | 1     | 30     | 0.023441 | 0.648101 | 4.789125 | Up | 0.000575 | 0.001001 |
| Fam189a2     | 2457  | 2     | 59     | 0.029128 | 0.80355  | 4.78593  | Up | 0.000115 | 0.000214 |
| Stag3        | 4181  | 1     | 30     | 0.008696 | 0.23913  | 4.781354 | Up | 0.000575 | 0.001001 |
| Itih1        | 2906  | 1     | 29     | 0.012116 | 0.33225  | 4.777253 | Up | 0.000575 | 0.001001 |
| Sag          | 1482  | 0.5   | 14.5   | 0.011879 | 0.325748 | 4.777253 | Up | 6.10E-05 | 0.000116 |
| Haplh3       | 1363  | 43    | 1254.5 | 1.123422 | 30.73603 | 4.773959 | Up | 1.18E-13 | 4.49E-13 |
| Cpne2        | 3767  | 4     | 116.5  | 0.037692 | 1.031222 | 4.77395  | Up | 4.59E-05 | 8.85E-05 |
| LOC100361931 | 936   | 1     | 30     | 0.038843 | 1.060474 | 4.770926 | Up | 0.000575 | 0.001001 |
| Lcn3         | 786   | 3     | 89     | 0.138766 | 3.777005 | 4.766518 | Up | 7.36E-05 | 0.000139 |
| Myo7a        | 6807  | 5     | 144.5  | 0.0262   | 0.709864 | 4.759909 | Up | 2.76E-05 | 5.40E-05 |
| Cplx1        | 2102  | 4     | 115.5  | 0.068094 | 1.832172 | 4.74989  | Up | 4.59E-05 | 8.84E-05 |
| Arrdc3       | 1245  | 225   | 6476.5 | 6.469152 | 173.6405 | 4.746383 | Up | 0        | 0        |
| Pdzd3        | 2121  | 2     | 57.5   | 0.033742 | 0.905324 | 4.745823 | Up | 0.000115 | 0.000214 |
| Ccr5         | 2495  | 112.5 | 3228   | 1.611519 | 43.15865 | 4.743157 | Up | 0        | 0        |
| Wdr66        | 3852  | 6     | 170.5  | 0.055142 | 1.474403 | 4.740845 | Up | 1.62E-05 | 3.21E-05 |
| LOC100910626 | 1056  | 1     | 29     | 0.034429 | 0.920282 | 4.740394 | Up | 0.000575 | 0.001001 |
| Fbp1         | 1474  | 1     | 29     | 0.024665 | 0.658696 | 4.739057 | Up | 0.000575 | 0.001001 |
| Ubap1l       | 1383  | 3     | 87.5   | 0.078865 | 2.102238 | 4.736401 | Up | 7.36E-05 | 0.000139 |
| RGD1307660   | 10021 | 0     | 8      | 0.001    | 0.026653 | 4.736252 | Up | 0.003906 | 0.006323 |
| Muc13        | 2672  | 2     | 56     | 0.026355 | 0.701071 | 4.733432 | Up | 0.000115 | 0.000214 |
| Eps8l3       | 2717  | 0.5   | 14     | 0.00648  | 0.172034 | 4.730656 | Up | 6.10E-05 | 0.000116 |
| Htr2b        | 2021  | 0.5   | 14.5   | 0.008995 | 0.238426 | 4.728318 | Up | 6.10E-05 | 0.000116 |

|              |      |      |       |          |          |          |    |          |          |
|--------------|------|------|-------|----------|----------|----------|----|----------|----------|
| Gal3st4      | 2207 | 0.5  | 14.5  | 0.008237 | 0.218332 | 4.728318 | Up | 6.10E-05 | 0.000116 |
| Prl7a3       | 859  | 2.5  | 71    | 0.103808 | 2.750132 | 4.727507 | Up | 0.000115 | 0.000214 |
| Clec2l       | 1430 | 1    | 28    | 0.024622 | 0.648693 | 4.719501 | Up | 0.000575 | 0.001    |
| RGD1563667   | 1920 | 2    | 56    | 0.037274 | 0.981282 | 4.718419 | Up | 0.000115 | 0.000213 |
| Ccdc166      | 1727 | 0.5  | 14    | 0.010194 | 0.268046 | 4.716699 | Up | 6.10E-05 | 0.000116 |
| LOC100911162 | 528  | 3    | 85    | 0.2044   | 5.373066 | 4.716279 | Up | 7.36E-05 | 0.000139 |
| Sptbn4       | 8736 | 23.5 | 663   | 0.096815 | 2.528669 | 4.706997 | Up | 4.68E-10 | 1.13E-09 |
| LOC100360795 | 717  | 1    | 27.5  | 0.049107 | 1.282409 | 4.706781 | Up | 0.000575 | 0.001    |
| Snrpel       | 279  | 1    | 27.5  | 0.1262   | 3.292428 | 4.705368 | Up | 0.000575 | 0.001    |
| LOC501718    | 627  | 0.5  | 14    | 0.028078 | 0.728254 | 4.696929 | Up | 6.10E-05 | 0.000116 |
| Morc1        | 3036 | 11   | 301.5 | 0.128705 | 3.315439 | 4.68706  | Up | 8.84E-07 | 1.89E-06 |
| Dao          | 1646 | 1.5  | 41.5  | 0.032783 | 0.84259  | 4.683791 | Up | 0.000575 | 0.001007 |
| Pipox        | 1716 | 1    | 27    | 0.020519 | 0.525841 | 4.679629 | Up | 0.000575 | 0.001    |
| Flrt3        | 2846 | 354  | 9678  | 4.440222 | 113.5491 | 4.676541 | Up | 0        | 0        |
| Artn         | 1357 | 3    | 81.5  | 0.078686 | 2.008825 | 4.67411  | Up | 7.36E-05 | 0.000139 |
| Fcgr1a       | 1265 | 1    | 28    | 0.02874  | 0.733305 | 4.673258 | Up | 0.000575 | 0.001    |
| Mrap2        | 1313 | 2.5  | 67    | 0.067041 | 1.707781 | 4.670941 | Up | 0.000115 | 0.000214 |
| Gabbr2       | 1757 | 1    | 26.5  | 0.02004  | 0.508424 | 4.665097 | Up | 0.000575 | 0.000999 |
| Pacrg        | 1360 | 1    | 28    | 0.026733 | 0.67811  | 4.664835 | Up | 0.000575 | 0.001001 |
| Nod2         | 3625 | 1    | 27.5  | 0.010029 | 0.254397 | 4.664768 | Up | 0.000575 | 0.001    |
| Tcap         | 997  | 3    | 82    | 0.108248 | 2.74054  | 4.66205  | Up | 7.36E-05 | 0.000139 |
| LOC688981    | 438  | 1    | 27.5  | 0.083006 | 2.099286 | 4.660538 | Up | 0.000575 | 0.001    |
| LOC685440    | 1942 | 3    | 79.5  | 0.054392 | 1.368384 | 4.652933 | Up | 7.36E-05 | 0.000139 |
| RGD1564447   | 411  | 1.5  | 40    | 0.129898 | 3.266844 | 4.652445 | Up | 0.000575 | 0.001007 |
| Tmem220      | 1411 | 1    | 26.5  | 0.024954 | 0.626081 | 4.649019 | Up | 0.000575 | 0.000999 |



|              |       |        |         |          |          |          |    |          |          |
|--------------|-------|--------|---------|----------|----------|----------|----|----------|----------|
| LOC100910117 | 1566  | 19     | 507     | 0.431588 | 10.81891 | 4.647755 | Up | 6.02E-09 | 1.41E-08 |
| Tm6sf2       | 1412  | 3      | 80.5    | 0.075621 | 1.895459 | 4.647624 | Up | 7.36E-05 | 0.000139 |
| Tmem116      | 1357  | 4      | 106.5   | 0.105477 | 2.639165 | 4.645075 | Up | 4.59E-05 | 8.82E-05 |
| Agbl2        | 3295  | 1      | 27      | 0.011034 | 0.275491 | 4.641994 | Up | 0.000575 | 0.001    |
| Grhl3        | 2480  | 1      | 26      | 0.014197 | 0.354378 | 4.64158  | Up | 0.000575 | 0.000999 |
| Elavl4       | 1444  | 1      | 27      | 0.024384 | 0.60744  | 4.638763 | Up | 0.000575 | 0.001    |
| Pln          | 2254  | 7      | 189.5   | 0.1124   | 2.797538 | 4.637442 | Up | 9.28E-06 | 1.87E-05 |
| Liph         | 2785  | 2      | 53      | 0.025697 | 0.637954 | 4.633774 | Up | 0.000115 | 0.000214 |
| LOC100912377 | 3096  | 1      | 26      | 0.011373 | 0.282124 | 4.632688 | Up | 0.000575 | 0.001    |
| Rps6ka6      | 2583  | 1      | 27      | 0.014075 | 0.348643 | 4.630505 | Up | 0.000575 | 0.001    |
| Clca1        | 3608  | 1      | 26      | 0.009759 | 0.241091 | 4.62673  | Up | 0.000575 | 0.000999 |
| Tmem130      | 2774  | 0.5    | 13.5    | 0.006553 | 0.161345 | 4.621827 | Up | 0.000122 | 0.000224 |
| LOC100912317 | 1086  | 1      | 27      | 0.033478 | 0.824258 | 4.621827 | Up | 0.000575 | 0.001    |
| Psors1c2     | 405   | 0.5    | 13.5    | 0.044885 | 1.105116 | 4.621827 | Up | 0.000122 | 0.000225 |
| Tiparp       | 4169  | 1004.5 | 26329.5 | 8.57936  | 210.7167 | 4.618291 | Up | 0        | 0        |
| RGD1562811   | 4805  | 10     | 264.5   | 0.074948 | 1.835871 | 4.614427 | Up | 1.61E-06 | 3.40E-06 |
| Atp2a1       | 3457  | 1      | 26.5    | 0.010517 | 0.256581 | 4.608643 | Up | 0.000575 | 0.000999 |
| Gnrh1        | 467   | 4      | 103.5   | 0.305267 | 7.413887 | 4.602089 | Up | 4.59E-05 | 8.83E-05 |
| Il18r1       | 2436  | 112.5  | 2904.5  | 1.649373 | 39.80326 | 4.592897 | Up | 0        | 0        |
| Gpr160       | 1630  | 1      | 26      | 0.022305 | 0.538072 | 4.592379 | Up | 0.000575 | 0.001    |
| LOC501437    | 351   | 1      | 26      | 0.10358  | 2.493611 | 4.589415 | Up | 0.000575 | 0.001    |
| LOC363301    | 842   | 2.5    | 65      | 0.106585 | 2.565609 | 4.589221 | Up | 0.000115 | 0.000214 |
| Zfp867       | 2800  | 36     | 926     | 0.459251 | 11.02253 | 4.585029 | Up | 2.57E-13 | 9.17E-13 |
| Hormad2      | 1668  | 1      | 25      | 0.021109 | 0.505258 | 4.581091 | Up | 0.000575 | 0.000999 |
| Dnah2        | 13538 | 1      | 25      | 0.002601 | 0.061853 | 4.571817 | Up | 0.000575 | 0.000999 |

|              |      |      |        |          |          |          |    |          |          |
|--------------|------|------|--------|----------|----------|----------|----|----------|----------|
| Ankrd2       | 1116 | 1    | 25     | 0.03155  | 0.750332 | 4.571817 | Up | 0.000575 | 0.000999 |
| Slc17a3      | 2292 | 1.5  | 38     | 0.023293 | 0.552748 | 4.568638 | Up | 0.000575 | 0.001003 |
| Fgd5         | 6131 | 1    | 26     | 0.00593  | 0.140704 | 4.568495 | Up | 0.000575 | 0.001    |
| Col11a1      | 7673 | 7    | 179    | 0.032719 | 0.776168 | 4.56815  | Up | 9.28E-06 | 1.86E-05 |
| LOC680415    | 5925 | 10   | 254    | 0.0602   | 1.427924 | 4.56801  | Up | 1.61E-06 | 3.40E-06 |
| LOC100911400 | 1356 | 0.5  | 13     | 0.013406 | 0.317425 | 4.565481 | Up | 0.000122 | 0.000224 |
| Pvrl4        | 3794 | 20   | 505    | 0.188782 | 4.44466  | 4.557282 | Up | 3.18E-09 | 7.52E-09 |
| Cga          | 667  | 0.5  | 12.5   | 0.026394 | 0.620967 | 4.556227 | Up | 0.000244 | 0.00044  |
| Lrrd1        | 2687 | 4    | 100.5  | 0.053269 | 1.246902 | 4.548916 | Up | 4.59E-05 | 8.82E-05 |
| LOC100909712 | 938  | 283  | 7087.5 | 10.78684 | 251.9219 | 4.545633 | Up | 0        | 0        |
| Fam169a      | 3206 | 11   | 271.5  | 0.12188  | 2.828063 | 4.536277 | Up | 8.84E-07 | 1.89E-06 |
| Npm2         | 624  | 2    | 50     | 0.115609 | 2.665129 | 4.526882 | Up | 0.000115 | 0.000214 |
| Myadml2      | 1666 | 17   | 416.5  | 0.363414 | 8.343732 | 4.521007 | Up | 2.14E-08 | 4.89E-08 |
| Myct1        | 1560 | 1.5  | 37     | 0.034591 | 0.791867 | 4.516799 | Up | 0.000575 | 0.001008 |
| Papln        | 4296 | 1    | 25     | 0.008463 | 0.193662 | 4.51624  | Up | 0.000575 | 0.000999 |
| Dydc1        | 691  | 0.5  | 12     | 0.025477 | 0.582405 | 4.514731 | Up | 0.000244 | 0.00044  |
| Grb7         | 2445 | 3.5  | 86     | 0.051341 | 1.173606 | 4.514701 | Up | 7.36E-05 | 0.000139 |
| Gnal         | 1523 | 1    | 24     | 0.023119 | 0.526122 | 4.508264 | Up | 0.000576 | 0.000999 |
| Grtp1        | 1111 | 3    | 72     | 0.095076 | 2.155581 | 4.502852 | Up | 7.36E-05 | 0.000139 |
| Lpxn         | 1730 | 46   | 1120   | 0.953782 | 21.60262 | 4.501403 | Up | 7.84E-14 | 3.07E-13 |
| LOC311134    | 5784 | 48   | 1160.5 | 0.297155 | 6.697241 | 4.494281 | Up | 1.06E-13 | 4.08E-13 |
| RGD1563020   | 3924 | 0.5  | 12.5   | 0.004633 | 0.103487 | 4.481489 | Up | 0.000244 | 0.000441 |
| Pygm         | 2862 | 12   | 288.5  | 0.150836 | 3.365669 | 4.479841 | Up | 4.81E-07 | 1.04E-06 |
| Ano3         | 5764 | 10.5 | 251    | 0.065234 | 1.4509   | 4.475173 | Up | 1.61E-06 | 3.40E-06 |
| Oxct2a       | 1779 | 1    | 23.5   | 0.019792 | 0.439258 | 4.472086 | Up | 0.000576 | 0.001001 |

|              |      |       |         |          |          |          |    |          |          |
|--------------|------|-------|---------|----------|----------|----------|----|----------|----------|
| Btg2         | 2519 | 479.5 | 11392.5 | 6.812937 | 150.8945 | 4.469119 | Up | 0        | 0        |
| Calhm2       | 1855 | 1     | 23.5    | 0.018981 | 0.419806 | 4.467093 | Up | 0.000576 | 0.001001 |
| Rbpms        | 1060 | 1     | 23.5    | 0.033217 | 0.73466  | 4.467093 | Up | 0.000576 | 0.001    |
| LOC100360476 | 681  | 4     | 93.5    | 0.208496 | 4.597823 | 4.462856 | Up | 4.59E-05 | 8.82E-05 |
| Chst1        | 2395 | 0.5   | 12      | 0.00759  | 0.166907 | 4.458776 | Up | 0.000244 | 0.00044  |
| RGD1566325   | 3972 | 13    | 305     | 0.116393 | 2.555533 | 4.456542 | Up | 2.60E-07 | 5.70E-07 |
| LOC687424    | 4014 | 6     | 142.5   | 0.054059 | 1.186266 | 4.455747 | Up | 1.62E-05 | 3.21E-05 |
| Ebi3         | 1198 | 9     | 214     | 0.272173 | 5.958662 | 4.452393 | Up | 2.92E-06 | 6.06E-06 |
| Guca2b       | 526  | 0.5   | 11.5    | 0.033469 | 0.729084 | 4.445171 | Up | 0.000488 | 0.000864 |
| Dsg2         | 4210 | 1     | 23      | 0.008363 | 0.181757 | 4.441782 | Up | 0.000576 | 0.001001 |
| LOC100362565 | 6522 | 7.5   | 176.5   | 0.041545 | 0.901797 | 4.440066 | Up | 9.28E-06 | 1.87E-05 |
| LOC680456    | 2512 | 4     | 92      | 0.056523 | 1.224915 | 4.437697 | Up | 4.59E-05 | 8.85E-05 |
| LOC501441    | 696  | 0.5   | 11.5    | 0.025294 | 0.547124 | 4.434978 | Up | 0.000488 | 0.000864 |
| LOC100910163 | 1289 | 27    | 623.5   | 0.748198 | 16.15262 | 4.432205 | Up | 3.64E-11 | 9.17E-11 |
| Ebf2         | 5439 | 11    | 253.5   | 0.072053 | 1.555177 | 4.43188  | Up | 8.84E-07 | 1.89E-06 |
| Ankrd7       | 840  | 1     | 22.5    | 0.041916 | 0.902326 | 4.428061 | Up | 0.000578 | 0.001002 |
| Neurl3       | 1394 | 77    | 1775.5  | 1.97696  | 42.44285 | 4.424166 | Up | 0        | 0        |
| Glt8d2       | 1420 | 3     | 69      | 0.076002 | 1.621683 | 4.415307 | Up | 7.36E-05 | 0.000139 |
| Cage1        | 2890 | 7     | 161     | 0.087267 | 1.856532 | 4.411022 | Up | 9.28E-06 | 1.87E-05 |
| Olr1076      | 957  | 1     | 23      | 0.03799  | 0.808043 | 4.41073  | Up | 0.000576 | 0.001    |
| Cryba4       | 800  | 12    | 273.5   | 0.536748 | 11.4158  | 4.410642 | Up | 4.81E-07 | 1.04E-06 |
| Chrne        | 1624 | 6     | 134     | 0.130085 | 2.752606 | 4.403267 | Up | 1.62E-05 | 3.20E-05 |
| Chrm1        | 1383 | 1     | 23      | 0.026288 | 0.551986 | 4.392141 | Up | 0.000576 | 0.001    |
| LOC100910596 | 424  | 13    | 288.5   | 1.08766  | 22.75648 | 4.386977 | Up | 2.60E-07 | 5.69E-07 |
| Myh3         | 6035 | 6     | 134.5   | 0.035576 | 0.744155 | 4.386639 | Up | 1.62E-05 | 3.21E-05 |

|              |       |      |       |          |          |          |    |          |          |
|--------------|-------|------|-------|----------|----------|----------|----|----------|----------|
| LOC100911312 | 735   | 1    | 22    | 0.047904 | 0.999333 | 4.382733 | Up | 0.000578 | 0.001002 |
| Fam19a2      | 1677  | 2    | 44    | 0.041991 | 0.875981 | 4.382733 | Up | 0.000115 | 0.000214 |
| LOC100909904 | 599   | 3    | 67.5  | 0.180172 | 3.75853  | 4.382721 | Up | 7.36E-05 | 0.000139 |
| Pkhd111      | 13006 | 2    | 44    | 0.005414 | 0.112257 | 4.373867 | Up | 0.000115 | 0.000214 |
| RGD1561145   | 1356  | 1    | 22    | 0.025966 | 0.537691 | 4.372087 | Up | 0.000578 | 0.001002 |
| LOC680899    | 2260  | 1    | 22    | 0.01558  | 0.322615 | 4.372087 | Up | 0.000578 | 0.001002 |
| RGD1564472   | 1815  | 3    | 66    | 0.05883  | 1.212082 | 4.364794 | Up | 7.36E-05 | 0.000139 |
| Lppr3        | 2597  | 2    | 43    | 0.027116 | 0.555923 | 4.357683 | Up | 0.000115 | 0.000214 |
| Gjc2         | 2081  | 6    | 131.5 | 0.103171 | 2.111685 | 4.355281 | Up | 1.62E-05 | 3.20E-05 |
| LOC100912207 | 574   | 2.5  | 55    | 0.155351 | 3.173997 | 4.352699 | Up | 0.000115 | 0.000214 |
| Atp10b       | 6756  | 3    | 66.5  | 0.016144 | 0.328563 | 4.347086 | Up | 7.36E-05 | 0.000139 |
| Hecw2        | 5296  | 29   | 636   | 0.196917 | 4.006044 | 4.346516 | Up | 1.04E-11 | 2.73E-11 |
| Stac         | 2184  | 2    | 43.5  | 0.032769 | 0.666427 | 4.346064 | Up | 0.000115 | 0.000214 |
| Ros1         | 7902  | 6    | 131.5 | 0.027388 | 0.555203 | 4.341402 | Up | 1.62E-05 | 3.21E-05 |
| LOC681177    | 1524  | 11.5 | 247.5 | 0.267196 | 5.415279 | 4.341066 | Up | 8.84E-07 | 1.89E-06 |
| RGD1308454   | 1394  | 0.5  | 10.5  | 0.012629 | 0.255676 | 4.339496 | Up | 0.000977 | 0.001659 |
| Zfp541       | 4318  | 7    | 152   | 0.057876 | 1.171513 | 4.339261 | Up | 9.28E-06 | 1.87E-05 |
| LOC100910986 | 1401  | 4    | 86.5  | 0.101346 | 2.047544 | 4.33653  | Up | 4.59E-05 | 8.81E-05 |
| Col4a3       | 5020  | 1    | 22    | 0.007242 | 0.145958 | 4.33295  | Up | 0.000578 | 0.001002 |
| Tas2r108     | 915   | 2    | 43    | 0.078215 | 1.568014 | 4.325355 | Up | 0.000115 | 0.000214 |
| Hmcn2        | 15680 | 21   | 450.5 | 0.047814 | 0.955587 | 4.320875 | Up | 1.68E-09 | 4.01E-09 |
| Txndc2       | 1807  | 1.5  | 32.5  | 0.03018  | 0.602724 | 4.319839 | Up | 0.000575 | 0.001002 |
| Nkapl        | 1519  | 1    | 21    | 0.02318  | 0.460976 | 4.313766 | Up | 0.000581 | 0.001006 |
| Megf6        | 5523  | 4    | 84.5  | 0.025916 | 0.51431  | 4.310736 | Up | 4.59E-05 | 8.83E-05 |
| RGD1562511   | 3475  | 7    | 148.5 | 0.072246 | 1.429206 | 4.306146 | Up | 9.28E-06 | 1.87E-05 |

|              |       |      |       |          |          |          |    |          |          |
|--------------|-------|------|-------|----------|----------|----------|----|----------|----------|
| Mmp25        | 1503  | 4    | 84    | 0.094468 | 1.86593  | 4.303918 | Up | 4.59E-05 | 8.81E-05 |
| Nalcn        | 6779  | 6    | 126.5 | 0.031502 | 0.620959 | 4.30098  | Up | 1.62E-05 | 3.21E-05 |
| Ccno         | 2410  | 7    | 147   | 0.103221 | 2.034216 | 4.300666 | Up | 9.28E-06 | 1.87E-05 |
| LOC680585    | 210   | 1    | 21    | 0.167666 | 3.300108 | 4.298854 | Up | 0.000581 | 0.001006 |
| LOC316124    | 2611  | 2    | 41    | 0.02697  | 0.5253   | 4.283696 | Up | 0.000115 | 0.000214 |
| Tex14        | 4748  | 5    | 105.5 | 0.038045 | 0.74024  | 4.282223 | Up | 2.76E-05 | 5.40E-05 |
| Tmem82       | 1110  | 1    | 20.5  | 0.031721 | 0.615387 | 4.278005 | Up | 0.000586 | 0.001015 |
| LOC100359836 | 3364  | 1    | 20.5  | 0.010467 | 0.203056 | 4.278005 | Up | 0.000586 | 0.001015 |
| Rdh8         | 1158  | 2    | 41.5  | 0.061802 | 1.197671 | 4.276439 | Up | 0.000115 | 0.000214 |
| RGD1559884   | 2530  | 4.5  | 92.5  | 0.063079 | 1.221909 | 4.275824 | Up | 4.59E-05 | 8.82E-05 |
| LOC100362279 | 835   | 3    | 61    | 0.126502 | 2.445504 | 4.272897 | Up | 7.36E-05 | 0.000139 |
| Krt40        | 1296  | 1.5  | 31    | 0.041195 | 0.795826 | 4.271929 | Up | 0.000575 | 0.001002 |
| LOC498350    | 2686  | 4    | 82.5  | 0.053289 | 1.029323 | 4.271728 | Up | 4.59E-05 | 8.83E-05 |
| LOC100360307 | 4793  | 1    | 21    | 0.007585 | 0.146468 | 4.271227 | Up | 0.000581 | 0.001006 |
| Lig4         | 3192  | 380  | 7839  | 4.254879 | 81.95332 | 4.267613 | Up | 0        | 0        |
| LOC171573    | 619   | 1    | 20.5  | 0.056882 | 1.094797 | 4.266554 | Up | 0.000586 | 0.001015 |
| Svep1        | 11265 | 2    | 42    | 0.006455 | 0.124159 | 4.265667 | Up | 0.000115 | 0.000214 |
| Macc1        | 2792  | 2    | 40.5  | 0.025222 | 0.483817 | 4.26171  | Up | 0.000115 | 0.000213 |
| RGD1307937   | 2101  | 3    | 62    | 0.051368 | 0.985237 | 4.261542 | Up | 7.36E-05 | 0.000139 |
| LOC100910424 | 1008  | 20.5 | 420   | 0.72745  | 13.90849 | 4.256974 | Up | 3.18E-09 | 7.52E-09 |
| Rps6kl1      | 1724  | 1    | 20    | 0.020423 | 0.389406 | 4.252987 | Up | 0.000586 | 0.001015 |
| Adcy8        | 4601  | 1    | 20    | 0.007653 | 0.14552  | 4.249113 | Up | 0.000586 | 0.001015 |
| Wt1          | 2645  | 23   | 466   | 0.311375 | 5.873631 | 4.237526 | Up | 4.68E-10 | 1.13E-09 |
| RGD1562865   | 3764  | 13   | 262   | 0.12313  | 2.316776 | 4.233863 | Up | 2.60E-07 | 5.70E-07 |
| Gatsl3       | 1546  | 3    | 59.5  | 0.068324 | 1.282319 | 4.230212 | Up | 7.36E-05 | 0.000139 |

|              |      |        |         |          |          |          |    |          |          |
|--------------|------|--------|---------|----------|----------|----------|----|----------|----------|
| RGD1311447   | 934  | 11     | 219     | 0.417746 | 7.838985 | 4.229968 | Up | 8.84E-07 | 1.89E-06 |
| Zfp354a      | 2561 | 81     | 1626.5  | 1.13512  | 21.17895 | 4.221714 | Up | 5.82E-14 | 2.30E-13 |
| LOC100363294 | 947  | 3      | 59      | 0.111541 | 2.081016 | 4.221641 | Up | 7.36E-05 | 0.000139 |
| Mamdc2       | 3295 | 29     | 576.5   | 0.314762 | 5.844567 | 4.214763 | Up | 1.04E-11 | 2.73E-11 |
| Ccnl1        | 2128 | 1765.5 | 34997   | 29.59265 | 548.4395 | 4.212022 | Up | 3.87E-12 | 1.09E-11 |
| LOC100322897 | 2013 | 1      | 20      | 0.018061 | 0.3335   | 4.206744 | Up | 0.000586 | 0.001015 |
| RGD1559690   | 3368 | 766    | 15025.5 | 8.113831 | 148.9549 | 4.198349 | Up | 1.15E-12 | 3.59E-12 |
| Tas2r137     | 951  | 1.5    | 29      | 0.055536 | 1.019051 | 4.19766  | Up | 0.000575 | 0.001001 |
| LOC100912247 | 525  | 91     | 1783    | 6.17949  | 113.2577 | 4.195977 | Up | 0        | 0        |
| Cckar        | 1502 | 2      | 39      | 0.047647 | 0.868699 | 4.188385 | Up | 0.000115 | 0.000213 |
| Sdcbp2       | 1444 | 14     | 270     | 0.342958 | 6.247673 | 4.187216 | Up | 1.40E-07 | 3.11E-07 |
| Tmem30c      | 1291 | 2      | 39.5    | 0.056323 | 1.021866 | 4.181331 | Up | 0.000115 | 0.000213 |
| RGD1565374   | 1151 | 2      | 39.5    | 0.063174 | 1.146159 | 4.181331 | Up | 0.000115 | 0.000213 |
| Cyp3a9       | 1976 | 164    | 3166    | 2.95071  | 53.48823 | 4.180087 | Up | 1.50E-13 | 5.56E-13 |
| RGD1308195   | 548  | 1.5    | 28.5    | 0.096377 | 1.747034 | 4.180072 | Up | 0.000575 | 0.001001 |
| Nppb         | 628  | 72.5   | 1408.5  | 4.12783  | 74.80298 | 4.17964  | Up | 0        | 0        |
| LOC679582    | 1011 | 1      | 19      | 0.034827 | 0.630118 | 4.177357 | Up | 0.000596 | 0.001032 |
| Fam154b      | 2808 | 10     | 192.5   | 0.127025 | 2.287682 | 4.170705 | Up | 1.61E-06 | 3.40E-06 |
| RGD1561343   | 935  | 1      | 19      | 0.037658 | 0.677486 | 4.169181 | Up | 0.000596 | 0.001031 |
| LOC100913030 | 1090 | 1      | 19      | 0.032303 | 0.579495 | 4.165075 | Up | 0.000596 | 0.001031 |
| Trpm6        | 6441 | 7      | 132     | 0.038622 | 0.685058 | 4.148743 | Up | 9.28E-06 | 1.87E-05 |
| LOC365238    | 2462 | 176    | 3321    | 2.540786 | 45.03997 | 4.147859 | Up | 0        | 0        |
| Lekr1        | 2542 | 26     | 494     | 0.365997 | 6.484691 | 4.147135 | Up | 6.87E-11 | 1.72E-10 |
| Myo1a        | 3332 | 8      | 151.5   | 0.08557  | 1.513311 | 4.144461 | Up | 5.24E-06 | 1.07E-05 |
| LOC100910531 | 571  | 3      | 57      | 0.189007 | 3.337563 | 4.142282 | Up | 7.36E-05 | 0.000139 |

|              |      |        |         |          |          |          |    |          |          |
|--------------|------|--------|---------|----------|----------|----------|----|----------|----------|
| RGD1560166   | 1666 | 2      | 38      | 0.042957 | 0.758282 | 4.141768 | Up | 0.000115 | 0.000213 |
| Akr1c19      | 1355 | 48     | 901     | 1.258711 | 22.18975 | 4.139875 | Up | 1.06E-13 | 4.07E-13 |
| LOC100363223 | 867  | 1      | 19      | 0.041934 | 0.738927 | 4.139244 | Up | 0.000596 | 0.001032 |
| Reep6        | 2152 | 1      | 18.5    | 0.016361 | 0.28806  | 4.138001 | Up | 0.000615 | 0.001063 |
| Fos          | 1589 | 171    | 3233.5  | 3.861995 | 67.82278 | 4.134352 | Up | 3.66E-13 | 1.27E-12 |
| LOC100909860 | 478  | 12     | 225     | 0.898324 | 15.7099  | 4.128295 | Up | 4.81E-07 | 1.04E-06 |
| Sh3bgr       | 548  | 0.5    | 9.5     | 0.033172 | 0.579607 | 4.127031 | Up | 0.001953 | 0.003239 |
| LOC100911777 | 1095 | 9      | 168     | 0.293585 | 5.119894 | 4.124263 | Up | 2.92E-06 | 6.06E-06 |
| G6pc         | 2293 | 11.5   | 214.5   | 0.179587 | 3.129272 | 4.123069 | Up | 8.84E-07 | 1.88E-06 |
| RGD1309621   | 5238 | 1599.5 | 29769.5 | 10.9005  | 189.7277 | 4.121465 | Up | 5.57E-12 | 1.51E-11 |
| Upk1a        | 1204 | 2      | 37      | 0.058964 | 1.026007 | 4.121054 | Up | 0.000115 | 0.000213 |
| LOC100361741 | 642  | 8      | 148.5   | 0.444111 | 7.712136 | 4.11814  | Up | 5.24E-06 | 1.07E-05 |
| RGD1566386   | 2940 | 47.5   | 883.5   | 0.578423 | 10.03048 | 4.116121 | Up | 0        | 0        |
| Pla2g4f      | 2583 | 11     | 204     | 0.151721 | 2.629156 | 4.115107 | Up | 8.84E-07 | 1.89E-06 |
| Slc7a14      | 2812 | 0.5    | 9.5     | 0.006465 | 0.111993 | 4.114715 | Up | 0.001953 | 0.003242 |
| Gal3st1      | 1858 | 2      | 37      | 0.038518 | 0.667283 | 4.114694 | Up | 0.000115 | 0.000213 |
| Nrg3         | 3601 | 1      | 19      | 0.010096 | 0.17441  | 4.110586 | Up | 0.000596 | 0.001031 |
| Gpr35        | 921  | 0.5    | 9       | 0.019115 | 0.330164 | 4.110409 | Up | 0.001953 | 0.003238 |
| LOC100911522 | 496  | 1      | 18      | 0.070987 | 1.22432  | 4.108272 | Up | 0.000615 | 0.001063 |
| Zmynd15      | 2879 | 36.5   | 676     | 0.45376  | 7.825593 | 4.108199 | Up | 2.57E-13 | 9.18E-13 |
| LOC100910729 | 4281 | 5      | 93      | 0.041927 | 0.722559 | 4.107162 | Up | 2.76E-05 | 5.40E-05 |
| RGD1559875   | 1704 | 1      | 18      | 0.020663 | 0.355847 | 4.106132 | Up | 0.000615 | 0.001063 |
| Camk4        | 1803 | 4      | 75      | 0.080658 | 1.388303 | 4.105358 | Up | 4.59E-05 | 8.83E-05 |
| Arpp21       | 3204 | 15.5   | 284.5   | 0.17284  | 2.970068 | 4.102985 | Up | 7.51E-08 | 1.68E-07 |
| Zfp385b      | 3803 | 3      | 56      | 0.02868  | 0.491155 | 4.098061 | Up | 7.36E-05 | 0.000139 |

|              |       |      |        |          |          |          |    |          |          |
|--------------|-------|------|--------|----------|----------|----------|----|----------|----------|
| Has1         | 2095  | 4    | 73.5   | 0.068321 | 1.168535 | 4.096223 | Up | 4.59E-05 | 8.84E-05 |
| Ccdc114      | 2618  | 2    | 36.5   | 0.027336 | 0.467024 | 4.094606 | Up | 0.000115 | 0.000213 |
| LOC100910982 | 968   | 5.5  | 100    | 0.201833 | 3.446261 | 4.093799 | Up | 2.76E-05 | 5.39E-05 |
| Eda2r        | 1082  | 90.5 | 1653.5 | 2.990575 | 50.99514 | 4.091865 | Up | 0        | 0        |
| Adipoq       | 1487  | 0.5  | 9      | 0.011839 | 0.201467 | 4.088899 | Up | 0.001953 | 0.003236 |
| Ostalpha     | 1603  | 0.5  | 9      | 0.010982 | 0.186888 | 4.088899 | Up | 0.001953 | 0.003236 |
| Emilin3      | 2440  | 2    | 37     | 0.029801 | 0.506644 | 4.087562 | Up | 0.000115 | 0.000213 |
| Kcna7        | 3592  | 1    | 18     | 0.009802 | 0.166304 | 4.084558 | Up | 0.000615 | 0.001063 |
| Dll3         | 1998  | 7.5  | 138.5  | 0.136474 | 2.305567 | 4.078424 | Up | 9.28E-06 | 1.86E-05 |
| Lrrc66       | 2598  | 12.5 | 223.5  | 0.170733 | 2.883797 | 4.07816  | Up | 4.81E-07 | 1.04E-06 |
| RGD1564786   | 682   | 4.5  | 82     | 0.237368 | 4.008971 | 4.078037 | Up | 4.59E-05 | 8.82E-05 |
| Gdf15        | 912   | 22   | 400    | 0.866965 | 14.58215 | 4.072087 | Up | 8.87E-10 | 2.13E-09 |
| Rnd1         | 1639  | 132  | 2387   | 2.891318 | 48.60233 | 4.071226 | Up | 1.14E-13 | 4.37E-13 |
| LOC100360291 | 846   | 9.5  | 170.5  | 0.399449 | 6.711112 | 4.070469 | Up | 2.92E-06 | 6.06E-06 |
| Kbtbd8       | 3510  | 53   | 950    | 0.538193 | 9.03324  | 4.069049 | Up | 4.04E-14 | 1.62E-13 |
| Adcy10       | 5177  | 3    | 53.5   | 0.020404 | 0.34233  | 4.068494 | Up | 7.36E-05 | 0.000139 |
| Casc1        | 2433  | 35   | 626    | 0.51264  | 8.57733  | 4.064512 | Up | 3.77E-13 | 1.30E-12 |
| Fgf12        | 732   | 5.5  | 98.5   | 0.268471 | 4.485862 | 4.062545 | Up | 2.76E-05 | 5.41E-05 |
| LOC365659    | 519   | 0.5  | 9      | 0.035026 | 0.58243  | 4.0556   | Up | 0.001953 | 0.003241 |
| Fbxo17       | 1639  | 1.5  | 26     | 0.032224 | 0.534568 | 4.052179 | Up | 0.000575 | 0.000999 |
| Dnah5        | 14532 | 8.5  | 150.5  | 0.020871 | 0.345738 | 4.050108 | Up | 5.24E-06 | 1.07E-05 |
| RGD1560958   | 649   | 4.5  | 79.5   | 0.24767  | 4.09461  | 4.047235 | Up | 4.59E-05 | 8.84E-05 |
| LOC100910746 | 1161  | 1    | 18     | 0.031315 | 0.517625 | 4.046983 | Up | 0.000615 | 0.001063 |
| Naip5        | 4209  | 6    | 106.5  | 0.05101  | 0.842966 | 4.046634 | Up | 1.62E-05 | 3.21E-05 |
| Rassf9       | 1790  | 57   | 1002   | 1.136583 | 18.72485 | 4.04218  | Up | 5.37E-14 | 2.13E-13 |



|              |      |      |       |          |          |          |    |          |          |
|--------------|------|------|-------|----------|----------|----------|----|----------|----------|
| Gpr156       | 2379 | 2    | 35    | 0.030083 | 0.49535  | 4.041449 | Up | 0.000115 | 0.000213 |
| Dlgap1       | 4181 | 60.5 | 1068  | 0.518271 | 8.525787 | 4.040053 | Up | 0        | 0        |
| Lrrc7        | 5109 | 3    | 52.5  | 0.0209   | 0.342113 | 4.032925 | Up | 7.36E-05 | 0.000139 |
| Smr3a        | 660  | 0.5  | 8.5   | 0.026674 | 0.436118 | 4.031209 | Up | 0.003906 | 0.006337 |
| Gcgr         | 1893 | 9    | 158   | 0.171641 | 2.789496 | 4.022539 | Up | 2.92E-06 | 6.06E-06 |
| LOC100912365 | 1059 | 35   | 608.5 | 1.181013 | 19.19039 | 4.022287 | Up | 3.77E-13 | 1.30E-12 |
| Tuba8        | 1478 | 0.5  | 8.5   | 0.011911 | 0.19353  | 4.022158 | Up | 0.003906 | 0.006336 |
| Plek2        | 1553 | 3    | 51    | 0.068016 | 1.101628 | 4.017611 | Up | 7.36E-05 | 0.000139 |
| Abca17       | 5322 | 1.5  | 26    | 0.010139 | 0.164122 | 4.016733 | Up | 0.000575 | 0.000999 |
| RGD1564013   | 837  | 49   | 853.5 | 2.102373 | 33.98207 | 4.014683 | Up | 3.91E-14 | 1.57E-13 |
| RGD1563155   | 555  | 1    | 17    | 0.063441 | 1.024281 | 4.01305  | Up | 0.000651 | 0.001123 |
| Hils1        | 797  | 5    | 86    | 0.223768 | 3.604851 | 4.009867 | Up | 2.76E-05 | 5.40E-05 |
| Tnfsf13b     | 1254 | 1    | 17.5  | 0.028993 | 0.467001 | 4.009671 | Up | 0.000651 | 0.001124 |
| Hnf1a        | 3538 | 1    | 17    | 0.009952 | 0.160168 | 4.008475 | Up | 0.000651 | 0.001124 |
| Ldhal6b      | 1442 | 1    | 17    | 0.024417 | 0.392355 | 4.006181 | Up | 0.000651 | 0.001123 |
| Tmprss9      | 3341 | 6    | 103   | 0.064262 | 1.031171 | 4.004173 | Up | 1.62E-05 | 3.20E-05 |
| LOC100912988 | 605  | 13   | 221.5 | 0.763209 | 12.23757 | 4.003095 | Up | 2.60E-07 | 5.70E-07 |
| Cdh16        | 2894 | 3    | 52    | 0.037292 | 0.596169 | 3.998783 | Up | 7.36E-05 | 0.000139 |
| Apoa1        | 889  | 10   | 170   | 0.403156 | 6.394554 | 3.987433 | Up | 1.61E-06 | 3.40E-06 |
| LOC501046    | 1543 | 26   | 440   | 0.601471 | 9.521126 | 3.984564 | Up | 6.87E-11 | 1.72E-10 |
| Sim1         | 7666 | 8    | 133.5 | 0.036893 | 0.581945 | 3.979446 | Up | 5.24E-06 | 1.07E-05 |
| Ppp1r1c      | 2848 | 2    | 33.5  | 0.024726 | 0.389715 | 3.978319 | Up | 0.000115 | 0.000213 |
| Ttll3        | 2906 | 37.5 | 629   | 0.45949  | 7.223126 | 3.974519 | Up | 1.86E-13 | 6.81E-13 |
| LOC100912479 | 1385 | 3    | 50    | 0.077095 | 1.211799 | 3.974373 | Up | 7.36E-05 | 0.000139 |
| Selplg       | 1263 | 3    | 51.5  | 0.086358 | 1.356746 | 3.973679 | Up | 7.36E-05 | 0.000139 |

|              |      |       |        |          |          |          |    |          |          |
|--------------|------|-------|--------|----------|----------|----------|----|----------|----------|
| RGD1564937   | 1639 | 1     | 16.5   | 0.021482 | 0.335834 | 3.966517 | Up | 0.00072  | 0.001238 |
| LOC100910797 | 621  | 142   | 2372.5 | 8.160156 | 127.4114 | 3.964753 | Up | 2.91E-13 | 1.03E-12 |
| RGD1564149   | 1532 | 1     | 17     | 0.023732 | 0.369893 | 3.962232 | Up | 0.000651 | 0.001123 |
| RGD1564894   | 1950 | 3     | 49.5   | 0.054757 | 0.853281 | 3.961904 | Up | 7.36E-05 | 0.000139 |
| Lhx4         | 1790 | 1     | 16.5   | 0.01967  | 0.305996 | 3.959422 | Up | 0.00072  | 0.001238 |
| Creb5        | 4148 | 153   | 2548.5 | 1.321118 | 20.49579 | 3.955497 | Up | 0        | 0        |
| Myoc         | 2068 | 2     | 33     | 0.034607 | 0.534944 | 3.950269 | Up | 0.000115 | 0.000213 |
| LOC100362676 | 3178 | 1     | 17     | 0.01144  | 0.176046 | 3.943783 | Up | 0.000651 | 0.001124 |
| RGD1561909   | 2286 | 244   | 4001.5 | 3.806088 | 58.41062 | 3.93985  | Up | 2.85E-13 | 1.01E-12 |
| Dscam        | 6656 | 1     | 17     | 0.005462 | 0.083515 | 3.934469 | Up | 0.000651 | 0.001123 |
| Isyna1       | 1881 | 19.5  | 320    | 0.372635 | 5.688932 | 3.932322 | Up | 6.02E-09 | 1.41E-08 |
| Galnt6       | 3387 | 1     | 16     | 0.010396 | 0.158249 | 3.928155 | Up | 0.00072  | 0.001237 |
| Msl1l        | 2307 | 7     | 113.5  | 0.108326 | 1.646274 | 3.925746 | Up | 9.28E-06 | 1.87E-05 |
| Gpr45        | 3470 | 1     | 16.5   | 0.010477 | 0.158626 | 3.920273 | Up | 0.00072  | 0.001238 |
| LOC687483    | 743  | 4     | 65     | 0.192642 | 2.914728 | 3.919368 | Up | 4.59E-05 | 8.84E-05 |
| Evc2         | 4067 | 1     | 16     | 0.008657 | 0.130905 | 3.918432 | Up | 0.00072  | 0.001238 |
| Asz1         | 1725 | 1     | 16.5   | 0.021076 | 0.318048 | 3.915548 | Up | 0.00072  | 0.001238 |
| Doc2g        | 1487 | 1     | 16     | 0.023678 | 0.356818 | 3.913546 | Up | 0.00072  | 0.001238 |
| Cdo1         | 1458 | 11    | 177    | 0.269576 | 4.058687 | 3.912248 | Up | 8.84E-07 | 1.88E-06 |
| Crb1         | 4603 | 18    | 290    | 0.140179 | 2.105404 | 3.908753 | Up | 1.14E-08 | 2.63E-08 |
| Lin7b        | 624  | 2     | 31.5   | 0.112852 | 1.694767 | 3.908584 | Up | 0.000115 | 0.000213 |
| Gpr22        | 4537 | 2     | 32.5   | 0.015774 | 0.236482 | 3.906116 | Up | 0.000115 | 0.000213 |
| LOC100365683 | 931  | 0.5   | 8      | 0.019526 | 0.29269  | 3.905936 | Up | 0.003906 | 0.006339 |
| RGD1562977   | 870  | 1     | 16     | 0.040471 | 0.605734 | 3.903723 | Up | 0.00072  | 0.001238 |
| Zfp455       | 2185 | 129.5 | 2066   | 2.109375 | 31.56066 | 3.90324  | Up | 0        | 0        |

|              |      |       |        |          |          |          |    |          |          |
|--------------|------|-------|--------|----------|----------|----------|----|----------|----------|
| Ephx1        | 1732 | 2     | 32     | 0.04132  | 0.617886 | 3.902423 | Up | 0.000115 | 0.000213 |
| Exd1         | 3435 | 11.5  | 184    | 0.120216 | 1.793384 | 3.898988 | Up | 8.84E-07 | 1.89E-06 |
| Ccdc30       | 2136 | 4     | 63.5   | 0.066473 | 0.990221 | 3.896913 | Up | 4.59E-05 | 8.85E-05 |
| RGD1564265   | 2764 | 19.5  | 309.5  | 0.251517 | 3.740944 | 3.894675 | Up | 6.02E-09 | 1.41E-08 |
| Pbld1        | 2010 | 2     | 32.5   | 0.036176 | 0.537822 | 3.894031 | Up | 0.000115 | 0.000213 |
| Cldn11       | 1873 | 16    | 252    | 0.303839 | 4.495343 | 3.88705  | Up | 4.01E-08 | 9.10E-08 |
| Sele         | 3351 | 1     | 16     | 0.010849 | 0.160486 | 3.886749 | Up | 0.00072  | 0.001238 |
| Slc24a1      | 3550 | 1     | 16     | 0.010241 | 0.15149  | 3.886749 | Up | 0.00072  | 0.001238 |
| Cox6b2       | 483  | 1     | 15.5   | 0.072898 | 1.077941 | 3.886253 | Up | 0.000849 | 0.001453 |
| LOC100362405 | 255  | 2.5   | 40     | 0.345194 | 5.103024 | 3.885873 | Up | 0.000115 | 0.000213 |
| LOC366632    | 756  | 1     | 15.5   | 0.046574 | 0.686304 | 3.881257 | Up | 0.000849 | 0.001451 |
| RGD1304624   | 1111 | 46.5  | 729    | 1.488129 | 21.91376 | 3.880265 | Up | 7.84E-14 | 3.07E-13 |
| Fam169b      | 1026 | 9     | 141    | 0.311093 | 4.580351 | 3.880038 | Up | 2.92E-06 | 6.06E-06 |
| LOC501223    | 1432 | 1     | 15.5   | 0.024588 | 0.361694 | 3.878752 | Up | 0.000849 | 0.001453 |
| Nup210l      | 5646 | 3     | 47     | 0.018912 | 0.278087 | 3.878175 | Up | 7.36E-05 | 0.000139 |
| LOC100912412 | 1194 | 3     | 47.5   | 0.090388 | 1.328579 | 3.877611 | Up | 7.36E-05 | 0.000139 |
| LOC100361584 | 3101 | 61    | 957.5  | 0.701491 | 10.30178 | 3.876326 | Up | 3.49E-14 | 1.41E-13 |
| LOC685796    | 1379 | 1     | 15.5   | 0.025533 | 0.374942 | 3.876243 | Up | 0.000849 | 0.001452 |
| Mdm2         | 2855 | 3202  | 50279  | 40.04198 | 587.6306 | 3.875324 | Up | 0        | 0        |
| Csrnp1       | 2872 | 465.5 | 7302.5 | 5.78455  | 84.81791 | 3.874092 | Up | 0        | 0        |
| RGD1562532   | 2433 | 1     | 15.5   | 0.014472 | 0.212144 | 3.873729 | Up | 0.000849 | 0.001453 |
| Runx1t1      | 3364 | 7.5   | 117.5  | 0.079523 | 1.160939 | 3.867783 | Up | 9.28E-06 | 1.87E-05 |
| Atp6v1c2     | 1595 | 16    | 248    | 0.356078 | 5.19005  | 3.865484 | Up | 4.01E-08 | 9.10E-08 |
| Ctsk         | 1446 | 9     | 138.5  | 0.219941 | 3.190057 | 3.858392 | Up | 2.92E-06 | 6.06E-06 |
| Mbp          | 1495 | 18    | 280    | 0.430451 | 6.239202 | 3.857439 | Up | 1.14E-08 | 2.63E-08 |

|              |       |       |        |          |          |          |    |          |          |
|--------------|-------|-------|--------|----------|----------|----------|----|----------|----------|
| LOC100910316 | 2327  | 6     | 93     | 0.092264 | 1.335098 | 3.855027 | Up | 1.62E-05 | 3.21E-05 |
| Dok3         | 1527  | 9     | 140.5  | 0.212405 | 3.07341  | 3.854949 | Up | 2.92E-06 | 6.06E-06 |
| LOC100360880 | 3251  | 187.5 | 2902   | 2.062459 | 29.80878 | 3.853299 | Up | 3.37E-13 | 1.18E-12 |
| LOC100360619 | 309   | 2     | 31     | 0.231607 | 3.346573 | 3.852936 | Up | 0.000115 | 0.000213 |
| RGD1565866   | 4989  | 1     | 16     | 0.007287 | 0.105269 | 3.852544 | Up | 0.00072  | 0.001237 |
| LOC680810    | 1019  | 3.5   | 54     | 0.122625 | 1.768388 | 3.850113 | Up | 7.36E-05 | 0.000139 |
| LOC100360238 | 2454  | 5     | 76.5   | 0.072674 | 1.043171 | 3.843386 | Up | 2.76E-05 | 5.41E-05 |
| Arid3a       | 2387  | 41    | 631.5  | 0.615107 | 8.810314 | 3.840285 | Up | 1.47E-13 | 5.48E-13 |
| Hmcn1        | 18310 | 0     | 8      | 0.001    | 0.014292 | 3.837179 | Up | 0.003906 | 0.006332 |
| Grm1         | 6820  | 5     | 76.5   | 0.02615  | 0.37351  | 3.836268 | Up | 2.76E-05 | 5.40E-05 |
| Oscar        | 2029  | 18    | 275.5  | 0.316881 | 4.525538 | 3.836077 | Up | 1.14E-08 | 2.63E-08 |
| Sema4d       | 4187  | 2     | 30     | 0.016819 | 0.240077 | 3.835368 | Up | 0.000116 | 0.000213 |
| Aox3         | 4728  | 40    | 608.5  | 0.301158 | 4.295881 | 3.834362 | Up | 1.16E-13 | 4.44E-13 |
| Clic2        | 1219  | 2     | 30     | 0.057768 | 0.823137 | 3.832782 | Up | 0.000116 | 0.000213 |
| Mab21l1      | 2390  | 1     | 15     | 0.014732 | 0.209164 | 3.827597 | Up | 0.000849 | 0.001452 |
| Krt17        | 1536  | 13.5  | 205.5  | 0.313941 | 4.450676 | 3.825459 | Up | 2.60E-07 | 5.70E-07 |
| Ccdc63       | 2122  | 1     | 15     | 0.016593 | 0.235157 | 3.824997 | Up | 0.000849 | 0.001451 |
| Il31ra       | 2444  | 2     | 30     | 0.028813 | 0.408349 | 3.824997 | Up | 0.000116 | 0.000213 |
| LOC688328    | 2718  | 1     | 15.5   | 0.013376 | 0.189568 | 3.824968 | Up | 0.000849 | 0.001451 |
| Btk          | 1983  | 1     | 15     | 0.017756 | 0.251186 | 3.822393 | Up | 0.000849 | 0.001452 |
| Cdh7         | 2361  | 4.5   | 68.5   | 0.068566 | 0.968465 | 3.820132 | Up | 4.59E-05 | 8.82E-05 |
| Ddit3        | 813   | 418   | 6313.5 | 18.38861 | 259.2675 | 3.817557 | Up | 5.87E-13 | 1.94E-12 |
| Rsph4a       | 2215  | 1     | 15     | 0.015896 | 0.224064 | 3.817169 | Up | 0.000849 | 0.001452 |
| LOC690930    | 651   | 6     | 90     | 0.328038 | 4.615688 | 3.814612 | Up | 1.62E-05 | 3.20E-05 |
| LOC680643    | 1072  | 3     | 44.5   | 0.098535 | 1.386346 | 3.814509 | Up | 7.36E-05 | 0.000139 |

|              |      |      |         |          |          |          |    |          |          |
|--------------|------|------|---------|----------|----------|----------|----|----------|----------|
| Tas1r1       | 2679 | 3    | 45      | 0.040285 | 0.565176 | 3.810391 | Up | 7.36E-05 | 0.000139 |
| Ces1d        | 1938 | 4.5  | 67.5    | 0.082644 | 1.156119 | 3.806234 | Up | 4.59E-05 | 8.81E-05 |
| Got1l1       | 1450 | 1.5  | 22.5    | 0.037215 | 0.520244 | 3.805236 | Up | 0.000578 | 0.001002 |
| Ncf1         | 2800 | 9    | 135.5   | 0.115632 | 1.61488  | 3.803815 | Up | 2.92E-06 | 6.07E-06 |
| Mok          | 1648 | 66.5 | 1000    | 1.448968 | 20.22294 | 3.802895 | Up | 0        | 0        |
| Vwde         | 5079 | 14   | 209     | 0.098635 | 1.375811 | 3.802044 | Up | 1.40E-07 | 3.11E-07 |
| LOC100911864 | 1115 | 68   | 1014    | 2.17921  | 30.3585  | 3.800223 | Up | 0        | 0        |
| Olr813       | 942  | 4.5  | 66      | 0.1682   | 2.336337 | 3.796002 | Up | 4.59E-05 | 8.81E-05 |
| Notch3       | 7319 | 2    | 30      | 0.009778 | 0.13562  | 3.793863 | Up | 0.000116 | 0.000213 |
| LOC691138    | 1545 | 1    | 15      | 0.023532 | 0.325891 | 3.791706 | Up | 0.000849 | 0.001453 |
| Teddm1       | 1258 | 1    | 15      | 0.0289   | 0.40024  | 3.791706 | Up | 0.000849 | 0.001453 |
| LOC100909587 | 2795 | 32   | 475     | 0.408862 | 5.659154 | 3.7909   | Up | 1.74E-12 | 5.25E-12 |
| Hao1         | 1527 | 4.5  | 67      | 0.10639  | 1.468446 | 3.78685  | Up | 4.59E-05 | 8.81E-05 |
| LOC100912425 | 573  | 1    | 15      | 0.06345  | 0.875571 | 3.786539 | Up | 0.000849 | 0.001452 |
| LOC299727    | 1248 | 1    | 15      | 0.029132 | 0.401284 | 3.783949 | Up | 0.000849 | 0.001452 |
| Lrcol1       | 806  | 1    | 15      | 0.045108 | 0.620226 | 3.781354 | Up | 0.000849 | 0.001451 |
| Naaladl1     | 2570 | 9    | 132.5   | 0.125088 | 1.719378 | 3.780874 | Up | 2.92E-06 | 6.06E-06 |
| LOC689561    | 1761 | 5    | 73      | 0.100622 | 1.382985 | 3.780764 | Up | 2.76E-05 | 5.40E-05 |
| Slc16a6      | 2034 | 41   | 601.5   | 0.719885 | 9.884522 | 3.779334 | Up | 1.47E-13 | 5.48E-13 |
| RGD1308065   | 1605 | 1    | 15      | 0.022652 | 0.310344 | 3.776149 | Up | 0.000849 | 0.001453 |
| Rhcg         | 1958 | 2    | 29      | 0.035965 | 0.492195 | 3.774561 | Up | 0.000116 | 0.000213 |
| Tmem22       | 1593 | 1    | 14.5    | 0.022103 | 0.301355 | 3.769162 | Up | 0.001094 | 0.00185  |
| LOC257650    | 1948 | 35   | 510     | 0.640862 | 8.728888 | 3.767712 | Up | 3.77E-13 | 1.30E-12 |
| Ctrc         | 898  | 4    | 57.5    | 0.158114 | 2.150325 | 3.765521 | Up | 4.59E-05 | 8.81E-05 |
| Abcb1b       | 3888 | 3902 | 56893.5 | 35.93288 | 488.3333 | 3.76449  | Up | 4.26E-12 | 1.19E-11 |

|            |       |        |        |          |          |          |    |          |          |
|------------|-------|--------|--------|----------|----------|----------|----|----------|----------|
| Cdk1       | 1861  | 10     | 144    | 0.189815 | 2.579527 | 3.764444 | Up | 1.61E-06 | 3.40E-06 |
| Actc1      | 1489  | 1      | 15     | 0.024417 | 0.330894 | 3.760423 | Up | 0.000849 | 0.001452 |
| LOC687615  | 1008  | 2      | 29     | 0.070998 | 0.961426 | 3.759316 | Up | 0.000116 | 0.000213 |
| Degs2      | 1317  | 1      | 14.5   | 0.026735 | 0.361776 | 3.758302 | Up | 0.001094 | 0.001849 |
| Wsb1       | 1890  | 2523   | 36355  | 47.54963 | 642.227  | 3.755577 | Up | 0        | 0        |
| Kin        | 1396  | 210    | 3043   | 5.388615 | 72.76559 | 3.75527  | Up | 0        | 0        |
| Lefty2     | 1384  | 83.5   | 1208.5 | 2.161166 | 29.15738 | 3.753979 | Up | 1.43E-13 | 5.34E-13 |
| Enthd1     | 2693  | 14.5   | 209    | 0.192136 | 2.591438 | 3.75355  | Up | 1.40E-07 | 3.11E-07 |
| Pspn       | 471   | 10.5   | 153.5  | 0.806847 | 10.87988 | 3.753225 | Up | 1.61E-06 | 3.40E-06 |
| Nlgn3      | 3166  | 19.5   | 283    | 0.220849 | 2.974121 | 3.751334 | Up | 6.02E-09 | 1.41E-08 |
| RGD1559708 | 492   | 2.5    | 37     | 0.182408 | 2.454087 | 3.749945 | Up | 0.000115 | 0.000213 |
| Fam71f2    | 1260  | 1      | 14     | 0.027944 | 0.37525  | 3.747229 | Up | 0.001094 | 0.001848 |
| Ush2a      | 15658 | 1.5    | 22     | 0.003483 | 0.046737 | 3.746214 | Up | 0.000578 | 0.001003 |
| Ccl7       | 807   | 1563.5 | 22326  | 68.97515 | 923.8311 | 3.74348  | Up | 3.52E-12 | 1.00E-11 |
| LOC498675  | 1023  | 12.5   | 178    | 0.435833 | 5.830355 | 3.741738 | Up | 4.81E-07 | 1.04E-06 |
| Psemb11    | 2616  | 45.5   | 646.5  | 0.618979 | 8.254252 | 3.737175 | Up | 2.49E-14 | 1.02E-13 |
| Egr4       | 2145  | 5      | 72     | 0.083678 | 1.115641 | 3.736878 | Up | 2.76E-05 | 5.41E-05 |
| Tnfsf18    | 603   | 142.5  | 2024   | 8.410115 | 112.0615 | 3.736022 | Up | 2.91E-13 | 1.03E-12 |
| Lrrc2      | 2528  | 2      | 28.5   | 0.02831  | 0.376216 | 3.732202 | Up | 0.000116 | 0.000214 |
| Pnpla3     | 3308  | 55     | 782.5  | 0.594078 | 7.893631 | 3.731964 | Up | 0        | 0        |
| LOC500350  | 1230  | 33     | 466.5  | 0.953977 | 12.66292 | 3.730512 | Up | 1.01E-12 | 3.19E-12 |
| Hhat1      | 1773  | 1.5    | 21     | 0.029788 | 0.394937 | 3.728803 | Up | 0.000581 | 0.001006 |
| Mterf      | 1506  | 192.5  | 2725.5 | 4.563796 | 60.41826 | 3.726679 | Up | 0        | 0        |
| Hal        | 2136  | 1      | 14     | 0.016484 | 0.217985 | 3.72509  | Up | 0.001094 | 0.001848 |
| Galr3      | 1163  | 1      | 14     | 0.030275 | 0.400357 | 3.72509  | Up | 0.001094 | 0.001849 |

|              |      |        |         |          |          |          |    |          |          |
|--------------|------|--------|---------|----------|----------|----------|----|----------|----------|
| Nr1d1        | 2344 | 1114.5 | 15824.5 | 17.06704 | 225.3012 | 3.72257  | Up | 3.05E-12 | 8.83E-12 |
| Zfp2         | 2106 | 18     | 253     | 0.304206 | 4.01513  | 3.722327 | Up | 1.14E-08 | 2.63E-08 |
| Matn4        | 2292 | 1      | 14      | 0.015362 | 0.202363 | 3.719501 | Up | 0.001094 | 0.00185  |
| Rbp1         | 695  | 1      | 14      | 0.050662 | 0.66736  | 3.719501 | Up | 0.001094 | 0.001849 |
| Gadd45a      | 1237 | 1170   | 16485.5 | 33.75702 | 444.6699 | 3.719476 | Up | 2.96E-12 | 8.57E-12 |
| LOC680627    | 3717 | 23     | 322.5   | 0.220031 | 2.894215 | 3.717396 | Up | 4.68E-10 | 1.13E-09 |
| Prodh        | 2182 | 1      | 14      | 0.016136 | 0.212152 | 3.716699 | Up | 0.001094 | 0.00185  |
| Tcte3        | 423  | 3      | 41.5    | 0.249715 | 3.276602 | 3.713847 | Up | 7.36E-05 | 0.000139 |
| LOC100366216 | 1055 | 9.5    | 133.5   | 0.320316 | 4.200463 | 3.712979 | Up | 2.92E-06 | 6.07E-06 |
| Tssk3        | 1003 | 2      | 28      | 0.071352 | 0.93024  | 3.704569 | Up | 0.000116 | 0.000214 |
| Kcnb2        | 3230 | 1      | 14.5    | 0.011256 | 0.146674 | 3.70386  | Up | 0.001094 | 0.001848 |
| Cd28         | 1284 | 453    | 6310    | 12.5923  | 164.0822 | 3.703805 | Up | 1.56E-12 | 4.76E-12 |
| Cercam       | 2750 | 20.5   | 286.5   | 0.267061 | 3.47388  | 3.701309 | Up | 3.18E-09 | 7.53E-09 |
| Usp51        | 2310 | 1      | 14      | 0.015739 | 0.204682 | 3.700986 | Up | 0.001094 | 0.001848 |
| Dapk2        | 1302 | 6      | 83      | 0.164019 | 2.131801 | 3.70014  | Up | 1.62E-05 | 3.20E-05 |
| LOC498601    | 463  | 8      | 111     | 0.615808 | 7.99835  | 3.69915  | Up | 5.24E-06 | 1.07E-05 |
| Bmpr1b       | 1529 | 38.5   | 535     | 0.900079 | 11.66916 | 3.696505 | Up | 1.45E-13 | 5.43E-13 |
| Qrich2       | 5940 | 4      | 56      | 0.02429  | 0.314758 | 3.695836 | Up | 4.59E-05 | 8.82E-05 |
| Flt3         | 3668 | 1      | 14      | 0.009912 | 0.128412 | 3.695483 | Up | 0.001094 | 0.00185  |
| Zfp51        | 2095 | 16     | 221.5   | 0.273285 | 3.520682 | 3.687377 | Up | 4.01E-08 | 9.10E-08 |
| Zfp36        | 1811 | 205.5  | 2843    | 4.073896 | 52.42424 | 3.685753 | Up | 4.23E-13 | 1.44E-12 |
| LOC292722    | 2296 | 1      | 14      | 0.015835 | 0.203578 | 3.684413 | Up | 0.001094 | 0.00185  |
| Frem3        | 6595 | 1      | 14      | 0.005513 | 0.070874 | 3.684413 | Up | 0.001094 | 0.001849 |
| Prkcg        | 3113 | 38     | 524.5   | 0.438459 | 5.634929 | 3.683883 | Up | 1.45E-13 | 5.43E-13 |
| lqcg         | 1643 | 3      | 41.5    | 0.065687 | 0.844128 | 3.683791 | Up | 7.36E-05 | 0.000139 |

|              |       |       |         |          |          |          |    |          |          |
|--------------|-------|-------|---------|----------|----------|----------|----|----------|----------|
| LOC100911521 | 811   | 20    | 274     | 0.879619 | 11.30097 | 3.683424 | Up | 3.18E-09 | 7.52E-09 |
| Calr4        | 1660  | 10    | 136     | 0.21418  | 2.746691 | 3.6808   | Up | 1.61E-06 | 3.40E-06 |
| Clk1         | 1791  | 1149  | 15750.5 | 22.88757 | 293.5026 | 3.680737 | Up | 3.45E-12 | 9.87E-12 |
| Dhh          | 2479  | 232   | 3178    | 3.337248 | 42.7718  | 3.679929 | Up | 3.80E-13 | 1.31E-12 |
| RGD1560556   | 1518  | 1     | 14      | 0.02395  | 0.306729 | 3.678847 | Up | 0.001094 | 0.00185  |
| Ddit4        | 1754  | 643.5 | 8810.5  | 13.11607 | 167.5313 | 3.675023 | Up | 0        | 0        |
| Ccdc62       | 2896  | 105.5 | 1446    | 1.30327  | 16.64611 | 3.674977 | Up | 0        | 0        |
| Shc2         | 3904  | 2     | 27.5    | 0.018332 | 0.234141 | 3.674976 | Up | 0.000116 | 0.000214 |
| Pou2af1      | 2527  | 4     | 54.5    | 0.056188 | 0.716672 | 3.67299  | Up | 4.59E-05 | 8.84E-05 |
| Itga2b       | 3317  | 4     | 54.5    | 0.043151 | 0.549783 | 3.671387 | Up | 4.59E-05 | 8.82E-05 |
| Tuba4a       | 1477  | 28    | 383     | 0.680685 | 8.670921 | 3.671127 | Up | 1.93E-11 | 4.97E-11 |
| MGC114499    | 2472  | 1     | 13.5    | 0.014243 | 0.181421 | 3.670969 | Up | 0.001551 | 0.002597 |
| Ddx3y        | 3087  | 308.5 | 4197.5  | 3.562538 | 45.36381 | 3.670565 | Up | 0        | 0        |
| Tas2r103     | 939   | 2.5   | 34.5    | 0.096186 | 1.223317 | 3.668835 | Up | 0.000115 | 0.000213 |
| Rgs9         | 2424  | 3     | 40.5    | 0.043576 | 0.55244  | 3.664197 | Up | 7.36E-05 | 0.000139 |
| Myo15        | 10224 | 4.5   | 61.5    | 0.015722 | 0.198938 | 3.661494 | Up | 4.59E-05 | 8.82E-05 |
| Pax8         | 2517  | 5     | 68      | 0.071311 | 0.901988 | 3.660913 | Up | 2.76E-05 | 5.40E-05 |
| LOC100910200 | 1329  | 216   | 2895.5  | 5.745022 | 72.62254 | 3.660033 | Up | 2.34E-13 | 8.42E-13 |
| Zfp819       | 2366  | 23    | 309     | 0.345185 | 4.361464 | 3.659373 | Up | 4.68E-10 | 1.13E-09 |
| Gsto2        | 1415  | 9     | 123     | 0.229623 | 2.899631 | 3.658531 | Up | 2.92E-06 | 6.06E-06 |
| LOC100910239 | 673   | 5     | 68      | 0.268405 | 3.382769 | 3.655722 | Up | 2.76E-05 | 5.41E-05 |
| RGD1563354   | 3762  | 3     | 41      | 0.028993 | 0.365061 | 3.654383 | Up | 7.36E-05 | 0.000139 |
| LOC100912866 | 798   | 2     | 27      | 0.089682 | 1.126245 | 3.650554 | Up | 0.000116 | 0.000214 |
| Ccdc11       | 1856  | 12    | 161.5   | 0.231975 | 2.907823 | 3.647898 | Up | 4.81E-07 | 1.04E-06 |
| Grin2d       | 5246  | 1     | 13.5    | 0.00693  | 0.086861 | 3.647704 | Up | 0.001551 | 0.002597 |



|              |       |         |          |          |          |          |    |          |          |
|--------------|-------|---------|----------|----------|----------|----------|----|----------|----------|
| Icam4        | 845   | 4       | 53.5     | 0.169388 | 2.120763 | 3.646179 | Up | 4.59E-05 | 8.84E-05 |
| Piwil1       | 4005  | 54      | 726      | 0.482471 | 6.039781 | 3.645983 | Up | 3.66E-14 | 1.48E-13 |
| Chka         | 2540  | 289     | 3872.5   | 4.065981 | 50.86082 | 3.644879 | Up | 0        | 0        |
| LOC100360982 | 2154  | 295.5   | 3971.5   | 4.914971 | 61.4595  | 3.644381 | Up | 3.74E-13 | 1.29E-12 |
| Ccl2         | 780   | 10072.5 | 134255.5 | 460.5772 | 5743.974 | 3.640534 | Up | 0        | 0        |
| Itih4        | 2992  | 8       | 105.5    | 0.094335 | 1.174986 | 3.638699 | Up | 5.24E-06 | 1.07E-05 |
| Slc12a8      | 2452  | 4       | 53.5     | 0.058842 | 0.73085  | 3.634665 | Up | 4.59E-05 | 8.83E-05 |
| RGD1565469   | 1118  | 4       | 53       | 0.127    | 1.577103 | 3.634376 | Up | 4.59E-05 | 8.81E-05 |
| Apcdd1l      | 2285  | 1       | 13.5     | 0.015911 | 0.197449 | 3.633386 | Up | 0.001551 | 0.002598 |
| Nt5c1b       | 1869  | 5       | 66.5     | 0.096035 | 1.191532 | 3.633112 | Up | 2.76E-05 | 5.40E-05 |
| LOC100909469 | 1274  | 3       | 40       | 0.084712 | 1.049664 | 3.631217 | Up | 7.36E-05 | 0.000139 |
| LOC100362123 | 3428  | 192     | 2537.5   | 1.99282  | 24.68483 | 3.630741 | Up | 0        | 0        |
| Tssk4        | 1376  | 2       | 27       | 0.052844 | 0.654465 | 3.630505 | Up | 0.000116 | 0.000214 |
| Grhl1        | 3427  | 27      | 359      | 0.28209  | 3.493278 | 3.630357 | Up | 3.64E-11 | 9.17E-11 |
| Zswim2       | 2079  | 1       | 13       | 0.016936 | 0.209201 | 3.62673  | Up | 0.001551 | 0.002598 |
| LOC100910996 | 1020  | 1       | 13       | 0.034519 | 0.426401 | 3.62673  | Up | 0.001551 | 0.002597 |
| LOC100363289 | 576   | 11.5    | 150      | 0.704964 | 8.681982 | 3.622402 | Up | 8.84E-07 | 1.89E-06 |
| RGD1564480   | 1671  | 17      | 225      | 0.365758 | 4.49984  | 3.620911 | Up | 2.14E-08 | 4.89E-08 |
| LOC686545    | 3169  | 1       | 13       | 0.011111 | 0.136677 | 3.620746 | Up | 0.001551 | 0.002596 |
| Nkpd1        | 2754  | 4       | 53       | 0.051973 | 0.638925 | 3.61982  | Up | 4.59E-05 | 8.83E-05 |
| LOC100365826 | 543   | 2       | 26.5     | 0.131798 | 1.616943 | 3.616866 | Up | 0.000117 | 0.000216 |
| RGD1562118   | 609   | 1       | 13       | 0.057816 | 0.708257 | 3.614738 | Up | 0.001551 | 0.002595 |
| Hydin        | 15586 | 1       | 13       | 0.002259 | 0.027674 | 3.614738 | Up | 0.001551 | 0.002596 |
| Tmprss7      | 2590  | 1       | 13       | 0.013595 | 0.166536 | 3.614738 | Up | 0.001551 | 0.002596 |
| LOC100909569 | 2319  | 42.5    | 551      | 0.650725 | 7.95491  | 3.611725 | Up | 1.10E-13 | 4.23E-13 |

|              |        |       |        |          |          |          |    |          |          |
|--------------|--------|-------|--------|----------|----------|----------|----|----------|----------|
| LOC100912483 | 729    | 9     | 116.5  | 0.436262 | 5.332392 | 3.611516 | Up | 2.92E-06 | 6.05E-06 |
| Ccrn4l       | 2609   | 116.5 | 1527   | 1.597723 | 19.52137 | 3.610965 | Up | 9.68E-14 | 3.74E-13 |
| Rrad         | 1471   | 8     | 104    | 0.193047 | 2.358007 | 3.610544 | Up | 5.24E-06 | 1.07E-05 |
| Rwdd2a       | 1513   | 337   | 4401   | 7.940662 | 96.92667 | 3.609562 | Up | 0        | 0        |
| Sorl1        | 10537  | 10    | 131.5  | 0.03396  | 0.414484 | 3.609424 | Up | 1.61E-06 | 3.40E-06 |
| Eif2c4       | 3737   | 1     | 13     | 0.009422 | 0.114939 | 3.608705 | Up | 0.001551 | 0.002599 |
| LOC100360244 | 378    | 4     | 53     | 0.384727 | 4.693125 | 3.608643 | Up | 4.59E-05 | 8.84E-05 |
| Rtp3         | 1964   | 4     | 52.5   | 0.073462 | 0.895447 | 3.607534 | Up | 4.59E-05 | 8.82E-05 |
| Ptchd3       | 2718   | 2     | 26     | 0.026331 | 0.320698 | 3.606405 | Up | 0.000117 | 0.000216 |
| Olr1         | 3751   | 90    | 1168.5 | 0.8549   | 10.41075 | 3.606176 | Up | 0        | 0        |
| Bbs7         | 2719   | 540.5 | 7025.5 | 7.094131 | 86.27642 | 3.604269 | Up | 7.21E-13 | 2.32E-12 |
| Gcfc2        | 2583   | 290   | 3769   | 4.008595 | 48.71099 | 3.603079 | Up | 2.80E-13 | 9.94E-13 |
| Tas2r139     | 960    | 3.5   | 46     | 0.130758 | 1.588534 | 3.602721 | Up | 7.36E-05 | 0.000139 |
| Wwc1         | 4453   | 69    | 895    | 0.552536 | 6.705501 | 3.601205 | Up | 0        | 0        |
| Fam212b      | 3374   | 205   | 2664.5 | 2.174144 | 26.37502 | 3.600652 | Up | 4.23E-13 | 1.44E-12 |
| LOC291746    | 1959   | 1     | 13     | 0.017973 | 0.217421 | 3.596562 | Up | 0.001551 | 0.002598 |
| Yod1         | 912    | 58.5  | 757.5  | 2.296249 | 27.72441 | 3.593805 | Up | 1.35E-14 | 5.59E-14 |
| Kif9         | 2373   | 5     | 65     | 0.076122 | 0.918307 | 3.5926   | Up | 2.76E-05 | 5.39E-05 |
| Myh7         | 5925   | 1     | 13.5   | 0.006136 | 0.074021 | 3.59252  | Up | 0.001551 | 0.002596 |
| Vom2r60      | 2595   | 1     | 13     | 0.01401  | 0.16899  | 3.592379 | Up | 0.001551 | 0.002597 |
| Tctex1d1     | 979    | 5     | 64     | 0.182168 | 2.191784 | 3.588762 | Up | 2.76E-05 | 5.41E-05 |
| LOC680875    | 2680   | 1     | 13     | 0.013566 | 0.162958 | 3.586445 | Up | 0.001551 | 0.002595 |
| Dlgap2       | 3718   | 2.5   | 32     | 0.023984 | 0.288079 | 3.586339 | Up | 0.000115 | 0.000213 |
| Ttn          | 106973 | 938.5 | 11966  | 0.312276 | 3.739251 | 3.581856 | Up | 5.56E-13 | 1.84E-12 |
| Sfxn2        | 2110   | 114   | 1458   | 1.927333 | 23.00913 | 3.577529 | Up | 7.79E-14 | 3.06E-13 |

|              |      |       |         |          |          |          |    |          |          |
|--------------|------|-------|---------|----------|----------|----------|----|----------|----------|
| Mip          | 2431 | 479.5 | 6080    | 7.020874 | 83.57356 | 3.573324 | Up | 0        | 0        |
| LOC100362099 | 296  | 3     | 38.5    | 0.360731 | 4.292371 | 3.572781 | Up | 7.36E-05 | 0.000139 |
| RGD1307315   | 1700 | 185   | 2359.5  | 3.895744 | 46.34767 | 3.572526 | Up | 0        | 0        |
| LOC303590    | 2421 | 14    | 178.5   | 0.206925 | 2.459189 | 3.571003 | Up | 1.40E-07 | 3.11E-07 |
| LOC684871    | 1318 | 54.5  | 691.5   | 1.474217 | 17.50678 | 3.569892 | Up | 3.66E-14 | 1.48E-13 |
| Slc37a2      | 1521 | 20    | 255.5   | 0.470899 | 5.589138 | 3.569135 | Up | 3.18E-09 | 7.52E-09 |
| LOC498836    | 372  | 1     | 12.5    | 0.09465  | 1.123078 | 3.568712 | Up | 0.002405 | 0.003964 |
| Inca1        | 1287 | 1     | 13      | 0.028249 | 0.335143 | 3.568495 | Up | 0.001551 | 0.002598 |
| Tmem72       | 3368 | 2     | 26      | 0.021589 | 0.256133 | 3.568495 | Up | 0.000117 | 0.000216 |
| Olr1l        | 975  | 1.5   | 19      | 0.054757 | 0.648769 | 3.566587 | Up | 0.000596 | 0.001031 |
| Scml4        | 4333 | 44    | 557     | 0.362307 | 4.292027 | 3.566376 | Up | 8.13E-14 | 3.18E-13 |
| RGD1311186   | 2217 | 1038  | 13129.5 | 16.67586 | 197.4773 | 3.565853 | Up | 2.62E-14 | 1.07E-13 |
| Btnl5        | 1944 | 2     | 25      | 0.036224 | 0.428894 | 3.565601 | Up | 0.000118 | 0.000218 |
| RGD1563866   | 993  | 28    | 356     | 1.011303 | 11.95136 | 3.562887 | Up | 1.93E-11 | 4.98E-11 |
| RGD1564613   | 729  | 21.5  | 269.5   | 1.047076 | 12.32839 | 3.557546 | Up | 1.68E-09 | 4.01E-09 |
| Trmt13       | 1824 | 174.5 | 2190    | 3.406836 | 40.07726 | 3.556279 | Up | 1.43E-13 | 5.33E-13 |
| Actr3        | 1116 | 2     | 25      | 0.064128 | 0.753558 | 3.5547   | Up | 0.000118 | 0.000218 |
| Rhoh         | 1556 | 4.5   | 56      | 0.102196 | 1.200425 | 3.55413  | Up | 4.59E-05 | 8.84E-05 |
| Dsg4         | 3123 | 3     | 37      | 0.033823 | 0.396994 | 3.553038 | Up | 7.36E-05 | 0.000139 |
| Asb16        | 1402 | 3     | 37      | 0.075342 | 0.884317 | 3.553038 | Up | 7.36E-05 | 0.000139 |
| Acer2        | 5156 | 583.5 | 7302    | 4.031039 | 47.23662 | 3.550682 | Up | 5.08E-13 | 1.70E-12 |
| Wdr78        | 2669 | 118.5 | 1490    | 1.589909 | 18.62677 | 3.550361 | Up | 0        | 0        |
| Gabbr2       | 5459 | 11    | 136.5   | 0.071369 | 0.834906 | 3.548251 | Up | 8.84E-07 | 1.89E-06 |
| Pklr         | 2922 | 34    | 427     | 0.416565 | 4.871515 | 3.547757 | Up | 5.99E-13 | 1.97E-12 |
| Mapk13       | 1904 | 13.5  | 170     | 0.254769 | 2.975766 | 3.545998 | Up | 2.60E-07 | 5.69E-07 |

|            |       |       |         |          |          |          |    |          |          |
|------------|-------|-------|---------|----------|----------|----------|----|----------|----------|
| LOC498222  | 2866  | 2     | 25      | 0.024971 | 0.290918 | 3.542294 | Up | 0.000118 | 0.000218 |
| Kbtbd10    | 2316  | 17    | 211     | 0.261667 | 3.047158 | 3.541659 | Up | 2.14E-08 | 4.90E-08 |
| Dnahc3l    | 12261 | 19    | 237.5   | 0.055591 | 0.647045 | 3.540942 | Up | 6.02E-09 | 1.41E-08 |
| Slc16a8    | 1829  | 3     | 37.5    | 0.058693 | 0.682316 | 3.539176 | Up | 7.36E-05 | 0.000139 |
| Naaa       | 1830  | 13.5  | 170     | 0.266952 | 3.099048 | 3.537175 | Up | 2.60E-07 | 5.70E-07 |
| RGD1304931 | 3861  | 5.5   | 68      | 0.05075  | 0.588708 | 3.53606  | Up | 2.76E-05 | 5.40E-05 |
| Lvrn       | 2964  | 9     | 112     | 0.109234 | 1.265831 | 3.534592 | Up | 2.92E-06 | 6.06E-06 |
| Mixl1      | 2342  | 32    | 396     | 0.487212 | 5.641024 | 3.533337 | Up | 1.74E-12 | 5.25E-12 |
| RGD1359452 | 1846  | 78.5  | 973.5   | 1.521504 | 17.58798 | 3.531019 | Up | 0        | 0        |
| Park2      | 1564  | 3     | 37.5    | 0.069005 | 0.79735  | 3.530449 | Up | 7.36E-05 | 0.000139 |
| Trpc4      | 2875  | 1.5   | 18.5    | 0.018769 | 0.216872 | 3.5304   | Up | 0.000615 | 0.001063 |
| RGD1310371 | 1416  | 1     | 12      | 0.024866 | 0.286753 | 3.52758  | Up | 0.002405 | 0.003968 |
| Kcnj14     | 2751  | 106.5 | 1317.5  | 1.387264 | 15.96513 | 3.524611 | Up | 0        | 0        |
| Ptgs2      | 1815  | 991   | 12208   | 19.53563 | 224.5495 | 3.522854 | Up | 2.91E-12 | 8.45E-12 |
| lfrd1      | 1736  | 2226  | 27397.5 | 45.82818 | 526.2494 | 3.52144  | Up | 0        | 0        |
| Ebpl       | 1118  | 6.5   | 80.5    | 0.209324 | 2.403567 | 3.521365 | Up | 1.62E-05 | 3.21E-05 |
| Dnahc6     | 12656 | 1     | 12      | 0.002782 | 0.031941 | 3.52117  | Up | 0.002405 | 0.003964 |
| LOC497899  | 1127  | 15    | 185.5   | 0.479825 | 5.500536 | 3.518993 | Up | 7.51E-08 | 1.68E-07 |
| Slc44a4    | 2254  | 2     | 24.5    | 0.031496 | 0.360704 | 3.517553 | Up | 0.000121 | 0.000223 |
| Zfp498     | 1849  | 298   | 3655.5  | 5.766809 | 65.9865  | 3.516326 | Up | 5.55E-13 | 1.84E-12 |
| Kctd16     | 1393  | 1     | 12.5    | 0.0261   | 0.298625 | 3.51624  | Up | 0.002405 | 0.003969 |
| Areg       | 1154  | 198.5 | 2431    | 6.153846 | 70.28617 | 3.513681 | Up | 0        | 0        |
| Plcg2      | 4321  | 28    | 343.5   | 0.232936 | 2.660037 | 3.513439 | Up | 1.93E-11 | 4.98E-11 |
| Lama1      | 10570 | 1472  | 17885   | 4.958129 | 56.4926  | 3.510194 | Up | 3.92E-12 | 1.10E-11 |
| RGD1559859 | 906   | 68    | 829     | 2.690148 | 30.51254 | 3.503645 | Up | 0        | 0        |

|              |      |       |         |          |          |          |    |          |          |
|--------------|------|-------|---------|----------|----------|----------|----|----------|----------|
| Nm1l         | 620  | 2     | 24      | 0.11358  | 1.288038 | 3.503394 | Up | 0.000121 | 0.000223 |
| LOC685289    | 578  | 1     | 12      | 0.060917 | 0.690037 | 3.501767 | Up | 0.002405 | 0.003968 |
| Fam184b      | 2847 | 6     | 73      | 0.075413 | 0.853859 | 3.501122 | Up | 1.62E-05 | 3.21E-05 |
| Lcp2         | 3407 | 29    | 354.5   | 0.307276 | 3.474839 | 3.49934  | Up | 1.04E-11 | 2.73E-11 |
| Pex11b       | 1456 | 1575  | 18951.5 | 38.45537 | 434.5337 | 3.498211 | Up | 4.40E-12 | 1.22E-11 |
| Omg          | 1855 | 1.5   | 18.5    | 0.028781 | 0.324963 | 3.497102 | Up | 0.000615 | 0.001063 |
| Olr1105      | 918  | 1     | 12      | 0.038355 | 0.432507 | 3.495241 | Up | 0.002405 | 0.003967 |
| Ppp1r14d     | 757  | 1     | 12      | 0.046512 | 0.524494 | 3.495241 | Up | 0.002405 | 0.003967 |
| Ldlrad1      | 1776 | 12.5  | 149.5   | 0.249108 | 2.807139 | 3.494256 | Up | 4.81E-07 | 1.04E-06 |
| Aldob        | 1589 | 21.5  | 259     | 0.482903 | 5.440204 | 3.493856 | Up | 1.68E-09 | 4.01E-09 |
| Nlgn1        | 3322 | 1     | 12.5    | 0.010944 | 0.123054 | 3.49105  | Up | 0.002405 | 0.003967 |
| Slc39a8      | 3097 | 10.5  | 127     | 0.121596 | 1.366492 | 3.490304 | Up | 1.61E-06 | 3.40E-06 |
| LOC691995    | 1491 | 8.5   | 101.5   | 0.20188  | 2.26768  | 3.489645 | Up | 5.24E-06 | 1.07E-05 |
| Zfp347       | 4884 | 507.5 | 6081.5  | 3.69977  | 41.55601 | 3.48955  | Up | 9.98E-13 | 3.15E-12 |
| LOC100360692 | 867  | 2     | 23.5    | 0.081222 | 0.90962  | 3.485318 | Up | 0.000126 | 0.000231 |
| Cd27         | 1602 | 1     | 12      | 0.022337 | 0.250088 | 3.484957 | Up | 0.002405 | 0.003964 |
| Serpnb7      | 1143 | 5     | 60      | 0.157034 | 1.757313 | 3.484225 | Up | 2.76E-05 | 5.40E-05 |
| Rab30        | 1336 | 295.5 | 3533.5  | 7.888662 | 88.26388 | 3.483971 | Up | 3.74E-13 | 1.29E-12 |
| Nags         | 2111 | 2.5   | 30.5    | 0.043056 | 0.481737 | 3.483954 | Up | 0.000116 | 0.000213 |
| C4a          | 5377 | 13    | 157     | 0.087047 | 0.973671 | 3.483576 | Up | 2.60E-07 | 5.70E-07 |
| Serpinc1     | 1561 | 8     | 96      | 0.183386 | 2.050951 | 3.483336 | Up | 5.24E-06 | 1.07E-05 |
| Ankrd61      | 1472 | 5     | 60      | 0.121936 | 1.363321 | 3.482931 | Up | 2.76E-05 | 5.39E-05 |
| Trim71       | 2568 | 7     | 84      | 0.097763 | 1.091391 | 3.480732 | Up | 9.28E-06 | 1.87E-05 |
| Dqx1         | 2606 | 66    | 786.5   | 0.901851 | 10.05985 | 3.479576 | Up | 0        | 0        |
| Tigd3        | 1586 | 17.5  | 207.5   | 0.391399 | 4.365519 | 3.479441 | Up | 2.14E-08 | 4.90E-08 |

|              |       |        |         |          |          |          |    |          |          |
|--------------|-------|--------|---------|----------|----------|----------|----|----------|----------|
| Nkx2-1       | 2297  | 35.5   | 421     | 0.549158 | 6.117261 | 3.477592 | Up | 3.77E-13 | 1.30E-12 |
| Ppp1r15a     | 2033  | 2052.5 | 24530.5 | 36.17624 | 402.756  | 3.476792 | Up | 0        | 0        |
| Dnah1        | 12872 | 24     | 287     | 0.066807 | 0.742939 | 3.475165 | Up | 2.47E-10 | 6.04E-10 |
| Xkr4         | 3727  | 1      | 12      | 0.009755 | 0.108463 | 3.474927 | Up | 0.002405 | 0.003966 |
| Baiap2l2     | 2079  | 1      | 12      | 0.017488 | 0.194441 | 3.474927 | Up | 0.002405 | 0.003966 |
| LOC100911717 | 786   | 49.5   | 589.5   | 2.256807 | 25.02694 | 3.471127 | Up | 3.91E-14 | 1.57E-13 |
| Tspan33      | 1983  | 4      | 47      | 0.071602 | 0.793586 | 3.470321 | Up | 4.59E-05 | 8.83E-05 |
| Apoc3        | 536   | 1      | 12      | 0.06783  | 0.750824 | 3.468488 | Up | 0.002405 | 0.003966 |
| Syt4         | 3877  | 1      | 12      | 0.009378 | 0.103802 | 3.468488 | Up | 0.002405 | 0.003965 |
| Krt5         | 2088  | 3      | 36      | 0.052237 | 0.577359 | 3.466336 | Up | 7.36E-05 | 0.000139 |
| Tsga13       | 1134  | 5.5    | 65      | 0.172793 | 1.909738 | 3.466255 | Up | 2.76E-05 | 5.40E-05 |
| RGD1307443   | 4098  | 5      | 59      | 0.043799 | 0.483973 | 3.465947 | Up | 2.76E-05 | 5.41E-05 |
| Lin28a       | 3520  | 25.5   | 300.5   | 0.257678 | 2.846758 | 3.465681 | Up | 1.30E-10 | 3.22E-10 |
| Micb         | 1202  | 12     | 141.5   | 0.356283 | 3.935178 | 3.465334 | Up | 4.81E-07 | 1.04E-06 |
| Art4         | 2436  | 3      | 35      | 0.043362 | 0.478587 | 3.464284 | Up | 7.36E-05 | 0.000139 |
| Acap1        | 2468  | 94     | 1110    | 1.363359 | 15.03892 | 3.463464 | Up | 0        | 0        |
| Ret          | 3928  | 1      | 12      | 0.009256 | 0.101996 | 3.462021 | Up | 0.002405 | 0.003965 |
| Ttc39a       | 2647  | 5      | 59      | 0.067809 | 0.747232 | 3.462014 | Up | 2.76E-05 | 5.39E-05 |
| LOC690286    | 1376  | 13.5   | 159.5   | 0.350863 | 3.855993 | 3.458124 | Up | 2.60E-07 | 5.70E-07 |
| LOC100911221 | 1524  | 162.5  | 1904.5  | 3.795339 | 41.68978 | 3.457393 | Up | 0        | 0        |
| Cyp4f17      | 2156  | 629    | 7358.5  | 10.37598 | 113.9539 | 3.457131 | Up | 1.00E-12 | 3.16E-12 |
| Spata4       | 1086  | 1      | 11.5    | 0.032422 | 0.355615 | 3.455293 | Up | 0.003992 | 0.006452 |
| LOC691257    | 3291  | 118.5  | 1393.5  | 1.286976 | 14.10312 | 3.453957 | Up | 0        | 0        |
| Cadps2       | 4949  | 4      | 47      | 0.02869  | 0.314342 | 3.453724 | Up | 4.59E-05 | 8.85E-05 |
| Shd          | 1459  | 11.5   | 135     | 0.281065 | 3.076915 | 3.45251  | Up | 8.84E-07 | 1.89E-06 |

|              |      |       |        |          |          |          |    |          |          |
|--------------|------|-------|--------|----------|----------|----------|----|----------|----------|
| Cxcl3        | 674  | 312.5 | 3671.5 | 16.59302 | 181.6159 | 3.452242 | Up | 1.77E-13 | 6.50E-13 |
| Fam83h       | 4523 | 9     | 106    | 0.071456 | 0.780456 | 3.449188 | Up | 2.92E-06 | 6.07E-06 |
| Accsl        | 2167 | 1     | 11.5   | 0.016248 | 0.177387 | 3.448553 | Up | 0.003992 | 0.006457 |
| Fibcd1       | 4695 | 2     | 23     | 0.015243 | 0.166048 | 3.445373 | Up | 0.000126 | 0.000231 |
| Cd99l2       | 4174 | 1     | 11.5   | 0.008436 | 0.091878 | 3.445171 | Up | 0.003992 | 0.006459 |
| Fam59b       | 2662 | 10    | 117    | 0.134422 | 1.463019 | 3.444103 | Up | 1.61E-06 | 3.40E-06 |
| Pld5         | 1720 | 5     | 58     | 0.104354 | 1.134207 | 3.44212  | Up | 2.76E-05 | 5.40E-05 |
| Igfals       | 2190 | 3.5   | 40.5   | 0.057057 | 0.620099 | 3.442025 | Up | 7.36E-05 | 0.000139 |
| LOC100909560 | 886  | 4.5   | 52     | 0.178831 | 1.943243 | 3.4418   | Up | 4.59E-05 | 8.83E-05 |
| LOC100912741 | 551  | 63    | 729    | 4.072635 | 44.22139 | 3.44071  | Up | 0        | 0        |
| Cygb         | 2138 | 2     | 23     | 0.033205 | 0.360429 | 3.440227 | Up | 0.000126 | 0.000231 |
| LOC100909666 | 4718 | 9     | 104    | 0.068138 | 0.737861 | 3.436815 | Up | 2.92E-06 | 6.07E-06 |
| Hpx          | 1484 | 7.5   | 86     | 0.179106 | 1.939061 | 3.43647  | Up | 9.28E-06 | 1.87E-05 |
| Pde5a        | 3397 | 2     | 24     | 0.021405 | 0.231111 | 3.432553 | Up | 0.000121 | 0.000223 |
| LOC501230    | 300  | 5     | 58.5   | 0.602122 | 6.493928 | 3.430965 | Up | 2.76E-05 | 5.41E-05 |
| Cplx3        | 3391 | 29.5  | 341    | 0.310366 | 3.347302 | 3.430956 | Up | 1.04E-11 | 2.73E-11 |
| LOC687399    | 1485 | 77.5  | 897.5  | 1.866896 | 20.1258  | 3.430333 | Up | 0        | 0        |
| Serpinf2     | 2197 | 6     | 69     | 0.097724 | 1.053478 | 3.430305 | Up | 1.62E-05 | 3.20E-05 |
| LOC100910689 | 1068 | 53    | 610.5  | 1.767706 | 19.0558  | 3.43028  | Up | 4.04E-14 | 1.62E-13 |
| RGD1562299   | 927  | 1     | 12     | 0.03922  | 0.422483 | 3.429241 | Up | 0.002405 | 0.003965 |
| Ptgir        | 1360 | 4     | 46     | 0.105245 | 1.130583 | 3.425247 | Up | 4.59E-05 | 8.80E-05 |
| LOC100912582 | 3480 | 35    | 400    | 0.357747 | 3.838082 | 3.423375 | Up | 3.77E-13 | 1.30E-12 |
| Sarm1        | 4039 | 2     | 23.5   | 0.018003 | 0.192582 | 3.419181 | Up | 0.000126 | 0.000231 |
| Zc3h6        | 5324 | 106   | 1213.5 | 0.712008 | 7.597942 | 3.415644 | Up | 0        | 0        |
| LOC100909559 | 798  | 10    | 113.5  | 0.445537 | 4.749189 | 3.414064 | Up | 1.61E-06 | 3.40E-06 |

|              |       |       |        |          |          |          |    |          |          |
|--------------|-------|-------|--------|----------|----------|----------|----|----------|----------|
| Rp1          | 6991  | 2     | 23     | 0.010237 | 0.10894  | 3.411671 | Up | 0.000126 | 0.000231 |
| Micalcl      | 2352  | 36.5  | 418    | 0.559089 | 5.937367 | 3.408675 | Up | 2.57E-13 | 9.18E-13 |
| LOC100910258 | 1764  | 1     | 11     | 0.01996  | 0.211766 | 3.407273 | Up | 0.003992 | 0.006458 |
| Sec14l3      | 1595  | 870   | 9887   | 19.46096 | 206.4254 | 3.406965 | Up | 0        | 0        |
| Tspyl3       | 2100  | 1     | 11.5   | 0.017313 | 0.183475 | 3.405684 | Up | 0.003992 | 0.006457 |
| Adam4l1      | 2464  | 8.5   | 96     | 0.122859 | 1.297497 | 3.400659 | Up | 5.24E-06 | 1.07E-05 |
| Hspa1l       | 2632  | 39    | 440.5  | 0.530005 | 5.590631 | 3.398934 | Up | 1.32E-13 | 4.99E-13 |
| Fas          | 2554  | 397   | 4481   | 5.550782 | 58.54201 | 3.398709 | Up | 6.21E-13 | 2.04E-12 |
| Gck          | 2220  | 1     | 11     | 0.01586  | 0.167052 | 3.396807 | Up | 0.003992 | 0.006453 |
| Myom3        | 4752  | 373.5 | 4202   | 2.802673 | 29.51407 | 3.396528 | Up | 3.81E-13 | 1.31E-12 |
| LOC100910088 | 3102  | 3     | 34     | 0.034422 | 0.36246  | 3.39643  | Up | 7.36E-05 | 0.000139 |
| Dnhd1-ps1    | 14585 | 94    | 1055.5 | 0.229443 | 2.411198 | 3.393545 | Up | 0        | 0        |
| RGD1564567   | 1956  | 2     | 22     | 0.036002 | 0.378277 | 3.393301 | Up | 0.000135 | 0.000247 |
| Tulp2        | 1605  | 2     | 23     | 0.045304 | 0.475636 | 3.392141 | Up | 0.000126 | 0.000231 |
| Zc3h8        | 1561  | 132.5 | 1479.5 | 3.025395 | 31.63359 | 3.386262 | Up | 1.14E-13 | 4.37E-13 |
| Nat8b        | 916   | 10    | 111.5  | 0.389395 | 4.06155  | 3.382725 | Up | 1.61E-06 | 3.40E-06 |
| LOC100362345 | 1375  | 220.5 | 2469   | 5.743959 | 59.8249  | 3.380629 | Up | 3.61E-13 | 1.25E-12 |
| LOC688297    | 862   | 5     | 55.5   | 0.206894 | 2.153269 | 3.379564 | Up | 2.76E-05 | 5.41E-05 |
| Kcnh3        | 3715  | 1     | 11     | 0.009478 | 0.098615 | 3.379193 | Up | 0.003992 | 0.006454 |
| LOC690995    | 1083  | 1     | 11     | 0.032511 | 0.338278 | 3.379193 | Up | 0.003992 | 0.006451 |
| LOC100362120 | 708   | 1     | 11     | 0.049731 | 0.51745  | 3.379193 | Up | 0.003992 | 0.006455 |
| P2ry6        | 2530  | 18    | 200    | 0.254358 | 2.645321 | 3.378513 | Up | 1.14E-08 | 2.63E-08 |
| Cnr2         | 3286  | 444.5 | 4908.5 | 4.813467 | 49.93123 | 3.374794 | Up | 1.07E-12 | 3.36E-12 |
| Pramef12     | 1672  | 1     | 11     | 0.021058 | 0.218035 | 3.372087 | Up | 0.003992 | 0.006458 |
| RGD1562146   | 666   | 3     | 33.5   | 0.162047 | 1.67734  | 3.371693 | Up | 7.37E-05 | 0.000139 |



|              |      |       |        |          |          |          |    |          |          |
|--------------|------|-------|--------|----------|----------|----------|----|----------|----------|
| Dnai2        | 2923 | 29.5  | 327.5  | 0.36202  | 3.744896 | 3.370783 | Up | 1.04E-11 | 2.73E-11 |
| B3gnt4       | 1414 | 3     | 33.5   | 0.076325 | 0.789398 | 3.37053  | Up | 7.37E-05 | 0.000139 |
| Rasl11a      | 810  | 10    | 110.5  | 0.441768 | 4.567399 | 3.370011 | Up | 1.61E-06 | 3.40E-06 |
| Dusp10       | 2704 | 930   | 10325  | 12.31622 | 127.3333 | 3.369978 | Up | 0        | 0        |
| Rel          | 2087 | 157   | 1731.5 | 2.686666 | 27.65549 | 3.363677 | Up | 0        | 0        |
| LOC685248    | 825  | 2     | 22     | 0.086052 | 0.88486  | 3.362166 | Up | 0.000135 | 0.000247 |
| Ankrd33b     | 1791 | 5     | 55.5   | 0.100218 | 1.030328 | 3.361897 | Up | 2.76E-05 | 5.41E-05 |
| Shpk         | 2794 | 40    | 439    | 0.511466 | 5.250326 | 3.359697 | Up | 1.16E-13 | 4.43E-13 |
| Anxa9        | 1575 | 1     | 11     | 0.022355 | 0.229178 | 3.357769 | Up | 0.003992 | 0.006451 |
| Map3k8       | 2720 | 50    | 548.5  | 0.657358 | 6.733756 | 3.356659 | Up | 3.62E-14 | 1.46E-13 |
| Ccdc64b      | 1966 | 4     | 43     | 0.072221 | 0.739386 | 3.355842 | Up | 4.59E-05 | 8.80E-05 |
| Il1a         | 1992 | 177.5 | 1947   | 3.192114 | 32.64072 | 3.354089 | Up | 0        | 0        |
| Dynlr2       | 533  | 1     | 11     | 0.068211 | 0.697477 | 3.354061 | Up | 0.003992 | 0.006459 |
| Ly6g5c       | 686  | 1     | 11     | 0.052162 | 0.532733 | 3.352338 | Up | 0.003992 | 0.006453 |
| Adcy5        | 4847 | 3     | 33     | 0.022266 | 0.227123 | 3.350561 | Up | 7.37E-05 | 0.000139 |
| Chrb1        | 2283 | 19    | 208.5  | 0.298555 | 3.043408 | 3.349618 | Up | 6.02E-09 | 1.41E-08 |
| Coq10b       | 1651 | 872.5 | 9484   | 18.83369 | 191.6617 | 3.347174 | Up | 4.97E-13 | 1.67E-12 |
| LOC100912991 | 663  | 92.5  | 1009   | 4.998004 | 50.79546 | 3.345276 | Up | 6.66E-15 | 2.78E-14 |
| Kcp          | 4769 | 2     | 22     | 0.015247 | 0.154772 | 3.343544 | Up | 0.000135 | 0.000247 |
| Ficn         | 2987 | 473   | 5141.5 | 5.662154 | 57.42552 | 3.342269 | Up | 5.88E-13 | 1.94E-12 |
| Kcng4        | 4083 | 645.5 | 6973   | 5.629115 | 57.05943 | 3.341485 | Up | 5.31E-13 | 1.77E-12 |
| Arid3b       | 3772 | 50    | 540.5  | 0.474327 | 4.782296 | 3.333749 | Up | 3.62E-14 | 1.46E-13 |
| RGD1565456   | 381  | 2     | 22     | 0.190849 | 1.923123 | 3.33295  | Up | 0.000135 | 0.000247 |
| Bfsp1        | 2132 | 15    | 161.5  | 0.252027 | 2.537721 | 3.331882 | Up | 7.51E-08 | 1.68E-07 |
| Lrrc25       | 3748 | 38.5  | 414    | 0.366423 | 3.683308 | 3.32942  | Up | 1.45E-13 | 5.43E-13 |

|              |       |        |        |          |          |          |    |          |          |
|--------------|-------|--------|--------|----------|----------|----------|----|----------|----------|
| LOC100366121 | 979   | 2.5    | 27.5   | 0.092841 | 0.932775 | 3.328691 | Up | 0.000116 | 0.000214 |
| LOC100362678 | 3947  | 1050.5 | 11303  | 9.520202 | 95.57837 | 3.32762  | Up | 0        | 0        |
| LOC100912305 | 482   | 3      | 32     | 0.221528 | 2.224021 | 3.327613 | Up | 7.38E-05 | 0.000139 |
| Dnah7        | 12427 | 1      | 11     | 0.002926 | 0.029336 | 3.325844 | Up | 0.003992 | 0.006456 |
| Atp1b4       | 4174  | 1      | 11     | 0.00871  | 0.087339 | 3.325844 | Up | 0.003992 | 0.006455 |
| Dnd1         | 1517  | 13     | 141    | 0.30778  | 3.085985 | 3.325759 | Up | 2.60E-07 | 5.70E-07 |
| Loxhd1       | 7038  | 3      | 32     | 0.015171 | 0.152057 | 3.325188 | Up | 7.38E-05 | 0.000139 |
| LOC100359977 | 854   | 5      | 53.5   | 0.208832 | 2.09209  | 3.324528 | Up | 2.76E-05 | 5.40E-05 |
| LOC100912930 | 562   | 2.5    | 26.5   | 0.156627 | 1.568684 | 3.324148 | Up | 0.000117 | 0.000216 |
| Dab1         | 1668  | 1      | 11     | 0.021797 | 0.217479 | 3.318703 | Up | 0.003992 | 0.006456 |
| Rsph10b      | 2901  | 3      | 32     | 0.037202 | 0.370761 | 3.317036 | Up | 7.38E-05 | 0.000139 |
| Tmem86a      | 1754  | 17     | 182.5  | 0.34845  | 3.472545 | 3.316968 | Up | 2.14E-08 | 4.90E-08 |
| Mb           | 1015  | 3      | 31.5   | 0.104068 | 1.035699 | 3.315001 | Up | 7.40E-05 | 0.000139 |
| LOC685385    | 291   | 10     | 105    | 1.2139   | 12.04679 | 3.310927 | Up | 1.61E-06 | 3.40E-06 |
| Egf          | 4801  | 11.5   | 122    | 0.085773 | 0.850467 | 3.309668 | Up | 8.84E-07 | 1.89E-06 |
| Catsperg1    | 3829  | 1.5    | 16     | 0.014093 | 0.139511 | 3.307346 | Up | 0.00072  | 0.001238 |
| RGD1566248   | 1167  | 2      | 21.5   | 0.061325 | 0.606226 | 3.305305 | Up | 0.000151 | 0.000276 |
| LOC691228    | 3312  | 134    | 1413   | 1.441692 | 14.23459 | 3.303566 | Up | 0        | 0        |
| Nid1         | 4982  | 5      | 52     | 0.035567 | 0.351007 | 3.302878 | Up | 2.76E-05 | 5.40E-05 |
| Trim55       | 2709  | 15     | 157    | 0.196442 | 1.938586 | 3.302831 | Up | 7.51E-08 | 1.68E-07 |
| Gsg1         | 1374  | 8.5    | 90     | 0.221992 | 2.188219 | 3.301175 | Up | 5.24E-06 | 1.07E-05 |
| Gltpd2       | 1375  | 274.5  | 2896.5 | 7.127578 | 70.24083 | 3.300826 | Up | 1.86E-13 | 6.82E-13 |
| Scel         | 2886  | 7      | 74     | 0.086594 | 0.852953 | 3.300134 | Up | 9.28E-06 | 1.87E-05 |
| Nrxn3        | 6007  | 7      | 75     | 0.041794 | 0.411305 | 3.298844 | Up | 9.28E-06 | 1.86E-05 |
| Cyp1a1       | 2615  | 28.5   | 299    | 0.388564 | 3.81746  | 3.296389 | Up | 1.93E-11 | 4.98E-11 |

|              |       |       |        |          |          |          |    |          |          |
|--------------|-------|-------|--------|----------|----------|----------|----|----------|----------|
| LOC100362255 | 19203 | 17    | 178.5  | 0.031529 | 0.309431 | 3.294873 | Up | 2.14E-08 | 4.90E-08 |
| Cpxm1        | 2367  | 7     | 74.5   | 0.107034 | 1.050261 | 3.294605 | Up | 9.28E-06 | 1.87E-05 |
| Nptx1        | 4949  | 3     | 31     | 0.021344 | 0.209131 | 3.292535 | Up | 7.40E-05 | 0.000139 |
| LOC691170    | 4221  | 471.5 | 4944   | 3.995003 | 39.10104 | 3.290939 | Up | 2.91E-13 | 1.03E-12 |
| Hps5         | 4641  | 486   | 5082.5 | 3.740629 | 36.55719 | 3.288802 | Up | 1.59E-13 | 5.89E-13 |
| Cybrd1       | 3427  | 98.5  | 1030.5 | 1.027908 | 10.03982 | 3.28795  | Up | 0        | 0        |
| LOC100909701 | 822   | 4     | 41.5   | 0.172732 | 1.686135 | 3.287109 | Up | 4.59E-05 | 8.80E-05 |
| Dyx1c1       | 2012  | 13    | 136    | 0.231489 | 2.258552 | 3.286384 | Up | 2.60E-07 | 5.69E-07 |
| Dntt         | 1851  | 5.5   | 58     | 0.10679  | 1.04178  | 3.286205 | Up | 2.76E-05 | 5.41E-05 |
| RGD1308160   | 2592  | 1.5   | 15.5   | 0.020597 | 0.200519 | 3.283215 | Up | 0.000849 | 0.001453 |
| Igflr1       | 1219  | 7     | 73     | 0.205012 | 1.994206 | 3.282037 | Up | 9.28E-06 | 1.87E-05 |
| Gstt2        | 1381  | 427   | 4438   | 11.02958 | 107.173  | 3.280493 | Up | 1.02E-12 | 3.21E-12 |
| LOC688286    | 1176  | 3     | 31     | 0.090796 | 0.877799 | 3.273187 | Up | 7.40E-05 | 0.000139 |
| Ttc18        | 3604  | 21    | 218    | 0.208981 | 2.019513 | 3.272562 | Up | 1.68E-09 | 4.01E-09 |
| LOC100910685 | 393   | 227.5 | 2346.5 | 20.63615 | 199.3748 | 3.272238 | Up | 3.55E-15 | 1.49E-14 |
| Rapgef4      | 4189  | 51    | 530    | 0.436884 | 4.220508 | 3.272096 | Up | 8.44E-15 | 3.52E-14 |
| LOC687813    | 2050  | 189   | 1956   | 3.297641 | 31.82517 | 3.270662 | Up | 2.87E-13 | 1.02E-12 |
| LOC684792    | 737   | 3     | 31     | 0.146436 | 1.412878 | 3.270298 | Up | 7.40E-05 | 0.000139 |
| Gdap1l1      | 1219  | 10    | 102.5  | 0.290723 | 2.795896 | 3.265592 | Up | 1.61E-06 | 3.40E-06 |
| Ankrd13d     | 2123  | 3     | 31     | 0.050835 | 0.488785 | 3.265301 | Up | 7.40E-05 | 0.000139 |
| Fbxo48       | 1016  | 28    | 287.5  | 0.980508 | 9.422301 | 3.264478 | Up | 1.93E-11 | 4.98E-11 |
| Rsph9        | 890   | 2     | 21     | 0.0817   | 0.784745 | 3.263809 | Up | 0.000151 | 0.000276 |
| Kpna5        | 1664  | 144   | 1479.5 | 3.092491 | 29.67388 | 3.262352 | Up | 1.05E-13 | 4.06E-13 |
| Baalc        | 2369  | 4     | 41     | 0.060419 | 0.579721 | 3.262282 | Up | 4.59E-05 | 8.80E-05 |
| RGD1563049   | 486   | 14    | 144    | 1.033153 | 9.892389 | 3.259266 | Up | 1.40E-07 | 3.10E-07 |

|              |      |        |         |          |          |          |    |          |          |
|--------------|------|--------|---------|----------|----------|----------|----|----------|----------|
| LOC67979     | 1585 | 3      | 31      | 0.06809  | 0.651288 | 3.257774 | Up | 7.40E-05 | 0.000139 |
| Tmprss11b    | 1263 | 21     | 214     | 0.595425 | 5.682644 | 3.254571 | Up | 1.68E-09 | 4.01E-09 |
| Actn3        | 2904 | 2      | 21      | 0.025039 | 0.238954 | 3.254483 | Up | 0.000151 | 0.000276 |
| LOC363337    | 1654 | 22     | 223     | 0.474569 | 4.522588 | 3.252458 | Up | 8.87E-10 | 2.13E-09 |
| Zfp563       | 6581 | 67     | 678.5   | 0.361427 | 3.437456 | 3.249564 | Up | 0        | 0        |
| Cxcl10       | 1133 | 915.5  | 9321    | 28.88792 | 274.5731 | 3.248652 | Up | 0        | 0        |
| Dlg2         | 3002 | 11     | 112     | 0.130927 | 1.243812 | 3.247936 | Up | 8.84E-07 | 1.88E-06 |
| LOC690130    | 1971 | 36     | 367.5   | 0.655321 | 6.221209 | 3.246922 | Up | 2.57E-13 | 9.17E-13 |
| Hnf1b        | 2328 | 5      | 51      | 0.0771   | 0.731799 | 3.246638 | Up | 2.76E-05 | 5.41E-05 |
| Pou5f2       | 1234 | 15     | 152.5   | 0.434037 | 4.116887 | 3.245664 | Up | 7.51E-08 | 1.68E-07 |
| Plcx2        | 7364 | 249    | 2522    | 1.205505 | 11.43177 | 3.245339 | Up | 1.13E-14 | 4.70E-14 |
| LOC100362347 | 6454 | 1218.5 | 12337.5 | 6.728291 | 63.77213 | 3.244614 | Up | 4.65E-12 | 1.29E-11 |
| LOC100912205 | 1635 | 76     | 764     | 1.650692 | 15.6191  | 3.242168 | Up | 0        | 0        |
| Zcwpw2       | 1371 | 14     | 142.5   | 0.367074 | 3.470511 | 3.241004 | Up | 1.40E-07 | 3.10E-07 |
| Bcl6         | 3389 | 412    | 4183.5  | 4.358959 | 41.1938  | 3.240372 | Up | 2.14E-13 | 7.77E-13 |
| Chd5         | 6628 | 5      | 51      | 0.027254 | 0.257035 | 3.237449 | Up | 2.76E-05 | 5.40E-05 |
| Zfp654       | 4999 | 511.5  | 5135.5  | 3.63939  | 34.30701 | 3.236735 | Up | 0        | 0        |
| Pcf11        | 6053 | 1321.5 | 13323   | 7.791644 | 73.4274  | 3.236319 | Up | 2.69E-12 | 7.87E-12 |
| Rab25        | 1082 | 3      | 30      | 0.099744 | 0.939006 | 3.234831 | Up | 7.43E-05 | 0.00014  |
| LOC100910013 | 1108 | 1.5    | 15.5    | 0.049219 | 0.462586 | 3.232425 | Up | 0.000849 | 0.001452 |
| Psd2         | 4397 | 2      | 20.5    | 0.016537 | 0.155351 | 3.231762 | Up | 0.000181 | 0.00033  |
| Cct6b        | 1803 | 4      | 40      | 0.07875  | 0.738698 | 3.229635 | Up | 4.59E-05 | 8.80E-05 |
| Cox11        | 2506 | 225.5  | 2261.5  | 3.210424 | 30.10121 | 3.228986 | Up | 0        | 0        |
| Ccnt2        | 5652 | 789.5  | 7905.5  | 4.979462 | 46.68607 | 3.228931 | Up | 0        | 0        |
| Sytl3        | 2227 | 10     | 100     | 0.160679 | 1.506458 | 3.228906 | Up | 1.61E-06 | 3.40E-06 |

|              |      |        |         |          |          |          |    |          |          |
|--------------|------|--------|---------|----------|----------|----------|----|----------|----------|
| Cldn20       | 660  | 2      | 20      | 0.108434 | 1.015813 | 3.227745 | Up | 0.000181 | 0.00033  |
| LOC688019    | 867  | 75     | 750.5   | 3.086176 | 28.89176 | 3.226766 | Up | 0        | 0        |
| LOC100911406 | 1248 | 6      | 60.5    | 0.172954 | 1.618151 | 3.225888 | Up | 1.62E-05 | 3.21E-05 |
| LOC100910867 | 3241 | 96     | 959.5   | 1.056378 | 9.872939 | 3.224353 | Up | 0        | 0        |
| LOC100912277 | 2695 | 53.5   | 533.5   | 0.704502 | 6.583678 | 3.224218 | Up | 4.04E-14 | 1.62E-13 |
| Akap14       | 1879 | 2      | 20      | 0.037477 | 0.34962  | 3.221704 | Up | 0.000181 | 0.00033  |
| Smox         | 2282 | 84     | 835     | 1.311143 | 12.23067 | 3.221606 | Up | 0        | 0        |
| Atf3         | 1928 | 177.5  | 1771    | 3.287964 | 30.6508  | 3.220658 | Up | 0        | 0        |
| Csf3         | 1305 | 175.5  | 1755    | 4.812448 | 44.83881 | 3.219905 | Up | 3.75E-13 | 1.30E-12 |
| LOC689291    | 952  | 3      | 30.5    | 0.114569 | 1.066332 | 3.218363 | Up | 7.43E-05 | 0.00014  |
| Acrbp        | 1284 | 21     | 209.5   | 0.5839   | 5.430986 | 3.217421 | Up | 1.68E-09 | 4.01E-09 |
| LOC500354    | 1494 | 55.5   | 550.5   | 1.324499 | 12.31874 | 3.217336 | Up | 0        | 0        |
| Zbtb26       | 2219 | 84.5   | 841.5   | 1.359403 | 12.63414 | 3.216282 | Up | 0        | 0        |
| Dner         | 3619 | 12.5   | 124     | 0.123199 | 1.144947 | 3.21622  | Up | 4.81E-07 | 1.04E-06 |
| RGD1562839   | 483  | 4      | 40.5    | 0.293967 | 2.7315   | 3.215967 | Up | 4.59E-05 | 8.80E-05 |
| Lhx9         | 1298 | 6.5    | 65      | 0.179413 | 1.667059 | 3.215951 | Up | 1.62E-05 | 3.20E-05 |
| Lrrc23       | 1548 | 7.5    | 73.5    | 0.171331 | 1.589006 | 3.213266 | Up | 9.28E-06 | 1.87E-05 |
| LOC100359562 | 2163 | 3      | 30.5    | 0.050425 | 0.46766  | 3.213238 | Up | 7.43E-05 | 0.00014  |
| LOC100910758 | 739  | 11     | 108     | 0.527201 | 4.889007 | 3.213116 | Up | 8.84E-07 | 1.89E-06 |
| Ctbs         | 1616 | 10.5   | 103     | 0.230906 | 2.135236 | 3.209021 | Up | 1.61E-06 | 3.40E-06 |
| Cacna2d3     | 3276 | 24     | 239     | 0.263724 | 2.437377 | 3.208231 | Up | 2.47E-10 | 6.04E-10 |
| LOC100912128 | 1370 | 9      | 89      | 0.234654 | 2.166953 | 3.207063 | Up | 2.92E-06 | 6.06E-06 |
| Ier5         | 2114 | 2426.5 | 23985.5 | 41.06811 | 377.9811 | 3.202224 | Up | 0        | 0        |
| Mos          | 1299 | 2.5    | 24      | 0.067763 | 0.622389 | 3.199242 | Up | 0.000121 | 0.000223 |
| LOC100911303 | 1182 | 2      | 20      | 0.061517 | 0.564921 | 3.198986 | Up | 0.000181 | 0.00033  |

|              |       |       |         |          |          |          |    |          |          |
|--------------|-------|-------|---------|----------|----------|----------|----|----------|----------|
| Enpp2        | 3147  | 8     | 78      | 0.090236 | 0.828081 | 3.198    | Up | 5.24E-06 | 1.07E-05 |
| LOC691422    | 2721  | 152   | 1490    | 1.992805 | 18.26419 | 3.196145 | Up | 1.08E-13 | 4.15E-13 |
| Cfhr1        | 1166  | 2     | 20      | 0.062361 | 0.571129 | 3.195092 | Up | 0.000181 | 0.00033  |
| Klh35        | 1965  | 8     | 78.5    | 0.145099 | 1.328048 | 3.194201 | Up | 5.24E-06 | 1.07E-05 |
| Cfb          | 2573  | 4     | 39.5    | 0.056075 | 0.51307  | 3.193738 | Up | 4.59E-05 | 8.80E-05 |
| LOC691519    | 3192  | 6     | 58      | 0.066543 | 0.608344 | 3.192527 | Up | 1.62E-05 | 3.21E-05 |
| LOC100911332 | 1803  | 5     | 49      | 0.098914 | 0.903857 | 3.191841 | Up | 2.76E-05 | 5.39E-05 |
| Rapsn        | 1430  | 29    | 284.5   | 0.726075 | 6.62755  | 3.190285 | Up | 1.04E-11 | 2.73E-11 |
| Slc4a1       | 4508  | 3.5   | 33.5    | 0.027337 | 0.248205 | 3.182616 | Up | 7.37E-05 | 0.000139 |
| Ccdc151      | 2201  | 11    | 108     | 0.180138 | 1.634973 | 3.182096 | Up | 8.84E-07 | 1.89E-06 |
| Cd247        | 1660  | 24    | 232.5   | 0.514239 | 4.667219 | 3.182052 | Up | 2.47E-10 | 6.04E-10 |
| Irf1         | 2078  | 1403  | 13620   | 24.15115 | 218.6488 | 3.178451 | Up | 1.34E-12 | 4.13E-12 |
| Vwf          | 8822  | 4     | 39      | 0.016485 | 0.149126 | 3.177342 | Up | 4.59E-05 | 8.80E-05 |
| Tceanc       | 1077  | 30.5  | 294     | 1.005107 | 9.090549 | 3.177018 | Up | 5.60E-12 | 1.52E-11 |
| RGD1565014   | 2644  | 5     | 48      | 0.067018 | 0.605434 | 3.175346 | Up | 2.76E-05 | 5.39E-05 |
| LOC100360914 | 3911  | 369   | 3566.5  | 3.373629 | 30.45595 | 3.174351 | Up | 0        | 0        |
| Best1        | 2035  | 2     | 19.5    | 0.035168 | 0.316606 | 3.17036  | Up | 0.000237 | 0.000428 |
| Cldn15       | 684   | 11    | 105.5   | 0.572946 | 5.155495 | 3.169639 | Up | 8.84E-07 | 1.89E-06 |
| Rsrc2        | 2095  | 2614  | 25193.5 | 44.58222 | 401.1423 | 3.169574 | Up | 0        | 0        |
| Pkib         | 1520  | 2     | 19      | 0.046329 | 0.416743 | 3.169181 | Up | 0.000237 | 0.000427 |
| Spire2       | 2304  | 1.5   | 14.5    | 0.023421 | 0.209921 | 3.163985 | Up | 0.001094 | 0.001849 |
| Mir3085      | 89    | 5.5   | 52      | 2.188773 | 19.60803 | 3.163251 | Up | 2.76E-05 | 5.40E-05 |
| Lrp2         | 15438 | 7.5   | 71      | 0.017328 | 0.154772 | 3.15894  | Up | 9.28E-06 | 1.87E-05 |
| Matk         | 1670  | 3     | 29      | 0.064625 | 0.577076 | 3.158606 | Up | 7.50E-05 | 0.000141 |
| Zbtb24       | 3769  | 442.5 | 4228    | 4.191779 | 37.41622 | 3.158029 | Up | 0        | 0        |

|              |       |        |        |          |          |          |    |          |          |
|--------------|-------|--------|--------|----------|----------|----------|----|----------|----------|
| Tmem25       | 2539  | 23.5   | 223.5  | 0.330857 | 2.949745 | 3.156311 | Up | 4.68E-10 | 1.14E-09 |
| Aen          | 2402  | 1493.5 | 14263  | 22.23152 | 198.0314 | 3.155051 | Up | 5.68E-12 | 1.54E-11 |
| Phex         | 4245  | 28     | 266    | 0.234405 | 2.087842 | 3.154938 | Up | 1.93E-11 | 4.97E-11 |
| Cep95        | 3016  | 272.5  | 2598.5 | 3.232972 | 28.77781 | 3.154024 | Up | 7.17E-13 | 2.31E-12 |
| Rwdd3        | 1044  | 37.5   | 355.5  | 1.277902 | 11.37353 | 3.15383  | Up | 1.86E-13 | 6.81E-13 |
| RGD1561560   | 1575  | 6      | 57.5   | 0.136681 | 1.216312 | 3.153627 | Up | 1.62E-05 | 3.20E-05 |
| LOC100361645 | 1755  | 225    | 2131   | 4.555573 | 40.51823 | 3.152867 | Up | 0        | 0        |
| Unc13d       | 4018  | 42     | 399.5  | 0.373184 | 3.318786 | 3.152695 | Up | 1.10E-13 | 4.23E-13 |
| Sncap        | 3803  | 42     | 401    | 0.396695 | 3.514728 | 3.147312 | Up | 1.10E-13 | 4.23E-13 |
| Sstr1        | 3615  | 1.5    | 14.5   | 0.015086 | 0.133543 | 3.146048 | Up | 0.001094 | 0.001849 |
| LOC100911486 | 4891  | 5      | 47.5   | 0.036698 | 0.324703 | 3.145351 | Up | 2.76E-05 | 5.39E-05 |
| RGD1304731   | 3430  | 17     | 160.5  | 0.175847 | 1.55584  | 3.145304 | Up | 2.14E-08 | 4.90E-08 |
| Asah2        | 2456  | 23     | 219    | 0.335804 | 2.967553 | 3.143583 | Up | 4.68E-10 | 1.13E-09 |
| Tslp         | 591   | 28     | 263    | 1.683671 | 14.87112 | 3.142832 | Up | 1.93E-11 | 4.98E-11 |
| Nrsn2        | 1402  | 2      | 19     | 0.051455 | 0.453744 | 3.140496 | Up | 0.000237 | 0.000428 |
| St7l         | 2538  | 351.5  | 3312.5 | 4.941673 | 43.55905 | 3.139901 | Up | 9.48E-14 | 3.68E-13 |
| LOC685294    | 2855  | 55.5   | 523.5  | 0.694305 | 6.119841 | 3.139852 | Up | 0        | 0        |
| Dchs1        | 10462 | 2      | 19     | 0.00695  | 0.061236 | 3.139244 | Up | 0.000237 | 0.000427 |
| Socs2        | 918   | 4      | 37     | 0.15342  | 1.350558 | 3.138001 | Up | 4.60E-05 | 8.81E-05 |
| LOC682419    | 2598  | 5      | 47     | 0.068646 | 0.602956 | 3.134802 | Up | 2.76E-05 | 5.39E-05 |
| Alpl2        | 1410  | 2      | 18.5   | 0.049943 | 0.438373 | 3.133806 | Up | 0.000337 | 0.000602 |
| Parp16       | 2336  | 2      | 19     | 0.030636 | 0.268857 | 3.133522 | Up | 0.000237 | 0.000428 |
| Alkbh1       | 2931  | 552    | 5177   | 6.714268 | 58.91833 | 3.133415 | Up | 0        | 0        |
| Tas1r3       | 2577  | 15.5   | 145.5  | 0.215561 | 1.881036 | 3.125361 | Up | 7.51E-08 | 1.68E-07 |
| Ccdc146      | 3391  | 3      | 28     | 0.031488 | 0.274618 | 3.124547 | Up | 7.61E-05 | 0.000143 |

|              |      |        |        |          |          |          |    |          |          |
|--------------|------|--------|--------|----------|----------|----------|----|----------|----------|
| Mme          | 3493 | 17     | 160.5  | 0.17563  | 1.530871 | 3.123741 | Up | 2.14E-08 | 4.89E-08 |
| LOC100912031 | 772  | 60     | 558    | 2.764739 | 24.07246 | 3.122168 | Up | 0        | 0        |
| Ppp1r3c      | 2783 | 19     | 175    | 0.242031 | 2.103626 | 3.119612 | Up | 6.02E-09 | 1.41E-08 |
| Nfkbib       | 1491 | 546    | 5103   | 13.15372 | 114.1015 | 3.116776 | Up | 1.34E-13 | 5.05E-13 |
| Hs3st5       | 3043 | 179.5  | 1669   | 2.110493 | 18.29871 | 3.11609  | Up | 0        | 0        |
| Cd72         | 1495 | 2      | 19     | 0.048638 | 0.421304 | 3.114715 | Up | 0.000237 | 0.000428 |
| Card9        | 1879 | 6      | 56     | 0.114873 | 0.993114 | 3.11192  | Up | 1.62E-05 | 3.20E-05 |
| Vstm5        | 1894 | 15.5   | 144    | 0.294506 | 2.545988 | 3.111858 | Up | 7.51E-08 | 1.69E-07 |
| Ccdc15       | 2601 | 113    | 1045.5 | 1.555699 | 13.43766 | 3.110648 | Up | 2.08E-13 | 7.57E-13 |
| Fmo3         | 1916 | 14.5   | 134    | 0.270952 | 2.337804 | 3.109046 | Up | 1.40E-07 | 3.11E-07 |
| Abhd10       | 1251 | 355    | 3280   | 10.13781 | 87.46358 | 3.108936 | Up | 5.33E-13 | 1.78E-12 |
| Ccr1         | 1870 | 7.5    | 69.5   | 0.143669 | 1.237237 | 3.106302 | Up | 9.28E-06 | 1.87E-05 |
| LOC100909675 | 1387 | 817    | 7521.5 | 21.03066 | 180.9438 | 3.104975 | Up | 1.28E-12 | 3.95E-12 |
| LOC498122    | 1425 | 11     | 101    | 0.274209 | 2.358784 | 3.104694 | Up | 8.84E-07 | 1.89E-06 |
| LOC100909946 | 706  | 17     | 156    | 0.85595  | 7.361958 | 3.104491 | Up | 2.14E-08 | 4.89E-08 |
| Lyl1         | 1484 | 5      | 46     | 0.12095  | 1.039753 | 3.10376  | Up | 2.76E-05 | 5.39E-05 |
| LOC100911932 | 2519 | 7      | 64.5   | 0.09921  | 0.85256  | 3.103249 | Up | 9.28E-06 | 1.87E-05 |
| Enpp3        | 2799 | 23.5   | 216    | 0.298894 | 2.568435 | 3.103182 | Up | 4.68E-10 | 1.13E-09 |
| Oasl         | 1980 | 13.5   | 124    | 0.243253 | 2.088164 | 3.101708 | Up | 2.60E-07 | 5.70E-07 |
| RGD1311659   | 1839 | 336.5  | 3090.5 | 6.531241 | 56.05649 | 3.101452 | Up | 2.61E-13 | 9.32E-13 |
| Zfp105       | 2025 | 231.5  | 2128   | 4.0895   | 35.07967 | 3.100639 | Up | 0        | 0        |
| LOC100909483 | 3372 | 25.5   | 233    | 0.269497 | 2.309113 | 3.098995 | Up | 1.30E-10 | 3.22E-10 |
| Zfp473       | 2932 | 9      | 82.5   | 0.110035 | 0.942347 | 3.098297 | Up | 2.92E-06 | 6.07E-06 |
| Rnd3         | 2004 | 2255.5 | 20706  | 40.27328 | 344.8658 | 3.09814  | Up | 0        | 0        |
| LOC100362607 | 691  | 14     | 128    | 0.723326 | 6.184532 | 3.095946 | Up | 1.40E-07 | 3.11E-07 |



|              |      |       |        |          |          |          |    |          |          |
|--------------|------|-------|--------|----------|----------|----------|----|----------|----------|
| Il1r2        | 1380 | 23    | 210.5  | 0.596387 | 5.098894 | 3.095863 | Up | 4.68E-10 | 1.14E-09 |
| Efcab2       | 2604 | 188.5 | 1717   | 2.58094  | 21.99733 | 3.09136  | Up | 1.80E-13 | 6.62E-13 |
| Ccl9         | 1313 | 15.5  | 141    | 0.422204 | 3.598356 | 3.091327 | Up | 7.51E-08 | 1.68E-07 |
| Neu2         | 1693 | 1.5   | 14     | 0.032212 | 0.274492 | 3.091093 | Up | 0.001094 | 0.001849 |
| Zfp438       | 3117 | 55    | 503    | 0.632873 | 5.391776 | 3.090773 | Up | 0        | 0        |
| Cpn1         | 1780 | 2     | 18.5   | 0.040206 | 0.342194 | 3.089337 | Up | 0.000337 | 0.000602 |
| Scgb2a2      | 1118 | 8     | 73     | 0.256052 | 2.175167 | 3.086619 | Up | 5.24E-06 | 1.07E-05 |
| Pbx4         | 1384 | 17.5  | 159    | 0.451426 | 3.832372 | 3.085678 | Up | 2.14E-08 | 4.90E-08 |
| Spata25      | 1608 | 4     | 35.5   | 0.087587 | 0.743521 | 3.085593 | Up | 4.61E-05 | 8.83E-05 |
| Phf7         | 1574 | 82    | 742.5  | 1.858719 | 15.74521 | 3.082532 | Up | 0        | 0        |
| LOC100912373 | 897  | 2     | 18     | 0.078506 | 0.664953 | 3.082382 | Up | 0.000337 | 0.000602 |
| Egr2         | 2976 | 354   | 3207   | 4.257822 | 36.0116  | 3.080274 | Up | 0        | 0        |
| Rex2         | 1251 | 3.5   | 32     | 0.100342 | 0.847544 | 3.078361 | Up | 7.38E-05 | 0.000139 |
| LOC100912840 | 1449 | 14.5  | 130    | 0.354715 | 2.987912 | 3.074404 | Up | 1.40E-07 | 3.11E-07 |
| LOC686785    | 1240 | 15    | 135.5  | 0.431474 | 3.634163 | 3.074277 | Up | 7.51E-08 | 1.68E-07 |
| Zfp788       | 4947 | 78    | 699    | 0.561533 | 4.718027 | 3.070741 | Up | 0        | 0        |
| LOC684623    | 1332 | 1.5   | 13.5   | 0.040081 | 0.336691 | 3.070427 | Up | 0.001551 | 0.002595 |
| LOC100910286 | 1051 | 264   | 2371   | 8.957813 | 75.24008 | 3.070283 | Up | 6.88E-14 | 2.71E-13 |
| LOC100910931 | 1432 | 284.5 | 2545   | 7.07373  | 59.39402 | 3.069775 | Up | 1.18E-13 | 4.49E-13 |
| Wdr27        | 2759 | 20    | 179.5  | 0.258977 | 2.170998 | 3.067462 | Up | 3.18E-09 | 7.52E-09 |
| Stard13      | 5529 | 982.5 | 8829   | 6.358815 | 53.30471 | 3.067433 | Up | 0        | 0        |
| Adam30       | 3441 | 24.5  | 218.5  | 0.252694 | 2.116498 | 3.066213 | Up | 2.47E-10 | 6.04E-10 |
| Sh2d4b       | 1296 | 6     | 53.5   | 0.164336 | 1.373722 | 3.063372 | Up | 1.62E-05 | 3.20E-05 |
| Zbtb43       | 5108 | 150   | 1337.5 | 1.045748 | 8.735534 | 3.062361 | Up | 7.11E-15 | 2.97E-14 |
| Asgr1        | 1214 | 14    | 124.5  | 0.410767 | 3.421341 | 3.058169 | Up | 1.40E-07 | 3.11E-07 |

|              |       |       |        |          |          |          |    |          |          |
|--------------|-------|-------|--------|----------|----------|----------|----|----------|----------|
| Pdk4         | 1435  | 53    | 472    | 1.320412 | 10.99664 | 3.058003 | Up | 4.04E-14 | 1.62E-13 |
| Ddn          | 3582  | 8     | 71.5   | 0.079918 | 0.665049 | 3.056871 | Up | 5.24E-06 | 1.07E-05 |
| RGD1565622   | 2133  | 27    | 239.5  | 0.452683 | 3.762069 | 3.054952 | Up | 3.64E-11 | 9.17E-11 |
| Gpr3711      | 2302  | 41.5  | 371    | 0.646214 | 5.36903  | 3.054577 | Up | 1.47E-13 | 5.48E-13 |
| Slc17a2      | 2822  | 5     | 44.5   | 0.063197 | 0.524721 | 3.053616 | Up | 2.76E-05 | 5.39E-05 |
| Zfp59        | 2004  | 45.5  | 403.5  | 0.81087  | 6.730653 | 3.053204 | Up | 2.49E-14 | 1.02E-13 |
| Atg9b        | 2775  | 53    | 471.5  | 0.684461 | 5.67648  | 3.051957 | Up | 4.04E-14 | 1.62E-13 |
| LOC499746    | 1431  | 2     | 18     | 0.050813 | 0.421218 | 3.051298 | Up | 0.000337 | 0.000602 |
| Pus3         | 1718  | 297   | 2632   | 6.169353 | 51.13282 | 3.051059 | Up | 3.95E-13 | 1.35E-12 |
| LOC100912465 | 758   | 211.5 | 1856   | 9.859169 | 81.66256 | 3.050137 | Up | 2.52E-13 | 9.04E-13 |
| Alox12       | 2839  | 2     | 17.5   | 0.024804 | 0.205326 | 3.049247 | Up | 0.000518 | 0.000915 |
| LOC100910206 | 739   | 5     | 44     | 0.24133  | 1.995156 | 3.047423 | Up | 2.76E-05 | 5.39E-05 |
| LOC499136    | 702   | 74    | 653.5  | 3.755685 | 31.03209 | 3.046613 | Up | 9.99E-15 | 4.15E-14 |
| Styx11       | 1306  | 34.5  | 304    | 0.941537 | 7.769442 | 3.044721 | Up | 5.99E-13 | 1.97E-12 |
| Ccdc148      | 2340  | 2.5   | 22     | 0.038107 | 0.314278 | 3.043896 | Up | 0.000135 | 0.000247 |
| RGD1561662   | 4502  | 112   | 988    | 0.888171 | 7.320606 | 3.043053 | Up | 0        | 0        |
| Rbm12b       | 3427  | 159   | 1395   | 1.651675 | 13.60493 | 3.042128 | Up | 8.53E-14 | 3.33E-13 |
| Mesp1        | 1275  | 1.5   | 13     | 0.041423 | 0.34112  | 3.041767 | Up | 0.001551 | 0.002598 |
| Cwf19l2      | 6346  | 552.5 | 4849   | 3.099527 | 25.51239 | 3.041078 | Up | 0        | 0        |
| Giot1        | 2557  | 102   | 894    | 1.418889 | 11.67861 | 3.041035 | Up | 0        | 0        |
| Slc19a2      | 3479  | 267.5 | 2349   | 2.738925 | 22.53792 | 3.040673 | Up | 7.08E-13 | 2.29E-12 |
| Elavl2       | 4159  | 96.5  | 845.5  | 0.825235 | 6.785068 | 3.039487 | Up | 0        | 0        |
| Tifa         | 1662  | 135   | 1186.5 | 2.900715 | 23.83887 | 3.038835 | Up | 2.15E-13 | 7.77E-13 |
| Hspb3        | 741   | 1.5   | 13     | 0.071275 | 0.585734 | 3.038779 | Up | 0.001551 | 0.002597 |
| Neb          | 20076 | 30    | 264.5  | 0.053472 | 0.439398 | 3.038683 | Up | 5.60E-12 | 1.52E-11 |

|                          |       |      |        |          |          |          |    |          |          |
|--------------------------|-------|------|--------|----------|----------|----------|----|----------|----------|
| Zc3h12d                  | 3691  | 11   | 97.5   | 0.10773  | 0.883518 | 3.035846 | Up | 8.84E-07 | 1.89E-06 |
| L1td1                    | 2887  | 1.5  | 13     | 0.018294 | 0.150027 | 3.035784 | Up | 0.001551 | 0.002596 |
| Foxh1                    | 1721  | 4    | 36     | 0.084501 | 0.692112 | 3.033961 | Up | 4.60E-05 | 8.81E-05 |
| Bucs1                    | 2142  | 2.5  | 22     | 0.041898 | 0.342488 | 3.031113 | Up | 0.000135 | 0.000247 |
| Slc35f2                  | 2455  | 2    | 17.5   | 0.029151 | 0.238175 | 3.030388 | Up | 0.000518 | 0.000914 |
| Dnah17                   | 14065 | 24.5 | 213.5  | 0.06227  | 0.507212 | 3.025977 | Up | 2.47E-10 | 6.04E-10 |
| Mpp7                     | 1892  | 17   | 147    | 0.319398 | 2.601143 | 3.025719 | Up | 2.14E-08 | 4.90E-08 |
| Synpo2l                  | 3440  | 4    | 35     | 0.041942 | 0.341523 | 3.025521 | Up | 4.61E-05 | 8.83E-05 |
| Efcab3                   | 1791  | 2    | 17     | 0.039319 | 0.31992  | 3.024426 | Up | 0.000518 | 0.000914 |
| Sfrp5                    | 1989  | 32.5 | 284    | 0.586567 | 4.767599 | 3.022894 | Up | 1.74E-12 | 5.25E-12 |
| Trim10                   | 2366  | 4    | 34     | 0.059526 | 0.481298 | 3.015333 | Up | 4.63E-05 | 8.85E-05 |
| Myl4                     | 795   | 50   | 430.5  | 2.24619  | 18.11494 | 3.011628 | Up | 3.62E-14 | 1.46E-13 |
| Ptpn22                   | 2747  | 9.5  | 82.5   | 0.124063 | 1.000241 | 3.011203 | Up | 2.92E-06 | 6.07E-06 |
| RGD1560020_predicte<br>d | 3287  | 15   | 129.5  | 0.162422 | 1.306188 | 3.007543 | Up | 7.51E-08 | 1.68E-07 |
| Nrgn                     | 1384  | 10   | 85.5   | 0.255235 | 2.049871 | 3.005637 | Up | 1.61E-06 | 3.40E-06 |
| Krt34                    | 1176  | 4.5  | 38.5   | 0.137169 | 1.100291 | 3.003854 | Up | 4.60E-05 | 8.80E-05 |
| Rnf165                   | 6832  | 4.5  | 39     | 0.023779 | 0.190718 | 3.003681 | Up | 4.59E-05 | 8.80E-05 |
| Ripk4                    | 3586  | 14   | 120    | 0.138741 | 1.111717 | 3.002325 | Up | 1.40E-07 | 3.11E-07 |
| Tinag                    | 1737  | 2    | 17     | 0.040541 | 0.324166 | 2.99928  | Up | 0.000518 | 0.000914 |
| Epn3                     | 3522  | 2    | 17     | 0.02032  | 0.162429 | 2.998851 | Up | 0.000518 | 0.000914 |
| Sema4g                   | 4326  | 53   | 454    | 0.439591 | 3.505297 | 2.995302 | Up | 4.04E-14 | 1.62E-13 |
| Vsig8                    | 1812  | 1.5  | 12.5   | 0.029147 | 0.231559 | 2.989953 | Up | 0.002405 | 0.003969 |
| Mdh1b                    | 1655  | 4    | 34.5   | 0.087178 | 0.6919   | 2.988526 | Up | 4.63E-05 | 8.85E-05 |
| Zfp189                   | 2945  | 197  | 1671.5 | 2.387613 | 18.93552 | 2.987454 | Up | 0        | 0        |

|              |      |        |         |          |          |          |    |          |          |
|--------------|------|--------|---------|----------|----------|----------|----|----------|----------|
| Cstf3        | 2028 | 738.5  | 6244    | 13.00777 | 102.8318 | 2.982841 | Up | 1.08E-12 | 3.38E-12 |
| Timd2        | 1371 | 98     | 825     | 2.542334 | 20.07478 | 2.981159 | Up | 0        | 0        |
| Lrrc24       | 1930 | 23     | 194     | 0.425244 | 3.356913 | 2.980773 | Up | 4.68E-10 | 1.13E-09 |
| Klh26        | 3820 | 583.5  | 4932.5  | 5.451356 | 43.01476 | 2.980145 | Up | 5.08E-13 | 1.70E-12 |
| Aire         | 1891 | 3      | 25.5    | 0.057072 | 0.449981 | 2.979009 | Up | 8.88E-05 | 0.000166 |
| LOC680200    | 1602 | 34.5   | 291     | 0.768644 | 6.059589 | 2.978833 | Up | 5.99E-13 | 1.97E-12 |
| LOC100912972 | 744  | 3      | 25      | 0.143516 | 1.129127 | 2.975919 | Up | 8.88E-05 | 0.000166 |
| Cdkn1a       | 1894 | 4910.5 | 41456   | 92.88415 | 730.3556 | 2.975095 | Up | 3.42E-11 | 8.63E-11 |
| LOC100363993 | 4062 | 24.5   | 204.5   | 0.213921 | 1.681845 | 2.974893 | Up | 2.47E-10 | 6.04E-10 |
| RGD1566314   | 2946 | 68     | 572.5   | 0.827122 | 6.490699 | 2.972202 | Up | 0        | 0        |
| LOC100362205 | 1138 | 1.5    | 12.5    | 0.046914 | 0.367913 | 2.971275 | Up | 0.002405 | 0.003965 |
| LOC100364265 | 1899 | 579    | 4845.5  | 10.87247 | 85.18786 | 2.969969 | Up | 9.45E-13 | 3.00E-12 |
| Irs3         | 1969 | 9      | 75.5    | 0.163268 | 1.276767 | 2.967177 | Up | 2.92E-06 | 6.06E-06 |
| Rdh14        | 1865 | 158    | 1317    | 3.017358 | 23.59498 | 2.967122 | Up | 1.62E-14 | 6.66E-14 |
| Dusp8        | 2439 | 329    | 2764    | 4.850125 | 37.77771 | 2.961442 | Up | 1.13E-14 | 4.70E-14 |
| LOC498132    | 2193 | 13     | 108.5   | 0.212121 | 1.650807 | 2.96021  | Up | 2.60E-07 | 5.70E-07 |
| Zfp597       | 1610 | 46.5   | 388.5   | 1.033313 | 8.038773 | 2.959698 | Up | 7.84E-14 | 3.07E-13 |
| Rho          | 1493 | 2      | 17      | 0.048703 | 0.378349 | 2.957642 | Up | 0.000518 | 0.000915 |
| Gpr113       | 3145 | 2      | 17      | 0.02312  | 0.179611 | 2.957642 | Up | 0.000518 | 0.000914 |
| LOC679608    | 1029 | 16     | 133.5   | 0.558625 | 4.336336 | 2.956524 | Up | 4.01E-08 | 9.10E-08 |
| Sema4f       | 4008 | 8      | 67.5    | 0.072139 | 0.55992  | 2.95637  | Up | 5.24E-06 | 1.07E-05 |
| LOC100911895 | 980  | 3.5    | 29      | 0.12692  | 0.984303 | 2.955189 | Up | 7.50E-05 | 0.000141 |
| Tpd5211      | 1272 | 2.5    | 20.5    | 0.069652 | 0.539843 | 2.954292 | Up | 0.000181 | 0.00033  |
| LOC317588    | 2882 | 2434   | 20127.5 | 30.09069 | 233.182  | 2.954067 | Up | 0        | 0        |
| Maff         | 1941 | 754    | 6257.5  | 13.88823 | 107.5992 | 2.953733 | Up | 5.14E-13 | 1.72E-12 |

|              |      |        |        |          |          |          |    |          |          |
|--------------|------|--------|--------|----------|----------|----------|----|----------|----------|
| Dmrt1        | 1415 | 5      | 41.5   | 0.126848 | 0.980143 | 2.949894 | Up | 2.77E-05 | 5.39E-05 |
| Ppm1h        | 3132 | 273    | 2271.5 | 3.129839 | 24.1733  | 2.949254 | Up | 2.09E-13 | 7.61E-13 |
| LOC100911284 | 501  | 4      | 33     | 0.285694 | 2.204521 | 2.94792  | Up | 4.65E-05 | 8.90E-05 |
| LOC303140    | 2938 | 11.5   | 94     | 0.1386   | 1.068809 | 2.947006 | Up | 8.84E-07 | 1.89E-06 |
| Sh3rf2       | 2497 | 2      | 16     | 0.028202 | 0.217176 | 2.945014 | Up | 0.000844 | 0.001445 |
| Dapp1        | 3062 | 32     | 265    | 0.375458 | 2.891217 | 2.944955 | Up | 1.74E-12 | 5.25E-12 |
| LOC100362110 | 1866 | 800    | 6570.5 | 15.27108 | 117.5116 | 2.943929 | Up | 7.63E-13 | 2.45E-12 |
| Zfp12        | 4065 | 223    | 1828   | 1.95554  | 15.02155 | 2.941395 | Up | 7.02E-14 | 2.76E-13 |
| LOC100362224 | 3369 | 88.5   | 725    | 0.937349 | 7.199181 | 2.941175 | Up | 1.80E-14 | 7.37E-14 |
| LOC100363776 | 341  | 33     | 268    | 3.41749  | 26.23421 | 2.940441 | Up | 1.01E-12 | 3.19E-12 |
| Obsl1        | 5808 | 3      | 25     | 0.018582 | 0.142626 | 2.940271 | Up | 8.88E-05 | 0.000166 |
| Snx20        | 1393 | 5      | 40.5   | 0.126381 | 0.969071 | 2.938821 | Up | 2.77E-05 | 5.40E-05 |
| Slc9a4       | 3183 | 2      | 16.5   | 0.022484 | 0.172363 | 2.938484 | Up | 0.000844 | 0.001445 |
| LOC501456    | 2052 | 20     | 165    | 0.348206 | 2.668822 | 2.938192 | Up | 3.18E-09 | 7.52E-09 |
| Snai1        | 1623 | 19.5   | 161    | 0.432931 | 3.314712 | 2.936674 | Up | 6.02E-09 | 1.41E-08 |
| Mcmcdc2      | 3200 | 19     | 154    | 0.209417 | 1.602803 | 2.936149 | Up | 6.02E-09 | 1.41E-08 |
| Zfp84        | 5897 | 275.5  | 2258   | 1.671113 | 12.77945 | 2.934945 | Up | 5.96E-13 | 1.97E-12 |
| Zfp52        | 2957 | 211.5  | 1718.5 | 2.549997 | 19.38782 | 2.926583 | Up | 2.52E-13 | 9.04E-13 |
| LOC100911534 | 900  | 109    | 889    | 4.335659 | 32.94175 | 2.925594 | Up | 0        | 0        |
| Zfp385c      | 1555 | 2      | 16.5   | 0.046023 | 0.349345 | 2.924213 | Up | 0.000844 | 0.001445 |
| Mctp1-ps1    | 2879 | 8      | 64.5   | 0.098636 | 0.747516 | 2.921923 | Up | 5.24E-06 | 1.07E-05 |
| Mgmt         | 812  | 4      | 32.5   | 0.176272 | 1.334632 | 2.920566 | Up | 4.70E-05 | 8.99E-05 |
| LOC100364397 | 438  | 2      | 16     | 0.160775 | 1.2155   | 2.918432 | Up | 0.000844 | 0.001445 |
| Lztf11       | 1442 | 141    | 1132   | 3.485792 | 26.22183 | 2.91121  | Up | 0        | 0        |
| Cpeb2        | 6178 | 1032.5 | 8271   | 5.942738 | 44.67875 | 2.910389 | Up | 1.69E-12 | 5.13E-12 |

|              |      |        |         |          |          |          |    |          |          |
|--------------|------|--------|---------|----------|----------|----------|----|----------|----------|
| RGD1310862   | 7479 | 216    | 1727    | 1.028084 | 7.708734 | 2.906536 | Up | 2.34E-13 | 8.42E-13 |
| Thap1        | 1100 | 206    | 1652.5  | 6.701224 | 50.18269 | 2.904693 | Up | 2.46E-13 | 8.84E-13 |
| Helz         | 6193 | 501.5  | 4022    | 2.897164 | 21.6744  | 2.903279 | Up | 7.99E-14 | 3.13E-13 |
| Gsdma        | 2910 | 1294   | 10319.5 | 15.849   | 118.4893 | 2.902293 | Up | 2.60E-12 | 7.61E-12 |
| LOC682357    | 1162 | 39     | 311     | 1.197038 | 8.948106 | 2.902113 | Up | 1.32E-13 | 4.99E-13 |
| LOC100361114 | 3215 | 329    | 2628    | 3.646638 | 27.25264 | 2.901757 | Up | 1.13E-14 | 4.70E-14 |
| Gpbp1        | 3305 | 2329.5 | 18573   | 25.12303 | 187.5792 | 2.900417 | Up | 0        | 0        |
| Rora         | 1684 | 80.5   | 642     | 1.709689 | 12.72609 | 2.895983 | Up | 0        | 0        |
| Prodh2       | 1466 | 53.5   | 431.5   | 1.315061 | 9.784964 | 2.895437 | Up | 4.04E-14 | 1.62E-13 |
| Msi1         | 1089 | 2      | 16      | 0.065718 | 0.488879 | 2.895125 | Up | 0.000844 | 0.001445 |
| Csf1r        | 3698 | 2      | 16      | 0.019353 | 0.143967 | 2.895125 | Up | 0.000844 | 0.001446 |
| lhh          | 2272 | 2.5    | 19.5    | 0.038743 | 0.287937 | 2.893739 | Up | 0.000237 | 0.000428 |
| Errfi1       | 3007 | 1334   | 10623.5 | 15.86256 | 117.8796 | 2.893616 | Up | 1.66E-12 | 5.03E-12 |
| Mesp2        | 1857 | 34.5   | 276     | 0.666801 | 4.952967 | 2.892965 | Up | 5.99E-13 | 1.97E-12 |
| Mogat2       | 1774 | 2      | 16      | 0.040342 | 0.299599 | 2.892684 | Up | 0.000844 | 0.001446 |
| Myoz3        | 917  | 2      | 16      | 0.079295 | 0.588429 | 2.89157  | Up | 0.000844 | 0.001445 |
| Dhdh         | 1214 | 35.5   | 283     | 1.048505 | 7.775509 | 2.890603 | Up | 3.77E-13 | 1.30E-12 |
| Pcsk4        | 2458 | 3      | 24      | 0.043907 | 0.325258 | 2.889064 | Up | 0.000101 | 0.000188 |
| Scg5         | 1139 | 3      | 23.5    | 0.094249 | 0.697138 | 2.886894 | Up | 0.000123 | 0.000225 |
| Vegfb        | 1812 | 757    | 5991    | 14.91373 | 110.3051 | 2.886786 | Up | 8.99E-13 | 2.86E-12 |
| Gtf2a1l      | 1602 | 1.5    | 12      | 0.033684 | 0.248965 | 2.885812 | Up | 0.002405 | 0.003968 |
| Slco1b3      | 3218 | 2      | 16      | 0.022239 | 0.164322 | 2.885336 | Up | 0.000844 | 0.001444 |
| RGD1310212   | 3498 | 306    | 2406.5  | 3.118954 | 22.99506 | 2.88219  | Up | 0        | 0        |
| Zswim3       | 2691 | 144    | 1136.5  | 1.914822 | 14.11559 | 2.882008 | Up | 1.05E-13 | 4.06E-13 |
| Gsta5        | 1055 | 2.5    | 20      | 0.086153 | 0.634632 | 2.880942 | Up | 0.000181 | 0.00033  |

|              |      |        |         |          |          |          |    |          |          |
|--------------|------|--------|---------|----------|----------|----------|----|----------|----------|
| Cd248        | 2565 | 6      | 48      | 0.084151 | 0.61987  | 2.88092  | Up | 1.62E-05 | 3.20E-05 |
| Sycp2        | 4771 | 2      | 16      | 0.015    | 0.110457 | 2.880416 | Up | 0.000844 | 0.001445 |
| RGD1559709   | 1825 | 6      | 47.5    | 0.117644 | 0.866259 | 2.880377 | Up | 1.62E-05 | 3.20E-05 |
| Zfp292       | 9966 | 1220.5 | 9592    | 4.364435 | 32.12224 | 2.879706 | Up | 7.20E-12 | 1.92E-11 |
| Dear         | 3274 | 2      | 15.5    | 0.021509 | 0.1582   | 2.878752 | Up | 0.001428 | 0.0024   |
| Lif          | 609  | 558.5  | 4412    | 32.8673  | 241.6811 | 2.87838  | Up | 1.47E-13 | 5.48E-13 |
| Inpp5d       | 4943 | 63     | 497.5   | 0.456184 | 3.346912 | 2.875143 | Up | 0        | 0        |
| RGD1561413   | 1567 | 81.5   | 639.5   | 1.862374 | 13.65374 | 2.874082 | Up | 5.82E-14 | 2.30E-13 |
| Atp1a2       | 5149 | 6.5    | 52      | 0.045896 | 0.336476 | 2.874064 | Up | 1.62E-05 | 3.20E-05 |
| RGD1565775   | 3011 | 1307.5 | 10231.5 | 15.47961 | 113.3345 | 2.872146 | Up | 2.67E-12 | 7.82E-12 |
| LOC100910319 | 805  | 43.5   | 339     | 1.924011 | 14.06873 | 2.870303 | Up | 1.18E-13 | 4.49E-13 |
| Klf6         | 4206 | 5867   | 45815   | 49.78658 | 363.7381 | 2.869071 | Up | 1.83E-11 | 4.72E-11 |
| LOC365990    | 702  | 2      | 15.5    | 0.100313 | 0.732686 | 2.868689 | Up | 0.001428 | 0.002399 |
| Cml1         | 2180 | 3      | 24      | 0.050032 | 0.365084 | 2.867302 | Up | 0.000101 | 0.000188 |
| RatNP-3b     | 537  | 3.5    | 27      | 0.230554 | 1.682019 | 2.867014 | Up | 7.82E-05 | 0.000147 |
| Slc4a11      | 3039 | 56     | 436.5   | 0.657872 | 4.795292 | 2.86574  | Up | 1.58E-14 | 6.49E-14 |
| Cnot4        | 3502 | 1042   | 8150    | 10.66413 | 77.68067 | 2.86479  | Up | 1.99E-12 | 5.95E-12 |
| Cyp11a1      | 1581 | 56     | 436     | 1.264563 | 9.207812 | 2.86422  | Up | 1.58E-14 | 6.49E-14 |
| Mylk         | 7764 | 17     | 133     | 0.077834 | 0.566711 | 2.864146 | Up | 2.14E-08 | 4.89E-08 |
| LOC100910826 | 615  | 3      | 23      | 0.171755 | 1.250076 | 2.863591 | Up | 0.000123 | 0.000225 |
| Ovol3        | 573  | 2      | 16      | 0.126899 | 0.922843 | 2.8624   | Up | 0.000844 | 0.001445 |
| Kctd11       | 2164 | 238    | 1850.5  | 3.929664 | 28.54942 | 2.860983 | Up | 6.71E-13 | 2.19E-12 |
| Rasgrp3      | 4293 | 148.5  | 1152.5  | 1.233844 | 8.960412 | 2.860405 | Up | 0        | 0        |
| Sfn          | 1284 | 13     | 101     | 0.362738 | 2.631128 | 2.858682 | Up | 2.60E-07 | 5.69E-07 |
| Fgf20        | 639  | 2.5    | 19.5    | 0.140446 | 1.018142 | 2.857855 | Up | 0.000237 | 0.000428 |

|              |      |        |        |          |          |          |    |          |          |
|--------------|------|--------|--------|----------|----------|----------|----|----------|----------|
| Syt13        | 1281 | 18.5   | 144.5  | 0.521476 | 3.773493 | 2.855228 | Up | 1.14E-08 | 2.63E-08 |
| Scn10a       | 6524 | 3      | 23     | 0.016367 | 0.118393 | 2.854751 | Up | 0.000123 | 0.000225 |
| Grm4         | 4488 | 209    | 1624.5 | 1.673659 | 12.07755 | 2.85125  | Up | 1.08E-13 | 4.16E-13 |
| RGD1562449   | 1679 | 2      | 16     | 0.043308 | 0.312262 | 2.850069 | Up | 0.000844 | 0.001446 |
| Icam1        | 2602 | 1213.5 | 9387.5 | 16.71419 | 120.4563 | 2.849364 | Up | 5.51E-12 | 1.50E-11 |
| Ovol1        | 2993 | 3.5    | 27     | 0.041557 | 0.299079 | 2.847351 | Up | 7.82E-05 | 0.000147 |
| Zfp112       | 3446 | 19.5   | 151    | 0.20307  | 1.460623 | 2.846533 | Up | 6.02E-09 | 1.41E-08 |
| Cyp2c6v1     | 1681 | 16.5   | 126.5  | 0.349357 | 2.51272  | 2.846475 | Up | 4.01E-08 | 9.10E-08 |
| Akr1c14      | 2334 | 16     | 123.5  | 0.245792 | 1.76719  | 2.845947 | Up | 4.01E-08 | 9.10E-08 |
| Tbx4         | 3254 | 2.5    | 19.5   | 0.02758  | 0.198277 | 2.84583  | Up | 0.000237 | 0.000428 |
| Yjfn3        | 785  | 1.5    | 11.5   | 0.068741 | 0.493119 | 2.842696 | Up | 0.003992 | 0.006452 |
| Prss8        | 2208 | 5.5    | 42     | 0.088225 | 0.632629 | 2.842102 | Up | 2.76E-05 | 5.39E-05 |
| Dhrs7        | 1753 | 5      | 39     | 0.103044 | 0.738155 | 2.84066  | Up | 2.77E-05 | 5.40E-05 |
| Taf1d        | 1299 | 1083   | 8288   | 29.75765 | 212.9165 | 2.838955 | Up | 4.28E-12 | 1.20E-11 |
| Slc13a5      | 3254 | 15     | 113.5  | 0.163188 | 1.167165 | 2.8384   | Up | 7.51E-08 | 1.68E-07 |
| Gpr19        | 1544 | 315    | 2409.5 | 7.289937 | 52.0755  | 2.836627 | Up | 4.99E-13 | 1.67E-12 |
| RGD1565212   | 1081 | 3      | 22.5   | 0.097715 | 0.697829 | 2.836229 | Up | 0.000162 | 0.000294 |
| Bmp5         | 3708 | 2      | 15     | 0.018991 | 0.135545 | 2.835368 | Up | 0.001428 | 0.0024   |
| Abcb1a       | 4927 | 706    | 5398   | 5.125126 | 36.57461 | 2.835183 | Up | 3.70E-13 | 1.28E-12 |
| Katnal2      | 1569 | 10     | 76     | 0.225871 | 1.611471 | 2.834806 | Up | 1.61E-06 | 3.40E-06 |
| Ccdc117      | 2224 | 194    | 1482.5 | 3.117254 | 22.23251 | 2.834323 | Up | 5.28E-13 | 1.76E-12 |
| LOC498029    | 1362 | 71     | 542    | 1.862405 | 13.28212 | 2.834247 | Up | 0        | 0        |
| Fbxo15       | 1693 | 19     | 144    | 0.39989  | 2.850916 | 2.83375  | Up | 6.02E-09 | 1.41E-08 |
| Fscn3        | 1795 | 23     | 176    | 0.456907 | 3.256534 | 2.833366 | Up | 4.68E-10 | 1.14E-09 |
| LOC100361431 | 744  | 3      | 22.5   | 0.141975 | 1.009077 | 2.829327 | Up | 0.000162 | 0.000294 |



|              |      |       |        |          |          |          |    |          |          |
|--------------|------|-------|--------|----------|----------|----------|----|----------|----------|
| Cyp2s1       | 2632 | 7     | 53.5   | 0.095386 | 0.676423 | 2.826075 | Up | 9.28E-06 | 1.86E-05 |
| Cacna1s      | 6125 | 8     | 61     | 0.046737 | 0.331183 | 2.824982 | Up | 5.24E-06 | 1.07E-05 |
| Ppil6        | 942  | 13    | 98     | 0.49078  | 3.477184 | 2.824771 | Up | 2.60E-07 | 5.70E-07 |
| LOC499742    | 906  | 61.5  | 463.5  | 2.410323 | 17.06891 | 2.824073 | Up | 3.49E-14 | 1.41E-13 |
| LOC100911163 | 729  | 2     | 15.5   | 0.099744 | 0.705549 | 2.822446 | Up | 0.001428 | 0.002399 |
| Krcc1        | 1650 | 830.5 | 6267.5 | 17.92523 | 126.7819 | 2.822286 | Up | 0        | 0        |
| Slc35b3      | 1925 | 217   | 1632.5 | 4.001574 | 28.2878  | 2.82154  | Up | 2.24E-13 | 8.07E-13 |
| Epha10       | 3782 | 2     | 15     | 0.018771 | 0.132655 | 2.821082 | Up | 0.001428 | 0.002399 |
| Srfbp1       | 1540 | 547.5 | 4150.5 | 12.73672 | 89.96864 | 2.820429 | Up | 0        | 0        |
| Rlf          | 6213 | 1255  | 9476.5 | 7.209881 | 50.89006 | 2.819337 | Up | 5.54E-12 | 1.51E-11 |
| Cpg1         | 4207 | 3     | 23     | 0.025653 | 0.181031 | 2.819023 | Up | 0.000123 | 0.000225 |
| Klb-ps1      | 3557 | 6.5   | 49     | 0.065309 | 0.460431 | 2.817631 | Up | 1.62E-05 | 3.20E-05 |
| Itk          | 4199 | 3     | 23     | 0.025975 | 0.18309  | 2.817348 | Up | 0.000123 | 0.000225 |
| Hoxc6        | 1682 | 72    | 545.5  | 1.534471 | 10.81103 | 2.816691 | Up | 0        | 0        |
| LOC100362202 | 2649 | 121   | 913.5  | 1.635575 | 11.52167 | 2.81648  | Up | 0        | 0        |
| RGD1564664   | 1390 | 65.5  | 498.5  | 1.693408 | 11.92084 | 2.815485 | Up | 0        | 0        |
| Ctss         | 1330 | 5.5   | 41     | 0.146898 | 1.033955 | 2.815287 | Up | 2.77E-05 | 5.39E-05 |
| Pgf          | 1586 | 473   | 3568.5 | 10.66854 | 75.04911 | 2.814472 | Up | 5.88E-13 | 1.94E-12 |
| Siglec10     | 2373 | 68    | 513    | 1.026361 | 7.219146 | 2.814291 | Up | 0        | 0        |
| LOC100911882 | 2714 | 7     | 53     | 0.092927 | 0.653317 | 2.813618 | Up | 9.28E-06 | 1.86E-05 |
| Efcab11      | 1497 | 55    | 414    | 1.314298 | 9.233227 | 2.812542 | Up | 0        | 0        |
| LOC691636    | 572  | 1.5   | 11.5   | 0.094338 | 0.662584 | 2.812187 | Up | 0.003992 | 0.006454 |
| LOC100912887 | 1628 | 365.5 | 2729.5 | 7.984507 | 56.04008 | 2.811184 | Up | 6.76E-13 | 2.20E-12 |
| RGD1560046   | 2411 | 69    | 515.5  | 1.018128 | 7.14577  | 2.81117  | Up | 0        | 0        |
| Trim66       | 4047 | 4     | 30     | 0.035368 | 0.247938 | 2.809476 | Up | 4.94E-05 | 9.44E-05 |

|              |      |       |        |          |          |          |    |          |          |
|--------------|------|-------|--------|----------|----------|----------|----|----------|----------|
| Rag1         | 6537 | 9.5   | 71.5   | 0.052134 | 0.36497  | 2.807476 | Up | 2.92E-06 | 6.06E-06 |
| Adap2        | 1798 | 2     | 15     | 0.039803 | 0.278032 | 2.80429  | Up | 0.001428 | 0.002399 |
| Naglt1       | 2173 | 15.5  | 115    | 0.254582 | 1.775602 | 2.802107 | Up | 7.51E-08 | 1.68E-07 |
| LOC681820    | 1695 | 2.5   | 19     | 0.053285 | 0.371592 | 2.801917 | Up | 0.000237 | 0.000428 |
| Ehhadh       | 3097 | 50.5  | 377.5  | 0.584133 | 4.072932 | 2.801699 | Up | 3.62E-14 | 1.46E-13 |
| Zfp26        | 6741 | 335   | 2492   | 1.770453 | 12.32849 | 2.799805 | Up | 1.62E-13 | 6.00E-13 |
| LOC100911245 | 1147 | 109.5 | 818    | 3.412848 | 23.75537 | 2.799206 | Up | 0        | 0        |
| Zfp770       | 2621 | 191   | 1419.5 | 2.598222 | 18.08376 | 2.799098 | Up | 8.66E-14 | 3.37E-13 |
| LOC100362957 | 333  | 13.5  | 102    | 1.4412   | 10.01577 | 2.796931 | Up | 2.60E-07 | 5.70E-07 |
| Cdh11        | 5173 | 14    | 107    | 0.096842 | 0.673011 | 2.796921 | Up | 1.40E-07 | 3.11E-07 |
| LOC100366195 | 1074 | 2     | 15     | 0.067703 | 0.470486 | 2.796855 | Up | 0.001428 | 0.0024   |
| LOC683891    | 1533 | 3     | 22     | 0.069652 | 0.483829 | 2.796265 | Up | 0.000162 | 0.000294 |
| Tank         | 2077 | 696.5 | 5183   | 11.9947  | 83.30609 | 2.796025 | Up | 4.30E-13 | 1.46E-12 |
| Slc5a5       | 2862 | 19    | 140.5  | 0.237955 | 1.6464   | 2.790552 | Up | 6.02E-09 | 1.41E-08 |
| Dkk3         | 5010 | 44    | 324    | 0.313119 | 2.166333 | 2.790471 | Up | 8.13E-14 | 3.18E-13 |
| LOC100911850 | 1886 | 65    | 483    | 1.238419 | 8.565552 | 2.790047 | Up | 0        | 0        |
| Krt80        | 1359 | 8.5   | 63     | 0.224021 | 1.548395 | 2.78907  | Up | 5.24E-06 | 1.07E-05 |
| LOC100909763 | 539  | 53    | 389.5  | 3.494105 | 24.13899 | 2.78837  | Up | 4.04E-14 | 1.62E-13 |
| Cd101        | 3053 | 8     | 58.5   | 0.092638 | 0.638709 | 2.785475 | Up | 5.24E-06 | 1.07E-05 |
| Zfp141       | 4219 | 75.5  | 557    | 0.638107 | 4.395841 | 2.784269 | Up | 0        | 0        |
| Myh13        | 5678 | 6     | 44     | 0.037611 | 0.259038 | 2.783958 | Up | 1.62E-05 | 3.20E-05 |
| LOC499806    | 1679 | 17    | 125.5  | 0.361283 | 2.487787 | 2.783661 | Up | 2.14E-08 | 4.89E-08 |
| RGD1565073   | 312  | 2     | 15     | 0.22938  | 1.579173 | 2.783359 | Up | 0.001428 | 0.0024   |
| Xkr7         | 2718 | 16    | 119    | 0.212543 | 1.463072 | 2.783173 | Up | 4.01E-08 | 9.10E-08 |
| RGD1562465   | 942  | 56.5  | 416.5  | 2.143495 | 14.75367 | 2.783037 | Up | 1.58E-14 | 6.49E-14 |

|              |      |       |         |          |          |          |    |          |          |
|--------------|------|-------|---------|----------|----------|----------|----|----------|----------|
| Zfp46        | 4501 | 489.5 | 3600.5  | 3.893403 | 26.71792 | 2.778704 | Up | 5.92E-13 | 1.95E-12 |
| Nrap         | 5378 | 3     | 21.5    | 0.019641 | 0.134728 | 2.778107 | Up | 0.00023  | 0.000417 |
| LOC100912188 | 1479 | 21    | 154     | 0.507691 | 3.477599 | 2.77607  | Up | 1.68E-09 | 4.01E-09 |
| Ammecr1l     | 4267 | 893   | 6554    | 7.482283 | 51.25089 | 2.776027 | Up | 0        | 0        |
| Rhod         | 1486 | 39    | 287.5   | 0.941059 | 6.444588 | 2.775731 | Up | 1.32E-13 | 4.99E-13 |
| Zfp23        | 4888 | 192   | 1403    | 1.401807 | 9.578579 | 2.772524 | Up | 0        | 0        |
| LOC100361380 | 414  | 35    | 256     | 3.023767 | 20.65803 | 2.772284 | Up | 3.77E-13 | 1.30E-12 |
| Socs4        | 2037 | 385   | 2811    | 6.742604 | 46.06221 | 2.772206 | Up | 6.91E-13 | 2.24E-12 |
| LOC100174910 | 1114 | 157   | 1148    | 5.035338 | 34.37995 | 2.771407 | Up | 0        | 0        |
| Tcp11        | 1963 | 2.5   | 18      | 0.044842 | 0.306145 | 2.771298 | Up | 0.000337 | 0.000602 |
| LOC100125368 | 1990 | 143   | 1041    | 2.556086 | 17.44752 | 2.771014 | Up | 0        | 0        |
| LOC687141    | 1431 | 149   | 1091    | 3.727861 | 25.44291 | 2.770844 | Up | 2.66E-13 | 9.48E-13 |
| Zfp709l2     | 2382 | 114   | 831.5   | 1.706289 | 11.62904 | 2.768799 | Up | 7.79E-14 | 3.06E-13 |
| LOC297970    | 4512 | 9832  | 71519.5 | 77.72866 | 529.2402 | 2.767404 | Up | 0        | 0        |
| LOC682870    | 5492 | 103.5 | 750.5   | 0.672529 | 4.56545  | 2.763089 | Up | 0        | 0        |
| Mef2b        | 1346 | 21    | 153     | 0.558708 | 3.786391 | 2.760656 | Up | 1.68E-09 | 4.01E-09 |
| Ces2g        | 2480 | 3     | 22      | 0.043517 | 0.294722 | 2.759689 | Up | 0.000162 | 0.000294 |
| Manba        | 3688 | 53    | 384     | 0.514083 | 3.476528 | 2.757574 | Up | 4.04E-14 | 1.62E-13 |
| B3gntl1      | 1511 | 53    | 383.5   | 1.25248  | 8.465713 | 2.756844 | Up | 4.04E-14 | 1.62E-13 |
| Ddc8         | 1809 | 17    | 123.5   | 0.337222 | 2.276573 | 2.755092 | Up | 2.14E-08 | 4.90E-08 |
| Bpifc        | 2228 | 8     | 58      | 0.129    | 0.869944 | 2.753548 | Up | 5.24E-06 | 1.07E-05 |
| Trpm5        | 3471 | 3     | 22      | 0.031093 | 0.209539 | 2.752565 | Up | 0.000162 | 0.000294 |
| Enkur        | 1205 | 7.5   | 54.5    | 0.224859 | 1.514881 | 2.752114 | Up | 9.28E-06 | 1.86E-05 |
| Frm4b        | 5031 | 53    | 383.5   | 0.377763 | 2.544006 | 2.751549 | Up | 4.04E-14 | 1.62E-13 |
| Magi2        | 4767 | 4     | 29      | 0.030026 | 0.201976 | 2.749906 | Up | 5.21E-05 | 9.94E-05 |

|              |      |        |        |          |          |          |    |          |          |
|--------------|------|--------|--------|----------|----------|----------|----|----------|----------|
| Sbsn         | 690  | 9.5    | 68     | 0.488928 | 3.287686 | 2.749379 | Up | 2.92E-06 | 6.06E-06 |
| Snai2        | 807  | 741.5  | 5355   | 32.96168 | 221.5612 | 2.748844 | Up | 0        | 0        |
| Lctl         | 1371 | 4.5    | 32.5   | 0.11766  | 0.789804 | 2.746876 | Up | 4.70E-05 | 8.99E-05 |
| Txlnb        | 4044 | 8      | 57     | 0.070788 | 0.474592 | 2.745114 | Up | 5.24E-06 | 1.07E-05 |
| Dusp1        | 1940 | 378.5  | 2723   | 6.984228 | 46.78174 | 2.743773 | Up | 6.61E-13 | 2.16E-12 |
| Reep1        | 3680 | 2      | 14     | 0.019136 | 0.127993 | 2.741726 | Up | 0.002465 | 0.004058 |
| Klf10        | 2962 | 1451.5 | 10404  | 17.53165 | 117.2271 | 2.741273 | Up | 2.10E-12 | 6.25E-12 |
| Tusc5        | 3410 | 3.5    | 25     | 0.036812 | 0.245827 | 2.739406 | Up | 8.88E-05 | 0.000166 |
| Ushbp1       | 2483 | 8.5    | 60.5   | 0.12215  | 0.814761 | 2.737729 | Up | 5.24E-06 | 1.07E-05 |
| Cxcr4        | 1726 | 8      | 57     | 0.165855 | 1.106227 | 2.737653 | Up | 5.24E-06 | 1.07E-05 |
| LOC100362987 | 283  | 4.5    | 32.5   | 0.563926 | 3.759437 | 2.73694  | Up | 4.70E-05 | 8.99E-05 |
| Gnat2        | 1525 | 3      | 21     | 0.069265 | 0.461523 | 2.736202 | Up | 0.00023  | 0.000416 |
| LOC100910406 | 442  | 424.5  | 3032.5 | 34.36064 | 228.8433 | 2.735532 | Up | 0        | 0        |
| LOC100912058 | 686  | 15.5   | 111    | 0.811439 | 5.403551 | 2.735353 | Up | 7.51E-08 | 1.69E-07 |
| Ccdc79       | 2325 | 5      | 35.5   | 0.076707 | 0.510745 | 2.735181 | Up | 2.84E-05 | 5.54E-05 |
| Slc12a3      | 4382 | 8      | 57     | 0.065328 | 0.434082 | 2.732202 | Up | 5.24E-06 | 1.07E-05 |
| LOC100360852 | 351  | 2      | 14.5   | 0.203893 | 1.352303 | 2.729534 | Up | 0.002465 | 0.004059 |
| LOC100364391 | 1783 | 2328.5 | 16495  | 46.6166  | 309.0877 | 2.7291   | Up | 0        | 0        |
| RGD1306880   | 2374 | 3      | 21     | 0.044494 | 0.294955 | 2.728803 | Up | 0.00023  | 0.000416 |
| LOC100911556 | 624  | 29     | 206.5  | 1.660246 | 11.00469 | 2.728649 | Up | 1.04E-11 | 2.73E-11 |
| Tm4sf19      | 766  | 9.5    | 68     | 0.445658 | 2.950918 | 2.727154 | Up | 2.92E-06 | 6.06E-06 |
| LOC683963    | 792  | 32     | 229.5  | 1.457372 | 9.643336 | 2.726163 | Up | 1.74E-12 | 5.25E-12 |
| Fam65c       | 2817 | 15     | 107    | 0.19115  | 1.26432  | 2.725586 | Up | 7.51E-08 | 1.68E-07 |
| RGD1561916   | 1122 | 2      | 14     | 0.063785 | 0.421404 | 2.723922 | Up | 0.002465 | 0.00406  |
| RGD1305537   | 1717 | 171.5  | 1203.5 | 3.544264 | 23.39952 | 2.722921 | Up | 3.66E-13 | 1.27E-12 |

|              |      |       |        |          |          |          |    |          |          |
|--------------|------|-------|--------|----------|----------|----------|----|----------|----------|
| Slc38a3      | 2354 | 14    | 99     | 0.212814 | 1.404883 | 2.722782 | Up | 1.40E-07 | 3.11E-07 |
| Fam151b      | 1377 | 8     | 57     | 0.208724 | 1.37745  | 2.722332 | Up | 5.24E-06 | 1.07E-05 |
| LOC100360638 | 3569 | 245.5 | 1734   | 2.454263 | 16.19401 | 2.722098 | Up | 3.55E-13 | 1.23E-12 |
| Itgb2        | 3161 | 16.5  | 116    | 0.185967 | 1.222642 | 2.71688  | Up | 4.01E-08 | 9.11E-08 |
| Atp8b3       | 4100 | 4     | 28     | 0.034631 | 0.227568 | 2.716175 | Up | 5.69E-05 | 0.000108 |
| Pigr         | 3923 | 81.5  | 570    | 0.738643 | 4.853067 | 2.715948 | Up | 5.82E-14 | 2.30E-13 |
| Trmt11       | 2642 | 536   | 3766   | 7.249597 | 47.58767 | 2.714615 | Up | 0        | 0        |
| Dnajb13      | 2280 | 24.5  | 172    | 0.383381 | 2.516286 | 2.714445 | Up | 2.47E-10 | 6.04E-10 |
| Etv3l        | 1783 | 2.5   | 17.5   | 0.04969  | 0.325922 | 2.713489 | Up | 0.000518 | 0.000914 |
| LOC366449    | 1184 | 5     | 35     | 0.150627 | 0.987701 | 2.713092 | Up | 2.84E-05 | 5.54E-05 |
| Esam         | 1837 | 2     | 14     | 0.038958 | 0.255425 | 2.712895 | Up | 0.002465 | 0.004059 |
| Sec14l5      | 2233 | 4     | 28.5   | 0.064613 | 0.423499 | 2.712473 | Up | 5.69E-05 | 0.000108 |
| LOC100911299 | 1145 | 34.5  | 242.5  | 1.076933 | 7.05725  | 2.712178 | Up | 5.99E-13 | 1.97E-12 |
| Fam167a      | 3483 | 465.5 | 3264.5 | 4.776883 | 31.27206 | 2.710733 | Up | 0        | 0        |
| Mettl6       | 1671 | 577.5 | 4040.5 | 12.33431 | 80.69447 | 2.709793 | Up | 5.81E-13 | 1.92E-12 |
| Mir881       | 77   | 3     | 21     | 1.386705 | 9.070428 | 2.70951  | Up | 0.00023  | 0.000416 |
| Slc4a9       | 3175 | 3     | 21     | 0.03363  | 0.219976 | 2.70951  | Up | 0.00023  | 0.000416 |
| LOC100362270 | 1004 | 4     | 28     | 0.142563 | 0.931106 | 2.70735  | Up | 5.69E-05 | 0.000108 |
| LOC689959    | 1347 | 8.5   | 59.5   | 0.227294 | 1.484459 | 2.707308 | Up | 5.24E-06 | 1.07E-05 |
| Adam1a       | 2917 | 24    | 167    | 0.292052 | 1.905553 | 2.705911 | Up | 2.47E-10 | 6.04E-10 |
| Pdik1l       | 4489 | 195   | 1363   | 1.551852 | 10.11522 | 2.704465 | Up | 1.92E-13 | 7.02E-13 |
| Zfp445       | 6069 | 933.5 | 6470   | 5.481727 | 35.58316 | 2.698492 | Up | 3.87E-13 | 1.32E-12 |
| Pih1d2       | 1304 | 176   | 1226   | 4.828759 | 31.32142 | 2.697425 | Up | 0        | 0        |
| Ppp1r10      | 4170 | 2814  | 19594  | 24.18108 | 156.7729 | 2.696726 | Up | 0        | 0        |
| Zfp939       | 3144 | 6     | 41.5   | 0.067924 | 0.440268 | 2.696392 | Up | 1.63E-05 | 3.22E-05 |

|            |      |       |        |          |          |          |    |          |          |
|------------|------|-------|--------|----------|----------|----------|----|----------|----------|
| Cilp2      | 4081 | 6     | 42     | 0.052891 | 0.342721 | 2.695955 | Up | 1.62E-05 | 3.21E-05 |
| Slc10a5    | 1305 | 19.5  | 135.5  | 0.533154 | 3.454531 | 2.695865 | Up | 6.02E-09 | 1.41E-08 |
| Ctrb1      | 792  | 127   | 881.5  | 5.730004 | 37.12503 | 2.695784 | Up | 9.17E-14 | 3.56E-13 |
| Meis1      | 2506 | 595.5 | 4138   | 8.503959 | 55.08932 | 2.695566 | Up | 1.07E-12 | 3.35E-12 |
| Trim17     | 1703 | 3     | 21     | 0.063372 | 0.410113 | 2.694097 | Up | 0.00023  | 0.000416 |
| Cd46       | 1192 | 26    | 179.5  | 0.778101 | 5.031781 | 2.693039 | Up | 6.87E-11 | 1.72E-10 |
| RGD1307621 | 1267 | 34    | 235    | 0.954361 | 6.169061 | 2.692444 | Up | 5.99E-13 | 1.97E-12 |
| Rnf144b    | 3160 | 121.5 | 837    | 1.374482 | 8.870052 | 2.690055 | Up | 0        | 0        |
| Eml2       | 2490 | 3     | 21     | 0.043803 | 0.28266  | 2.689959 | Up | 0.00023  | 0.000417 |
| Acta1      | 1518 | 55.5  | 381    | 1.292981 | 8.317439 | 2.685438 | Up | 0        | 0        |
| Ing3       | 2210 | 566.5 | 3904   | 9.171322 | 58.94616 | 2.684196 | Up | 8.82E-14 | 3.43E-13 |
| Spata1     | 1897 | 15    | 102    | 0.28083  | 1.804668 | 2.683965 | Up | 7.51E-08 | 1.68E-07 |
| Slc10a1    | 1663 | 4     | 27.5   | 0.086759 | 0.556697 | 2.681812 | Up | 6.52E-05 | 0.000124 |
| Ppm1k      | 2624 | 251.5 | 1730.5 | 3.426949 | 21.94502 | 2.678896 | Up | 1.37E-13 | 5.15E-13 |
| Ifi204     | 1768 | 1096  | 7515.5 | 22.16745 | 141.8411 | 2.677761 | Up | 4.94E-12 | 1.36E-11 |
| Ccdc58     | 1216 | 795   | 5436   | 23.33127 | 149.196  | 2.676872 | Up | 0        | 0        |
| Ceacam9    | 980  | 2.5   | 17     | 0.091576 | 0.585588 | 2.676839 | Up | 0.000518 | 0.000914 |
| Pnma2      | 3327 | 9     | 62     | 0.096626 | 0.617307 | 2.675501 | Up | 2.92E-06 | 6.05E-06 |
| Stx11      | 1642 | 251   | 1717.5 | 5.46048  | 34.87125 | 2.674938 | Up | 1.37E-13 | 5.15E-13 |
| Amn1       | 1310 | 249.5 | 1700.5 | 6.793973 | 43.34979 | 2.673698 | Up | 1.13E-14 | 4.69E-14 |
| Gimap9     | 1700 | 23.5  | 160    | 0.49347  | 3.144406 | 2.671753 | Up | 4.68E-10 | 1.13E-09 |
| Mis18a     | 1099 | 892.5 | 6091.5 | 28.97589 | 184.6348 | 2.671749 | Up | 4.11E-13 | 1.40E-12 |
| Spata18    | 2052 | 3     | 20.5   | 0.052594 | 0.335078 | 2.671523 | Up | 0.000351 | 0.000627 |
| Rsph3      | 1896 | 44    | 300    | 0.831017 | 5.290319 | 2.670404 | Up | 8.13E-14 | 3.18E-13 |
| Snap25     | 2135 | 5.5   | 37     | 0.091779 | 0.583238 | 2.667852 | Up | 2.79E-05 | 5.43E-05 |

|              |       |       |        |          |          |          |    |          |          |
|--------------|-------|-------|--------|----------|----------|----------|----|----------|----------|
| Pou4f3       | 2272  | 2     | 13.5   | 0.031499 | 0.200164 | 2.667788 | Up | 0.004296 | 0.006925 |
| LOC498826    | 771   | 247.5 | 1672.5 | 11.42101 | 72.50817 | 2.666453 | Up | 0        | 0        |
| LOC501406    | 12571 | 303.5 | 2055.5 | 0.862062 | 5.465957 | 2.66461  | Up | 2.56E-13 | 9.16E-13 |
| LOC100361238 | 1547  | 9     | 61.5   | 0.208918 | 1.324653 | 2.664607 | Up | 2.92E-06 | 6.05E-06 |
| Dcst1        | 2205  | 4     | 27.5   | 0.065953 | 0.417817 | 2.663359 | Up | 6.52E-05 | 0.000124 |
| Slc7a3       | 2152  | 2     | 13.5   | 0.033256 | 0.210489 | 2.662066 | Up | 0.004296 | 0.006929 |
| LOC679087    | 3836  | 78    | 525    | 0.722821 | 4.57124  | 2.660875 | Up | 0        | 0        |
| Pigl         | 1410  | 100   | 677    | 2.535378 | 16.03296 | 2.660768 | Up | 1.75E-14 | 7.19E-14 |
| LOC100361997 | 1421  | 247.5 | 1670   | 6.201203 | 39.15417 | 2.658546 | Up | 0        | 0        |
| RGD1562550   | 726   | 30    | 204    | 1.480226 | 9.344227 | 2.658258 | Up | 5.60E-12 | 1.52E-11 |
| LOC100360287 | 3434  | 105.5 | 710    | 1.095248 | 6.912358 | 2.65792  | Up | 0        | 0        |
| Zswim6       | 5258  | 765   | 5161.5 | 5.195725 | 32.77518 | 2.657207 | Up | 0        | 0        |
| LOC501386    | 549   | 27.5  | 185.5  | 1.792943 | 11.30474 | 2.656527 | Up | 3.64E-11 | 9.17E-11 |
| Sh2b2        | 2856  | 24    | 161.5  | 0.300298 | 1.891569 | 2.655117 | Up | 2.47E-10 | 6.04E-10 |
| Hsd17b13     | 1323  | 4     | 27.5   | 0.109055 | 0.686838 | 2.654914 | Up | 6.52E-05 | 0.000124 |
| LOC688903    | 721   | 20    | 134    | 0.986237 | 6.200045 | 2.652272 | Up | 3.18E-09 | 7.52E-09 |
| Serpine3     | 1407  | 4     | 27     | 0.101729 | 0.638766 | 2.650554 | Up | 6.52E-05 | 0.000124 |
| Letm2        | 1787  | 143   | 962.5  | 2.863781 | 17.95862 | 2.648684 | Up | 0        | 0        |
| LOC363324    | 963   | 8.5   | 57.5   | 0.316141 | 1.979949 | 2.646821 | Up | 5.24E-06 | 1.07E-05 |
| Sult1b1      | 1276  | 17.5  | 116.5  | 0.489185 | 3.062707 | 2.646357 | Up | 2.14E-08 | 4.89E-08 |
| Suv420h1     | 6096  | 832   | 5570   | 4.875053 | 30.49093 | 2.644891 | Up | 0        | 0        |
| Tsga10ip     | 1824  | 3     | 20     | 0.059168 | 0.370031 | 2.644748 | Up | 0.000351 | 0.000627 |
| RGD1564425   | 618   | 3     | 20     | 0.172777 | 1.080479 | 2.644687 | Up | 0.000351 | 0.000627 |
| Trit1        | 2113  | 389   | 2593.5 | 6.563755 | 40.96902 | 2.64194  | Up | 0        | 0        |
| Rbm39        | 2041  | 1238  | 8262   | 21.64699 | 135.0449 | 2.641201 | Up | 2.93E-12 | 8.49E-12 |

|              |      |        |        |          |          |          |    |          |          |
|--------------|------|--------|--------|----------|----------|----------|----|----------|----------|
| LOC367042    | 1085 | 5.5    | 36.5   | 0.178483 | 1.112782 | 2.640313 | Up | 2.81E-05 | 5.47E-05 |
| Avpr2        | 1116 | 6      | 40.5   | 0.193411 | 1.203957 | 2.638044 | Up | 1.64E-05 | 3.23E-05 |
| Slc25a34     | 1337 | 9.5    | 64     | 0.255757 | 1.59144  | 2.637485 | Up | 2.92E-06 | 6.05E-06 |
| Inpp4b       | 4398 | 58     | 389    | 0.473989 | 2.948538 | 2.637075 | Up | 1.35E-14 | 5.59E-14 |
| Hdgl1        | 2068 | 8      | 52.5   | 0.136485 | 0.846933 | 2.633501 | Up | 5.24E-06 | 1.07E-05 |
| LOC501421    | 711  | 72.5   | 483    | 3.660477 | 22.71214 | 2.63336  | Up | 0        | 0        |
| Birc2        | 2907 | 759.5  | 5018.5 | 9.301498 | 57.58949 | 2.630271 | Up | 1.87E-12 | 5.61E-12 |
| Stambp       | 1735 | 398.5  | 2639   | 8.19583  | 50.73383 | 2.629986 | Up | 5.90E-13 | 1.95E-12 |
| Pnlcd1       | 2027 | 26     | 172    | 0.457854 | 2.830356 | 2.628024 | Up | 6.87E-11 | 1.72E-10 |
| RGD1566400   | 3921 | 7      | 46     | 0.063736 | 0.39398  | 2.627938 | Up | 9.30E-06 | 1.87E-05 |
| RGD1309748   | 3841 | 1177.5 | 7766.5 | 10.92159 | 67.5012  | 2.62773  | Up | 2.81E-12 | 8.18E-12 |
| Wisp1        | 1888 | 380.5  | 2516   | 7.216318 | 44.47167 | 2.623552 | Up | 0        | 0        |
| Irf2         | 1368 | 289.5  | 1910   | 7.561859 | 46.59818 | 2.623461 | Up | 0        | 0        |
| Frmpr4       | 5123 | 3      | 20     | 0.021066 | 0.129638 | 2.621475 | Up | 0.000351 | 0.000627 |
| Chic2        | 961  | 583.5  | 3831   | 21.65078 | 133.0478 | 2.619454 | Up | 5.08E-13 | 1.70E-12 |
| Cyp27b1      | 2426 | 33.5   | 220    | 0.495421 | 3.036562 | 2.615711 | Up | 1.01E-12 | 3.18E-12 |
| Gata3        | 1335 | 43     | 283.5  | 1.157293 | 7.082255 | 2.613454 | Up | 1.18E-13 | 4.48E-13 |
| Pglyrp1      | 630  | 18.5   | 121.5  | 1.052143 | 6.435314 | 2.61268  | Up | 1.14E-08 | 2.63E-08 |
| Ngf          | 1162 | 763.5  | 5011.5 | 23.56417 | 144.0321 | 2.611723 | Up | 8.47E-13 | 2.71E-12 |
| LOC100911217 | 501  | 2      | 13     | 0.142847 | 0.871714 | 2.609382 | Up | 0.004296 | 0.006927 |
| Il9r         | 3692 | 7      | 45.5   | 0.067379 | 0.411092 | 2.609094 | Up | 9.32E-06 | 1.87E-05 |
| Ccdc112      | 2220 | 547    | 3574   | 8.817635 | 53.738   | 2.607479 | Up | 0        | 0        |
| Agbl4        | 675  | 14.5   | 94.5   | 0.765703 | 4.661487 | 2.605932 | Up | 1.40E-07 | 3.11E-07 |
| Trim31       | 2451 | 12.5   | 81     | 0.182142 | 1.108132 | 2.604994 | Up | 4.81E-07 | 1.04E-06 |
| Gcm2         | 3365 | 2      | 13     | 0.021097 | 0.128181 | 2.603038 | Up | 0.004296 | 0.006925 |



|              |      |        |        |          |          |          |    |          |          |
|--------------|------|--------|--------|----------|----------|----------|----|----------|----------|
| Apom         | 787  | 10     | 65     | 0.454679 | 2.760919 | 2.602228 | Up | 1.61E-06 | 3.40E-06 |
| Siae         | 3460 | 450.5  | 2934   | 4.659805 | 28.27535 | 2.601203 | Up | 1.46E-12 | 4.47E-12 |
| Ppp1r32      | 1491 | 4      | 26     | 0.096767 | 0.587027 | 2.600838 | Up | 7.99E-05 | 0.00015  |
| RGD1307934   | 2556 | 317.5  | 2059.5 | 4.432453 | 26.8784  | 2.60027  | Up | 2.57E-13 | 9.19E-13 |
| Rxfp1        | 2277 | 27     | 175    | 0.423048 | 2.564775 | 2.599939 | Up | 3.64E-11 | 9.17E-11 |
| Nupl2        | 2435 | 388.5  | 2521.5 | 5.705502 | 34.55527 | 2.59848  | Up | 6.64E-13 | 2.16E-12 |
| Peo1         | 3601 | 843    | 5464   | 8.360352 | 50.6097  | 2.597778 | Up | 2.43E-12 | 7.16E-12 |
| LOC100909512 | 2496 | 11     | 71     | 0.157009 | 0.950426 | 2.597724 | Up | 8.84E-07 | 1.88E-06 |
| LOC100360623 | 6076 | 34     | 220    | 0.199669 | 1.208574 | 2.597624 | Up | 5.99E-13 | 1.97E-12 |
| Adam4        | 2472 | 26     | 168.5  | 0.376825 | 2.280675 | 2.597495 | Up | 6.87E-11 | 1.72E-10 |
| Syt16        | 3051 | 2      | 13     | 0.023457 | 0.141963 | 2.59744  | Up | 0.004296 | 0.006928 |
| LOC100911030 | 685  | 4      | 26     | 0.210627 | 1.272492 | 2.594892 | Up | 7.99E-05 | 0.00015  |
| LOC100910868 | 2216 | 4.5    | 29     | 0.072535 | 0.43814  | 2.594639 | Up | 5.21E-05 | 9.94E-05 |
| LOC100910297 | 1118 | 6      | 39     | 0.193065 | 1.164656 | 2.592748 | Up | 1.65E-05 | 3.26E-05 |
| Cwc15        | 1376 | 2551.5 | 16428  | 66.13008 | 398.8319 | 2.592402 | Up | 0        | 0        |
| LOC100912695 | 796  | 8      | 51.5   | 0.35819  | 2.15725  | 2.590397 | Up | 5.24E-06 | 1.07E-05 |
| LOC100909641 | 1941 | 16.5   | 107    | 0.304924 | 1.835388 | 2.589565 | Up | 4.01E-08 | 9.10E-08 |
| LOC499418    | 1336 | 2      | 13     | 0.053568 | 0.321503 | 2.585398 | Up | 0.004296 | 0.006929 |
| Htr1d        | 1125 | 8      | 51     | 0.25242  | 1.514336 | 2.584789 | Up | 5.24E-06 | 1.07E-05 |
| LOC100911950 | 1020 | 35     | 224.5  | 1.223921 | 7.341754 | 2.584615 | Up | 3.77E-13 | 1.30E-12 |
| LOC100910201 | 2116 | 189.5  | 1212   | 3.198226 | 19.12836 | 2.580369 | Up | 2.87E-13 | 1.02E-12 |
| Slc26a5      | 2235 | 3      | 19     | 0.047261 | 0.282617 | 2.580113 | Up | 0.000562 | 0.000989 |
| Pxdc1        | 1815 | 888    | 5685   | 17.48474 | 104.5003 | 2.57934  | Up | 0        | 0        |
| Myliip       | 3069 | 20     | 127    | 0.23207  | 1.385411 | 2.577679 | Up | 3.18E-09 | 7.52E-09 |
| Depdc7       | 1732 | 1117.5 | 7141   | 23.06163 | 137.5684 | 2.576583 | Up | 4.68E-12 | 1.29E-11 |

|              |       |        |         |          |          |          |    |          |          |
|--------------|-------|--------|---------|----------|----------|----------|----|----------|----------|
| Rfc5         | 1644  | 2909   | 18575.5 | 63.20381 | 376.946  | 2.576275 | Up | 0        | 0        |
| Arhgef15     | 3641  | 9      | 57.5    | 0.088293 | 0.526392 | 2.575761 | Up | 2.92E-06 | 6.05E-06 |
| Dnase1l3     | 1417  | 8      | 51      | 0.201213 | 1.198467 | 2.574393 | Up | 5.24E-06 | 1.07E-05 |
| LOC100910680 | 1043  | 3      | 19      | 0.102374 | 0.60906  | 2.572732 | Up | 0.000562 | 0.000989 |
| Zan          | 14777 | 8      | 50.5    | 0.019217 | 0.114312 | 2.572505 | Up | 5.25E-06 | 1.07E-05 |
| LOC691962    | 435   | 144    | 917     | 11.8323  | 70.30231 | 2.570841 | Up | 1.05E-13 | 4.06E-13 |
| Fbxo4        | 1993  | 165    | 1048.5  | 2.954141 | 17.55164 | 2.570795 | Up | 4.11E-14 | 1.65E-13 |
| LOC100910900 | 1000  | 66.5   | 423     | 2.379298 | 14.11902 | 2.569032 | Up | 0        | 0        |
| RGD1308114   | 1734  | 11     | 69.5    | 0.226006 | 1.340504 | 2.568339 | Up | 8.84E-07 | 1.88E-06 |
| Atp2a3       | 4472  | 30     | 191.5   | 0.241074 | 1.42959  | 2.568051 | Up | 5.60E-12 | 1.52E-11 |
| Popdc2       | 2243  | 25     | 159.5   | 0.399599 | 2.369526 | 2.567972 | Up | 1.30E-10 | 3.22E-10 |
| Il23a        | 1568  | 44     | 279     | 1.00339  | 5.94236  | 2.566154 | Up | 8.13E-14 | 3.18E-13 |
| LOC100909776 | 656   | 8.5    | 54      | 0.464092 | 2.748305 | 2.56606  | Up | 5.24E-06 | 1.07E-05 |
| Rassf6       | 1948  | 11.5   | 72.5    | 0.209921 | 1.24281  | 2.565685 | Up | 8.84E-07 | 1.88E-06 |
| Gnl3         | 1810  | 2022   | 12772   | 39.79098 | 235.4559 | 2.564943 | Up | 0        | 0        |
| Dcx          | 8827  | 11.5   | 72.5    | 0.046327 | 0.274067 | 2.564612 | Up | 8.84E-07 | 1.88E-06 |
| LOC500034    | 4208  | 1163.5 | 7325    | 9.827256 | 58.11556 | 2.564064 | Up | 4.69E-12 | 1.29E-11 |
| Agphd1       | 2504  | 29     | 183     | 0.413277 | 2.443964 | 2.564041 | Up | 1.04E-11 | 2.73E-11 |
| LOC100910727 | 1172  | 355.5  | 2257.5  | 10.86701 | 64.25382 | 2.563827 | Up | 5.33E-13 | 1.78E-12 |
| Asb15        | 2075  | 51     | 323.5   | 0.878662 | 5.19363  | 2.563362 | Up | 8.44E-15 | 3.52E-14 |
| LOC100909462 | 1386  | 11.5   | 72      | 0.292972 | 1.730484 | 2.562339 | Up | 8.84E-07 | 1.88E-06 |
| Hbegf        | 1550  | 2630.5 | 16642.5 | 60.68895 | 358.4318 | 2.562193 | Up | 0        | 0        |
| RGD1303142   | 1566  | 923.5  | 5846.5  | 21.09638 | 124.5615 | 2.561791 | Up | 0        | 0        |
| Ccdc13       | 1986  | 10     | 64      | 0.181332 | 1.070471 | 2.561537 | Up | 1.61E-06 | 3.40E-06 |
| LOC100912996 | 943   | 389.5  | 2456    | 14.74871 | 87.06322 | 2.561474 | Up | 0        | 0        |

|              |      |       |        |          |          |          |    |          |          |
|--------------|------|-------|--------|----------|----------|----------|----|----------|----------|
| Gjb1         | 1555 | 2     | 13     | 0.046023 | 0.271594 | 2.561009 | Up | 0.004296 | 0.00693  |
| Vom2r52      | 2583 | 23.5  | 147.5  | 0.323001 | 1.904957 | 2.560148 | Up | 4.68E-10 | 1.14E-09 |
| Als2cr12     | 1874 | 20    | 127    | 0.38128  | 2.247238 | 2.559232 | Up | 3.18E-09 | 7.52E-09 |
| Aplf         | 2572 | 208.5 | 1315   | 2.894648 | 17.0583  | 2.559014 | Up | 3.49E-13 | 1.21E-12 |
| Zfp608       | 6070 | 803.5 | 5075.5 | 4.740063 | 27.91891 | 2.558265 | Up | 2.31E-14 | 9.44E-14 |
| Zfp786       | 2794 | 35    | 222    | 0.449277 | 2.645695 | 2.557969 | Up | 3.77E-13 | 1.30E-12 |
| RGD1562626   | 2289 | 128   | 804.5  | 1.993469 | 11.73208 | 2.557106 | Up | 3.69E-14 | 1.49E-13 |
| LOC100911353 | 718  | 25    | 156    | 1.238746 | 7.290311 | 2.5571   | Up | 1.30E-10 | 3.22E-10 |
| Dusp13       | 1296 | 5     | 32     | 0.13938  | 0.820199 | 2.55695  | Up | 3.19E-05 | 6.19E-05 |
| N5           | 2162 | 15.5  | 97     | 0.254286 | 1.49543  | 2.556038 | Up | 7.51E-08 | 1.68E-07 |
| Zfp655       | 4024 | 1016  | 6381.5 | 9.005092 | 52.92544 | 2.555149 | Up | 3.94E-13 | 1.35E-12 |
| Rasgrp4      | 2164 | 5.5   | 34.5   | 0.090549 | 0.532068 | 2.554843 | Up | 2.90E-05 | 5.65E-05 |
| LOC683603    | 2171 | 20    | 126    | 0.330176 | 1.937696 | 2.553036 | Up | 3.18E-09 | 7.52E-09 |
| Rnf39        | 2001 | 62    | 389.5  | 1.105287 | 6.484664 | 2.552611 | Up | 0        | 0        |
| Nfkbid       | 2013 | 81.5  | 515    | 1.455159 | 8.537113 | 2.552571 | Up | 5.82E-14 | 2.30E-13 |
| LOC100912731 | 1179 | 478.5 | 2980.5 | 14.41838 | 84.4561  | 2.550292 | Up | 1.04E-12 | 3.26E-12 |
| Cacna1d      | 7986 | 32.5  | 204    | 0.146163 | 0.855561 | 2.549295 | Up | 1.74E-12 | 5.25E-12 |
| Phospho2     | 2131 | 316.5 | 1980.5 | 5.304769 | 31.04389 | 2.548948 | Up | 3.85E-13 | 1.32E-12 |
| Efemp1       | 2038 | 3     | 19.5   | 0.053518 | 0.313048 | 2.548285 | Up | 0.000562 | 0.000989 |
| Etl4         | 7387 | 16    | 99.5   | 0.07704  | 0.450377 | 2.547463 | Up | 4.01E-08 | 9.10E-08 |
| Dsc3         | 2878 | 5.5   | 34.5   | 0.068882 | 0.401944 | 2.544803 | Up | 2.90E-05 | 5.65E-05 |
| Blk          | 2290 | 40.5  | 253    | 0.632722 | 3.689766 | 2.543885 | Up | 1.16E-13 | 4.43E-13 |
| Rccd1        | 1137 | 105   | 656    | 3.301999 | 19.24771 | 2.543276 | Up | 0        | 0        |
| Murc         | 1089 | 7.5   | 46.5   | 0.245125 | 1.4285   | 2.542914 | Up | 9.30E-06 | 1.87E-05 |
| LOC100360752 | 1118 | 40    | 248    | 1.276155 | 7.434195 | 2.542372 | Up | 1.16E-13 | 4.44E-13 |

|              |      |        |       |          |          |          |    |          |          |
|--------------|------|--------|-------|----------|----------|----------|----|----------|----------|
| RGD1624210   | 1617 | 4      | 25    | 0.088518 | 0.515628 | 2.542294 | Up | 0.000105 | 0.000196 |
| Irg1         | 2143 | 9      | 56    | 0.149477 | 0.870351 | 2.541675 | Up | 2.92E-06 | 6.05E-06 |
| Sfxn4        | 1304 | 61     | 378.5 | 1.662915 | 9.680182 | 2.54132  | Up | 3.49E-14 | 1.41E-13 |
| Lyve1        | 3083 | 5      | 31    | 0.057475 | 0.334249 | 2.539915 | Up | 3.51E-05 | 6.79E-05 |
| Znf397       | 2027 | 70     | 434.5 | 1.22979  | 7.142683 | 2.538054 | Up | 0        | 0        |
| LOC100909579 | 2044 | 38     | 237   | 0.665246 | 3.861044 | 2.537031 | Up | 1.45E-13 | 5.43E-13 |
| Hpgd         | 1728 | 5      | 31    | 0.103208 | 0.598432 | 2.535639 | Up | 3.51E-05 | 6.79E-05 |
| Il11         | 1674 | 198    | 1225  | 4.224204 | 24.48235 | 2.53499  | Up | 0        | 0        |
| Nudt7        | 2877 | 88     | 547   | 1.091527 | 6.323699 | 2.534421 | Up | 1.80E-14 | 7.37E-14 |
| Mafk         | 2670 | 1026.5 | 6367  | 13.75249 | 79.59578 | 2.532999 | Up | 2.32E-12 | 6.87E-12 |
| Gucy2g       | 3442 | 6      | 37    | 0.062043 | 0.358632 | 2.531161 | Up | 1.71E-05 | 3.38E-05 |
| Dctn3l1      | 561  | 4      | 24.5  | 0.25105  | 1.449245 | 2.529254 | Up | 0.00015  | 0.000273 |
| Pkd1l1       | 7851 | 23.5   | 144.5 | 0.106487 | 0.614666 | 2.529122 | Up | 4.68E-10 | 1.13E-09 |
| RGD1562963   | 1609 | 23     | 142   | 0.509725 | 2.939793 | 2.527924 | Up | 4.68E-10 | 1.14E-09 |
| Egr1         | 1527 | 5516   | 34236 | 129.9384 | 748.9387 | 2.52702  | Up | 2.72E-11 | 6.93E-11 |
| LOC100910671 | 2938 | 38     | 234   | 0.461648 | 2.65882  | 2.525921 | Up | 1.45E-13 | 5.43E-13 |
| Neu4         | 2545 | 5.5    | 33.5  | 0.076543 | 0.440357 | 2.52434  | Up | 3.01E-05 | 5.85E-05 |
| Thrsp        | 1300 | 4      | 24.5  | 0.10922  | 0.627482 | 2.522337 | Up | 0.00015  | 0.000273 |
| LOC100909849 | 3376 | 102    | 629   | 1.081808 | 6.211938 | 2.521599 | Up | 0        | 0        |
| Mmp12        | 1831 | 13     | 79.5  | 0.254059 | 1.457238 | 2.520001 | Up | 2.60E-07 | 5.70E-07 |
| LOC100362429 | 927  | 8      | 48.5  | 0.305097 | 1.748231 | 2.518554 | Up | 5.27E-06 | 1.07E-05 |
| Aox4         | 4879 | 3      | 18.5  | 0.021885 | 0.125396 | 2.518483 | Up | 0.000929 | 0.001583 |
| RGD1305539   | 3039 | 5      | 30.5  | 0.058685 | 0.336113 | 2.517891 | Up | 4.05E-05 | 7.83E-05 |
| LOC100911641 | 3719 | 71     | 433   | 0.680214 | 3.890586 | 2.515928 | Up | 0        | 0        |
| LOC691135    | 2235 | 81.5   | 500.5 | 1.306258 | 7.469507 | 2.515573 | Up | 5.82E-14 | 2.30E-13 |

|              |       |        |         |          |          |          |    |          |          |
|--------------|-------|--------|---------|----------|----------|----------|----|----------|----------|
| Hmox2-ps1    | 2211  | 1337   | 8168.5  | 21.61751 | 123.3069 | 2.511981 | Up | 8.66E-12 | 2.29E-11 |
| Fam35a       | 3372  | 354.5  | 2163.5  | 3.754511 | 21.40641 | 2.511346 | Up | 0        | 0        |
| Tmem86b      | 1123  | 19.5   | 119.5   | 0.623135 | 3.552337 | 2.511153 | Up | 6.02E-09 | 1.41E-08 |
| Slc16a4      | 1981  | 10     | 60.5    | 0.179474 | 1.023045 | 2.511021 | Up | 1.61E-06 | 3.40E-06 |
| RGD1310788   | 2173  | 27     | 164.5   | 0.444614 | 2.534276 | 2.510947 | Up | 3.64E-11 | 9.17E-11 |
| Rsb1         | 6739  | 426    | 2590.5  | 2.251625 | 12.8341  | 2.510944 | Up | 5.03E-13 | 1.69E-12 |
| Lrrc17       | 2071  | 2.5    | 15      | 0.042503 | 0.242251 | 2.510854 | Up | 0.001428 | 0.0024   |
| Tgm1         | 2707  | 63     | 383.5   | 0.830453 | 4.7304   | 2.509992 | Up | 0        | 0        |
| Asmt         | 1548  | 10     | 61.5    | 0.231899 | 1.320309 | 2.509309 | Up | 1.61E-06 | 3.40E-06 |
| Ctrl         | 798   | 10     | 61      | 0.451286 | 2.569043 | 2.509118 | Up | 1.61E-06 | 3.40E-06 |
| RGD1560436   | 1083  | 37     | 226     | 1.225159 | 6.968808 | 2.507943 | Up | 1.86E-13 | 6.81E-13 |
| Ttll13       | 3394  | 30.5   | 185.5   | 0.319621 | 1.817738 | 2.50771  | Up | 5.60E-12 | 1.52E-11 |
| Hoxa9l       | 2216  | 24.5   | 149     | 0.394453 | 2.243247 | 2.507662 | Up | 2.47E-10 | 6.04E-10 |
| Crisp2       | 1440  | 3      | 18.5    | 0.074947 | 0.426115 | 2.507308 | Up | 0.000929 | 0.001583 |
| Klhl28       | 3036  | 177    | 1071.5  | 2.075788 | 11.77955 | 2.504553 | Up | 0        | 0        |
| Gem          | 2093  | 1056   | 6419.5  | 18.03979 | 102.3666 | 2.504491 | Up | 4.40E-13 | 1.49E-12 |
| LOC100910882 | 2725  | 3747.5 | 22705   | 49.10062 | 278.0326 | 2.501441 | Up | 0        | 0        |
| Celsr3       | 11868 | 13     | 79      | 0.039051 | 0.221104 | 2.501277 | Up | 2.60E-07 | 5.70E-07 |
| RGD1565712   | 3551  | 1737.5 | 10502.5 | 17.51039 | 98.82691 | 2.496693 | Up | 4.86E-12 | 1.34E-11 |
| Fam26d       | 948   | 12     | 73      | 0.455372 | 2.569976 | 2.496638 | Up | 4.81E-07 | 1.04E-06 |
| LOC500124    | 2014  | 12     | 72      | 0.211499 | 1.19357  | 2.496563 | Up | 4.81E-07 | 1.04E-06 |
| Dyrk3        | 2146  | 241    | 1461    | 4.025742 | 22.70169 | 2.495473 | Up | 2.12E-13 | 7.71E-13 |
| Zfp329       | 8686  | 260    | 1564.5  | 1.067146 | 6.015256 | 2.494868 | Up | 4.56E-13 | 1.54E-12 |
| LOC360919    | 2633  | 53     | 320.5   | 0.720068 | 4.05561  | 2.493715 | Up | 4.04E-14 | 1.62E-13 |
| Tmc5         | 3044  | 11     | 66.5    | 0.12912  | 0.725977 | 2.491207 | Up | 8.84E-07 | 1.88E-06 |

|              |       |        |        |          |          |          |    |          |          |
|--------------|-------|--------|--------|----------|----------|----------|----|----------|----------|
| LOC100910345 | 1528  | 3      | 18     | 0.07063  | 0.396834 | 2.490177 | Up | 0.000929 | 0.001583 |
| Syt15        | 4070  | 6.5    | 40     | 0.058063 | 0.325915 | 2.488791 | Up | 1.64E-05 | 3.23E-05 |
| Rab11fip4    | 3127  | 7      | 42     | 0.080287 | 0.450159 | 2.487203 | Up | 9.49E-06 | 1.90E-05 |
| Sim2         | 4150  | 5      | 30     | 0.042974 | 0.240917 | 2.486993 | Up | 4.05E-05 | 7.83E-05 |
| Atxn7l4      | 2565  | 208.5  | 1256   | 2.911267 | 16.3204  | 2.486958 | Up | 3.49E-13 | 1.21E-12 |
| Atl1         | 2585  | 163    | 979    | 2.256573 | 12.64715 | 2.486607 | Up | 2.37E-13 | 8.51E-13 |
| Loxl4        | 3789  | 49     | 294.5  | 0.463814 | 2.599147 | 2.486419 | Up | 3.91E-14 | 1.57E-13 |
| Ska2         | 1214  | 566.5  | 3394.5 | 16.64661 | 93.23408 | 2.485629 | Up | 8.82E-14 | 3.43E-13 |
| Slc16a7      | 2178  | 125    | 748    | 2.048936 | 11.47403 | 2.485425 | Up | 3.11E-15 | 1.31E-14 |
| Zfp418       | 2715  | 120    | 720.5  | 1.583269 | 8.862596 | 2.484823 | Up | 0        | 0        |
| RGD1564148   | 1317  | 3.5    | 21     | 0.094007 | 0.526213 | 2.484801 | Up | 0.00023  | 0.000417 |
| Dnah9        | 13766 | 3      | 18     | 0.007757 | 0.043394 | 2.484016 | Up | 0.000929 | 0.001583 |
| RGD1565796   | 1185  | 3      | 18     | 0.090107 | 0.504103 | 2.484016 | Up | 0.000929 | 0.001583 |
| Zfp36l1      | 2741  | 2947.5 | 17705  | 38.57016 | 215.6529 | 2.483154 | Up | 0        | 0        |
| Apoe         | 1191  | 71     | 426    | 2.130766 | 11.90636 | 2.482289 | Up | 0        | 0        |
| LOC100360358 | 1249  | 184.5  | 1103.5 | 5.273667 | 29.46829 | 2.482285 | Up | 3.15E-13 | 1.11E-12 |
| RGD1561551   | 903   | 31     | 185    | 1.226534 | 6.853002 | 2.482149 | Up | 3.08E-12 | 8.90E-12 |
| Obfc2a       | 2321  | 271.5  | 1623.5 | 4.176742 | 23.33237 | 2.481883 | Up | 8.22E-14 | 3.21E-13 |
| Osgin1       | 2355  | 86.5   | 520.5  | 1.319079 | 7.364409 | 2.481039 | Up | 0        | 0        |
| Cbll1        | 4045  | 718    | 4286.5 | 6.340577 | 35.38334 | 2.480384 | Up | 7.05E-13 | 2.28E-12 |
| Alx1         | 1760  | 40.5   | 242.5  | 0.824236 | 4.598893 | 2.480158 | Up | 1.16E-13 | 4.43E-13 |
| Slc25a47     | 1550  | 14.5   | 86.5   | 0.334561 | 1.861167 | 2.475865 | Up | 1.40E-07 | 3.11E-07 |
| Cpeb4        | 2830  | 784.5  | 4677.5 | 9.924785 | 55.17896 | 2.475011 | Up | 1.17E-13 | 4.46E-13 |
| LOC100365363 | 2025  | 174    | 1031.5 | 3.059982 | 16.99666 | 2.473657 | Up | 1.43E-13 | 5.34E-13 |
| Immp1l       | 920   | 260.5  | 1548   | 10.10187 | 56.09965 | 2.473369 | Up | 4.56E-13 | 1.54E-12 |

|              |      |       |        |          |          |          |    |          |          |
|--------------|------|-------|--------|----------|----------|----------|----|----------|----------|
| Zfp862       | 3546 | 153   | 909.5  | 1.542006 | 8.560845 | 2.472945 | Up | 0        | 0        |
| LOC314776    | 983  | 6     | 35.5   | 0.216079 | 1.198862 | 2.472035 | Up | 1.90E-05 | 3.75E-05 |
| Prpf39       | 4674 | 1390  | 8222.5 | 10.58759 | 58.71896 | 2.471453 | Up | 3.51E-12 | 1.00E-11 |
| Phf111       | 1351 | 4     | 23.5   | 0.105097 | 0.582413 | 2.470321 | Up | 0.000226 | 0.000409 |
| RGD1562552   | 2040 | 36    | 215    | 0.631469 | 3.497531 | 2.469553 | Up | 2.57E-13 | 9.17E-13 |
| Lrtm2        | 3681 | 33    | 196.5  | 0.321107 | 1.778228 | 2.469316 | Up | 1.01E-12 | 3.18E-12 |
| RGD1563270   | 876  | 6     | 35     | 0.241163 | 1.334975 | 2.468733 | Up | 1.90E-05 | 3.75E-05 |
| Usp13        | 5043 | 71.5  | 426    | 0.509327 | 2.814769 | 2.466352 | Up | 0        | 0        |
| RGD1564162   | 1609 | 4     | 23.5   | 0.088601 | 0.489584 | 2.466156 | Up | 0.000226 | 0.000409 |
| Cyp24a1      | 1545 | 3     | 18     | 0.070224 | 0.387807 | 2.465298 | Up | 0.000929 | 0.001583 |
| Zfp758       | 1757 | 132.5 | 781    | 2.686269 | 14.83147 | 2.464986 | Up | 1.14E-13 | 4.37E-13 |
| RGD1563533   | 7745 | 14.5  | 86.5   | 0.067326 | 0.37166  | 2.464756 | Up | 1.40E-07 | 3.11E-07 |
| RGD1563015   | 1698 | 40    | 236.5  | 0.84599  | 4.666332 | 2.463577 | Up | 1.16E-13 | 4.44E-13 |
| LOC100909889 | 943  | 405   | 2389.5 | 15.34083 | 84.59951 | 2.463273 | Up | 0        | 0        |
| Tekt2        | 1555 | 6     | 36     | 0.139545 | 0.769469 | 2.463129 | Up | 1.78E-05 | 3.51E-05 |
| Fam43a       | 2436 | 245.5 | 1452   | 3.609646 | 19.88647 | 2.461858 | Up | 3.55E-13 | 1.23E-12 |
| Gfer         | 1227 | 456   | 2694.5 | 13.30402 | 73.27328 | 2.461425 | Up | 1.95E-12 | 5.83E-12 |
| LOC100188933 | 726  | 45    | 264    | 2.204541 | 12.14066 | 2.461296 | Up | 2.49E-14 | 1.02E-13 |
| Rhbdl2       | 973  | 48.5  | 286.5  | 1.78394  | 9.821039 | 2.460809 | Up | 1.06E-13 | 4.07E-13 |
| LOC100364132 | 1989 | 14    | 82.5   | 0.250715 | 1.380071 | 2.460624 | Up | 1.40E-07 | 3.10E-07 |
| Ascl3        | 689  | 8     | 47     | 0.416312 | 2.290538 | 2.459948 | Up | 5.29E-06 | 1.08E-05 |
| Klf5         | 3232 | 350   | 2066.5 | 3.883202 | 21.34195 | 2.458374 | Up | 3.03E-13 | 1.07E-12 |
| RGD1566319   | 2723 | 708   | 4177.5 | 9.319487 | 51.18893 | 2.457509 | Up | 1.11E-12 | 3.47E-12 |
| Agt          | 1958 | 15    | 88.5   | 0.273252 | 1.500553 | 2.457188 | Up | 7.51E-08 | 1.68E-07 |
| Slc38a4      | 1946 | 7     | 41     | 0.128127 | 0.70296  | 2.455864 | Up | 9.64E-06 | 1.93E-05 |

|              |      |       |         |          |          |          |    |          |          |
|--------------|------|-------|---------|----------|----------|----------|----|----------|----------|
| LOC100359687 | 1082 | 153.5 | 900     | 5.060293 | 27.76177 | 2.455807 | Up | 0        | 0        |
| Aim1l        | 4629 | 7.5   | 44.5    | 0.058534 | 0.321055 | 2.455469 | Up | 9.35E-06 | 1.88E-05 |
| Nat2         | 1385 | 46    | 270.5   | 1.190125 | 6.525547 | 2.454986 | Up | 7.84E-14 | 3.07E-13 |
| Ets1         | 5031 | 4165  | 24456   | 29.61328 | 162.251  | 2.453911 | Up | 1.66E-11 | 4.31E-11 |
| LOC100910119 | 4720 | 38    | 222.5   | 0.288085 | 1.578139 | 2.453656 | Up | 1.45E-13 | 5.44E-13 |
| LOC100911152 | 1586 | 110.5 | 646.5   | 2.48749  | 13.60802 | 2.451695 | Up | 0        | 0        |
| Bcl3         | 1788 | 258.5 | 1513.5  | 5.168067 | 28.24429 | 2.450262 | Up | 2.94E-13 | 1.04E-12 |
| Plekhf1      | 1504 | 227.5 | 1335.5  | 5.416693 | 29.59158 | 2.449702 | Up | 3.55E-15 | 1.49E-14 |
| Strn3        | 4152 | 2882  | 16801.5 | 24.73867 | 135.0149 | 2.448278 | Up | 0        | 0        |
| Tcte4        | 924  | 23    | 134     | 0.890088 | 4.847655 | 2.445268 | Up | 4.68E-10 | 1.13E-09 |
| Slc38a6      | 2318 | 135   | 787.5   | 2.082774 | 11.34239 | 2.445147 | Up | 2.15E-13 | 7.77E-13 |
| Esm1         | 2160 | 38    | 219.5   | 0.623945 | 3.397572 | 2.445014 | Up | 1.45E-13 | 5.43E-13 |
| RGD1563955   | 2016 | 2.5   | 14.5    | 0.044232 | 0.240803 | 2.444697 | Up | 0.002465 | 0.004058 |
| Napb         | 897  | 24.5  | 143.5   | 0.978955 | 5.328603 | 2.444443 | Up | 2.47E-10 | 6.04E-10 |
| Blcap        | 2036 | 700.5 | 4082.5  | 12.30485 | 66.95619 | 2.44399  | Up | 0        | 0        |
| RGD1308138   | 1135 | 4.5   | 26.5    | 0.14263  | 0.775947 | 2.443685 | Up | 7.99E-05 | 0.00015  |
| Rhbdl1       | 1512 | 13    | 76      | 0.308798 | 1.678173 | 2.442157 | Up | 2.60E-07 | 5.69E-07 |
| Sobp         | 2595 | 2.5   | 15      | 0.034805 | 0.188825 | 2.439698 | Up | 0.001428 | 0.002399 |
| Chchd10      | 640  | 8     | 47      | 0.450874 | 2.442    | 2.437266 | Up | 5.29E-06 | 1.08E-05 |
| Acsm3        | 2585 | 19    | 109.5   | 0.261014 | 1.413387 | 2.436959 | Up | 6.02E-09 | 1.41E-08 |
| Zfp748       | 4998 | 121   | 701.5   | 0.86458  | 4.680912 | 2.436719 | Up | 0        | 0        |
| Prr16        | 3138 | 13    | 76      | 0.14879  | 0.805448 | 2.436517 | Up | 2.60E-07 | 5.69E-07 |
| Abcb4        | 3910 | 983   | 5706    | 8.997609 | 48.6795  | 2.435701 | Up | 3.73E-13 | 1.29E-12 |
| Olr373       | 951  | 2.5   | 14.5    | 0.094369 | 0.510472 | 2.435449 | Up | 0.002465 | 0.004057 |
| Zfp709l1     | 2600 | 63.5  | 365.5   | 0.869195 | 4.699473 | 2.434748 | Up | 0        | 0        |



|              |       |        |        |          |          |          |    |          |          |
|--------------|-------|--------|--------|----------|----------|----------|----|----------|----------|
| Osgin2       | 2666  | 421    | 2430   | 5.634129 | 30.42493 | 2.432989 | Up | 4.13E-13 | 1.41E-12 |
| Tcp1112      | 2293  | 178.5  | 1028.5 | 2.77619  | 14.97038 | 2.430933 | Up | 1.14E-13 | 4.37E-13 |
| Mettl19      | 3136  | 207.5  | 1197.5 | 2.365204 | 12.74795 | 2.430228 | Up | 1.16E-13 | 4.44E-13 |
| Hspb9        | 646   | 5      | 29     | 0.277848 | 1.497396 | 2.430089 | Up | 5.00E-05 | 9.55E-05 |
| Dnmt3b       | 4289  | 31.5   | 182.5  | 0.262738 | 1.415072 | 2.429176 | Up | 3.08E-12 | 8.91E-12 |
| LOC100909952 | 635   | 3      | 17.5   | 0.169958 | 0.915148 | 2.42883  | Up | 0.001563 | 0.002615 |
| Osr1         | 1726  | 35     | 203    | 0.727609 | 3.917858 | 2.428829 | Up | 3.77E-13 | 1.30E-12 |
| LOC100361923 | 3454  | 3.5    | 20.5   | 0.036343 | 0.19568  | 2.428756 | Up | 0.000351 | 0.000627 |
| Napsa        | 1434  | 4.5    | 25.5   | 0.111291 | 0.598406 | 2.42679  | Up | 0.000105 | 0.000196 |
| Prl8a4       | 914   | 4.5    | 26     | 0.175235 | 0.941856 | 2.42622  | Up | 7.99E-05 | 0.00015  |
| Aoc2-ps1     | 1459  | 29.5   | 170    | 0.72253  | 3.882767 | 2.425955 | Up | 1.04E-11 | 2.73E-11 |
| LOC681383    | 921   | 2.5    | 14.5   | 0.098688 | 0.530031 | 2.425131 | Up | 0.002465 | 0.004058 |
| Cadps        | 4926  | 6.5    | 37.5   | 0.047275 | 0.253889 | 2.42504  | Up | 1.71E-05 | 3.38E-05 |
| Gng3         | 1153  | 13.5   | 77.5   | 0.41723  | 2.239833 | 2.424475 | Up | 2.60E-07 | 5.69E-07 |
| LOC686013    | 1077  | 3.5    | 20     | 0.117086 | 0.628353 | 2.424009 | Up | 0.000351 | 0.000627 |
| Cks2         | 640   | 1648   | 9442.5 | 91.81748 | 492.4221 | 2.423055 | Up | 8.75E-12 | 2.31E-11 |
| Rhbdf2       | 3408  | 9      | 52     | 0.095003 | 0.509423 | 2.422823 | Up | 2.93E-06 | 6.07E-06 |
| Eppk1-ps1    | 10275 | 12     | 69     | 0.042014 | 0.225079 | 2.421496 | Up | 4.81E-07 | 1.04E-06 |
| Zfp317       | 4025  | 715.5  | 4089   | 6.335397 | 33.91276 | 2.420321 | Up | 0        | 0        |
| Epha2        | 3911  | 3822.5 | 21940  | 34.99162 | 187.296  | 2.420239 | Up | 2.87E-12 | 8.35E-12 |
| LOC367516    | 723   | 3      | 17     | 0.147685 | 0.790008 | 2.419344 | Up | 0.001563 | 0.002613 |
| Nipal4       | 3265  | 9.5    | 54     | 0.103853 | 0.555494 | 2.419227 | Up | 2.93E-06 | 6.06E-06 |
| Spag6l       | 1736  | 4      | 23     | 0.08245  | 0.440781 | 2.418475 | Up | 0.000226 | 0.000409 |
| Il1r1        | 1773  | 616.5  | 3536   | 12.45161 | 66.56247 | 2.418377 | Up | 5.19E-13 | 1.74E-12 |
| Vgf          | 2636  | 68.5   | 394    | 0.932377 | 4.978681 | 2.416778 | Up | 0        | 0        |

|              |      |        |         |          |          |          |    |          |          |
|--------------|------|--------|---------|----------|----------|----------|----|----------|----------|
| LOC100909649 | 2013 | 61     | 348     | 1.079498 | 5.762399 | 2.41631  | Up | 3.49E-14 | 1.41E-13 |
| Map3k13      | 3451 | 30     | 172.5   | 0.312065 | 1.665075 | 2.415667 | Up | 5.60E-12 | 1.52E-11 |
| Zfp763       | 3382 | 66     | 377     | 0.697634 | 3.718252 | 2.414081 | Up | 0        | 0        |
| Prpf38b      | 2993 | 2390   | 13657.5 | 28.57762 | 152.3124 | 2.414076 | Up | 0        | 0        |
| Siglech      | 2136 | 21     | 119.5   | 0.350996 | 1.869323 | 2.412989 | Up | 1.68E-09 | 4.01E-09 |
| RGD1561459   | 876  | 6      | 34      | 0.243781 | 1.29789  | 2.412508 | Up | 2.10E-05 | 4.14E-05 |
| LOC100911546 | 1971 | 16.5   | 93.5    | 0.298828 | 1.59042  | 2.412021 | Up | 4.01E-08 | 9.10E-08 |
| Rev1         | 4092 | 1112   | 6338    | 9.711473 | 51.6665  | 2.411467 | Up | 4.84E-12 | 1.33E-11 |
| Zfat         | 4444 | 219    | 1247.5  | 1.763266 | 9.372704 | 2.410215 | Up | 3.38E-13 | 1.18E-12 |
| Ptbp2        | 1842 | 575.5  | 3277.5  | 11.16255 | 59.33068 | 2.410111 | Up | 3.54E-13 | 1.23E-12 |
| Cenpk        | 1641 | 539    | 3064.5  | 11.74526 | 62.34493 | 2.408194 | Up | 4.59E-13 | 1.55E-12 |
| Slc16a12     | 1876 | 3      | 17      | 0.056917 | 0.302066 | 2.407933 | Up | 0.001563 | 0.002614 |
| Mgat4a       | 7181 | 57     | 325     | 0.284832 | 1.509402 | 2.405794 | Up | 5.37E-14 | 2.13E-13 |
| Adams15      | 6064 | 58.5   | 332.5   | 0.345914 | 1.831772 | 2.404756 | Up | 1.35E-14 | 5.59E-14 |
| Wnt7a        | 3150 | 52     | 295.5   | 0.590343 | 3.125572 | 2.404494 | Up | 5.13E-14 | 2.04E-13 |
| Capn13       | 2659 | 7      | 39      | 0.092908 | 0.491382 | 2.402974 | Up | 1.03E-05 | 2.07E-05 |
| Cyb5d2       | 1481 | 38     | 215.5   | 0.920849 | 4.869351 | 2.402693 | Up | 1.45E-13 | 5.43E-13 |
| Mefv         | 3231 | 6.5    | 37      | 0.072254 | 0.382053 | 2.402631 | Up | 1.71E-05 | 3.38E-05 |
| Rgs16        | 600  | 91.5   | 519     | 5.465067 | 28.87959 | 2.401739 | Up | 0        | 0        |
| Hcn1         | 2807 | 6      | 34      | 0.076079 | 0.401835 | 2.401042 | Up | 2.10E-05 | 4.14E-05 |
| MGC105649    | 1174 | 136    | 766     | 4.12864  | 21.8     | 2.40059  | Up | 1.95E-13 | 7.10E-13 |
| Cyb5rl       | 1031 | 13.5   | 76.5    | 0.470495 | 2.483842 | 2.400321 | Up | 2.60E-07 | 5.69E-07 |
| RGD1562846   | 1469 | 1148   | 6490.5  | 27.96988 | 147.5143 | 2.398909 | Up | 3.66E-12 | 1.04E-11 |
| LOC100909638 | 951  | 3      | 17      | 0.113484 | 0.597766 | 2.397095 | Up | 0.001563 | 0.002614 |
| LOC100912411 | 1813 | 6336.5 | 35581.5 | 124.559  | 655.966  | 2.396791 | Up | 3.71E-12 | 1.05E-11 |

|              |      |        |         |          |          |          |    |          |          |
|--------------|------|--------|---------|----------|----------|----------|----|----------|----------|
| Lysmd3       | 1186 | 444    | 2499.5  | 13.37094 | 70.37613 | 2.395985 | Up | 1.07E-12 | 3.36E-12 |
| Ptp4a1       | 2484 | 2629.5 | 14777.5 | 37.7226  | 198.519  | 2.395776 | Up | 0        | 0        |
| Akr1d1       | 3189 | 3      | 17      | 0.033842 | 0.177979 | 2.394809 | Up | 0.001563 | 0.002614 |
| Tmem161b     | 2651 | 541.5  | 3038    | 7.280297 | 38.2675  | 2.39405  | Up | 0        | 0        |
| RGD1304580   | 1169 | 5      | 28      | 0.151579 | 0.796604 | 2.393794 | Up | 6.62E-05 | 0.000126 |
| Zrsr1        | 1755 | 207    | 1167.5  | 4.226468 | 22.18237 | 2.391889 | Up | 1.16E-13 | 4.44E-13 |
| LOC100912096 | 1643 | 47     | 263     | 1.016293 | 5.33392  | 2.391879 | Up | 0        | 0        |
| Vom2r34      | 2370 | 6      | 33.5    | 0.089623 | 0.470214 | 2.391383 | Up | 2.45E-05 | 4.82E-05 |
| Otud3        | 1528 | 492    | 2763    | 11.50119 | 60.33623 | 2.391242 | Up | 0        | 0        |
| LOC100913024 | 619  | 3      | 17      | 0.174351 | 0.914016 | 2.390226 | Up | 0.001563 | 0.002615 |
| Nvl          | 2901 | 436.5  | 2444.5  | 5.369411 | 28.12113 | 2.388819 | Up | 4.26E-13 | 1.45E-12 |
| Acn9         | 336  | 39     | 218     | 4.141464 | 21.66704 | 2.387289 | Up | 1.32E-13 | 4.99E-13 |
| LOC681138    | 476  | 17.5   | 97      | 1.296887 | 6.784707 | 2.387233 | Up | 2.14E-08 | 4.89E-08 |
| LOC100125366 | 837  | 2.5    | 14      | 0.107222 | 0.560592 | 2.38635  | Up | 0.002465 | 0.004059 |
| LOC100912748 | 1098 | 10     | 56      | 0.324328 | 1.694591 | 2.385412 | Up | 1.62E-06 | 3.40E-06 |
| Inhbb        | 3131 | 8      | 44.5    | 0.091063 | 0.475236 | 2.383703 | Up | 5.48E-06 | 1.11E-05 |
| LOC100911927 | 546  | 4.5    | 25      | 0.296492 | 1.543536 | 2.380173 | Up | 0.000105 | 0.000196 |
| Fgd3         | 2789 | 3      | 17      | 0.038696 | 0.201246 | 2.378705 | Up | 0.001563 | 0.002614 |
| Cfp          | 1505 | 43.5   | 242.5   | 1.032171 | 5.362559 | 2.37724  | Up | 1.18E-13 | 4.48E-13 |
| LOC100364135 | 1944 | 25     | 138     | 0.458995 | 2.382552 | 2.375956 | Up | 1.30E-10 | 3.22E-10 |
| Lrrc51       | 915  | 14.5   | 81.5    | 0.568623 | 2.950682 | 2.375503 | Up | 1.40E-07 | 3.10E-07 |
| Pappa        | 4933 | 55     | 306     | 0.39838  | 2.067011 | 2.375327 | Up | 0        | 0        |
| Smoc1        | 1359 | 10     | 55.5    | 0.26415  | 1.369771 | 2.374508 | Up | 1.62E-06 | 3.41E-06 |
| Ankrd32      | 3750 | 654.5  | 3625.5  | 6.225564 | 32.24945 | 2.372998 | Up | 1.65E-12 | 5.01E-12 |
| Ythdc1       | 2968 | 2057   | 11396.5 | 24.74735 | 128.1925 | 2.372966 | Up | 0        | 0        |

|              |      |        |         |          |          |          |    |          |          |
|--------------|------|--------|---------|----------|----------|----------|----|----------|----------|
| Megf11       | 3664 | 4      | 22.5    | 0.039378 | 0.203917 | 2.372535 | Up | 0.000357 | 0.000637 |
| Tmprss5      | 2385 | 16     | 88.5    | 0.238613 | 1.234919 | 2.371674 | Up | 4.01E-08 | 9.09E-08 |
| LOC100364350 | 4008 | 5      | 28      | 0.045069 | 0.233241 | 2.371616 | Up | 6.62E-05 | 0.000126 |
| LOC100360611 | 483  | 3      | 16.5    | 0.219882 | 1.137748 | 2.371382 | Up | 0.00265  | 0.004349 |
| LOC100365697 | 2464 | 2320.5 | 12814.5 | 33.55137 | 173.5411 | 2.370834 | Up | 0        | 0        |
| Rbm7         | 1411 | 783.5  | 4341.5  | 19.87073 | 102.6853 | 2.369513 | Up | 0        | 0        |
| Rnf185       | 2786 | 652    | 3616.5  | 8.384956 | 43.32432 | 2.369302 | Up | 1.68E-12 | 5.10E-12 |
| LOC100911168 | 1167 | 8      | 44.5    | 0.246283 | 1.271948 | 2.368648 | Up | 5.48E-06 | 1.11E-05 |
| L1cam        | 5093 | 49.5   | 274.5   | 0.348742 | 1.799731 | 2.367548 | Up | 3.91E-14 | 1.57E-13 |
| Fbxo36       | 901  | 3.5    | 19      | 0.138684 | 0.715039 | 2.366216 | Up | 0.000562 | 0.000989 |
| Nrip3        | 3859 | 4      | 22      | 0.037091 | 0.190803 | 2.362958 | Up | 0.000357 | 0.000637 |
| Dnai1        | 2441 | 8      | 44      | 0.117509 | 0.603654 | 2.360952 | Up | 5.48E-06 | 1.11E-05 |
| Slc7a13      | 1928 | 68     | 371     | 1.253736 | 6.425004 | 2.357463 | Up | 0        | 0        |
| Htr5b        | 2223 | 98     | 539.5   | 1.581616 | 8.10285  | 2.35703  | Up | 0        | 0        |
| LOC100912573 | 3311 | 5      | 27      | 0.053517 | 0.27416  | 2.356941 | Up | 9.38E-05 | 0.000175 |
| Csf1         | 3975 | 9688.5 | 53266   | 87.35167 | 447.2459 | 2.356161 | Up | 1.88E-12 | 5.64E-12 |
| Slc9a8       | 2160 | 260    | 1422    | 4.293702 | 21.98382 | 2.356148 | Up | 4.56E-13 | 1.54E-12 |
| Atp1a4       | 3447 | 4      | 22      | 0.041857 | 0.214131 | 2.354966 | Up | 0.000357 | 0.000637 |
| Zfp322a      | 3136 | 316.5  | 1723.5  | 3.593402 | 18.32236 | 2.350183 | Up | 3.85E-13 | 1.32E-12 |
| LOC690276    | 971  | 14.5   | 78.5    | 0.532286 | 2.713507 | 2.349885 | Up | 1.40E-07 | 3.10E-07 |
| RGD1311648   | 2738 | 1385.5 | 7543.5  | 18.07616 | 92.05792 | 2.348454 | Up | 7.00E-12 | 1.87E-11 |
| RGD1306474   | 1265 | 4      | 22      | 0.114055 | 0.58064  | 2.347912 | Up | 0.000357 | 0.000637 |
| LOC100910223 | 1942 | 9      | 49      | 0.165538 | 0.842407 | 2.347351 | Up | 2.97E-06 | 6.16E-06 |
| LOC499602    | 2350 | 103    | 559     | 1.561539 | 7.946012 | 2.347262 | Up | 0        | 0        |
| Sntg1        | 1560 | 11     | 59      | 0.249009 | 1.266745 | 2.346854 | Up | 8.87E-07 | 1.89E-06 |

|              |      |        |        |          |          |          |    |          |          |
|--------------|------|--------|--------|----------|----------|----------|----|----------|----------|
| Gas2         | 2056 | 17     | 92     | 0.293363 | 1.491336 | 2.345847 | Up | 2.14E-08 | 4.89E-08 |
| Zic4         | 1985 | 7.5    | 41     | 0.135923 | 0.690962 | 2.345813 | Up | 9.64E-06 | 1.93E-05 |
| Xkrx         | 1817 | 3.5    | 19     | 0.069085 | 0.3511   | 2.345433 | Up | 0.000562 | 0.000989 |
| Golga1       | 4483 | 1441.5 | 7847.5 | 11.48307 | 58.35143 | 2.34526  | Up | 3.21E-13 | 1.12E-12 |
| Cd3eap       | 2040 | 1821.5 | 9926.5 | 31.93778 | 162.0637 | 2.343225 | Up | 3.23E-12 | 9.30E-12 |
| Greb1l       | 6307 | 3      | 16.5   | 0.01693  | 0.085846 | 2.342189 | Up | 0.00265  | 0.004347 |
| Tex15        | 8416 | 8      | 43.5   | 0.034014 | 0.172407 | 2.341596 | Up | 5.64E-06 | 1.15E-05 |
| Hp           | 1239 | 46.5   | 251    | 1.338095 | 6.780299 | 2.341169 | Up | 7.84E-14 | 3.07E-13 |
| Tmem35       | 2006 | 38.5   | 206.5  | 0.678048 | 3.435307 | 2.340979 | Up | 1.45E-13 | 5.43E-13 |
| RGD1562079   | 986  | 212.5  | 1156   | 7.709868 | 39.05188 | 2.340614 | Up | 0        | 0        |
| LOC100361383 | 3155 | 5      | 27     | 0.056527 | 0.286004 | 2.339025 | Up | 9.38E-05 | 0.000175 |
| Cep44        | 1589 | 233    | 1256.5 | 5.218497 | 26.39181 | 2.338384 | Up | 0        | 0        |
| Ing4         | 1615 | 606    | 3288   | 13.43199 | 67.92584 | 2.338287 | Up | 6.55E-13 | 2.14E-12 |
| LOC100909998 | 1266 | 10.5   | 57.5   | 0.296554 | 1.499677 | 2.338285 | Up | 1.62E-06 | 3.40E-06 |
| Slfn1        | 1622 | 4      | 21.5   | 0.088245 | 0.446157 | 2.33797  | Up | 0.000579 | 0.001005 |
| LOC498265    | 2932 | 390    | 2109   | 4.750319 | 23.99287 | 2.336509 | Up | 1.18E-13 | 4.48E-13 |
| Gins2        | 4192 | 1395   | 7527.5 | 11.89032 | 60.02972 | 2.33589  | Up | 5.52E-12 | 1.50E-11 |
| Mtpap        | 2680 | 823    | 4447.5 | 10.97667 | 55.41683 | 2.335883 | Up | 4.79E-13 | 1.61E-12 |
| Suv39h2      | 4132 | 276.5  | 1493.5 | 2.387073 | 12.05047 | 2.335775 | Up | 7.04E-14 | 2.77E-13 |
| Rfx8         | 2001 | 73.5   | 398.5  | 1.316239 | 6.631681 | 2.332953 | Up | 0        | 0        |
| Slc17a9      | 2276 | 13     | 70.5   | 0.205142 | 1.032786 | 2.331849 | Up | 2.60E-07 | 5.69E-07 |
| Ppdc         | 2714 | 153    | 822.5  | 2.01282  | 10.13324 | 2.331805 | Up | 0        | 0        |
| Wdr38        | 1186 | 4.5    | 24     | 0.136496 | 0.687002 | 2.331451 | Up | 0.00015  | 0.000273 |
| Lipogenin    | 1265 | 6      | 32.5   | 0.170629 | 0.85812  | 2.330312 | Up | 3.05E-05 | 5.93E-05 |
| Zfp157       | 3225 | 224    | 1200.5 | 2.474563 | 12.43055 | 2.328644 | Up | 7.97E-14 | 3.12E-13 |

|              |      |       |        |          |          |          |    |          |          |
|--------------|------|-------|--------|----------|----------|----------|----|----------|----------|
| RGD1306576   | 797  | 152   | 813    | 6.796346 | 34.08078 | 2.326127 | Up | 1.08E-13 | 4.15E-13 |
| Arl5b        | 2827 | 345.5 | 1853.5 | 4.36217  | 21.86831 | 2.325724 | Up | 9.33E-13 | 2.96E-12 |
| LOC100365935 | 2893 | 174.5 | 938    | 2.159464 | 10.82255 | 2.325295 | Up | 1.43E-13 | 5.33E-13 |
| Adcyap1r1    | 6235 | 6     | 32     | 0.034251 | 0.17164  | 2.325188 | Up | 3.05E-05 | 5.93E-05 |
| LOC367196    | 1950 | 266.5 | 1429.5 | 4.880524 | 24.4481  | 2.324614 | Up | 2.19E-13 | 7.92E-13 |
| Nrcam        | 7556 | 18    | 97     | 0.085243 | 0.426578 | 2.32315  | Up | 1.14E-08 | 2.63E-08 |
| Slc10a2      | 377  | 351   | 1876.5 | 33.25154 | 166.3568 | 2.322788 | Up | 9.48E-14 | 3.68E-13 |
| Atp6v1e2     | 992  | 3     | 16     | 0.107637 | 0.538497 | 2.322759 | Up | 0.00265  | 0.004349 |
| Dus4l        | 1821 | 138.5 | 742    | 2.723931 | 13.62335 | 2.322319 | Up | 1.83E-13 | 6.72E-13 |
| LOC100911038 | 540  | 14    | 74.5   | 0.921342 | 4.601977 | 2.320445 | Up | 1.40E-07 | 3.10E-07 |
| RGD1564214   | 1104 | 49.5  | 265.5  | 1.610904 | 8.043432 | 2.319941 | Up | 3.91E-14 | 1.57E-13 |
| Klf15        | 2458 | 22    | 116    | 0.31724  | 1.581477 | 2.317625 | Up | 8.87E-10 | 2.13E-09 |
| RGD1565170   | 495  | 4.5   | 24     | 0.325881 | 1.624209 | 2.317319 | Up | 0.00015  | 0.000273 |
| Slc17a4      | 2461 | 3     | 16     | 0.043853 | 0.218525 | 2.317036 | Up | 0.00265  | 0.004348 |
| LOC100302465 | 2943 | 240   | 1280.5 | 2.914985 | 14.52523 | 2.317001 | Up | 0        | 0        |
| Mrgpre       | 930  | 3     | 16     | 0.11543  | 0.574397 | 2.315032 | Up | 0.00265  | 0.004349 |
| Rab12a       | 1830 | 161.5 | 859    | 3.150869 | 15.65452 | 2.312758 | Up | 0        | 0        |
| Jph3         | 3606 | 14    | 75     | 0.139084 | 0.690907 | 2.31253  | Up | 1.40E-07 | 3.10E-07 |
| Guca1b       | 1677 | 14.5  | 77     | 0.308541 | 1.53243  | 2.312287 | Up | 1.40E-07 | 3.10E-07 |
| Zfp672       | 2947 | 293   | 1563.5 | 3.564686 | 17.70371 | 2.312205 | Up | 5.51E-13 | 1.83E-12 |
| LOC690136    | 4032 | 181   | 956    | 1.597096 | 7.92036  | 2.310115 | Up | 1.41E-13 | 5.30E-13 |
| Osmr         | 2889 | 16    | 85     | 0.198375 | 0.982616 | 2.308399 | Up | 4.01E-08 | 9.09E-08 |
| LOC687056    | 1308 | 15.5  | 81.5   | 0.418995 | 2.074446 | 2.307721 | Up | 7.51E-08 | 1.68E-07 |
| Ccnl2        | 1171 | 482.5 | 2542.5 | 14.63569 | 72.42905 | 2.307078 | Up | 1.31E-14 | 5.42E-14 |
| Cwc25        | 3195 | 448   | 2371   | 5.009236 | 24.78724 | 2.306935 | Up | 0        | 0        |

|              |      |        |         |          |          |          |    |          |          |
|--------------|------|--------|---------|----------|----------|----------|----|----------|----------|
| Nedd9        | 4393 | 2052.5 | 10900.5 | 16.73348 | 82.8005  | 2.306902 | Up | 0        | 0        |
| Gtppb8       | 1225 | 161.5  | 854.5   | 4.708416 | 23.27321 | 2.305356 | Up | 0        | 0        |
| Mtf2         | 2575 | 593.5  | 3138    | 8.233596 | 40.69038 | 2.305093 | Up | 1.48E-12 | 4.54E-12 |
| Fbxo28       | 1523 | 583.5  | 3081    | 13.66748 | 67.47883 | 2.303687 | Up | 5.08E-13 | 1.70E-12 |
| Serpib5      | 2576 | 8.5    | 45.5    | 0.11863  | 0.585695 | 2.303679 | Up | 5.38E-06 | 1.09E-05 |
| Zbtb10       | 3849 | 312    | 1647.5  | 2.895226 | 14.28611 | 2.302865 | Up | 1.77E-13 | 6.50E-13 |
| Ccr7         | 1215 | 8      | 42.5    | 0.234666 | 1.157851 | 2.30277  | Up | 5.93E-06 | 1.20E-05 |
| Zscan12      | 2344 | 186    | 977     | 2.826978 | 13.92475 | 2.300319 | Up | 6.10E-13 | 2.00E-12 |
| Hoxa5        | 1971 | 37.5   | 198     | 0.679207 | 3.34525  | 2.30019  | Up | 1.86E-13 | 6.81E-13 |
| Slc9b1       | 2254 | 143    | 751     | 2.259757 | 11.1264  | 2.299747 | Up | 0        | 0        |
| Lat          | 1188 | 7      | 36.5    | 0.208913 | 1.028425 | 2.299461 | Up | 1.46E-05 | 2.90E-05 |
| Fam13c       | 3535 | 11     | 58      | 0.111835 | 0.549826 | 2.297607 | Up | 8.89E-07 | 1.89E-06 |
| Rasgrp1      | 3624 | 3      | 16      | 0.02978  | 0.14641  | 2.29759  | Up | 0.00265  | 0.004347 |
| Gytl1b       | 2455 | 7      | 37      | 0.102263 | 0.502449 | 2.29669  | Up | 1.24E-05 | 2.48E-05 |
| Cmah         | 2221 | 10     | 52.5    | 0.161113 | 0.791426 | 2.296381 | Up | 1.65E-06 | 3.46E-06 |
| LOC100909521 | 1851 | 52     | 274.5   | 1.007734 | 4.948044 | 2.295743 | Up | 5.13E-14 | 2.04E-13 |
| LOC100363112 | 670  | 21.5   | 112     | 1.140137 | 5.589139 | 2.293419 | Up | 1.68E-09 | 4.01E-09 |
| Zbtb6        | 2418 | 419.5  | 2200.5  | 6.1956   | 30.36523 | 2.293104 | Up | 0        | 0        |
| Gpr68        | 3115 | 18     | 94      | 0.206037 | 1.005188 | 2.286492 | Up | 1.14E-08 | 2.63E-08 |
| LOC100912790 | 701  | 17     | 89      | 0.8686   | 4.234987 | 2.285594 | Up | 2.14E-08 | 4.89E-08 |
| Cst6         | 836  | 15.5   | 81.5    | 0.66859  | 3.258583 | 2.285052 | Up | 7.51E-08 | 1.68E-07 |
| Slc27a3      | 2274 | 13     | 68      | 0.205574 | 1.001541 | 2.28449  | Up | 2.61E-07 | 5.69E-07 |
| Senp8        | 1007 | 71     | 370     | 2.526935 | 12.30211 | 2.283445 | Up | 0        | 0        |
| LOC500475    | 2155 | 17     | 87.5    | 0.278821 | 1.355822 | 2.281754 | Up | 2.14E-08 | 4.89E-08 |
| LOC100363065 | 3068 | 156    | 812     | 1.820982 | 8.836112 | 2.278695 | Up | 1.64E-13 | 6.07E-13 |

|              |      |        |        |          |          |          |    |          |          |
|--------------|------|--------|--------|----------|----------|----------|----|----------|----------|
| LOC100911686 | 707  | 5      | 26     | 0.252253 | 1.223984 | 2.278643 | Up | 0.000141 | 0.000257 |
| RGD1560191   | 3737 | 403    | 2093   | 3.855967 | 18.70032 | 2.277898 | Up | 0        | 0        |
| Lats2        | 4958 | 2429.5 | 12611  | 17.52274 | 84.89868 | 2.276514 | Up | 0        | 0        |
| Camk2a       | 1510 | 18     | 94.5   | 0.428074 | 2.073644 | 2.276236 | Up | 1.14E-08 | 2.63E-08 |
| Irak2        | 2977 | 121    | 628.5  | 1.453252 | 7.035727 | 2.275415 | Up | 0        | 0        |
| LOC687866    | 3108 | 2.5    | 13     | 0.028691 | 0.13878  | 2.274134 | Up | 0.004296 | 0.006927 |
| Actr6        | 1707 | 533.5  | 2755   | 11.14208 | 53.87649 | 2.273637 | Up | 0        | 0        |
| Dennd2c      | 4980 | 54.5   | 281.5  | 0.390855 | 1.889305 | 2.273149 | Up | 3.66E-14 | 1.48E-13 |
| LOC100362641 | 3123 | 173    | 892.5  | 1.978005 | 9.554781 | 2.272177 | Up | 3.79E-13 | 1.30E-12 |
| LOC100912109 | 375  | 7      | 36.5   | 0.675599 | 3.25805  | 2.269769 | Up | 1.46E-05 | 2.90E-05 |
| Tnfrsf15     | 759  | 29     | 149.5  | 1.364945 | 6.579155 | 2.269059 | Up | 1.04E-11 | 2.73E-11 |
| Slc26a9      | 3580 | 17     | 88     | 0.170401 | 0.821184 | 2.268773 | Up | 2.14E-08 | 4.89E-08 |
| LOC691960    | 2020 | 8      | 41     | 0.140012 | 0.674534 | 2.268336 | Up | 6.40E-06 | 1.30E-05 |
| RGD1305938   | 4512 | 584.5  | 3009   | 4.618898 | 22.23455 | 2.267183 | Up | 5.51E-13 | 1.83E-12 |
| Rad9b        | 1783 | 78     | 400.5  | 1.560245 | 7.508227 | 2.266699 | Up | 0        | 0        |
| Traf2        | 2098 | 773.5  | 3989.5 | 13.19395 | 63.49196 | 2.266697 | Up | 9.31E-13 | 2.96E-12 |
| Cntf         | 1101 | 54     | 276    | 1.743578 | 8.383343 | 2.265475 | Up | 3.66E-14 | 1.48E-13 |
| Txk          | 2308 | 19.5   | 100    | 0.302452 | 1.453588 | 2.264839 | Up | 6.02E-09 | 1.41E-08 |
| Ica1l        | 1308 | 2.5    | 13     | 0.069489 | 0.33389  | 2.264517 | Up | 0.004296 | 0.006926 |
| Rasl11b      | 1840 | 281.5  | 1451   | 5.482081 | 26.33036 | 2.263932 | Up | 0        | 0        |
| Cdc42bpg     | 5967 | 6      | 31     | 0.035981 | 0.172698 | 2.262942 | Up | 4.05E-05 | 7.83E-05 |
| LOC688416    | 465  | 2.5    | 13     | 0.191766 | 0.91791  | 2.259003 | Up | 0.004296 | 0.006931 |
| LOC691141    | 1301 | 6      | 31     | 0.165908 | 0.792768 | 2.256515 | Up | 4.05E-05 | 7.83E-05 |
| Fam133b      | 2009 | 1583   | 8083   | 28.11734 | 134.3436 | 2.256395 | Up | 4.71E-12 | 1.30E-11 |
| Mtcp1        | 538  | 69     | 353.5  | 4.598892 | 21.97154 | 2.256278 | Up | 0        | 0        |



|              |      |        |        |          |          |          |    |          |          |
|--------------|------|--------|--------|----------|----------|----------|----|----------|----------|
| RGD1566244   | 921  | 2.5    | 13     | 0.09682  | 0.462463 | 2.255958 | Up | 0.004296 | 0.00693  |
| Lce1m        | 829  | 2.5    | 13     | 0.108257 | 0.517043 | 2.255827 | Up | 0.004296 | 0.006928 |
| LOC100912922 | 524  | 7038.5 | 36117  | 480.8097 | 2294.079 | 2.254377 | Up | 3.35E-11 | 8.47E-11 |
| Tgds         | 1797 | 466    | 2373   | 9.25669  | 44.10696 | 2.252438 | Up | 4.74E-13 | 1.60E-12 |
| LOC690857    | 1092 | 48.5   | 249    | 1.600039 | 7.623642 | 2.252374 | Up | 1.06E-13 | 4.07E-13 |
| Zfp638       | 6336 | 1971.5 | 10037  | 11.10643 | 52.87772 | 2.251265 | Up | 9.95E-13 | 3.14E-12 |
| Vgll3        | 1176 | 315.5  | 1612.5 | 9.63146  | 45.83613 | 2.250659 | Up | 4.99E-13 | 1.67E-12 |
| Lrrc39       | 2875 | 54.5   | 277.5  | 0.680021 | 3.235858 | 2.250497 | Up | 3.66E-14 | 1.48E-13 |
| Gipr         | 2698 | 8      | 41     | 0.106528 | 0.50636  | 2.24893  | Up | 6.40E-06 | 1.30E-05 |
| LOC365791    | 4770 | 9.5    | 48     | 0.070846 | 0.336723 | 2.24881  | Up | 3.01E-06 | 6.23E-06 |
| Styk1        | 1290 | 30.5   | 155    | 0.842259 | 4.002524 | 2.248574 | Up | 5.60E-12 | 1.52E-11 |
| Exog         | 4085 | 269.5  | 1372   | 2.360379 | 11.21626 | 2.248501 | Up | 5.77E-14 | 2.28E-13 |
| Nmb          | 660  | 5.5    | 28     | 0.29689  | 1.409592 | 2.247275 | Up | 6.62E-05 | 0.000126 |
| LOC365218    | 1254 | 6.5    | 34     | 0.187994 | 0.892305 | 2.246848 | Up | 2.10E-05 | 4.14E-05 |
| Rasgrf1      | 1395 | 52     | 265.5  | 1.340432 | 6.357168 | 2.245686 | Up | 5.13E-14 | 2.04E-13 |
| LOC100361503 | 3102 | 243    | 1236   | 2.808127 | 13.30799 | 2.244613 | Up | 0        | 0        |
| Map4k1       | 2699 | 44.5   | 226    | 0.588811 | 2.7903   | 2.244544 | Up | 8.13E-14 | 3.18E-13 |
| RGD1309170   | 1580 | 3      | 15     | 0.066854 | 0.316394 | 2.242634 | Up | 0.004499 | 0.007237 |
| Fam221a      | 1427 | 9      | 45.5   | 0.224477 | 1.061703 | 2.24174  | Up | 3.36E-06 | 6.93E-06 |
| Gas5         | 429  | 997.5  | 5021   | 82.62149 | 390.6972 | 2.241462 | Up | 0        | 0        |
| Rad18        | 1737 | 765    | 3866.5 | 15.73437 | 74.28443 | 2.239141 | Up | 0        | 0        |
| LOC100912030 | 972  | 239    | 1210.5 | 8.799142 | 41.53219 | 2.238795 | Up | 5.84E-13 | 1.93E-12 |
| Zfp868       | 2262 | 366    | 1844.5 | 5.776678 | 27.22477 | 2.236608 | Up | 0        | 0        |
| Il34         | 1549 | 7.5    | 38     | 0.174922 | 0.823692 | 2.235391 | Up | 1.11E-05 | 2.22E-05 |
| Dnajb4       | 1508 | 798.5  | 4025.5 | 18.93672 | 89.11271 | 2.234445 | Up | 1.74E-12 | 5.25E-12 |

|              |      |       |        |          |          |          |    |          |          |
|--------------|------|-------|--------|----------|----------|----------|----|----------|----------|
| Ankrd16      | 1378 | 48    | 242.5  | 1.248937 | 5.873768 | 2.233585 | Up | 1.06E-13 | 4.07E-13 |
| LOC100909526 | 2556 | 55    | 275.5  | 0.763926 | 3.591399 | 2.233041 | Up | 0        | 0        |
| RGD1565744   | 1424 | 308.5 | 1557   | 7.756827 | 36.46528 | 2.232985 | Up | 0        | 0        |
| Ankrd55      | 2977 | 31    | 157    | 0.373195 | 1.753184 | 2.231977 | Up | 3.08E-12 | 8.90E-12 |
| LOC685925    | 1672 | 121.5 | 609    | 2.58673  | 12.14825 | 2.231547 | Up | 0        | 0        |
| RGD1359529   | 1515 | 652   | 3283   | 15.39372 | 72.28376 | 2.231329 | Up | 1.68E-12 | 5.10E-12 |
| Rnpc3        | 1818 | 561.5 | 2824.5 | 11.05139 | 51.8918  | 2.231279 | Up | 0        | 0        |
| Mmp1b        | 1383 | 5     | 25     | 0.129783 | 0.609379 | 2.23124  | Up | 0.00022  | 0.000398 |
| Alkbh4       | 1803 | 87.5  | 439.5  | 1.735455 | 8.147618 | 2.231064 | Up | 0        | 0        |
| Jam2         | 4225 | 11    | 55     | 0.092756 | 0.43526  | 2.230362 | Up | 9.06E-07 | 1.93E-06 |
| Ppm1d        | 2909 | 412   | 2069.5 | 5.062439 | 23.74608 | 2.229785 | Up | 2.14E-13 | 7.77E-13 |
| Itgb6        | 2818 | 75.5  | 380    | 0.959011 | 4.495099 | 2.228733 | Up | 0        | 0        |
| Scn2b        | 873  | 5     | 25.5   | 0.205601 | 0.962329 | 2.226684 | Up | 0.00022  | 0.000399 |
| LOC100911466 | 1816 | 85.5  | 427.5  | 1.681097 | 7.859753 | 2.225081 | Up | 0        | 0        |
| Ano7         | 2742 | 8     | 39.5   | 0.103564 | 0.484073 | 2.224705 | Up | 8.54E-06 | 1.72E-05 |
| RGD1559502   | 1490 | 62    | 311    | 1.488582 | 6.955972 | 2.224313 | Up | 0        | 0        |
| LOC499110    | 4857 | 263.5 | 1318   | 1.938523 | 9.056911 | 2.224061 | Up | 1.80E-13 | 6.60E-13 |
| Mtif2        | 2259 | 249   | 1242.5 | 3.926719 | 18.3354  | 2.223235 | Up | 1.13E-14 | 4.69E-14 |
| Rbm41        | 2732 | 229   | 1141.5 | 2.992053 | 13.96091 | 2.222185 | Up | 2.54E-13 | 9.10E-13 |
| LOC100911674 | 758  | 61.5  | 308    | 2.903635 | 13.54121 | 2.221425 | Up | 3.49E-14 | 1.41E-13 |
| LOC680222    | 1672 | 79    | 394.5  | 1.687971 | 7.866954 | 2.220515 | Up | 0        | 0        |
| Epc2         | 3686 | 978   | 4883.5 | 9.492903 | 44.19328 | 2.218906 | Up | 2.73E-12 | 7.98E-12 |
| Ccdc8        | 3408 | 9.5   | 46.5   | 0.098654 | 0.459107 | 2.218379 | Up | 3.18E-06 | 6.58E-06 |
| RGD1309708   | 1918 | 832   | 4143   | 15.50998 | 72.16453 | 2.218093 | Up | 0        | 0        |
| Lrrtm2       | 4715 | 18    | 90.5   | 0.136606 | 0.635579 | 2.218049 | Up | 1.14E-08 | 2.63E-08 |

|              |      |       |        |          |          |          |    |          |          |
|--------------|------|-------|--------|----------|----------|----------|----|----------|----------|
| Disc1        | 2475 | 8     | 40     | 0.1152   | 0.535948 | 2.217958 | Up | 7.20E-06 | 1.46E-05 |
| Zfp280d      | 4256 | 1129  | 5630   | 9.485977 | 44.12623 | 2.217768 | Up | 3.41E-12 | 9.77E-12 |
| Cd180        | 2566 | 3     | 15     | 0.042059 | 0.195519 | 2.216827 | Up | 0.004499 | 0.007236 |
| Zfp202       | 3481 | 140   | 695.5  | 1.43387  | 6.660953 | 2.215814 | Up | 1.60E-14 | 6.57E-14 |
| Pou2f1       | 2566 | 118   | 589    | 1.649102 | 7.660106 | 2.215683 | Up | 0        | 0        |
| Il17rb       | 2056 | 3.5   | 17.5   | 0.060776 | 0.282208 | 2.215194 | Up | 0.001563 | 0.002614 |
| Kdm6a        | 6059 | 929   | 4614.5 | 5.473521 | 25.40975 | 2.214841 | Up | 1.35E-12 | 4.16E-12 |
| Aplnr        | 3670 | 42    | 207.5  | 0.406383 | 1.886325 | 2.214665 | Up | 1.10E-13 | 4.23E-13 |
| Samd10       | 1316 | 39    | 195.5  | 1.063496 | 4.934856 | 2.214194 | Up | 1.32E-13 | 4.99E-13 |
| Zfp281       | 3114 | 1019  | 5060.5 | 11.70168 | 54.28559 | 2.213854 | Up | 1.08E-12 | 3.38E-12 |
| Nf1          | 9132 | 629   | 3119   | 2.458485 | 11.39762 | 2.212891 | Up | 1.00E-12 | 3.16E-12 |
| Adm          | 1395 | 1540  | 7659.5 | 39.54991 | 183.3425 | 2.212795 | Up | 1.19E-12 | 3.68E-12 |
| Zfp37        | 3369 | 361.5 | 1791.5 | 3.833906 | 17.76406 | 2.212075 | Up | 0        | 0        |
| Ybey         | 4419 | 150.5 | 746    | 1.217324 | 5.639299 | 2.211802 | Up | 7.11E-15 | 2.97E-14 |
| LOC654482    | 1344 | 58.5  | 290.5  | 1.556889 | 7.210728 | 2.211479 | Up | 1.35E-14 | 5.59E-14 |
| Tex12        | 372  | 5     | 25     | 0.482499 | 2.23406  | 2.21107  | Up | 0.00022  | 0.000398 |
| Daam1        | 5722 | 1827  | 9032   | 11.41545 | 52.70839 | 2.207045 | Up | 2.38E-12 | 7.04E-12 |
| Harbi1       | 1460 | 203   | 1004   | 4.969448 | 22.93696 | 2.206516 | Up | 1.92E-13 | 7.01E-13 |
| Vav1         | 2917 | 15.5  | 76     | 0.18788  | 0.867089 | 2.206369 | Up | 7.52E-08 | 1.68E-07 |
| LOC100913004 | 2186 | 117   | 578    | 1.914418 | 8.831097 | 2.205687 | Up | 1.22E-13 | 4.64E-13 |
| Btbd11       | 5629 | 50    | 248    | 0.318458 | 1.468063 | 2.204737 | Up | 3.62E-14 | 1.46E-13 |
| Zfp949       | 3074 | 86    | 422    | 0.995496 | 4.58804  | 2.20439  | Up | 0        | 0        |
| Med12l       | 3985 | 153.5 | 758.5  | 1.380581 | 6.359661 | 2.203674 | Up | 0        | 0        |
| RGD1565007   | 3423 | 4     | 20     | 0.04215  | 0.194022 | 2.20261  | Up | 0.000956 | 0.001628 |
| Gbp5         | 2810 | 177.5 | 875    | 2.25941  | 10.38792 | 2.200889 | Up | 0        | 0        |

|              |      |        |        |          |          |          |    |          |          |
|--------------|------|--------|--------|----------|----------|----------|----|----------|----------|
| Map3k14      | 4206 | 443.5  | 2183.5 | 3.773217 | 17.32823 | 2.199258 | Up | 0        | 0        |
| LOC100909537 | 826  | 11     | 54.5   | 0.480003 | 2.203428 | 2.198633 | Up | 9.20E-07 | 1.96E-06 |
| Asb14        | 2008 | 6.5    | 31.5   | 0.113976 | 0.523075 | 2.198288 | Up | 4.05E-05 | 7.83E-05 |
| Zfp35        | 2807 | 371    | 1818   | 4.715563 | 21.61999 | 2.196864 | Up | 5.35E-13 | 1.78E-12 |
| LOC100361928 | 2487 | 28     | 137.5  | 0.403328 | 1.848949 | 2.196679 | Up | 1.93E-11 | 4.98E-11 |
| Mxd1         | 2633 | 155    | 763    | 2.110197 | 9.67358  | 2.196672 | Up | 3.73E-13 | 1.29E-12 |
| LOC100912751 | 651  | 15     | 73.5   | 0.821856 | 3.767405 | 2.196614 | Up | 7.53E-08 | 1.68E-07 |
| Il1rl1       | 2065 | 1391   | 6809.5 | 24.02694 | 110.1133 | 2.196264 | Up | 7.32E-12 | 1.95E-11 |
| Gabrb1       | 1944 | 4      | 19.5   | 0.073038 | 0.334667 | 2.196006 | Up | 0.00159  | 0.002657 |
| Iah1         | 1036 | 74.5   | 362    | 2.549691 | 11.67821 | 2.195425 | Up | 9.99E-15 | 4.15E-14 |
| Lcor         | 4732 | 214.5  | 1048   | 1.614711 | 7.391542 | 2.1946   | Up | 0        | 0        |
| Hes1         | 1436 | 1559   | 7638   | 38.76317 | 177.308  | 2.193499 | Up | 7.56E-12 | 2.01E-11 |
| LOC100909474 | 1564 | 106    | 522    | 2.434739 | 11.13166 | 2.19283  | Up | 0        | 0        |
| Tmem128      | 1104 | 629.5  | 3059.5 | 20.22827 | 92.48324 | 2.192819 | Up | 1.00E-12 | 3.16E-12 |
| Nr3c1        | 6327 | 3273.5 | 15994  | 18.46674 | 84.32969 | 2.191111 | Up | 0        | 0        |
| Ssu72        | 1063 | 909    | 4452   | 30.63805 | 139.7307 | 2.189252 | Up | 2.43E-12 | 7.16E-12 |
| Zxdb         | 2313 | 182    | 890    | 2.817612 | 12.83807 | 2.187884 | Up | 0        | 0        |
| Ifngr2       | 2610 | 247.5  | 1211   | 3.396863 | 15.47407 | 2.187578 | Up | 0        | 0        |
| LOC691254    | 1443 | 13     | 62.5   | 0.31959  | 1.455112 | 2.186837 | Up | 2.65E-07 | 5.80E-07 |
| Pan2         | 3618 | 463    | 2260.5 | 4.584139 | 20.86518 | 2.186375 | Up | 1.22E-12 | 3.78E-12 |
| Odf2l        | 2396 | 177.5  | 861.5  | 2.639997 | 12.01519 | 2.186251 | Up | 0        | 0        |
| Smndc1       | 1843 | 1482.5 | 7235   | 28.78743 | 130.9927 | 2.185975 | Up | 3.37E-12 | 9.65E-12 |
| LOC691849    | 737  | 57.5   | 281.5  | 2.794495 | 12.70643 | 2.184899 | Up | 5.37E-14 | 2.13E-13 |
| Gjb3         | 813  | 53.5   | 262    | 2.364261 | 10.74827 | 2.184643 | Up | 4.04E-14 | 1.62E-13 |
| Ccdc73       | 3201 | 10     | 49     | 0.111071 | 0.504609 | 2.183682 | Up | 1.78E-06 | 3.72E-06 |

|              |      |        |         |          |          |          |    |          |          |
|--------------|------|--------|---------|----------|----------|----------|----|----------|----------|
| RGD1560065   | 1472 | 226.5  | 1097.5  | 5.476246 | 24.87097 | 2.183204 | Up | 3.18E-14 | 1.29E-13 |
| LOC100911496 | 2915 | 25     | 122.5   | 0.308069 | 1.398571 | 2.182627 | Up | 1.30E-10 | 3.22E-10 |
| Fam212a      | 1062 | 20     | 98      | 0.679283 | 3.083435 | 2.182453 | Up | 3.18E-09 | 7.52E-09 |
| LOC100912181 | 937  | 20.5   | 99      | 0.776452 | 3.522726 | 2.181724 | Up | 3.18E-09 | 7.52E-09 |
| Zfp53        | 2536 | 72     | 349.5   | 1.015928 | 4.607075 | 2.181053 | Up | 0        | 0        |
| LOC686240    | 3820 | 627.5  | 3038.5  | 5.858265 | 26.56015 | 2.180718 | Up | 6.79E-13 | 2.21E-12 |
| Gria3        | 5052 | 768    | 3712.5  | 5.421003 | 24.53357 | 2.178125 | Up | 0        | 0        |
| Orc4         | 1755 | 809.5  | 3910    | 16.43179 | 74.36161 | 2.178068 | Up | 1.03E-12 | 3.23E-12 |
| Luc7l3       | 3331 | 2237   | 10823.5 | 23.97293 | 108.4828 | 2.177988 | Up | 0        | 0        |
| Jmjd1c       | 8363 | 2577.5 | 12472.5 | 11.01584 | 49.79617 | 2.176455 | Up | 0        | 0        |
| LOC303448    | 3174 | 32.5   | 157.5   | 0.365407 | 1.651756 | 2.176425 | Up | 1.74E-12 | 5.25E-12 |
| Txlng        | 3067 | 184.5  | 892     | 2.146892 | 9.701055 | 2.175892 | Up | 3.15E-13 | 1.11E-12 |
| LOC100363155 | 1248 | 12     | 58      | 0.343151 | 1.550188 | 2.17553  | Up | 4.95E-07 | 1.07E-06 |
| Itpka        | 1831 | 6      | 29      | 0.117258 | 0.5283   | 2.171671 | Up | 8.58E-05 | 0.000161 |
| LOC681908    | 1923 | 62.5   | 301     | 1.160467 | 5.226381 | 2.171107 | Up | 0        | 0        |
| Mybl1        | 3643 | 2633.5 | 12696   | 25.82488 | 116.2921 | 2.17092  | Up | 0        | 0        |
| Mrpl1        | 1207 | 295    | 1412.5  | 8.685358 | 39.08792 | 2.170066 | Up | 3.74E-13 | 1.29E-12 |
| Crnn         | 1578 | 12     | 57      | 0.269935 | 1.214543 | 2.169727 | Up | 5.04E-07 | 1.09E-06 |
| Ninj2        | 907  | 28     | 135.5   | 1.108458 | 4.98728  | 2.169699 | Up | 1.93E-11 | 4.98E-11 |
| Btbd10       | 2300 | 1281.5 | 6169.5  | 19.92315 | 89.57352 | 2.168627 | Up | 4.10E-12 | 1.15E-11 |
| Pkp3         | 2955 | 23.5   | 112.5   | 0.284279 | 1.277925 | 2.168421 | Up | 4.68E-10 | 1.13E-09 |
| LOC682431    | 1846 | 122    | 587     | 2.364872 | 10.60675 | 2.165148 | Up | 4.93E-14 | 1.96E-13 |
| Vtn          | 1628 | 4      | 19.5    | 0.088624 | 0.397416 | 2.16488  | Up | 0.00159  | 0.002657 |
| RGD1308147   | 2035 | 285    | 1369.5  | 5.008875 | 22.45051 | 2.16419  | Up | 6.22E-13 | 2.04E-12 |
| LOC100361765 | 1477 | 5      | 24      | 0.11997  | 0.537633 | 2.163945 | Up | 0.000353 | 0.00063  |

|              |      |        |        |          |          |          |    |          |          |
|--------------|------|--------|--------|----------|----------|----------|----|----------|----------|
| Bcdin3d      | 1254 | 60.5   | 288.5  | 1.718382 | 7.69581  | 2.163023 | Up | 0        | 0        |
| Nuak2        | 2900 | 900.5  | 4325.5 | 11.12545 | 49.77317 | 2.161505 | Up | 6.71E-13 | 2.18E-12 |
| Zmynd10      | 1754 | 44.5   | 213.5  | 0.908332 | 4.063646 | 2.161483 | Up | 8.13E-14 | 3.18E-13 |
| Tmem68       | 2664 | 681    | 3239   | 9.074319 | 40.58021 | 2.160915 | Up | 1.16E-13 | 4.45E-13 |
| Taf9b        | 2477 | 181    | 871    | 2.615919 | 11.69746 | 2.160805 | Up | 1.41E-13 | 5.30E-13 |
| Tmem67       | 4035 | 296.5  | 1418.5 | 2.625801 | 11.74033 | 2.160644 | Up | 3.73E-13 | 1.29E-12 |
| Cep112       | 3450 | 83     | 397    | 0.859708 | 3.842424 | 2.160097 | Up | 1.43E-13 | 5.34E-13 |
| Prr5l        | 2466 | 321    | 1532.5 | 4.645823 | 20.74373 | 2.158669 | Up | 0        | 0        |
| Abca12       | 8344 | 6      | 29     | 0.025868 | 0.115498 | 2.158606 | Up | 8.58E-05 | 0.00016  |
| LOC682225    | 4765 | 169.5  | 808.5  | 1.27041  | 5.668959 | 2.15779  | Up | 8.88E-15 | 3.70E-14 |
| Prss22       | 1271 | 42     | 199.5  | 1.176135 | 5.246514 | 2.157305 | Up | 1.10E-13 | 4.23E-13 |
| LOC100361568 | 1087 | 218    | 1037   | 7.146856 | 31.86019 | 2.156374 | Up | 0        | 0        |
| Pex11g       | 1152 | 30     | 143    | 0.929864 | 4.145151 | 2.156333 | Up | 5.60E-12 | 1.52E-11 |
| Zfp968       | 3308 | 16     | 76.5   | 0.172381 | 0.767334 | 2.15425  | Up | 4.02E-08 | 9.11E-08 |
| Pex12        | 2347 | 54.5   | 259.5  | 0.829095 | 3.69051  | 2.154211 | Up | 3.66E-14 | 1.48E-13 |
| LOC684233    | 4674 | 577    | 2755.5 | 4.419608 | 19.66902 | 2.153935 | Up | 5.81E-13 | 1.92E-12 |
| Pcbd1        | 744  | 17     | 81     | 0.816857 | 3.633645 | 2.153262 | Up | 2.14E-08 | 4.89E-08 |
| LOC100363406 | 717  | 115    | 548    | 5.748089 | 25.56259 | 2.15288  | Up | 0        | 0        |
| Ptpn7        | 2032 | 16.5   | 79     | 0.292397 | 1.300226 | 2.152762 | Up | 4.02E-08 | 9.10E-08 |
| Cbwd1        | 1405 | 196    | 932    | 4.978356 | 22.12072 | 2.151657 | Up | 1.28E-13 | 4.85E-13 |
| LOC684258    | 625  | 1171   | 5569.5 | 66.93795 | 297.1126 | 2.150114 | Up | 3.90E-12 | 1.10E-11 |
| Rassf1       | 1148 | 914    | 4353.5 | 28.49543 | 126.4601 | 2.14988  | Up | 0        | 0        |
| Rab32        | 2069 | 1116.5 | 5291   | 19.23622 | 85.36183 | 2.149766 | Up | 3.19E-12 | 9.19E-12 |
| Fdx1         | 838  | 437    | 2079   | 18.6267  | 82.6094  | 2.148934 | Up | 8.15E-13 | 2.61E-12 |
| RGD1310552   | 4329 | 154.5  | 733.5  | 1.275829 | 5.655458 | 2.148209 | Up | 2.09E-13 | 7.59E-13 |

|              |      |        |         |          |          |          |    |          |          |
|--------------|------|--------|---------|----------|----------|----------|----|----------|----------|
| LOC687516    | 2534 | 1213.5 | 5754    | 17.10931 | 75.7506  | 2.146475 | Up | 5.51E-12 | 1.50E-11 |
| LOC100912612 | 826  | 12     | 57      | 0.521936 | 2.31047  | 2.146242 | Up | 5.04E-07 | 1.09E-06 |
| Adrb2        | 2065 | 91.5   | 432     | 1.579304 | 6.986297 | 2.145239 | Up | 0        | 0        |
| LOC500227    | 1949 | 7.5    | 36      | 0.139022 | 0.614841 | 2.144896 | Up | 1.46E-05 | 2.90E-05 |
| Wdr20a       | 4155 | 525    | 2492.5  | 4.523831 | 20.0063  | 2.144837 | Up | 4.15E-14 | 1.66E-13 |
| Sp6          | 1995 | 7      | 33      | 0.125843 | 0.556323 | 2.144303 | Up | 3.46E-05 | 6.71E-05 |
| RGD1560860   | 1431 | 4      | 19      | 0.100424 | 0.44392  | 2.144199 | Up | 0.00159  | 0.002657 |
| Tgfb2        | 2880 | 1733.5 | 8201    | 21.49736 | 95.00564 | 2.143854 | Up | 2.65E-12 | 7.76E-12 |
| LOC685655    | 1622 | 119    | 561     | 2.617856 | 11.56135 | 2.142852 | Up | 0        | 0        |
| LOC100158225 | 1994 | 504.5  | 2387.5  | 9.050461 | 39.95038 | 2.142146 | Up | 1.66E-13 | 6.14E-13 |
| Slc9a2       | 3942 | 14.5   | 68      | 0.12995  | 0.573415 | 2.141625 | Up | 1.41E-07 | 3.12E-07 |
| LOC100910178 | 4016 | 37.5   | 176     | 0.332775 | 1.468098 | 2.14133  | Up | 1.86E-13 | 6.81E-13 |
| Lrif1        | 3176 | 452    | 2128.5  | 5.075785 | 22.39042 | 2.141179 | Up | 6.60E-13 | 2.15E-12 |
| Il13ra2      | 1938 | 10     | 47.5    | 0.18464  | 0.813892 | 2.140123 | Up | 2.07E-06 | 4.32E-06 |
| Ccdc18       | 4389 | 164    | 772     | 1.331071 | 5.865577 | 2.139685 | Up | 1.50E-13 | 5.56E-13 |
| Myc          | 2355 | 3202.5 | 15160.5 | 48.79809 | 214.8288 | 2.138291 | Up | 0        | 0        |
| RGD1565883   | 1807 | 18     | 85      | 0.357081 | 1.571986 | 2.138266 | Up | 1.14E-08 | 2.63E-08 |
| Kif5a        | 3485 | 6      | 28.5    | 0.061936 | 0.272647 | 2.138188 | Up | 0.000133 | 0.000244 |
| Ranbp6       | 4522 | 1051.5 | 4938    | 8.282056 | 36.45026 | 2.137868 | Up | 1.50E-12 | 4.60E-12 |
| Ppp1r14a     | 559  | 5.5    | 25.5    | 0.348481 | 1.533478 | 2.137656 | Up | 0.00022  | 0.000399 |
| LOC686087    | 579  | 22.5   | 104     | 1.372218 | 6.034247 | 2.136664 | Up | 8.87E-10 | 2.13E-09 |
| LOC100912806 | 1514 | 58     | 272     | 1.364764 | 5.999942 | 2.136297 | Up | 1.35E-14 | 5.60E-14 |
| Optc         | 1253 | 13     | 60.5    | 0.368966 | 1.618877 | 2.133432 | Up | 2.74E-07 | 5.99E-07 |
| Syt2         | 2681 | 4      | 19      | 0.053602 | 0.234931 | 2.131883 | Up | 0.00159  | 0.002658 |
| Arl4a        | 1067 | 690.5  | 3222.5  | 23.00929 | 100.8091 | 2.131338 | Up | 2.44E-15 | 1.03E-14 |

|              |      |        |        |          |          |          |    |          |          |
|--------------|------|--------|--------|----------|----------|----------|----|----------|----------|
| Tspan2       | 3854 | 184    | 862.5  | 1.704814 | 7.466729 | 2.130862 | Up | 3.15E-13 | 1.11E-12 |
| LOC100361574 | 486  | 547.5  | 2540.5 | 39.87066 | 174.6001 | 2.130655 | Up | 0        | 0        |
| LOC100363372 | 1980 | 39     | 182    | 0.701636 | 3.072525 | 2.130631 | Up | 1.32E-13 | 4.99E-13 |
| Polh         | 3179 | 556.5  | 2611   | 6.258354 | 27.4048  | 2.130574 | Up | 8.86E-14 | 3.44E-13 |
| Unc13b       | 6599 | 116    | 544.5  | 0.629534 | 2.756125 | 2.130285 | Up | 9.68E-14 | 3.75E-13 |
| Zfp39        | 4013 | 150    | 703.5  | 1.336238 | 5.848734 | 2.129947 | Up | 7.11E-15 | 2.97E-14 |
| Kif24        | 4077 | 286.5  | 1340.5 | 2.516467 | 10.98748 | 2.126389 | Up | 3.49E-14 | 1.41E-13 |
| Rbak         | 2924 | 76     | 355.5  | 0.929678 | 4.057477 | 2.12578  | Up | 0        | 0        |
| Slamf8       | 1600 | 37     | 173.5  | 0.828562 | 3.616163 | 2.125778 | Up | 1.86E-13 | 6.81E-13 |
| Tial1        | 1680 | 2040.5 | 9516.5 | 43.3711  | 189.045  | 2.123924 | Up | 0        | 0        |
| Gpcpd1       | 3229 | 291    | 1352   | 3.209363 | 13.98788 | 2.123819 | Up | 1.98E-13 | 7.23E-13 |
| LOC689826    | 510  | 3.5    | 16.5   | 0.247258 | 1.077514 | 2.123619 | Up | 0.00265  | 0.004347 |
| LOC100909688 | 2554 | 53     | 248    | 0.743239 | 3.23666  | 2.122608 | Up | 4.04E-14 | 1.62E-13 |
| Kcnh2        | 3889 | 24     | 111.5  | 0.220827 | 0.96127  | 2.122023 | Up | 2.47E-10 | 6.03E-10 |
| Chd7         | 9304 | 201.5  | 937.5  | 0.773398 | 3.364304 | 2.121024 | Up | 0        | 0        |
| Chrna5       | 3007 | 12     | 56     | 0.1428   | 0.621171 | 2.120997 | Up | 5.19E-07 | 1.12E-06 |
| RGD1565367   | 1989 | 24.5   | 113.5  | 0.439183 | 1.910384 | 2.120968 | Up | 2.47E-10 | 6.03E-10 |
| Plac9        | 410  | 17     | 79     | 1.478101 | 6.428678 | 2.120778 | Up | 2.14E-08 | 4.90E-08 |
| Btn2a2       | 1572 | 105    | 486    | 2.378793 | 10.32359 | 2.117644 | Up | 0        | 0        |
| Higd1a       | 1443 | 3067.5 | 14216  | 75.81194 | 328.8388 | 2.116884 | Up | 0        | 0        |
| Zfp18        | 2192 | 322.5  | 1497.5 | 5.260848 | 22.81469 | 2.116596 | Up | 3.42E-13 | 1.19E-12 |
| LOC100912964 | 1029 | 14.5   | 67     | 0.500612 | 2.170375 | 2.11618  | Up | 1.41E-07 | 3.13E-07 |
| LOC100911441 | 835  | 7.5    | 34.5   | 0.317629 | 1.37676  | 2.115862 | Up | 2.44E-05 | 4.78E-05 |
| Spint1       | 2321 | 4      | 18.5   | 0.061669 | 0.267086 | 2.114694 | Up | 0.002645 | 0.004342 |
| Plch1        | 5623 | 52     | 242    | 0.331118 | 1.434005 | 2.114633 | Up | 5.13E-14 | 2.04E-13 |



|              |      |       |        |          |          |          |    |          |          |
|--------------|------|-------|--------|----------|----------|----------|----|----------|----------|
| Slc44a3      | 2302 | 8     | 37     | 0.123857 | 0.536235 | 2.114188 | Up | 1.45E-05 | 2.88E-05 |
| Zcchc10      | 1170 | 232   | 1076.5 | 7.083716 | 30.65756 | 2.113665 | Up | 3.80E-13 | 1.31E-12 |
| LOC100362927 | 366  | 5.5   | 25.5   | 0.535376 | 2.315064 | 2.112428 | Up | 0.00022  | 0.000398 |
| Cd274        | 873  | 30    | 139    | 1.230978 | 5.318977 | 2.111344 | Up | 5.60E-12 | 1.52E-11 |
| Fam171b      | 3127 | 267   | 1235   | 3.051146 | 13.17193 | 2.110043 | Up | 7.08E-13 | 2.29E-12 |
| Cyp2j3       | 3678 | 67.5  | 311.5  | 0.65429  | 2.824563 | 2.110025 | Up | 0        | 0        |
| 11-Mar       | 1572 | 4.5   | 21     | 0.103345 | 0.446007 | 2.1096   | Up | 0.000579 | 0.001005 |
| Dcun1d1      | 1703 | 449.5 | 2075.5 | 9.440631 | 40.73951 | 2.109473 | Up | 1.57E-12 | 4.80E-12 |
| Kcnk5        | 3489 | 3.5   | 16.5   | 0.036143 | 0.155956 | 2.109372 | Up | 0.00265  | 0.004346 |
| Epc2l1       | 2427 | 369.5 | 1704.5 | 5.441105 | 23.44094 | 2.107059 | Up | 0        | 0        |
| Hist2h2ac    | 506  | 7     | 32.5   | 0.496158 | 2.136406 | 2.106313 | Up | 5.16E-05 | 9.84E-05 |
| Cpt1b        | 2826 | 78    | 358.5  | 0.986836 | 4.247319 | 2.10567  | Up | 0        | 0        |
| Pnrc1        | 1619 | 837   | 3868.5 | 18.50474 | 79.60477 | 2.10496  | Up | 8.45E-13 | 2.70E-12 |
| Rbm4         | 1444 | 426.5 | 1970.5 | 10.57073 | 45.45752 | 2.104444 | Up | 5.03E-13 | 1.69E-12 |
| Mettl7b      | 1317 | 3.5   | 16     | 0.094443 | 0.40561  | 2.102582 | Up | 0.00265  | 0.004348 |
| Toag1        | 1789 | 173.5 | 798    | 3.470153 | 14.90004 | 2.102245 | Up | 3.79E-13 | 1.30E-12 |
| Amotl2       | 4141 | 5557  | 25618  | 48.06266 | 206.3302 | 2.101966 | Up | 1.55E-11 | 4.03E-11 |
| LOC100911566 | 1461 | 52.5  | 240.5  | 1.281724 | 5.501149 | 2.101647 | Up | 5.13E-14 | 2.04E-13 |
| RGD1310794   | 1910 | 249.5 | 1145   | 4.65884  | 19.99387 | 2.101515 | Up | 1.13E-14 | 4.70E-14 |
| LOC100911574 | 338  | 7     | 32     | 0.735983 | 3.155556 | 2.100149 | Up | 5.16E-05 | 9.84E-05 |
| Kctd19       | 2965 | 31    | 142    | 0.373931 | 1.601392 | 2.098481 | Up | 3.08E-12 | 8.90E-12 |
| Timm9        | 801  | 415.5 | 1900.5 | 18.48046 | 79.1408  | 2.098421 | Up | 0        | 0        |
| Tmprss6      | 2999 | 23    | 106.5  | 0.27615  | 1.181876 | 2.097552 | Up | 4.68E-10 | 1.13E-09 |
| LOC686999    | 1067 | 457   | 2089.5 | 15.28632 | 65.37403 | 2.096477 | Up | 1.73E-12 | 5.23E-12 |
| RGD1309313   | 2064 | 10    | 45.5   | 0.172257 | 0.736652 | 2.09642  | Up | 2.86E-06 | 5.94E-06 |

|              |      |       |        |          |          |          |    |          |          |
|--------------|------|-------|--------|----------|----------|----------|----|----------|----------|
| RGD1561241   | 4941 | 192.5 | 878    | 1.386039 | 5.91834  | 2.094225 | Up | 0        | 0        |
| Mettl16      | 2747 | 520.5 | 2376.5 | 6.768392 | 28.88886 | 2.093628 | Up | 1.11E-12 | 3.45E-12 |
| Hfe2         | 2150 | 3.5   | 16     | 0.057852 | 0.246786 | 2.092826 | Up | 0.00265  | 0.004346 |
| Oit3         | 2289 | 59.5  | 272    | 0.929519 | 3.964575 | 2.09261  | Up | 2.53E-14 | 1.03E-13 |
| Itga8        | 5896 | 85    | 387.5  | 0.514898 | 2.193579 | 2.090927 | Up | 0        | 0        |
| Kdm6b        | 4679 | 1524  | 6982.5 | 11.69187 | 49.80632 | 2.090823 | Up | 3.96E-12 | 1.11E-11 |
| Usp49        | 5363 | 93    | 424.5  | 0.619663 | 2.639409 | 2.090659 | Up | 3.69E-14 | 1.49E-13 |
| Slc28a2      | 2881 | 10    | 46     | 0.124204 | 0.528703 | 2.089743 | Up | 2.37E-06 | 4.93E-06 |
| Ppef1        | 2497 | 92    | 419.5  | 1.318175 | 5.610299 | 2.089535 | Up | 6.66E-15 | 2.78E-14 |
| Gpr15        | 1939 | 6     | 27.5   | 0.111318 | 0.473743 | 2.089413 | Up | 0.000211 | 0.000383 |
| Slc16a10     | 2540 | 4.5   | 20.5   | 0.063283 | 0.269283 | 2.089244 | Up | 0.000956 | 0.001629 |
| Spag8        | 1592 | 8     | 37     | 0.181256 | 0.770862 | 2.088443 | Up | 1.45E-05 | 2.88E-05 |
| Eil          | 3069 | 810.5 | 3700.5 | 9.477832 | 40.273   | 2.087184 | Up | 0        | 0        |
| LOC100909847 | 937  | 11    | 49.5   | 0.418245 | 1.776732 | 2.086807 | Up | 1.34E-06 | 2.84E-06 |
| LOC689963    | 1247 | 3.5   | 16     | 0.101124 | 0.429101 | 2.085194 | Up | 0.00265  | 0.004348 |
| Pap0lg       | 3725 | 342.5 | 1556   | 3.288828 | 13.95449 | 2.085084 | Up | 2.29E-13 | 8.24E-13 |
| LOC100361514 | 1425 | 5.5   | 24.5   | 0.136702 | 0.578756 | 2.081918 | Up | 0.000353 | 0.00063  |
| Icam5        | 3117 | 28    | 127    | 0.322544 | 1.365231 | 2.081575 | Up | 1.93E-11 | 4.98E-11 |
| Col11a2      | 5951 | 194.5 | 882    | 1.168512 | 4.94313  | 2.080752 | Up | 5.28E-13 | 1.76E-12 |
| Tbc1d10c     | 1719 | 5     | 23     | 0.103748 | 0.438858 | 2.08067  | Up | 0.000574 | 0.001009 |
| Tesc         | 909  | 8     | 36     | 0.312401 | 1.32027  | 2.079364 | Up | 2.06E-05 | 4.06E-05 |
| Trim69       | 1632 | 9.5   | 43     | 0.20777  | 0.875817 | 2.075642 | Up | 4.14E-06 | 8.51E-06 |
| RGD1561444   | 2213 | 70    | 314.5  | 1.125132 | 4.741302 | 2.075189 | Up | 0        | 0        |
| Shank1       | 7585 | 4     | 18.5   | 0.018871 | 0.079473 | 2.074337 | Up | 0.002645 | 0.004342 |
| Tubd1        | 1847 | 148.5 | 669    | 2.87001  | 12.08667 | 2.074289 | Up | 0        | 0        |

|              |       |        |         |          |          |          |    |          |          |
|--------------|-------|--------|---------|----------|----------|----------|----|----------|----------|
| Dcaf13       | 1526  | 1130.5 | 5094.5  | 26.47062 | 111.4628 | 2.074099 | Up | 2.28E-12 | 6.74E-12 |
| Casp4        | 1350  | 286.5  | 1288    | 7.569148 | 31.86683 | 2.073852 | Up | 3.49E-14 | 1.41E-13 |
| Myo16        | 6843  | 6.5    | 29.5    | 0.034283 | 0.144259 | 2.073094 | Up | 8.58E-05 | 0.000161 |
| Fam18b2      | 1677  | 1185.5 | 5314.5  | 25.15849 | 105.7935 | 2.072134 | Up | 2.13E-12 | 6.34E-12 |
| Kctd9        | 3106  | 1289   | 5788    | 14.79015 | 62.17716 | 2.071748 | Up | 5.50E-12 | 1.50E-11 |
| LOC100912012 | 980   | 8      | 36      | 0.293278 | 1.231965 | 2.070619 | Up | 2.06E-05 | 4.06E-05 |
| Eif4a2       | 1912  | 4611   | 20662.5 | 85.91464 | 360.6317 | 2.06955  | Up | 2.21E-11 | 5.66E-11 |
| Irf3         | 1114  | 8621   | 38795.5 | 277.2989 | 1161.712 | 2.066738 | Up | 0        | 0        |
| Zfp184       | 2595  | 124    | 555.5   | 1.710978 | 7.156503 | 2.064433 | Up | 1.27E-13 | 4.83E-13 |
| Chic1        | 1561  | 34     | 151     | 0.774983 | 3.241133 | 2.064262 | Up | 5.99E-13 | 1.97E-12 |
| Riok3        | 3843  | 3253   | 14543   | 30.23303 | 126.2836 | 2.062469 | Up | 0        | 0        |
| Magee1       | 3548  | 7      | 31.5    | 0.071083 | 0.296289 | 2.059428 | Up | 7.95E-05 | 0.000149 |
| Tf           | 2323  | 64     | 284.5   | 0.980912 | 4.088333 | 2.059317 | Up | 0        | 0        |
| Ip6k2        | 1894  | 530.5  | 2361.5  | 10.00136 | 41.67361 | 2.058938 | Up | 0        | 0        |
| Fat3         | 14492 | 6.5    | 29.5    | 0.016149 | 0.067248 | 2.058092 | Up | 8.58E-05 | 0.000161 |
| Serpib2      | 1942  | 449    | 1998    | 8.253772 | 34.36022 | 2.057614 | Up | 1.57E-12 | 4.80E-12 |
| Tec          | 2646  | 89     | 396     | 1.201209 | 4.999387 | 2.057264 | Up | 0        | 0        |
| Tmprss11d    | 1683  | 121.5  | 544.5   | 2.589244 | 10.77514 | 2.057104 | Up | 0        | 0        |
| Fzd8         | 3012  | 126    | 563     | 1.499574 | 6.234952 | 2.055826 | Up | 1.12E-13 | 4.31E-13 |
| Taf15        | 1494  | 3276   | 14552   | 78.29901 | 325.2691 | 2.054568 | Up | 0        | 0        |
| Vwa3a        | 4100  | 25.5   | 113     | 0.221785 | 0.921271 | 2.054463 | Up | 1.30E-10 | 3.22E-10 |
| LOC100909523 | 2463  | 16     | 71      | 0.231987 | 0.963526 | 2.054277 | Up | 4.13E-08 | 9.35E-08 |
| RGD1565787   | 734   | 62.5   | 277.5   | 3.049672 | 12.65489 | 2.052969 | Up | 0        | 0        |
| Nr4a3        | 4400  | 63     | 280.5   | 0.513002 | 2.128307 | 2.052669 | Up | 0        | 0        |
| Spock2       | 5322  | 53.5   | 237.5   | 0.360092 | 1.49322  | 2.051989 | Up | 4.04E-14 | 1.62E-13 |

|              |      |       |        |          |          |          |    |          |          |
|--------------|------|-------|--------|----------|----------|----------|----|----------|----------|
| LOC307263    | 1235 | 14.5  | 64.5   | 0.418502 | 1.735303 | 2.051881 | Up | 1.45E-07 | 3.21E-07 |
| N4bp3        | 2018 | 126.5 | 562.5  | 2.244664 | 9.305169 | 2.051533 | Up | 1.12E-13 | 4.31E-13 |
| Cln1         | 3197 | 4     | 18     | 0.045488 | 0.18854  | 2.051298 | Up | 0.002645 | 0.004342 |
| Gtlf3b       | 3411 | 532   | 2365.5 | 5.587692 | 23.14595 | 2.050436 | Up | 0        | 0        |
| Zcchc7       | 2019 | 670   | 2968.5 | 11.85498 | 49.08692 | 2.049846 | Up | 2.10E-13 | 7.62E-13 |
| Tbx6         | 1726 | 8.5   | 38     | 0.176387 | 0.729837 | 2.048829 | Up | 1.08E-05 | 2.16E-05 |
| Rfc4         | 1265 | 1231  | 5426   | 34.62111 | 143.1593 | 2.047898 | Up | 3.14E-12 | 9.07E-12 |
| Zfp94        | 2476 | 63    | 279    | 0.910246 | 3.762811 | 2.047482 | Up | 0        | 0        |
| Ccdc96       | 1773 | 11.5  | 50.5   | 0.232258 | 0.959833 | 2.047054 | Up | 1.16E-06 | 2.46E-06 |
| Chac1        | 1569 | 757.5 | 3354   | 17.2731  | 71.37219 | 2.046835 | Up | 8.99E-13 | 2.86E-12 |
| Nsg1         | 1640 | 6     | 26.5   | 0.130914 | 0.540854 | 2.046617 | Up | 0.00034  | 0.000608 |
| F2rl3        | 1694 | 9     | 39.5   | 0.187742 | 0.775578 | 2.04652  | Up | 1.22E-05 | 2.43E-05 |
| Ajuba        | 3261 | 204   | 902.5  | 2.234289 | 9.229085 | 2.046372 | Up | 1.72E-13 | 6.33E-13 |
| LOC100912156 | 1099 | 66    | 291.5  | 2.140599 | 8.837129 | 2.045563 | Up | 0        | 0        |
| LOC306365    | 1020 | 13.5  | 59.5   | 0.471634 | 1.94624  | 2.04495  | Up | 2.83E-07 | 6.18E-07 |
| LOC100912294 | 2086 | 58    | 255    | 0.990258 | 4.085636 | 2.044684 | Up | 1.35E-14 | 5.59E-14 |
| Lrriq3       | 2417 | 11    | 48     | 0.161667 | 0.666763 | 2.044153 | Up | 1.64E-06 | 3.45E-06 |
| Fam126b      | 2080 | 107.5 | 473    | 1.835727 | 7.56676  | 2.043324 | Up | 0        | 0        |
| Il1rl2       | 2044 | 11    | 48.5   | 0.192291 | 0.792422 | 2.04298  | Up | 1.64E-06 | 3.45E-06 |
| LOC688064    | 1276 | 291   | 1275.5 | 8.094984 | 33.35856 | 2.042957 | Up | 1.98E-13 | 7.23E-13 |
| RGD1305014   | 1739 | 248.5 | 1096.5 | 5.113855 | 21.05595 | 2.041745 | Up | 7.11E-14 | 2.79E-13 |
| RGD1560394   | 665  | 4     | 18     | 0.216962 | 0.892876 | 2.041016 | Up | 0.002645 | 0.004343 |
| LOC100912538 | 1005 | 586.5 | 2575   | 20.80229 | 85.53616 | 2.039792 | Up | 0        | 0        |
| Kcnj15       | 1486 | 162.5 | 716.5  | 3.912846 | 16.08015 | 2.038991 | Up | 0        | 0        |
| Npy5r        | 2475 | 6.5   | 28.5   | 0.09386  | 0.385363 | 2.037632 | Up | 0.000133 | 0.000244 |

|              |      |        |         |          |          |          |    |          |          |
|--------------|------|--------|---------|----------|----------|----------|----|----------|----------|
| Ccdc36       | 1725 | 39     | 171.5   | 0.808015 | 3.316457 | 2.037189 | Up | 1.32E-13 | 4.99E-13 |
| Trmu         | 1566 | 133.5  | 586.5   | 3.049205 | 12.51412 | 2.037052 | Up | 1.20E-13 | 4.54E-13 |
| Tmem17       | 1532 | 248.5  | 1089.5  | 5.784614 | 23.72433 | 2.036075 | Up | 7.11E-14 | 2.79E-13 |
| lft74        | 2133 | 947    | 4152    | 15.8643  | 64.95    | 2.033545 | Up | 9.46E-13 | 3.00E-12 |
| RGD1305222   | 953  | 405.5  | 1780    | 15.21638 | 62.27348 | 2.032992 | Up | 0        | 0        |
| Myo5b        | 6075 | 4      | 18      | 0.023939 | 0.097887 | 2.031779 | Up | 0.002645 | 0.004343 |
| Fbxo34       | 2926 | 600.5  | 2639    | 7.361297 | 30.09634 | 2.031556 | Up | 0        | 0        |
| Fam188a      | 2321 | 1120   | 4899.5  | 17.23362 | 70.44491 | 2.03127  | Up | 3.22E-12 | 9.26E-12 |
| Hsf2bp       | 2816 | 86.5   | 379     | 1.098656 | 4.49091  | 2.031268 | Up | 0        | 0        |
| RGD1562657   | 3551 | 546.5  | 2387.5  | 5.501802 | 22.47701 | 2.030474 | Up | 1.34E-13 | 5.04E-13 |
| Rnf167       | 1882 | 502    | 2198.5  | 9.548387 | 38.99174 | 2.02984  | Up | 8.49E-13 | 2.71E-12 |
| Dido1        | 8741 | 1642.5 | 7185    | 6.725875 | 27.41999 | 2.027434 | Up | 1.13E-12 | 3.52E-12 |
| Mei1         | 4018 | 4.5    | 19.5    | 0.039719 | 0.16192  | 2.027376 | Up | 0.00159  | 0.002657 |
| PVR          | 1938 | 3471   | 15166.5 | 64.10719 | 261.2925 | 2.027108 | Up | 0        | 0        |
| LOC100912041 | 1099 | 1287.5 | 5603.5  | 41.87667 | 170.5312 | 2.025817 | Up | 7.41E-12 | 1.97E-11 |
| Usp16        | 2903 | 1541.5 | 6701    | 18.92918 | 77.07149 | 2.025585 | Up | 1.54E-12 | 4.71E-12 |
| Fhit         | 620  | 8      | 35      | 0.465419 | 1.894901 | 2.025521 | Up | 3.07E-05 | 5.96E-05 |
| LOC100911831 | 3005 | 287.5  | 1253    | 3.418655 | 13.91387 | 2.025023 | Up | 4.35E-13 | 1.48E-12 |
| LOC100362783 | 1054 | 38     | 165.5   | 1.290098 | 5.243707 | 2.023107 | Up | 1.45E-13 | 5.43E-13 |
| Cpt1c        | 2747 | 311    | 1355.5  | 4.052848 | 16.46268 | 2.022191 | Up | 0        | 0        |
| Nsrp1        | 1974 | 812.5  | 3533    | 14.71287 | 59.74139 | 2.021652 | Up | 1.63E-12 | 4.97E-12 |
| RGD1562665   | 1898 | 74     | 322.5   | 1.394527 | 5.657532 | 2.020397 | Up | 9.99E-15 | 4.15E-14 |
| S100a5       | 445  | 12     | 52      | 0.964941 | 3.911493 | 2.019207 | Up | 7.60E-07 | 1.63E-06 |
| LOC502730    | 1734 | 3.5    | 15.5    | 0.071731 | 0.290395 | 2.017353 | Up | 0.004499 | 0.007238 |
| LOC685009    | 2089 | 168    | 728.5   | 2.876085 | 11.63937 | 2.016834 | Up | 1.69E-13 | 6.23E-13 |

|              |      |        |        |          |          |          |    |          |          |
|--------------|------|--------|--------|----------|----------|----------|----|----------|----------|
| Mmrn2        | 3795 | 18     | 78     | 0.169421 | 0.685262 | 2.016047 | Up | 1.16E-08 | 2.69E-08 |
| Med6         | 1086 | 737    | 3187   | 24.24582 | 97.93128 | 2.014034 | Up | 0        | 0        |
| Rab40b       | 1861 | 21.5   | 92     | 0.409858 | 1.65534  | 2.013933 | Up | 1.69E-09 | 4.02E-09 |
| Mpzl2        | 3255 | 39     | 168    | 0.426449 | 1.722084 | 2.013711 | Up | 1.32E-13 | 4.98E-13 |
| Ccdc65       | 1863 | 55     | 239    | 1.059788 | 4.276837 | 2.012768 | Up | 0        | 0        |
| Sfn4         | 2307 | 56     | 241.5  | 0.867109 | 3.499075 | 2.012688 | Up | 1.58E-14 | 6.49E-14 |
| Eed          | 2046 | 1160   | 5007   | 20.23833 | 81.65673 | 2.012481 | Up | 3.48E-12 | 9.94E-12 |
| Pot1b        | 2141 | 65     | 280.5  | 1.086634 | 4.383163 | 2.012106 | Up | 0        | 0        |
| LOC679504    | 1906 | 344    | 1482   | 6.434787 | 25.95312 | 2.011944 | Up | 5.51E-13 | 1.83E-12 |
| Tbk1         | 2987 | 1028.5 | 4434   | 12.29698 | 49.57222 | 2.011227 | Up | 0        | 0        |
| LOC679863    | 1209 | 27.5   | 118    | 0.807051 | 3.251153 | 2.01022  | Up | 3.64E-11 | 9.17E-11 |
| Lsm5         | 539  | 616    | 2635.5 | 40.48872 | 162.9972 | 2.009255 | Up | 5.19E-13 | 1.73E-12 |
| Alg12        | 2058 | 397.5  | 1716   | 6.912181 | 27.80533 | 2.008148 | Up | 6.21E-13 | 2.04E-12 |
| Xkr6         | 2835 | 76.5   | 331    | 0.966085 | 3.884421 | 2.007478 | Up | 0        | 0        |
| LOC681469    | 912  | 5.5    | 24     | 0.21737  | 0.873666 | 2.006929 | Up | 0.000353 | 0.00063  |
| Ankrd37      | 793  | 76     | 325.5  | 3.41206  | 13.71268 | 2.006796 | Up | 0        | 0        |
| Atp6v1d      | 1328 | 3044   | 13100  | 81.96896 | 329.3929 | 2.00666  | Up | 0        | 0        |
| LOC100911886 | 2310 | 43     | 185    | 0.664854 | 2.670329 | 2.005909 | Up | 1.18E-13 | 4.48E-13 |
| Rbp2         | 674  | 123.5  | 533.5  | 6.575012 | 26.39572 | 2.005238 | Up | 0        | 0        |
| Myo1f        | 3818 | 54.5   | 233    | 0.50891  | 2.042438 | 2.00481  | Up | 3.66E-14 | 1.48E-13 |
| Smoc2        | 2718 | 22.5   | 96.5   | 0.296535 | 1.188844 | 2.003284 | Up | 8.89E-10 | 2.14E-09 |
| Mamdc4       | 3906 | 34     | 146.5  | 0.312358 | 1.251873 | 2.002816 | Up | 5.99E-13 | 1.97E-12 |
| Nxph1        | 2500 | 90.5   | 388    | 1.295009 | 5.180553 | 2.000144 | Up | 0        | 0        |
| Tyw5         | 1492 | 391.5  | 1677.5 | 9.38585  | 37.51939 | 1.999077 | Up | 3.67E-13 | 1.27E-12 |
| Ccdc34       | 2530 | 965.5  | 4136   | 13.65573 | 54.57982 | 1.998861 | Up | 0        | 0        |

|            |      |        |        |          |          |          |    |          |          |
|------------|------|--------|--------|----------|----------|----------|----|----------|----------|
| St14       | 3174 | 4      | 17     | 0.045095 | 0.180238 | 1.998851 | Up | 0.004389 | 0.007067 |
| Zfp606     | 2914 | 69     | 295.5  | 0.84632  | 3.376236 | 1.996141 | Up | 0        | 0        |
| Cdkn2aip   | 2280 | 1024   | 4369   | 16.00844 | 63.85437 | 1.995953 | Up | 3.91E-14 | 1.57E-13 |
| RGD1306502 | 3738 | 411    | 1746.5 | 3.918785 | 15.62467 | 1.995347 | Up | 0        | 0        |
| LOC500625  | 2678 | 93     | 397.5  | 1.242017 | 4.950787 | 1.994973 | Up | 3.69E-14 | 1.48E-13 |
| RGD1566229 | 771  | 4.5    | 19     | 0.205505 | 0.818092 | 1.993093 | Up | 0.00159  | 0.002657 |
| Chna1      | 1849 | 11     | 46.5   | 0.211019 | 0.839879 | 1.992806 | Up | 2.92E-06 | 6.06E-06 |
| Iba57      | 2338 | 51.5   | 219    | 0.785881 | 3.122332 | 1.990242 | Up | 8.44E-15 | 3.52E-14 |
| LOC501033  | 4356 | 4      | 17     | 0.032859 | 0.130504 | 1.989743 | Up | 0.004389 | 0.007068 |
| Med13      | 7024 | 3316.5 | 14083  | 16.85749 | 66.94819 | 1.989655 | Up | 0        | 0        |
| LOC690517  | 902  | 14.5   | 61     | 0.568554 | 2.256869 | 1.988953 | Up | 1.63E-07 | 3.61E-07 |
| Dus2l      | 1936 | 233    | 989    | 4.293228 | 17.03743 | 1.988573 | Up | 0        | 0        |
| Rn5-8s     | 156  | 1200   | 5070.5 | 271.5026 | 1077.306 | 1.98839  | Up | 1.80E-12 | 5.43E-12 |
| Prkrip1    | 1391 | 301.5  | 1282   | 7.75789  | 30.7803  | 1.988271 | Up | 0        | 0        |
| Mbd1       | 2491 | 739.5  | 3143   | 10.61452 | 42.10604 | 1.987988 | Up | 7.94E-13 | 2.54E-12 |
| RGD1561328 | 1280 | 4      | 17     | 0.110927 | 0.439903 | 1.987579 | Up | 0.004389 | 0.007067 |
| Klhl32     | 2456 | 44     | 186.5  | 0.642469 | 2.547187 | 1.987207 | Up | 8.13E-14 | 3.18E-13 |
| Asb5       | 1614 | 69     | 290    | 1.5152   | 6.006119 | 1.986925 | Up | 0        | 0        |
| Plxdc1     | 2874 | 5.5    | 23     | 0.068379 | 0.270945 | 1.986378 | Up | 0.000574 | 0.001009 |
| Lime1      | 1888 | 91.5   | 386.5  | 1.730705 | 6.855961 | 1.985999 | Up | 0        | 0        |
| Zfp263     | 3215 | 280.5  | 1191.5 | 3.120652 | 12.34776 | 1.984329 | Up | 0        | 0        |
| Ubxn7      | 2733 | 137.5  | 581.5  | 1.796409 | 7.107494 | 1.984225 | Up | 2.87E-13 | 1.01E-12 |
| Ahsp       | 557  | 13.5   | 57     | 0.863674 | 3.414988 | 1.983321 | Up | 3.23E-07 | 7.04E-07 |
| Tmem150c   | 2807 | 12.5   | 52.5   | 0.157612 | 0.622999 | 1.982854 | Up | 7.60E-07 | 1.63E-06 |
| Gckr       | 2296 | 10.5   | 44.5   | 0.163018 | 0.644148 | 1.982356 | Up | 3.67E-06 | 7.57E-06 |

|              |       |        |        |          |          |          |    |          |          |
|--------------|-------|--------|--------|----------|----------|----------|----|----------|----------|
| Rnf138       | 2753  | 489    | 2062.5 | 6.327648 | 24.9865  | 1.981408 | Up | 5.92E-13 | 1.95E-12 |
| Atg14        | 3409  | 205.5  | 867    | 2.153454 | 8.501721 | 1.981102 | Up | 4.23E-13 | 1.44E-12 |
| Clp1         | 1835  | 343    | 1448.5 | 6.677075 | 26.35392 | 1.98073  | Up | 0        | 0        |
| Pdzd9        | 936   | 5      | 21.5   | 0.192988 | 0.761609 | 1.980542 | Up | 0.001541 | 0.002584 |
| Da2-19       | 1073  | 77.5   | 324.5  | 2.556473 | 10.07807 | 1.978993 | Up | 0        | 0        |
| Acad11       | 3449  | 399    | 1683.5 | 4.134953 | 16.29508 | 1.978494 | Up | 0        | 0        |
| Dennd2d      | 1926  | 20     | 85     | 0.373069 | 1.470186 | 1.978483 | Up | 3.25E-09 | 7.66E-09 |
| Atp6v1h      | 1683  | 1289.5 | 5427.5 | 27.30556 | 107.588  | 1.97825  | Up | 5.50E-12 | 1.50E-11 |
| LOC680227    | 1191  | 58.5   | 246    | 1.750152 | 6.895261 | 1.978125 | Up | 1.35E-14 | 5.59E-14 |
| Tpd52l3      | 2290  | 15.5   | 65.5   | 0.241575 | 0.95161  | 1.977899 | Up | 8.38E-08 | 1.87E-07 |
| Ggps1        | 2620  | 636    | 2676.5 | 8.657859 | 34.08361 | 1.976996 | Up | 1.16E-12 | 3.60E-12 |
| LOC100910577 | 2022  | 123    | 518    | 2.166232 | 8.527283 | 1.976899 | Up | 0        | 0        |
| Fcrlb        | 1412  | 23.5   | 99.5   | 0.596152 | 2.346627 | 1.976837 | Up | 4.69E-10 | 1.14E-09 |
| Fnip2        | 4298  | 465    | 1958   | 3.866446 | 15.2137  | 1.976291 | Up | 0        | 0        |
| Zkscan3      | 2588  | 532.5  | 2238.5 | 7.342389 | 28.8417  | 1.973835 | Up | 0        | 0        |
| Fcgbpl1      | 7938  | 5      | 21     | 0.022467 | 0.088212 | 1.973162 | Up | 0.001541 | 0.002584 |
| LOC302022    | 1388  | 824.5  | 3455   | 21.19668 | 83.18792 | 1.972536 | Up | 7.74E-13 | 2.48E-12 |
| Nos3         | 3953  | 10     | 42     | 0.090812 | 0.356323 | 1.972235 | Up | 7.16E-06 | 1.45E-05 |
| Amt          | 2177  | 56.5   | 236.5  | 0.928029 | 3.633409 | 1.969082 | Up | 1.58E-14 | 6.49E-14 |
| Dnah8        | 14196 | 17     | 71     | 0.04273  | 0.167044 | 1.966912 | Up | 2.46E-08 | 5.60E-08 |
| Vpreb3       | 513   | 10     | 42     | 0.702    | 2.74395  | 1.966711 | Up | 7.16E-06 | 1.45E-05 |
| Fam83f       | 3062  | 23     | 95.5   | 0.268221 | 1.046731 | 1.964395 | Up | 4.76E-10 | 1.15E-09 |
| Zfp296       | 1438  | 15     | 63     | 0.374457 | 1.460827 | 1.963914 | Up | 9.82E-08 | 2.19E-07 |
| Gch1         | 1016  | 267    | 1119   | 9.403665 | 36.68291 | 1.963813 | Up | 7.08E-13 | 2.29E-12 |
| Asb1         | 2044  | 97     | 406.5  | 1.701214 | 6.635171 | 1.963569 | Up | 5.35E-14 | 2.12E-13 |



|              |      |        |         |          |          |          |    |          |          |
|--------------|------|--------|---------|----------|----------|----------|----|----------|----------|
| Tsc22d1      | 4547 | 7489   | 31282.5 | 58.91149 | 229.642  | 1.962766 | Up | 0        | 0        |
| Zfp187       | 4080 | 853.5  | 3553.5  | 7.456654 | 29.0587  | 1.96237  | Up | 9.86E-13 | 3.11E-12 |
| LOC678893    | 2664 | 1181   | 4927.5  | 15.85238 | 61.75348 | 1.96182  | Up | 2.07E-12 | 6.17E-12 |
| Usp11        | 3423 | 47.5   | 198.5   | 0.496302 | 1.933343 | 1.961806 | Up | 0        | 0        |
| Arid5b       | 4037 | 1621   | 6780    | 14.38913 | 56.03185 | 1.961268 | Up | 3.94E-12 | 1.11E-11 |
| Hsd17b1      | 1431 | 25     | 105     | 0.627147 | 2.440961 | 1.960572 | Up | 1.31E-10 | 3.23E-10 |
| LOC684830    | 1368 | 130    | 540.5   | 3.390812 | 13.19614 | 1.960413 | Up | 0        | 0        |
| Cir1         | 1356 | 619.5  | 2581.5  | 16.34851 | 63.62324 | 1.960395 | Up | 4.35E-13 | 1.48E-12 |
| Cetn3        | 936  | 304    | 1261    | 11.57657 | 45.0083  | 1.958983 | Up | 0        | 0        |
| Ifit3        | 2053 | 33     | 137.5   | 0.574343 | 2.232361 | 1.958585 | Up | 1.01E-12 | 3.19E-12 |
| Meig1        | 566  | 18     | 75      | 1.137983 | 4.422457 | 1.95837  | Up | 1.25E-08 | 2.90E-08 |
| Sco1         | 1600 | 380    | 1576    | 8.470204 | 32.89051 | 1.957203 | Up | 0        | 0        |
| Ifitm3       | 642  | 185    | 768.5   | 10.30512 | 39.9184  | 1.953693 | Up | 0        | 0        |
| Hnrnp3       | 1879 | 443    | 1837.5  | 8.419297 | 32.60751 | 1.953433 | Up | 0        | 0        |
| Vwa3b        | 4071 | 5      | 21      | 0.04409  | 0.170676 | 1.952745 | Up | 0.001541 | 0.002584 |
| Rrh          | 1109 | 17     | 70.5    | 0.54594  | 2.11147  | 1.951432 | Up | 2.65E-08 | 6.05E-08 |
| Lilrb4       | 1152 | 9.5    | 39.5    | 0.296332 | 1.145945 | 1.951253 | Up | 1.22E-05 | 2.43E-05 |
| Fbxl22       | 4460 | 18     | 74.5    | 0.144417 | 0.558401 | 1.951064 | Up | 1.33E-08 | 3.06E-08 |
| Atxn7        | 2760 | 309.5  | 1279.5  | 4.006727 | 15.48438 | 1.950317 | Up | 7.28E-13 | 2.34E-12 |
| Spin2a       | 1370 | 12     | 49.5    | 0.313011 | 1.209268 | 1.949848 | Up | 1.70E-06 | 3.56E-06 |
| LOC100359879 | 803  | 16     | 66      | 0.714419 | 2.759813 | 1.949728 | Up | 5.40E-08 | 1.22E-07 |
| Sgca         | 1693 | 50     | 206     | 1.056122 | 4.069866 | 1.946205 | Up | 3.62E-14 | 1.46E-13 |
| Hist1h1b     | 669  | 39     | 161     | 2.086875 | 8.037484 | 1.9454   | Up | 1.32E-13 | 4.99E-13 |
| Ttf1         | 2587 | 281    | 1156    | 3.875693 | 14.92619 | 1.94532  | Up | 0        | 0        |
| Slnf13       | 3396 | 4300.5 | 17716   | 45.24064 | 174.1611 | 1.944731 | Up | 1.61E-11 | 4.17E-11 |

|              |      |        |         |          |          |          |    |          |          |
|--------------|------|--------|---------|----------|----------|----------|----|----------|----------|
| LOC100359937 | 917  | 660.5  | 2718.5  | 25.69747 | 98.92366 | 1.944689 | Up | 0        | 0        |
| LOC100910965 | 537  | 20     | 82.5    | 1.330573 | 5.121717 | 1.94458  | Up | 3.45E-09 | 8.13E-09 |
| Lamp3        | 1927 | 8      | 33      | 0.148555 | 0.571751 | 1.944389 | Up | 7.40E-05 | 0.000139 |
| Gabpb1       | 2527 | 702.5  | 2893    | 9.93506  | 38.16899 | 1.941801 | Up | 0        | 0        |
| Mmp13        | 2602 | 346    | 1422    | 4.750769 | 18.24391 | 1.941182 | Up | 3.04E-13 | 1.07E-12 |
| Atf4         | 1173 | 6524.5 | 26850.5 | 199.0193 | 763.9557 | 1.940581 | Up | 4.50E-11 | 1.13E-10 |
| RGD1560994   | 660  | 2424   | 9911.5  | 130.6201 | 501.3096 | 1.940325 | Up | 0        | 0        |
| S1pr3        | 3606 | 7.5    | 31      | 0.073868 | 0.283275 | 1.939188 | Up | 7.95E-05 | 0.000149 |
| LOC100909787 | 2886 | 226.5  | 927.5   | 2.804477 | 10.7543  | 1.939111 | Up | 3.18E-14 | 1.29E-13 |
| LOC100910438 | 1457 | 270.5  | 1109    | 6.645517 | 25.42298 | 1.93568  | Up | 4.53E-13 | 1.53E-12 |
| RGD1308019   | 3010 | 40     | 164     | 0.474763 | 1.814298 | 1.934133 | Up | 1.16E-13 | 4.43E-13 |
| Herc6        | 4591 | 26     | 106     | 0.201151 | 0.768504 | 1.933776 | Up | 6.94E-11 | 1.73E-10 |
| Unc13c       | 7264 | 93.5   | 383     | 0.460472 | 1.758982 | 1.933554 | Up | 3.69E-14 | 1.49E-13 |
| Orai2        | 4047 | 856.5  | 3510    | 7.576856 | 28.9429  | 1.933538 | Up | 1.12E-12 | 3.49E-12 |
| Atp6v1b2     | 2717 | 2643.5 | 10786.5 | 34.70938 | 132.5774 | 1.933437 | Up | 0        | 0        |
| LOC681371    | 3469 | 1585.5 | 6472.5  | 16.29722 | 62.24355 | 1.933299 | Up | 4.62E-12 | 1.28E-11 |
| Slitrk2      | 2947 | 11     | 45.5    | 0.134927 | 0.515015 | 1.932437 | Up | 4.20E-06 | 8.62E-06 |
| Gstm4        | 1583 | 101    | 412.5   | 2.278727 | 8.697416 | 1.932359 | Up | 0        | 0        |
| LOC100911235 | 1229 | 452.5  | 1847    | 13.14291 | 50.1504  | 1.931977 | Up | 6.60E-13 | 2.15E-12 |
| LOC100363500 | 695  | 64     | 260.5   | 3.285246 | 12.52894 | 1.931191 | Up | 0        | 0        |
| LOC685572    | 1310 | 4.5    | 18.5    | 0.121387 | 0.462905 | 1.931097 | Up | 0.002645 | 0.004343 |
| Tmem19       | 1842 | 351    | 1430    | 6.793724 | 25.90746 | 1.931093 | Up | 9.48E-14 | 3.68E-13 |
| Plch2        | 4470 | 24     | 97.5    | 0.191098 | 0.728538 | 1.930688 | Up | 2.55E-10 | 6.23E-10 |
| LOC366469    | 774  | 9      | 36.5    | 0.41238  | 1.571536 | 1.93013  | Up | 4.35E-05 | 8.39E-05 |
| Ccdc28b      | 820  | 28     | 114.5   | 1.221866 | 4.655902 | 1.929974 | Up | 1.94E-11 | 5.00E-11 |

|                   |      |        |         |          |          |          |    |          |          |
|-------------------|------|--------|---------|----------|----------|----------|----|----------|----------|
| Slc7a7            | 2077 | 87     | 355.5   | 1.502454 | 5.723814 | 1.929657 | Up | 0        | 0        |
| Slc25a32          | 2348 | 328    | 1335.5  | 4.977188 | 18.95014 | 1.928806 | Up | 2.05E-13 | 7.47E-13 |
| LOC687539         | 1254 | 79     | 323.5   | 2.259317 | 8.598232 | 1.928153 | Up | 0        | 0        |
| Lpar6             | 1834 | 261.5  | 1066    | 5.099165 | 19.39948 | 1.927685 | Up | 2.23E-13 | 8.05E-13 |
| Mlycd             | 2020 | 144.5  | 587     | 2.555909 | 9.700672 | 1.924248 | Up | 1.05E-13 | 4.06E-13 |
| LOC100912353      | 647  | 24     | 98      | 1.325581 | 5.020876 | 1.921315 | Up | 2.52E-10 | 6.16E-10 |
| Pdrg1             | 1237 | 579    | 2348    | 16.73554 | 63.35977 | 1.920652 | Up | 9.45E-13 | 3.00E-12 |
| Tmem71            | 879  | 20     | 81      | 0.808962 | 3.062265 | 1.920456 | Up | 3.61E-09 | 8.51E-09 |
| Jrkl              | 2897 | 357    | 1438    | 4.381295 | 16.57861 | 1.919894 | Up | 3.20E-13 | 1.12E-12 |
| RGD1561238        | 336  | 18     | 73      | 1.906719 | 7.213502 | 1.919608 | Up | 1.45E-08 | 3.33E-08 |
| Sertad4           | 3197 | 2695.5 | 10920.5 | 30.14576 | 114.0417 | 1.919534 | Up | 0        | 0        |
| Zap70             | 2277 | 10.5   | 42      | 0.16312  | 0.617016 | 1.919379 | Up | 7.16E-06 | 1.45E-05 |
| Six4              | 5970 | 344    | 1394.5  | 2.061017 | 7.792841 | 1.918793 | Up | 5.51E-13 | 1.83E-12 |
| Ppp1r3f_predicted | 1920 | 113    | 457.5   | 2.103902 | 7.953342 | 1.918494 | Up | 2.08E-13 | 7.57E-13 |
| LOC100361660      | 1689 | 167.5  | 675.5   | 3.533555 | 13.34875 | 1.917513 | Up | 1.94E-13 | 7.09E-13 |
| MGC114483         | 1467 | 21.5   | 86      | 0.518763 | 1.958463 | 1.916576 | Up | 1.78E-09 | 4.24E-09 |
| RGD1563701        | 2157 | 68     | 275.5   | 1.128076 | 4.257819 | 1.91625  | Up | 0        | 0        |
| Nek3              | 1801 | 31     | 125.5   | 0.615606 | 2.322262 | 1.915451 | Up | 3.09E-12 | 8.93E-12 |
| RGD1565065        | 576  | 16     | 65      | 0.99597  | 3.756671 | 1.915281 | Up | 6.27E-08 | 1.41E-07 |
| Cutc              | 1302 | 254    | 1022    | 6.944639 | 26.19095 | 1.915097 | Up | 3.19E-13 | 1.12E-12 |
| Ppp1r3b           | 4360 | 62     | 250.5   | 0.508187 | 1.916043 | 1.9147   | Up | 0        | 0        |
| LOC100911230      | 598  | 16     | 65      | 0.959329 | 3.616961 | 1.914681 | Up | 6.27E-08 | 1.41E-07 |
| Rpp14             | 1906 | 1209.5 | 4874    | 22.64351 | 85.36313 | 1.914515 | Up | 3.27E-12 | 9.39E-12 |
| LOC100909617      | 1296 | 17     | 69      | 0.470706 | 1.774066 | 1.914161 | Up | 2.97E-08 | 6.77E-08 |
| Lmod1             | 3937 | 11     | 44.5    | 0.09925  | 0.374057 | 1.914115 | Up | 6.26E-06 | 1.27E-05 |

|              |      |       |        |          |          |          |    |          |          |
|--------------|------|-------|--------|----------|----------|----------|----|----------|----------|
| Slc1a2       | 2229 | 5     | 20     | 0.079496 | 0.299568 | 1.913933 | Up | 0.002522 | 0.004147 |
| Phc3         | 3415 | 650.5 | 2628.5 | 6.820385 | 25.68506 | 1.913004 | Up | 0        | 0        |
| Syce2        | 753  | 18.5  | 74.5   | 0.872663 | 3.285879 | 1.912782 | Up | 1.33E-08 | 3.06E-08 |
| LOC100359855 | 728  | 14.5  | 58     | 0.706808 | 2.659938 | 1.912003 | Up | 2.42E-07 | 5.30E-07 |
| LOC680770    | 1941 | 15    | 60.5   | 0.276237 | 1.038564 | 1.910614 | Up | 1.74E-07 | 3.83E-07 |
| Rictor       | 5300 | 643   | 2586   | 4.334757 | 16.29398 | 1.910316 | Up | 0        | 0        |
| RGD1305089   | 2363 | 364.5 | 1464.5 | 5.508389 | 20.69629 | 1.90967  | Up | 1.34E-13 | 5.03E-13 |
| Sh3bgrl2     | 2685 | 50    | 202    | 0.669558 | 2.514799 | 1.909162 | Up | 3.62E-14 | 1.46E-13 |
| Spata7       | 1958 | 344.5 | 1386.5 | 6.2928   | 23.63063 | 1.908884 | Up | 5.51E-13 | 1.83E-12 |
| LOC100912037 | 1037 | 137.5 | 547.5  | 4.691834 | 17.60408 | 1.907686 | Up | 2.87E-13 | 1.01E-12 |
| Olr1220      | 942  | 5.5   | 22     | 0.207404 | 0.777824 | 1.907002 | Up | 0.00094  | 0.001601 |
| Rnf146       | 1889 | 715.5 | 2863   | 13.51315 | 50.63115 | 1.905661 | Up | 0        | 0        |
| Fam46b       | 1724 | 46    | 185.5  | 0.954773 | 3.576452 | 1.905299 | Up | 7.84E-14 | 3.07E-13 |
| Kcnn1        | 1611 | 25    | 100    | 0.554228 | 2.07578  | 1.905103 | Up | 1.35E-10 | 3.34E-10 |
| Dusp12       | 1314 | 187.5 | 751    | 5.099727 | 19.07633 | 1.903292 | Up | 3.37E-13 | 1.18E-12 |
| LOC686506    | 1839 | 153   | 612    | 2.972394 | 11.11861 | 1.903279 | Up | 0        | 0        |
| Grin2a       | 4717 | 7     | 28     | 0.053224 | 0.198947 | 1.902241 | Up | 0.000322 | 0.000577 |
| Ces1a        | 1896 | 7     | 28     | 0.131204 | 0.490206 | 1.901579 | Up | 0.000322 | 0.000577 |
| Pigv         | 2429 | 381.5 | 1527   | 5.618599 | 20.98059 | 1.900773 | Up | 3.02E-13 | 1.06E-12 |
| Mlh1         | 2274 | 505.5 | 2025   | 7.9513   | 29.68944 | 1.900687 | Up | 0        | 0        |
| Rnf190       | 3008 | 21    | 83.5   | 0.248101 | 0.926346 | 1.900625 | Up | 2.10E-09 | 4.98E-09 |
| Tnfrsf6      | 1401 | 208   | 831    | 5.30152  | 19.79111 | 1.900374 | Up | 3.49E-13 | 1.21E-12 |
| RGD1311188   | 1874 | 190.5 | 761    | 3.638281 | 13.57752 | 1.899891 | Up | 2.69E-13 | 9.58E-13 |
| Noxo1        | 1965 | 16.5  | 66     | 0.300616 | 1.121847 | 1.899883 | Up | 5.40E-08 | 1.22E-07 |
| Cgrrf1       | 1265 | 519   | 2072   | 14.65519 | 54.66654 | 1.899247 | Up | 0        | 0        |

|              |      |         |          |          |          |          |    |          |          |
|--------------|------|---------|----------|----------|----------|----------|----|----------|----------|
| Adat1        | 3057 | 100     | 399.5    | 1.172035 | 4.370325 | 1.898725 | Up | 1.75E-14 | 7.19E-14 |
| Hmg20a       | 3638 | 1949.5  | 7790     | 19.16756 | 71.44817 | 1.89823  | Up | 3.04E-12 | 8.80E-12 |
| Cdk7         | 1460 | 759     | 3018     | 18.5415  | 69.03685 | 1.896609 | Up | 1.87E-12 | 5.61E-12 |
| Jun          | 3107 | 6127.5  | 24471    | 70.62645 | 262.8175 | 1.895781 | Up | 1.55E-11 | 4.02E-11 |
| Plcb2        | 3999 | 6       | 24       | 0.053975 | 0.200821 | 1.895546 | Up | 0.000894 | 0.001526 |
| Prnp         | 2142 | 7797.5  | 31032    | 130.0679 | 483.8384 | 1.89526  | Up | 0        | 0        |
| Scube1       | 4237 | 6       | 24       | 0.051214 | 0.19039  | 1.894354 | Up | 0.000894 | 0.001526 |
| Tmem174      | 1378 | 6       | 24       | 0.155805 | 0.57887  | 1.893498 | Up | 0.000894 | 0.001525 |
| Trim39       | 2904 | 223.5   | 889      | 2.753287 | 10.22348 | 1.892659 | Up | 7.02E-14 | 2.76E-13 |
| Nmnat1       | 2130 | 222     | 883      | 3.727366 | 13.82627 | 1.891183 | Up | 0        | 0        |
| Adamts6      | 4770 | 539     | 2137.5   | 4.034775 | 14.96551 | 1.891081 | Up | 4.59E-13 | 1.55E-12 |
| LOC687565    | 815  | 4088    | 16209.5  | 179.0577 | 664.0349 | 1.890834 | Up | 1.29E-11 | 3.36E-11 |
| Chd2         | 6092 | 1298.5  | 5155     | 7.616926 | 28.24012 | 1.890466 | Up | 2.50E-12 | 7.36E-12 |
| F11r         | 1895 | 14      | 55.5     | 0.263151 | 0.975207 | 1.889817 | Up | 5.70E-07 | 1.23E-06 |
| Taf5         | 3240 | 216.5   | 859.5    | 2.387443 | 8.840529 | 1.888666 | Up | 2.34E-13 | 8.42E-13 |
| Tesk2        | 3045 | 107     | 426      | 1.257031 | 4.654016 | 1.888456 | Up | 0        | 0        |
| RGD1562462   | 3136 | 318     | 1265     | 3.641695 | 13.48221 | 1.888375 | Up | 1.88E-13 | 6.87E-13 |
| Noc3l        | 2936 | 1122    | 4446     | 13.65083 | 50.52594 | 1.888036 | Up | 2.95E-12 | 8.57E-12 |
| Stam         | 3022 | 2574    | 10204    | 30.46693 | 112.6978 | 1.887144 | Up | 0        | 0        |
| LOC100362059 | 2568 | 47      | 186      | 0.654688 | 2.420307 | 1.886311 | Up | 0        | 0        |
| LOC257642    | 1038 | 58269.5 | 231873.5 | 2012.397 | 7435.518 | 1.885518 | Up | 9.96E-11 | 2.48E-10 |
| LOC502619    | 419  | 7       | 27.5     | 0.590968 | 2.181592 | 1.88423  | Up | 0.000518 | 0.000914 |
| Olr87        | 939  | 7.5     | 29.5     | 0.284893 | 1.05129  | 1.883671 | Up | 0.0002   | 0.000364 |
| Prss12       | 2499 | 57.5    | 228.5    | 0.823917 | 3.03891  | 1.882982 | Up | 5.37E-14 | 2.13E-13 |
| Prpf4b       | 4378 | 2093.5  | 8256     | 17.0586  | 62.91435 | 1.88289  | Up | 0        | 0        |

|              |      |        |        |          |          |          |    |          |          |
|--------------|------|--------|--------|----------|----------|----------|----|----------|----------|
| Gen1         | 4285 | 451    | 1775   | 3.750292 | 13.82476 | 1.88218  | Up | 2.05E-12 | 6.11E-12 |
| LOC100911339 | 1770 | 67.5   | 265.5  | 1.359917 | 5.012852 | 1.882113 | Up | 0        | 0        |
| Gabpb1l      | 1832 | 337    | 1329.5 | 6.567685 | 24.1886  | 1.88087  | Up | 0        | 0        |
| Ngrn         | 1349 | 468    | 1849   | 12.40215 | 45.6734  | 1.880764 | Up | 1.12E-12 | 3.49E-12 |
| RGD1564342   | 3351 | 35.5   | 139    | 0.378141 | 1.391873 | 1.880031 | Up | 3.77E-13 | 1.30E-12 |
| Mtrf1l       | 1264 | 181.5  | 713.5  | 5.109824 | 18.79449 | 1.878965 | Up | 1.41E-13 | 5.30E-13 |
| Dhx36        | 5664 | 1581.5 | 6191   | 9.935546 | 36.49944 | 1.877203 | Up | 5.17E-12 | 1.41E-11 |
| LOC100911809 | 916  | 59     | 233    | 2.302937 | 8.45909  | 1.877027 | Up | 2.53E-14 | 1.03E-13 |
| Nrg1         | 3842 | 645    | 2537   | 6.009724 | 22.04127 | 1.874836 | Up | 5.31E-13 | 1.77E-12 |
| Slc25a25     | 3150 | 590.5  | 2318   | 6.700381 | 24.55474 | 1.873686 | Up | 0        | 0        |
| Semg1        | 1545 | 13.5   | 53     | 0.310628 | 1.138318 | 1.873645 | Up | 7.07E-07 | 1.52E-06 |
| Dkk1         | 2295 | 13.5   | 53     | 0.210615 | 0.771809 | 1.873638 | Up | 7.07E-07 | 1.52E-06 |
| Tmem202      | 1282 | 22.5   | 88     | 0.628245 | 2.300187 | 1.872353 | Up | 9.83E-10 | 2.36E-09 |
| Zfp394       | 2472 | 172.5  | 677    | 2.495966 | 9.133362 | 1.871548 | Up | 1.17E-13 | 4.46E-13 |
| Tra2a        | 1813 | 1794.5 | 7020   | 35.34076 | 129.2536 | 1.870799 | Up | 1.43E-12 | 4.38E-12 |
| LOC100912569 | 930  | 4.5    | 17.5   | 0.172836 | 0.631634 | 1.869681 | Up | 0.004389 | 0.007066 |
| Etv3         | 1598 | 267.5  | 1048   | 5.998789 | 21.90418 | 1.868463 | Up | 7.08E-13 | 2.29E-12 |
| RGD1559505   | 1959 | 137.5  | 537    | 2.50734  | 9.152893 | 1.86807  | Up | 2.87E-13 | 1.02E-12 |
| Abca4        | 7163 | 38     | 148    | 0.189431 | 0.691086 | 1.867191 | Up | 1.45E-13 | 5.43E-13 |
| Adam5        | 2591 | 10.5   | 40.5   | 0.143794 | 0.524128 | 1.865917 | Up | 1.64E-05 | 3.23E-05 |
| LOC503131    | 939  | 7      | 27.5   | 0.267365 | 0.974427 | 1.865742 | Up | 0.000518 | 0.000914 |
| Dsg3         | 2928 | 4.5    | 17.5   | 0.054701 | 0.199084 | 1.863742 | Up | 0.004389 | 0.007066 |
| LOC683508    | 1990 | 82     | 321.5  | 1.483706 | 5.396839 | 1.862909 | Up | 0        | 0        |
| Cish         | 1879 | 287.5  | 1120.5 | 5.470657 | 19.89823 | 1.862854 | Up | 4.35E-13 | 1.48E-12 |
| Ccnt1        | 1992 | 421.5  | 1645   | 7.584701 | 27.58449 | 1.862693 | Up | 4.13E-13 | 1.41E-12 |

|              |      |        |        |          |          |          |    |          |          |
|--------------|------|--------|--------|----------|----------|----------|----|----------|----------|
| Bc1          | 152  | 326.5  | 1277.5 | 76.9633  | 279.8895 | 1.862615 | Up | 6.55E-13 | 2.14E-12 |
| RGD1308782   | 1657 | 47     | 182.5  | 1.012205 | 3.678541 | 1.861632 | Up | 0        | 0        |
| Nt5e         | 2826 | 975    | 3795.5 | 12.3113  | 44.72933 | 1.861238 | Up | 1.67E-12 | 5.06E-12 |
| LOC100909815 | 1451 | 8      | 31     | 0.197289 | 0.716397 | 1.86045  | Up | 0.000187 | 0.000341 |
| Dusp16       | 1986 | 387    | 1504   | 6.968535 | 25.29837 | 1.860117 | Up | 7.51E-13 | 2.41E-12 |
| Cfi          | 2021 | 17     | 66     | 0.300997 | 1.091652 | 1.858693 | Up | 5.63E-08 | 1.27E-07 |
| Hps4         | 2372 | 411.5  | 1601.5 | 6.218515 | 22.53699 | 1.857652 | Up | 0        | 0        |
| Fst          | 1035 | 1138.5 | 4406.5 | 39.25823 | 142.1687 | 1.856537 | Up | 1.82E-12 | 5.49E-12 |
| LOC100911964 | 480  | 23.5   | 90.5   | 1.747706 | 6.325744 | 1.855772 | Up | 5.61E-10 | 1.36E-09 |
| Zfp143       | 3040 | 681    | 2641.5 | 8.019876 | 29.02701 | 1.855744 | Up | 1.16E-13 | 4.45E-13 |
| Mthfr        | 2104 | 63     | 244.5  | 1.073909 | 3.886419 | 1.85557  | Up | 0        | 0        |
| Zkscan5      | 3782 | 636.5  | 2467.5 | 6.020626 | 21.77229 | 1.854508 | Up | 1.16E-12 | 3.60E-12 |
| 3-Mar        | 1799 | 261    | 1007   | 5.166909 | 18.68195 | 1.854271 | Up | 2.23E-13 | 8.05E-13 |
| Aipl1        | 1446 | 16.5   | 64     | 0.40891  | 1.477701 | 1.8535   | Up | 7.66E-08 | 1.71E-07 |
| Ifit1lb      | 2187 | 57     | 219.5  | 0.927116 | 3.349454 | 1.853104 | Up | 5.37E-14 | 2.13E-13 |
| Tex10        | 3893 | 1206.5 | 4663.5 | 11.06274 | 39.94789 | 1.852411 | Up | 4.33E-12 | 1.21E-11 |
| Bod1         | 1474 | 386.5  | 1493.5 | 9.37714  | 33.85506 | 1.852151 | Up | 1.55E-13 | 5.74E-13 |
| Sat1         | 1193 | 2458   | 9471   | 73.41459 | 265.0199 | 1.851962 | Up | 0        | 0        |
| Mios         | 3744 | 442    | 1707   | 4.216139 | 15.21963 | 1.851939 | Up | 0        | 0        |
| Ppwd1        | 2453 | 713    | 2754.5 | 10.38081 | 37.46491 | 1.851621 | Up | 1.46E-12 | 4.49E-12 |
| LOC691468    | 3615 | 170    | 656.5  | 1.681166 | 6.066803 | 1.851474 | Up | 3.78E-13 | 1.30E-12 |
| Gabarapl2    | 1619 | 1175.5 | 4529.5 | 25.86356 | 93.31644 | 1.851211 | Up | 5.04E-12 | 1.38E-11 |
| LOC680097    | 430  | 28.5   | 111    | 2.37768  | 8.578687 | 1.851202 | Up | 1.98E-11 | 5.08E-11 |
| Ppif         | 1498 | 267    | 1030   | 6.359545 | 22.9448  | 1.851172 | Up | 7.08E-13 | 2.29E-12 |
| Cebpδ        | 1139 | 727.5  | 2825   | 22.93822 | 82.68423 | 1.849859 | Up | 1.35E-12 | 4.15E-12 |

|              |      |        |        |          |          |          |    |          |          |
|--------------|------|--------|--------|----------|----------|----------|----|----------|----------|
| Kdm4c        | 4126 | 599.5  | 2309.5 | 5.189438 | 18.70603 | 1.849853 | Up | 7.53E-13 | 2.42E-12 |
| Runx1        | 2006 | 2986   | 11573  | 53.45067 | 192.6163 | 1.84945  | Up | 0        | 0        |
| LOC100911647 | 754  | 121    | 461.5  | 5.654181 | 20.36998 | 1.849054 | Up | 0        | 0        |
| LOC100911856 | 378  | 80     | 302.5  | 7.454843 | 26.83614 | 1.847927 | Up | 0        | 0        |
| Aste1        | 2424 | 66     | 254.5  | 0.973823 | 3.503669 | 1.847135 | Up | 0        | 0        |
| LOC691113    | 501  | 43     | 166    | 3.074649 | 11.0605  | 1.846923 | Up | 1.18E-13 | 4.48E-13 |
| Avil         | 3014 | 56     | 215.5  | 0.664471 | 2.390281 | 1.846903 | Up | 1.58E-14 | 6.49E-14 |
| Mia          | 588  | 69     | 265    | 4.183449 | 15.033   | 1.845368 | Up | 0        | 0        |
| Wdr96        | 5208 | 65     | 250.5  | 0.446934 | 1.605616 | 1.844994 | Up | 0        | 0        |
| Rgs2         | 685  | 49     | 189    | 2.561351 | 9.198696 | 1.844525 | Up | 3.91E-14 | 1.57E-13 |
| RGD1307887   | 2071 | 5      | 19     | 0.086114 | 0.308474 | 1.840824 | Up | 0.004105 | 0.006627 |
| Aldh1l1      | 3109 | 4.5    | 17.5   | 0.051701 | 0.185178 | 1.840655 | Up | 0.004389 | 0.007069 |
| Irak3        | 2972 | 669.5  | 2569.5 | 8.067323 | 28.88414 | 1.840116 | Up | 1.58E-12 | 4.82E-12 |
| Eif1b        | 882  | 1027.5 | 3939   | 41.65602 | 149.0918 | 1.839604 | Up | 0        | 0        |
| RGD1559150   | 2613 | 54     | 207.5  | 0.741687 | 2.654196 | 1.839392 | Up | 3.66E-14 | 1.48E-13 |
| Sdc4         | 2488 | 4790   | 18326  | 68.742   | 245.9603 | 1.839162 | Up | 2.40E-11 | 6.13E-11 |
| Scn2a1       | 8553 | 170    | 650.5  | 0.711364 | 2.544133 | 1.838514 | Up | 3.78E-13 | 1.30E-12 |
| Churc1       | 535  | 447.5  | 1707.5 | 29.7588  | 106.4014 | 1.838128 | Up | 8.15E-13 | 2.61E-12 |
| Pp2d1        | 2461 | 83.5   | 317    | 1.201168 | 4.293953 | 1.837869 | Up | 1.43E-13 | 5.34E-13 |
| Wdr31        | 1350 | 135.5  | 518    | 3.584143 | 12.81198 | 1.837793 | Up | 2.15E-13 | 7.78E-13 |
| Ttc25        | 2215 | 31     | 118.5  | 0.500545 | 1.789204 | 1.837747 | Up | 3.32E-12 | 9.51E-12 |
| Thap6        | 796  | 108.5  | 418    | 4.895859 | 17.49948 | 1.837678 | Up | 0        | 0        |
| Nhej1        | 1445 | 68     | 261.5  | 1.687885 | 6.029827 | 1.8369   | Up | 0        | 0        |
| Wfikkn1      | 1659 | 41     | 157.5  | 0.886755 | 3.167735 | 1.836844 | Up | 1.47E-13 | 5.48E-13 |
| Pthlh        | 1087 | 27.5   | 105    | 0.903961 | 3.227521 | 1.836094 | Up | 3.93E-11 | 9.88E-11 |



|              |      |        |        |          |          |          |    |          |          |
|--------------|------|--------|--------|----------|----------|----------|----|----------|----------|
| Faslg        | 1623 | 15     | 57     | 0.329654 | 1.176986 | 1.836074 | Up | 4.84E-07 | 1.05E-06 |
| Ebfl         | 2895 | 46.5   | 178.5  | 0.577233 | 2.059342 | 1.834959 | Up | 7.84E-14 | 3.07E-13 |
| Boc          | 4430 | 21     | 81     | 0.170533 | 0.608224 | 1.83455  | Up | 2.75E-09 | 6.51E-09 |
| Stk17b       | 2159 | 1814.5 | 6921.5 | 30.00457 | 106.9798 | 1.834084 | Up | 2.11E-12 | 6.30E-12 |
| Wdr37        | 4354 | 508    | 1936   | 4.161814 | 14.83775 | 1.833988 | Up | 7.72E-13 | 2.48E-12 |
| Tert         | 3378 | 34.5   | 132    | 0.365035 | 1.300905 | 1.83341  | Up | 6.04E-13 | 1.99E-12 |
| Nabl         | 3127 | 9      | 34     | 0.101706 | 0.362441 | 1.833338 | Up | 0.000109 | 0.000203 |
| LOC100910810 | 1349 | 15     | 57     | 0.398311 | 1.419384 | 1.833296 | Up | 4.84E-07 | 1.05E-06 |
| Fermt3       | 2511 | 17.5   | 66.5   | 0.249728 | 0.889754 | 1.83305  | Up | 5.63E-08 | 1.27E-07 |
| Serpina3n    | 2061 | 11     | 42     | 0.191261 | 0.681245 | 1.832631 | Up | 1.49E-05 | 2.96E-05 |
| Atg12        | 2590 | 1138   | 4330.5 | 15.66385 | 55.78808 | 1.832519 | Up | 1.82E-12 | 5.48E-12 |
| RGD1566052   | 1531 | 369    | 1407   | 8.616197 | 30.64568 | 1.830561 | Up | 0        | 0        |
| Ripk2        | 2582 | 1144.5 | 4365.5 | 15.86009 | 56.40584 | 1.830443 | Up | 2.98E-12 | 8.63E-12 |
| Gtf2a2       | 330  | 141.5  | 536    | 15.2157  | 54.11373 | 1.830434 | Up | 0        | 0        |
| Bdnf         | 3751 | 898    | 3417.5 | 8.548721 | 30.38517 | 1.829587 | Up | 2.45E-12 | 7.21E-12 |
| Pex13        | 4972 | 768.5  | 2926.5 | 5.523763 | 19.63243 | 1.829516 | Up | 0        | 0        |
| Odf1         | 969  | 5.5    | 21     | 0.2034   | 0.722624 | 1.828927 | Up | 0.001541 | 0.002584 |
| Tfb2m        | 2092 | 626    | 2373.5 | 10.661   | 37.87139 | 1.828765 | Up | 0        | 0        |
| Nfkbia       | 1583 | 2376   | 9054   | 53.71854 | 190.8224 | 1.828738 | Up | 0        | 0        |
| RGD1565192   | 922  | 294    | 1113   | 11.3487  | 40.31098 | 1.828646 | Up | 0        | 0        |
| Nphs1        | 5820 | 76     | 289    | 0.466878 | 1.657404 | 1.827806 | Up | 0        | 0        |
| RGD1566036   | 3167 | 488.5  | 1854   | 5.505602 | 19.53851 | 1.827348 | Up | 1.35E-12 | 4.17E-12 |
| Tnfrsf22     | 977  | 1824.5 | 6957   | 66.91413 | 237.3734 | 1.826776 | Up | 1.08E-12 | 3.37E-12 |
| RGD1564680   | 4022 | 5      | 19     | 0.044057 | 0.156153 | 1.825533 | Up | 0.004105 | 0.006626 |
| Fam173b      | 1378 | 249.5  | 944    | 6.460793 | 22.88995 | 1.824931 | Up | 1.13E-14 | 4.70E-14 |

|              |      |        |        |          |          |          |    |          |          |
|--------------|------|--------|--------|----------|----------|----------|----|----------|----------|
| Tubb4a       | 2086 | 5      | 19     | 0.085495 | 0.302804 | 1.824471 | Up | 0.004105 | 0.006627 |
| Ndrp1        | 2906 | 1069.5 | 4057.5 | 13.15328 | 46.5827  | 1.824372 | Up | 2.20E-12 | 6.53E-12 |
| Actl7a       | 1507 | 21     | 79     | 0.495975 | 1.75558  | 1.823609 | Up | 4.41E-09 | 1.04E-08 |
| Polg2        | 1872 | 91     | 344    | 1.734255 | 6.135183 | 1.82279  | Up | 0        | 0        |
| Zdhhc17      | 2904 | 479    | 1806.5 | 5.873827 | 20.77136 | 1.822223 | Up | 0        | 0        |
| Lrig2        | 4609 | 431    | 1630   | 3.340588 | 11.80373 | 1.821069 | Up | 0        | 0        |
| Cdc40        | 3105 | 634.5  | 2398.5 | 7.295328 | 25.7572  | 1.819931 | Up | 6.54E-13 | 2.14E-12 |
| Ptprv        | 5446 | 155    | 586.5  | 1.018962 | 3.591832 | 1.817619 | Up | 3.73E-13 | 1.29E-12 |
| Sh3bp2       | 2877 | 69.5   | 263    | 0.866911 | 3.055173 | 1.817298 | Up | 0        | 0        |
| Mob4         | 2513 | 1810.5 | 6799.5 | 25.60913 | 90.24921 | 1.817256 | Up | 3.85E-12 | 1.09E-11 |
| LOC100912071 | 2598 | 9      | 34     | 0.124181 | 0.437626 | 1.817252 | Up | 0.000109 | 0.000203 |
| Rufy4        | 1844 | 9.5    | 35.5   | 0.184505 | 0.649828 | 1.816396 | Up | 6.87E-05 | 0.00013  |
| Pri2a1       | 1014 | 16     | 60     | 0.559537 | 1.969338 | 1.815404 | Up | 2.82E-07 | 6.15E-07 |
| RGD1560859   | 1023 | 4.5    | 17     | 0.158245 | 0.556575 | 1.814415 | Up | 0.004389 | 0.007068 |
| Ccdc77       | 2441 | 354.5  | 1334   | 5.182022 | 18.22147 | 1.814052 | Up | 0        | 0        |
| Epsti1       | 1582 | 12.5   | 47     | 0.282194 | 0.991896 | 1.813504 | Up | 3.66E-06 | 7.55E-06 |
| Ptpn18       | 1362 | 6      | 23     | 0.157635 | 0.553889 | 1.813004 | Up | 0.001447 | 0.00243  |
| Tuba3a       | 1534 | 8.5    | 32     | 0.197717 | 0.694705 | 1.812967 | Up | 0.000117 | 0.000216 |
| Tspan5       | 2877 | 1365   | 5122.5 | 16.95831 | 59.46322 | 1.810005 | Up | 1.70E-12 | 5.14E-12 |
| LOC100912606 | 1032 | 10.5   | 40     | 0.367685 | 1.287085 | 1.807564 | Up | 1.64E-05 | 3.23E-05 |
| Fbxo32       | 1053 | 31     | 116    | 1.051814 | 3.679649 | 1.806689 | Up | 3.67E-12 | 1.04E-11 |
| Ric8b        | 1760 | 374.5  | 1401   | 7.600907 | 26.5874  | 1.806499 | Up | 4.81E-13 | 1.62E-12 |
| Malt1        | 3729 | 251.5  | 940    | 2.407303 | 8.418263 | 1.806105 | Up | 1.37E-13 | 5.16E-13 |
| LOC100359662 | 1209 | 164    | 616    | 4.856816 | 16.9812  | 1.805856 | Up | 1.50E-13 | 5.56E-13 |
| Fam107a      | 2875 | 145.5  | 540.5  | 1.797479 | 6.282199 | 1.805294 | Up | 3.55E-15 | 1.49E-14 |

|              |      |        |        |          |          |          |    |          |          |
|--------------|------|--------|--------|----------|----------|----------|----|----------|----------|
| Eri2         | 3451 | 482    | 1802   | 4.982046 | 17.40977 | 1.805087 | Up | 1.31E-14 | 5.41E-14 |
| Oas1b        | 1878 | 70     | 263    | 1.338048 | 4.672221 | 1.803979 | Up | 0        | 0        |
| Doc2a        | 1447 | 14.5   | 54.5   | 0.360754 | 1.259662 | 1.80395  | Up | 8.32E-07 | 1.78E-06 |
| Rasa12       | 3700 | 491    | 1837.5 | 4.750547 | 16.58657 | 1.80385  | Up | 5.39E-13 | 1.79E-12 |
| LOC100912165 | 403  | 43.5   | 162    | 3.858901 | 13.47237 | 1.803742 | Up | 1.18E-13 | 4.49E-13 |
| Slc25a46     | 2947 | 978.5  | 3648   | 11.83168 | 41.2891  | 1.803106 | Up | 2.73E-12 | 7.98E-12 |
| Ubp1         | 2662 | 1299.5 | 4855.5 | 17.439   | 60.84242 | 1.80276  | Up | 4.18E-12 | 1.17E-11 |
| LOC100911629 | 774  | 22     | 82     | 1.014872 | 3.53943  | 1.802219 | Up | 2.51E-09 | 5.94E-09 |
| LOC100911357 | 1555 | 81.5   | 304    | 1.87269  | 6.528226 | 1.801579 | Up | 5.82E-14 | 2.30E-13 |
| Rab21        | 1515 | 1867.5 | 6950.5 | 43.94155 | 153.1511 | 1.801299 | Up | 3.53E-12 | 1.01E-11 |
| RGD1561589   | 876  | 48     | 178    | 1.942396 | 6.769694 | 1.801253 | Up | 1.06E-13 | 4.07E-13 |
| Ccl24        | 1485 | 53.5   | 197.5  | 1.276224 | 4.446091 | 1.800656 | Up | 4.04E-14 | 1.62E-13 |
| Slc35g3      | 1347 | 20     | 75.5   | 0.533857 | 1.859654 | 1.800509 | Up | 1.05E-08 | 2.44E-08 |
| Trpm1        | 5030 | 136    | 506.5  | 0.964991 | 3.360928 | 1.800273 | Up | 1.95E-13 | 7.10E-13 |
| Narg2        | 3155 | 507.5  | 1887.5 | 5.738582 | 19.96975 | 1.79905  | Up | 9.98E-13 | 3.15E-12 |
| Fhl4         | 1626 | 48     | 177.5  | 1.050689 | 3.655972 | 1.798919 | Up | 1.06E-13 | 4.07E-13 |
| RGD1304978   | 2026 | 82.5   | 307.5  | 1.456974 | 5.068457 | 1.798571 | Up | 0        | 0        |
| Mettl17      | 1609 | 217    | 811.5  | 4.839854 | 16.83166 | 1.798142 | Up | 2.24E-13 | 8.08E-13 |
| Ces2h        | 2065 | 16     | 59     | 0.274478 | 0.954345 | 1.797819 | Up | 4.25E-07 | 9.23E-07 |
| Ecscr-ps1    | 657  | 5      | 19     | 0.274941 | 0.955935 | 1.797788 | Up | 0.004105 | 0.006628 |
| Stmn3        | 1123 | 7      | 26     | 0.223048 | 0.774583 | 1.796068 | Up | 0.000831 | 0.001423 |
| LOC680700    | 657  | 64.5   | 239.5  | 3.50642  | 12.15767 | 1.793797 | Up | 0        | 0        |
| RGD1306820   | 5203 | 562    | 2079.5 | 3.850674 | 13.34632 | 1.79326  | Up | 3.62E-13 | 1.25E-12 |
| Gipc2        | 1376 | 115    | 424    | 2.972268 | 10.30022 | 1.79304  | Up | 0        | 0        |
| Tfb1m        | 1660 | 409.5  | 1518   | 8.808423 | 30.51457 | 1.792542 | Up | 4.45E-13 | 1.51E-12 |

|              |      |        |        |          |          |          |    |          |          |
|--------------|------|--------|--------|----------|----------|----------|----|----------|----------|
| Tmem8c       | 1418 | 17     | 63     | 0.426569 | 1.477623 | 1.792428 | Up | 1.64E-07 | 3.62E-07 |
| Arl13b       | 3535 | 512    | 1895.5 | 5.165067 | 17.88793 | 1.792128 | Up | 3.68E-13 | 1.28E-12 |
| Mphosph10    | 2191 | 1999.5 | 7408   | 32.59273 | 112.872  | 1.792065 | Up | 0        | 0        |
| Zmym6        | 4134 | 146    | 542.5  | 1.263475 | 4.374237 | 1.791634 | Up | 3.33E-14 | 1.35E-13 |
| Terf2        | 1982 | 551    | 2046   | 9.953887 | 34.45717 | 1.791472 | Up | 7.88E-14 | 3.09E-13 |
| LOC682206    | 5649 | 159.5  | 590.5  | 1.006942 | 3.485601 | 1.791427 | Up | 8.53E-14 | 3.32E-13 |
| Ptges        | 1254 | 11     | 40.5   | 0.312973 | 1.082947 | 1.790851 | Up | 3.68E-05 | 7.12E-05 |
| Zufsp        | 2016 | 348.5  | 1289.5 | 6.164836 | 21.33142 | 1.790846 | Up | 4.24E-14 | 1.70E-13 |
| Blnk         | 1765 | 40.5   | 149.5  | 0.820601 | 2.836362 | 1.789289 | Up | 1.16E-13 | 4.44E-13 |
| Clec12a      | 1441 | 11     | 40     | 0.268777 | 0.928642 | 1.788712 | Up | 3.68E-05 | 7.12E-05 |
| Zfp709       | 2768 | 237.5  | 880.5  | 3.070377 | 10.60522 | 1.788286 | Up | 2.75E-13 | 9.80E-13 |
| LOC689207    | 3054 | 11     | 41     | 0.1302   | 0.449692 | 1.788212 | Up | 2.34E-05 | 4.59E-05 |
| Filip1l      | 4823 | 916    | 3392   | 6.799636 | 23.47729 | 1.787736 | Up | 0        | 0        |
| Tnnc2        | 483  | 17.5   | 65     | 1.303024 | 4.498639 | 1.787625 | Up | 7.74E-08 | 1.73E-07 |
| Rad51b       | 1535 | 39.5   | 146    | 0.918752 | 3.171449 | 1.787395 | Up | 1.33E-13 | 5.00E-13 |
| Tsc22d2      | 4606 | 1088   | 4027   | 8.456098 | 29.1561  | 1.785734 | Up | 2.48E-12 | 7.29E-12 |
| Fmo4         | 1640 | 34     | 125.5  | 0.741148 | 2.55518  | 1.785591 | Up | 7.24E-13 | 2.33E-12 |
| Rnaseh1      | 1375 | 206.5  | 763.5  | 5.370446 | 18.51489 | 1.785572 | Up | 2.46E-13 | 8.83E-13 |
| LOC690358    | 3674 | 13     | 48     | 0.127395 | 0.439131 | 1.785343 | Up | 5.08E-06 | 1.04E-05 |
| Msh5         | 2679 | 127.5  | 471.5  | 1.705257 | 5.877877 | 1.785306 | Up | 9.17E-14 | 3.56E-13 |
| LOC100910444 | 2129 | 75.5   | 278    | 1.268026 | 4.368029 | 1.784398 | Up | 0        | 0        |
| RGD1560234   | 1104 | 21     | 77.5   | 0.67962  | 2.340877 | 1.784248 | Up | 8.56E-09 | 1.99E-08 |
| Mettl22      | 1816 | 176    | 653.5  | 3.478083 | 11.97904 | 1.784147 | Up | 0        | 0        |
| Itpkc        | 3309 | 240.5  | 890    | 2.604298 | 8.96732  | 1.783782 | Up | 0        | 0        |
| Lace1        | 2045 | 108    | 398.5  | 1.885569 | 6.491635 | 1.783582 | Up | 0        | 0        |

|              |      |       |        |          |          |          |    |          |          |
|--------------|------|-------|--------|----------|----------|----------|----|----------|----------|
| LOC100361710 | 4037 | 161   | 590    | 1.419262 | 4.883433 | 1.782755 | Up | 0        | 0        |
| Crbn         | 2257 | 838.5 | 3083   | 13.25994 | 45.62421 | 1.782725 | Up | 0        | 0        |
| Pcdh9        | 5595 | 345.5 | 1270   | 2.205417 | 7.57874  | 1.780906 | Up | 9.33E-13 | 2.96E-12 |
| Cenpq        | 1470 | 470   | 1726   | 11.41905 | 39.22499 | 1.78033  | Up | 1.65E-12 | 5.01E-12 |
| Tm2d1        | 1422 | 497.5 | 1824.5 | 12.47494 | 42.84556 | 1.780113 | Up | 3.54E-13 | 1.23E-12 |
| Car5a        | 1200 | 29.5  | 109    | 0.880866 | 3.025135 | 1.780005 | Up | 1.30E-11 | 3.40E-11 |
| LOC691543    | 1275 | 860.5 | 3142   | 23.97634 | 82.32429 | 1.779706 | Up | 1.10E-12 | 3.45E-12 |
| LOC100365187 | 1572 | 25    | 92     | 0.570166 | 1.957371 | 1.779463 | Up | 3.43E-10 | 8.35E-10 |
| Swf1         | 3679 | 331.5 | 1215.5 | 3.214698 | 11.03099 | 1.778807 | Up | 0        | 0        |
| Scyl3        | 2966 | 307.5 | 1128.5 | 3.707603 | 12.70859 | 1.777245 | Up | 4.91E-14 | 1.95E-13 |
| Scn9a        | 9316 | 6     | 22     | 0.023293 | 0.07981  | 1.776703 | Up | 0.002332 | 0.003849 |
| Mier3        | 4758 | 604   | 2216   | 4.536685 | 15.53507 | 1.775818 | Up | 6.80E-13 | 2.21E-12 |
| Ppef2        | 3095 | 7.5   | 27.5   | 0.08662  | 0.296506 | 1.775299 | Up | 0.000518 | 0.000914 |
| Luc7l        | 1743 | 787   | 2875   | 16.09994 | 55.08966 | 1.774726 | Up | 1.26E-12 | 3.90E-12 |
| Fam108b1     | 1623 | 289.5 | 1053.5 | 6.334548 | 21.67243 | 1.774547 | Up | 0        | 0        |
| Vsx2         | 3087 | 12.5  | 46     | 0.145173 | 0.495754 | 1.771847 | Up | 5.61E-06 | 1.14E-05 |
| LOC680693    | 1099 | 6     | 22     | 0.194315 | 0.66343  | 1.771545 | Up | 0.002332 | 0.003849 |
| Zbtb17       | 2795 | 741   | 2714   | 9.500669 | 32.42923 | 1.771194 | Up | 0        | 0        |
| RGD1311344   | 2453 | 40    | 145.5  | 0.580229 | 1.980526 | 1.77119  | Up | 1.18E-13 | 4.48E-13 |
| Mdm4         | 1923 | 705.5 | 2571.5 | 13.07652 | 44.63028 | 1.771044 | Up | 0        | 0        |
| Krt7         | 2061 | 66.5  | 243    | 1.154995 | 3.939493 | 1.770123 | Up | 0        | 0        |
| RGD1563120   | 1422 | 89    | 325.5  | 2.24363  | 7.636327 | 1.767044 | Up | 0        | 0        |
| Lrrc14b      | 2575 | 21    | 76     | 0.288929 | 0.9833   | 1.766915 | Up | 1.26E-08 | 2.90E-08 |
| Msrb2        | 1168 | 22    | 79.5   | 0.669581 | 2.278255 | 1.766599 | Up | 7.31E-09 | 1.70E-08 |
| Cspp1        | 4232 | 708   | 2583   | 5.990214 | 20.37912 | 1.766412 | Up | 1.11E-12 | 3.47E-12 |

|              |      |       |        |          |          |          |    |          |          |
|--------------|------|-------|--------|----------|----------|----------|----|----------|----------|
| Pole4        | 1741 | 871   | 3160.5 | 17.78628 | 60.48964 | 1.765923 | Up | 0        | 0        |
| LOC100912383 | 1195 | 2151  | 7809   | 64.24139 | 218.1783 | 1.763932 | Up | 0        | 0        |
| Tlll11       | 2334 | 12    | 44     | 0.184467 | 0.626315 | 1.763527 | Up | 1.36E-05 | 2.71E-05 |
| Cnksr1       | 2512 | 50    | 182    | 0.711789 | 2.416083 | 1.763148 | Up | 3.62E-14 | 1.46E-13 |
| Lrrc4c       | 4014 | 12    | 44     | 0.107118 | 0.363508 | 1.762782 | Up | 1.36E-05 | 2.71E-05 |
| Hoxc5        | 2734 | 14    | 51     | 0.183655 | 0.623126 | 1.762528 | Up | 2.96E-06 | 6.13E-06 |
| Trim29       | 2832 | 8     | 29     | 0.100678 | 0.341567 | 1.762425 | Up | 0.000477 | 0.000847 |
| Mcart1       | 2243 | 1138  | 4147.5 | 18.17044 | 61.61892 | 1.76178  | Up | 1.82E-12 | 5.49E-12 |
| Fmc1         | 1367 | 106.5 | 385.5  | 2.775419 | 9.410948 | 1.761634 | Up | 0        | 0        |
| Clec2g       | 624  | 73.5  | 266.5  | 4.218068 | 14.30006 | 1.761367 | Up | 0        | 0        |
| LOC100912349 | 659  | 16    | 58     | 0.867919 | 2.939811 | 1.760092 | Up | 6.52E-07 | 1.40E-06 |
| Rg9mtd1      | 2651 | 616.5 | 2227   | 8.277074 | 28.02894 | 1.759725 | Up | 5.19E-13 | 1.74E-12 |
| Atp13a3      | 790  | 94.5  | 341    | 4.261164 | 14.42494 | 1.759246 | Up | 0        | 0        |
| Hic2         | 4509 | 90.5  | 328    | 0.717505 | 2.428471 | 1.758988 | Up | 0        | 0        |
| Raly1        | 1513 | 25    | 90.5   | 0.590505 | 1.998517 | 1.758909 | Up | 6.61E-10 | 1.60E-09 |
| Slc30a3      | 1690 | 17    | 61.5   | 0.35995  | 1.216828 | 1.757258 | Up | 3.80E-07 | 8.26E-07 |
| LOC100909963 | 563  | 9.5   | 34.5   | 0.602275 | 2.035515 | 1.7569   | Up | 0.000109 | 0.000203 |
| LOC100361898 | 1246 | 107   | 386.5  | 3.067355 | 10.36609 | 1.756805 | Up | 0        | 0        |
| LOC100911275 | 1650 | 18    | 65     | 0.389667 | 1.316874 | 1.756802 | Up | 1.45E-07 | 3.20E-07 |
| Dnajc12      | 1220 | 248   | 892.5  | 7.243887 | 24.45572 | 1.755336 | Up | 7.11E-14 | 2.79E-13 |
| Rgs8         | 3661 | 11.5  | 41.5   | 0.112638 | 0.379815 | 1.753605 | Up | 2.34E-05 | 4.59E-05 |
| Ns5atp9      | 333  | 1218  | 4384.5 | 130.4179 | 439.1619 | 1.751611 | Up | 4.65E-12 | 1.29E-11 |
| Dzip3        | 5778 | 395   | 1421.5 | 2.437904 | 8.205937 | 1.751027 | Up | 5.15E-14 | 2.05E-13 |
| Med21        | 791  | 561.5 | 2018.5 | 25.30724 | 85.13215 | 1.750154 | Up | 0        | 0        |
| Itgb1bp2     | 1493 | 12    | 43.5   | 0.288376 | 0.970044 | 1.750099 | Up | 2.14E-05 | 4.20E-05 |

|              |       |         |          |          |          |          |    |          |          |
|--------------|-------|---------|----------|----------|----------|----------|----|----------|----------|
| Arc          | 3032  | 45      | 162.5    | 0.533164 | 1.793373 | 1.750024 | Up | 2.49E-14 | 1.02E-13 |
| RGD1562161   | 2723  | 553     | 1990     | 7.252922 | 24.39352 | 1.749864 | Up | 6.00E-13 | 1.97E-12 |
| Ifi27l2b     | 452   | 132.5   | 473      | 10.41661 | 35.02757 | 1.749606 | Up | 1.14E-13 | 4.37E-13 |
| Srsf11       | 2654  | 2811    | 10112.5  | 37.81727 | 127.1341 | 1.749234 | Up | 0        | 0        |
| LOC500066    | 2303  | 11      | 39.5     | 0.170167 | 0.571658 | 1.748199 | Up | 5.79E-05 | 0.00011  |
| Zbtb37       | 1775  | 17      | 61       | 0.341097 | 1.144842 | 1.746894 | Up | 3.80E-07 | 8.26E-07 |
| RGD1563273   | 2355  | 27      | 97.5     | 0.409523 | 1.37404  | 1.746407 | Up | 1.54E-10 | 3.80E-10 |
| Chrb2        | 2197  | 28      | 100.5    | 0.456567 | 1.531554 | 1.746099 | Up | 8.90E-11 | 2.22E-10 |
| Zfp472       | 2113  | 104.5   | 373      | 1.758424 | 5.894501 | 1.745087 | Up | 0        | 0        |
| Glb1l2       | 2436  | 515     | 1849     | 7.558184 | 25.33498 | 1.745019 | Up | 9.85E-13 | 3.11E-12 |
| Eif1         | 1074  | 7316    | 26182    | 242.872  | 813.8903 | 1.744638 | Up | 3.22E-11 | 8.16E-11 |
| Mnat1        | 1334  | 1105.5  | 3964.5   | 29.60043 | 99.17568 | 1.744368 | Up | 4.00E-12 | 1.13E-11 |
| Tph1         | 3897  | 10      | 36       | 0.091528 | 0.306576 | 1.743954 | Up | 0.0001   | 0.000187 |
| Clcf1        | 1891  | 798     | 2860     | 15.0738  | 50.48418 | 1.743788 | Up | 1.74E-12 | 5.25E-12 |
| Bsn          | 15951 | 18.5    | 66       | 0.041376 | 0.138539 | 1.743435 | Up | 9.55E-08 | 2.13E-07 |
| Csnk1g1      | 1648  | 160     | 575      | 3.478972 | 11.64236 | 1.742651 | Up | 8.90E-14 | 3.46E-13 |
| LOC100912429 | 2318  | 335     | 1197     | 5.156096 | 17.24888 | 1.742152 | Up | 1.62E-13 | 6.00E-13 |
| LOC100911807 | 1781  | 86.5    | 309.5    | 1.733259 | 5.798129 | 1.7421   | Up | 0        | 0        |
| Camta1       | 599   | 43.5    | 156      | 2.587606 | 8.649986 | 1.74108  | Up | 1.18E-13 | 4.49E-13 |
| Zfp958       | 3217  | 197     | 703      | 2.177539 | 7.277441 | 1.740733 | Up | 0        | 0        |
| Enc1         | 4545  | 3124    | 11159    | 24.5403  | 81.98087 | 1.740134 | Up | 0        | 0        |
| Ccdc130      | 1590  | 319     | 1144     | 7.192496 | 24.02284 | 1.739842 | Up | 0        | 0        |
| Mss51        | 1589  | 28.5    | 101.5    | 0.636929 | 2.127257 | 1.739789 | Up | 6.36E-11 | 1.59E-10 |
| Trim6        | 2452  | 10      | 36       | 0.146403 | 0.488713 | 1.739047 | Up | 0.0001   | 0.000187 |
| LOC100909555 | 2078  | 63623.5 | 228348.5 | 1096.934 | 3661.435 | 1.738933 | Up | 0        | 0        |

|            |      |        |         |          |          |          |    |          |          |
|------------|------|--------|---------|----------|----------|----------|----|----------|----------|
| Chdh       | 3435 | 6.5    | 23.5    | 0.068797 | 0.22959  | 1.738636 | Up | 0.001447 | 0.00243  |
| Creb1      | 1125 | 317.5  | 1134.5  | 10.08634 | 33.65794 | 1.738545 | Up | 2.57E-13 | 9.19E-13 |
| Hist1h4b   | 1296 | 399.5  | 1433    | 11.05275 | 36.8814  | 1.738489 | Up | 0        | 0        |
| Olr812     | 933  | 24.5   | 88.5    | 0.94487  | 3.150999 | 1.737622 | Up | 8.15E-10 | 1.96E-09 |
| Ly96       | 492  | 89     | 318.5   | 6.488135 | 21.60864 | 1.735732 | Up | 0        | 0        |
| P2rx1      | 1119 | 10.5   | 37      | 0.332437 | 1.10716  | 1.735713 | Up | 6.33E-05 | 0.00012  |
| Tmem126b   | 870  | 243.5  | 863     | 9.939723 | 33.09749 | 1.735444 | Up | 0        | 0        |
| Chchd4     | 1367 | 161.5  | 575.5   | 4.213866 | 14.02572 | 1.734858 | Up | 0        | 0        |
| RGD1359158 | 1372 | 347.5  | 1236    | 9.036215 | 30.06224 | 1.734162 | Up | 1.58E-13 | 5.85E-13 |
| Nrtn       | 671  | 8      | 29      | 0.431753 | 1.43624  | 1.734018 | Up | 0.000477 | 0.000847 |
| Srek1      | 1485 | 1212.5 | 4321.5  | 29.23375 | 97.20778 | 1.733437 | Up | 5.07E-12 | 1.39E-11 |
| Bbs5       | 1393 | 152.5  | 543.5   | 3.912669 | 13.00149 | 1.732452 | Up | 1.08E-13 | 4.15E-13 |
| RGD1310257 | 3336 | 211.5  | 754     | 2.273186 | 7.553344 | 1.7324   | Up | 2.52E-13 | 9.04E-13 |
| RGD1307465 | 2065 | 233.5  | 831     | 4.042442 | 13.42554 | 1.731681 | Up | 0        | 0        |
| Fam118b    | 1595 | 353.5  | 1253    | 7.897386 | 26.22519 | 1.731506 | Up | 0        | 0        |
| Zfp192     | 8811 | 199    | 707     | 0.80538  | 2.674177 | 1.731353 | Up | 3.57E-14 | 1.45E-13 |
| LOC360479  | 1978 | 7      | 25      | 0.126634 | 0.420157 | 1.73026  | Up | 0.001328 | 0.002237 |
| Kdm3a      | 4505 | 2399.5 | 8515    | 19.0257  | 63.12393 | 1.730238 | Up | 0        | 0        |
| Rars2      | 1886 | 247    | 876     | 4.680878 | 15.51498 | 1.72881  | Up | 0        | 0        |
| Sowahc     | 4467 | 546.5  | 1936    | 4.367445 | 14.47409 | 1.728612 | Up | 1.34E-13 | 5.05E-13 |
| Cwc22      | 3099 | 1039   | 3684    | 11.97167 | 39.66806 | 1.728353 | Up | 1.33E-13 | 5.03E-13 |
| Npff       | 452  | 6.5    | 23      | 0.513948 | 1.702869 | 1.728274 | Up | 0.001447 | 0.00243  |
| Gas8       | 1602 | 122.5  | 434     | 2.736055 | 9.048799 | 1.725629 | Up | 4.93E-14 | 1.96E-13 |
| Haus8      | 1464 | 517    | 1833    | 12.64479 | 41.78779 | 1.724538 | Up | 5.77E-14 | 2.28E-13 |
| Ppp2r2a    | 2374 | 4278   | 15136.5 | 64.42106 | 212.8557 | 1.724271 | Up | 1.17E-11 | 3.06E-11 |



|              |      |       |         |          |          |          |    |          |          |
|--------------|------|-------|---------|----------|----------|----------|----|----------|----------|
| Klhl20       | 3134 | 964   | 3403.5  | 10.98219 | 36.25596 | 1.723052 | Up | 0        | 0        |
| RGD1561408   | 9686 | 13    | 45.5    | 0.047849 | 0.157903 | 1.722491 | Up | 1.94E-05 | 3.83E-05 |
| Cdk17        | 3670 | 828.5 | 2925    | 8.0539   | 26.57382 | 1.722246 | Up | 0        | 0        |
| Cflar        | 1799 | 1653  | 5834.5  | 32.84063 | 108.2996 | 1.721474 | Up | 6.24E-12 | 1.68E-11 |
| RGD1562259   | 360  | 13    | 46      | 1.282615 | 4.226091 | 1.720236 | Up | 1.24E-05 | 2.48E-05 |
| Cdyl         | 2208 | 273   | 960.5   | 4.416235 | 14.53151 | 1.718296 | Up | 2.09E-13 | 7.60E-13 |
| LOC100910795 | 1937 | 422   | 1487    | 7.781621 | 25.59607 | 1.71778  | Up | 4.13E-13 | 1.41E-12 |
| Spta1        | 7957 | 9     | 32      | 0.040546 | 0.133364 | 1.717747 | Up | 0.000274 | 0.000493 |
| RGD1564719   | 1821 | 183.5 | 644.5   | 3.589931 | 11.80634 | 1.717534 | Up | 3.15E-13 | 1.11E-12 |
| Zfp566       | 1719 | 80    | 282.5   | 1.665972 | 5.478141 | 1.717322 | Up | 0        | 0        |
| Dnaaf2       | 3409 | 799.5 | 2810.5  | 8.379408 | 27.52962 | 1.716065 | Up | 0        | 0        |
| Lamc2        | 5157 | 319.5 | 1127    | 2.219439 | 7.289652 | 1.715655 | Up | 0        | 0        |
| Grhl2        | 4871 | 17    | 60      | 0.124885 | 0.409959 | 1.714878 | Up | 5.88E-07 | 1.26E-06 |
| Zbtb5        | 4348 | 364   | 1277.5  | 2.990377 | 9.813524 | 1.714444 | Up | 1.34E-13 | 5.03E-13 |
| Thoc1        | 1500 | 628.5 | 2204.5  | 14.94826 | 49.04978 | 1.71427  | Up | 5.00E-13 | 1.68E-12 |
| Spa17        | 447  | 133   | 467.5   | 10.64435 | 34.92502 | 1.714174 | Up | 1.20E-13 | 4.54E-13 |
| Pparg        | 1830 | 141.5 | 496.5   | 2.761049 | 9.057487 | 1.713895 | Up | 0        | 0        |
| LOC100361891 | 2121 | 1654  | 5799.5  | 27.82584 | 91.21629 | 1.712867 | Up | 4.25E-12 | 1.19E-11 |
| Ccdc42b      | 948  | 8     | 28.5    | 0.305598 | 1.001344 | 1.712233 | Up | 0.000758 | 0.001302 |
| Dhx15        | 3007 | 5906  | 20675.5 | 70.07913 | 229.5231 | 1.711583 | Up | 2.83E-11 | 7.18E-11 |
| Tada1        | 1455 | 318   | 1115    | 7.802536 | 25.5523  | 1.711438 | Up | 1.88E-13 | 6.86E-13 |
| LOC688298    | 3056 | 316.5 | 1108.5  | 3.703795 | 12.12877 | 1.711357 | Up | 3.85E-13 | 1.32E-12 |
| Zfyve1       | 3821 | 433   | 1515.5  | 4.050044 | 13.25437 | 1.710459 | Up | 1.10E-12 | 3.42E-12 |
| Agtrap       | 2179 | 944   | 3312.5  | 15.49697 | 50.69388 | 1.709825 | Up | 0        | 0        |
| Kcnmb4       | 1028 | 12.5  | 44      | 0.435386 | 1.423754 | 1.709332 | Up | 1.36E-05 | 2.71E-05 |

|              |      |        |        |          |          |          |    |          |          |
|--------------|------|--------|--------|----------|----------|----------|----|----------|----------|
| Susd1        | 2711 | 72.5   | 255    | 0.957265 | 3.130113 | 1.709225 | Up | 0        | 0        |
| Eif2ak2      | 3808 | 1154.5 | 4025.5 | 10.81517 | 35.35154 | 1.708717 | Up | 6.86E-12 | 1.83E-11 |
| Slc28a3      | 2118 | 10     | 35     | 0.168948 | 0.552143 | 1.70846  | Up | 0.000158 | 0.000288 |
| Fbxo6        | 876  | 395    | 1383.5 | 16.14888 | 52.7717  | 1.70833  | Up | 5.15E-14 | 2.05E-13 |
| Syf2         | 1292 | 994    | 3470.5 | 27.47878 | 89.77135 | 1.707937 | Up | 6.24E-13 | 2.04E-12 |
| LOC100909777 | 771  | 9.5    | 33     | 0.437562 | 1.429008 | 1.707454 | Up | 0.000173 | 0.000315 |
| Poli         | 2360 | 162.5  | 569    | 2.463037 | 8.04199  | 1.707114 | Up | 0        | 0        |
| LOC288330    | 825  | 14     | 49     | 0.60445  | 1.973156 | 1.706809 | Up | 7.21E-06 | 1.46E-05 |
| LOC100910276 | 2383 | 181    | 634    | 2.721995 | 8.88109  | 1.706073 | Up | 1.41E-13 | 5.30E-13 |
| Rims2        | 5639 | 97.5   | 339    | 0.615398 | 2.007755 | 1.705992 | Up | 5.35E-14 | 2.12E-13 |
| Disp2        | 6549 | 51     | 178    | 0.277872 | 0.906345 | 1.705639 | Up | 8.44E-15 | 3.52E-14 |
| Wdr70        | 2111 | 554    | 1933.5 | 9.379631 | 30.58956 | 1.705436 | Up | 0        | 0        |
| RGD1310324   | 718  | 80     | 278.5  | 3.970218 | 12.94704 | 1.705333 | Up | 0        | 0        |
| LOC100912221 | 677  | 25     | 87     | 1.310378 | 4.273194 | 1.705331 | Up | 2.19E-09 | 5.21E-09 |
| Cdkl3        | 1731 | 125    | 437.5  | 2.587313 | 8.435459 | 1.705012 | Up | 3.11E-15 | 1.31E-14 |
| Cabp1        | 945  | 8      | 28     | 0.302927 | 0.987334 | 1.704569 | Up | 0.000758 | 0.001302 |
| Bambi        | 842  | 243.5  | 851.5  | 10.35403 | 33.7138  | 1.703147 | Up | 0        | 0        |
| Adm2         | 1042 | 14.5   | 50.5   | 0.497668 | 1.620234 | 1.702947 | Up | 4.62E-06 | 9.46E-06 |
| LOC680761    | 767  | 9.5    | 33     | 0.442087 | 1.438807 | 1.702471 | Up | 0.000173 | 0.000315 |
| 7-Mar        | 2421 | 2815   | 9813   | 41.59295 | 135.2734 | 1.701467 | Up | 0        | 0        |
| Rybp         | 4166 | 2838   | 9876.5 | 24.32578 | 79.10509 | 1.701284 | Up | 0        | 0        |
| LOC100909604 | 1707 | 43     | 149    | 0.899714 | 2.925328 | 1.70106  | Up | 1.22E-13 | 4.63E-13 |
| Vsig1        | 1562 | 5.5    | 19.5   | 0.126548 | 0.411327 | 1.700601 | Up | 0.004105 | 0.006629 |
| RGD1564941   | 1792 | 10.5   | 36.5   | 0.209507 | 0.680284 | 1.699136 | Up | 0.0001   | 0.000187 |
| Rmi1         | 2417 | 869.5  | 3012.5 | 12.81146 | 41.59868 | 1.699103 | Up | 1.49E-13 | 5.54E-13 |

|              |      |        |        |          |          |          |    |          |          |
|--------------|------|--------|--------|----------|----------|----------|----|----------|----------|
| Crem         | 4015 | 380    | 1321   | 3.379566 | 10.9718  | 1.69889  | Up | 0        | 0        |
| Cdc14b       | 3141 | 610.5  | 2119   | 6.930083 | 22.48664 | 1.698124 | Up | 7.45E-13 | 2.40E-12 |
| Mttr7        | 2669 | 27     | 94     | 0.361774 | 1.173833 | 1.698068 | Up | 4.93E-10 | 1.19E-09 |
| LOC100359523 | 1467 | 12     | 41.5   | 0.291142 | 0.944174 | 1.69733  | Up | 5.26E-05 | 0.0001   |
| Pim2         | 2026 | 181.5  | 632.5  | 3.210042 | 10.40686 | 1.696871 | Up | 1.41E-13 | 5.30E-13 |
| LOC100360801 | 5723 | 11     | 38.5   | 0.068778 | 0.22295  | 1.696703 | Up | 9.11E-05 | 0.00017  |
| LOC100910827 | 901  | 358    | 1235.5 | 14.11933 | 45.76033 | 1.696426 | Up | 5.04E-13 | 1.69E-12 |
| LOC100911700 | 621  | 200.5  | 695.5  | 11.53981 | 37.38708 | 1.69592  | Up | 0        | 0        |
| Slc22a14     | 2077 | 6.5    | 23     | 0.112674 | 0.364948 | 1.695531 | Up | 0.001447 | 0.00243  |
| Pard6b       | 3294 | 176    | 612    | 1.914004 | 6.195364 | 1.694595 | Up | 0        | 0        |
| RGD1565983   | 1878 | 283.5  | 980    | 5.389416 | 17.43811 | 1.694043 | Up | 0        | 0        |
| Zfp295       | 3405 | 651.5  | 2259.5 | 6.844525 | 22.1458  | 1.694011 | Up | 2.50E-13 | 8.95E-13 |
| LOC100910945 | 673  | 14     | 48.5   | 0.744376 | 2.408039 | 1.693755 | Up | 1.13E-05 | 2.25E-05 |
| Erbp4        | 4060 | 35     | 121.5  | 0.309182 | 1.000135 | 1.693665 | Up | 2.13E-12 | 6.33E-12 |
| Slc34a1      | 2440 | 5.5    | 19     | 0.081011 | 0.261824 | 1.692397 | Up | 0.004105 | 0.006628 |
| Cdh10        | 3169 | 17     | 59     | 0.192863 | 0.623011 | 1.691683 | Up | 9.12E-07 | 1.94E-06 |
| Fa2h         | 2506 | 9      | 31.5   | 0.130113 | 0.420205 | 1.69133  | Up | 0.000434 | 0.000771 |
| Cradd        | 793  | 29.5   | 101.5  | 1.331516 | 4.300015 | 1.691272 | Up | 1.12E-10 | 2.77E-10 |
| Fam204a      | 2115 | 365    | 1257   | 6.139297 | 19.82351 | 1.691067 | Up | 6.76E-13 | 2.20E-12 |
| RGD1308049   | 1538 | 328.5  | 1144.5 | 7.669939 | 24.76427 | 1.690973 | Up | 2.05E-13 | 7.46E-13 |
| Etaa1        | 2507 | 502    | 1724.5 | 7.12564  | 22.96969 | 1.68864  | Up | 8.49E-13 | 2.71E-12 |
| Mastl        | 2989 | 1855.5 | 6391   | 22.16187 | 71.43196 | 1.68849  | Up | 3.27E-12 | 9.40E-12 |
| LOC100912084 | 785  | 18     | 61.5   | 0.813202 | 2.620814 | 1.688329 | Up | 8.26E-07 | 1.76E-06 |
| Sirt1        | 3787 | 1004   | 3456   | 9.446786 | 30.43848 | 1.688001 | Up | 0        | 0        |
| Thyn1        | 1049 | 687    | 2370   | 23.40198 | 75.37144 | 1.687387 | Up | 0        | 0        |

|              |      |        |        |          |          |          |    |          |          |
|--------------|------|--------|--------|----------|----------|----------|----|----------|----------|
| Rnf19a       | 4187 | 1335.5 | 4600.5 | 11.38773 | 36.6764  | 1.687372 | Up | 6.45E-12 | 1.73E-11 |
| Capn8        | 2411 | 13     | 45     | 0.194131 | 0.625013 | 1.686858 | Up | 1.94E-05 | 3.83E-05 |
| Cd207        | 999  | 21     | 72     | 0.748182 | 2.406257 | 1.685329 | Up | 6.82E-08 | 1.53E-07 |
| Map2k1ip1    | 1240 | 799.5  | 2749   | 23.0195  | 74.00334 | 1.684734 | Up | 0        | 0        |
| Rragd        | 1473 | 81.5   | 280    | 1.978887 | 6.361105 | 1.684589 | Up | 5.82E-14 | 2.30E-13 |
| Mynn         | 2350 | 349    | 1199.5 | 5.294426 | 17.0141  | 1.684185 | Up | 2.05E-13 | 7.47E-13 |
| RGD1562153   | 438  | 6.5    | 22     | 0.52252  | 1.679018 | 1.68406  | Up | 0.002332 | 0.003849 |
| Slc25a36     | 4484 | 1802   | 6183.5 | 14.32214 | 46.00787 | 1.683634 | Up | 5.19E-12 | 1.42E-11 |
| Pnlsr        | 4112 | 1857   | 6381   | 16.13548 | 51.80242 | 1.682783 | Up | 6.78E-12 | 1.81E-11 |
| RGD1561270   | 2753 | 215    | 737.5  | 2.784343 | 8.93695  | 1.682445 | Up | 0        | 0        |
| LOC100912787 | 1674 | 17.5   | 60     | 0.372879 | 1.19666  | 1.682234 | Up | 5.88E-07 | 1.26E-06 |
| Plekhh1      | 6378 | 32     | 109.5  | 0.178814 | 0.573833 | 1.682171 | Up | 3.40E-11 | 8.60E-11 |
| LOC100363314 | 1288 | 18     | 62.5   | 0.498295 | 1.598777 | 1.681896 | Up | 5.32E-07 | 1.15E-06 |
| Smyd4        | 3249 | 137    | 470.5  | 1.51116  | 4.842766 | 1.680175 | Up | 2.87E-13 | 1.01E-12 |
| LOC100911374 | 1087 | 603.5  | 2065.5 | 19.81375 | 63.48207 | 1.679847 | Up | 7.03E-13 | 2.28E-12 |
| Slc6a14      | 2138 | 38     | 131.5  | 0.639484 | 2.04823  | 1.679397 | Up | 3.76E-13 | 1.30E-12 |
| Gcat         | 1555 | 770.5  | 2648.5 | 17.73699 | 56.79808 | 1.679081 | Up | 0        | 0        |
| Gtse1        | 2645 | 3547.5 | 12202  | 48.0712  | 153.9024 | 1.678771 | Up | 0        | 0        |
| Slc7a9       | 1746 | 18     | 62     | 0.368899 | 1.180402 | 1.677979 | Up | 5.32E-07 | 1.15E-06 |
| Casp3        | 2484 | 1772   | 6060   | 25.46235 | 81.44403 | 1.677444 | Up | 7.60E-13 | 2.44E-12 |
| LOC100912222 | 4094 | 7      | 24     | 0.061603 | 0.19704  | 1.677418 | Up | 0.002112 | 0.003492 |
| Ctxn3        | 1502 | 95     | 324    | 2.251419 | 7.198353 | 1.676833 | Up | 0        | 0        |
| Thrb         | 6243 | 42     | 144    | 0.240549 | 0.768941 | 1.676541 | Up | 1.28E-13 | 4.85E-13 |
| Mbd4         | 1892 | 73.5   | 251.5  | 1.389948 | 4.442565 | 1.676362 | Up | 0        | 0        |
| Tnfrsf9      | 1410 | 103.5  | 356.5  | 2.637419 | 8.429608 | 1.676339 | Up | 0        | 0        |

|           |      |        |        |          |          |          |    |          |          |
|-----------|------|--------|--------|----------|----------|----------|----|----------|----------|
| LOC301861 | 1173 | 7.5    | 26     | 0.226593 | 0.723151 | 1.674193 | Up | 0.000831 | 0.001423 |
| Abhd13    | 5283 | 804.5  | 2748.5 | 5.436783 | 17.35079 | 1.674176 | Up | 1.07E-13 | 4.12E-13 |
| Paip2     | 1681 | 1505.5 | 5131.5 | 31.94147 | 101.9115 | 1.673814 | Up | 3.96E-12 | 1.11E-11 |
| Mmp2      | 3053 | 67.5   | 232.5  | 0.791428 | 2.524724 | 1.673596 | Up | 0        | 0        |
| Abcc3     | 5174 | 17     | 58     | 0.117904 | 0.376002 | 1.673129 | Up | 1.42E-06 | 2.99E-06 |
| Fam76b    | 3729 | 844    | 2874   | 8.068212 | 25.7221  | 1.672687 | Up | 8.56E-13 | 2.73E-12 |
| Ccdc19    | 1836 | 36     | 122    | 0.696635 | 2.219494 | 1.671756 | Up | 2.76E-12 | 8.04E-12 |
| Slc25a44  | 3678 | 493    | 1686   | 4.796705 | 15.28131 | 1.671653 | Up | 4.28E-13 | 1.46E-12 |
| Nup37     | 1369 | 447    | 1520   | 11.64651 | 37.08843 | 1.671072 | Up | 8.15E-13 | 2.61E-12 |
| Henmt1    | 1693 | 22     | 75     | 0.463637 | 1.47638  | 1.670996 | Up | 3.99E-08 | 9.04E-08 |
| Spata5    | 3084 | 396    | 1346.5 | 4.578743 | 14.57973 | 1.670941 | Up | 0        | 0        |
| Pip5k1a   | 3518 | 2213.5 | 7552.5 | 22.5161  | 71.68162 | 1.670646 | Up | 0        | 0        |
| LOC679765 | 898  | 7.5    | 25.5   | 0.299177 | 0.951574 | 1.669317 | Up | 0.001328 | 0.002237 |
| Myh7b     | 6097 | 55.5   | 189    | 0.325682 | 1.035839 | 1.669264 | Up | 0        | 0        |
| Zfp830    | 1490 | 342    | 1163.5 | 8.197554 | 26.06692 | 1.668955 | Up | 2.29E-13 | 8.24E-13 |
| Zfp509    | 2685 | 85.5   | 291.5  | 1.14     | 3.622162 | 1.667817 | Up | 0        | 0        |
| Zfand5    | 2755 | 2496.5 | 8440.5 | 32.19415 | 102.2534 | 1.667279 | Up | 0        | 0        |
| LOC681647 | 1998 | 131    | 445    | 2.340121 | 7.427893 | 1.66637  | Up | 8.62E-14 | 3.36E-13 |
| Rec8      | 2049 | 7.5    | 25.5   | 0.130838 | 0.415282 | 1.666309 | Up | 0.001328 | 0.002237 |
| LOC690217 | 981  | 502.5  | 1705   | 18.29046 | 58.00317 | 1.66504  | Up | 8.49E-13 | 2.71E-12 |
| Gpr63     | 2421 | 19     | 65     | 0.281064 | 0.890435 | 1.663613 | Up | 3.10E-07 | 6.76E-07 |
| Tpd52     | 924  | 669    | 2267   | 25.9024  | 82.02533 | 1.662983 | Up | 1.58E-12 | 4.81E-12 |
| Myom2     | 4513 | 8      | 27     | 0.063177 | 0.199943 | 1.662113 | Up | 0.001198 | 0.002022 |
| Rel2      | 1764 | 76.5   | 261    | 1.556538 | 4.926109 | 1.662108 | Up | 0        | 0        |
| Zfp951    | 1942 | 53     | 180    | 0.975691 | 3.082505 | 1.659608 | Up | 4.04E-14 | 1.62E-13 |

|              |      |        |        |          |          |          |    |          |          |
|--------------|------|--------|--------|----------|----------|----------|----|----------|----------|
| Fbxo8        | 1646 | 439.5  | 1485.5 | 9.543889 | 30.13758 | 1.658914 | Up | 0        | 0        |
| Vsig10l      | 2764 | 56     | 189.5  | 0.724571 | 2.287862 | 1.658801 | Up | 1.58E-14 | 6.48E-14 |
| MGC94335     | 1417 | 549.5  | 1854   | 13.83777 | 43.67879 | 1.658321 | Up | 4.66E-14 | 1.86E-13 |
| Pinx1        | 996  | 393    | 1330   | 14.13541 | 44.61442 | 1.658196 | Up | 0        | 0        |
| LOC680767    | 339  | 9.5    | 32     | 1.000238 | 3.156867 | 1.658151 | Up | 0.000274 | 0.000493 |
| LOC100911887 | 3305 | 114.5  | 386.5  | 1.238564 | 3.906975 | 1.657384 | Up | 7.79E-14 | 3.06E-13 |
| RGD1560978   | 1669 | 36     | 121.5  | 0.770463 | 2.430226 | 1.657293 | Up | 4.14E-12 | 1.16E-11 |
| Trpt1        | 2882 | 71.5   | 242    | 0.887851 | 2.80035  | 1.657217 | Up | 0        | 0        |
| Fam162a      | 537  | 2487.5 | 8432   | 166.1801 | 524.0687 | 1.657008 | Up | 0        | 0        |
| Slc20a2      | 3655 | 1733.5 | 5863.5 | 16.97644 | 53.52392 | 1.65665  | Up | 2.65E-12 | 7.76E-12 |
| Slc22a13     | 2029 | 6      | 20.5   | 0.106381 | 0.335327 | 1.656335 | Up | 0.005941 | 0.009493 |
| Lsm1         | 1216 | 495    | 1667   | 14.52628 | 45.77847 | 1.656004 | Up | 4.63E-13 | 1.56E-12 |
| Tuft1        | 2388 | 738    | 2488   | 11.03751 | 34.78002 | 1.655845 | Up | 1.08E-12 | 3.38E-12 |
| Clec2d       | 702  | 133.5  | 450.5  | 6.791453 | 21.39545 | 1.655512 | Up | 1.20E-13 | 4.54E-13 |
| Tmod4        | 1375 | 9      | 30.5   | 0.235469 | 0.741562 | 1.655032 | Up | 0.000682 | 0.001176 |
| RGD1309077   | 1472 | 190.5  | 638.5  | 4.602671 | 14.49085 | 1.654599 | Up | 2.69E-13 | 9.58E-13 |
| Sptbn2       | 8178 | 25     | 85     | 0.10988  | 0.345803 | 1.654028 | Up | 5.16E-09 | 1.21E-08 |
| Zfp667       | 3396 | 45     | 152    | 0.475848 | 1.49567  | 1.652219 | Up | 3.04E-14 | 1.24E-13 |
| Tp53rk       | 2312 | 111.5  | 375    | 1.720869 | 5.402013 | 1.65036  | Up | 0        | 0        |
| Rap1gap2     | 3803 | 1263.5 | 4249.5 | 11.88334 | 37.29448 | 1.650022 | Up | 4.51E-12 | 1.25E-11 |
| Fam122a      | 1331 | 376    | 1271   | 10.13743 | 31.8128  | 1.649916 | Up | 4.39E-13 | 1.49E-12 |
| Arhgef9      | 3787 | 177.5  | 597.5  | 1.67651  | 5.260884 | 1.649844 | Up | 0        | 0        |
| Bin2a        | 2607 | 16     | 54     | 0.221373 | 0.694664 | 1.649836 | Up | 3.79E-06 | 7.82E-06 |
| Fam103a1     | 812  | 401.5  | 1346   | 17.67601 | 55.4662  | 1.649816 | Up | 0        | 0        |
| LOC690073    | 7481 | 937    | 3148.5 | 4.478423 | 14.04302 | 1.64879  | Up | 0        | 0        |

|              |      |        |         |          |          |          |    |          |          |
|--------------|------|--------|---------|----------|----------|----------|----|----------|----------|
| Fam178b      | 1721 | 231.5  | 778.5   | 4.820872 | 15.09923 | 1.647109 | Up | 0        | 0        |
| Catsper2     | 2234 | 59     | 198.5   | 0.948886 | 2.970382 | 1.646341 | Up | 2.53E-14 | 1.03E-13 |
| Zwint        | 1810 | 2110   | 7068.5  | 41.66125 | 130.3458 | 1.645566 | Up | 1.05E-12 | 3.29E-12 |
| Cwf19l1      | 2310 | 993    | 3321    | 15.34913 | 47.97753 | 1.644202 | Up | 1.91E-12 | 5.73E-12 |
| Preli2       | 842  | 29     | 97.5    | 1.237206 | 3.866585 | 1.643974 | Up | 6.07E-10 | 1.47E-09 |
| Rapgef2      | 6311 | 3661.5 | 12249.5 | 20.73478 | 64.79052 | 1.64373  | Up | 0        | 0        |
| LOC691020    | 783  | 7.5    | 25.5    | 0.343117 | 1.071792 | 1.643251 | Up | 0.001328 | 0.002237 |
| LOC100911550 | 2346 | 1426   | 4776    | 21.7633  | 67.92532 | 1.642052 | Up | 1.67E-12 | 5.06E-12 |
| Tmc7         | 2181 | 93     | 310.5   | 1.525307 | 4.757889 | 1.641222 | Up | 3.69E-14 | 1.49E-13 |
| Apoo         | 906  | 268    | 891     | 10.5102  | 32.7814  | 1.641087 | Up | 1.39E-13 | 5.23E-13 |
| LOC100366035 | 976  | 27.5   | 92.5    | 1.011468 | 3.153616 | 1.640556 | Up | 1.15E-09 | 2.75E-09 |
| Defb29       | 816  | 96     | 322     | 4.211198 | 13.12617 | 1.640143 | Up | 0        | 0        |
| RGD1308297   | 4713 | 2110.5 | 7035    | 15.98342 | 49.81959 | 1.640137 | Up | 1.05E-12 | 3.29E-12 |
| Fam82a1      | 2012 | 123    | 408.5   | 2.179563 | 6.786413 | 1.63861  | Up | 0        | 0        |
| LOC310177    | 675  | 45     | 149     | 2.371956 | 7.384497 | 1.638422 | Up | 4.60E-14 | 1.84E-13 |
| LOC100151767 | 2330 | 1142   | 3798.5  | 17.50049 | 54.4262  | 1.636906 | Up | 2.46E-12 | 7.25E-12 |
| Pde4d        | 2470 | 123    | 408.5   | 1.779132 | 5.529135 | 1.63588  | Up | 0        | 0        |
| Med26        | 3617 | 383    | 1277    | 3.794912 | 11.79012 | 1.63544  | Up | 1.49E-13 | 5.54E-13 |
| Tsnaxip1     | 2590 | 29.5   | 98.5    | 0.40923  | 1.270946 | 1.634919 | Up | 3.95E-10 | 9.60E-10 |
| Lag3         | 1817 | 9      | 30      | 0.176927 | 0.549259 | 1.634336 | Up | 0.000682 | 0.001176 |
| LOC100911616 | 744  | 10     | 33      | 0.477104 | 1.479657 | 1.632888 | Up | 0.00039  | 0.000694 |
| LOC679894    | 4945 | 241    | 796     | 1.735702 | 5.380122 | 1.63212  | Up | 2.12E-13 | 7.71E-13 |
| LOC363391    | 1046 | 27     | 89.5    | 0.925304 | 2.867467 | 1.631778 | Up | 4.20E-09 | 9.88E-09 |
| Golga7b      | 2849 | 7      | 23.5    | 0.088926 | 0.275549 | 1.631636 | Up | 0.003336 | 0.00544  |
| Nfatc2       | 3701 | 168.5  | 560     | 1.631549 | 5.054692 | 1.631381 | Up | 1.69E-13 | 6.23E-13 |

|            |      |        |         |          |          |          |    |          |          |
|------------|------|--------|---------|----------|----------|----------|----|----------|----------|
| Cxcl12     | 1880 | 790    | 2616    | 15.00454 | 46.43872 | 1.629929 | Up | 8.43E-13 | 2.70E-12 |
| Ptpn2      | 1494 | 994.5  | 3292.5  | 23.79481 | 73.57084 | 1.628487 | Up | 6.24E-13 | 2.04E-12 |
| RGD1565647 | 4141 | 607    | 2000    | 5.215162 | 16.11283 | 1.627426 | Up | 0        | 0        |
| RGD1311429 | 4858 | 1602   | 5304.5  | 11.79417 | 36.42789 | 1.62697  | Up | 3.38E-12 | 9.68E-12 |
| Prpf3      | 2331 | 1384.5 | 4590.5  | 21.27575 | 65.7115  | 1.626936 | Up | 3.21E-12 | 9.24E-12 |
| Snip1      | 2338 | 343.5  | 1133    | 5.243431 | 16.19203 | 1.626701 | Up | 0        | 0        |
| Usp1       | 3115 | 700.5  | 2309.5  | 8.016637 | 24.74834 | 1.626263 | Up | 0        | 0        |
| Dot1l      | 6015 | 1758.5 | 5834.5  | 10.48701 | 32.37408 | 1.626236 | Up | 4.98E-12 | 1.37E-11 |
| Abl2       | 3764 | 1761   | 5829.5  | 16.74176 | 51.65108 | 1.625347 | Up | 3.10E-12 | 8.96E-12 |
| LOC689756  | 762  | 759.5  | 2513    | 35.71061 | 110.117  | 1.624613 | Up | 1.87E-12 | 5.61E-12 |
| Gpt        | 1744 | 66     | 219.5   | 1.356812 | 4.18323  | 1.624396 | Up | 0        | 0        |
| Irs2       | 6301 | 2498.5 | 8271.5  | 14.20826 | 43.79474 | 1.624027 | Up | 0        | 0        |
| RGD1306746 | 2521 | 206    | 677.5   | 2.913969 | 8.976563 | 1.623178 | Up | 2.46E-13 | 8.84E-13 |
| Slc30a6    | 2023 | 371.5  | 1224    | 6.557703 | 20.19464 | 1.62271  | Up | 5.35E-13 | 1.78E-12 |
| Fosl2      | 984  | 899    | 2974    | 32.7668  | 100.8246 | 1.621541 | Up | 0        | 0        |
| Col7a1     | 9170 | 206.5  | 680     | 0.805086 | 2.476677 | 1.62119  | Up | 2.46E-13 | 8.84E-13 |
| Mterfd1    | 1450 | 742    | 2450.5  | 18.3412  | 56.4054  | 1.620745 | Up | 4.00E-13 | 1.37E-12 |
| Taf1a      | 1534 | 173.5  | 572.5   | 4.041023 | 12.42001 | 1.619874 | Up | 3.79E-13 | 1.30E-12 |
| MGC125002  | 1556 | 382    | 1252.5  | 8.741711 | 26.83562 | 1.618162 | Up | 5.33E-13 | 1.78E-12 |
| Lct        | 6117 | 8      | 26      | 0.046611 | 0.143086 | 1.618143 | Up | 0.001883 | 0.003135 |
| Basp1      | 1024 | 2220   | 7340.5  | 77.82893 | 238.8586 | 1.617779 | Up | 0        | 0        |
| Ptprn2     | 5136 | 94.5   | 310     | 0.657446 | 2.017623 | 1.617713 | Up | 0        | 0        |
| RGD1309906 | 1289 | 303.5  | 996     | 8.408617 | 25.80471 | 1.617694 | Up | 2.56E-13 | 9.16E-13 |
| RGD1311783 | 2144 | 1290.5 | 4240.5  | 21.48822 | 65.93466 | 1.617491 | Up | 7.67E-12 | 2.04E-11 |
| Ccng1      | 3198 | 13360  | 43784.5 | 148.9379 | 456.8522 | 1.617016 | Up | 0        | 0        |



|              |      |        |        |          |          |          |    |          |          |
|--------------|------|--------|--------|----------|----------|----------|----|----------|----------|
| Sync         | 2156 | 82.5   | 272    | 1.369921 | 4.201211 | 1.616712 | Up | 0        | 0        |
| Sub1         | 782  | 2290   | 7482.5 | 104.301  | 319.5009 | 1.615066 | Up | 0        | 0        |
| Sclt1        | 2319 | 446.5  | 1461.5 | 6.874245 | 21.04773 | 1.614391 | Up | 0        | 0        |
| LOC100909737 | 795  | 95.5   | 315    | 4.30462  | 13.17666 | 1.614027 | Up | 0        | 0        |
| Pde4b        | 3133 | 1222.5 | 4018.5 | 13.98672 | 42.79111 | 1.613253 | Up | 5.44E-12 | 1.48E-11 |
| LOC498592    | 759  | 190.5  | 623    | 8.969457 | 27.43173 | 1.612753 | Up | 2.69E-13 | 9.58E-13 |
| Mrpl47       | 1960 | 388.5  | 1265   | 7.044035 | 21.53389 | 1.612135 | Up | 6.64E-13 | 2.16E-12 |
| LOC100361068 | 969  | 10     | 32.5   | 0.370464 | 1.132324 | 1.611883 | Up | 0.000608 | 0.001051 |
| LOC100364435 | 210  | 94.5   | 313    | 16.00279 | 48.90507 | 1.611661 | Up | 0        | 0        |
| Sarnp        | 1244 | 1960   | 6401.5 | 56.21555 | 171.747  | 1.611244 | Up | 0        | 0        |
| Slc15a4      | 2730 | 590    | 1932   | 7.730852 | 23.61209 | 1.610827 | Up | 0        | 0        |
| Slco2a1      | 3392 | 365.5  | 1198.5 | 3.859067 | 11.7856  | 1.610701 | Up | 6.76E-13 | 2.20E-12 |
| RGD1562794   | 2514 | 16     | 52     | 0.226369 | 0.691294 | 1.610625 | Up | 9.14E-06 | 1.84E-05 |
| Rnf25        | 1466 | 932    | 3056   | 22.76578 | 69.50982 | 1.61035  | Up | 1.55E-12 | 4.72E-12 |
| RGD1565082   | 3746 | 339.5  | 1110   | 3.239743 | 9.890166 | 1.610115 | Up | 2.04E-13 | 7.42E-13 |
| Hccs         | 2398 | 709    | 2313.5 | 10.53889 | 32.16961 | 1.609976 | Up | 1.51E-12 | 4.61E-12 |
| Slc25a33     | 1416 | 238    | 777    | 6.003884 | 18.30314 | 1.608123 | Up | 6.71E-13 | 2.19E-12 |
| Zfp330       | 1920 | 1041   | 3399   | 19.3836  | 59.07696 | 1.607759 | Up | 2.83E-12 | 8.24E-12 |
| Cbx5         | 1190 | 1801.5 | 5879   | 54.13366 | 164.9837 | 1.607725 | Up | 2.65E-12 | 7.75E-12 |
| Leng1        | 1846 | 227    | 742.5  | 4.400524 | 13.41011 | 1.607573 | Up | 3.55E-15 | 1.49E-14 |
| Cpne5        | 4308 | 13     | 42.5   | 0.107848 | 0.328642 | 1.607519 | Up | 7.36E-05 | 0.000139 |
| Ncald        | 3270 | 308    | 1004.5 | 3.367778 | 10.26052 | 1.607235 | Up | 0        | 0        |
| Rab9b        | 3846 | 39     | 127.5  | 0.362707 | 1.104594 | 1.606638 | Up | 3.04E-12 | 8.81E-12 |
| Il18rap      | 1884 | 425.5  | 1385   | 8.065941 | 24.56398 | 1.606629 | Up | 1.53E-12 | 4.67E-12 |
| LOC679983    | 471  | 28     | 92     | 2.136981 | 6.502306 | 1.605378 | Up | 2.46E-09 | 5.83E-09 |

|              |       |        |        |          |          |          |    |          |          |
|--------------|-------|--------|--------|----------|----------|----------|----|----------|----------|
| Trmt12       | 1655  | 159.5  | 518.5  | 3.441839 | 10.47209 | 1.605298 | Up | 8.53E-14 | 3.32E-13 |
| Pacrgl       | 1572  | 185.5  | 603    | 4.208833 | 12.79189 | 1.603737 | Up | 0        | 0        |
| Acot2        | 2400  | 271.5  | 886.5  | 4.048337 | 12.30357 | 1.603675 | Up | 8.22E-14 | 3.21E-13 |
| Gtf3c6       | 1553  | 519    | 1686.5 | 11.9437  | 36.29073 | 1.603352 | Up | 0        | 0        |
| Rfx3         | 2441  | 227    | 740    | 3.324126 | 10.0985  | 1.603094 | Up | 3.55E-15 | 1.49E-14 |
| LOC100911166 | 2123  | 58.5   | 189.5  | 0.983994 | 2.987542 | 1.602238 | Up | 1.35E-14 | 5.59E-14 |
| Efha2        | 1865  | 187    | 606.5  | 3.57531  | 10.85139 | 1.60174  | Up | 3.37E-13 | 1.18E-12 |
| Ankra2       | 1658  | 147    | 478.5  | 3.170158 | 9.618901 | 1.601318 | Up | 1.02E-13 | 3.94E-13 |
| Pclo         | 15961 | 52     | 169.5  | 0.116041 | 0.35199  | 1.600903 | Up | 5.20E-14 | 2.06E-13 |
| Ccng2        | 2506  | 869.5  | 2818.5 | 12.38277 | 37.55502 | 1.600671 | Up | 1.49E-13 | 5.54E-13 |
| Vgll4        | 1356  | 781    | 2539.5 | 20.62404 | 62.544   | 1.600544 | Up | 1.94E-13 | 7.09E-13 |
| RGD1311249   | 2329  | 569.5  | 1853   | 8.764565 | 26.55357 | 1.599151 | Up | 0        | 0        |
| Phlda3       | 1511  | 6883   | 22404  | 163.172  | 494.2721 | 1.598912 | Up | 1.97E-11 | 5.07E-11 |
| Arid4b       | 4980  | 388    | 1257.5 | 2.780907 | 8.41939  | 1.59816  | Up | 6.64E-13 | 2.16E-12 |
| Dnali1       | 2250  | 10.5   | 34     | 0.166606 | 0.503712 | 1.596157 | Up | 0.000249 | 0.000448 |
| Tsen15       | 987   | 575.5  | 1862   | 20.85548 | 62.99417 | 1.594791 | Up | 3.54E-13 | 1.23E-12 |
| Bloc1s4      | 1301  | 395    | 1279.5 | 10.87085 | 32.83403 | 1.594727 | Up | 5.15E-14 | 2.05E-13 |
| Rab12        | 1984  | 2129   | 6871.5 | 38.26462 | 115.5524 | 1.594464 | Up | 0        | 0        |
| Cited2       | 1996  | 5295.5 | 17200  | 95.23586 | 287.2276 | 1.592618 | Up | 1.36E-11 | 3.54E-11 |
| Ist1         | 2261  | 2438   | 7869.5 | 38.53173 | 116.2071 | 1.592579 | Up | 0        | 0        |
| LOC690068    | 900   | 221    | 710    | 8.727517 | 26.31148 | 1.59205  | Up | 4.91E-14 | 1.95E-13 |
| RGD1305045   | 914   | 1505.5 | 4839   | 58.62277 | 176.6085 | 1.591022 | Up | 3.96E-12 | 1.12E-11 |
| LOC500974    | 2392  | 345    | 1111   | 5.149296 | 15.51152 | 1.590893 | Up | 9.33E-13 | 2.96E-12 |
| Vcam1        | 3007  | 86     | 276.5  | 1.019584 | 3.069838 | 1.590182 | Up | 0        | 0        |
| Alkbh8       | 2467  | 252.5  | 810    | 3.643972 | 10.97151 | 1.590179 | Up | 1.17E-13 | 4.46E-13 |

|              |      |        |        |          |          |          |    |          |          |
|--------------|------|--------|--------|----------|----------|----------|----|----------|----------|
| RGD1564405   | 2013 | 120.5  | 387    | 2.138456 | 6.434723 | 1.589309 | Up | 0        | 0        |
| Scube2-ps1   | 3543 | 9      | 29     | 0.090088 | 0.27099  | 1.588832 | Up | 0.001068 | 0.001808 |
| Btg4         | 1140 | 16     | 51.5   | 0.502221 | 1.510238 | 1.588382 | Up | 1.41E-05 | 2.81E-05 |
| RGD1563351   | 1005 | 8      | 25.5   | 0.2837   | 0.852949 | 1.588091 | Up | 0.00294  | 0.004808 |
| Lsg1         | 2283 | 1132.5 | 3641   | 17.72029 | 53.25264 | 1.587451 | Up | 4.49E-12 | 1.25E-11 |
| LOC100912596 | 521  | 177    | 574.5  | 12.24584 | 36.77979 | 1.586622 | Up | 0        | 0        |
| lqcb1        | 2844 | 257.5  | 829.5  | 3.237549 | 9.722155 | 1.586374 | Up | 5.38E-13 | 1.79E-12 |
| Krt10        | 1581 | 13     | 42     | 0.29387  | 0.882382 | 1.586225 | Up | 7.36E-05 | 0.000139 |
| LOC100909598 | 483  | 96     | 309.5  | 7.126442 | 21.39662 | 1.586129 | Up | 0        | 0        |
| RGD1562378   | 1075 | 43     | 139.5  | 1.438797 | 4.313683 | 1.584057 | Up | 4.65E-13 | 1.57E-12 |
| Reps2-ps1    | 2027 | 11     | 35     | 0.194469 | 0.582703 | 1.583219 | Up | 0.000347 | 0.00062  |
| LOC100360595 | 395  | 19.5   | 62     | 1.749819 | 5.24274  | 1.583115 | Up | 1.15E-06 | 2.44E-06 |
| Wdr45        | 1478 | 345.5  | 1109.5 | 8.363784 | 25.05448 | 1.582841 | Up | 9.33E-13 | 2.96E-12 |
| LOC100359722 | 1155 | 190    | 609.5  | 5.879469 | 17.61101 | 1.58272  | Up | 2.69E-13 | 9.57E-13 |
| Arhgap12     | 4891 | 814    | 2603   | 5.935874 | 17.77313 | 1.582165 | Up | 0        | 0        |
| Tfam         | 1463 | 1270   | 4063.5 | 30.98194 | 92.74057 | 1.581773 | Up | 5.97E-12 | 1.61E-11 |
| RGD1307461   | 2597 | 23.5   | 75.5   | 0.325013 | 0.972874 | 1.581754 | Up | 8.58E-08 | 1.92E-07 |
| Rtp1         | 825  | 16.5   | 52.5   | 0.711842 | 2.129525 | 1.580903 | Up | 9.14E-06 | 1.84E-05 |
| Gtf2f2       | 1481 | 645.5  | 2062.5 | 15.55697 | 46.52225 | 1.58036  | Up | 5.31E-13 | 1.77E-12 |
| Rsbn1l       | 3392 | 741.5  | 2374   | 7.820363 | 23.36577 | 1.579089 | Up | 0        | 0        |
| RGD1309759   | 1571 | 1481   | 4741   | 33.70516 | 100.7016 | 1.579046 | Up | 5.28E-12 | 1.44E-11 |
| Gpatch3      | 1813 | 66     | 211    | 1.304542 | 3.895542 | 1.578281 | Up | 0        | 0        |
| LOC100363943 | 1939 | 138.5  | 441.5  | 2.546038 | 7.600839 | 1.577905 | Up | 1.83E-13 | 6.72E-13 |
| RGD1564927   | 2908 | 166    | 531.5  | 2.043436 | 6.098913 | 1.577556 | Up | 2.16E-13 | 7.83E-13 |
| Zfp967       | 2975 | 499    | 1591.5 | 5.990203 | 17.86039 | 1.576087 | Up | 0        | 0        |

|              |      |        |        |          |          |          |    |          |          |
|--------------|------|--------|--------|----------|----------|----------|----|----------|----------|
| Atp6v1b1     | 2487 | 99.5   | 316    | 1.422509 | 4.239619 | 1.575496 | Up | 1.62E-14 | 6.66E-14 |
| Gin1         | 1866 | 254    | 809.5  | 4.856679 | 14.46853 | 1.574876 | Up | 3.19E-13 | 1.12E-12 |
| Rchy1        | 1718 | 995.5  | 3164.5 | 20.6404  | 61.44372 | 1.573794 | Up | 0        | 0        |
| Zfp800       | 2402 | 557    | 1772.5 | 8.281066 | 24.6166  | 1.571743 | Up | 5.01E-13 | 1.68E-12 |
| LOC316820    | 2942 | 234.5  | 743.5  | 2.837093 | 8.430606 | 1.571223 | Up | 4.49E-13 | 1.52E-12 |
| Epb4114a     | 2048 | 62     | 197.5  | 1.084401 | 3.222093 | 1.571099 | Up | 0        | 0        |
| Sik1         | 2650 | 364    | 1164.5 | 4.930711 | 14.64939 | 1.570973 | Up | 1.34E-13 | 5.03E-13 |
| Mucdhl       | 2712 | 23     | 73.5   | 0.304529 | 0.904676 | 1.570823 | Up | 2.03E-07 | 4.47E-07 |
| Zkscan1      | 3168 | 495.5  | 1579   | 5.600126 | 16.62992 | 1.57025  | Up | 4.63E-13 | 1.56E-12 |
| Suhw3        | 2214 | 318    | 1011.5 | 5.136489 | 15.24617 | 1.569592 | Up | 1.88E-13 | 6.86E-13 |
| LOC100910349 | 1585 | 65     | 207    | 1.468537 | 4.358593 | 1.569483 | Up | 0        | 0        |
| Utp23        | 992  | 267.5  | 850.5  | 9.626953 | 28.56687 | 1.569192 | Up | 7.08E-13 | 2.29E-12 |
| Bcl10        | 1668 | 1084   | 3444.5 | 23.2139  | 68.88089 | 1.569115 | Up | 3.69E-12 | 1.05E-11 |
| LOC100909970 | 967  | 7      | 22     | 0.257252 | 0.763299 | 1.569068 | Up | 0.005232 | 0.008391 |
| LOC100188936 | 1469 | 409.5  | 1303   | 9.972825 | 29.58401 | 1.568744 | Up | 4.45E-13 | 1.51E-12 |
| Zdbf2        | 7238 | 14     | 44.5   | 0.068896 | 0.204209 | 1.567546 | Up | 6.54E-05 | 0.000124 |
| LOC100909529 | 861  | 306    | 967    | 12.64879 | 37.48983 | 1.5675   | Up | 0        | 0        |
| C1qtnf2      | 1216 | 45     | 143    | 1.324687 | 3.925505 | 1.567227 | Up | 3.06E-13 | 1.08E-12 |
| Zwilch       | 3105 | 2595   | 8209.5 | 29.85611 | 88.3162  | 1.564652 | Up | 0        | 0        |
| Arf2         | 2201 | 1068.5 | 3366.5 | 17.27953 | 51.08685 | 1.563888 | Up | 3.46E-12 | 9.90E-12 |
| Mcm8         | 3226 | 360.5  | 1138.5 | 3.982095 | 11.76969 | 1.563477 | Up | 4.37E-13 | 1.48E-12 |
| Tbxa2r       | 1880 | 52     | 166    | 0.989139 | 2.922132 | 1.562776 | Up | 5.42E-14 | 2.15E-13 |
| Hemk1        | 1553 | 110    | 348    | 2.531965 | 7.474443 | 1.561709 | Up | 0        | 0        |
| Akirin2      | 1482 | 1636   | 5162   | 39.4335  | 116.2196 | 1.55936  | Up | 2.92E-12 | 8.48E-12 |
| Trim7        | 1686 | 94.5   | 299    | 2.007514 | 5.915039 | 1.558977 | Up | 0        | 0        |

|              |       |        |         |          |          |          |    |          |          |
|--------------|-------|--------|---------|----------|----------|----------|----|----------|----------|
| Uchl5        | 1824  | 657    | 2069.5  | 12.8579  | 37.8758  | 1.558621 | Up | 0        | 0        |
| Ccdc59       | 1539  | 421    | 1326.5  | 9.771889 | 28.77307 | 1.55801  | Up | 4.13E-13 | 1.41E-12 |
| Ppp6c        | 1867  | 1318.5 | 4153    | 25.21853 | 74.19701 | 1.556877 | Up | 4.07E-12 | 1.14E-11 |
| Ash1l        | 11394 | 3404.5 | 10710.5 | 10.66127 | 31.36644 | 1.556842 | Up | 0        | 0        |
| Sfrp1        | 3506  | 26     | 82.5    | 0.264709 | 0.778055 | 1.555464 | Up | 4.02E-08 | 9.10E-08 |
| Ythdf3       | 4150  | 3391   | 10662   | 29.15657 | 85.67554 | 1.555062 | Up | 0        | 0        |
| LOC24906     | 1607  | 11     | 35      | 0.245295 | 0.720434 | 1.554349 | Up | 0.000347 | 0.00062  |
| Serp1nb1a    | 1289  | 55.5   | 174     | 1.537369 | 4.51521  | 1.55433  | Up | 0        | 0        |
| Arg2         | 1463  | 18     | 57      | 0.44065  | 1.294018 | 1.554151 | Up | 4.72E-06 | 9.68E-06 |
| Ggct         | 1875  | 368.5  | 1159.5  | 7.039173 | 20.66825 | 1.553938 | Up | 8.46E-14 | 3.30E-13 |
| Eny2         | 2048  | 1110.5 | 3474    | 19.28215 | 56.60776 | 1.553734 | Up | 4.75E-12 | 1.31E-11 |
| Atl2         | 2870  | 1058.5 | 3322    | 13.15015 | 38.60355 | 1.553654 | Up | 1.94E-12 | 5.82E-12 |
| Ociad1       | 1373  | 3724   | 11682   | 96.85805 | 283.8617 | 1.551244 | Up | 4.10E-12 | 1.15E-11 |
| Hspa1b       | 5918  | 532    | 1673    | 3.219552 | 9.433936 | 1.551    | Up | 0        | 0        |
| Il7          | 1128  | 11     | 34.5    | 0.349458 | 1.023932 | 1.550927 | Up | 0.000536 | 0.000945 |
| LOC100363276 | 5414  | 8      | 25      | 0.052451 | 0.15367  | 1.550783 | Up | 0.00294  | 0.004807 |
| LOC100360437 | 1066  | 35     | 109.5   | 1.172182 | 3.434152 | 1.550757 | Up | 3.19E-10 | 7.78E-10 |
| Ppil4        | 3463  | 1189.5 | 3728.5  | 12.27332 | 35.94533 | 1.550279 | Up | 3.07E-12 | 8.87E-12 |
| Ccl28        | 1418  | 11     | 34.5    | 0.277585 | 0.81262  | 1.549651 | Up | 0.000536 | 0.000945 |
| Rsf1         | 4975  | 1085.5 | 3403    | 7.796109 | 22.81247 | 1.548996 | Up | 3.86E-12 | 1.09E-11 |
| LOC100361658 | 3579  | 604.5  | 1893    | 6.036086 | 17.66193 | 1.548957 | Up | 6.80E-13 | 2.21E-12 |
| Cyp21a1      | 1963  | 36     | 112     | 0.651857 | 1.906736 | 1.548478 | Up | 1.87E-10 | 4.60E-10 |
| Nfat5        | 4593  | 4222   | 13208.5 | 32.82542 | 96.00824 | 1.548345 | Up | 1.15E-11 | 3.01E-11 |
| RGD1309374   | 2244  | 238    | 744     | 3.783436 | 11.06381 | 1.548079 | Up | 6.71E-13 | 2.19E-12 |
| Erich1       | 1108  | 274    | 863     | 8.87894  | 25.95967 | 1.547813 | Up | 1.86E-13 | 6.82E-13 |

|              |      |        |         |          |          |          |    |          |          |
|--------------|------|--------|---------|----------|----------|----------|----|----------|----------|
| Mgea5        | 2751 | 2417.5 | 7547.5  | 31.34721 | 91.62792 | 1.54745  | Up | 0        | 0        |
| Cryab        | 706  | 2665.5 | 8349    | 135.0804 | 394.8085 | 1.547335 | Up | 0        | 0        |
| Chmp4c       | 1616 | 22.5   | 70      | 0.493784 | 1.442312 | 1.546432 | Up | 3.49E-07 | 7.60E-07 |
| Bcas2        | 1083 | 1143   | 3568    | 37.62961 | 109.9123 | 1.546413 | Up | 1.73E-12 | 5.22E-12 |
| RGD1565025   | 1107 | 9      | 28      | 0.291957 | 0.85179  | 1.544743 | Up | 0.001661 | 0.002773 |
| Gpr149       | 3845 | 13.5   | 42      | 0.124369 | 0.362821 | 1.544628 | Up | 7.36E-05 | 0.000139 |
| Mbip         | 1590 | 663.5  | 2069.5  | 14.92155 | 43.46526 | 1.542466 | Up | 2.84E-13 | 1.01E-12 |
| Rbm4b        | 1830 | 289    | 902     | 5.641613 | 16.42869 | 1.542038 | Up | 0        | 0        |
| RGD1563917   | 1206 | 8      | 25      | 0.238795 | 0.695083 | 1.541416 | Up | 0.00294  | 0.004806 |
| Trim23       | 3308 | 668.5  | 2079.5  | 7.202596 | 20.96107 | 1.541124 | Up | 4.14E-13 | 1.41E-12 |
| Spata2L      | 3029 | 95     | 296.5   | 1.124748 | 3.271852 | 1.540506 | Up | 0        | 0        |
| Tmem69       | 1968 | 752    | 2340.5  | 13.64996 | 39.68907 | 1.539845 | Up | 2.42E-12 | 7.13E-12 |
| Tbcel        | 1566 | 80     | 248.5   | 1.823613 | 5.302282 | 1.539814 | Up | 0        | 0        |
| LOC100912357 | 787  | 453.5  | 1397.5  | 20.40511 | 59.32658 | 1.539748 | Up | 1.56E-12 | 4.77E-12 |
| Elac1        | 2836 | 107.5  | 334     | 1.353854 | 3.934871 | 1.539244 | Up | 0        | 0        |
| Zcchc3       | 3057 | 348.5  | 1085.5  | 4.079969 | 11.85448 | 1.538802 | Up | 4.24E-14 | 1.70E-13 |
| Zfp799       | 4600 | 157    | 487.5   | 1.218679 | 3.540135 | 1.538486 | Up | 0        | 0        |
| Ahsa2        | 3698 | 1305   | 4066    | 12.61914 | 36.64548 | 1.538021 | Up | 7.23E-12 | 1.93E-11 |
| Chuk         | 3526 | 1658   | 5143    | 16.75139 | 48.64137 | 1.537903 | Up | 7.21E-12 | 1.92E-11 |
| Nfkb2        | 3098 | 1334   | 4154    | 15.41679 | 44.75704 | 1.537612 | Up | 1.66E-12 | 5.04E-12 |
| Mrps18a      | 852  | 850.5  | 2647    | 35.74884 | 103.7222 | 1.536756 | Up | 2.20E-12 | 6.54E-12 |
| Star         | 1154 | 14     | 43      | 0.432124 | 1.252628 | 1.53544  | Up | 0.000101 | 0.000188 |
| P4ha1        | 2145 | 6424   | 19945.5 | 107.1662 | 310.6443 | 1.535414 | Up | 2.55E-11 | 6.52E-11 |
| Anapc13      | 616  | 428    | 1327.5  | 24.85772 | 72.04975 | 1.535299 | Up | 2.52E-13 | 9.04E-13 |
| Afmid        | 2511 | 298.5  | 924     | 4.253002 | 12.31761 | 1.534169 | Up | 5.55E-13 | 1.84E-12 |

|              |       |        |        |          |          |          |    |          |          |
|--------------|-------|--------|--------|----------|----------|----------|----|----------|----------|
| Aasdh        | 3683  | 255    | 789.5  | 2.472076 | 7.158984 | 1.534032 | Up | 0        | 0        |
| Arl6ip6      | 1745  | 1092   | 3379.5 | 22.31976 | 64.62153 | 1.533693 | Up | 3.40E-12 | 9.73E-12 |
| Tlr6         | 2820  | 195    | 602    | 2.461562 | 7.126617 | 1.533644 | Up | 1.92E-13 | 7.02E-13 |
| LOC690581    | 2594  | 400    | 1237   | 5.495077 | 15.9052  | 1.533287 | Up | 0        | 0        |
| Phkg1        | 1388  | 12     | 37     | 0.306886 | 0.888049 | 1.532935 | Up | 0.000306 | 0.000549 |
| Poc5         | 2329  | 429.5  | 1330.5 | 6.587477 | 19.06204 | 1.532905 | Up | 0        | 0        |
| Smc5         | 5932  | 3439.5 | 10634  | 20.68529 | 59.85132 | 1.532778 | Up | 0        | 0        |
| Adora2a      | 2485  | 11     | 34     | 0.158627 | 0.458975 | 1.532773 | Up | 0.000536 | 0.000945 |
| RGD1560314   | 2199  | 48     | 149    | 0.779776 | 2.255268 | 1.532167 | Up | 3.08E-13 | 1.08E-12 |
| Ccdc14       | 2790  | 376.5  | 1169   | 4.832204 | 13.97379 | 1.53197  | Up | 4.39E-13 | 1.49E-12 |
| RGD1561851   | 936   | 39     | 121    | 1.483004 | 4.288144 | 1.531831 | Up | 3.76E-11 | 9.47E-11 |
| LOC686234    | 1727  | 242    | 747.5  | 4.998273 | 14.44904 | 1.531472 | Up | 3.84E-13 | 1.32E-12 |
| Sptbn5       | 10860 | 23.5   | 73     | 0.077352 | 0.223512 | 1.530834 | Up | 2.03E-07 | 4.47E-07 |
| Ptpr         | 3578  | 31     | 96     | 0.310188 | 0.896292 | 1.530825 | Up | 4.16E-09 | 9.78E-09 |
| RGD1309139   | 2401  | 11     | 34     | 0.164416 | 0.475032 | 1.530675 | Up | 0.000536 | 0.000945 |
| Lepr         | 3650  | 29     | 90     | 0.285719 | 0.825209 | 1.530162 | Up | 1.22E-08 | 2.82E-08 |
| Rsph6a       | 2352  | 10.5   | 32.5   | 0.160112 | 0.462297 | 1.529735 | Up | 0.000608 | 0.001051 |
| LOC100911963 | 1158  | 12.5   | 38.5   | 0.387004 | 1.11584  | 1.52771  | Up | 0.000199 | 0.00036  |
| Mterfd2      | 1323  | 369    | 1138.5 | 9.962153 | 28.71552 | 1.527301 | Up | 0        | 0        |
| Fcn1         | 1291  | 6.5    | 20     | 0.179941 | 0.518618 | 1.527146 | Up | 0.005941 | 0.009494 |
| Pold3        | 1743  | 627.5  | 1936.5 | 12.87695 | 37.09301 | 1.526357 | Up | 6.79E-13 | 2.20E-12 |
| Pfkfb3       | 2148  | 230    | 710    | 3.837945 | 11.0537  | 1.526123 | Up | 3.86E-13 | 1.32E-12 |
| Fpgt         | 1797  | 353.5  | 1092   | 7.029748 | 20.24541 | 1.52605  | Up | 0        | 0        |
| LOC100910046 | 2052  | 63.5   | 195    | 1.102716 | 3.174916 | 1.525657 | Up | 0        | 0        |
| Rnf32        | 1959  | 116.5  | 358    | 2.124338 | 6.113262 | 1.524929 | Up | 9.68E-14 | 3.74E-13 |

|            |      |        |        |          |          |          |    |          |          |
|------------|------|--------|--------|----------|----------|----------|----|----------|----------|
| Map2k3     | 2356 | 1570   | 4852   | 23.87068 | 68.693   | 1.524924 | Up | 6.35E-12 | 1.70E-11 |
| RGD1566091 | 307  | 33.5   | 103.5  | 3.91309  | 11.25435 | 1.524102 | Up | 9.32E-10 | 2.24E-09 |
| Polb       | 1196 | 464    | 1429   | 13.87718 | 39.90615 | 1.523896 | Up | 0        | 0        |
| Ppp4r2     | 4848 | 4648   | 14289  | 34.18898 | 98.31372 | 1.523861 | Up | 2.40E-11 | 6.13E-11 |
| Taco1      | 1386 | 96     | 295    | 2.471873 | 7.107438 | 1.523725 | Up | 0        | 0        |
| Hus1       | 4469 | 573    | 1759.5 | 4.580691 | 13.14973 | 1.521396 | Up | 7.09E-13 | 2.29E-12 |
| Fastkd3    | 2286 | 354    | 1085   | 5.52167  | 15.84986 | 1.521294 | Up | 0        | 0        |
| LOC680322  | 389  | 15     | 46.5   | 1.38129  | 3.959733 | 1.519387 | Up | 5.79E-05 | 0.00011  |
| Tmem33     | 2263 | 1725.5 | 5281   | 27.15552 | 77.84001 | 1.519266 | Up | 3.79E-12 | 1.07E-11 |
| Ddx52      | 2175 | 1229.5 | 3770   | 20.19129 | 57.83861 | 1.5183   | Up | 3.28E-12 | 9.42E-12 |
| Inhba      | 1552 | 1100   | 3369   | 25.31749 | 72.48825 | 1.517613 | Up | 3.55E-12 | 1.01E-11 |
| Rspo1      | 1705 | 63.5   | 195    | 1.328485 | 3.803652 | 1.517603 | Up | 0        | 0        |
| Serac1     | 2141 | 176    | 540.5  | 2.938332 | 8.411967 | 1.517446 | Up | 0        | 0        |
| Atpaf2     | 1462 | 317.5  | 974.5  | 7.763334 | 22.22236 | 1.517264 | Up | 2.57E-13 | 9.19E-13 |
| LOC688133  | 5384 | 567    | 1737   | 3.759459 | 10.75797 | 1.516809 | Up | 0        | 0        |
| Xpa        | 1204 | 23.5   | 72     | 0.694855 | 1.988331 | 1.516774 | Up | 3.11E-07 | 6.79E-07 |
| Actl7b     | 1416 | 13.5   | 41.5   | 0.343786 | 0.982629 | 1.515136 | Up | 0.000114 | 0.000212 |
| Cox7b      | 473  | 1634.5 | 4957   | 122.5524 | 350.2106 | 1.514824 | Up | 5.32E-12 | 1.45E-11 |
| MGC125086  | 1109 | 58     | 177.5  | 1.873509 | 5.352218 | 1.514394 | Up | 1.55E-14 | 6.40E-14 |
| Tra2b      | 1978 | 6504.5 | 19873  | 117.4751 | 335.4333 | 1.513671 | Up | 1.08E-11 | 2.84E-11 |
| Med20      | 1813 | 473.5  | 1448.5 | 9.345325 | 26.67669 | 1.513263 | Up | 5.88E-13 | 1.94E-12 |
| Brix1      | 2456 | 1654   | 5041.5 | 24.02173 | 68.51737 | 1.512129 | Up | 4.25E-12 | 1.19E-11 |
| Lypla1     | 2356 | 2716   | 8260   | 41.0246  | 116.9923 | 1.511852 | Up | 0        | 0        |
| Wrap53     | 1782 | 546    | 1672.5 | 10.99156 | 31.32289 | 1.510821 | Up | 1.34E-13 | 5.05E-13 |
| LOC365839  | 1320 | 17.5   | 53.5   | 0.473313 | 1.348746 | 1.510752 | Up | 1.25E-05 | 2.51E-05 |



|              |      |        |        |          |          |          |    |          |          |
|--------------|------|--------|--------|----------|----------|----------|----|----------|----------|
| Olr780       | 939  | 9.5    | 29     | 0.359276 | 1.023448 | 1.510272 | Up | 0.001068 | 0.001808 |
| Tatdn3       | 1232 | 203    | 619    | 5.893774 | 16.7769  | 1.509212 | Up | 1.92E-13 | 7.01E-13 |
| Mospd1       | 2220 | 365    | 1106   | 5.852799 | 16.6369  | 1.507188 | Up | 6.76E-13 | 2.20E-12 |
| LOC500584    | 1320 | 327.5  | 996.5  | 8.874779 | 25.22531 | 1.507089 | Up | 6.83E-13 | 2.22E-12 |
| Zfx          | 3072 | 578    | 1749.5 | 6.685053 | 18.99573 | 1.506664 | Up | 1.55E-13 | 5.73E-13 |
| Smek2        | 5014 | 2718.5 | 8254.5 | 19.33898 | 54.94617 | 1.506507 | Up | 0        | 0        |
| LOC100362170 | 1503 | 23     | 69.5   | 0.546436 | 1.552518 | 1.506484 | Up | 1.10E-06 | 2.34E-06 |
| Gpx2         | 1028 | 8.5    | 26     | 0.297268 | 0.843538 | 1.504691 | Up | 0.001883 | 0.003135 |
| Pwwp2a       | 2897 | 299    | 908.5  | 3.688247 | 10.46343 | 1.504349 | Up | 6.08E-13 | 2.00E-12 |
| Tmem53       | 1291 | 31     | 94     | 0.859685 | 2.437925 | 1.503773 | Up | 9.61E-09 | 2.23E-08 |
| Zcrb1        | 1326 | 1010   | 3066   | 27.22889 | 77.11543 | 1.501881 | Up | 0        | 0        |
| RGD1305834   | 5622 | 406.5  | 1233   | 2.585632 | 7.321174 | 1.501558 | Up | 0        | 0        |
| Commd3       | 952  | 2306   | 6995.5 | 86.60554 | 245.1808 | 1.501315 | Up | 0        | 0        |
| Nfkb1        | 3723 | 2450   | 7419   | 23.52852 | 66.56341 | 1.500319 | Up | 0        | 0        |
| Pigh         | 2370 | 159.5  | 483.5  | 2.408317 | 6.8129   | 1.500244 | Up | 8.53E-14 | 3.33E-13 |
| Ublcp1       | 2115 | 914.5  | 2766.5 | 15.42492 | 43.63057 | 1.500077 | Up | 0        | 0        |
| Ccnh         | 1400 | 1235   | 3734.5 | 31.46639 | 88.99857 | 1.49997  | Up | 6.33E-12 | 1.70E-11 |
| Metnl        | 1380 | 939    | 2848.5 | 24.35356 | 68.85049 | 1.499334 | Up | 0        | 0        |
| LOC684762    | 735  | 54     | 164    | 2.639895 | 7.454472 | 1.497626 | Up | 6.53E-14 | 2.57E-13 |
| Kcnj13       | 1268 | 9      | 27     | 0.252173 | 0.711628 | 1.496709 | Up | 0.002566 | 0.004218 |
| LOC100911710 | 1587 | 11     | 33     | 0.246218 | 0.694811 | 1.496683 | Up | 0.000825 | 0.001414 |
| Trpm2        | 4527 | 15     | 45     | 0.117426 | 0.33128  | 1.496301 | Up | 8.85E-05 | 0.000165 |
| Mpp5         | 2703 | 831.5  | 2509.5 | 10.98339 | 30.98293 | 1.49615  | Up | 0        | 0        |
| Cxcr7        | 1958 | 304    | 919    | 5.545764 | 15.63538 | 1.495356 | Up | 0        | 0        |
| Ptafr        | 3370 | 14     | 42     | 0.148654 | 0.419035 | 1.495107 | Up | 0.000154 | 0.000281 |

|              |      |       |        |          |          |          |    |          |          |
|--------------|------|-------|--------|----------|----------|----------|----|----------|----------|
| Arhgap4      | 3195 | 69    | 208.5  | 0.771707 | 2.175243 | 1.495052 | Up | 0        | 0        |
| Notch4       | 6483 | 51.5  | 156    | 0.285274 | 0.80394  | 1.49474  | Up | 1.03E-13 | 3.97E-13 |
| Adhfe1       | 1884 | 34    | 102    | 0.642117 | 1.808522 | 1.493902 | Up | 2.90E-09 | 6.86E-09 |
| LOC688765    | 1899 | 164   | 492.5  | 3.082735 | 8.681757 | 1.493776 | Up | 1.50E-13 | 5.56E-13 |
| Cabyr        | 2076 | 26    | 78     | 0.446495 | 1.257019 | 1.493291 | Up | 2.17E-07 | 4.76E-07 |
| Znrd1        | 659  | 248.5 | 748.5  | 13.42768 | 37.79754 | 1.493082 | Up | 7.11E-14 | 2.79E-13 |
| Dclre1a      | 3540 | 579.5 | 1748   | 5.858302 | 16.48134 | 1.492279 | Up | 9.45E-13 | 3.00E-12 |
| Csgalnact2   | 3636 | 1474  | 4432   | 14.44184 | 40.62883 | 1.49225  | Up | 4.34E-12 | 1.21E-11 |
| Morc3        | 3847 | 1366  | 4103   | 12.662   | 35.62025 | 1.492192 | Up | 1.59E-12 | 4.85E-12 |
| Pdcd7        | 2255 | 252.5 | 759.5  | 4.000031 | 11.23793 | 1.490293 | Up | 1.17E-13 | 4.46E-13 |
| Tpcn2        | 2879 | 262   | 789.5  | 3.25661  | 9.145098 | 1.489628 | Up | 1.18E-13 | 4.49E-13 |
| Akirin1      | 2200 | 2112  | 6352.5 | 34.30707 | 96.32935 | 1.489469 | Up | 0        | 0        |
| Fam179b      | 6552 | 945   | 2833.5 | 5.145552 | 14.44056 | 1.488729 | Up | 2.03E-12 | 6.06E-12 |
| LOC684189    | 1327 | 149.5 | 448    | 4.024646 | 11.29253 | 1.488436 | Up | 2.66E-13 | 9.48E-13 |
| Mfap3        | 1932 | 286.5 | 859    | 5.293453 | 14.8476  | 1.487949 | Up | 3.49E-14 | 1.41E-13 |
| LOC688310    | 791  | 25    | 75     | 1.131674 | 3.173592 | 1.487658 | Up | 3.72E-07 | 8.09E-07 |
| LOC100910750 | 828  | 837.5 | 2508.5 | 36.08056 | 101.125  | 1.486846 | Up | 8.45E-13 | 2.70E-12 |
| Dcdc5        | 2859 | 44    | 131.5  | 0.546291 | 1.53075  | 1.486497 | Up | 2.07E-11 | 5.32E-11 |
| Pkp2         | 2861 | 1522  | 4579.5 | 19.05527 | 53.39341 | 1.486472 | Up | 4.68E-12 | 1.29E-11 |
| Akr1c12      | 1237 | 344   | 1031   | 9.924613 | 27.78828 | 1.485394 | Up | 5.51E-13 | 1.83E-12 |
| Snx2         | 2049 | 2229  | 6679   | 38.84079 | 108.7371 | 1.4852   | Up | 0        | 0        |
| Epha4        | 6338 | 152.5 | 457    | 0.859857 | 2.40607  | 1.48451  | Up | 1.08E-13 | 4.15E-13 |
| RGD1566380   | 1418 | 352.5 | 1062   | 8.924253 | 24.97052 | 1.484422 | Up | 6.43E-13 | 2.10E-12 |
| Aftph        | 3967 | 1689  | 5053   | 15.20726 | 42.54443 | 1.48421  | Up | 0        | 0        |
| Nfkbil1      | 1479 | 280   | 844    | 6.802294 | 19.02621 | 1.483895 | Up | 0        | 0        |

|              |       |        |        |          |          |          |    |          |          |
|--------------|-------|--------|--------|----------|----------|----------|----|----------|----------|
| LOC501738    | 681   | 8.5    | 25.5   | 0.442002 | 1.234968 | 1.482348 | Up | 0.00294  | 0.004807 |
| Shcbp1       | 2005  | 1549   | 4623   | 27.55634 | 76.97084 | 1.481928 | Up | 2.00E-12 | 5.98E-12 |
| Rpf2         | 1226  | 1006.5 | 3007   | 29.32127 | 81.89637 | 1.481852 | Up | 1.84E-12 | 5.53E-12 |
| Skil         | 2327  | 2589.5 | 7734   | 39.76276 | 111.0148 | 1.481263 | Up | 0        | 0        |
| Glb1l3       | 2331  | 32.5   | 97.5   | 0.498785 | 1.391662 | 1.480318 | Up | 5.61E-09 | 1.32E-08 |
| Mob3c        | 942   | 24     | 71     | 0.905587 | 2.523104 | 1.478274 | Up | 9.70E-07 | 2.06E-06 |
| Nfyb         | 2569  | 904    | 2694.5 | 12.57785 | 35.03375 | 1.477861 | Up | 0        | 0        |
| RGD1564776   | 1721  | 66     | 197    | 1.37228  | 3.82121  | 1.477455 | Up | 0        | 0        |
| LOC100361713 | 1252  | 62.5   | 185.5  | 1.777372 | 4.947048 | 1.476822 | Up | 0        | 0        |
| Ap1s3        | 2535  | 547.5  | 1629   | 7.692478 | 21.40691 | 1.476556 | Up | 0        | 0        |
| Zfp40        | 3424  | 137.5  | 406.5  | 1.431027 | 3.980926 | 1.476053 | Up | 2.87E-13 | 1.01E-12 |
| RGD1306595   | 1310  | 135.5  | 401.5  | 3.684828 | 10.24676 | 1.475499 | Up | 2.15E-13 | 7.78E-13 |
| LOC100911828 | 532   | 54     | 161.5  | 3.642912 | 10.12598 | 1.474897 | Up | 1.36E-13 | 5.11E-13 |
| LOC100912347 | 1191  | 10     | 30     | 0.302373 | 0.839466 | 1.473144 | Up | 0.001452 | 0.002438 |
| LOC100362820 | 11276 | 15     | 44.5   | 0.047347 | 0.13132  | 1.47175  | Up | 0.000135 | 0.000246 |
| Capns2       | 943   | 9      | 26.5   | 0.338475 | 0.938707 | 1.471625 | Up | 0.003936 | 0.006371 |
| Cript        | 1435  | 880.5  | 2605   | 21.8513  | 60.59369 | 1.471449 | Up | 1.52E-12 | 4.65E-12 |
| Tet2         | 5810  | 427.5  | 1271.5 | 2.634165 | 7.300633 | 1.470676 | Up | 1.02E-12 | 3.21E-12 |
| Slc16a3      | 2118  | 16     | 48     | 0.2714   | 0.751542 | 1.469433 | Up | 5.09E-05 | 9.72E-05 |
| Htr2a        | 1566  | 332.5  | 984.5  | 7.58026  | 20.98676 | 1.46916  | Up | 0        | 0        |
| Scfd1        | 2095  | 1828.5 | 5412.5 | 31.16304 | 86.23249 | 1.468396 | Up | 8.71E-13 | 2.78E-12 |
| Upp1         | 1153  | 211    | 626    | 6.547368 | 18.11192 | 1.467952 | Up | 2.52E-13 | 9.04E-13 |
| LOC498824    | 2156  | 156.5  | 464    | 2.598369 | 7.181113 | 1.466601 | Up | 1.64E-13 | 6.07E-13 |
| Dusp14       | 1371  | 271    | 805.5  | 7.086929 | 19.5858  | 1.466575 | Up | 8.22E-14 | 3.21E-13 |
| Asb3         | 2232  | 244    | 720.5  | 3.900483 | 10.77601 | 1.466098 | Up | 2.85E-13 | 1.01E-12 |

|              |      |        |         |          |          |          |    |          |          |
|--------------|------|--------|---------|----------|----------|----------|----|----------|----------|
| LOC100909405 | 2203 | 379    | 1120.5  | 6.148011 | 16.9836  | 1.465951 | Up | 4.40E-14 | 1.76E-13 |
| Hspb2        | 549  | 7.5    | 22.5    | 0.490409 | 1.354377 | 1.465573 | Up | 0.005232 | 0.00839  |
| Mrs2         | 1949 | 275    | 813     | 5.044235 | 13.92641 | 1.465116 | Up | 5.96E-13 | 1.97E-12 |
| Ppil1        | 1325 | 974    | 2886.5  | 26.37113 | 72.80248 | 1.465028 | Up | 3.08E-13 | 1.08E-12 |
| RGD1562502   | 1629 | 1341.5 | 3963    | 29.42513 | 81.22943 | 1.464954 | Up | 4.62E-12 | 1.28E-11 |
| Chm          | 3482 | 851.5  | 2516    | 8.725438 | 24.08383 | 1.464766 | Up | 1.69E-12 | 5.12E-12 |
| Prom2        | 4294 | 33     | 97      | 0.274599 | 0.757341 | 1.463618 | Up | 1.13E-08 | 2.62E-08 |
| Espnl        | 3000 | 112    | 333     | 1.341642 | 3.700236 | 1.463618 | Up | 0        | 0        |
| Lymr1        | 1685 | 100    | 295.5   | 2.126357 | 5.864423 | 1.463606 | Up | 1.75E-14 | 7.19E-14 |
| Ccdc115      | 1100 | 256.5  | 759     | 8.337483 | 22.99353 | 1.463544 | Up | 0        | 0        |
| Bhlhe40      | 2388 | 4080   | 12059.5 | 61.13646 | 168.5805 | 1.463333 | Up | 1.72E-11 | 4.45E-11 |
| Zfp131       | 2455 | 1145.5 | 3385    | 16.67854 | 45.98927 | 1.463304 | Up | 4.30E-12 | 1.20E-11 |
| Cog4         | 2773 | 1267.5 | 3742.5  | 16.34    | 45.04901 | 1.463088 | Up | 3.13E-12 | 9.03E-12 |
| E4f1         | 2595 | 366.5  | 1083    | 5.050574 | 13.92328 | 1.46298  | Up | 0        | 0        |
| Tdp2         | 1966 | 441.5  | 1299.5  | 8.000318 | 22.0529  | 1.462839 | Up | 3.59E-13 | 1.25E-12 |
| Lmbrd1       | 2576 | 912.5  | 2688    | 12.63269 | 34.80836 | 1.462272 | Up | 0        | 0        |
| Ddx28        | 1931 | 237.5  | 702.5   | 4.403027 | 12.13008 | 1.462021 | Up | 2.75E-13 | 9.80E-13 |
| Narf         | 3053 | 635.5  | 1876.5  | 7.444265 | 20.5078  | 1.461971 | Up | 1.34E-12 | 4.13E-12 |
| Cyld         | 3267 | 1047   | 3082    | 11.43402 | 31.48493 | 1.461328 | Up | 3.61E-12 | 1.03E-11 |
| Trpc2        | 4233 | 133.5  | 394     | 1.12968  | 3.109923 | 1.460965 | Up | 1.20E-13 | 4.54E-13 |
| Gpn3         | 1176 | 388.5  | 1146    | 11.8054  | 32.48689 | 1.460411 | Up | 6.64E-13 | 2.16E-12 |
| Cep63        | 2795 | 513.5  | 1512.5  | 6.56028  | 18.04633 | 1.459876 | Up | 0        | 0        |
| Cdk5rap1     | 1975 | 327.5  | 966.5   | 5.934692 | 16.3163  | 1.459069 | Up | 6.83E-13 | 2.21E-12 |
| LOC100360950 | 323  | 14     | 41      | 1.543875 | 4.243527 | 1.458708 | Up | 0.000235 | 0.000424 |
| lfngr1       | 1860 | 1578.5 | 4649    | 30.34129 | 83.38037 | 1.458425 | Up | 2.08E-12 | 6.19E-12 |

|              |      |        |         |          |          |          |    |          |          |
|--------------|------|--------|---------|----------|----------|----------|----|----------|----------|
| LOC311026    | 5717 | 553    | 1630    | 3.462582 | 9.509306 | 1.457492 | Up | 6.00E-13 | 1.97E-12 |
| RGD1563556   | 3714 | 100    | 293     | 0.9593   | 2.634151 | 1.457284 | Up | 1.75E-14 | 7.19E-14 |
| RGD1564519   | 1099 | 1645.5 | 4812.5  | 53.30245 | 146.3267 | 1.45692  | Up | 5.18E-12 | 1.42E-11 |
| Hs3st2       | 2292 | 9      | 26.5    | 0.139259 | 0.382286 | 1.456882 | Up | 0.003936 | 0.006371 |
| Kittlg       | 5276 | 4282.5 | 12548   | 28.92609 | 79.38753 | 1.456541 | Up | 2.28E-11 | 5.83E-11 |
| Ttc22        | 2553 | 9      | 27      | 0.127268 | 0.349214 | 1.456237 | Up | 0.002566 | 0.004218 |
| Dhrs7b       | 1235 | 693.5  | 2038.5  | 20.07718 | 55.07754 | 1.455908 | Up | 1.17E-12 | 3.63E-12 |
| LOC100910487 | 879  | 22     | 64      | 0.89038  | 2.442157 | 1.455664 | Up | 4.35E-06 | 8.92E-06 |
| Mertk        | 3024 | 43     | 126     | 0.507495 | 1.391712 | 1.455396 | Up | 7.98E-11 | 1.99E-10 |
| RGD1309058   | 1892 | 18     | 53      | 0.341039 | 0.934779 | 1.454689 | Up | 2.57E-05 | 5.04E-05 |
| RGD1309095   | 1949 | 555.5  | 1622    | 10.14723 | 27.794   | 1.453688 | Up | 0        | 0        |
| Rabgef1      | 2826 | 701    | 2052.5  | 8.851614 | 24.23725 | 1.453214 | Up | 1.61E-13 | 5.97E-13 |
| Pan3         | 3083 | 1314.5 | 3853    | 15.23208 | 41.6927  | 1.452682 | Up | 4.51E-12 | 1.25E-11 |
| Ido2         | 1252 | 152.5  | 446.5   | 4.3611   | 11.92649 | 1.451405 | Up | 1.08E-13 | 4.15E-13 |
| RGD1310553   | 3465 | 1088.5 | 3178.5  | 11.1916  | 30.60613 | 1.451405 | Up | 2.48E-12 | 7.29E-12 |
| LOC100912163 | 5840 | 601.5  | 1758.5  | 3.674308 | 10.04773 | 1.451326 | Up | 1.08E-13 | 4.17E-13 |
| Snapc1       | 1692 | 365    | 1065.5  | 7.698862 | 21.03871 | 1.450329 | Up | 6.76E-13 | 2.20E-12 |
| Zfp207       | 1815 | 4482.5 | 13150.5 | 88.46331 | 241.7209 | 1.450191 | Up | 1.90E-11 | 4.89E-11 |
| Adcy7        | 4164 | 10     | 29      | 0.085384 | 0.233169 | 1.449343 | Up | 0.002223 | 0.003672 |
| Trappc6b     | 1165 | 759.5  | 2217.5  | 23.27382 | 63.53528 | 1.44885  | Up | 1.87E-12 | 5.61E-12 |
| Mettl20      | 1632 | 138    | 404     | 3.024031 | 8.253843 | 1.448593 | Up | 1.83E-13 | 6.73E-13 |
| Fosl1        | 1663 | 3136.5 | 9203.5  | 67.67083 | 184.6985 | 1.448566 | Up | 0        | 0        |
| Sdccag8      | 2550 | 224    | 653     | 3.134766 | 8.554584 | 1.44834  | Up | 7.97E-14 | 3.12E-13 |
| Dhrs9        | 1636 | 3278   | 9580.5  | 71.63496 | 195.4563 | 1.44811  | Up | 0        | 0        |
| Zfp287       | 5339 | 267.5  | 780.5   | 1.790109 | 4.884053 | 1.448031 | Up | 7.08E-13 | 2.29E-12 |

|              |      |        |         |          |          |          |    |          |          |
|--------------|------|--------|---------|----------|----------|----------|----|----------|----------|
| Ero1l        | 2361 | 3438   | 10026   | 51.98307 | 141.8238 | 1.447986 | Up | 0        | 0        |
| Jazf1        | 2861 | 236.5  | 690     | 2.953053 | 8.056449 | 1.447937 | Up | 4.41E-13 | 1.49E-12 |
| Blzf1        | 2206 | 402    | 1173.5  | 6.51325  | 17.76753 | 1.447794 | Up | 1.18E-14 | 4.87E-14 |
| Shroom4      | 4741 | 451.5  | 1319.5  | 3.405026 | 9.28708  | 1.447559 | Up | 2.05E-12 | 6.11E-12 |
| Taf13        | 1727 | 1378.5 | 4006    | 28.40746 | 77.44764 | 1.446952 | Up | 4.03E-12 | 1.13E-11 |
| Fgf9         | 1065 | 57     | 166     | 1.918928 | 5.229307 | 1.446319 | Up | 1.56E-13 | 5.79E-13 |
| Fastkd5-ps1  | 2975 | 455.5  | 1325    | 5.457252 | 14.85947 | 1.445136 | Up | 3.90E-13 | 1.34E-12 |
| Azin1        | 4269 | 5225.5 | 15201.5 | 43.64658 | 118.8296 | 1.444953 | Up | 1.70E-11 | 4.41E-11 |
| Ppp2r3c      | 1704 | 563.5  | 1638.5  | 11.78899 | 32.09263 | 1.444801 | Up | 1.35E-13 | 5.07E-13 |
| Tcf7l2       | 4017 | 1122   | 3270.5  | 10.00086 | 27.21631 | 1.444348 | Up | 2.95E-12 | 8.57E-12 |
| RGD1562747   | 1038 | 232    | 675.5   | 7.988955 | 21.7328  | 1.443795 | Up | 3.80E-13 | 1.31E-12 |
| Tmem135      | 3420 | 481.5  | 1403.5  | 5.03631  | 13.69326 | 1.443027 | Up | 3.30E-13 | 1.15E-12 |
| Zfp111       | 2817 | 268    | 779     | 3.398598 | 9.239981 | 1.44295  | Up | 1.39E-13 | 5.23E-13 |
| LOC100910342 | 814  | 284    | 824.5   | 12.44441 | 33.83019 | 1.442813 | Up | 1.18E-13 | 4.50E-13 |
| LOC100910558 | 1574 | 34.5   | 100     | 0.78086  | 2.121716 | 1.442096 | Up | 6.60E-09 | 1.54E-08 |
| Arhgef3      | 3617 | 256.5  | 746     | 2.534639 | 6.885723 | 1.441828 | Up | 0        | 0        |
| Zbtb9        | 2786 | 146.5  | 427     | 1.879683 | 5.10609  | 1.44173  | Up | 3.33E-14 | 1.35E-13 |
| Gpr132       | 2402 | 39     | 113.5   | 0.581232 | 1.57854  | 1.441405 | Up | 1.02E-09 | 2.44E-09 |
| Pdzm4        | 3368 | 20     | 58.5    | 0.212149 | 0.576033 | 1.441073 | Up | 1.30E-05 | 2.59E-05 |
| RGD1563941   | 415  | 26     | 75      | 2.228023 | 6.044605 | 1.439884 | Up | 7.44E-07 | 1.59E-06 |
| Nup54        | 2277 | 1059   | 3069.5  | 16.60726 | 45.01031 | 1.438441 | Up | 2.72E-12 | 7.95E-12 |
| Krit1        | 3045 | 1538   | 4458.5  | 18.04439 | 48.90179 | 1.438337 | Up | 1.46E-12 | 4.47E-12 |
| LOC688411    | 1380 | 7.5    | 22      | 0.193851 | 0.525079 | 1.437589 | Up | 0.005232 | 0.00839  |
| Hist1h2bh    | 949  | 307.5  | 893.5   | 11.60162 | 31.42336 | 1.437511 | Up | 4.91E-14 | 1.95E-13 |
| Gtf2b        | 1227 | 1220.5 | 3542    | 35.58269 | 96.33935 | 1.43695  | Up | 7.20E-12 | 1.92E-11 |

|           |      |        |        |          |          |          |    |          |          |
|-----------|------|--------|--------|----------|----------|----------|----|----------|----------|
| Ftsjd1    | 3553 | 381    | 1107.5 | 3.836348 | 10.38352 | 1.43649  | Up | 3.02E-13 | 1.06E-12 |
| Vhl       | 2807 | 663    | 1917.5 | 8.428131 | 22.80747 | 1.436222 | Up | 2.84E-13 | 1.01E-12 |
| Dnase1l2  | 1209 | 12     | 35     | 0.35422  | 0.958344 | 1.435898 | Up | 0.000718 | 0.001235 |
| Ccndbp1   | 1452 | 337    | 974    | 8.274652 | 22.37228 | 1.434942 | Up | 0        | 0        |
| Fscn2     | 1710 | 20     | 58     | 0.418517 | 1.131366 | 1.434706 | Up | 1.30E-05 | 2.59E-05 |
| Zfp410    | 3345 | 983    | 2844   | 10.50161 | 28.37901 | 1.434213 | Up | 3.73E-13 | 1.29E-12 |
| MGC114464 | 1463 | 25.5   | 73.5   | 0.618408 | 1.670868 | 1.433967 | Up | 8.51E-07 | 1.82E-06 |
| Efcab7    | 2157 | 628    | 1812.5 | 10.37372 | 28.02677 | 1.433873 | Up | 5.00E-13 | 1.68E-12 |
| Golph3l   | 1920 | 253    | 731.5  | 4.705331 | 12.70901 | 1.433484 | Up | 3.97E-13 | 1.36E-12 |
| Orc5      | 2115 | 607    | 1752.5 | 10.25262 | 27.69108 | 1.433429 | Up | 0        | 0        |
| Wdr53     | 1459 | 273    | 789.5  | 6.684949 | 18.05314 | 1.433262 | Up | 2.09E-13 | 7.60E-13 |
| Galr2     | 1159 | 40     | 116    | 1.234969 | 3.333796 | 1.432691 | Up | 5.95E-10 | 1.44E-09 |
| Sgip1     | 4233 | 470.5  | 1362   | 3.974818 | 10.72928 | 1.432593 | Up | 1.65E-12 | 5.01E-12 |
| Piga      | 759  | 105.5  | 304.5  | 4.971178 | 13.41507 | 1.432194 | Up | 0        | 0        |
| Alpk1     | 3719 | 32     | 93     | 0.308204 | 0.831265 | 1.431423 | Up | 2.91E-08 | 6.63E-08 |
| Mipol1    | 1875 | 273    | 786.5  | 5.191383 | 13.99865 | 1.431097 | Up | 2.09E-13 | 7.61E-13 |
| Gnpda2    | 1825 | 189    | 545    | 3.699172 | 9.972774 | 1.430792 | Up | 2.87E-13 | 1.02E-12 |
| LOC290876 | 1454 | 26.5   | 75.5   | 0.642902 | 1.732706 | 1.430355 | Up | 7.44E-07 | 1.59E-06 |
| Cgref1    | 1349 | 236    | 681.5  | 6.259226 | 16.86899 | 1.430317 | Up | 4.41E-13 | 1.49E-12 |
| LOC362473 | 1326 | 14     | 40.5   | 0.373045 | 1.00514  | 1.429975 | Up | 0.000355 | 0.000635 |
| Zfand1    | 1621 | 563.5  | 1618.5 | 12.36149 | 33.30117 | 1.42972  | Up | 1.35E-13 | 5.08E-13 |
| Crybb1    | 1006 | 18.5   | 53.5   | 0.660607 | 1.779567 | 1.429663 | Up | 2.57E-05 | 5.04E-05 |
| Brd8      | 3318 | 1792.5 | 5167   | 19.33663 | 52.0219  | 1.427783 | Up | 0        | 0        |
| Celf3     | 3234 | 33.5   | 97     | 0.37182  | 1.000006 | 1.427333 | Up | 1.13E-08 | 2.62E-08 |
| Smad3     | 4677 | 1953.5 | 5638   | 14.94388 | 40.18707 | 1.427177 | Up | 1.94E-12 | 5.81E-12 |

|              |      |        |         |          |          |          |    |          |          |
|--------------|------|--------|---------|----------|----------|----------|----|----------|----------|
| Timm10       | 1167 | 264    | 758.5   | 8.05512  | 21.66105 | 1.427125 | Up | 6.88E-14 | 2.71E-13 |
| Rpusd2       | 3169 | 136.5  | 393     | 1.5376   | 4.134748 | 1.427119 | Up | 1.95E-13 | 7.11E-13 |
| Rps27l       | 698  | 4150   | 11915.5 | 211.7178 | 569.1382 | 1.426636 | Up | 3.29E-11 | 8.33E-11 |
| Cnot7        | 2614 | 1569   | 4502.5  | 21.3858  | 57.48132 | 1.42644  | Up | 0        | 0        |
| RGD1564036   | 1173 | 102.5  | 293.5   | 3.12415  | 8.396403 | 1.426308 | Up | 0        | 0        |
| Gosr1        | 2726 | 1042.5 | 3003.5  | 13.67937 | 36.76388 | 1.426287 | Up | 1.99E-12 | 5.95E-12 |
| Inha         | 1471 | 10     | 28.5    | 0.239749 | 0.644102 | 1.425762 | Up | 0.003379 | 0.005507 |
| Prss36       | 2742 | 44     | 127     | 0.575875 | 1.54669  | 1.425356 | Up | 1.05E-10 | 2.60E-10 |
| Tmsbl1       | 412  | 351    | 1003.5  | 30.27924 | 81.29445 | 1.424828 | Up | 9.48E-14 | 3.68E-13 |
| lws1         | 3010 | 1525.5 | 4385.5  | 18.10036 | 48.58715 | 1.424556 | Up | 8.43E-12 | 2.23E-11 |
| Bet1         | 1455 | 864.5  | 2473.5  | 21.15114 | 56.74737 | 1.423818 | Up | 0        | 0        |
| Ypel5        | 2144 | 744    | 2129.5  | 12.36168 | 33.15577 | 1.423385 | Up | 0        | 0        |
| Arhgap10     | 2618 | 836    | 2403    | 11.43074 | 30.65527 | 1.423216 | Up | 9.49E-13 | 3.01E-12 |
| Uba5         | 1463 | 2055.5 | 5913.5  | 50.27998 | 134.7905 | 1.422663 | Up | 0        | 0        |
| Tor1aip2     | 2289 | 3751   | 10760   | 58.51172 | 156.8288 | 1.422393 | Up | 6.74E-13 | 2.19E-12 |
| Klhl24       | 4636 | 503    | 1440.5  | 3.869199 | 10.36901 | 1.422172 | Up | 3.35E-13 | 1.17E-12 |
| LOC100912083 | 968  | 55     | 157.5   | 2.018328 | 5.408545 | 1.42208  | Up | 9.73E-13 | 3.08E-12 |
| LOC687679    | 424  | 1079   | 3083    | 90.59093 | 242.7567 | 1.422073 | Up | 2.91E-12 | 8.45E-12 |
| LOC685574    | 2185 | 161    | 463.5   | 2.637971 | 7.066836 | 1.421635 | Up | 0        | 0        |
| Llph         | 1102 | 658    | 1882.5  | 21.314   | 57.08024 | 1.42119  | Up | 1.51E-12 | 4.63E-12 |
| LOC682147    | 1818 | 214    | 615.5   | 4.212739 | 11.28137 | 1.421112 | Up | 0        | 0        |
| LOC100911263 | 801  | 52.5   | 150     | 2.338542 | 6.262325 | 1.421089 | Up | 2.25E-12 | 6.66E-12 |
| Eno2         | 2222 | 942.5  | 2700    | 15.15886 | 40.59212 | 1.421039 | Up | 1.62E-13 | 5.99E-13 |
| LOC688324    | 3077 | 324.5  | 931.5   | 3.773415 | 10.09768 | 1.420081 | Up | 0        | 0        |
| LOC682138    | 2196 | 9      | 26      | 0.147436 | 0.39447  | 1.419829 | Up | 0.003936 | 0.00637  |



|              |      |        |         |          |          |          |    |          |          |
|--------------|------|--------|---------|----------|----------|----------|----|----------|----------|
| Mphosph8     | 2877 | 1214   | 3472    | 15.07025 | 40.30977 | 1.419426 | Up | 4.15E-12 | 1.16E-11 |
| Brf2         | 1869 | 226.5  | 651.5   | 4.342781 | 11.60747 | 1.418362 | Up | 3.18E-14 | 1.29E-13 |
| Cyr61        | 1987 | 15554  | 44611.5 | 280.3998 | 749.1121 | 1.417696 | Up | 0        | 0        |
| RGD1307399   | 1615 | 927    | 2642.5  | 20.4687  | 54.64526 | 1.416677 | Up | 2.08E-12 | 6.19E-12 |
| Socs6        | 2944 | 966    | 2760    | 11.72306 | 31.28088 | 1.415931 | Up | 0        | 0        |
| Mlit11       | 1406 | 472.5  | 1347.5  | 11.99859 | 32.01144 | 1.415723 | Up | 1.71E-13 | 6.32E-13 |
| Med28        | 2089 | 1112.5 | 3181    | 19.03788 | 50.78681 | 1.415581 | Up | 4.84E-12 | 1.33E-11 |
| RGD1560492   | 3091 | 92.5   | 261.5   | 1.057384 | 2.820317 | 1.415358 | Up | 6.66E-15 | 2.79E-14 |
| Ap4e1        | 3448 | 300    | 855.5   | 3.105407 | 8.282067 | 1.415208 | Up | 2.14E-13 | 7.76E-13 |
| LOC100363723 | 969  | 20     | 56.5    | 0.729092 | 1.944381 | 1.415139 | Up | 2.93E-05 | 5.70E-05 |
| Ppp1r36      | 1463 | 13.5   | 39      | 0.331566 | 0.883859 | 1.414521 | Up | 0.000269 | 0.000483 |
| Plag1        | 3360 | 265.5  | 756     | 2.822138 | 7.518729 | 1.4137   | Up | 6.59E-13 | 2.15E-12 |
| Acyp1        | 552  | 412    | 1166    | 26.50209 | 70.55131 | 1.412567 | Up | 2.14E-13 | 7.77E-13 |
| H2afj        | 510  | 141.5  | 404     | 9.92978  | 26.41759 | 1.411665 | Up | 0        | 0        |
| LOC100359967 | 3451 | 177    | 503.5   | 1.828657 | 4.864998 | 1.411655 | Up | 0        | 0        |
| Rngt         | 4139 | 1189   | 3386.5  | 10.26841 | 27.31826 | 1.411652 | Up | 3.07E-12 | 8.87E-12 |
| Pfkfb2       | 1862 | 213.5  | 611.5   | 4.114206 | 10.945   | 1.411586 | Up | 2.80E-13 | 9.94E-13 |
| Dnajb6       | 2474 | 2314   | 6597    | 33.48665 | 89.05283 | 1.411075 | Up | 0        | 0        |
| Efcab1       | 1198 | 16     | 46      | 0.475992 | 1.265436 | 1.410627 | Up | 0.000117 | 0.000216 |
| Ctca4l       | 2899 | 13     | 37      | 0.160265 | 0.425806 | 1.409736 | Up | 0.000621 | 0.001073 |
| Riok1        | 2085 | 757.5  | 2154.5  | 12.98237 | 34.48352 | 1.409353 | Up | 8.99E-13 | 2.86E-12 |
| LOC296884    | 2452 | 307.5  | 875.5   | 4.490421 | 11.927   | 1.409309 | Up | 4.91E-14 | 1.95E-13 |
| LOC680430    | 395  | 473.5  | 1363    | 43.15227 | 114.6155 | 1.409294 | Up | 5.88E-13 | 1.94E-12 |
| Nkrf         | 1689 | 128    | 363.5   | 2.705024 | 7.184047 | 1.409156 | Up | 3.69E-14 | 1.48E-13 |
| Clcna        | 2394 | 11     | 31.5    | 0.166334 | 0.441744 | 1.409129 | Up | 0.001915 | 0.003187 |

|              |      |        |        |          |          |          |    |          |          |
|--------------|------|--------|--------|----------|----------|----------|----|----------|----------|
| Nup35        | 1539 | 1660   | 4727   | 38.60219 | 102.4941 | 1.408787 | Up | 3.43E-12 | 9.82E-12 |
| Krt23        | 1269 | 8.5    | 24     | 0.238101 | 0.632138 | 1.408665 | Up | 0.004557 | 0.007328 |
| Smarcad1     | 4795 | 1503.5 | 4262.5 | 11.18506 | 29.68858 | 1.408335 | Up | 2.81E-12 | 8.20E-12 |
| Fbxo38       | 4381 | 1106.5 | 3142   | 9.021269 | 23.94318 | 1.408212 | Up | 2.42E-12 | 7.13E-12 |
| Jarid1a      | 9470 | 2959   | 8402   | 11.15269 | 29.59997 | 1.408204 | Up | 0        | 0        |
| Magohb       | 630  | 248    | 700.5  | 13.99781 | 37.14653 | 1.408027 | Up | 7.11E-14 | 2.79E-13 |
| Recql5       | 3905 | 255    | 723.5  | 2.330216 | 6.178952 | 1.406898 | Up | 0        | 0        |
| Snrpg        | 462  | 714.5  | 2024   | 55.15577 | 146.2446 | 1.4068   | Up | 5.15E-13 | 1.72E-12 |
| Itga2        | 4379 | 400    | 1131   | 3.257883 | 8.635005 | 1.406262 | Up | 0        | 0        |
| Ap4b1        | 2921 | 459    | 1301.5 | 5.613089 | 14.87713 | 1.406229 | Up | 1.20E-12 | 3.71E-12 |
| Col27a1      | 5568 | 524    | 1489   | 3.374946 | 8.944822 | 1.406188 | Up | 0        | 0        |
| Ucn2         | 911  | 83     | 236    | 3.26394  | 8.647077 | 1.405598 | Up | 1.43E-13 | 5.34E-13 |
| Ccdc85b      | 1561 | 1027   | 2934   | 23.62669 | 62.58603 | 1.405423 | Up | 0        | 0        |
| Mmadhc       | 1332 | 1005   | 2843   | 26.8983  | 71.23934 | 1.405159 | Up | 8.95E-13 | 2.85E-12 |
| LOC100912594 | 3169 | 206    | 582.5  | 2.314499 | 6.124256 | 1.403835 | Up | 2.46E-13 | 8.83E-13 |
| RGD1565370   | 483  | 13     | 37     | 0.96311  | 2.548265 | 1.403743 | Up | 0.000621 | 0.001073 |
| Thumpd2      | 1876 | 155    | 440    | 2.958338 | 7.826757 | 1.403628 | Up | 3.73E-13 | 1.29E-12 |
| Pla1a        | 1743 | 22.5   | 64     | 0.461424 | 1.220227 | 1.402984 | Up | 4.35E-06 | 8.92E-06 |
| LOC100910555 | 1625 | 17     | 48.5   | 0.374701 | 0.990652 | 1.402641 | Up | 0.000101 | 0.000189 |
| Ptprcap      | 860  | 9      | 25.5   | 0.375142 | 0.991528 | 1.402214 | Up | 0.005991 | 0.00957  |
| RGD1309870   | 747  | 40.5   | 115    | 1.948115 | 5.148305 | 1.402018 | Up | 8.90E-10 | 2.14E-09 |
| Tk2          | 2389 | 250    | 706    | 3.734982 | 9.868769 | 1.401769 | Up | 2.66E-13 | 9.47E-13 |
| Pced1a       | 1137 | 399    | 1130   | 12.57382 | 33.19947 | 1.400737 | Up | 0        | 0        |
| Gpatc2       | 1392 | 248    | 702    | 6.380941 | 16.84249 | 1.400264 | Up | 7.11E-14 | 2.79E-13 |
| Snx14        | 2955 | 862    | 2431   | 10.40685 | 27.46583 | 1.400104 | Up | 0        | 0        |

|              |      |        |        |          |          |          |    |          |          |
|--------------|------|--------|--------|----------|----------|----------|----|----------|----------|
| Snrpa1       | 1040 | 1260.5 | 3554   | 43.24287 | 114.1077 | 1.399862 | Up | 2.88E-12 | 8.37E-12 |
| Ctnna1       | 3643 | 158.5  | 447    | 1.553004 | 4.095362 | 1.39893  | Up | 1.62E-14 | 6.66E-14 |
| LOC686779    | 3415 | 163    | 460.5  | 1.703757 | 4.492204 | 1.398704 | Up | 2.37E-13 | 8.51E-13 |
| Fbxo24       | 2095 | 14     | 39.5   | 0.238577 | 0.628844 | 1.398249 | Up | 0.000536 | 0.000944 |
| Syap1        | 1491 | 1243.5 | 3512.5 | 29.80009 | 78.54374 | 1.39818  | Up | 7.86E-12 | 2.08E-11 |
| Hist2h4      | 396  | 16.5   | 47.5   | 1.506173 | 3.969503 | 1.398071 | Up | 7.74E-05 | 0.000145 |
| Rab27a       | 2704 | 70     | 196.5  | 0.9221   | 2.429719 | 1.397795 | Up | 0        | 0        |
| Pidd         | 3321 | 169    | 477.5  | 1.820775 | 4.796222 | 1.397346 | Up | 8.88E-15 | 3.70E-14 |
| Slc22a5      | 3037 | 410.5  | 1154.5 | 4.83527  | 12.71657 | 1.395041 | Up | 1.10E-12 | 3.45E-12 |
| Kat8         | 1558 | 473    | 1334.5 | 10.86432 | 28.57224 | 1.395016 | Up | 5.88E-13 | 1.94E-12 |
| RGD1306286   | 9804 | 825    | 2322.5 | 3.00862  | 7.910987 | 1.394756 | Up | 0        | 0        |
| Tasp1        | 1990 | 136.5  | 384.5  | 2.452029 | 6.446572 | 1.394556 | Up | 1.95E-13 | 7.10E-13 |
| Slc33a1      | 1994 | 916    | 2574   | 16.3857  | 43.07781 | 1.394508 | Up | 0        | 0        |
| RGD1304595   | 3795 | 265    | 745.5  | 2.492351 | 6.551836 | 1.394392 | Up | 6.59E-13 | 2.15E-12 |
| Gpatch4      | 1903 | 510.5  | 1436.5 | 9.58944  | 25.2031  | 1.394083 | Up | 0        | 0        |
| LOC100910054 | 3332 | 534    | 1499.5 | 5.721    | 15.03601 | 1.394082 | Up | 0        | 0        |
| Il2rg        | 1611 | 35.5   | 100    | 0.788697 | 2.072428 | 1.393778 | Up | 1.30E-08 | 3.00E-08 |
| Bud13        | 2207 | 565    | 1592.5 | 9.174928 | 24.05883 | 1.390798 | Up | 4.35E-13 | 1.48E-12 |
| LOC100911956 | 1077 | 618.5  | 1733.5 | 20.5174  | 53.79795 | 1.390703 | Up | 2.89E-15 | 1.22E-14 |
| MacroD2      | 1144 | 53     | 149.5  | 1.6618   | 4.357149 | 1.390638 | Up | 6.38E-12 | 1.71E-11 |
| Kdm5b        | 6276 | 1292.5 | 3621.5 | 7.347342 | 19.26157 | 1.390431 | Up | 5.07E-12 | 1.39E-11 |
| LOC100362237 | 333  | 26     | 73     | 2.776666 | 7.278489 | 1.390285 | Up | 1.67E-06 | 3.50E-06 |
| LOC100912086 | 358  | 428.5  | 1190   | 42.36622 | 111.0388 | 1.390078 | Up | 2.52E-13 | 9.04E-13 |
| Tmco1        | 1181 | 1846   | 5187   | 55.8928  | 146.4632 | 1.389804 | Up | 4.55E-12 | 1.26E-11 |
| Dbr1         | 1942 | 919    | 2575   | 16.89774 | 44.24848 | 1.388798 | Up | 1.36E-12 | 4.18E-12 |

|              |      |        |        |          |          |          |    |          |          |
|--------------|------|--------|--------|----------|----------|----------|----|----------|----------|
| Pcmd2        | 3547 | 647    | 1810.5 | 6.505311 | 17.03444 | 1.388765 | Up | 0        | 0        |
| Pet112l      | 1825 | 547.5  | 1536   | 10.73293 | 28.09882 | 1.388466 | Up | 0        | 0        |
| Snape4       | 4352 | 267.5  | 753    | 2.206106 | 5.775475 | 1.388438 | Up | 7.08E-13 | 2.29E-12 |
| LOC691280    | 1377 | 300.5  | 839.5  | 7.768718 | 20.33593 | 1.388283 | Up | 2.14E-13 | 7.75E-13 |
| Gpr176       | 3824 | 940    | 2634.5 | 8.781692 | 22.97968 | 1.387788 | Up | 0        | 0        |
| Braf         | 3906 | 659    | 1845.5 | 6.025857 | 15.76751 | 1.387717 | Up | 0        | 0        |
| Tsga10       | 3030 | 27     | 75.5   | 0.318293 | 0.832658 | 1.38737  | Up | 1.45E-06 | 3.05E-06 |
| Vldlr        | 3417 | 346    | 967    | 3.611942 | 9.44678  | 1.387048 | Up | 3.04E-13 | 1.07E-12 |
| LOC100912122 | 549  | 456    | 1273.5 | 29.6631  | 77.56204 | 1.386681 | Up | 1.95E-12 | 5.82E-12 |
| Atrip        | 2549 | 208.5  | 583    | 2.922567 | 7.64002  | 1.386341 | Up | 3.49E-13 | 1.21E-12 |
| LOC100911690 | 765  | 33.5   | 93.5   | 1.556859 | 4.064727 | 1.384521 | Up | 5.69E-08 | 1.28E-07 |
| Prkab2       | 1758 | 121.5  | 338    | 2.467365 | 6.441606 | 1.384449 | Up | 0        | 0        |
| LOC100910318 | 858  | 276    | 765.5  | 11.42247 | 29.81731 | 1.384276 | Up | 7.04E-14 | 2.77E-13 |
| Cdh17        | 3411 | 103.5  | 287    | 1.081484 | 2.822608 | 1.384017 | Up | 0        | 0        |
| Gmeb2        | 1964 | 399    | 1121   | 7.288294 | 19.02195 | 1.384012 | Up | 0        | 0        |
| Plekhd1      | 3303 | 46     | 129    | 0.499212 | 1.302573 | 1.383641 | Up | 1.78E-10 | 4.37E-10 |
| Rufy3        | 1903 | 159.5  | 443.5  | 2.985462 | 7.785865 | 1.382903 | Up | 8.53E-14 | 3.33E-13 |
| Ehf          | 2359 | 13.5   | 38     | 0.205387 | 0.535523 | 1.382606 | Up | 0.00041  | 0.000729 |
| Fbxl12       | 1926 | 219.5  | 612    | 4.06753  | 10.59114 | 1.380632 | Up | 3.38E-13 | 1.18E-12 |
| Rab40c       | 846  | 110    | 308    | 4.654022 | 12.11777 | 1.380575 | Up | 0        | 0        |
| LOC100910762 | 1728 | 131.5  | 367    | 2.720599 | 7.0825   | 1.380335 | Up | 8.62E-14 | 3.36E-13 |
| Dusp5        | 2436 | 809.5  | 2262   | 11.90079 | 30.97802 | 1.380188 | Up | 1.03E-12 | 3.24E-12 |
| C1d          | 3129 | 683    | 1895.5 | 7.766985 | 20.21443 | 1.379959 | Up | 6.82E-13 | 2.21E-12 |
| Smc4         | 4241 | 8386.5 | 23335  | 70.61108 | 183.6791 | 1.379221 | Up | 0        | 0        |
| Ap3m2        | 1584 | 263.5  | 736.5  | 5.957102 | 15.49604 | 1.379217 | Up | 1.80E-13 | 6.60E-13 |

|              |      |        |        |          |          |          |    |          |          |
|--------------|------|--------|--------|----------|----------|----------|----|----------|----------|
| Akip1        | 1783 | 403.5  | 1125.5 | 8.09033  | 21.04504 | 1.37921  | Up | 0        | 0        |
| LOC686151    | 636  | 89     | 248    | 4.992074 | 12.98338 | 1.378954 | Up | 0        | 0        |
| Armc7        | 2370 | 149    | 417    | 2.254986 | 5.862996 | 1.378519 | Up | 2.66E-13 | 9.48E-13 |
| lkzf5        | 2778 | 775    | 2162   | 9.990361 | 25.95957 | 1.377658 | Up | 0        | 0        |
| Ap4s1        | 892  | 200.5  | 557.5  | 8.023597 | 20.84809 | 1.377594 | Up | 0        | 0        |
| RGD1308907   | 3000 | 392    | 1093   | 4.67797  | 12.15403 | 1.37748  | Up | 0        | 0        |
| Plagl2       | 3502 | 405    | 1124.5 | 4.128606 | 10.72611 | 1.3774   | Up | 0        | 0        |
| Nox1         | 2577 | 26     | 72.5   | 0.360136 | 0.935271 | 1.376843 | Up | 2.48E-06 | 5.18E-06 |
| RGD1565690   | 2691 | 21     | 58.5   | 0.279458 | 0.725633 | 1.376609 | Up | 2.53E-05 | 4.96E-05 |
| Morn2        | 651  | 39     | 109.5  | 2.156909 | 5.599855 | 1.376424 | Up | 5.03E-09 | 1.18E-08 |
| Fanci        | 1653 | 479.5  | 1327.5 | 10.33919 | 26.81817 | 1.375088 | Up | 0        | 0        |
| LOC100912117 | 872  | 97.5   | 269.5  | 3.978962 | 10.31903 | 1.374843 | Up | 5.35E-14 | 2.12E-13 |
| Tcerg1       | 4366 | 5202   | 14440  | 42.58981 | 110.4275 | 1.374519 | Up | 3.14E-11 | 7.95E-11 |
| Zfp7         | 571  | 10     | 27.5   | 0.629689 | 1.630802 | 1.372869 | Up | 0.005099 | 0.008182 |
| Agpat9       | 2017 | 420    | 1161.5 | 7.4284   | 19.23467 | 1.372586 | Up | 1.49E-13 | 5.54E-13 |
| Eef1e1       | 998  | 1027.5 | 2845   | 36.79183 | 95.22724 | 1.371989 | Up | 0        | 0        |
| Epha1        | 3248 | 16     | 44.5   | 0.176272 | 0.456177 | 1.37179  | Up | 0.000264 | 0.000475 |
| Gatc         | 1967 | 954    | 2644.5 | 17.34825 | 44.88016 | 1.371287 | Up | 1.35E-12 | 4.16E-12 |
| RGD1307218   | 1795 | 17.5   | 48.5   | 0.349341 | 0.902847 | 1.369846 | Up | 0.000101 | 0.000189 |
| LOC688276    | 2684 | 9      | 25     | 0.119775 | 0.309303 | 1.368697 | Up | 0.005991 | 0.009572 |
| RGD1561507   | 559  | 20     | 55     | 1.278207 | 3.299419 | 1.36809  | Up | 4.37E-05 | 8.43E-05 |
| LOC100910152 | 799  | 161.5  | 448    | 7.250365 | 18.711   | 1.367761 | Up | 0        | 0        |
| Srgn         | 1320 | 27     | 74.5   | 0.730627 | 1.884672 | 1.367108 | Up | 2.15E-06 | 4.48E-06 |
| Ina          | 4593 | 29.5   | 80     | 0.227894 | 0.587796 | 1.366952 | Up | 7.29E-07 | 1.56E-06 |
| RGD1561694   | 1070 | 405    | 1113   | 13.48463 | 34.7689  | 1.366481 | Up | 0        | 0        |

|              |      |        |        |          |          |          |    |          |          |
|--------------|------|--------|--------|----------|----------|----------|----|----------|----------|
| Unc50        | 1197 | 626.5  | 1722.5 | 18.64841 | 48.06703 | 1.365995 | Up | 0        | 0        |
| LOC100909470 | 563  | 162.5  | 447    | 10.29204 | 26.51102 | 1.365063 | Up | 0        | 0        |
| Pggt1b       | 1568 | 509.5  | 1401   | 11.5821  | 29.82521 | 1.364635 | Up | 0        | 0        |
| LOC679578    | 960  | 1233.5 | 3407.5 | 46.04493 | 118.5128 | 1.363929 | Up | 4.71E-12 | 1.30E-11 |
| RGD1311345   | 2580 | 1236.5 | 3408   | 17.12793 | 44.08037 | 1.363786 | Up | 2.72E-12 | 7.94E-12 |
| Hells        | 3164 | 783    | 2150.5 | 8.828328 | 22.71375 | 1.363354 | Up | 0        | 0        |
| Rpl30        | 495  | 1230.5 | 3371.5 | 88.44407 | 227.4422 | 1.362663 | Up | 4.82E-12 | 1.33E-11 |
| Cxadr1       | 1381 | 161    | 437.5  | 4.125182 | 10.60723 | 1.362518 | Up | 0        | 0        |
| LOC691532    | 384  | 25     | 70.5   | 2.337104 | 6.008902 | 1.362379 | Up | 2.87E-06 | 5.96E-06 |
| Bola2        | 327  | 14.5   | 39.5   | 1.568305 | 4.031587 | 1.362142 | Up | 0.000536 | 0.000944 |
| Ddx20        | 2752 | 929    | 2554.5 | 12.05819 | 30.98047 | 1.361346 | Up | 1.35E-12 | 4.16E-12 |
| Perl1        | 2328 | 14     | 38.5   | 0.216669 | 0.55659  | 1.361122 | Up | 0.000802 | 0.001376 |
| Kbtbd2       | 3434 | 1783.5 | 4900.5 | 18.53455 | 47.6095  | 1.361032 | Up | 1.64E-14 | 6.74E-14 |
| LOC100364990 | 1673 | 421    | 1154   | 8.965553 | 23.0236  | 1.360649 | Up | 4.13E-13 | 1.41E-12 |
| Fytd1        | 3220 | 3508   | 9619   | 38.83288 | 99.71632 | 1.360551 | Up | 0        | 0        |
| Tia1         | 1435 | 321.5  | 884.5  | 7.999158 | 20.53713 | 1.360315 | Up | 0        | 0        |
| Polq         | 8527 | 557    | 1527   | 2.330368 | 5.979062 | 1.359361 | Up | 5.01E-13 | 1.68E-12 |
| Aox31        | 4360 | 27     | 74     | 0.220673 | 0.566038 | 1.358989 | Up | 2.15E-06 | 4.49E-06 |
| Ctf2p        | 615  | 10.5   | 28.5   | 0.606737 | 1.555243 | 1.357996 | Up | 0.003379 | 0.005508 |
| Fhl2         | 840  | 962.5  | 2647   | 41.05111 | 105.2253 | 1.357989 | Up | 0        | 0        |
| Wdyhv1       | 1442 | 146    | 399.5  | 3.615832 | 9.268088 | 1.357944 | Up | 3.33E-14 | 1.35E-13 |
| RGD1565766   | 747  | 110.5  | 300.5  | 5.240652 | 13.4301  | 1.357652 | Up | 0        | 0        |
| Eif3e        | 1502 | 3160   | 8641.5 | 74.9764  | 192.0904 | 1.357277 | Up | 0        | 0        |
| Cd47         | 1952 | 3107   | 8501.5 | 56.77054 | 145.4427 | 1.357236 | Up | 0        | 0        |
| Kif26b       | 7439 | 31     | 85.5   | 0.149888 | 0.383912 | 1.356894 | Up | 3.68E-07 | 8.00E-07 |

|              |      |        |        |          |          |          |    |          |          |
|--------------|------|--------|--------|----------|----------|----------|----|----------|----------|
| Zbtb34       | 1763 | 68     | 187    | 1.384085 | 3.544886 | 1.356807 | Up | 0        | 0        |
| LOC304131    | 1681 | 36     | 99     | 0.76701  | 1.96359  | 1.356177 | Up | 3.72E-08 | 8.45E-08 |
| Dbh          | 2250 | 14.5   | 40     | 0.230476 | 0.589943 | 1.355962 | Up | 0.000355 | 0.000635 |
| Dennd1b      | 2753 | 455    | 1245   | 5.893842 | 15.07576 | 1.354951 | Up | 3.90E-13 | 1.34E-12 |
| Usp15        | 3247 | 2303   | 6299.5 | 25.31746 | 64.74003 | 1.354525 | Up | 0        | 0        |
| Arrdc2       | 2318 | 204.5  | 562.5  | 3.166909 | 8.09777  | 1.354449 | Up | 1.72E-13 | 6.33E-13 |
| LOC679491    | 801  | 98     | 267    | 4.355065 | 11.12894 | 1.35355  | Up | 0        | 0        |
| Adam8        | 3081 | 37     | 102    | 0.431399 | 1.102387 | 1.353536 | Up | 2.18E-08 | 4.98E-08 |
| Fancb        | 2657 | 399.5  | 1088   | 5.356647 | 13.68222 | 1.3529   | Up | 0        | 0        |
| Sft2d1       | 995  | 758    | 2064.5 | 27.12225 | 69.26123 | 1.352571 | Up | 0        | 0        |
| Zfp426       | 3029 | 216    | 588.5  | 2.544153 | 6.494846 | 1.35211  | Up | 2.34E-13 | 8.42E-13 |
| Ube2t        | 989  | 558    | 1519.5 | 20.09983 | 51.3078  | 1.351995 | Up | 1.47E-13 | 5.48E-13 |
| Sfhl1        | 1766 | 51     | 139    | 1.032728 | 2.635485 | 1.351608 | Up | 8.77E-11 | 2.18E-10 |
| Duoxa2       | 963  | 10     | 27.5   | 0.371581 | 0.947339 | 1.350204 | Up | 0.005099 | 0.008182 |
| LOC100910503 | 631  | 84.5   | 230    | 4.777805 | 12.17808 | 1.349867 | Up | 0        | 0        |
| Nr6a1        | 1614 | 27     | 73.5   | 0.596117 | 1.518451 | 1.348933 | Up | 3.18E-06 | 6.58E-06 |
| Figf         | 1491 | 24.5   | 67     | 0.587411 | 1.496054 | 1.348721 | Up | 4.94E-06 | 1.01E-05 |
| Ube2v2       | 3260 | 2484   | 6759.5 | 27.18881 | 69.24065 | 1.348606 | Up | 0        | 0        |
| Tceb1        | 2156 | 1759.5 | 4762   | 28.95395 | 73.73126 | 1.348516 | Up | 1.96E-12 | 5.87E-12 |
| Map4k5       | 3306 | 2177   | 5933.5 | 23.5263  | 59.90808 | 1.348476 | Up | 0        | 0        |
| Pyroxd1      | 1781 | 249    | 679.5  | 5.0025   | 12.72509 | 1.346955 | Up | 1.13E-14 | 4.69E-14 |
| Ppih         | 753  | 669.5  | 1821.5 | 31.75241 | 80.74984 | 1.346593 | Up | 1.58E-12 | 4.81E-12 |
| Abcf3        | 2536 | 991.5  | 2702.5 | 13.99187 | 35.58041 | 1.346494 | Up | 2.91E-12 | 8.45E-12 |
| Nol8         | 4617 | 477    | 1297   | 3.686719 | 9.37195  | 1.346012 | Up | 0        | 0        |
| Lsr          | 2097 | 28     | 76.5   | 0.478339 | 1.215613 | 1.345578 | Up | 1.85E-06 | 3.88E-06 |

|              |      |         |        |          |          |          |    |          |          |
|--------------|------|---------|--------|----------|----------|----------|----|----------|----------|
| Ccar1        | 4438 | 2809.5  | 7638   | 22.62376 | 57.47989 | 1.345219 | Up | 0        | 0        |
| LOC100911652 | 1412 | 148     | 399    | 3.720598 | 9.447761 | 1.344438 | Up | 0        | 0        |
| Slc11a1      | 2012 | 37.5    | 102    | 0.664226 | 1.685862 | 1.343739 | Up | 2.18E-08 | 4.98E-08 |
| Tmem42       | 1306 | 59      | 161    | 1.619621 | 4.10963  | 1.343352 | Up | 2.76E-12 | 8.05E-12 |
| Terf2ip      | 2165 | 367     | 995.5  | 6.06553  | 15.38731 | 1.343035 | Up | 4.71E-13 | 1.59E-12 |
| Sstr3        | 3985 | 28.5    | 76.5   | 0.252534 | 0.640587 | 1.342292 | Up | 1.85E-06 | 3.88E-06 |
| Akr1c12l1    | 1292 | 11      | 29.5   | 0.302437 | 0.766843 | 1.342297 | Up | 0.004325 | 0.006968 |
| Fgfr1op2     | 2860 | 1805.5  | 4904.5 | 22.58883 | 57.27401 | 1.342271 | Up | 3.55E-12 | 1.01E-11 |
| Pmp2         | 1350 | 20      | 54.5   | 0.530972 | 1.345505 | 1.341441 | Up | 6.50E-05 | 0.000123 |
| RGD1307830   | 3638 | 734     | 1986   | 7.198475 | 18.23367 | 1.340842 | Up | 9.66E-13 | 3.06E-12 |
| RGD1563669   | 1948 | 272     | 737.5  | 4.990245 | 12.63933 | 1.340738 | Up | 7.17E-13 | 2.31E-12 |
| Phlda1       | 1811 | 21199.5 | 57642  | 419.8473 | 1062.665 | 1.33975  | Up | 0        | 0        |
| Sbds         | 1465 | 1771.5  | 4794   | 43.19271 | 109.205  | 1.338179 | Up | 4.16E-12 | 1.17E-11 |
| MGC105560    | 2838 | 1207.5  | 3261   | 15.1765  | 38.36148 | 1.337819 | Up | 7.00E-12 | 1.87E-11 |
| Klf3         | 4988 | 1258.5  | 3408   | 9.040781 | 22.82581 | 1.336147 | Up | 2.27E-12 | 6.73E-12 |
| Hist1h1d     | 660  | 107.5   | 293.5  | 5.852223 | 14.76997 | 1.33561  | Up | 0        | 0        |
| LOC100359563 | 395  | 156.5   | 421    | 14.06199 | 35.48189 | 1.335282 | Up | 1.64E-13 | 6.07E-13 |
| Fhl3         | 1067 | 1250.5  | 3390.5 | 42.03039 | 106.0195 | 1.334825 | Up | 4.14E-12 | 1.16E-11 |
| Mybpc2       | 3658 | 14      | 38     | 0.137891 | 0.347813 | 1.334781 | Up | 0.000802 | 0.001377 |
| LOC100909515 | 468  | 20.5    | 55.5   | 1.563139 | 3.941064 | 1.334139 | Up | 4.37E-05 | 8.43E-05 |
| Ints12       | 1566 | 571     | 1545.5 | 13.06131 | 32.92705 | 1.333973 | Up | 0        | 0        |
| Wdr25l       | 1895 | 91      | 246.5  | 1.719864 | 4.335567 | 1.333926 | Up | 0        | 0        |
| Ppig         | 3964 | 3381    | 9125   | 30.48864 | 76.83788 | 1.333546 | Up | 0        | 0        |
| Prkcb        | 2666 | 19.5    | 53     | 0.261623 | 0.65934  | 1.333535 | Up | 5.06E-05 | 9.67E-05 |
| Snx16        | 2166 | 290     | 779    | 4.771331 | 12.02374 | 1.333422 | Up | 2.80E-13 | 9.94E-13 |



|              |      |        |        |          |          |          |    |          |          |
|--------------|------|--------|--------|----------|----------|----------|----|----------|----------|
| Pdss2        | 2100 | 261    | 705    | 4.44243  | 11.19343 | 1.333231 | Up | 2.23E-13 | 8.05E-13 |
| E2f5         | 1713 | 489    | 1315.5 | 10.19575 | 25.67858 | 1.332598 | Up | 5.92E-13 | 1.95E-12 |
| Foxn1        | 2415 | 168    | 456    | 2.50494  | 6.307821 | 1.332366 | Up | 1.69E-13 | 6.24E-13 |
| Cdc14a       | 4476 | 424    | 1143.5 | 3.390423 | 8.530958 | 1.331243 | Up | 0        | 0        |
| LOC690437    | 1569 | 31.5   | 84.5   | 0.714929 | 1.798366 | 1.330814 | Up | 5.44E-07 | 1.17E-06 |
| Mcl1         | 2130 | 3475.5 | 9371.5 | 58.31621 | 146.6615 | 1.330522 | Up | 0        | 0        |
| LOC100910237 | 546  | 27     | 73     | 1.76635  | 4.440727 | 1.330025 | Up | 3.18E-06 | 6.58E-06 |
| Btbd16       | 1916 | 12     | 32     | 0.221119 | 0.55573  | 1.329559 | Up | 0.002459 | 0.004051 |
| Gjb4         | 2659 | 43     | 115    | 0.574571 | 1.442942 | 1.328457 | Up | 6.16E-09 | 1.44E-08 |
| Tmprss2      | 3180 | 20     | 53.5   | 0.223609 | 0.561555 | 1.328448 | Up | 9.61E-05 | 0.000179 |
| Ubxn2b       | 1494 | 229.5  | 615    | 5.48857  | 13.78092 | 1.32817  | Up | 2.54E-13 | 9.11E-13 |
| Rnf151       | 1170 | 42     | 113    | 1.283546 | 3.220692 | 1.327236 | Up | 7.14E-09 | 1.67E-08 |
| LOC100911506 | 610  | 44     | 119    | 2.592366 | 6.499886 | 1.326145 | Up | 2.46E-09 | 5.84E-09 |
| Dd25         | 3934 | 1296.5 | 3470.5 | 11.748   | 29.45493 | 1.326094 | Up | 4.61E-12 | 1.28E-11 |
| Arhgap9      | 2480 | 20     | 53.5   | 0.286262 | 0.717518 | 1.325677 | Up | 9.61E-05 | 0.000179 |
| Nsun6        | 2063 | 354    | 948.5  | 6.128263 | 15.35693 | 1.325339 | Up | 0        | 0        |
| Grpel2       | 2028 | 484.5  | 1296   | 8.52265  | 21.34882 | 1.324782 | Up | 1.83E-12 | 5.50E-12 |
| LOC100360499 | 207  | 45.5   | 121.5  | 7.800296 | 19.53791 | 1.324675 | Up | 2.13E-09 | 5.05E-09 |
| LOC690155    | 1302 | 382    | 1022   | 10.46338 | 26.19994 | 1.324215 | Up | 5.33E-13 | 1.78E-12 |
| Timmdc1      | 1360 | 278    | 745.5  | 7.311562 | 18.30766 | 1.324196 | Up | 1.88E-13 | 6.87E-13 |
| Zmat3        | 7513 | 1992.5 | 5335   | 9.468096 | 23.70446 | 1.324013 | Up | 2.46E-13 | 8.83E-13 |
| Nufip1       | 1671 | 656.5  | 1760   | 14.05452 | 35.17797 | 1.323638 | Up | 1.14E-12 | 3.55E-12 |
| LOC100912875 | 695  | 22     | 58.5   | 1.131056 | 2.83033  | 1.323299 | Up | 4.77E-05 | 9.12E-05 |
| Snpc5        | 1213 | 70.5   | 190    | 2.082335 | 5.2103   | 1.323164 | Up | 0        | 0        |
| Trim30       | 1402 | 37     | 99     | 0.942306 | 2.356915 | 1.322633 | Up | 6.99E-08 | 1.57E-07 |

|              |      |        |        |          |          |          |    |          |          |
|--------------|------|--------|--------|----------|----------|----------|----|----------|----------|
| RGD1566099   | 727  | 209.5  | 561    | 10.31128 | 25.78941 | 1.322555 | Up | 1.08E-13 | 4.16E-13 |
| LOC100911660 | 3220 | 817    | 2183.5 | 9.049244 | 22.63238 | 1.322519 | Up | 1.28E-12 | 3.95E-12 |
| LOC100911072 | 1438 | 373    | 996    | 9.245056 | 23.11027 | 1.32178  | Up | 3.81E-13 | 1.31E-12 |
| Vwa5b2       | 4509 | 78     | 208.5  | 0.617097 | 1.542537 | 1.321736 | Up | 0        | 0        |
| Plk1s1       | 2584 | 415    | 1114   | 5.756019 | 14.38483 | 1.321405 | Up | 0        | 0        |
| Klf4         | 2393 | 6474.5 | 17368  | 96.94846 | 242.2784 | 1.321376 | Up | 1.54E-11 | 4.00E-11 |
| Ass1         | 1495 | 396.5  | 1060   | 9.48976  | 23.70416 | 1.320697 | Up | 0        | 0        |
| LOC100912736 | 1469 | 25     | 67     | 0.608582 | 1.519684 | 1.320247 | Up | 9.38E-06 | 1.88E-05 |
| Mlh3         | 5424 | 227.5  | 607.5  | 1.496371 | 3.73417  | 1.31932  | Up | 3.55E-15 | 1.49E-14 |
| Alcam        | 2866 | 1699.5 | 4534.5 | 21.17526 | 52.78766 | 1.317821 | Up | 8.08E-12 | 2.14E-11 |
| Cenpn        | 1865 | 1032.5 | 2753   | 19.76647 | 49.25849 | 1.317317 | Up | 1.69E-12 | 5.13E-12 |
| RGD1563690   | 778  | 9.5    | 25.5   | 0.432888 | 1.07868  | 1.317202 | Up | 0.005991 | 0.009571 |
| Ndrp3        | 2580 | 795.5  | 2125.5 | 11.02794 | 27.47756 | 1.317091 | Up | 0        | 0        |
| Esf1         | 3404 | 1693.5 | 4505.5 | 17.75552 | 44.21623 | 1.316309 | Up | 5.62E-12 | 1.52E-11 |
| LOC100912730 | 4580 | 124.5  | 331    | 0.966638 | 2.405619 | 1.315361 | Up | 1.27E-13 | 4.83E-13 |
| Cep290       | 8251 | 737.5  | 1964   | 3.190389 | 7.939704 | 1.315353 | Up | 0        | 0        |
| LOC100360772 | 4131 | 438    | 1160.5 | 3.774854 | 9.393887 | 1.315301 | Up | 7.26E-13 | 2.34E-12 |
| LOC100912885 | 568  | 10.5   | 27.5   | 0.656943 | 1.633077 | 1.313753 | Up | 0.005099 | 0.008183 |
| Hmgb2        | 1225 | 2141   | 5671   | 62.21218 | 154.6479 | 1.313718 | Up | 0        | 0        |
| Ttc33        | 1790 | 241.5  | 640.5  | 4.810599 | 11.95682 | 1.313545 | Up | 2.12E-13 | 7.71E-13 |
| RGD1565166   | 1529 | 23     | 61.5   | 0.537145 | 1.33495  | 1.313403 | Up | 2.77E-05 | 5.40E-05 |
| LOC100911535 | 868  | 405.5  | 1081.5 | 16.72761 | 41.56934 | 1.313289 | Up | 0        | 0        |
| Ei24         | 2115 | 2227.5 | 5925.5 | 37.62247 | 93.46577 | 1.312843 | Up | 0        | 0        |
| RGD1560263   | 864  | 34     | 91     | 1.410791 | 3.503935 | 1.312471 | Up | 2.36E-07 | 5.19E-07 |
| Lims2        | 2114 | 21.5   | 57.5   | 0.363519 | 0.902787 | 1.312354 | Up | 3.76E-05 | 7.28E-05 |

|              |      |        |        |          |          |          |    |          |          |
|--------------|------|--------|--------|----------|----------|----------|----|----------|----------|
| Mrpl50       | 1795 | 373    | 987.5  | 7.399317 | 18.37567 | 1.312333 | Up | 3.81E-13 | 1.31E-12 |
| Lrrc48       | 1856 | 45     | 120.5  | 0.869752 | 2.159623 | 1.312104 | Up | 3.12E-09 | 7.38E-09 |
| Pbxip1       | 3000 | 24.5   | 65.5   | 0.293663 | 0.729095 | 1.311944 | Up | 1.09E-05 | 2.18E-05 |
| LOC683961    | 525  | 1331.5 | 3502.5 | 89.78481 | 222.8689 | 1.311652 | Up | 5.14E-12 | 1.41E-11 |
| Rnf43        | 2349 | 74.5   | 198    | 1.134765 | 2.815363 | 1.310927 | Up | 3.11E-14 | 1.27E-13 |
| Cox16        | 770  | 485    | 1279   | 22.36378 | 55.48251 | 1.310869 | Up | 6.91E-13 | 2.24E-12 |
| LOC367975    | 1490 | 18     | 47     | 0.426508 | 1.057369 | 1.309835 | Up | 0.000287 | 0.000515 |
| Nr1d2        | 1996 | 617.5  | 1640.5 | 11.04508 | 27.38112 | 1.309778 | Up | 8.96E-13 | 2.86E-12 |
| LOC307738    | 936  | 22     | 58     | 0.833095 | 2.064033 | 1.308914 | Up | 4.77E-05 | 9.12E-05 |
| LOC682408    | 1623 | 172.5  | 458.5  | 3.798086 | 9.409367 | 1.308825 | Up | 1.17E-13 | 4.46E-13 |
| LOC683456    | 536  | 91     | 238.5  | 5.99918  | 14.8584  | 1.308442 | Up | 0        | 0        |
| Tpk1         | 3331 | 119    | 314    | 1.27302  | 3.152104 | 1.308061 | Up | 0        | 0        |
| Lrrtm3       | 3837 | 22     | 58.5   | 0.205467 | 0.508673 | 1.30783  | Up | 4.77E-05 | 9.12E-05 |
| Lrrm4cl      | 2372 | 23     | 60.5   | 0.346245 | 0.857063 | 1.307606 | Up | 4.08E-05 | 7.87E-05 |
| RGD1561852   | 1130 | 50     | 132    | 1.578254 | 3.904035 | 1.306636 | Up | 6.90E-10 | 1.67E-09 |
| Col24a1      | 357  | 10.5   | 27.5   | 1.051645 | 2.600806 | 1.306311 | Up | 0.005099 | 0.008184 |
| LOC100363455 | 1590 | 28     | 74     | 0.631588 | 1.561776 | 1.306133 | Up | 4.03E-06 | 8.28E-06 |
| LOC100912253 | 4447 | 455    | 1201.5 | 3.651274 | 9.027301 | 1.305895 | Up | 3.90E-13 | 1.33E-12 |
| Stat6        | 2635 | 62     | 164.5  | 0.842394 | 2.081397 | 1.304985 | Up | 5.41E-12 | 1.48E-11 |
| Dtwd1        | 1587 | 164    | 433    | 3.683373 | 9.099111 | 1.304698 | Up | 1.50E-13 | 5.56E-13 |
| Tox          | 3093 | 148    | 393    | 1.712413 | 4.228489 | 1.304112 | Up | 0        | 0        |
| LOC100359664 | 1335 | 251.5  | 663.5  | 6.713051 | 16.57618 | 1.304071 | Up | 1.37E-13 | 5.15E-13 |
| Zfand6       | 1571 | 1300.5 | 3422.5 | 29.44876 | 72.70128 | 1.303774 | Up | 5.74E-12 | 1.55E-11 |
| Banp         | 2090 | 311    | 823.5  | 5.324956 | 13.14578 | 1.303759 | Up | 0        | 0        |
| Cpeb3        | 5411 | 123.5  | 326.5  | 0.816023 | 2.014146 | 1.303486 | Up | 0        | 0        |

|              |      |        |         |          |          |          |    |          |          |
|--------------|------|--------|---------|----------|----------|----------|----|----------|----------|
| Lca5         | 3152 | 260    | 690     | 2.958576 | 7.298382 | 1.302674 | Up | 4.56E-13 | 1.54E-12 |
| LOC100910252 | 522  | 18     | 47      | 1.225116 | 3.02161  | 1.302399 | Up | 0.000287 | 0.000515 |
| LOC100912393 | 1533 | 31.5   | 82.5    | 0.72723  | 1.79293  | 1.301836 | Up | 1.18E-06 | 2.50E-06 |
| Mterfd3      | 1643 | 26     | 68      | 0.562769 | 1.387282 | 1.301645 | Up | 1.18E-05 | 2.36E-05 |
| Fip111       | 1925 | 4402   | 11634   | 81.91024 | 201.8713 | 1.30132  | Up | 1.98E-11 | 5.10E-11 |
| Taf7         | 1796 | 441.5  | 1164.5  | 8.766846 | 21.60217 | 1.301046 | Up | 3.59E-13 | 1.25E-12 |
| LOC100361436 | 1316 | 180.5  | 475.5   | 4.893361 | 12.0569  | 1.300961 | Up | 3.16E-13 | 1.11E-12 |
| RGD1562407   | 2385 | 4071   | 10756   | 61.16489 | 150.6153 | 1.300093 | Up | 2.64E-11 | 6.73E-11 |
| Rasa2        | 2556 | 297    | 780.5   | 4.138841 | 10.18813 | 1.29959  | Up | 3.95E-13 | 1.35E-12 |
| Arhgef5      | 5585 | 12     | 32      | 0.07709  | 0.189683 | 1.298979 | Up | 0.002459 | 0.004051 |
| Rnf113a1     | 1149 | 168    | 443     | 5.235507 | 12.87707 | 1.298404 | Up | 1.69E-13 | 6.23E-13 |
| LOC100911069 | 1932 | 428    | 1123    | 7.89033  | 19.40558 | 1.298314 | Up | 2.52E-13 | 9.04E-13 |
| Tti2         | 1946 | 296    | 780     | 5.439635 | 13.3757  | 1.298033 | Up | 3.73E-13 | 1.29E-12 |
| Rbm18        | 2472 | 1620   | 4255    | 23.38731 | 57.45125 | 1.296612 | Up | 3.30E-12 | 9.47E-12 |
| Coq5         | 1606 | 597.5  | 1572    | 13.30877 | 32.68392 | 1.296203 | Up | 2.85E-13 | 1.01E-12 |
| Sned1        | 5597 | 18.5   | 49      | 0.118839 | 0.291809 | 1.296011 | Up | 0.000131 | 0.00024  |
| Fam111a      | 3191 | 24633  | 64730.5 | 275.7555 | 677.0188 | 1.295806 | Up | 6.25E-11 | 1.56E-10 |
| Tlk2         | 3689 | 1427   | 3750.5  | 13.82415 | 33.94012 | 1.2958   | Up | 0        | 0        |
| Rbbp6        | 6191 | 2587   | 6806    | 14.94671 | 36.69611 | 1.295799 | Up | 0        | 0        |
| RGD1565048   | 573  | 15.5   | 40.5    | 0.958451 | 2.352733 | 1.295561 | Up | 0.000686 | 0.001181 |
| Kat3         | 1660 | 26     | 68.5    | 0.56046  | 1.374185 | 1.293892 | Up | 1.18E-05 | 2.36E-05 |
| Gtf2h3       | 1878 | 505    | 1328.5  | 9.635352 | 23.60662 | 1.292782 | Up | 0        | 0        |
| Ints2        | 1961 | 1294.5 | 3385.5  | 23.54631 | 57.68241 | 1.292631 | Up | 2.60E-12 | 7.60E-12 |
| LOC679663    | 339  | 91.5   | 238.5   | 9.579649 | 23.46107 | 1.292224 | Up | 0        | 0        |
| RGD1305254   | 7036 | 36     | 94.5    | 0.183575 | 0.449247 | 1.291137 | Up | 2.56E-07 | 5.61E-07 |

|              |      |        |        |          |          |          |    |          |          |
|--------------|------|--------|--------|----------|----------|----------|----|----------|----------|
| Plcd4        | 2696 | 187.5  | 491    | 2.490229 | 6.089475 | 1.29004  | Up | 3.37E-13 | 1.18E-12 |
| Yes1         | 1795 | 829    | 2167   | 16.47783 | 40.26436 | 1.288977 | Up | 0        | 0        |
| LOC497940    | 1480 | 203.5  | 532.5  | 4.920388 | 12.02313 | 1.288968 | Up | 1.92E-13 | 7.01E-13 |
| Fam175a      | 1513 | 327.5  | 855.5  | 7.732848 | 18.89079 | 1.288611 | Up | 6.83E-13 | 2.22E-12 |
| Usp21        | 2266 | 927.5  | 2432   | 14.67445 | 35.84811 | 1.28859  | Up | 2.08E-12 | 6.19E-12 |
| Trpm8        | 4184 | 33     | 86.5   | 0.282366 | 0.689486 | 1.287954 | Up | 8.68E-07 | 1.85E-06 |
| LOC100911474 | 2555 | 26.5   | 69.5   | 0.371923 | 0.907997 | 1.287685 | Up | 8.05E-06 | 1.63E-05 |
| LOC100910753 | 2523 | 2257   | 5897.5 | 31.96606 | 78.01386 | 1.28719  | Up | 0        | 0        |
| Nfatc2ip     | 1498 | 186.5  | 488.5  | 4.460539 | 10.88478 | 1.287023 | Up | 6.10E-13 | 2.00E-12 |
| LOC679462    | 1646 | 66     | 173    | 1.437595 | 3.507423 | 1.286754 | Up | 1.86E-12 | 5.58E-12 |
| Whamm        | 2849 | 351.5  | 920    | 4.415116 | 10.7677  | 1.286186 | Up | 9.48E-14 | 3.68E-13 |
| Rest         | 3251 | 1379   | 3596   | 15.15338 | 36.95173 | 1.286002 | Up | 6.06E-12 | 1.63E-11 |
| LOC100911511 | 1786 | 61.5   | 160.5  | 1.23298  | 3.006626 | 1.285996 | Up | 1.38E-11 | 3.59E-11 |
| Cpsf7        | 3158 | 2099   | 5483.5 | 23.76865 | 57.95565 | 1.285889 | Up | 0        | 0        |
| Nudcd2       | 1569 | 1938.5 | 5046.5 | 44.01119 | 107.3121 | 1.28587  | Up | 5.60E-12 | 1.52E-11 |
| Bicd1        | 4139 | 945    | 2463   | 8.153399 | 19.87036 | 1.285145 | Up | 2.03E-12 | 6.06E-12 |
| Vegfa        | 2544 | 2899.5 | 7570   | 40.76208 | 99.33898 | 1.285132 | Up | 0        | 0        |
| Gad1         | 3216 | 80     | 209.5  | 0.891913 | 2.172819 | 1.284593 | Up | 0        | 0        |
| Rnf135       | 2299 | 451.5  | 1171   | 6.997154 | 17.04126 | 1.284192 | Up | 2.05E-12 | 6.11E-12 |
| N4bp2l2      | 2014 | 1254   | 3262   | 22.22119 | 54.1129  | 1.284037 | Up | 5.62E-12 | 1.52E-11 |
| Map2k4       | 1194 | 551    | 1433.5 | 16.44868 | 40.04417 | 1.283621 | Up | 7.88E-14 | 3.09E-13 |
| Muc15        | 1513 | 28     | 72     | 0.653118 | 1.589392 | 1.283059 | Up | 8.64E-06 | 1.74E-05 |
| Usp8         | 4065 | 1412.5 | 3683   | 12.43538 | 30.23718 | 1.281872 | Up | 4.26E-12 | 1.19E-11 |
| LOC100362724 | 714  | 151    | 393    | 7.557965 | 18.35661 | 1.28023  | Up | 0        | 0        |
| LOC100360936 | 1234 | 427.5  | 1108   | 12.35449 | 30.00404 | 1.280122 | Up | 1.02E-12 | 3.21E-12 |

|              |      |        |        |          |          |          |    |          |          |
|--------------|------|--------|--------|----------|----------|----------|----|----------|----------|
| Mrps14       | 1286 | 850.5  | 2198.5 | 23.48855 | 57.01287 | 1.27933  | Up | 2.20E-12 | 6.54E-12 |
| Rbm34        | 2900 | 1016.5 | 2637   | 12.50398 | 30.3447  | 1.279057 | Up | 3.94E-13 | 1.35E-12 |
| Acot8        | 1503 | 231    | 601.5  | 5.501526 | 13.34851 | 1.278775 | Up | 0        | 0        |
| Slc31a2      | 1763 | 189.5  | 491    | 3.837296 | 9.30597  | 1.278066 | Up | 2.87E-13 | 1.02E-12 |
| Zc3hc1       | 1846 | 941.5  | 2444.5 | 18.21807 | 44.16571 | 1.277556 | Up | 0        | 0        |
| C2           | 2629 | 23     | 60     | 0.312398 | 0.757173 | 1.277239 | Up | 4.08E-05 | 7.87E-05 |
| LOC690675    | 388  | 16.5   | 42.5   | 1.503236 | 3.641983 | 1.276653 | Up | 0.000584 | 0.001013 |
| Chmp1b       | 2531 | 1091   | 2822.5 | 15.3756  | 37.23257 | 1.275922 | Up | 4.14E-12 | 1.16E-11 |
| Zfp174       | 1221 | 34.5   | 89     | 1.008021 | 2.440235 | 1.275494 | Up | 5.09E-07 | 1.10E-06 |
| Gdpc2        | 2500 | 31     | 79.5   | 0.44073  | 1.066921 | 1.275485 | Up | 3.68E-06 | 7.59E-06 |
| RGD1564300   | 1138 | 122.5  | 317    | 3.841052 | 9.294657 | 1.2749   | Up | 4.93E-14 | 1.96E-13 |
| Sec22a       | 1661 | 286    | 740.5  | 6.144435 | 14.86025 | 1.274107 | Up | 3.49E-14 | 1.41E-13 |
| LOC100912338 | 681  | 32     | 83     | 1.684812 | 4.074457 | 1.27402  | Up | 1.48E-06 | 3.13E-06 |
| Naa30        | 4511 | 921.5  | 2386   | 7.287687 | 17.62076 | 1.273743 | Up | 0        | 0        |
| LOC100362172 | 660  | 18     | 47     | 0.978513 | 2.365272 | 1.273344 | Up | 0.000287 | 0.000515 |
| Bmp3         | 2158 | 16     | 41.5   | 0.265041 | 0.640594 | 1.273196 | Up | 0.000862 | 0.001472 |
| Ii10rb       | 1805 | 278    | 721    | 5.511213 | 13.31878 | 1.27302  | Up | 1.88E-13 | 6.87E-13 |
| Dem1         | 2016 | 188.5  | 488    | 3.344523 | 8.080389 | 1.272624 | Up | 1.80E-13 | 6.62E-13 |
| Pank2        | 1854 | 583    | 1507   | 11.22593 | 27.11377 | 1.27219  | Up | 5.08E-13 | 1.70E-12 |
| Bdkrb2       | 4111 | 263    | 682    | 2.292151 | 5.533935 | 1.271604 | Up | 1.80E-13 | 6.61E-13 |
| Has3         | 2465 | 23     | 59.5   | 0.333647 | 0.805341 | 1.271275 | Up | 5.97E-05 | 0.000114 |
| Rbm5         | 3018 | 2462   | 6360   | 29.14232 | 70.3397  | 1.271224 | Up | 0        | 0        |
| RGD1306072   | 1954 | 174    | 450.5  | 3.191125 | 7.700875 | 1.270957 | Up | 1.43E-13 | 5.33E-13 |
| Gdf6         | 1576 | 15.5   | 40     | 0.351383 | 0.847952 | 1.270937 | Up | 0.000686 | 0.001181 |
| Dpcd         | 1531 | 425.5  | 1097   | 9.914081 | 23.91896 | 1.270604 | Up | 1.53E-12 | 4.67E-12 |

|              |      |        |         |          |          |          |    |          |          |
|--------------|------|--------|---------|----------|----------|----------|----|----------|----------|
| LOC685515    | 542  | 13     | 33.5    | 0.850863 | 2.052782 | 1.270581 | Up | 0.003088 | 0.005043 |
| Dynll1       | 801  | 9263.5 | 23988   | 414.1498 | 999.1694 | 1.270577 | Up | 1.56E-11 | 4.04E-11 |
| Cpm          | 5450 | 768.5  | 1989    | 5.046974 | 12.17062 | 1.269912 | Up | 0        | 0        |
| Fubp1        | 2380 | 4543   | 11765.5 | 68.41134 | 164.9518 | 1.269737 | Up | 1.79E-11 | 4.62E-11 |
| Dpm1         | 2297 | 819    | 2113.5  | 12.72638 | 30.67909 | 1.269434 | Up | 4.71E-14 | 1.88E-13 |
| Fxr1         | 2170 | 1949.5 | 5022    | 32.04057 | 77.22805 | 1.269225 | Up | 3.04E-12 | 8.80E-12 |
| LOC100911177 | 487  | 1928   | 4965    | 141.2654 | 340.4863 | 1.269189 | Up | 4.36E-12 | 1.21E-11 |
| Prrt3        | 3737 | 17     | 44      | 0.161707 | 0.38973  | 1.269087 | Up | 0.000497 | 0.000879 |
| LOC100360704 | 825  | 25.5   | 65.5    | 1.101509 | 2.654529 | 1.268974 | Up | 2.03E-05 | 3.99E-05 |
| Mto1         | 2405 | 438    | 1127    | 6.491589 | 15.63931 | 1.268533 | Up | 7.26E-13 | 2.34E-12 |
| Dph5         | 1572 | 420    | 1086    | 9.572079 | 23.05864 | 1.268403 | Up | 1.49E-13 | 5.54E-13 |
| Mmachc       | 1703 | 212    | 549.5   | 4.457886 | 10.73764 | 1.268245 | Up | 0        | 0        |
| Pus10        | 1852 | 225.5  | 581     | 4.34908  | 10.47005 | 1.267486 | Up | 0        | 0        |
| Usp53        | 6111 | 1170.5 | 3012.5  | 6.83876  | 16.46253 | 1.267379 | Up | 2.96E-12 | 8.57E-12 |
| Dusp14l1     | 1305 | 140    | 362.5   | 3.84936  | 9.265493 | 1.267249 | Up | 1.60E-14 | 6.57E-14 |
| LOC100365212 | 1456 | 45     | 116     | 1.103969 | 2.656848 | 1.267016 | Up | 1.42E-08 | 3.27E-08 |
| Il28ra       | 1593 | 56     | 145     | 1.266196 | 3.04519  | 1.266032 | Up | 1.91E-10 | 4.70E-10 |
| Tspan31      | 1480 | 2068.5 | 5317    | 49.88889 | 119.9194 | 1.265275 | Up | 0        | 0        |
| Zbtb11       | 4883 | 685    | 1764    | 5.008844 | 12.03806 | 1.265053 | Up | 6.06E-13 | 1.99E-12 |
| Trappc2      | 1474 | 343    | 880.5   | 8.290194 | 19.91963 | 1.264713 | Up | 0        | 0        |
| Slnf3        | 4860 | 1877   | 4815    | 13.75639 | 33.05341 | 1.264698 | Up | 6.02E-12 | 1.62E-11 |
| Tnk1         | 2055 | 15     | 39      | 0.26175  | 0.628801 | 1.264415 | Up | 0.001016 | 0.001721 |
| Ogt          | 5308 | 2668   | 6850    | 17.93695 | 43.08296 | 1.264183 | Up | 0        | 0        |
| LOC100911919 | 931  | 30     | 77      | 1.153058 | 2.769049 | 1.263926 | Up | 4.31E-06 | 8.85E-06 |
| Ints6        | 4391 | 698.5  | 1795.5  | 5.688771 | 13.65827 | 1.263586 | Up | 0        | 0        |

|              |      |        |         |          |          |          |    |          |          |
|--------------|------|--------|---------|----------|----------|----------|----|----------|----------|
| Tnfrsf12a    | 993  | 6172.5 | 15914.5 | 222.7862 | 534.7777 | 1.26328  | Up | 5.65E-12 | 1.53E-11 |
| LOC100912909 | 672  | 19     | 49.5    | 1.014288 | 2.434519 | 1.263169 | Up | 0.000244 | 0.00044  |
| Grpel1       | 960  | 954.5  | 2440    | 35.36229 | 84.84971 | 1.262698 | Up | 1.35E-12 | 4.16E-12 |
| Tmem199      | 1311 | 941.5  | 2415.5  | 25.63205 | 61.49382 | 1.262493 | Up | 0        | 0        |
| LOC100911285 | 781  | 26     | 66.5    | 1.185373 | 2.843371 | 1.262261 | Up | 2.53E-05 | 4.95E-05 |
| Med31        | 627  | 273.5  | 700     | 15.55346 | 37.30123 | 1.261987 | Up | 2.09E-13 | 7.60E-13 |
| Tubb3        | 1796 | 64     | 165.5   | 1.276403 | 3.057776 | 1.260398 | Up | 1.26E-11 | 3.28E-11 |
| Pik3cb       | 3213 | 420    | 1075.5  | 4.67487  | 11.19909 | 1.260383 | Up | 1.49E-13 | 5.54E-13 |
| Col14a1      | 6437 | 19     | 49      | 0.105888 | 0.253449 | 1.259157 | Up | 0.000244 | 0.00044  |
| LOC100912470 | 1437 | 208    | 530     | 5.151546 | 12.32701 | 1.258745 | Up | 3.49E-13 | 1.21E-12 |
| Tmem140      | 1396 | 58.5   | 149     | 1.494788 | 3.575097 | 1.258041 | Up | 1.41E-10 | 3.47E-10 |
| Zfp622       | 1670 | 657    | 1684.5  | 14.08893 | 33.69583 | 1.258008 | Up | 0        | 0        |
| Miir1        | 1659 | 12     | 31      | 0.25883  | 0.618982 | 1.257893 | Up | 0.003658 | 0.005954 |
| RGD1565247   | 4725 | 240    | 615     | 1.817561 | 4.345966 | 1.257673 | Up | 0        | 0        |
| LOC287274    | 858  | 157.5  | 401     | 6.518141 | 15.58498 | 1.257624 | Up | 0        | 0        |
| LOC100911519 | 3192 | 299    | 766.5   | 3.355109 | 8.020752 | 1.257378 | Up | 6.08E-13 | 2.00E-12 |
| Rap2b        | 552  | 351.5  | 901.5   | 22.81964 | 54.54613 | 1.2572   | Up | 9.48E-14 | 3.68E-13 |
| Stk19        | 1161 | 213.5  | 547     | 6.566216 | 15.68974 | 1.256687 | Up | 2.80E-13 | 9.94E-13 |
| Trafd1       | 2466 | 1255   | 3207.5  | 18.18318 | 43.40671 | 1.255314 | Up | 5.54E-12 | 1.51E-11 |
| LOC100360616 | 2714 | 112.5  | 286.5   | 1.474931 | 3.520623 | 1.255183 | Up | 0        | 0        |
| Trpc1        | 4015 | 232.5  | 592     | 2.062489 | 4.919874 | 1.254235 | Up | 3.80E-13 | 1.31E-12 |
| Oxnad1       | 2647 | 764.5  | 1958.5  | 10.35313 | 24.69608 | 1.254215 | Up | 9.61E-14 | 3.72E-13 |
| Ndufaf2      | 602  | 181.5  | 460     | 10.70893 | 25.53394 | 1.253602 | Up | 1.41E-13 | 5.30E-13 |
| Cdkn1b       | 1755 | 1620   | 4133.5  | 32.95455 | 78.54241 | 1.252994 | Up | 3.30E-12 | 9.47E-12 |
| Cdc73        | 2101 | 868    | 2208.5  | 14.73424 | 35.10729 | 1.252599 | Up | 0        | 0        |



|           |      |        |        |          |          |          |    |          |          |
|-----------|------|--------|--------|----------|----------|----------|----|----------|----------|
| Trmt11    | 1568 | 242    | 615    | 5.508039 | 13.12021 | 1.25218  | Up | 3.84E-13 | 1.32E-12 |
| Rfx7      | 7998 | 1605.5 | 4100   | 7.176913 | 17.0942  | 1.252072 | Up | 2.78E-12 | 8.11E-12 |
| Terf1     | 2056 | 903    | 2300   | 15.67424 | 37.32761 | 1.251847 | Up | 0        | 0        |
| Uqcrb     | 1054 | 2095   | 5341   | 71.03807 | 169.1361 | 1.25152  | Up | 0        | 0        |
| Stx16     | 2581 | 738    | 1883.5 | 10.23126 | 24.35254 | 1.251089 | Up | 1.08E-12 | 3.38E-12 |
| Gnpda1    | 2199 | 426.5  | 1086.5 | 6.930704 | 16.49419 | 1.250884 | Up | 5.03E-13 | 1.69E-12 |
| Csad      | 2062 | 584.5  | 1493.5 | 10.15531 | 24.16166 | 1.250486 | Up | 5.51E-13 | 1.83E-12 |
| Hbs1l     | 2721 | 2247   | 5717   | 29.49708 | 70.14623 | 1.249793 | Up | 0        | 0        |
| Slc16a11  | 1779 | 44     | 112    | 0.886961 | 2.109007 | 1.249622 | Up | 3.49E-08 | 7.92E-08 |
| Prickle3  | 2283 | 52     | 131    | 0.80725  | 1.91891  | 1.2492   | Up | 3.28E-09 | 7.73E-09 |
| Prrg4     | 1878 | 2974.5 | 7561   | 56.5621  | 134.439  | 1.249044 | Up | 0        | 0        |
| Tmem93    | 1267 | 763    | 1934   | 21.43632 | 50.94522 | 1.248889 | Up | 8.47E-13 | 2.71E-12 |
| Celf5     | 4383 | 115    | 293    | 0.938871 | 2.23106  | 1.24873  | Up | 0        | 0        |
| Zbtb40    | 4238 | 322    | 819    | 2.718783 | 6.456088 | 1.247699 | Up | 3.42E-13 | 1.19E-12 |
| LOC500251 | 1486 | 235.5  | 598    | 5.655653 | 13.42773 | 1.24745  | Up | 3.29E-13 | 1.15E-12 |
| Zgpat     | 1930 | 355.5  | 905.5  | 6.596063 | 15.65923 | 1.247336 | Up | 5.33E-13 | 1.78E-12 |
| Mlf1      | 1112 | 176.5  | 448    | 5.669051 | 13.45809 | 1.247294 | Up | 0        | 0        |
| Dcun1d5   | 1230 | 1591.5 | 4049.5 | 46.207   | 109.6929 | 1.247286 | Up | 3.50E-12 | 9.98E-12 |
| Rnf181    | 1831 | 1236   | 3138   | 24.11224 | 57.18597 | 1.245895 | Up | 2.72E-12 | 7.94E-12 |
| Zcchc4    | 2471 | 215    | 547    | 3.11301  | 7.382026 | 1.245706 | Up | 0        | 0        |
| Pcnp      | 616  | 1595   | 4058.5 | 92.6977  | 219.8125 | 1.245668 | Up | 7.92E-12 | 2.10E-11 |
| Rttm      | 7078 | 294    | 746    | 1.483903 | 3.518743 | 1.245663 | Up | 0        | 0        |
| Urb1      | 7292 | 850    | 2157   | 4.166236 | 9.869768 | 1.244272 | Up | 2.20E-12 | 6.54E-12 |
| Ocm       | 659  | 19     | 48     | 1.029946 | 2.438645 | 1.243511 | Up | 0.000358 | 0.000639 |
| Thpo      | 1406 | 30     | 76     | 0.764735 | 1.809173 | 1.242299 | Up | 6.28E-06 | 1.28E-05 |

|              |      |        |        |          |          |          |    |          |          |
|--------------|------|--------|--------|----------|----------|----------|----|----------|----------|
| Taf1b        | 1962 | 258    | 653    | 4.696672 | 11.10458 | 1.241444 | Up | 2.94E-13 | 1.04E-12 |
| Spice1       | 3056 | 231.5  | 587    | 2.708516 | 6.400313 | 1.24064  | Up | 0        | 0        |
| RGD1561984   | 447  | 26.5   | 66.5   | 2.106625 | 4.978016 | 1.240638 | Up | 2.53E-05 | 4.95E-05 |
| Ninl         | 4299 | 562    | 1426.5 | 4.681208 | 11.06098 | 1.240526 | Up | 3.62E-13 | 1.25E-12 |
| Rimbp3       | 5203 | 15     | 38     | 0.103492 | 0.244532 | 1.240503 | Up | 0.001496 | 0.002511 |
| Med4         | 1352 | 655.5  | 1655.5 | 17.32423 | 40.93382 | 1.240502 | Up | 7.02E-13 | 2.28E-12 |
| Slc25a14     | 1571 | 129.5  | 328    | 2.946566 | 6.962046 | 1.240477 | Up | 0        | 0        |
| Wdr12        | 1490 | 955.5  | 2414   | 22.90245 | 54.09776 | 1.240067 | Up | 1.30E-12 | 4.01E-12 |
| Ets2         | 3614 | 1568.5 | 3968.5 | 15.52231 | 36.65067 | 1.239497 | Up | 1.45E-12 | 4.44E-12 |
| Osgepl1      | 1835 | 286    | 723.5  | 5.557114 | 13.11978 | 1.239336 | Up | 3.49E-14 | 1.41E-13 |
| Npas3        | 2796 | 44     | 111    | 0.559421 | 1.31997  | 1.238499 | Up | 5.04E-08 | 1.14E-07 |
| Rnf182       | 1220 | 53     | 134.5  | 1.556398 | 3.671538 | 1.238174 | Up | 1.94E-09 | 4.61E-09 |
| Zfp507       | 4167 | 832    | 2107   | 7.148065 | 16.86139 | 1.238099 | Up | 0        | 0        |
| Cmc1         | 676  | 195    | 490    | 10.26271 | 24.2005  | 1.237626 | Up | 1.92E-13 | 7.02E-13 |
| Helq         | 3728 | 324    | 817.5  | 3.104994 | 7.321397 | 1.237529 | Up | 0        | 0        |
| LOC100912081 | 744  | 11.5   | 29     | 0.556569 | 1.312255 | 1.237415 | Up | 0.004325 | 0.006969 |
| Ppp1r2       | 2262 | 4490.5 | 11302  | 70.74334 | 166.7794 | 1.237275 | Up | 2.62E-11 | 6.68E-11 |
| MGC112715    | 1894 | 42     | 106    | 0.791687 | 1.865682 | 1.236701 | Up | 1.00E-07 | 2.23E-07 |
| Lpin1        | 3107 | 348    | 880    | 4.01492  | 9.455615 | 1.2358   | Up | 4.24E-14 | 1.70E-13 |
| Sh2d1b       | 399  | 82     | 206    | 7.316581 | 17.23053 | 1.235726 | Up | 9.99E-14 | 3.86E-13 |
| Acot9        | 1698 | 1774.5 | 4472   | 37.33509 | 87.91026 | 1.235499 | Up | 4.61E-12 | 1.28E-11 |
| Zfp307       | 1608 | 33.5   | 84     | 0.742809 | 1.748565 | 1.235107 | Up | 1.84E-06 | 3.86E-06 |
| Dmf1         | 3359 | 1407   | 3538   | 14.96189 | 35.1909  | 1.23391  | Up | 4.03E-12 | 1.13E-11 |
| LOC681396    | 1702 | 460    | 1154   | 9.621617 | 22.6276  | 1.233732 | Up | 1.49E-13 | 5.55E-13 |
| Cep19        | 1556 | 973    | 2449.5 | 22.34654 | 52.54836 | 1.233594 | Up | 9.37E-13 | 2.97E-12 |

|              |      |        |        |          |          |          |    |          |          |
|--------------|------|--------|--------|----------|----------|----------|----|----------|----------|
| LOC691918    | 611  | 17     | 43     | 0.995606 | 2.340806 | 1.233359 | Up | 0.00073  | 0.001254 |
| LOC100362049 | 333  | 110.5  | 278    | 11.85249 | 27.84815 | 1.232391 | Up | 0        | 0        |
| LOC682787    | 978  | 55     | 137.5  | 1.990655 | 4.676928 | 1.232318 | Up | 2.04E-09 | 4.84E-09 |
| Ranbp10      | 5211 | 1537   | 3866.5 | 10.55162 | 24.77219 | 1.231257 | Up | 4.01E-12 | 1.13E-11 |
| Ppapdc3      | 1982 | 106.5  | 268    | 1.923775 | 4.516279 | 1.231195 | Up | 0        | 0        |
| Kcnj9        | 2319 | 22     | 55.5   | 0.340459 | 0.798843 | 1.230431 | Up | 0.000149 | 0.000273 |
| LOC100360867 | 945  | 46     | 116    | 1.747897 | 4.097323 | 1.229061 | Up | 2.54E-08 | 5.80E-08 |
| LOC690183    | 729  | 495    | 1242.5 | 24.32007 | 57.00846 | 1.229029 | Up | 4.63E-13 | 1.56E-12 |
| Cenpc1       | 3148 | 1274   | 3188   | 14.43125 | 33.80818 | 1.228176 | Up | 3.25E-12 | 9.33E-12 |
| RGD1562281   | 1502 | 171.5  | 429.5  | 4.08176  | 9.56051  | 1.227896 | Up | 3.66E-13 | 1.27E-12 |
| Gfm2         | 3205 | 588.5  | 1473   | 6.560206 | 15.36293 | 1.22764  | Up | 1.12E-12 | 3.49E-12 |
| LOC688784    | 482  | 98     | 243    | 7.180253 | 16.81327 | 1.227494 | Up | 0        | 0        |
| Acot13       | 743  | 153    | 384.5  | 7.377042 | 17.27332 | 1.227431 | Up | 0        | 0        |
| Vma21        | 1541 | 826.5  | 2072   | 19.14528 | 44.82412 | 1.227287 | Up | 0        | 0        |
| Ccnc         | 3307 | 1973.5 | 4930   | 21.24969 | 49.73066 | 1.226694 | Up | 3.64E-12 | 1.03E-11 |
| Nubpl        | 1157 | 136    | 339.5  | 4.180877 | 9.782344 | 1.226375 | Up | 1.95E-13 | 7.10E-13 |
| Nfkbie       | 1669 | 498    | 1252.5 | 10.70285 | 25.03974 | 1.226225 | Up | 6.50E-13 | 2.13E-12 |
| Mtf1         | 5300 | 552    | 1383.5 | 3.726425 | 8.714793 | 1.225674 | Up | 0        | 0        |
| RGD1560849   | 2317 | 17     | 42.5   | 0.262297 | 0.613375 | 1.225569 | Up | 0.001066 | 0.001805 |
| Ska3         | 1603 | 1176   | 2948   | 26.23822 | 61.35628 | 1.225541 | Up | 5.76E-12 | 1.56E-11 |
| Phldb2       | 3861 | 1085.5 | 2718   | 10.05203 | 23.49818 | 1.225062 | Up | 3.86E-12 | 1.09E-11 |
| Rps6kb1      | 2287 | 1618   | 4051   | 25.28798 | 59.09216 | 1.224515 | Up | 3.72E-12 | 1.05E-11 |
| RGD1563300   | 471  | 14     | 35     | 1.061186 | 2.479062 | 1.224118 | Up | 0.002602 | 0.004274 |
| Fem1b        | 2199 | 1082.5 | 2708.5 | 17.59947 | 41.1042  | 1.223754 | Up | 2.04E-12 | 6.10E-12 |
| Utp3         | 1678 | 1513.5 | 3777.5 | 32.21462 | 75.23119 | 1.223615 | Up | 2.80E-13 | 9.96E-13 |

|              |      |        |        |          |          |          |    |          |          |
|--------------|------|--------|--------|----------|----------|----------|----|----------|----------|
| Hint3        | 900  | 247    | 617.5  | 9.779095 | 22.83156 | 1.223257 | Up | 0        | 0        |
| Ubox5        | 3686 | 315.5  | 790    | 3.07038  | 7.165866 | 1.222724 | Up | 4.99E-13 | 1.67E-12 |
| Dnal1        | 619  | 138    | 344.5  | 7.959921 | 18.56738 | 1.221944 | Up | 1.83E-13 | 6.73E-13 |
| LOC100912278 | 1933 | 755.5  | 1884.5 | 13.95908 | 32.54609 | 1.22128  | Up | 1.01E-12 | 3.19E-12 |
| Zfp423       | 4667 | 15     | 38     | 0.116361 | 0.271073 | 1.220076 | Up | 0.001496 | 0.00251  |
| Tmbim4       | 894  | 703.5  | 1747.5 | 27.99632 | 65.21331 | 1.219929 | Up | 4.27E-13 | 1.45E-12 |
| Dtx2         | 2665 | 670    | 1677.5 | 9.02155  | 21.01434 | 1.219927 | Up | 2.10E-13 | 7.62E-13 |
| Rn28s        | 4786 | 233538 | 587627 | 1750.991 | 4076.151 | 1.219036 | Up | 8.21E-10 | 1.98E-09 |
| Zfp512       | 3424 | 588.5  | 1463.5 | 6.136092 | 14.28413 | 1.219021 | Up | 1.12E-12 | 3.49E-12 |
| Klhl12       | 1921 | 205    | 509    | 3.807572 | 8.861368 | 1.218658 | Up | 4.23E-13 | 1.44E-12 |
| Car11        | 1346 | 32     | 80     | 0.853272 | 1.985026 | 1.21808  | Up | 4.55E-06 | 9.32E-06 |
| Gtsf1        | 852  | 22     | 54.5   | 0.916577 | 2.131961 | 1.217854 | Up | 0.000217 | 0.000393 |
| LOC681367    | 1017 | 106.5  | 265    | 3.738472 | 8.693417 | 1.217475 | Up | 0        | 0        |
| Lias         | 1636 | 242    | 601.5  | 5.284006 | 12.27709 | 1.216265 | Up | 3.84E-13 | 1.32E-12 |
| Car12        | 1065 | 204    | 509.5  | 6.861253 | 15.94153 | 1.216246 | Up | 1.72E-13 | 6.33E-13 |
| LOC100912062 | 1312 | 26     | 65     | 0.708245 | 1.645154 | 1.215903 | Up | 3.67E-05 | 7.11E-05 |
| Timm21       | 1415 | 686    | 1707   | 17.32765 | 40.24345 | 1.215678 | Up | 0        | 0        |
| Cntd1        | 2501 | 168.5  | 416    | 2.390763 | 5.551545 | 1.215418 | Up | 1.69E-13 | 6.23E-13 |
| LOC100362431 | 3455 | 70.5   | 175.5  | 0.731077 | 1.697087 | 1.214965 | Up | 1.03E-11 | 2.71E-11 |
| Fam175b      | 2940 | 1089.5 | 2709.5 | 13.24732 | 30.7449  | 1.214647 | Up | 3.07E-12 | 8.87E-12 |
| lsg15        | 663  | 41     | 102.5  | 2.216299 | 5.143285 | 1.214537 | Up | 2.45E-07 | 5.37E-07 |
| Ube2b        | 2109 | 2868.5 | 7114   | 48.49954 | 112.55   | 1.214523 | Up | 0        | 0        |
| Sh2b1        | 2791 | 1316.5 | 3275.5 | 16.90537 | 39.18207 | 1.212712 | Up | 3.15E-12 | 9.10E-12 |
| Sgol1        | 1727 | 695    | 1725.5 | 14.40032 | 33.3513  | 1.211642 | Up | 7.07E-13 | 2.29E-12 |
| Myocd        | 4952 | 12     | 30     | 0.086712 | 0.200809 | 1.211514 | Up | 0.005402 | 0.008656 |

|              |      |        |        |          |          |          |    |          |          |
|--------------|------|--------|--------|----------|----------|----------|----|----------|----------|
| Grin3b       | 3178 | 158.5  | 394.5  | 1.787094 | 4.136106 | 1.210658 | Up | 1.62E-14 | 6.66E-14 |
| Mnd1         | 893  | 179.5  | 445.5  | 7.199453 | 16.66156 | 1.210564 | Up | 0        | 0        |
| LOC100361188 | 1198 | 134.5  | 331    | 3.99227  | 9.238844 | 1.210503 | Up | 0        | 0        |
| RGD1559704   | 1002 | 13     | 32.5   | 0.463681 | 1.072576 | 1.209874 | Up | 0.004534 | 0.007293 |
| Zfp324       | 794  | 39.5   | 98.5   | 1.79062  | 4.141248 | 1.209606 | Up | 3.37E-07 | 7.35E-07 |
| Zfp68        | 4654 | 1160.5 | 2866.5 | 8.885593 | 20.5421  | 1.209044 | Up | 3.48E-12 | 9.94E-12 |
| LOC100910104 | 3986 | 20     | 49.5   | 0.179257 | 0.414274 | 1.208558 | Up | 0.00044  | 0.000782 |
| Dpf2         | 2404 | 2084.5 | 5159   | 31.00426 | 71.64907 | 1.208482 | Up | 0        | 0        |
| LOC100910127 | 2325 | 18.5   | 45.5   | 0.28411  | 0.655893 | 1.207009 | Up | 0.000617 | 0.001067 |
| Abcd4        | 2358 | 248.5  | 615    | 3.76582  | 8.690962 | 1.206552 | Up | 7.11E-14 | 2.79E-13 |
| LOC100359945 | 3117 | 219    | 541.5  | 2.510998 | 5.794196 | 1.206348 | Up | 3.38E-13 | 1.18E-12 |
| Yipf4        | 1847 | 1234.5 | 3040.5 | 23.7748  | 54.83679 | 1.205711 | Up | 5.53E-12 | 1.50E-11 |
| Rpp30        | 1444 | 732    | 1806   | 18.11718 | 41.78344 | 1.205572 | Up | 0        | 0        |
| Cyp19a1      | 2863 | 300    | 744    | 3.758766 | 8.667966 | 1.205434 | Up | 2.14E-13 | 7.75E-13 |
| Ier2         | 1564 | 2452.5 | 6077.5 | 56.24771 | 129.7054 | 1.205373 | Up | 0        | 0        |
| Sdr42e1      | 2635 | 36.5   | 90     | 0.493602 | 1.137956 | 1.205025 | Up | 1.14E-06 | 2.42E-06 |
| Pat1         | 4007 | 2002.5 | 4949   | 17.87288 | 41.20422 | 1.20502  | Up | 0        | 0        |
| LOC100360884 | 355  | 28     | 69     | 2.812648 | 6.481662 | 1.204435 | Up | 2.64E-05 | 5.17E-05 |
| Zc3h7a       | 3542 | 1489   | 3664.5 | 15.01194 | 34.55153 | 1.202639 | Up | 5.61E-12 | 1.52E-11 |
| Trim11       | 2373 | 350    | 866.5  | 5.291295 | 12.1781  | 1.202596 | Up | 3.03E-13 | 1.07E-12 |
| Zfp691       | 1483 | 62.5   | 153.5  | 1.504773 | 3.462121 | 1.202111 | Up | 3.23E-10 | 7.87E-10 |
| Lcn2         | 876  | 91     | 224.5  | 3.717863 | 8.550672 | 1.201564 | Up | 0        | 0        |
| Scn3a        | 6822 | 13.5   | 33.5   | 0.071189 | 0.163619 | 1.200605 | Up | 0.003088 | 0.005043 |
| LOC100360290 | 476  | 54     | 131.5  | 4.013664 | 9.224403 | 1.200536 | Up | 1.01E-08 | 2.34E-08 |
| Rhpn2        | 3185 | 90.5   | 223    | 1.01613  | 2.335058 | 1.200373 | Up | 0        | 0        |

|              |      |        |          |          |          |          |    |          |          |
|--------------|------|--------|----------|----------|----------|----------|----|----------|----------|
| LOC100911625 | 2213 | 1990.5 | 4901.5   | 32.21362 | 74.01709 | 1.200188 | Up | 0        | 0        |
| Topors       | 3887 | 1950.5 | 4800     | 17.93976 | 41.21986 | 1.200179 | Up | 4.74E-12 | 1.31E-11 |
| Nxt2         | 2447 | 268    | 657      | 3.897487 | 8.954162 | 1.200014 | Up | 1.39E-13 | 5.23E-13 |
| Cnppd1       | 2235 | 1550.5 | 3811     | 24.80038 | 56.92736 | 1.19876  | Up | 3.74E-12 | 1.06E-11 |
| Sgms1        | 2283 | 821.5  | 2018.5   | 12.87613 | 29.55166 | 1.19854  | Up | 0        | 0        |
| RGD1311517   | 1779 | 201.5  | 496      | 4.05447  | 9.304474 | 1.198411 | Up | 0        | 0        |
| Heatr8       | 4238 | 17     | 41.5     | 0.142456 | 0.326829 | 1.198024 | Up | 0.001547 | 0.002593 |
| Dock2        | 6183 | 30.5   | 75       | 0.176468 | 0.404401 | 1.196379 | Up | 9.10E-06 | 1.84E-05 |
| Sdad1        | 2274 | 780    | 1912     | 12.26258 | 28.09925 | 1.196268 | Up | 1.66E-12 | 5.03E-12 |
| Zfp167       | 4837 | 101.5  | 250.5    | 0.751412 | 1.721138 | 1.195687 | Up | 0        | 0        |
| Arv1         | 1142 | 318.5  | 782.5    | 9.985599 | 22.86053 | 1.194938 | Up | 1.88E-13 | 6.87E-13 |
| Lsm3         | 709  | 1398   | 3424.5   | 70.46001 | 161.287  | 1.194754 | Up | 7.63E-12 | 2.03E-11 |
| Setd5        | 7114 | 4503   | 11051.5  | 22.64683 | 51.83881 | 1.194724 | Up | 1.22E-11 | 3.19E-11 |
| LOC688452    | 1112 | 72     | 176      | 2.315869 | 5.300431 | 1.194556 | Up | 2.21E-11 | 5.67E-11 |
| Pogz         | 6063 | 1776.5 | 4356.5   | 10.48166 | 23.98771 | 1.194429 | Up | 3.75E-12 | 1.06E-11 |
| Rsl24d1      | 1543 | 1585.5 | 3876     | 36.64898 | 83.85566 | 1.194135 | Up | 4.62E-12 | 1.28E-11 |
| Cyp1b1       | 2321 | 584    | 1428.5   | 8.99794  | 20.58243 | 1.193746 | Up | 5.51E-13 | 1.83E-12 |
| Sar1b        | 1190 | 1508.5 | 3681.5   | 45.20221 | 103.3904 | 1.193637 | Up | 2.75E-12 | 8.01E-12 |
| Polk         | 3821 | 433    | 1060.5   | 4.050944 | 9.26411  | 1.193394 | Up | 1.10E-12 | 3.43E-12 |
| Rab11fip2    | 1564 | 127.5  | 311.5    | 2.908495 | 6.65105  | 1.193309 | Up | 9.17E-14 | 3.56E-13 |
| Crebl2       | 3505 | 338.5  | 827.5    | 3.446896 | 7.880153 | 1.192926 | Up | 1.46E-13 | 5.43E-13 |
| Serpine1     | 3053 | 44546  | 109094.5 | 522.9182 | 1193.478 | 1.190514 | Up | 2.00E-10 | 4.91E-10 |
| Lin7c        | 594  | 868    | 2121     | 52.29413 | 119.3403 | 1.19036  | Up | 0        | 0        |
| Hist1h2ac    | 606  | 36     | 89       | 2.138984 | 4.881066 | 1.19027  | Up | 1.64E-06 | 3.46E-06 |
| Wibg         | 1164 | 959.5  | 2351.5   | 29.55692 | 67.44187 | 1.190148 | Up | 0        | 0        |

|              |      |        |        |          |          |          |    |          |          |
|--------------|------|--------|--------|----------|----------|----------|----|----------|----------|
| Parp11       | 1375 | 189    | 461.5  | 4.90564  | 11.19045 | 1.189754 | Up | 2.87E-13 | 1.02E-12 |
| Kcnk3        | 2077 | 42     | 102    | 0.719172 | 1.640469 | 1.189699 | Up | 4.29E-07 | 9.31E-07 |
| Eif4ebp3     | 634  | 135.5  | 330.5  | 7.648131 | 17.43627 | 1.188912 | Up | 2.15E-13 | 7.77E-13 |
| Gng7         | 2897 | 14.5   | 35     | 0.177617 | 0.404915 | 1.18885  | Up | 0.002602 | 0.004275 |
| Gcfc1        | 3793 | 563.5  | 1370.5 | 5.287874 | 12.05264 | 1.18859  | Up | 1.35E-13 | 5.08E-13 |
| Pum1         | 5009 | 3600   | 8812   | 25.74351 | 58.67284 | 1.188484 | Up | 0        | 0        |
| Atp5s        | 2015 | 72     | 175.5  | 1.277469 | 2.910787 | 1.188122 | Up | 3.16E-11 | 8.00E-11 |
| Kansl2       | 2082 | 1914.5 | 4671.5 | 32.88059 | 74.8883  | 1.187504 | Up | 4.86E-12 | 1.34E-11 |
| LOC100366237 | 821  | 1496.5 | 3643   | 65.01357 | 148.0674 | 1.187441 | Up | 1.49E-12 | 4.56E-12 |
| Epcam        | 1469 | 300.5  | 732    | 7.316143 | 16.64455 | 1.185895 | Up | 2.14E-13 | 7.76E-13 |
| Pex3         | 1952 | 522.5  | 1273   | 9.560768 | 21.74514 | 1.185494 | Up | 0        | 0        |
| RGD1560925   | 3966 | 14     | 34     | 0.125447 | 0.285313 | 1.185462 | Up | 0.003802 | 0.006181 |
| Rbm44        | 3057 | 374    | 909    | 4.363542 | 9.923753 | 1.185386 | Up | 4.81E-13 | 1.62E-12 |
| Rpl35a       | 348  | 290    | 703.5  | 29.70401 | 67.55136 | 1.185327 | Up | 2.80E-13 | 9.94E-13 |
| Anapc10      | 1113 | 411    | 1000   | 13.20345 | 30.02544 | 1.18527  | Up | 0        | 0        |
| Ercc5        | 3750 | 316    | 769.5  | 3.011052 | 6.845574 | 1.184904 | Up | 3.85E-13 | 1.32E-12 |
| Nif3l1       | 1534 | 325.5  | 792    | 7.585194 | 17.23165 | 1.183803 | Up | 9.53E-14 | 3.69E-13 |
| Flrt2        | 2900 | 517.5  | 1261   | 6.386544 | 14.50664 | 1.183607 | Up | 5.77E-14 | 2.29E-13 |
| Rbbp5        | 3852 | 1361.5 | 3313.5 | 12.64061 | 28.69991 | 1.18298  | Up | 2.75E-12 | 8.01E-12 |
| Pabpc1l      | 2182 | 22     | 54     | 0.362887 | 0.82378  | 1.18274  | Up | 0.000217 | 0.000393 |
| Btrc         | 2334 | 963    | 2343.5 | 14.77214 | 33.531   | 1.182616 | Up | 1.71E-12 | 5.17E-12 |
| Dusp11       | 1155 | 495    | 1202   | 15.30241 | 34.73372 | 1.182578 | Up | 4.63E-13 | 1.56E-12 |
| Surf6        | 2049 | 1089.5 | 2653   | 19.03502 | 43.20347 | 1.182491 | Up | 3.07E-12 | 8.87E-12 |
| Smek1        | 4388 | 3051   | 7420.5 | 24.85793 | 56.40788 | 1.182191 | Up | 0        | 0        |
| St6galnac2   | 2035 | 13.5   | 33     | 0.239214 | 0.542735 | 1.181944 | Up | 0.003088 | 0.005042 |

|              |      |        |         |          |          |          |    |          |          |
|--------------|------|--------|---------|----------|----------|----------|----|----------|----------|
| Taf9         | 1703 | 4350.5 | 10541.5 | 91.07159 | 206.5882 | 1.181685 | Up | 2.71E-11 | 6.89E-11 |
| Hoxa6        | 876  | 14.5   | 35.5    | 0.595903 | 1.351463 | 1.181374 | Up | 0.002602 | 0.004274 |
| Psmc9        | 1448 | 2067.5 | 5039    | 51.13064 | 115.9316 | 1.181014 | Up | 0        | 0        |
| Impact       | 3386 | 2042.5 | 4948.5  | 21.51968 | 48.78588 | 1.180807 | Up | 0        | 0        |
| Rgs7bp       | 1364 | 75     | 182     | 1.967133 | 4.457478 | 1.180133 | Up | 1.36E-11 | 3.53E-11 |
| LOC688292    | 3396 | 100    | 244     | 1.060104 | 2.401997 | 1.180028 | Up | 2.09E-14 | 8.54E-14 |
| Endou        | 1236 | 12.5   | 30.5    | 0.363509 | 0.823501 | 1.179779 | Up | 0.005402 | 0.008655 |
| LOC100125367 | 1993 | 254.5  | 616.5   | 4.557181 | 10.32379 | 1.17976  | Up | 3.19E-13 | 1.12E-12 |
| Eif5         | 3504 | 8237   | 19916.5 | 83.74844 | 189.701  | 1.179593 | Up | 5.27E-12 | 1.44E-11 |
| Aurkc        | 621  | 41.5   | 100     | 2.369611 | 5.364704 | 1.178848 | Up | 5.06E-07 | 1.09E-06 |
| Cebpb        | 1841 | 784.5  | 1909.5  | 15.25241 | 34.5286  | 1.178755 | Up | 1.17E-13 | 4.46E-13 |
| Ccdc150      | 3309 | 64     | 155.5   | 0.691744 | 1.56582  | 1.178609 | Up | 4.78E-10 | 1.16E-09 |
| Frmf5        | 2578 | 181    | 440.5   | 2.521441 | 5.706339 | 1.178317 | Up | 1.41E-13 | 5.29E-13 |
| Nmd3         | 1848 | 1728.5 | 4186    | 33.42821 | 75.62862 | 1.177866 | Up | 5.07E-12 | 1.39E-11 |
| Ireb2        | 3323 | 1606   | 3883    | 17.23185 | 38.95717 | 1.176811 | Up | 4.80E-12 | 1.32E-11 |
| Tbccd1       | 2167 | 492    | 1193    | 8.132764 | 18.38296 | 1.176551 | Up | 0        | 0        |
| LOC501110    | 2039 | 32     | 77.5    | 0.562143 | 1.270539 | 1.17643  | Up | 1.36E-05 | 2.70E-05 |
| Rarb         | 3092 | 188    | 456     | 2.175509 | 4.915357 | 1.175943 | Up | 1.80E-13 | 6.63E-13 |
| LOC100912350 | 2265 | 244    | 591.5   | 3.854288 | 8.707571 | 1.175806 | Up | 2.85E-13 | 1.01E-12 |
| Prpf38a      | 1656 | 1217   | 2942    | 26.2619  | 59.32705 | 1.175719 | Up | 2.01E-12 | 6.01E-12 |
| Qtrt1        | 1431 | 192    | 464.5   | 4.802708 | 10.84893 | 1.175633 | Up | 0        | 0        |
| Scn3b        | 3910 | 23     | 55.5    | 0.209756 | 0.47379  | 1.175533 | Up | 0.000264 | 0.000474 |
| LOC100912536 | 1208 | 494    | 1190.5  | 14.562   | 32.88638 | 1.175281 | Up | 0        | 0        |
| Arhgap20     | 3884 | 131    | 316.5   | 1.206163 | 2.723063 | 1.174806 | Up | 8.62E-14 | 3.36E-13 |
| Mbnl2        | 4595 | 3972   | 9603.5  | 30.90995 | 69.75525 | 1.174231 | Up | 1.04E-11 | 2.73E-11 |



|              |      |        |         |          |          |          |    |          |          |
|--------------|------|--------|---------|----------|----------|----------|----|----------|----------|
| Atad5        | 6120 | 881    | 2125.5  | 5.136625 | 11.59074 | 1.17408  | Up | 5.46E-13 | 1.82E-12 |
| Fastkd2      | 2240 | 375    | 904     | 5.973601 | 13.47517 | 1.173631 | Up | 0        | 0        |
| Zscan21      | 2218 | 413    | 997     | 6.657027 | 15.01643 | 1.173592 | Up | 4.70E-13 | 1.58E-12 |
| Lrr1         | 1496 | 77     | 185.5   | 1.832968 | 4.13416  | 1.173413 | Up | 1.41E-11 | 3.66E-11 |
| Acvr2a       | 2277 | 477.5  | 1150    | 7.487203 | 16.8806  | 1.172868 | Up | 0        | 0        |
| Rrp15        | 1190 | 987.5  | 2384    | 29.69431 | 66.93955 | 1.172672 | Up | 1.20E-12 | 3.72E-12 |
| Repin1       | 1716 | 336.5  | 818     | 7.051854 | 15.89523 | 1.172519 | Up | 2.61E-13 | 9.32E-13 |
| Junb         | 1822 | 13518  | 32890   | 266.6417 | 601.0154 | 1.1725   | Up | 0        | 0        |
| Glyctk       | 2002 | 139.5  | 338     | 2.498686 | 5.631789 | 1.172424 | Up | 1.77E-13 | 6.53E-13 |
| Tub          | 1582 | 68     | 164.5   | 1.539903 | 3.470215 | 1.172185 | Up | 1.75E-10 | 4.31E-10 |
| Gins4        | 1079 | 821.5  | 1982.5  | 27.23756 | 61.37786 | 1.172121 | Up | 0        | 0        |
| Thoc2        | 7636 | 2754.5 | 6620    | 12.86065 | 28.95069 | 1.170634 | Up | 0        | 0        |
| LOC100363376 | 606  | 562    | 1345.5  | 33.00437 | 74.16651 | 1.168111 | Up | 3.62E-13 | 1.25E-12 |
| Dram2        | 1435 | 562    | 1351    | 13.96731 | 31.37601 | 1.167608 | Up | 3.62E-13 | 1.25E-12 |
| Fam107b      | 3085 | 82     | 196.5   | 0.946665 | 2.126145 | 1.167314 | Up | 4.36E-12 | 1.21E-11 |
| Dkk4         | 1491 | 205    | 492     | 4.901818 | 11.00611 | 1.166916 | Up | 4.23E-13 | 1.44E-12 |
| Ube2d3       | 1531 | 8619.5 | 20693.5 | 200.9609 | 451.2151 | 1.1669   | Up | 3.42E-12 | 9.79E-12 |
| Ttc17        | 4540 | 983    | 2368.5  | 7.759652 | 17.41489 | 1.166258 | Up | 3.73E-13 | 1.29E-12 |
| Eps8l2       | 3140 | 39     | 94      | 0.445355 | 0.998905 | 1.165392 | Up | 1.44E-06 | 3.04E-06 |
| Ccdc134      | 1583 | 363.5  | 873     | 8.21083  | 18.41174 | 1.165026 | Up | 0        | 0        |
| Lacc1        | 1482 | 180    | 432     | 4.340725 | 9.732795 | 1.164918 | Up | 3.16E-13 | 1.11E-12 |
| Parg         | 3974 | 1696   | 4073.5  | 15.2575  | 34.20632 | 1.164744 | Up | 6.20E-12 | 1.67E-11 |
| Mak16        | 1741 | 1301   | 3123    | 26.70851 | 59.87623 | 1.164684 | Up | 4.03E-13 | 1.38E-12 |
| Magoh        | 669  | 1597   | 3842.5  | 85.46434 | 191.5529 | 1.164348 | Up | 8.39E-12 | 2.22E-11 |
| Ddx47        | 1747 | 1931   | 4635.5  | 39.49329 | 88.49886 | 1.164051 | Up | 4.86E-12 | 1.34E-11 |

|              |       |        |        |          |          |          |    |          |          |
|--------------|-------|--------|--------|----------|----------|----------|----|----------|----------|
| LOC100361180 | 456   | 181.5  | 431    | 14.08108 | 31.55245 | 1.163994 | Up | 1.41E-13 | 5.30E-13 |
| Ndufs4       | 1512  | 1269.5 | 3039.5 | 29.94388 | 67.0757  | 1.163529 | Up | 6.03E-12 | 1.62E-11 |
| Tmem178b     | 10116 | 89     | 214    | 0.314762 | 0.70495  | 1.163259 | Up | 3.27E-13 | 1.14E-12 |
| LOC100363472 | 866   | 45     | 108    | 1.856095 | 4.156438 | 1.163077 | Up | 2.62E-07 | 5.72E-07 |
| U2surp       | 4113  | 3524   | 8442.5 | 30.60663 | 68.52765 | 1.162842 | Up | 4.43E-13 | 1.50E-12 |
| Mki67ip      | 1490  | 1292   | 3093   | 30.9354  | 69.24463 | 1.162444 | Up | 5.07E-12 | 1.39E-11 |
| Shq1         | 2322  | 218    | 522.5  | 3.353073 | 7.504806 | 1.162331 | Up | 0        | 0        |
| Jmjd4        | 1281  | 83.5   | 199.5  | 2.327774 | 5.209773 | 1.162269 | Up | 2.77E-12 | 8.08E-12 |
| Dph3         | 3242  | 1257.5 | 3010.5 | 13.84388 | 30.9832  | 1.162238 | Up | 5.54E-12 | 1.50E-11 |
| Znrf2        | 5774  | 452.5  | 1083   | 2.799265 | 6.26204  | 1.161585 | Up | 6.60E-13 | 2.15E-12 |
| Tnrc6a       | 7938  | 3133   | 7509.5 | 14.11707 | 31.57464 | 1.161326 | Up | 0        | 0        |
| Zfc3h1       | 7029  | 1741   | 4162.5 | 8.843911 | 19.77817 | 1.161152 | Up | 1.89E-12 | 5.68E-12 |
| Calcr1       | 2095  | 68     | 163    | 1.161461 | 2.597208 | 1.161021 | Up | 2.49E-10 | 6.09E-10 |
| Oraov1       | 2664  | 841.5  | 2012   | 11.27441 | 25.20847 | 1.160856 | Up | 9.66E-13 | 3.06E-12 |
| LOC100912478 | 2628  | 250    | 598.5  | 3.39509  | 7.589291 | 1.160515 | Up | 2.66E-13 | 9.47E-13 |
| Uqcc         | 1388  | 643    | 1537   | 16.54459 | 36.97473 | 1.16018  | Up | 0        | 0        |
| RGD1308139   | 2880  | 969    | 2318   | 12.03499 | 26.88175 | 1.159392 | Up | 1.75E-12 | 5.29E-12 |
| Supv3l1      | 2415  | 867    | 2076.5 | 12.84854 | 28.66856 | 1.157865 | Up | 0        | 0        |
| Lingo1       | 2510  | 24     | 58     | 0.341694 | 0.762165 | 1.157401 | Up | 0.000155 | 0.000282 |
| LOC687756    | 1788  | 22     | 52.5   | 0.43772  | 0.976039 | 1.15693  | Up | 0.00045  | 0.000799 |
| Erc8         | 2521  | 525.5  | 1253   | 7.444309 | 16.59836 | 1.156831 | Up | 4.15E-14 | 1.66E-13 |
| Ndor1        | 2338  | 251    | 600.5  | 3.847947 | 8.578841 | 1.156694 | Up | 1.37E-13 | 5.15E-13 |
| Gng5         | 1392  | 2421.5 | 5769   | 61.989   | 138.1943 | 1.156613 | Up | 0        | 0        |
| Acer3        | 1840  | 1788.5 | 4247   | 34.58582 | 77.05793 | 1.155763 | Up | 1.02E-12 | 3.21E-12 |
| Tdrkh        | 1970  | 585    | 1395.5 | 10.61114 | 23.63327 | 1.15524  | Up | 8.75E-13 | 2.79E-12 |

|              |      |        |        |          |          |          |    |          |          |
|--------------|------|--------|--------|----------|----------|----------|----|----------|----------|
| Zfp839       | 2751 | 28     | 66.5   | 0.364206 | 0.81115  | 1.155214 | Up | 7.80E-05 | 0.000146 |
| LOC100911233 | 2419 | 1117   | 2666   | 16.52947 | 36.80258 | 1.154767 | Up | 4.68E-12 | 1.29E-11 |
| RGD1305225   | 1793 | 410    | 975    | 8.169014 | 18.18625 | 1.154614 | Up | 1.10E-12 | 3.45E-12 |
| Krr1         | 1691 | 786    | 1871.5 | 16.59795 | 36.94179 | 1.154249 | Up | 0        | 0        |
| Cib2         | 1433 | 126    | 301    | 3.142326 | 6.990879 | 1.153641 | Up | 1.12E-13 | 4.31E-13 |
| Plrg1        | 1830 | 1646   | 3918.5 | 32.10639 | 71.4231  | 1.15353  | Up | 5.04E-12 | 1.38E-11 |
| Procr        | 1400 | 222.5  | 532.5  | 5.703567 | 12.68638 | 1.153344 | Up | 0        | 0        |
| Casp8ap2     | 6781 | 1692.5 | 4021   | 8.904278 | 19.79587 | 1.152629 | Up | 8.42E-12 | 2.23E-11 |
| LOC100359464 | 2771 | 110.5  | 264    | 1.425594 | 3.168501 | 1.152238 | Up | 0        | 0        |
| Msl2         | 4957 | 1258   | 2992   | 9.07017  | 20.13799 | 1.150719 | Up | 2.27E-12 | 6.73E-12 |
| Pot1         | 2730 | 618.5  | 1466.5 | 8.077212 | 17.92762 | 1.150255 | Up | 2.89E-15 | 1.22E-14 |
| Tlr4         | 3373 | 661    | 1563.5 | 6.976836 | 15.48486 | 1.150213 | Up | 0        | 0        |
| Cnkr3        | 3350 | 1822   | 4337.5 | 19.47533 | 43.21568 | 1.149907 | Up | 1.27E-12 | 3.92E-12 |
| Ptp4a2       | 1095 | 3857   | 9151.5 | 125.7995 | 279.137  | 1.149848 | Up | 1.16E-11 | 3.04E-11 |
| RGD1560891   | 3368 | 21.5   | 51     | 0.227149 | 0.50369  | 1.148895 | Up | 0.000371 | 0.000662 |
| Ctdspl2      | 1621 | 892    | 2115   | 19.66241 | 43.58477 | 1.148384 | Up | 4.11E-13 | 1.40E-12 |
| Nek11        | 2646 | 59     | 140    | 0.795504 | 1.763096 | 1.148171 | Up | 6.31E-09 | 1.47E-08 |
| Hspa1a       | 4045 | 403    | 961    | 3.576537 | 7.925939 | 1.148019 | Up | 0        | 0        |
| Zfp647       | 2350 | 34     | 81     | 0.518203 | 1.148099 | 1.147657 | Up | 9.69E-06 | 1.94E-05 |
| Tmem80       | 2195 | 208    | 494.5  | 3.388759 | 7.505343 | 1.147161 | Up | 3.49E-13 | 1.21E-12 |
| Lsm16        | 2298 | 645    | 1534   | 10.05333 | 22.26187 | 1.146901 | Up | 5.31E-13 | 1.77E-12 |
| Pcgf1        | 828  | 113.5  | 268.5  | 4.9068   | 10.86185 | 1.146415 | Up | 2.09E-13 | 7.59E-13 |
| Baiap2       | 1798 | 1673   | 3983   | 33.39535 | 73.91322 | 1.146185 | Up | 4.20E-12 | 1.18E-11 |
| Rm3          | 3445 | 2379   | 5640   | 24.67806 | 54.60688 | 1.145854 | Up | 0        | 0        |
| Bcl6b        | 3338 | 32     | 76     | 0.343382 | 0.759616 | 1.145454 | Up | 1.94E-05 | 3.82E-05 |

|              |      |        |         |          |          |          |    |          |          |
|--------------|------|--------|---------|----------|----------|----------|----|----------|----------|
| Ptpn12       | 3167 | 4698.5 | 11098.5 | 52.90761 | 117.0078 | 1.145058 | Up | 7.09E-12 | 1.89E-11 |
| C1H6orf35    | 988  | 455.5  | 1077.5  | 16.48185 | 36.43445 | 1.144425 | Up | 3.90E-13 | 1.34E-12 |
| LOC685596    | 336  | 51.5   | 121.5   | 5.468419 | 12.08764 | 1.144337 | Up | 6.79E-08 | 1.53E-07 |
| Ak8          | 1581 | 26.5   | 63      | 0.599601 | 1.325281 | 1.144224 | Up | 7.66E-05 | 0.000144 |
| Mtfp1        | 1382 | 36     | 85      | 0.930465 | 2.055412 | 1.143404 | Up | 6.91E-06 | 1.40E-05 |
| Ufsp2        | 1539 | 931    | 2202.5  | 21.65    | 47.80319 | 1.14274  | Up | 6.36E-13 | 2.08E-12 |
| Txn1         | 1301 | 3812.5 | 9005.5  | 104.6589 | 231.0673 | 1.142618 | Up | 4.19E-12 | 1.17E-11 |
| LOC100363539 | 464  | 1341   | 3160.5  | 103.1138 | 227.5678 | 1.142059 | Up | 4.62E-12 | 1.28E-11 |
| Ccdc111      | 1783 | 267.5  | 632.5   | 5.36479  | 11.8373  | 1.141747 | Up | 7.08E-13 | 2.29E-12 |
| Rpgrip1      | 7081 | 710    | 1677    | 3.58339  | 7.906395 | 1.141695 | Up | 3.82E-13 | 1.31E-12 |
| Egfr         | 4161 | 268    | 633     | 2.303885 | 5.083142 | 1.141652 | Up | 1.39E-13 | 5.23E-13 |
| Casp8        | 2003 | 375    | 886.5   | 6.693009 | 14.76598 | 1.14155  | Up | 0        | 0        |
| Gpr3         | 969  | 15     | 35.5    | 0.555695 | 1.225472 | 1.140971 | Up | 0.004601 | 0.007398 |
| Csrp2        | 842  | 568    | 1337.5  | 24.05981 | 53.05191 | 1.14078  | Up | 1.29E-13 | 4.89E-13 |
| Crtap        | 839  | 579    | 1367.5  | 24.69974 | 54.45365 | 1.140533 | Up | 9.45E-13 | 3.00E-12 |
| Tmem222      | 1490 | 780.5  | 1847    | 18.74359 | 41.32157 | 1.140498 | Up | 1.66E-12 | 5.04E-12 |
| Gprc5a       | 2094 | 274.5  | 650     | 4.685716 | 10.32924 | 1.140393 | Up | 1.86E-13 | 6.82E-13 |
| LOC100912698 | 992  | 42     | 99      | 1.515016 | 3.338301 | 1.139781 | Up | 1.24E-06 | 2.63E-06 |
| Bdkrb1       | 1312 | 82.5   | 195     | 2.248122 | 4.953299 | 1.139669 | Up | 6.20E-12 | 1.67E-11 |
| Zfp346       | 3298 | 287.5  | 680.5   | 3.123629 | 6.880071 | 1.1392   | Up | 4.35E-13 | 1.48E-12 |
| Slc38a9      | 1807 | 131.5  | 309.5   | 2.597849 | 5.721178 | 1.138995 | Up | 8.62E-14 | 3.36E-13 |
| Apool        | 1445 | 464    | 1091.5  | 11.45494 | 25.21948 | 1.138569 | Up | 0        | 0        |
| RGD1311756   | 3102 | 1069.5 | 2522.5  | 12.32589 | 27.13471 | 1.138448 | Up | 2.20E-12 | 6.53E-12 |
| RGD1564943   | 2954 | 728    | 1711.5  | 8.791051 | 19.34668 | 1.137978 | Up | 1.26E-12 | 3.91E-12 |
| Mrps18b      | 1064 | 1507.5 | 3566.5  | 50.79149 | 111.7692 | 1.137864 | Up | 7.77E-12 | 2.06E-11 |

|              |      |        |         |          |          |          |    |          |          |
|--------------|------|--------|---------|----------|----------|----------|----|----------|----------|
| Spin4        | 750  | 40.5   | 95.5    | 1.925796 | 4.237454 | 1.137743 | Up | 1.74E-06 | 3.65E-06 |
| LOC100910678 | 304  | 217    | 510     | 25.40682 | 55.87754 | 1.137053 | Up | 2.24E-13 | 8.07E-13 |
| Ndufa7       | 523  | 1043.5 | 2457.5  | 71.2019  | 156.533  | 1.136479 | Up | 7.12E-13 | 2.30E-12 |
| Vps37a       | 1743 | 747    | 1758.5  | 15.3054  | 33.63801 | 1.136051 | Up | 0        | 0        |
| Pfdn2        | 868  | 1204   | 2825    | 49.49607 | 108.7595 | 1.135755 | Up | 9.08E-13 | 2.89E-12 |
| LOC100911762 | 653  | 555    | 1302.5  | 30.32695 | 66.6119  | 1.13518  | Up | 0        | 0        |
| Tgfb3        | 3931 | 81     | 190.5   | 0.738934 | 1.622879 | 1.135038 | Up | 2.08E-11 | 5.33E-11 |
| LOC100362027 | 480  | 6354.5 | 14922.5 | 472.4784 | 1037.298 | 1.13451  | Up | 3.12E-11 | 7.91E-11 |
| Rab5a        | 649  | 453.5  | 1068    | 25.03464 | 54.92221 | 1.133464 | Up | 1.56E-12 | 4.77E-12 |
| Commd6       | 909  | 436    | 1024    | 17.14317 | 37.60671 | 1.133356 | Up | 4.26E-13 | 1.45E-12 |
| Npap60       | 3027 | 2715.5 | 6385    | 32.12466 | 70.45953 | 1.133114 | Up | 0        | 0        |
| Sdcbp        | 2077 | 9797.5 | 22895.5 | 167.7646 | 367.8224 | 1.132571 | Up | 0        | 0        |
| Tbx19        | 2542 | 14.5   | 34      | 0.204678 | 0.448683 | 1.132343 | Up | 0.003802 | 0.00618  |
| Srp19        | 784  | 979    | 2291    | 44.55247 | 97.59373 | 1.131283 | Up | 0        | 0        |
| Kctd21       | 881  | 21     | 49      | 0.848393 | 1.85795  | 1.130908 | Up | 0.000767 | 0.001316 |
| LOC679110    | 693  | 29.5   | 69.5    | 1.520344 | 3.326887 | 1.129775 | Up | 4.61E-05 | 8.82E-05 |
| Mapk1ip1     | 1445 | 238    | 560     | 5.895296 | 12.8971  | 1.129411 | Up | 6.71E-13 | 2.18E-12 |
| LOC100911561 | 953  | 27.5   | 64      | 1.02926  | 2.251581 | 1.12933  | Up | 9.26E-05 | 0.000173 |
| LOC100365010 | 348  | 405    | 947     | 41.56848 | 90.91383 | 1.12901  | Up | 0        | 0        |
| Snmp27       | 873  | 755.5  | 1763    | 30.85571 | 67.45882 | 1.12847  | Up | 1.01E-12 | 3.19E-12 |
| RGD1562543   | 776  | 21     | 49.5    | 0.9691   | 2.118682 | 1.12845  | Up | 0.000767 | 0.001316 |
| RGD1309085   | 1074 | 244    | 570     | 8.115642 | 17.74105 | 1.128314 | Up | 2.85E-13 | 1.01E-12 |
| LOC100363310 | 1014 | 1103   | 2582    | 38.81596 | 84.84501 | 1.12818  | Up | 2.51E-12 | 7.39E-12 |
| LOC100359498 | 471  | 3814   | 8896.5  | 288.5833 | 630.5869 | 1.127707 | Up | 5.62E-12 | 1.52E-11 |
| Amacr        | 1542 | 562.5  | 1318.5  | 13.043   | 28.49952 | 1.127662 | Up | 3.62E-13 | 1.25E-12 |

|              |      |        |        |          |          |          |    |          |          |
|--------------|------|--------|--------|----------|----------|----------|----|----------|----------|
| Ces5a        | 2147 | 114    | 264.5  | 1.889845 | 4.128394 | 1.127313 | Up | 8.33E-14 | 3.25E-13 |
| Nanp         | 1335 | 255.5  | 597.5  | 6.831435 | 14.92222 | 1.127202 | Up | 0        | 0        |
| Dcp1b        | 1784 | 239.5  | 561    | 4.806591 | 10.49787 | 1.127011 | Up | 5.84E-13 | 1.93E-12 |
| LOC100365259 | 2702 | 1739.5 | 4058.5 | 22.96732 | 50.15767 | 1.126888 | Up | 6.82E-12 | 1.82E-11 |
| LOC100910723 | 1262 | 373    | 872.5  | 10.56937 | 23.08062 | 1.126793 | Up | 3.81E-13 | 1.31E-12 |
| Atxn7l3b     | 3525 | 2510.5 | 5856   | 25.39912 | 55.45732 | 1.1266   | Up | 0        | 0        |
| Ovca2        | 2935 | 330    | 772    | 4.020983 | 8.777212 | 1.126214 | Up | 2.96E-13 | 1.04E-12 |
| LOC100360654 | 294  | 78     | 182    | 9.4467   | 20.61904 | 1.126095 | Up | 6.76E-11 | 1.69E-10 |
| Atp7b        | 5506 | 62.5   | 145.5  | 0.406237 | 0.886602 | 1.125967 | Up | 5.42E-09 | 1.27E-08 |
| Arhgef6      | 2319 | 864    | 2024.5 | 13.34947 | 29.13271 | 1.125857 | Up | 0        | 0        |
| Usp32        | 6396 | 2051.5 | 4789.5 | 11.45564 | 24.99625 | 1.125654 | Up | 0        | 0        |
| Nuf2         | 1813 | 1742.5 | 4072   | 34.36315 | 74.97738 | 1.125593 | Up | 3.16E-13 | 1.11E-12 |
| Chordc1      | 2564 | 2976.5 | 6939   | 41.37783 | 90.24898 | 1.125052 | Up | 0        | 0        |
| LOC690728    | 2760 | 2295   | 5355.5 | 29.71091 | 64.79791 | 1.124955 | Up | 0        | 0        |
| Nr1f2        | 1759 | 283    | 662    | 5.760638 | 12.56155 | 1.124714 | Up | 0        | 0        |
| Dguok        | 997  | 76     | 177.5  | 2.721957 | 5.935415 | 1.124705 | Up | 1.33E-10 | 3.29E-10 |
| Ccdc51       | 1530 | 158    | 370    | 3.701259 | 8.070405 | 1.124625 | Up | 1.62E-14 | 6.66E-14 |
| RGD1560854   | 1299 | 239    | 557    | 6.579701 | 14.34369 | 1.124322 | Up | 5.84E-13 | 1.93E-12 |
| Zc3h15       | 2036 | 3580.5 | 8351.5 | 62.80219 | 136.9072 | 1.124312 | Up | 0        | 0        |
| LOC100360053 | 537  | 16.5   | 39     | 1.106426 | 2.411332 | 1.123924 | Up | 0.001842 | 0.003067 |
| Mplkip       | 1529 | 359    | 838.5  | 8.394187 | 18.27717 | 1.12258  | Up | 0        | 0        |
| Tada2a       | 2124 | 812    | 1892.5 | 13.6766  | 29.77438 | 1.122362 | Up | 1.63E-12 | 4.97E-12 |
| Prss46       | 750  | 65     | 151    | 3.087451 | 6.720678 | 1.122191 | Up | 3.28E-09 | 7.74E-09 |
| Mll5         | 7209 | 4109   | 9596   | 20.42555 | 44.44976 | 1.121801 | Up | 2.80E-11 | 7.12E-11 |
| LOC684112    | 6223 | 2574.5 | 6019.5 | 14.83129 | 32.27557 | 1.121799 | Up | 0        | 0        |

|              |      |        |        |          |          |          |    |          |          |
|--------------|------|--------|--------|----------|----------|----------|----|----------|----------|
| Tmem88       | 1567 | 79     | 183.5  | 1.795954 | 3.906528 | 1.121137 | Up | 8.05E-11 | 2.01E-10 |
| RGD1304868   | 1594 | 148.5  | 345    | 3.326258 | 7.234599 | 1.121013 | Up | 0        | 0        |
| Ccdc40       | 5157 | 14.5   | 34     | 0.10089  | 0.21942  | 1.120913 | Up | 0.003802 | 0.00618  |
| LOC687118    | 2256 | 191    | 447.5  | 3.038417 | 6.608044 | 1.120904 | Up | 8.66E-14 | 3.37E-13 |
| RGD1561636   | 213  | 75     | 174    | 12.52166 | 27.2188  | 1.120178 | Up | 2.21E-10 | 5.43E-10 |
| Tbkbp1       | 3340 | 70.5   | 164    | 0.754189 | 1.639083 | 1.119891 | Up | 5.08E-10 | 1.23E-09 |
| LOC367289    | 4758 | 1640.5 | 3817   | 12.33202 | 26.79896 | 1.119769 | Up | 2.90E-12 | 8.43E-12 |
| RGD1563296   | 2115 | 657    | 1527.5 | 11.09585 | 24.11206 | 1.119735 | Up | 0        | 0        |
| Pnpo         | 2076 | 162    | 378    | 2.788742 | 6.059592 | 1.119606 | Up | 0        | 0        |
| Hbp1         | 2671 | 1104   | 2571   | 14.77734 | 32.09741 | 1.11907  | Up | 4.36E-12 | 1.21E-11 |
| ST7          | 2098 | 826.5  | 1922.5 | 14.0878  | 30.58818 | 1.118528 | Up | 0        | 0        |
| Fbxo33       | 3320 | 620    | 1436.5 | 6.662721 | 14.45627 | 1.117512 | Up | 8.34E-13 | 2.67E-12 |
| Dbf4         | 2263 | 1303.5 | 3025   | 20.56534 | 44.60301 | 1.116926 | Up | 4.43E-12 | 1.23E-11 |
| Ttc23        | 1948 | 126.5  | 294    | 2.323264 | 5.037486 | 1.116551 | Up | 1.12E-13 | 4.31E-13 |
| Rps6kb2      | 1769 | 573    | 1335   | 11.62011 | 25.18259 | 1.115803 | Up | 7.09E-13 | 2.29E-12 |
| Rabl3        | 1961 | 347.5  | 805    | 6.324172 | 13.70407 | 1.115656 | Up | 1.58E-13 | 5.86E-13 |
| Cttnbp2nl    | 4791 | 3447   | 8000.5 | 25.73876 | 55.74923 | 1.115009 | Up | 0        | 0        |
| Exoc3l1      | 2511 | 55     | 128.5  | 0.785838 | 1.701216 | 1.114263 | Up | 4.92E-08 | 1.11E-07 |
| LOC100364116 | 398  | 567.5  | 1307   | 50.68039 | 109.7097 | 1.114192 | Up | 0        | 0        |
| Tipin        | 1208 | 989.5  | 2284.5 | 29.1777  | 63.16119 | 1.114172 | Up | 2.57E-12 | 7.53E-12 |
| Cyp2u1       | 2154 | 308    | 717    | 5.125688 | 11.09087 | 1.113555 | Up | 0        | 0        |
| LOC100364165 | 6860 | 2748   | 6362.5 | 14.30281 | 30.94684 | 1.113493 | Up | 0        | 0        |
| Bbs10        | 2667 | 143    | 331    | 1.913691 | 4.138895 | 1.112888 | Up | 0        | 0        |
| Slc25a16     | 3204 | 595.5  | 1376   | 6.623608 | 14.32436 | 1.112782 | Up | 1.07E-12 | 3.35E-12 |
| Cbr4         | 1187 | 139.5  | 322.5  | 4.199803 | 9.070595 | 1.110876 | Up | 1.77E-13 | 6.53E-13 |

|              |      |        |        |          |          |          |    |          |          |
|--------------|------|--------|--------|----------|----------|----------|----|----------|----------|
| Med10        | 860  | 852    | 1964   | 35.33768 | 76.30791 | 1.110625 | Up | 9.49E-13 | 3.01E-12 |
| Tctex1d2     | 883  | 147    | 340    | 5.961015 | 12.87091 | 1.110485 | Up | 1.02E-13 | 3.94E-13 |
| Serpinb10    | 1500 | 19     | 43.5   | 0.448285 | 0.967918 | 1.110469 | Up | 0.002228 | 0.00368  |
| Dr1          | 3035 | 1414   | 3268.5 | 16.63921 | 35.91972 | 1.110189 | Up | 0        | 0        |
| Pcca         | 2495 | 420    | 971    | 6.009381 | 12.97106 | 1.110008 | Up | 1.49E-13 | 5.55E-13 |
| Cdc7         | 2917 | 611    | 1408.5 | 7.478313 | 16.13825 | 1.109699 | Up | 4.93E-13 | 1.66E-12 |
| RGD1311564   | 2166 | 46     | 106    | 0.757557 | 1.634719 | 1.109617 | Up | 8.93E-07 | 1.90E-06 |
| LOC687575    | 935  | 3033   | 7007.5 | 115.9927 | 250.0324 | 1.108082 | Up | 0        | 0        |
| Hmha1        | 3891 | 54     | 124.5  | 0.49749  | 1.072323 | 1.107999 | Up | 1.16E-07 | 2.57E-07 |
| Cited1       | 873  | 68.5   | 158.5  | 2.805435 | 6.046689 | 1.107921 | Up | 1.41E-09 | 3.37E-09 |
| LOC100912905 | 1032 | 47.5   | 109.5  | 1.647277 | 3.549909 | 1.107699 | Up | 5.34E-07 | 1.15E-06 |
| Cacna1c      | 8257 | 70.5   | 164    | 0.308546 | 0.664762 | 1.107353 | Up | 5.08E-10 | 1.23E-09 |
| Ttc27        | 2821 | 1589.5 | 3659   | 20.11856 | 43.30941 | 1.106154 | Up | 3.80E-12 | 1.07E-11 |
| LOC100361445 | 171  | 124.5  | 283.5  | 25.78611 | 55.4913  | 1.105668 | Up | 1.29E-13 | 4.87E-13 |
| Exnef        | 2541 | 217    | 500.5  | 3.053386 | 6.570346 | 1.105559 | Up | 2.24E-13 | 8.07E-13 |
| Snap47       | 1822 | 242    | 555.5  | 4.730107 | 10.17394 | 1.104934 | Up | 3.84E-13 | 1.32E-12 |
| Gtf2h1       | 2632 | 2199.5 | 5065.5 | 29.87825 | 64.25651 | 1.104747 | Up | 0        | 0        |
| Tomm5        | 628  | 861.5  | 1977   | 48.85286 | 105.0316 | 1.104308 | Up | 1.12E-12 | 3.49E-12 |
| Fcho2        | 3051 | 695.5  | 1599   | 8.137999 | 17.4924  | 1.103982 | Up | 7.07E-13 | 2.29E-12 |
| Srp9         | 1328 | 1191   | 2737.5 | 31.96522 | 68.70568 | 1.103926 | Up | 3.02E-12 | 8.74E-12 |
| Rnf168       | 3311 | 691.5  | 1589.5 | 7.450875 | 16.01416 | 1.103866 | Up | 1.59E-12 | 4.83E-12 |
| Golph3       | 2530 | 2487   | 5718.5 | 35.07284 | 75.38143 | 1.103855 | Up | 0        | 0        |
| Crnk1        | 2311 | 422    | 972.5  | 6.53221  | 14.03774 | 1.103668 | Up | 4.13E-13 | 1.41E-12 |
| Ccdc53       | 1039 | 433    | 997.5  | 14.90648 | 32.02078 | 1.103069 | Up | 1.10E-12 | 3.43E-12 |
| LOC683722    | 1483 | 608.5  | 1396.5 | 14.6351  | 31.43124 | 1.102767 | Up | 1.66E-12 | 5.04E-12 |



|            |      |        |         |          |          |          |    |          |          |
|------------|------|--------|---------|----------|----------|----------|----|----------|----------|
| Armc8      | 4447 | 686.5  | 1574.5  | 5.510258 | 11.82808 | 1.102024 | Up | 0        | 0        |
| Stard6     | 1297 | 130.5  | 300     | 3.591773 | 7.709285 | 1.101901 | Up | 0        | 0        |
| Cdh6       | 3594 | 35.5   | 83.5    | 0.352893 | 0.757275 | 1.101586 | Up | 8.18E-06 | 1.65E-05 |
| Fam134c    | 3106 | 833.5  | 1911.5  | 9.575255 | 20.54248 | 1.101227 | Up | 9.78E-13 | 3.09E-12 |
| Slc25a42   | 2830 | 93     | 213.5   | 1.171863 | 2.51351  | 1.1009   | Up | 3.98E-12 | 1.12E-11 |
| Gbe1       | 2937 | 1014.5 | 2328    | 12.34435 | 26.47709 | 1.100893 | Up | 2.17E-12 | 6.44E-12 |
| LOC681224  | 1191 | 177.5  | 409.5   | 5.347619 | 11.4699  | 1.100884 | Up | 0        | 0        |
| Synj1      | 5970 | 1433   | 3290.5  | 8.582355 | 18.39051 | 1.099516 | Up | 4.69E-12 | 1.30E-11 |
| Ndufa4     | 890  | 3277.5 | 7509.5  | 131.5187 | 281.8086 | 1.099448 | Up | 0        | 0        |
| Tmem87a    | 2880 | 2037   | 4653.5  | 25.19469 | 53.95871 | 1.098736 | Up | 0        | 0        |
| Id2        | 725  | 1654.5 | 3807    | 81.76302 | 175.103  | 1.098683 | Up | 4.25E-12 | 1.19E-11 |
| Tmem60     | 1370 | 438.5  | 1006.5  | 11.45053 | 24.5129  | 1.098127 | Up | 7.26E-13 | 2.34E-12 |
| Stx3       | 1054 | 16.5   | 38      | 0.559358 | 1.196868 | 1.09742  | Up | 0.002667 | 0.004372 |
| Rab28      | 1483 | 1866.5 | 4268.5  | 44.91701 | 96.10867 | 1.097405 | Up | 5.21E-12 | 1.42E-11 |
| LOC362695  | 1020 | 282    | 641.5   | 9.821051 | 21.0096  | 1.097099 | Up | 6.96E-13 | 2.25E-12 |
| Mttr14     | 2656 | 446    | 1021    | 6.009213 | 12.8516  | 1.0967   | Up | 0        | 0        |
| Vdr        | 2043 | 56     | 129     | 0.985333 | 2.105922 | 1.095768 | Up | 5.86E-08 | 1.32E-07 |
| Akap3      | 2889 | 14.5   | 33.5    | 0.180292 | 0.385119 | 1.094967 | Up | 0.005515 | 0.00883  |
| Vapa       | 1618 | 5927.5 | 13538.5 | 130.697  | 279.1601 | 1.094867 | Up | 1.85E-11 | 4.78E-11 |
| LOC679140  | 1033 | 600.5  | 1370    | 20.74338 | 44.25957 | 1.093339 | Up | 0        | 0        |
| Pspc1      | 2034 | 1089.5 | 2493    | 19.14974 | 40.85861 | 1.093316 | Up | 3.07E-12 | 8.87E-12 |
| Glipr1     | 1072 | 80     | 183.5   | 2.670925 | 5.69443  | 1.092212 | Up | 1.34E-10 | 3.32E-10 |
| LOC64038   | 853  | 66     | 150.5   | 2.759279 | 5.882726 | 1.092193 | Up | 7.68E-09 | 1.79E-08 |
| RGD1563956 | 603  | 99.5   | 225.5   | 5.847947 | 12.46679 | 1.092088 | Up | 1.46E-12 | 4.47E-12 |
| Insig2     | 720  | 259    | 588.5   | 12.79636 | 27.27846 | 1.092028 | Up | 1.39E-13 | 5.21E-13 |

|              |      |        |        |          |          |          |    |          |          |
|--------------|------|--------|--------|----------|----------|----------|----|----------|----------|
| Adnp2        | 4263 | 1292.5 | 2957.5 | 10.85915 | 23.14629 | 1.09187  | Up | 5.07E-12 | 1.39E-11 |
| LOC685233    | 7054 | 1903   | 4351.5 | 9.659311 | 20.58743 | 1.091772 | Up | 4.21E-12 | 1.18E-11 |
| Pkdcc        | 1855 | 47.5   | 108.5  | 0.916746 | 1.952571 | 1.090781 | Up | 7.53E-07 | 1.61E-06 |
| LOC100912007 | 339  | 62     | 141.5  | 6.520744 | 13.88668 | 1.090593 | Up | 2.12E-08 | 4.86E-08 |
| Jmjd6        | 1730 | 1202   | 2745   | 24.86708 | 52.9563  | 1.090565 | Up | 5.72E-12 | 1.54E-11 |
| Tmem41a      | 1444 | 261    | 595    | 6.450272 | 13.73397 | 1.090317 | Up | 2.23E-13 | 8.05E-13 |
| Cox7a2l2     | 449  | 1119.5 | 2542.5 | 88.89907 | 189.2811 | 1.09029  | Up | 5.35E-12 | 1.46E-11 |
| Tmem171      | 1103 | 42     | 96     | 1.359953 | 2.894409 | 1.089712 | Up | 3.51E-06 | 7.25E-06 |
| Zscan30      | 1673 | 142.5  | 323.5  | 3.040858 | 6.471718 | 1.08967  | Up | 2.91E-13 | 1.03E-12 |
| Cox17        | 440  | 529.5  | 1204   | 42.92828 | 91.30323 | 1.088737 | Up | 0        | 0        |
| LOC100909597 | 998  | 112.5  | 256.5  | 4.042013 | 8.596661 | 1.088703 | Up | 0        | 0        |
| LOC500684    | 2686 | 74     | 168.5  | 0.98541  | 2.095617 | 1.088579 | Up | 1.01E-09 | 2.43E-09 |
| Nsmaf        | 2787 | 742    | 1690.5 | 9.523496 | 20.24921 | 1.088303 | Up | 4.00E-13 | 1.37E-12 |
| Sfn2         | 2078 | 1111   | 2530   | 19.11269 | 40.62952 | 1.087997 | Up | 5.50E-12 | 1.50E-11 |
| Rup2         | 569  | 14.5   | 33     | 0.910363 | 1.934736 | 1.087622 | Up | 0.005515 | 0.008831 |
| Coq4         | 1257 | 128.5  | 292    | 3.648679 | 7.752147 | 1.087222 | Up | 3.73E-14 | 1.50E-13 |
| Ilgax        | 3623 | 40     | 91     | 0.395384 | 0.839829 | 1.086841 | Up | 6.97E-06 | 1.42E-05 |
| Rps29        | 318  | 3750   | 8479.5 | 418.7515 | 889.2959 | 1.086569 | Up | 5.56E-12 | 1.51E-11 |
| Gphn         | 3220 | 450    | 1023   | 4.995776 | 10.60454 | 1.085901 | Up | 1.46E-12 | 4.47E-12 |
| Csnk1g3      | 4344 | 1812   | 4109   | 14.87533 | 31.57031 | 1.085646 | Up | 3.37E-12 | 9.65E-12 |
| Golga7       | 2012 | 3007   | 6835.5 | 53.40711 | 113.3384 | 1.085533 | Up | 0        | 0        |
| Chmp5        | 1355 | 2709   | 6140.5 | 71.23155 | 151.1344 | 1.085244 | Up | 0        | 0        |
| LOC100909715 | 810  | 107    | 243    | 4.728337 | 10.03049 | 1.084987 | Up | 1.22E-13 | 4.64E-13 |
| LOC680017    | 3850 | 2453   | 5551   | 22.68375 | 48.1134  | 1.08478  | Up | 0        | 0        |
| Arl6         | 1005 | 337    | 762.5  | 11.94589 | 25.33034 | 1.084352 | Up | 0        | 0        |

|              |      |        |        |          |          |          |    |          |          |
|--------------|------|--------|--------|----------|----------|----------|----|----------|----------|
| RGD1562420   | 877  | 867    | 1942.5 | 34.87893 | 73.94508 | 1.084098 | Up | 0        | 0        |
| LOC684441    | 525  | 633.5  | 1439   | 43.12    | 91.41223 | 1.08403  | Up | 0        | 0        |
| RGD1311745   | 808  | 435.5  | 989.5  | 19.25718 | 40.80012 | 1.083177 | Up | 1.31E-12 | 4.03E-12 |
| Tbpl1        | 1270 | 602.5  | 1366   | 16.91156 | 35.8255  | 1.082977 | Up | 7.49E-13 | 2.41E-12 |
| Arglu1       | 1742 | 1592.5 | 3606.5 | 32.59987 | 69.05814 | 1.082945 | Up | 4.26E-12 | 1.19E-11 |
| Atxn3        | 3071 | 423    | 958    | 4.918145 | 10.41122 | 1.081953 | Up | 1.33E-13 | 5.02E-13 |
| LOC689153    | 1854 | 28.5   | 65     | 0.553004 | 1.170519 | 1.081786 | Up | 0.000111 | 0.000207 |
| Dync2li1     | 1689 | 432.5  | 980    | 9.144801 | 19.35428 | 1.081629 | Up | 9.58E-13 | 3.03E-12 |
| Ccnk         | 2552 | 1645.5 | 3742   | 23.13205 | 48.94735 | 1.081338 | Up | 5.18E-12 | 1.42E-11 |
| Ppfibp2      | 3389 | 1836.5 | 4160   | 19.39678 | 40.97092 | 1.078783 | Up | 8.68E-12 | 2.29E-11 |
| Det1         | 1873 | 277.5  | 628.5  | 5.300502 | 11.19432 | 1.078566 | Up | 6.93E-14 | 2.73E-13 |
| Cep152       | 5396 | 465    | 1050   | 3.075329 | 6.49369  | 1.078298 | Up | 0        | 0        |
| Akap8l       | 2194 | 537    | 1215   | 8.756941 | 18.48618 | 1.077948 | Up | 6.73E-14 | 2.65E-13 |
| LOC100911576 | 1707 | 7465   | 16841  | 156.12   | 329.5115 | 1.077674 | Up | 0        | 0        |
| Chrm3        | 3578 | 82     | 185.5  | 0.818792 | 1.727782 | 1.077352 | Up | 1.87E-10 | 4.60E-10 |
| RGD1560402   | 1218 | 49     | 111.5  | 1.431552 | 3.019768 | 1.076858 | Up | 7.52E-07 | 1.61E-06 |
| Eml4         | 4837 | 593    | 1337.5 | 4.377776 | 9.233887 | 1.07674  | Up | 1.48E-12 | 4.54E-12 |
| LOC100909856 | 2558 | 299.5  | 677.5  | 4.196918 | 8.849185 | 1.076215 | Up | 6.08E-13 | 2.00E-12 |
| Pdgfc        | 1116 | 2015.5 | 4553   | 64.66807 | 136.3421 | 1.076106 | Up | 0        | 0        |
| Mtmr10       | 4644 | 2818   | 6351.5 | 21.67107 | 45.68637 | 1.075993 | Up | 0        | 0        |
| RGD1309492   | 3986 | 697    | 1575.5 | 6.253676 | 13.1805  | 1.075629 | Up | 0        | 0        |
| RGD1311558   | 3581 | 94     | 209.5  | 0.927768 | 1.955372 | 1.075607 | Up | 2.43E-11 | 6.20E-11 |
| Zfp426l2     | 2627 | 171.5  | 387.5  | 2.337913 | 4.926662 | 1.075389 | Up | 3.66E-13 | 1.27E-12 |
| RGD1563702   | 1626 | 71     | 160    | 1.560727 | 3.288616 | 1.075262 | Up | 3.28E-09 | 7.75E-09 |
| Evi2a        | 1410 | 302    | 682    | 7.65323  | 16.12263 | 1.074946 | Up | 5.71E-13 | 1.89E-12 |

|              |      |        |        |          |          |          |    |          |          |
|--------------|------|--------|--------|----------|----------|----------|----|----------|----------|
| Rfesd        | 771  | 196    | 442    | 9.095158 | 19.15989 | 1.074918 | Up | 1.28E-13 | 4.85E-13 |
| Slc27a5      | 2359 | 26.5   | 59     | 0.397233 | 0.83655  | 1.074465 | Up | 0.000317 | 0.000568 |
| LOC100363502 | 1197 | 3069.5 | 6899.5 | 91.42483 | 192.4493 | 1.07382  | Up | 0        | 0        |
| Mrps31       | 1361 | 652    | 1471.5 | 17.14567 | 36.08328 | 1.073486 | Up | 1.68E-12 | 5.10E-12 |
| Cyp4v3       | 3216 | 909.5  | 2045.5 | 10.10478 | 21.25111 | 1.072501 | Up | 2.43E-12 | 7.16E-12 |
| Klf11        | 3825 | 297.5  | 669.5  | 2.779917 | 5.846019 | 1.072413 | Up | 3.95E-13 | 1.35E-12 |
| Clec2d2      | 702  | 52.5   | 118    | 2.669153 | 5.612028 | 1.07214  | Up | 3.21E-07 | 6.99E-07 |
| Gemin2       | 1350 | 270.5  | 606    | 7.120414 | 14.96897 | 1.071942 | Up | 4.53E-13 | 1.53E-12 |
| LOC100910202 | 3255 | 677.5  | 1523   | 7.436606 | 15.62707 | 1.071331 | Up | 5.28E-13 | 1.76E-12 |
| Shfm1        | 753  | 3042.5 | 6835   | 144.0405 | 302.6621 | 1.071234 | Up | 0        | 0        |
| LOC689656    | 1205 | 135    | 303.5  | 4.005579 | 8.413898 | 1.070764 | Up | 2.15E-13 | 7.78E-13 |
| E2f3         | 2020 | 491.5  | 1105.5 | 8.694314 | 18.25513 | 1.070158 | Up | 5.39E-13 | 1.79E-12 |
| Glmn         | 354  | 557.5  | 1248.5 | 56.06925 | 117.7079 | 1.069929 | Up | 5.01E-13 | 1.68E-12 |
| LOC100360754 | 436  | 23     | 52     | 1.886332 | 3.957142 | 1.068875 | Up | 0.000765 | 0.001312 |
| Nip7         | 1175 | 700.5  | 1571   | 21.26726 | 44.59675 | 1.068305 | Up | 0        | 0        |
| Snrpe        | 296  | 2573   | 5778.5 | 310.9881 | 652.042  | 1.068106 | Up | 0        | 0        |
| LOC100362083 | 3570 | 104    | 234    | 1.042425 | 2.185606 | 1.06809  | Up | 7.64E-13 | 2.45E-12 |
| Myh11        | 6555 | 164.5  | 369    | 0.896987 | 1.880127 | 1.067672 | Up | 1.50E-13 | 5.56E-13 |
| RGD1563446   | 1002 | 40     | 90     | 1.427328 | 2.99163  | 1.067615 | Up | 9.80E-06 | 1.96E-05 |
| Gpatch1      | 3073 | 398.5  | 895    | 4.637213 | 9.716465 | 1.067173 | Up | 5.90E-13 | 1.95E-12 |
| Zfp386       | 1907 | 428    | 958    | 7.989259 | 16.73915 | 1.067093 | Up | 2.52E-13 | 9.05E-13 |
| RGD1311463   | 1347 | 552    | 1238   | 14.64692 | 30.68714 | 1.067036 | Up | 0        | 0        |
| Gpr182       | 1908 | 16     | 36     | 0.30067  | 0.62994  | 1.067033 | Up | 0.005486 | 0.008786 |
| Dclre1c      | 2162 | 343.5  | 770.5  | 5.675318 | 11.89037 | 1.067021 | Up | 0        | 0        |
| LOC100912076 | 1208 | 21     | 47     | 0.619686 | 1.298245 | 1.066953 | Up | 0.00155  | 0.002598 |

|              |      |        |        |          |          |          |    |          |          |
|--------------|------|--------|--------|----------|----------|----------|----|----------|----------|
| LOC100910638 | 1729 | 318.5  | 713    | 6.5749   | 13.76483 | 1.065946 | Up | 1.88E-13 | 6.87E-13 |
| LOC691807    | 1163 | 2330.5 | 5201   | 71.40834 | 149.3301 | 1.06434  | Up | 0        | 0        |
| LOC687029    | 671  | 428    | 959.5  | 22.80738 | 47.68867 | 1.064145 | Up | 2.52E-13 | 9.04E-13 |
| Txn1         | 330  | 4185   | 9291.5 | 449.8971 | 940.3997 | 1.063679 | Up | 2.70E-11 | 6.86E-11 |
| Npas2        | 4273 | 797.5  | 1792   | 6.692634 | 13.9882  | 1.063564 | Up | 4.88E-13 | 1.64E-12 |
| Bcap29       | 1767 | 1853.5 | 4129.5 | 37.31734 | 77.99099 | 1.063462 | Up | 5.00E-12 | 1.37E-11 |
| Nmnat3       | 1854 | 46     | 103.5  | 0.887826 | 1.855331 | 1.063329 | Up | 2.47E-06 | 5.15E-06 |
| Pawr         | 2122 | 347.5  | 778.5  | 5.862181 | 12.24844 | 1.063088 | Up | 1.58E-13 | 5.86E-13 |
| Hdgfrp3      | 2750 | 1080.5 | 2405.5 | 13.98981 | 29.22514 | 1.062834 | Up | 5.71E-12 | 1.54E-11 |
| Gls          | 4219 | 1790   | 3974   | 15.07306 | 31.44802 | 1.060997 | Up | 4.89E-12 | 1.34E-11 |
| Mocs3        | 1961 | 127.5  | 284.5  | 2.32728  | 4.854971 | 1.060818 | Up | 9.61E-14 | 3.72E-13 |
| Bax          | 865  | 2014.5 | 4507.5 | 83.37707 | 173.9203 | 1.060704 | Up | 0        | 0        |
| Rpe          | 2119 | 1232   | 2748.5 | 20.75399 | 43.28499 | 1.060478 | Up | 3.75E-12 | 1.06E-11 |
| Rg9mtd3      | 1301 | 299.5  | 668    | 8.22016  | 17.13489 | 1.059698 | Up | 6.08E-13 | 2.00E-12 |
| Lin52        | 2353 | 402.5  | 896.5  | 6.108222 | 12.73252 | 1.059694 | Up | 1.18E-14 | 4.87E-14 |
| Coq10a       | 1287 | 130    | 291    | 3.618924 | 7.542705 | 1.059521 | Up | 0        | 0        |
| Sec61g       | 443  | 2338   | 5188   | 187.4302 | 390.6354 | 1.059469 | Up | 0        | 0        |
| Olig2        | 2650 | 31     | 69.5   | 0.420544 | 0.876465 | 1.059441 | Up | 0.000131 | 0.00024  |
| LOC687970    | 1191 | 19     | 42.5   | 0.570368 | 1.187984 | 1.058551 | Up | 0.003156 | 0.005151 |
| Proca1       | 1444 | 47     | 104.5  | 1.163498 | 2.420826 | 1.05703  | Up | 2.90E-06 | 6.02E-06 |
| Larp6        | 2336 | 147.5  | 329.5  | 2.262989 | 4.708349 | 1.056992 | Up | 1.02E-13 | 3.94E-13 |
| Glrx3        | 1245 | 4547   | 10140  | 130.6367 | 271.7986 | 1.056978 | Up | 1.32E-11 | 3.43E-11 |
| LOC689229    | 3079 | 301    | 670    | 3.489008 | 7.258936 | 1.056941 | Up | 0        | 0        |
| RGD1566320   | 646  | 244    | 538.5  | 13.36474 | 27.80379 | 1.056849 | Up | 2.85E-13 | 1.01E-12 |
| LOC100910121 | 1904 | 862.5  | 1920   | 16.18112 | 33.64137 | 1.055925 | Up | 0        | 0        |

|              |      |        |          |          |          |          |    |          |          |
|--------------|------|--------|----------|----------|----------|----------|----|----------|----------|
| Rbm22        | 1725 | 1892   | 4223     | 39.31063 | 81.71652 | 1.055709 | Up | 5.43E-12 | 1.48E-11 |
| St3gal3      | 1207 | 356.5  | 796.5    | 10.59532 | 22.0234  | 1.05561  | Up | 6.28E-13 | 2.06E-12 |
| Hoxc8        | 1228 | 22.5   | 50.5     | 0.656338 | 1.36383  | 1.055154 | Up | 0.000914 | 0.001559 |
| Wbp5         | 1043 | 3010.5 | 6676     | 102.8397 | 213.6546 | 1.054883 | Up | 0        | 0        |
| RGD1308165   | 1625 | 306    | 682      | 6.740375 | 14.00222 | 1.054755 | Up | 0        | 0        |
| Atp5j        | 573  | 2256   | 4996.5   | 140.2083 | 291.245  | 1.054662 | Up | 0        | 0        |
| Atf2         | 1852 | 1260.5 | 2813     | 24.39472 | 50.67327 | 1.054656 | Up | 2.88E-12 | 8.37E-12 |
| Tma7         | 528  | 475    | 1055.5   | 32.12728 | 66.72752 | 1.054483 | Up | 1.22E-12 | 3.79E-12 |
| Top1         | 2304 | 2140   | 4761.5   | 33.20729 | 68.95011 | 1.054053 | Up | 0        | 0        |
| Ctgf         | 2349 | 47404  | 105482.5 | 721.6349 | 1498.173 | 1.053863 | Up | 1.44E-10 | 3.55E-10 |
| Zcchc6       | 5688 | 1493   | 3318     | 9.379868 | 19.46805 | 1.053469 | Up | 5.68E-12 | 1.54E-11 |
| LOC100362458 | 5870 | 2146.5 | 4771     | 13.07817 | 27.12836 | 1.052641 | Up | 0        | 0        |
| Ppp2r2d      | 1734 | 1413   | 3138.5   | 29.10807 | 60.37823 | 1.052609 | Up | 4.61E-12 | 1.28E-11 |
| Rad52        | 1864 | 100    | 221.5    | 1.915394 | 3.971475 | 1.052033 | Up | 8.81E-12 | 2.33E-11 |
| RGD1563842   | 1948 | 18     | 40       | 0.330646 | 0.685561 | 1.051998 | Up | 0.003794 | 0.006168 |
| Slu7         | 2256 | 1551.5 | 3453     | 24.64131 | 51.07981 | 1.051674 | Up | 2.30E-12 | 6.80E-12 |
| Sox9         | 2652 | 1032   | 2298     | 13.96275 | 28.93801 | 1.051382 | Up | 1.69E-12 | 5.13E-12 |
| LOC100912749 | 574  | 126.5  | 277.5    | 7.8106   | 16.18239 | 1.050919 | Up | 1.41E-13 | 5.30E-13 |
| LOC691069    | 7134 | 252    | 561      | 1.263598 | 2.617381 | 1.050587 | Up | 1.17E-13 | 4.46E-13 |
| Stap2        | 1439 | 747    | 1658.5   | 18.58143 | 38.48546 | 1.050452 | Up | 0        | 0        |
| RGD1563666   | 4050 | 65     | 143.5    | 0.572175 | 1.185076 | 1.050451 | Up | 4.78E-08 | 1.08E-07 |
| Rad1         | 1321 | 302.5  | 667      | 8.154831 | 16.87949 | 1.049544 | Up | 5.71E-13 | 1.89E-12 |
| Rhob         | 2183 | 8069.5 | 17913.5  | 132.2073 | 273.6255 | 1.049401 | Up | 0        | 0        |
| LOC100909561 | 1303 | 34.5   | 77.5     | 0.945025 | 1.955738 | 1.049289 | Up | 3.91E-05 | 7.56E-05 |
| Thumpd3      | 2002 | 1325.5 | 2939.5   | 23.68463 | 48.99854 | 1.048788 | Up | 2.55E-12 | 7.48E-12 |

|              |      |        |         |          |          |          |    |          |          |
|--------------|------|--------|---------|----------|----------|----------|----|----------|----------|
| Psmid10      | 696  | 292.5  | 646     | 14.9999  | 31.01549 | 1.048036 | Up | 0        | 0        |
| Bcar3        | 3337 | 1987   | 4408    | 21.31898 | 44.05393 | 1.047133 | Up | 0        | 0        |
| Prim2        | 2141 | 1100   | 2436    | 18.3868  | 37.98957 | 1.046933 | Up | 3.55E-12 | 1.01E-11 |
| Cldn1        | 3275 | 24.5   | 54      | 0.265853 | 0.549126 | 1.046509 | Up | 0.000639 | 0.001104 |
| Ppp1r12a     | 3300 | 3024   | 6687.5  | 32.76213 | 67.64129 | 1.045875 | Up | 0        | 0        |
| RGD1306487   | 2816 | 2571   | 5673    | 32.592   | 67.2837  | 1.045739 | Up | 0        | 0        |
| Rc3h2        | 3930 | 1346.5 | 2975    | 12.24556 | 25.27121 | 1.045236 | Up | 3.49E-12 | 9.95E-12 |
| Cks1bp6      | 735  | 681    | 1504.5  | 33.05674 | 68.21892 | 1.045228 | Up | 1.16E-13 | 4.45E-13 |
| Pard6g       | 1149 | 130    | 287.5   | 4.050578 | 8.348092 | 1.043319 | Up | 0        | 0        |
| Srsf10       | 1218 | 1732.5 | 3821.5  | 50.81076 | 104.7108 | 1.043204 | Up | 7.47E-12 | 1.99E-11 |
| LOC100910207 | 2608 | 1025.5 | 2259    | 14.02284 | 28.89693 | 1.043138 | Up | 2.27E-13 | 8.17E-13 |
| Rnf4         | 1040 | 1323   | 2906    | 45.28496 | 93.27834 | 1.04251  | Up | 6.80E-12 | 1.82E-11 |
| Mmd          | 2671 | 2970.5 | 6544.5  | 39.70556 | 81.76767 | 1.04219  | Up | 0        | 0        |
| Odc1         | 2506 | 7928.5 | 17448.5 | 113.0015 | 232.5674 | 1.041307 | Up | 1.92E-11 | 4.96E-11 |
| Cdca5        | 1508 | 389    | 861.5   | 9.259075 | 19.05404 | 1.041157 | Up | 0        | 0        |
| LOC100365214 | 294  | 116.5  | 254.5   | 14.09847 | 29.00066 | 1.040548 | Up | 5.13E-13 | 1.72E-12 |
| Wfdc6a       | 752  | 60     | 132     | 2.849707 | 5.861648 | 1.040493 | Up | 1.57E-07 | 3.48E-07 |
| Kcnip4       | 1289 | 102    | 225     | 2.831122 | 5.820118 | 1.039674 | Up | 6.07E-12 | 1.63E-11 |
| Coq3         | 1058 | 444.5  | 977.5   | 15.01499 | 30.8631  | 1.039479 | Up | 1.07E-12 | 3.36E-12 |
| Elmo3        | 2469 | 65     | 143.5   | 0.941116 | 1.93445  | 1.039478 | Up | 4.78E-08 | 1.08E-07 |
| RGD1307325   | 2069 | 430    | 946.5   | 7.421581 | 15.25489 | 1.039473 | Up | 7.47E-13 | 2.40E-12 |
| Mysm1        | 2560 | 687.5  | 1509.5  | 9.583211 | 19.69756 | 1.039436 | Up | 0        | 0        |
| Ager         | 1443 | 59     | 130     | 1.462673 | 3.005326 | 1.038914 | Up | 1.87E-07 | 4.13E-07 |
| Hdac2        | 2195 | 3277.5 | 7181    | 53.17652 | 109.1947 | 1.038041 | Up | 0        | 0        |
| Mpv17l       | 1542 | 456.5  | 1003    | 10.58802 | 21.74168 | 1.03803  | Up | 1.95E-12 | 5.83E-12 |

|              |       |         |        |          |          |          |    |          |          |
|--------------|-------|---------|--------|----------|----------|----------|----|----------|----------|
| RGD1309148   | 872   | 186.5   | 409    | 7.642329 | 15.68338 | 1.037152 | Up | 6.10E-13 | 2.00E-12 |
| Rnf19b       | 1331  | 915     | 2014   | 24.62816 | 50.54083 | 1.037141 | Up | 0        | 0        |
| Mmaa         | 3295  | 62.5    | 137    | 0.678828 | 1.391986 | 1.036026 | Up | 8.03E-08 | 1.79E-07 |
| Ttpal        | 4643  | 1743    | 3822   | 13.39661 | 27.47    | 1.035989 | Up | 2.81E-12 | 8.17E-12 |
| Anxa1        | 1401  | 14852.5 | 32530  | 377.9843 | 774.8388 | 1.03557  | Up | 0        | 0        |
| Nrip1        | 7910  | 363     | 793.5  | 1.635904 | 3.353273 | 1.035482 | Up | 0        | 0        |
| Kcnj6        | 16380 | 41.5    | 91.5   | 0.091062 | 0.186584 | 1.0349   | Up | 1.15E-05 | 2.30E-05 |
| Cnih4        | 1665  | 1305.5  | 2862   | 28.02417 | 57.39355 | 1.034217 | Up | 7.23E-12 | 1.93E-11 |
| Gabarapl1    | 1719  | 890.5   | 1955   | 18.55343 | 37.98355 | 1.033688 | Up | 5.11E-15 | 2.14E-14 |
| Rheb         | 1088  | 2171.5  | 4759.5 | 71.28697 | 145.9333 | 1.033598 | Up | 0        | 0        |
| Heatr7b1     | 5064  | 128.5   | 281.5  | 0.907384 | 1.856722 | 1.032973 | Up | 5.75E-14 | 2.28E-13 |
| Tbp          | 1923  | 656.5   | 1440   | 12.22109 | 25.00713 | 1.032967 | Up | 1.14E-12 | 3.56E-12 |
| LOC100363434 | 363   | 3169    | 6906.5 | 310.3634 | 634.8029 | 1.03235  | Up | 0        | 0        |
| Med17        | 4181  | 656.5   | 1438   | 5.61038  | 11.47219 | 1.031971 | Up | 1.14E-12 | 3.56E-12 |
| LOC100909827 | 3011  | 28      | 61     | 0.330852 | 0.676086 | 1.03102  | Up | 0.000438 | 0.000778 |
| LOC100361876 | 171   | 33.5    | 72.5   | 6.938067 | 14.17365 | 1.030606 | Up | 0.000128 | 0.000235 |
| Cdc5l        | 2847  | 3144    | 6872   | 39.46096 | 80.61365 | 1.030598 | Up | 0        | 0        |
| LOC100911867 | 1934  | 34      | 74.5   | 0.627888 | 1.28261  | 1.030502 | Up | 0.000107 | 0.0002   |
| LOC690734    | 944   | 53      | 115.5  | 1.995652 | 4.073969 | 1.029574 | Up | 1.41E-06 | 2.99E-06 |
| Wdr44        | 4020  | 541.5   | 1180   | 4.806575 | 9.804587 | 1.028448 | Up | 0        | 0        |
| Rc3h1        | 3195  | 970     | 2119   | 10.85569 | 22.14067 | 1.028248 | Up | 0        | 0        |
| mrpl11       | 812   | 486     | 1059.5 | 21.35562 | 43.55157 | 1.028109 | Up | 1.59E-13 | 5.89E-13 |
| Smg8         | 3215  | 656.5   | 1432   | 7.300393 | 14.88769 | 1.028074 | Up | 1.14E-12 | 3.56E-12 |
| Upf3b        | 2350  | 876.5   | 1913.5 | 13.3304  | 27.17984 | 1.027816 | Up | 1.50E-12 | 4.58E-12 |
| Cnot2        | 1810  | 1423.5  | 3119   | 28.18737 | 57.46567 | 1.027651 | Up | 4.31E-12 | 1.20E-11 |



|              |       |        |         |          |          |          |    |          |          |
|--------------|-------|--------|---------|----------|----------|----------|----|----------|----------|
| Slirp        | 2827  | 1079.5 | 2360.5  | 13.67826 | 27.87348 | 1.027009 | Up | 2.91E-12 | 8.45E-12 |
| Hiat1        | 2727  | 1513   | 3294.5  | 19.77595 | 40.28573 | 1.026522 | Up | 2.80E-13 | 9.96E-13 |
| LOC100361008 | 441   | 70.5   | 153     | 5.665186 | 11.53828 | 1.026233 | Up | 2.02E-08 | 4.63E-08 |
| LOC689665    | 594   | 18     | 39      | 1.078548 | 2.196609 | 1.026188 | Up | 0.005355 | 0.008583 |
| Cycs         | 1228  | 2274   | 4943    | 65.98337 | 134.3512 | 1.025835 | Up | 0        | 0        |
| Rbm28        | 3631  | 1581   | 3451.5  | 15.58143 | 31.7238  | 1.025738 | Up | 5.17E-12 | 1.41E-11 |
| MGC95208     | 1371  | 351.5  | 766.5   | 9.159754 | 18.64525 | 1.025428 | Up | 9.48E-14 | 3.68E-13 |
| Dll1         | 3171  | 200    | 437.5   | 2.262692 | 4.605071 | 1.025183 | Up | 0        | 0        |
| Rimbp2       | 6862  | 2506.5 | 5470.5  | 13.07886 | 26.60858 | 1.024655 | Up | 0        | 0        |
| Nhs          | 5813  | 886    | 1935.5  | 5.45634  | 11.09938 | 1.024474 | Up | 0        | 0        |
| Arhgap30     | 3672  | 66     | 143.5   | 0.640976 | 1.303883 | 1.024471 | Up | 7.70E-08 | 1.72E-07 |
| RGD1559962   | 630   | 404.5  | 882.5   | 23.0056  | 46.79303 | 1.024309 | Up | 2.91E-13 | 1.03E-12 |
| Nr1h4        | 2070  | 178    | 392.5   | 3.10887  | 6.322982 | 1.024215 | Up | 1.14E-13 | 4.36E-13 |
| Ryr3         | 15122 | 38     | 83      | 0.089692 | 0.182357 | 1.023716 | Up | 3.79E-05 | 7.34E-05 |
| LOC684988    | 528   | 7116   | 15431   | 479.5822 | 975.0536 | 1.023703 | Up | 1.68E-11 | 4.34E-11 |
| RGD1561431   | 2555  | 64.5   | 141     | 0.904568 | 1.838607 | 1.023311 | Up | 5.69E-08 | 1.28E-07 |
| Gpx8         | 1062  | 5954.5 | 12938.5 | 200.2177 | 406.6475 | 1.022209 | Up | 3.14E-11 | 7.95E-11 |
| Dctn3        | 956   | 869    | 1884.5  | 32.39065 | 65.78546 | 1.022191 | Up | 1.49E-13 | 5.54E-13 |
| LOC100365062 | 1496  | 1859.5 | 4051    | 44.46275 | 90.30065 | 1.022139 | Up | 5.01E-12 | 1.37E-11 |
| RGD1304879   | 1627  | 86     | 187     | 1.888611 | 3.834563 | 1.021736 | Up | 6.72E-10 | 1.62E-09 |
| C1galt1c1    | 1356  | 814    | 1761.5  | 21.3752  | 43.38114 | 1.02113  | Up | 0        | 0        |
| LOC100910706 | 1269  | 145    | 313.5   | 4.070631 | 8.261163 | 1.021092 | Up | 5.55E-15 | 2.32E-14 |
| Klh11        | 2441  | 859    | 1862.5  | 12.5681  | 25.50368 | 1.020939 | Up | 0        | 0        |
| LOC100912665 | 1267  | 334.5  | 723.5   | 9.400722 | 19.07033 | 1.020486 | Up | 3.40E-13 | 1.18E-12 |
| LOC100909481 | 1341  | 812.5  | 1770    | 21.66898 | 43.95351 | 1.020347 | Up | 1.63E-12 | 4.97E-12 |

|              |      |        |        |          |          |          |    |          |          |
|--------------|------|--------|--------|----------|----------|----------|----|----------|----------|
| Spag1        | 3681 | 68     | 147.5  | 0.661655 | 1.341376 | 1.019562 | Up | 5.45E-08 | 1.23E-07 |
| Plscr1       | 1569 | 457    | 990    | 10.38707 | 21.05764 | 1.019555 | Up | 1.73E-12 | 5.23E-12 |
| Rbx1         | 1549 | 2323   | 5031   | 53.46598 | 108.3767 | 1.019361 | Up | 0        | 0        |
| Derl3        | 1357 | 26.5   | 57     | 0.695196 | 1.408363 | 1.018527 | Up | 0.000628 | 0.001084 |
| RGD1305158   | 660  | 132.5  | 288    | 7.166813 | 14.51015 | 1.017659 | Up | 1.29E-13 | 4.86E-13 |
| Tgif2        | 714  | 23     | 50     | 1.156697 | 2.341794 | 1.017603 | Up | 0.001516 | 0.002543 |
| LOC691979    | 2039 | 1266.5 | 2740.5 | 22.14125 | 44.8183  | 1.017351 | Up | 4.30E-12 | 1.20E-11 |
| LOC100359951 | 395  | 1393.5 | 3002   | 125.353  | 253.6304 | 1.016731 | Up | 4.69E-12 | 1.30E-11 |
| LOC100365822 | 506  | 744    | 1616.5 | 52.63675 | 106.4987 | 1.016693 | Up | 0        | 0        |
| Hivep2       | 9731 | 2268.5 | 4922.5 | 8.344856 | 16.88014 | 1.016368 | Up | 0        | 0        |
| Ttc1         | 1471 | 1518   | 3280.5 | 36.87236 | 74.54241 | 1.015522 | Up | 2.68E-12 | 7.84E-12 |
| LOC361985    | 1583 | 1760.5 | 3806.5 | 39.72439 | 80.30761 | 1.015512 | Up | 6.29E-12 | 1.69E-11 |
| Rnf7         | 1256 | 1102   | 2383.5 | 31.3264  | 63.3145  | 1.015157 | Up | 2.55E-12 | 7.49E-12 |
| Tead3        | 2576 | 420.5  | 912    | 5.851074 | 11.81878 | 1.014307 | Up | 1.49E-13 | 5.55E-13 |
| Kcnt1        | 3714 | 467    | 1012.5 | 4.505112 | 9.09903  | 1.01415  | Up | 6.78E-13 | 2.20E-12 |
| Zdhhc4       | 1279 | 503.5  | 1092.5 | 14.1129  | 28.4998  | 1.013937 | Up | 3.35E-13 | 1.17E-12 |
| Tceal1       | 1215 | 131    | 282    | 3.82932  | 7.732    | 1.013753 | Up | 1.47E-13 | 5.46E-13 |
| Surf1        | 981  | 80     | 173    | 2.913426 | 5.882282 | 1.013659 | Up | 3.59E-09 | 8.47E-09 |
| Grk4         | 1997 | 201    | 432.5  | 3.595587 | 7.25711  | 1.013168 | Up | 0        | 0        |
| Dcp1a        | 1806 | 461    | 1001   | 9.149595 | 18.46672 | 1.013148 | Up | 7.39E-13 | 2.38E-12 |
| Bloc1s2      | 936  | 1370.5 | 2951.5 | 52.18983 | 105.3266 | 1.01303  | Up | 2.05E-12 | 6.13E-12 |
| Snw1         | 2275 | 1904.5 | 4111.5 | 29.89279 | 60.32397 | 1.012934 | Up | 4.81E-12 | 1.32E-11 |
| Faf2         | 1994 | 1492   | 3228   | 26.76599 | 53.98662 | 1.012201 | Up | 1.99E-12 | 5.94E-12 |
| Rnf20        | 4234 | 1992   | 4296.5 | 16.81325 | 33.9059  | 1.011938 | Up | 2.46E-13 | 8.82E-13 |
| LOC100911902 | 624  | 23     | 49.5   | 1.318014 | 2.657848 | 1.011893 | Up | 0.002118 | 0.003502 |

|            |      |        |        |          |          |          |    |          |          |
|------------|------|--------|--------|----------|----------|----------|----|----------|----------|
| RGD1311080 | 3047 | 20     | 43     | 0.23337  | 0.470572 | 1.011799 | Up | 0.00369  | 0.006004 |
| Ankrd39    | 1095 | 304.5  | 657    | 9.942563 | 20.04688 | 1.011688 | Up | 0        | 0        |
| Mmp3       | 1771 | 3492   | 7530.5 | 70.38493 | 141.9095 | 1.011633 | Up | 0        | 0        |
| RGD1562500 | 1071 | 25.5   | 55     | 0.851714 | 1.716223 | 1.010796 | Up | 0.000752 | 0.001292 |
| Ino80c     | 2547 | 805.5  | 1735   | 11.29803 | 22.76444 | 1.01071  | Up | 1.90E-12 | 5.71E-12 |
| Ints7      | 3415 | 2260   | 4885.5 | 23.67682 | 47.70428 | 1.010643 | Up | 0        | 0        |
| Dnm3       | 3252 | 88     | 190.5  | 0.969538 | 1.953148 | 1.010431 | Up | 6.57E-10 | 1.59E-09 |
| Sp140      | 3003 | 559    | 1207   | 6.663431 | 13.4228  | 1.010349 | Up | 3.48E-13 | 1.21E-12 |
| Cdk6       | 1503 | 903.5  | 1950   | 21.50374 | 43.31323 | 1.01022  | Up | 0        | 0        |
| Mrpl32     | 768  | 876.5  | 1889.5 | 40.71796 | 82.01162 | 1.010163 | Up | 1.50E-12 | 4.58E-12 |
| Ilkap      | 1318 | 970    | 2093   | 26.30905 | 52.98452 | 1.010012 | Up | 0        | 0        |
| Btf3l4     | 1794 | 1026.5 | 2211.5 | 20.40543 | 41.09113 | 1.009874 | Up | 2.32E-12 | 6.87E-12 |
| Txn14b     | 1743 | 259.5  | 557.5  | 5.322682 | 10.71727 | 1.009712 | Up | 1.39E-13 | 5.21E-13 |
| Katna1     | 1852 | 522.5  | 1127   | 10.08939 | 20.30574 | 1.009048 | Up | 0        | 0        |
| Luc7l2     | 2647 | 3886.5 | 8382   | 52.51818 | 105.6953 | 1.009022 | Up | 2.56E-12 | 7.50E-12 |
| Ptcd1      | 2981 | 470    | 1009.5 | 5.623881 | 11.31789 | 1.008967 | Up | 1.65E-12 | 5.01E-12 |
| Mmp10      | 1717 | 1049   | 2256   | 21.80998 | 43.88908 | 1.008874 | Up | 1.06E-12 | 3.33E-12 |
| Wbp4       | 1574 | 652.5  | 1405   | 14.81878 | 29.81923 | 1.008816 | Up | 1.68E-12 | 5.10E-12 |
| Acyp2      | 1156 | 402.5  | 864    | 12.39241 | 24.93556 | 1.008748 | Up | 1.18E-14 | 4.87E-14 |
| Hspb11     | 735  | 219    | 473    | 10.66662 | 21.4624  | 1.008708 | Up | 3.38E-13 | 1.18E-12 |
| Arpp19     | 339  | 366.5  | 787.5  | 38.62088 | 77.63884 | 1.007398 | Up | 0        | 0        |
| Chd1       | 6568 | 2866   | 6164.5 | 15.58296 | 31.31729 | 1.00699  | Up | 0        | 0        |
| Prkg1      | 2016 | 146.5  | 317    | 2.608141 | 5.241329 | 1.00691  | Up | 3.40E-14 | 1.38E-13 |
| Ticam2     | 3315 | 97     | 209    | 1.047916 | 2.104387 | 1.005877 | Up | 1.01E-10 | 2.52E-10 |
| Scal       | 2040 | 155.5  | 334.5  | 2.726892 | 5.473352 | 1.005167 | Up | 3.73E-13 | 1.29E-12 |

|              |      |        |        |          |          |          |    |          |          |
|--------------|------|--------|--------|----------|----------|----------|----|----------|----------|
| Yae1d1       | 3433 | 1231   | 2635.5 | 12.78316 | 25.63315 | 1.003766 | Up | 3.14E-12 | 9.07E-12 |
| Ttc30a1      | 2466 | 36     | 77.5   | 0.523546 | 1.049809 | 1.003739 | Up | 0.000104 | 0.000194 |
| Ppcs         | 1371 | 154    | 330    | 4.00143  | 8.023083 | 1.003641 | Up | 2.09E-13 | 7.60E-13 |
| LOC100911627 | 774  | 142    | 305.5  | 6.567846 | 13.16799 | 1.003542 | Up | 2.97E-13 | 1.05E-12 |
| LOC100360828 | 339  | 1121   | 2402.5 | 118.0077 | 236.5745 | 1.003413 | Up | 4.79E-12 | 1.32E-11 |
| Fbxl7        | 3473 | 18     | 39     | 0.186119 | 0.373103 | 1.003346 | Up | 0.005355 | 0.008582 |
| Taf2         | 5042 | 1726.5 | 3697.5 | 12.20475 | 24.46487 | 1.003269 | Up | 1.07E-12 | 3.35E-12 |
| RGD1565641   | 412  | 762    | 1636.5 | 66.12315 | 132.5378 | 1.003176 | Up | 1.46E-12 | 4.47E-12 |
| LOC100910516 | 507  | 112.5  | 241.5  | 7.92706  | 15.8881  | 1.003089 | Up | 4.01E-12 | 1.13E-11 |
| Elp6         | 1303 | 421    | 906    | 11.5629  | 23.1751  | 1.003072 | Up | 4.13E-13 | 1.41E-12 |
| Bnip3        | 1641 | 6153   | 13171  | 133.6616 | 267.8876 | 1.003043 | Up | 1.71E-11 | 4.42E-11 |
| Intu         | 2636 | 180.5  | 388    | 2.449712 | 4.909515 | 1.002969 | Up | 3.16E-13 | 1.11E-12 |
| Klhl2        | 3009 | 2558   | 5485   | 30.37379 | 60.86622 | 1.002815 | Up | 0        | 0        |
| Zfp74        | 2809 | 207    | 442.5  | 2.628353 | 5.266613 | 1.002716 | Up | 1.16E-13 | 4.45E-13 |
| Lin9         | 3163 | 954.5  | 2045.5 | 10.77738 | 21.59468 | 1.002669 | Up | 1.35E-12 | 4.16E-12 |
| Lrrc32       | 3953 | 41.5   | 89.5   | 0.375883 | 0.753066 | 1.002493 | Up | 2.23E-05 | 4.39E-05 |
| Ccdc99       | 2310 | 955.5  | 2049   | 14.78946 | 29.62428 | 1.002211 | Up | 1.30E-12 | 4.01E-12 |
| LOC100911033 | 1818 | 433.5  | 929    | 8.507395 | 17.03941 | 1.002086 | Up | 1.10E-12 | 3.43E-12 |
| RGD1565495   | 1371 | 84     | 179.5  | 2.188226 | 4.382045 | 1.001843 | Up | 3.40E-09 | 8.01E-09 |
| Igbp1        | 1464 | 649.5  | 1389   | 15.83147 | 31.69241 | 1.001342 | Up | 2.14E-12 | 6.35E-12 |
| Calm2        | 1112 | 11829  | 25257  | 379.0116 | 758.5391 | 1.000982 | Up | 0        | 0        |
| Kif21a       | 6087 | 1574   | 3374.5 | 9.242604 | 18.49702 | 1.000921 | Up | 5.47E-12 | 1.49E-11 |
| RGD1560568   | 555  | 24     | 51.5   | 1.539117 | 3.079406 | 1.000549 | Up | 0.001762 | 0.002938 |
| Naa20        | 1173 | 1220   | 2610   | 37.13341 | 74.28702 | 1.000393 | Up | 7.20E-12 | 1.92E-11 |
| Gdnf         | 700  | 126    | 271    | 6.447536 | 12.89846 | 1.00038  | Up | 3.09E-13 | 1.09E-12 |

|              |      |        |       |          |          |          |      |          |          |
|--------------|------|--------|-------|----------|----------|----------|------|----------|----------|
| RGD1564400   | 984  | 345.5  | 741   | 12.5586  | 25.1236  | 1.000368 | Up   | 9.33E-13 | 2.96E-12 |
| Rpl24        | 541  | 9923.5 | 21147 | 652.2227 | 1304.502 | 1.000063 | Up   | 0        | 0        |
| C1ql4        | 873  | 11.5   | 0     | 0.473013 | 0.001    | -8.88574 | Down | 0.000488 | 0.000865 |
| Hhpl1        | 2578 | 9      | 0     | 0.12381  | 0.001    | -6.95198 | Down | 0.001953 | 0.003239 |
| Ankrd22      | 714  | 25     | 1     | 1.257733 | 0.04676  | -4.7494  | Down | 4.17E-07 | 9.05E-07 |
| Serpib8      | 3029 | 202.5  | 9.5   | 2.389498 | 0.103376 | -4.53074 | Down | 6.38E-49 | 3.62E-48 |
| Trim54       | 1450 | 16     | 1     | 0.39564  | 0.023025 | -4.10289 | Down | 0.000145 | 0.000265 |
| Plk1         | 2198 | 6371.5 | 447   | 104.0135 | 6.774615 | -3.94049 | Down | 0        | 0        |
| Ucp1         | 1222 | 13.5   | 1     | 0.393672 | 0.028058 | -3.81051 | Down | 0.000976 | 0.001662 |
| Pcdh8        | 2919 | 39     | 3     | 0.47593  | 0.034005 | -3.80693 | Down | 3.02E-09 | 7.15E-09 |
| Rs1          | 675  | 12.5   | 1     | 0.666475 | 0.049462 | -3.75216 | Down | 0.001831 | 0.00305  |
| Adam11       | 2528 | 12     | 1     | 0.169403 | 0.012851 | -3.72054 | Down | 0.001831 | 0.00305  |
| Ppp1r1b      | 1764 | 486    | 40    | 9.866773 | 0.759111 | -3.70019 | Down | 9.92E-99 | 7.01E-98 |
| Fam181b      | 1522 | 1718.5 | 143   | 40.45941 | 3.130364 | -3.69207 | Down | 0        | 0        |
| Vom1r95      | 945  | 28.5   | 2.5   | 1.088582 | 0.086896 | -3.64701 | Down | 4.63E-07 | 1.00E-06 |
| Fbn2         | 8756 | 556.5  | 51    | 2.274352 | 0.193642 | -3.55399 | Down | #####    | #####    |
| Olfml2b      | 3122 | 197    | 19    | 2.261984 | 0.200592 | -3.49525 | Down | 9.46E-39 | 5.05E-38 |
| RGD1565157   | 1341 | 26.5   | 2.5   | 0.696222 | 0.061907 | -3.49138 | Down | 1.62E-06 | 3.41E-06 |
| Lypd6        | 709  | 197    | 19    | 9.964428 | 0.906135 | -3.45899 | Down | 9.46E-39 | 5.04E-38 |
| Klrb1c       | 654  | 79     | 8     | 4.334715 | 0.407025 | -3.41275 | Down | 4.60E-16 | 1.96E-15 |
| Cdc20        | 1777 | 4389   | 445   | 88.46724 | 8.339015 | -3.40719 | Down | 0        | 0        |
| Svs4         | 597  | 28.5   | 3     | 1.726015 | 0.16325  | -3.40229 | Down | 2.56E-06 | 5.32E-06 |
| Gpr37        | 3104 | 628.5  | 64    | 7.240702 | 0.687808 | -3.39605 | Down | #####    | #####    |
| LOC100365744 | 995  | 836.5  | 86    | 30.13467 | 2.892931 | -3.38082 | Down | #####    | #####    |
| Sox12        | 1020 | 647    | 67.5  | 22.81136 | 2.195744 | -3.37697 | Down | #####    | #####    |

|              |      |        |       |          |          |          |      |          |          |
|--------------|------|--------|-------|----------|----------|----------|------|----------|----------|
| Sdk2         | 6162 | 3768.5 | 400   | 21.92358 | 2.16435  | -3.34048 | Down | 0        | 0        |
| Chtf18       | 3100 | 1290   | 139.5 | 14.90154 | 1.504294 | -3.3083  | Down | #####    | #####    |
| Gli1         | 3501 | 120    | 13.5  | 1.232072 | 0.129641 | -3.2485  | Down | 4.06E-23 | 1.88E-22 |
| Tcf7         | 2964 | 1151   | 133   | 13.91357 | 1.49843  | -3.21497 | Down | #####    | #####    |
| Tubb2b       | 1700 | 4155   | 489   | 87.55592 | 9.610501 | -3.18752 | Down | 0        | 0        |
| LOC100911871 | 648  | 33     | 4     | 1.832029 | 0.206091 | -3.15209 | Down | 6.04E-07 | 1.30E-06 |
| Lrrc15       | 1737 | 420.5  | 51.5  | 8.70002  | 0.985993 | -3.14137 | Down | 1.71E-73 | 1.11E-72 |
| Fam64a       | 1487 | 3201   | 390   | 76.98543 | 8.731039 | -3.14036 | Down | 0        | 0        |
| Negr1        | 1809 | 24     | 3     | 0.474102 | 0.053875 | -3.1375  | Down | 2.74E-05 | 5.37E-05 |
| Ntng1        | 5085 | 45     | 5.5   | 0.316779 | 0.036023 | -3.13648 | Down | 2.33E-09 | 5.53E-09 |
| Igfbp5       | 1630 | 6404.5 | 788.5 | 141.0781 | 16.1658  | -3.12548 | Down | 0        | 0        |
| RGD1307119   | 2041 | 122    | 15    | 2.143986 | 0.248458 | -3.10922 | Down | 2.84E-22 | 1.31E-21 |
| Wnt4         | 1211 | 390.5  | 48.5  | 11.53751 | 1.338985 | -3.10712 | Down | 6.18E-68 | 3.90E-67 |
| Scg3         | 2144 | 54.5   | 7     | 0.921236 | 0.109425 | -3.07363 | Down | 2.43E-10 | 5.96E-10 |
| Fasn         | 9136 | 21488  | 2745  | 84.20284 | 10.03179 | -3.06929 | Down | 0        | 0        |
| Scd1         | 4475 | 2954.5 | 377.5 | 23.63332 | 2.815927 | -3.06914 | Down | 0        | 0        |
| Mpz          | 1029 | 47     | 6     | 1.628284 | 0.194675 | -3.06421 | Down | 3.26E-09 | 7.68E-09 |
| Olr428       | 936  | 15.5   | 2     | 0.594708 | 0.072301 | -3.0401  | Down | 0.001312 | 0.002211 |
| Olr1568      | 939  | 71     | 9.5   | 2.730693 | 0.335383 | -3.02539 | Down | 2.46E-13 | 8.83E-13 |
| Crmp1        | 2846 | 1517   | 203   | 19.10634 | 2.381421 | -3.00416 | Down | #####    | #####    |
| Ace          | 4142 | 2926   | 399.5 | 25.30381 | 3.219213 | -2.97457 | Down | 0        | 0        |
| Jup          | 3463 | 3390.5 | 464.5 | 35.14363 | 4.482537 | -2.97088 | Down | 0        | 0        |
| Cd93         | 4779 | 583    | 80    | 4.36131  | 0.557197 | -2.9685  | Down | 1.76E-95 | 1.23E-94 |
| Mafa         | 1086 | 21     | 3     | 0.696165 | 0.0914   | -2.92916 | Down | 0.000157 | 0.000286 |
| Tm4sf1       | 1950 | 6557.5 | 924   | 120.1754 | 15.84006 | -2.92349 | Down | 0        | 0        |

|              |       |         |        |          |          |          |      |          |          |
|--------------|-------|---------|--------|----------|----------|----------|------|----------|----------|
| Taar4        | 1044  | 21.5    | 3      | 0.739387 | 0.097663 | -2.92044 | Down | 0.000157 | 0.000286 |
| Rtn4rl2      | 1304  | 654     | 94.5   | 18.03973 | 2.408821 | -2.90478 | Down | #####    | #####    |
| Pcdha1       | 5244  | 49.5    | 7      | 0.337388 | 0.045082 | -2.9038  | Down | 4.24E-09 | 9.96E-09 |
| Fdps         | 1271  | 17361.5 | 2541.5 | 489.9513 | 66.81041 | -2.87449 | Down | 0        | 0        |
| Ranbp1       | 1052  | 8507    | 1246   | 290.0186 | 39.58647 | -2.87307 | Down | 0        | 0        |
| Erb3         | 4224  | 2905.5  | 432.5  | 24.628   | 3.415636 | -2.85007 | Down | 0        | 0        |
| Tmprss3      | 2691  | 19.5    | 3      | 0.260258 | 0.036217 | -2.8452  | Down | 0.000488 | 0.000866 |
| Rab3d        | 2226  | 890.5   | 133.5  | 14.32353 | 2.008172 | -2.83443 | Down | #####    | #####    |
| Taar8a       | 1125  | 16.5    | 2.5    | 0.525076 | 0.073793 | -2.83097 | Down | 0.000729 | 0.001252 |
| LOC100912950 | 1047  | 26      | 4      | 0.886409 | 0.125833 | -2.81646 | Down | 3.40E-05 | 6.59E-05 |
| Fgfr1        | 2351  | 1774.5  | 272.5  | 27.07268 | 3.86808  | -2.80715 | Down | #####    | #####    |
| LOC313641    | 14269 | 10936   | 1693.5 | 27.44601 | 3.967175 | -2.79041 | Down | 0        | 0        |
| Fads1        | 3380  | 8925.5  | 1385   | 94.60516 | 13.67909 | -2.78995 | Down | 0        | 0        |
| Cenpf        | 10069 | 9506    | 1473.5 | 33.71313 | 4.883108 | -2.78744 | Down | 0        | 0        |
| Ccrl2        | 1979  | 26      | 4      | 0.470698 | 0.068392 | -2.78291 | Down | 3.40E-05 | 6.59E-05 |
| Bace2        | 1545  | 634     | 100    | 14.69574 | 2.149308 | -2.77345 | Down | 5.13E-96 | 3.60E-95 |
| Klf13        | 602   | 249     | 39.5   | 14.90358 | 2.18543  | -2.76967 | Down | 7.50E-39 | 4.00E-38 |
| Iqgap3       | 5795  | 3132    | 495.5  | 19.35941 | 2.852479 | -2.76275 | Down | 0        | 0        |
| Cspg4        | 8074  | 11462.5 | 1824   | 50.84113 | 7.543763 | -2.75264 | Down | 0        | 0        |
| Cdc25b       | 2804  | 2126.5  | 339.5  | 27.15562 | 4.050561 | -2.74506 | Down | 0        | 0        |
| LOC100910695 | 5042  | 2869    | 460    | 20.34705 | 3.043144 | -2.74119 | Down | 0        | 0        |
| Cmklr1       | 2530  | 31      | 5      | 0.440491 | 0.066338 | -2.73121 | Down | 7.43E-06 | 1.50E-05 |
| Sv2b         | 5213  | 467.5   | 76     | 3.202153 | 0.485363 | -2.72191 | Down | 7.23E-70 | 4.60E-69 |
| Ppp1r9a      | 3846  | 57.5    | 9.5    | 0.53595  | 0.081416 | -2.71872 | Down | 6.81E-10 | 1.64E-09 |
| Paqr4        | 2033  | 1430.5  | 233.5  | 25.26835 | 3.839287 | -2.71842 | Down | #####    | #####    |

|              |      |         |         |          |          |          |      |          |          |
|--------------|------|---------|---------|----------|----------|----------|------|----------|----------|
| Plxnd1       | 6104 | 1372.5  | 225.5   | 8.072585 | 1.23186  | -2.71219 | Down | #####    | #####    |
| Slc25a23     | 3184 | 152     | 25      | 1.714008 | 0.261863 | -2.71049 | Down | 1.25E-23 | 5.82E-23 |
| Rxra         | 1404 | 631.5   | 104.5   | 16.14811 | 2.475051 | -2.70584 | Down | 4.40E-93 | 3.06E-92 |
| F5           | 6315 | 79      | 13      | 0.44828  | 0.068872 | -2.7024  | Down | 6.22E-13 | 2.04E-12 |
| Prex2        | 4852 | 415     | 68.5    | 3.051384 | 0.470888 | -2.69601 | Down | 5.11E-62 | 3.13E-61 |
| Selenbp1     | 1685 | 429     | 71      | 9.116175 | 1.413747 | -2.6889  | Down | 1.14E-63 | 7.07E-63 |
| Nkain1       | 2429 | 2091.5  | 347     | 30.8702  | 4.789554 | -2.68825 | Down | #####    | #####    |
| Arhgef17     | 7405 | 1880    | 314.5   | 9.098134 | 1.418285 | -2.68142 | Down | #####    | #####    |
| Tgfb1        | 2696 | 4231    | 709     | 56.07347 | 8.780137 | -2.675   | Down | 0        | 0        |
| LOC363060    | 1312 | 109.5   | 18.5    | 2.987137 | 0.469059 | -2.67092 | Down | 2.65E-17 | 1.15E-16 |
| Col15a1      | 5193 | 482     | 82      | 3.319755 | 0.527194 | -2.65467 | Down | 4.03E-70 | 2.57E-69 |
| Fkbp5        | 3508 | 2834.5  | 482     | 28.92246 | 4.597618 | -2.65323 | Down | 0        | 0        |
| LOC681309    | 3174 | 689.5   | 118     | 7.783715 | 1.239806 | -2.65034 | Down | 4.46E-99 | 3.16E-98 |
| Abca7        | 6513 | 1278    | 218     | 7.031176 | 1.120547 | -2.64956 | Down | #####    | #####    |
| Metrn        | 924  | 2854.5  | 493.5   | 110.6765 | 17.77656 | -2.6383  | Down | 0        | 0        |
| Fam149a      | 3966 | 1029.5  | 177.5   | 9.295676 | 1.493673 | -2.63769 | Down | #####    | #####    |
| XAF1         | 1011 | 172     | 30      | 6.089452 | 0.981804 | -2.63281 | Down | 1.25E-25 | 5.94E-25 |
| Nthl1        | 1084 | 813     | 141     | 26.86969 | 4.346901 | -2.62792 | Down | #####    | #####    |
| Limk1        | 3290 | 2899    | 509     | 31.60727 | 5.157929 | -2.61539 | Down | 0        | 0        |
| Six3         | 1598 | 203     | 36      | 4.565057 | 0.751017 | -2.60372 | Down | 1.13E-29 | 5.61E-29 |
| Kif21b       | 5387 | 1467    | 260.5   | 9.771183 | 1.614575 | -2.59738 | Down | #####    | #####    |
| Tubb5        | 2395 | 87175.5 | 15539.5 | 1306.537 | 216.635  | -2.59241 | Down | 0        | 0        |
| Avp          | 585  | 16.5    | 3       | 1.013682 | 0.168137 | -2.59189 | Down | 0.002577 | 0.004234 |
| LOC100912243 | 844  | 57      | 10      | 2.403731 | 0.399844 | -2.58777 | Down | 2.36E-09 | 5.60E-09 |
| Pif1         | 1915 | 106     | 19      | 1.9756   | 0.329843 | -2.58244 | Down | 4.52E-16 | 1.93E-15 |



|              |       |        |        |          |          |          |      |          |          |
|--------------|-------|--------|--------|----------|----------|----------|------|----------|----------|
| LOC100911260 | 4927  | 2855   | 515.5  | 20.79164 | 3.489436 | -2.57494 | Down | 0        | 0        |
| Dip2a        | 5445  | 1719   | 310    | 11.31455 | 1.899488 | -2.5745  | Down | #####    | #####    |
| RGD1564114   | 1739  | 17     | 3      | 0.352116 | 0.059149 | -2.57362 | Down | 0.00149  | 0.002499 |
| Elovl6       | 2490  | 857.5  | 154.5  | 12.28483 | 2.064181 | -2.57324 | Down | #####    | #####    |
| Capn5        | 2150  | 2172   | 391.5  | 36.19393 | 6.082227 | -2.57308 | Down | #####    | #####    |
| Odf4         | 1464  | 19.5   | 3.5    | 0.478775 | 0.08074  | -2.56799 | Down | 0.000488 | 0.000866 |
| LOC100911959 | 2411  | 1984.5 | 359    | 29.4365  | 4.968339 | -2.56677 | Down | #####    | #####    |
| Usp5         | 3207  | 3981   | 720.5  | 44.4246  | 7.499017 | -2.56659 | Down | 0        | 0        |
| Hist1h2bc    | 381   | 81     | 15     | 7.645086 | 1.293181 | -2.56361 | Down | 2.38E-12 | 7.02E-12 |
| Map1a        | 10120 | 6943   | 1273.5 | 24.57299 | 4.207842 | -2.54592 | Down | 0        | 0        |
| Tgfb1        | 1482  | 14321  | 2639   | 347.2647 | 59.47321 | -2.54572 | Down | 0        | 0        |
| Col9a3       | 2845  | 263    | 48     | 3.307301 | 0.567089 | -2.54401 | Down | 2.72E-37 | 1.44E-36 |
| Tcf3         | 2562  | 4610.5 | 850.5  | 64.50648 | 11.07542 | -2.54208 | Down | 0        | 0        |
| Olr1581      | 933   | 13.5   | 2.5    | 0.518071 | 0.088979 | -2.54162 | Down | 0.004181 | 0.006747 |
| Tril         | 4859  | 231    | 42.5   | 1.701394 | 0.292301 | -2.54119 | Down | 5.05E-33 | 2.58E-32 |
| LOC100909468 | 2758  | 914.5  | 169.5  | 11.9115  | 2.049751 | -2.53883 | Down | #####    | #####    |
| Acaca        | 7038  | 3578.5 | 660    | 18.18122 | 3.129624 | -2.53839 | Down | 0        | 0        |
| Ssbp4        | 1525  | 2352.5 | 436.5  | 55.46382 | 9.558947 | -2.53662 | Down | 0        | 0        |
| Nfix         | 1445  | 4676   | 868.5  | 116.1044 | 20.0191  | -2.53597 | Down | 0        | 0        |
| Col23a1      | 2733  | 16     | 3      | 0.210328 | 0.036319 | -2.53383 | Down | 0.002577 | 0.004234 |
| Mmp14        | 2448  | 3477   | 646.5  | 50.94581 | 8.799764 | -2.53343 | Down | 0        | 0        |
| Rnf144a      | 1657  | 145    | 27     | 3.130957 | 0.543479 | -2.52631 | Down | 5.89E-21 | 2.68E-20 |
| Kcna1        | 1746  | 217    | 40.5   | 4.451556 | 0.775725 | -2.52069 | Down | 7.76E-31 | 3.88E-30 |
| Efhd1        | 1832  | 113.5  | 21     | 2.219893 | 0.387622 | -2.51777 | Down | 1.16E-16 | 5.00E-16 |
| Pcdhac2      | 5418  | 727.5  | 138    | 4.810337 | 0.845068 | -2.509   | Down | 1.67E-97 | 1.18E-96 |

|              |      |         |        |          |          |          |      |          |          |
|--------------|------|---------|--------|----------|----------|----------|------|----------|----------|
| Tnfaip8l1    | 804  | 125     | 23.5   | 5.579718 | 0.982015 | -2.50637 | Down | 2.12E-18 | 9.34E-18 |
| Prph         | 1753 | 591.5   | 111.5  | 12.10462 | 2.130508 | -2.50629 | Down | 3.52E-80 | 2.35E-79 |
| Itga6        | 5979 | 28819.5 | 5432.5 | 172.4278 | 30.35118 | -2.50617 | Down | 0        | 0        |
| Haplh1       | 2191 | 422     | 79.5   | 6.879507 | 1.214104 | -2.50241 | Down | 7.26E-58 | 4.35E-57 |
| Htr1b        | 1161 | 123     | 23.5   | 3.804324 | 0.671524 | -2.50213 | Down | 6.08E-18 | 2.66E-17 |
| Lmb1         | 2154 | 5091.5  | 966    | 84.75444 | 14.97668 | -2.50057 | Down | 0        | 0        |
| Nfic         | 1565 | 4245.5  | 810    | 97.40637 | 17.28238 | -2.49471 | Down | 0        | 0        |
| Hspa12a      | 6331 | 58      | 11     | 0.327458 | 0.058151 | -2.49343 | Down | 4.47E-09 | 1.05E-08 |
| Rps6ka4      | 3119 | 4170    | 794.5  | 47.91399 | 8.512527 | -2.49279 | Down | 0        | 0        |
| Abhd8        | 1982 | 1864    | 357    | 33.76106 | 5.998684 | -2.49264 | Down | #####    | #####    |
| Dsp          | 9607 | 623     | 118.5  | 2.318163 | 0.412521 | -2.49044 | Down | 6.20E-84 | 4.20E-83 |
| RGD1563510   | 5590 | 1964    | 376.5  | 12.59676 | 2.244094 | -2.48885 | Down | #####    | #####    |
| Dhcr24       | 1551 | 12407.5 | 2375.5 | 286.6834 | 51.11207 | -2.48772 | Down | 0        | 0        |
| Zbtb42       | 1727 | 170     | 32.5   | 3.535661 | 0.634813 | -2.47758 | Down | 3.80E-24 | 1.78E-23 |
| Gas2l1       | 2725 | 1779.5  | 345    | 23.45929 | 4.222    | -2.47416 | Down | #####    | #####    |
| Gpr125       | 4043 | 1307.5  | 252.5  | 11.56891 | 2.082122 | -2.47413 | Down | #####    | #####    |
| Prhr         | 1452 | 170     | 32.5   | 4.181204 | 0.753183 | -2.47285 | Down | 3.80E-24 | 1.78E-23 |
| Slc6a17      | 6411 | 535     | 103    | 2.988627 | 0.539907 | -2.4687  | Down | 1.69E-71 | 1.09E-70 |
| Fbxo23       | 1632 | 377.5   | 73     | 8.269159 | 1.494508 | -2.46807 | Down | 1.14E-50 | 6.51E-50 |
| Racgap1      | 2474 | 3600.5  | 700.5  | 52.03408 | 9.447296 | -2.46148 | Down | 0        | 0        |
| Grap2        | 1288 | 31      | 6      | 0.862578 | 0.156926 | -2.45857 | Down | 2.43E-05 | 4.78E-05 |
| S100a16      | 1036 | 59.5    | 11.5   | 2.043218 | 0.37191  | -2.45782 | Down | 2.63E-09 | 6.24E-09 |
| Hcfc1        | 9128 | 6508    | 1273   | 25.54703 | 4.653792 | -2.45668 | Down | 0        | 0        |
| LOC100909752 | 5193 | 856     | 168    | 5.904705 | 1.077332 | -2.4544  | Down | #####    | #####    |
| Tp53i11      | 2664 | 1168.5  | 229.5  | 15.73582 | 2.872681 | -2.45358 | Down | #####    | #####    |

|              |       |         |        |          |          |          |      |          |          |
|--------------|-------|---------|--------|----------|----------|----------|------|----------|----------|
| Shf          | 1444  | 477.5   | 94     | 11.85598 | 2.168393 | -2.45092 | Down | 7.07E-63 | 4.35E-62 |
| Sdc3         | 4841  | 4098    | 806.5  | 30.36061 | 5.566539 | -2.44735 | Down | 0        | 0        |
| Htra3        | 2440  | 152     | 30     | 2.23382  | 0.410494 | -2.44408 | Down | 4.60E-21 | 2.09E-20 |
| Plcb3        | 3726  | 2843    | 561.5  | 27.34999 | 5.032165 | -2.44229 | Down | 0        | 0        |
| Scx          | 1134  | 313     | 62     | 9.895387 | 1.825381 | -2.43856 | Down | 1.14E-41 | 6.21E-41 |
| Gper         | 1278  | 836     | 166.5  | 23.44519 | 4.335253 | -2.4351  | Down | #####    | #####    |
| Itga9        | 4495  | 1330    | 264.5  | 10.59076 | 1.963284 | -2.43147 | Down | #####    | #####    |
| Ttyh3        | 4473  | 5269.5  | 1050.5 | 42.22144 | 7.82904  | -2.43107 | Down | 0        | 0        |
| LOC100909901 | 2115  | 2753.5  | 549    | 46.60635 | 8.654023 | -2.42908 | Down | 0        | 0        |
| Pik3cd       | 4788  | 87.5    | 17.5   | 0.656269 | 0.121934 | -2.42819 | Down | 9.95E-13 | 3.14E-12 |
| Cyb5r3       | 1893  | 6680.5  | 1339   | 126.7419 | 23.61307 | -2.42424 | Down | 0        | 0        |
| Ncan         | 5201  | 145.5   | 29     | 1.003641 | 0.187025 | -2.42394 | Down | 5.62E-20 | 2.52E-19 |
| Crat         | 2757  | 3273    | 660    | 42.60522 | 7.991511 | -2.41449 | Down | 0        | 0        |
| Kctd17       | 1634  | 1023.5  | 206    | 22.43924 | 4.21021  | -2.41406 | Down | #####    | #####    |
| Ttll12       | 2412  | 4082    | 826    | 60.73184 | 11.42525 | -2.41023 | Down | 0        | 0        |
| Nkx2-2       | 1393  | 634.5   | 129    | 16.38068 | 3.08277  | -2.4097  | Down | 4.51E-81 | 3.03E-80 |
| Idh2         | 1695  | 3663.5  | 738.5  | 77.3943  | 14.56791 | -2.40943 | Down | 0        | 0        |
| Angptl2      | 2138  | 3928.5  | 794.5  | 65.91042 | 12.42389 | -2.40739 | Down | 0        | 0        |
| LOC366669    | 20881 | 2951    | 595.5  | 5.044256 | 0.951051 | -2.40705 | Down | 0        | 0        |
| Col13a1      | 3146  | 69      | 14     | 0.784638 | 0.148002 | -2.40641 | Down | 4.07E-10 | 9.90E-10 |
| Mc4r         | 1888  | 71      | 14.5   | 1.353255 | 0.255698 | -2.40392 | Down | 1.45E-10 | 3.57E-10 |
| Hnmpa0       | 681   | 941     | 192    | 49.74642 | 9.405092 | -2.40308 | Down | #####    | #####    |
| Rcc2         | 3497  | 12542.5 | 2542   | 128.2978 | 24.26402 | -2.40261 | Down | 0        | 0        |
| Tcf7l1       | 2736  | 326.5   | 66.5   | 4.292506 | 0.815268 | -2.39647 | Down | 1.18E-42 | 6.47E-42 |
| LOC686288    | 1685  | 19.5    | 4      | 0.419043 | 0.079791 | -2.39281 | Down | 0.001544 | 0.002588 |

|         |       |        |        |          |          |          |      |          |          |
|---------|-------|--------|--------|----------|----------|----------|------|----------|----------|
| Trpm4   | 4203  | 713    | 145.5  | 6.073432 | 1.157823 | -2.3911  | Down | 5.44E-91 | 3.77E-90 |
| Trim40  | 744   | 17     | 3.5    | 0.826106 | 0.157666 | -2.38945 | Down | 0.00149  | 0.0025   |
| Cnp     | 2326  | 3281   | 673    | 50.53661 | 9.660845 | -2.38711 | Down | 0        | 0        |
| Slc43a3 | 2030  | 575    | 118.5  | 10.14694 | 1.950486 | -2.37914 | Down | 3.22E-73 | 2.09E-72 |
| Pitpnm1 | 4191  | 1144.5 | 236.5  | 9.795747 | 1.885214 | -2.37743 | Down | #####    | #####    |
| Sh3glb2 | 1849  | 2066.5 | 428    | 40.07201 | 7.717553 | -2.37638 | Down | #####    | #####    |
| Cyfip2  | 6253  | 3511   | 728.5  | 20.10313 | 3.88862  | -2.37009 | Down | 0        | 0        |
| Lmf2    | 2760  | 3003.5 | 625    | 39.03338 | 7.560093 | -2.36823 | Down | 0        | 0        |
| Dctn1   | 4432  | 6895.5 | 1434.5 | 55.75509 | 10.80515 | -2.36738 | Down | 0        | 0        |
| Osbp2   | 3952  | 681    | 142    | 6.171747 | 1.200083 | -2.36255 | Down | 2.38E-85 | 1.62E-84 |
| Syt7    | 1440  | 300    | 63     | 7.464796 | 1.453798 | -2.36028 | Down | 2.53E-38 | 1.34E-37 |
| Azi1    | 3600  | 606    | 127    | 6.034661 | 1.177063 | -2.35808 | Down | 7.56E-76 | 4.95E-75 |
| Trrap   | 12520 | 5452   | 1141   | 15.57688 | 3.04153  | -2.35654 | Down | 0        | 0        |
| Mepe    | 1655  | 6594.5 | 1380.5 | 142.7758 | 27.88541 | -2.35617 | Down | 0        | 0        |
| Gpd1    | 2848  | 2124   | 446    | 26.71867 | 5.226516 | -2.35393 | Down | #####    | #####    |
| Qprt    | 1225  | 164    | 34.5   | 4.795253 | 0.938445 | -2.35326 | Down | 7.69E-22 | 3.52E-21 |
| Alg9    | 2597  | 1133.5 | 238    | 15.58888 | 3.051044 | -2.35314 | Down | #####    | #####    |
| Mpa2l   | 1692  | 33     | 7      | 0.697561 | 0.136529 | -2.35311 | Down | 2.53E-05 | 4.96E-05 |
| Fxyd4   | 1362  | 52.5   | 11     | 1.37531  | 0.269644 | -2.35063 | Down | 1.01E-07 | 2.24E-07 |
| Plcd1   | 2791  | 1737   | 365.5  | 22.31496 | 4.384963 | -2.34737 | Down | #####    | #####    |
| lbsp    | 1948  | 267    | 56     | 4.89575  | 0.963943 | -2.34451 | Down | 2.59E-34 | 1.34E-33 |
| Ehd1    | 3250  | 2427   | 515    | 26.75517 | 5.269479 | -2.34409 | Down | #####    | #####    |
| Pde7b   | 1754  | 56     | 12     | 1.14376  | 0.225337 | -2.34363 | Down | 3.74E-08 | 8.50E-08 |
| Ptov1   | 1748  | 2865   | 608.5  | 58.71457 | 11.60511 | -2.33896 | Down | 0        | 0        |
| Cbs     | 2539  | 32.5   | 7      | 0.458375 | 0.090984 | -2.33285 | Down | 4.23E-05 | 8.16E-05 |

|              |      |         |        |          |          |          |      |          |          |
|--------------|------|---------|--------|----------|----------|----------|------|----------|----------|
| Sorcs2       | 5714 | 1472.5  | 314    | 9.237059 | 1.834067 | -2.33239 | Down | #####    | #####    |
| Erf          | 3711 | 4096.5  | 873.5  | 39.59444 | 7.868211 | -2.33119 | Down | 0        | 0        |
| Pde1c        | 3187 | 218.5   | 47     | 2.452481 | 0.488698 | -2.32723 | Down | 1.02E-27 | 4.98E-27 |
| Bckdk        | 1816 | 3396.5  | 727.5  | 67.01623 | 13.37817 | -2.32463 | Down | 0        | 0        |
| LOC100125365 | 1785 | 2714.5  | 582.5  | 54.59664 | 10.91757 | -2.32216 | Down | 0        | 0        |
| Carm1        | 3156 | 3884    | 836.5  | 44.15443 | 8.834511 | -2.32134 | Down | 0        | 0        |
| Nova2        | 1851 | 18.5    | 4      | 0.360582 | 0.072149 | -2.32128 | Down | 0.002599 | 0.00427  |
| Tuba1c       | 1559 | 4185.5  | 911.5  | 96.55821 | 19.41432 | -2.31428 | Down | 0        | 0        |
| Akt1         | 1613 | 8131    | 1757   | 180.6103 | 36.35513 | -2.31265 | Down | 0        | 0        |
| Pcdha10      | 5337 | 37      | 8      | 0.248613 | 0.050046 | -2.31258 | Down | 9.25E-06 | 1.86E-05 |
| Map2k6       | 1690 | 366     | 79     | 7.757648 | 1.566543 | -2.30803 | Down | 1.99E-45 | 1.10E-44 |
| LOC100363275 | 5461 | 9965    | 2168.5 | 65.36996 | 13.24458 | -2.30323 | Down | 0        | 0        |
| Alkbh2       | 1235 | 155.5   | 34     | 4.504804 | 0.916236 | -2.29767 | Down | 7.12E-20 | 3.20E-19 |
| LOC686539    | 2081 | 234     | 51     | 4.025884 | 0.819523 | -2.29645 | Down | 2.16E-29 | 1.07E-28 |
| Pcdha3       | 5226 | 47.5    | 10.5   | 0.325624 | 0.066477 | -2.29227 | Down | 4.52E-07 | 9.79E-07 |
| Sh2d3c       | 3078 | 32      | 7      | 0.373133 | 0.076221 | -2.29143 | Down | 4.23E-05 | 8.16E-05 |
| Pou6f1       | 2231 | 23      | 5      | 0.368128 | 0.075228 | -2.29086 | Down | 0.000546 | 0.000962 |
| RGD1311575   | 6819 | 2330.5  | 511.5  | 12.23129 | 2.500748 | -2.29014 | Down | #####    | #####    |
| RGD1564899   | 4909 | 236     | 52     | 1.724016 | 0.352926 | -2.28833 | Down | 2.22E-29 | 1.10E-28 |
| LOC498426    | 2062 | 893.5   | 197    | 15.55457 | 3.195394 | -2.28327 | Down | #####    | #####    |
| Arhgef1      | 3243 | 6413    | 1414.5 | 70.90527 | 14.57024 | -2.28287 | Down | 0        | 0        |
| LOC100912782 | 1562 | 17186.5 | 3825.5 | 394.6726 | 81.57502 | -2.27446 | Down | 0        | 0        |
| RGD1311021   | 1857 | 680.5   | 150.5  | 13.10833 | 2.712367 | -2.27286 | Down | 1.62E-81 | 1.09E-80 |
| RGD1563946   | 3025 | 1006    | 223.5  | 11.91834 | 2.467207 | -2.27223 | Down | #####    | #####    |
| Ppp2r5b      | 2213 | 530.5   | 118    | 8.580412 | 1.776567 | -2.27195 | Down | 1.94E-63 | 1.20E-62 |

|              |      |         |         |          |          |          |      |          |          |
|--------------|------|---------|---------|----------|----------|----------|------|----------|----------|
| Pcdha7       | 5211 | 54      | 12      | 0.371141 | 0.076884 | -2.27121 | Down | 1.03E-07 | 2.29E-07 |
| Svil         | 8155 | 4318.5  | 957.5   | 18.94224 | 3.925165 | -2.27078 | Down | 0        | 0        |
| Agrn         | 7286 | 5296.5  | 1179    | 26.02292 | 5.403301 | -2.26787 | Down | 0        | 0        |
| Lrp8         | 3176 | 2217    | 495     | 24.97245 | 5.193347 | -2.2656  | Down | #####    | #####    |
| Cxcl17       | 795  | 18      | 4       | 0.807301 | 0.167984 | -2.26478 | Down | 0.002599 | 0.00427  |
| Plip         | 1475 | 263.5   | 59      | 6.382549 | 1.32815  | -2.26471 | Down | 4.21E-32 | 2.13E-31 |
| Kazald1      | 1645 | 1487    | 331.5   | 32.347   | 6.734394 | -2.26401 | Down | #####    | #####    |
| Maz          | 1434 | 3558    | 804     | 89.2574  | 18.62984 | -2.26036 | Down | 0        | 0        |
| Myh14        | 6443 | 274.5   | 61.5    | 1.52608  | 0.318895 | -2.25868 | Down | 1.39E-33 | 7.12E-33 |
| Mvd          | 1704 | 2584    | 580     | 54.33149 | 11.35455 | -2.25852 | Down | #####    | #####    |
| Acan         | 6939 | 2111    | 473.5   | 10.88565 | 2.276092 | -2.2578  | Down | #####    | #####    |
| Slc25a1      | 1669 | 3290.5  | 739.5   | 70.65578 | 14.77981 | -2.25718 | Down | 0        | 0        |
| Arhgdia      | 1963 | 28151   | 6323    | 513.9222 | 107.5722 | -2.25624 | Down | 0        | 0        |
| Tuba1b       | 780  | 61529.5 | 13849.5 | 2826.859 | 591.9252 | -2.25571 | Down | 0        | 0        |
| RGD1561381   | 459  | 27      | 6       | 2.101148 | 0.440351 | -2.25445 | Down | 0.000195 | 0.000354 |
| LOC100909441 | 1552 | 8309    | 1887.5  | 192.4264 | 40.40087 | -2.25185 | Down | 0        | 0        |
| LOC100911365 | 1091 | 187.5   | 42.5    | 6.153673 | 1.293574 | -2.25009 | Down | 3.05E-23 | 1.41E-22 |
| Cdh3         | 3169 | 613     | 139     | 6.93499  | 1.463006 | -2.24496 | Down | 5.27E-72 | 3.40E-71 |
| Srebf2       | 5060 | 11260.5 | 2549.5  | 79.77514 | 16.83105 | -2.24481 | Down | 0        | 0        |
| LOC652956    | 2157 | 3843    | 878.5   | 64.04797 | 13.55121 | -2.24073 | Down | 0        | 0        |
| Nkd2         | 4024 | 4174.5  | 947.5   | 37.1913  | 7.87151  | -2.24025 | Down | 0        | 0        |
| Mageh1       | 1280 | 139.5   | 31.5    | 3.888389 | 0.82409  | -2.2383  | Down | 9.57E-18 | 4.19E-17 |
| Tuba1a       | 1617 | 41343.5 | 9421    | 915.3899 | 194.2529 | -2.23645 | Down | 0        | 0        |
| LOC683470    | 3158 | 73.5    | 17      | 0.837094 | 0.177731 | -2.23569 | Down | 1.19E-09 | 2.86E-09 |
| Tmem132a     | 3066 | 6189    | 1412    | 72.36955 | 15.37491 | -2.2348  | Down | 0        | 0        |

|              |      |         |        |          |          |          |      |          |          |
|--------------|------|---------|--------|----------|----------|----------|------|----------|----------|
| Sema3f       | 3485 | 1743.5  | 398    | 17.95215 | 3.815481 | -2.23422 | Down | #####    | #####    |
| Pddc1        | 1098 | 236     | 54     | 7.705215 | 1.638696 | -2.23329 | Down | 1.66E-28 | 8.11E-28 |
| Fhod1        | 3713 | 3797.5  | 867    | 36.66268 | 7.800557 | -2.23266 | Down | 0        | 0        |
| 6-Sep        | 2088 | 285     | 65     | 4.882283 | 1.039771 | -2.23129 | Down | 3.40E-34 | 1.75E-33 |
| St3gal2      | 3221 | 4304    | 983.5  | 47.82535 | 10.1886  | -2.23082 | Down | 0        | 0        |
| Mcm3         | 2918 | 4518.5  | 1032.5 | 55.44042 | 11.81338 | -2.23052 | Down | 0        | 0        |
| Chst12       | 1634 | 928     | 214.5  | 20.43964 | 4.356071 | -2.23027 | Down | #####    | #####    |
| Peg12        | 2604 | 242     | 55     | 3.321954 | 0.708977 | -2.22822 | Down | 2.36E-29 | 1.17E-28 |
| Pycr1        | 930  | 397     | 91     | 15.29926 | 3.267849 | -2.22705 | Down | 8.33E-47 | 4.67E-46 |
| LOC685707    | 9398 | 11439.5 | 2627.5 | 43.61615 | 9.338764 | -2.22356 | Down | 0        | 0        |
| Aqp1         | 2623 | 3911.5  | 898.5  | 53.31309 | 11.43122 | -2.22151 | Down | 0        | 0        |
| Siat7F       | 2243 | 841.5   | 194    | 13.4417  | 2.885261 | -2.21994 | Down | 1.04E-96 | 7.28E-96 |
| Igfbp4       | 2194 | 16782   | 3861.5 | 273.6999 | 58.78816 | -2.219   | Down | 0        | 0        |
| Cables1      | 2600 | 153     | 35     | 2.105706 | 0.452553 | -2.21814 | Down | 5.24E-19 | 2.32E-18 |
| Cnpy3        | 1814 | 2563    | 592.5  | 50.64979 | 10.89335 | -2.21711 | Down | #####    | #####    |
| Mmp15        | 3818 | 3162.5  | 731    | 29.73502 | 6.397475 | -2.21659 | Down | 0        | 0        |
| Dpysl2       | 4370 | 11890   | 2745   | 97.28481 | 20.98211 | -2.21306 | Down | 0        | 0        |
| F2rl1        | 3011 | 538     | 124    | 6.380733 | 1.37674  | -2.21247 | Down | 1.52E-62 | 9.37E-62 |
| LOC100912604 | 1251 | 1936.5  | 448.5  | 55.54165 | 11.98436 | -2.21242 | Down | #####    | #####    |
| Cckbr        | 2152 | 506.5   | 117    | 8.409372 | 1.814757 | -2.21222 | Down | 9.15E-59 | 5.52E-58 |
| RGD1564836   | 276  | 348.5   | 81.5   | 45.58069 | 9.853895 | -2.20966 | Down | 1.05E-40 | 5.67E-40 |
| LOC100911751 | 774  | 29.5    | 7      | 1.367165 | 0.296134 | -2.20687 | Down | 0.000191 | 0.000347 |
| Dapk1        | 5878 | 1549.5  | 360    | 9.442235 | 2.047848 | -2.20502 | Down | #####    | #####    |
| LOC100911830 | 1820 | 423.5   | 99.5   | 8.287256 | 1.807218 | -2.19712 | Down | 6.77E-49 | 3.84E-48 |
| Pik3r2       | 3137 | 2913.5  | 684    | 33.32914 | 7.274587 | -2.19585 | Down | 0        | 0        |

|            |       |        |        |          |          |          |      |          |          |
|------------|-------|--------|--------|----------|----------|----------|------|----------|----------|
| Pcdh20     | 5179  | 453    | 105.5  | 3.120056 | 0.681765 | -2.19423 | Down | 1.12E-52 | 6.49E-52 |
| Hspa8      | 2130  | 19738  | 4641.5 | 332.1669 | 72.74945 | -2.1909  | Down | 0        | 0        |
| Duox1      | 5212  | 304.5  | 72     | 2.090614 | 0.458452 | -2.18909 | Down | 3.07E-35 | 1.60E-34 |
| Nup210     | 6941  | 1422.5 | 335    | 7.339465 | 1.611768 | -2.18703 | Down | #####    | #####    |
| Ptgrn      | 5825  | 2035   | 479.5  | 12.50129 | 2.749635 | -2.18476 | Down | #####    | #####    |
| Dpysl3     | 1792  | 10113  | 2389.5 | 202.2478 | 44.56883 | -2.18202 | Down | 0        | 0        |
| Ptrf       | 1393  | 7931.5 | 1880.5 | 203.9133 | 45.01317 | -2.17954 | Down | 0        | 0        |
| RGD1359378 | 1567  | 166.5  | 39.5   | 3.817664 | 0.843031 | -2.17903 | Down | 4.61E-20 | 2.07E-19 |
| Inpp5j     | 3322  | 113.5  | 27     | 1.226287 | 0.270814 | -2.17892 | Down | 6.40E-14 | 2.52E-13 |
| Flna       | 8412  | 56285  | 13326  | 239.2271 | 52.86145 | -2.17809 | Down | 0        | 0        |
| RGD1562342 | 2646  | 909.5  | 216    | 12.30278 | 2.719331 | -2.17766 | Down | #####    | #####    |
| Rnf213     | 15614 | 2229.5 | 528    | 5.096673 | 1.127273 | -2.17672 | Down | #####    | #####    |
| Git1       | 3236  | 4424   | 1050.5 | 49.00751 | 10.84237 | -2.17632 | Down | 0        | 0        |
| Mrf        | 5531  | 992    | 237    | 6.433372 | 1.425886 | -2.17372 | Down | #####    | #####    |
| LOC498045  | 1941  | 4600   | 1095.5 | 84.97655 | 18.83679 | -2.17351 | Down | 0        | 0        |
| Igsf3      | 6569  | 3578   | 849.5  | 19.47102 | 4.320102 | -2.17219 | Down | 0        | 0        |
| Sgsm2      | 4712  | 968    | 230.5  | 7.353245 | 1.634446 | -2.16958 | Down | #####    | #####    |
| lpo4       | 3717  | 5724   | 1367.5 | 55.15705 | 12.28932 | -2.16614 | Down | 0        | 0        |
| Mex3a      | 1362  | 108    | 26     | 2.855962 | 0.638662 | -2.16085 | Down | 2.77E-13 | 9.84E-13 |
| LOC680121  | 2109  | 30423  | 7313   | 517.022  | 115.7562 | -2.15914 | Down | 0        | 0        |
| Anxa6      | 2625  | 18402  | 4419   | 251.1139 | 56.28729 | -2.15746 | Down | 0        | 0        |
| LOC688272  | 2279  | 357.5  | 86     | 5.618368 | 1.26067  | -2.15596 | Down | 1.67E-40 | 9.00E-40 |
| Heatr5a    | 7753  | 5985.5 | 1439.5 | 27.54211 | 6.192953 | -2.15294 | Down | 0        | 0        |
| Actr1b     | 3193  | 11318  | 2726.5 | 126.8451 | 28.52236 | -2.1529  | Down | 0        | 0        |
| Pcdha12    | 5250  | 55.5   | 13.5   | 0.377788 | 0.08508  | -2.15068 | Down | 1.68E-07 | 3.72E-07 |



|            |      |         |        |          |          |          |      |          |          |
|------------|------|---------|--------|----------|----------|----------|------|----------|----------|
| Lrrk1      | 6445 | 2071    | 501    | 11.50603 | 2.593079 | -2.14965 | Down | #####    | #####    |
| Mvk        | 1723 | 1630    | 394.5  | 33.86379 | 7.637752 | -2.14852 | Down | #####    | #####    |
| Mapk10     | 2759 | 33      | 8      | 0.428622 | 0.096808 | -2.1465  | Down | 6.88E-05 | 0.00013  |
| Rnase4     | 1360 | 207.5   | 50     | 5.451352 | 1.231427 | -2.14628 | Down | 4.39E-24 | 2.06E-23 |
| Akap12     | 6255 | 7377.5  | 1787.5 | 42.19876 | 9.539772 | -2.14517 | Down | 0        | 0        |
| Gpt2       | 1769 | 967.5   | 235.5  | 19.63553 | 4.442365 | -2.14407 | Down | #####    | #####    |
| Hapln4     | 3687 | 2535    | 617.5  | 24.67278 | 5.585654 | -2.14312 | Down | #####    | #####    |
| Mpnd       | 1566 | 1600.5  | 388.5  | 36.5538  | 8.277284 | -2.14279 | Down | #####    | #####    |
| Dbc1       | 2420 | 643     | 156    | 9.531389 | 2.159646 | -2.14189 | Down | 3.72E-71 | 2.38E-70 |
| Mboat1     | 2853 | 1827    | 443.5  | 22.90497 | 5.197722 | -2.13971 | Down | #####    | #####    |
| Gpc1       | 3509 | 16455.5 | 4008.5 | 167.8653 | 38.1218  | -2.13862 | Down | 0        | 0        |
| Maged1     | 2695 | 9218.5  | 2253   | 122.6319 | 27.8607  | -2.13803 | Down | 0        | 0        |
| Slc29a1    | 2142 | 1105    | 269.5  | 18.42989 | 4.191594 | -2.13648 | Down | #####    | #####    |
| RGD1304563 | 5071 | 2244.5  | 546.5  | 15.83418 | 3.602434 | -2.136   | Down | #####    | #####    |
| Acsf2      | 3095 | 633     | 154    | 7.331108 | 1.668229 | -2.13571 | Down | 6.66E-70 | 4.25E-69 |
| Kif20a     | 2949 | 7563    | 1845   | 91.83884 | 20.9124  | -2.13475 | Down | 0        | 0        |
| Hmgcs1     | 3275 | 13603.5 | 3321.5 | 148.588  | 33.87501 | -2.13302 | Down | 0        | 0        |
| RGD1565297 | 813  | 33      | 8      | 1.434823 | 0.32853  | -2.12678 | Down | 6.88E-05 | 0.00013  |
| Hip1       | 7376 | 5408    | 1330   | 26.26191 | 6.014758 | -2.12639 | Down | 0        | 0        |
| Clip2      | 4847 | 4535    | 1115   | 33.4975  | 7.672848 | -2.12622 | Down | 0        | 0        |
| Tk1        | 2263 | 4686    | 1152.5 | 74.12963 | 16.98115 | -2.12612 | Down | 0        | 0        |
| RGD1311422 | 3215 | 2134.5  | 525    | 23.7965  | 5.452248 | -2.12583 | Down | #####    | #####    |
| Lat2       | 615  | 28      | 7      | 1.639412 | 0.375622 | -2.12582 | Down | 0.000313 | 0.00056  |
| LOC680835  | 6031 | 2286.5  | 561.5  | 13.56968 | 3.10921  | -2.12577 | Down | #####    | #####    |
| Mki67      | 8791 | 21552.5 | 5290   | 87.67299 | 20.09457 | -2.12533 | Down | 0        | 0        |

|           |       |         |        |          |          |          |      |          |          |
|-----------|-------|---------|--------|----------|----------|----------|------|----------|----------|
| Slc6a6    | 2489  | 3377    | 828    | 48.43994 | 11.11273 | -2.12398 | Down | 0        | 0        |
| LOC499229 | 7308  | 159     | 39     | 0.776887 | 0.178542 | -2.12144 | Down | 1.34E-18 | 5.93E-18 |
| LOC689955 | 2113  | 24482.5 | 6049   | 415.1502 | 95.59485 | -2.11863 | Down | 0        | 0        |
| Ide       | 4276  | 4312    | 1066   | 36.05875 | 8.318648 | -2.11593 | Down | 0        | 0        |
| Foxa1     | 2189  | 24      | 6      | 0.392324 | 0.09069  | -2.11303 | Down | 0.000878 | 0.001499 |
| Palm      | 2571  | 1930    | 478.5  | 26.96349 | 6.236695 | -2.11215 | Down | #####    | #####    |
| Fam173a   | 861   | 416     | 103.5  | 17.26102 | 3.99824  | -2.11008 | Down | 8.56E-46 | 4.77E-45 |
| Tbc1d2b   | 5706  | 1831    | 455    | 11.47737 | 2.661181 | -2.10865 | Down | #####    | #####    |
| Flot1     | 1718  | 3335    | 832.5  | 69.67708 | 16.15615 | -2.1086  | Down | 0        | 0        |
| Mapk3     | 1875  | 9628.5  | 2404.5 | 184.3062 | 42.82989 | -2.10542 | Down | 0        | 0        |
| Sbf1      | 6155  | 7580.5  | 1901   | 44.16507 | 10.30567 | -2.09947 | Down | 0        | 0        |
| Apoa5     | 1850  | 34      | 8.5    | 0.662597 | 0.154615 | -2.09945 | Down | 4.19E-05 | 8.09E-05 |
| Odz4      | 8565  | 304     | 76     | 1.270198 | 0.296462 | -2.09913 | Down | 1.32E-33 | 6.75E-33 |
| Msto1     | 1972  | 741     | 186    | 13.48344 | 3.148604 | -2.0984  | Down | 3.16E-79 | 2.10E-78 |
| Esyt1     | 3820  | 3442    | 863    | 32.24643 | 7.536026 | -2.09726 | Down | 0        | 0        |
| Mov10     | 3781  | 1554.5  | 390    | 14.73865 | 3.444474 | -2.09725 | Down | #####    | #####    |
| Evc       | 4315  | 898     | 226    | 7.453006 | 1.74406  | -2.09537 | Down | 2.13E-95 | 1.49E-94 |
| Acaa1a    | 1619  | 516     | 129.5  | 11.40679 | 2.67637  | -2.09154 | Down | 6.65E-56 | 3.94E-55 |
| Pnmal2    | 2575  | 24      | 6      | 0.334404 | 0.078494 | -2.09095 | Down | 0.000878 | 0.001499 |
| Lhx1      | 1938  | 210     | 53     | 3.884246 | 0.913055 | -2.08886 | Down | 1.71E-23 | 7.96E-23 |
| Tmem119   | 2167  | 7620.5  | 1925.5 | 126.0095 | 29.68078 | -2.08593 | Down | 0        | 0        |
| Fry       | 10792 | 1042    | 264    | 3.457848 | 0.815393 | -2.08431 | Down | #####    | #####    |
| Btbd6     | 2147  | 853     | 216    | 14.22277 | 3.358058 | -2.0825  | Down | 3.48E-90 | 2.40E-89 |
| Ankrd52   | 3387  | 2685.5  | 684    | 28.4154  | 6.71319  | -2.0816  | Down | #####    | #####    |
| Nut       | 3688  | 44      | 11     | 0.426604 | 0.100801 | -2.08138 | Down | 5.38E-06 | 1.09E-05 |

|              |       |         |        |          |          |          |      |          |          |
|--------------|-------|---------|--------|----------|----------|----------|------|----------|----------|
| Fam131b      | 4046  | 498.5   | 126    | 4.409422 | 1.042397 | -2.08068 | Down | 2.03E-53 | 1.19E-52 |
| Efh2         | 2135  | 4846.5  | 1234   | 81.50959 | 19.29416 | -2.07881 | Down | 0        | 0        |
| Adprh1       | 1545  | 50      | 12.5   | 1.15692  | 0.273906 | -2.07853 | Down | 7.46E-07 | 1.60E-06 |
| Emilin1      | 3836  | 5885    | 1493.5 | 54.93647 | 13.00661 | -2.07852 | Down | 0        | 0        |
| LOC100912447 | 7288  | 371     | 94     | 1.819521 | 0.430867 | -2.07824 | Down | 3.64E-40 | 1.96E-39 |
| Il17rc       | 2322  | 631     | 160.5  | 9.735153 | 2.306    | -2.07781 | Down | 4.34E-67 | 2.72E-66 |
| Olr1735      | 927   | 58.5    | 15     | 2.266516 | 0.537327 | -2.0766  | Down | 2.55E-07 | 5.60E-07 |
| Tle2         | 2431  | 118     | 30     | 1.740681 | 0.412754 | -2.0763  | Down | 9.58E-14 | 3.71E-13 |
| Odz3         | 10972 | 2478.5  | 631    | 8.082953 | 1.920158 | -2.07366 | Down | #####    | #####    |
| Pcdha6       | 5289  | 51      | 13     | 0.344286 | 0.081892 | -2.07181 | Down | 1.17E-06 | 2.48E-06 |
| Mgat4b       | 2395  | 2279.5  | 584    | 34.04668 | 8.105008 | -2.07063 | Down | #####    | #####    |
| Kremen1      | 2045  | 619.5   | 158    | 10.84122 | 2.58304  | -2.06939 | Down | 1.94E-65 | 1.21E-64 |
| Aspm         | 9727  | 4837.5  | 1233   | 17.76847 | 4.234074 | -2.0692  | Down | 0        | 0        |
| Timp3        | 1778  | 5927    | 1517.5 | 119.4912 | 28.49243 | -2.06825 | Down | 0        | 0        |
| Scd          | 5055  | 84875.5 | 21710  | 600.0514 | 143.42   | -2.06484 | Down | 0        | 0        |
| Afap112      | 3205  | 868.5   | 222    | 9.704067 | 2.32046  | -2.06418 | Down | 7.08E-91 | 4.90E-90 |
| Pde6d        | 1081  | 757.5   | 194.5  | 25.10631 | 6.006739 | -2.0634  | Down | 2.48E-79 | 1.65E-78 |
| LOC100909828 | 552   | 91      | 23.5   | 5.938523 | 1.422174 | -2.06201 | Down | 5.79E-11 | 1.45E-10 |
| Sod3         | 1729  | 13465   | 3466   | 279.63   | 66.98745 | -2.06156 | Down | 0        | 0        |
| Sfxn5        | 1083  | 93      | 24     | 3.080741 | 0.738212 | -2.06117 | Down | 5.56E-11 | 1.39E-10 |
| Pou5f1       | 1388  | 46.5    | 12     | 1.204367 | 0.288647 | -2.0609  | Down | 5.13E-06 | 1.05E-05 |
| Pcolce       | 1547  | 8574.5  | 2214   | 198.805  | 47.73057 | -2.05837 | Down | 0        | 0        |
| Med16        | 2942  | 1931.5  | 499    | 23.5666  | 5.658844 | -2.05816 | Down | #####    | #####    |
| Myo5a        | 5620  | 5517.5  | 1420   | 35.10882 | 8.435013 | -2.05737 | Down | 0        | 0        |
| Cacna1e      | 6973  | 89.5    | 23.5   | 0.465741 | 0.111937 | -2.05684 | Down | 1.49E-10 | 3.67E-10 |

|              |      |         |        |          |          |          |      |          |          |
|--------------|------|---------|--------|----------|----------|----------|------|----------|----------|
| Fzd1         | 4399 | 6773    | 1749   | 55.20445 | 13.2708  | -2.05653 | Down | 0        | 0        |
| Aldh2        | 1889 | 3454.5  | 892.5  | 65.48259 | 15.756   | -2.05521 | Down | 0        | 0        |
| LOC684969    | 1887 | 33154.5 | 8564   | 628.9089 | 151.3961 | -2.05452 | Down | 0        | 0        |
| Khdrbs1      | 2655 | 6954    | 1794   | 93.59267 | 22.54137 | -2.05382 | Down | 0        | 0        |
| Kcnab2       | 1590 | 50.5    | 13     | 1.13561  | 0.27354  | -2.05364 | Down | 1.88E-06 | 3.94E-06 |
| Leprel4      | 1407 | 4346.5  | 1125   | 110.7825 | 26.70737 | -2.05242 | Down | 0        | 0        |
| LOC688655    | 2027 | 2576.5  | 665.5  | 45.41879 | 10.96392 | -2.05053 | Down | #####    | #####    |
| Alk          | 6375 | 125     | 32.5   | 0.701542 | 0.169572 | -2.04863 | Down | 2.16E-14 | 8.85E-14 |
| LOC100911721 | 2309 | 385.5   | 100    | 5.986249 | 1.447112 | -2.04848 | Down | 1.16E-40 | 6.23E-40 |
| LOC688932    | 2083 | 10016   | 2594.5 | 172.093  | 41.63775 | -2.04722 | Down | 0        | 0        |
| LOC100911378 | 1426 | 483     | 125    | 12.12978 | 2.934819 | -2.04721 | Down | 9.07E-51 | 5.20E-50 |
| Ptprz1       | 7871 | 7234    | 1874   | 32.84781 | 7.950868 | -2.04661 | Down | 0        | 0        |
| Zmiz2        | 4385 | 2225.5  | 579    | 18.22728 | 4.415614 | -2.04541 | Down | #####    | #####    |
| Afap111      | 3436 | 1047.5  | 273.5  | 10.92499 | 2.648761 | -2.04424 | Down | #####    | #####    |
| Fkbp4        | 2845 | 8646.5  | 2252   | 108.9191 | 26.41926 | -2.04359 | Down | 0        | 0        |
| Glt25d1      | 3039 | 4415    | 1152   | 52.0399  | 12.63202 | -2.04253 | Down | 0        | 0        |
| Vat1         | 2628 | 1640    | 426.5  | 22.35645 | 5.431555 | -2.04125 | Down | #####    | #####    |
| Capn1        | 3020 | 2675    | 697.5  | 31.74345 | 7.719819 | -2.03982 | Down | #####    | #####    |
| Atoh8        | 2375 | 1754.5  | 458.5  | 26.54413 | 6.456212 | -2.03963 | Down | #####    | #####    |
| Clec1a       | 3299 | 92      | 24     | 0.997374 | 0.242887 | -2.03785 | Down | 8.89E-11 | 2.21E-10 |
| Fam123b      | 3663 | 385.5   | 101    | 3.759545 | 0.918364 | -2.03342 | Down | 2.80E-40 | 1.50E-39 |
| LOC100911911 | 3422 | 3184    | 835.5  | 33.37545 | 8.161436 | -2.03189 | Down | 0        | 0        |
| C1q3         | 768  | 90      | 24     | 4.208281 | 1.029275 | -2.0316  | Down | 2.26E-10 | 5.54E-10 |
| Gusb         | 2483 | 1654.5  | 433.5  | 23.83805 | 5.834166 | -2.03067 | Down | #####    | #####    |
| Hmx3         | 1362 | 79.5    | 21     | 2.097721 | 0.513453 | -2.03052 | Down | 2.73E-09 | 6.46E-09 |

|            |       |        |        |          |          |          |      |          |          |
|------------|-------|--------|--------|----------|----------|----------|------|----------|----------|
| Itpr3      | 8806  | 8041.5 | 2117   | 32.71422 | 8.019075 | -2.02841 | Down | 0        | 0        |
| RGD1305592 | 1594  | 705.5  | 186.5  | 15.86796 | 3.894159 | -2.02673 | Down | 5.90E-72 | 3.80E-71 |
| Lphn1      | 5579  | 4898   | 1291.5 | 31.48063 | 7.73164  | -2.02562 | Down | 0        | 0        |
| Susd4      | 2121  | 197    | 52     | 3.331954 | 0.819384 | -2.02376 | Down | 3.02E-21 | 1.38E-20 |
| Ccnjl      | 2990  | 34     | 9      | 0.407283 | 0.100194 | -2.02323 | Down | 0.000106 | 0.000197 |
| Megf10     | 4054  | 6512.5 | 1719   | 57.48263 | 14.14976 | -2.02235 | Down | 0        | 0        |
| 5-Sep      | 3666  | 2265.5 | 600.5  | 22.17536 | 5.461847 | -2.0215  | Down | #####    | #####    |
| Coro7      | 3499  | 991    | 262.5  | 10.15482 | 2.502283 | -2.02085 | Down | #####    | 2.32E-99 |
| Cad        | 7126  | 4616   | 1218.5 | 23.17427 | 5.712024 | -2.02045 | Down | 0        | 0        |
| Foxp4      | 3401  | 3298   | 877    | 34.87252 | 8.601892 | -2.01936 | Down | 0        | 0        |
| Adamtsl4   | 4180  | 815    | 216    | 6.982773 | 1.723098 | -2.0188  | Down | 1.56E-82 | 1.05E-81 |
| Col6a3     | 10811 | 2081   | 551.5  | 6.881147 | 1.700035 | -2.01708 | Down | #####    | #####    |
| Olr1273    | 936   | 26     | 7      | 0.994591 | 0.245841 | -2.01638 | Down | 0.000821 | 0.001408 |
| Pop5       | 1439  | 646.5  | 172    | 16.11042 | 3.98251  | -2.01624 | Down | 1.73E-65 | 1.08E-64 |
| Slc22a25   | 2595  | 20.5   | 5.5    | 0.283896 | 0.070242 | -2.01496 | Down | 0.002494 | 0.004103 |
| Pkd1       | 13813 | 3362   | 892    | 8.709338 | 2.157123 | -2.01345 | Down | 0        | 0        |
| Calm3      | 599   | 2899   | 772.5  | 173.5996 | 43.02498 | -2.01252 | Down | #####    | #####    |
| Pip4k2b    | 1987  | 1811   | 482    | 32.63073 | 8.090711 | -2.01189 | Down | #####    | #####    |
| Vom1r85    | 909   | 69.5   | 18.5   | 2.73811  | 0.678995 | -2.01171 | Down | 2.08E-08 | 4.77E-08 |
| Cxxc5      | 2081  | 4578.5 | 1224   | 78.9585  | 19.58508 | -2.01134 | Down | 0        | 0        |
| Cdkn2d     | 1234  | 953.5  | 253.5  | 27.65424 | 6.85973  | -2.01128 | Down | 4.83E-96 | 3.38E-95 |
| Exd2       | 3197  | 1521.5 | 404.5  | 16.99489 | 4.216802 | -2.01088 | Down | #####    | #####    |
| Dync1h1    | 14279 | 20878  | 5548   | 52.23208 | 12.97453 | -2.00925 | Down | 0        | 0        |
| Vash1      | 3022  | 845    | 225.5  | 10.01525 | 2.495326 | -2.0049  | Down | 4.13E-85 | 2.81E-84 |
| Atp5d      | 811   | 4838   | 1296   | 213.9632 | 53.32418 | -2.0045  | Down | 0        | 0        |

|              |      |         |        |          |          |          |      |          |          |
|--------------|------|---------|--------|----------|----------|----------|------|----------|----------|
| LOC100360260 | 1293 | 976.5   | 260    | 26.95926 | 6.721865 | -2.00385 | Down | 5.58E-98 | 3.94E-97 |
| Lrp4         | 7784 | 2192.5  | 585.5  | 10.0799  | 2.514482 | -2.00315 | Down | #####    | #####    |
| Bub3         | 1364 | 2526.5  | 673.5  | 66.13926 | 16.51141 | -2.00204 | Down | #####    | #####    |
| Pdgfra       | 6532 | 4541.5  | 1213.5 | 24.86367 | 6.208244 | -2.00178 | Down | 0        | 0        |
| Flot2        | 2562 | 1537    | 411    | 21.47923 | 5.366503 | -2.00089 | Down | #####    | #####    |
| L3mbtl3      | 2532 | 318     | 85     | 4.490026 | 1.121872 | -2.00082 | Down | 5.94E-33 | 3.03E-32 |
| Pcdha8       | 5247 | 37.5    | 10     | 0.254484 | 0.06363  | -1.99979 | Down | 6.17E-05 | 0.000117 |
| Camk1        | 1439 | 679     | 183    | 16.91281 | 4.228968 | -1.99974 | Down | 6.48E-68 | 4.09E-67 |
| Sox10        | 3029 | 4913.5  | 1319.5 | 58.17545 | 14.55281 | -1.99911 | Down | 0        | 0        |
| Hspa2        | 2501 | 370.5   | 100    | 5.309094 | 1.329181 | -1.99793 | Down | 1.14E-37 | 6.05E-37 |
| LOC685179    | 4496 | 5019.5  | 1351   | 40.00271 | 10.02337 | -1.99673 | Down | 0        | 0        |
| Csrp1        | 1720 | 11449.5 | 3075   | 238.1349 | 59.7148  | -1.99562 | Down | 0        | 0        |
| Chrna4       | 2149 | 533.5   | 145.5  | 8.949142 | 2.246035 | -1.99437 | Down | 3.51E-53 | 2.04E-52 |
| Daam2        | 3299 | 355.5   | 96     | 3.862517 | 0.96991  | -1.99362 | Down | 3.47E-36 | 1.81E-35 |
| Txndc5       | 2631 | 9745    | 2624.5 | 132.467  | 33.29458 | -1.99227 | Down | 0        | 0        |
| Myo1c        | 3810 | 11775.5 | 3174.5 | 110.7414 | 27.84454 | -1.99173 | Down | 0        | 0        |
| Zfp161       | 1350 | 203     | 55     | 5.390932 | 1.355537 | -1.99167 | Down | 2.57E-21 | 1.17E-20 |
| LOC100911345 | 3988 | 81.5    | 22     | 0.733362 | 0.184631 | -1.98988 | Down | 2.57E-09 | 6.09E-09 |
| Kcnab1       | 3522 | 665.5   | 179.5  | 6.735782 | 1.696588 | -1.98921 | Down | 1.23E-66 | 7.72E-66 |
| Klhl34       | 2329 | 67      | 18     | 1.029648 | 0.25958  | -1.9879  | Down | 5.29E-08 | 1.19E-07 |
| RGD1561333   | 840  | 1276    | 346.5  | 54.5742  | 13.77688 | -1.98597 | Down | #####    | #####    |
| LOC690422    | 1647 | 894.5   | 241.5  | 19.39432 | 4.90344  | -1.98377 | Down | 7.77E-89 | 5.34E-88 |
| Fstl1        | 2283 | 27609.5 | 7477   | 432.5712 | 109.3925 | -1.98342 | Down | 0        | 0        |
| RGD1307929   | 7456 | 10848.5 | 2938   | 52.04428 | 13.16448 | -1.98309 | Down | 0        | 0        |
| LOC100909788 | 1333 | 7619    | 2062   | 204.2618 | 51.676   | -1.98285 | Down | 0        | 0        |

|              |      |         |        |          |          |          |      |          |          |
|--------------|------|---------|--------|----------|----------|----------|------|----------|----------|
| Slc44a2      | 3453 | 2144    | 581    | 22.2027  | 5.617126 | -1.98283 | Down | #####    | #####    |
| Ung          | 1855 | 1181.5  | 321.5  | 22.82918 | 5.777957 | -1.98225 | Down | #####    | #####    |
| Fam108c1     | 2208 | 1345    | 365    | 21.8038  | 5.523182 | -1.98101 | Down | #####    | #####    |
| Sh3pxd2a     | 3373 | 4125.5  | 1122   | 43.78543 | 11.09197 | -1.98094 | Down | 0        | 0        |
| Gucy1a3      | 2666 | 53.5    | 14.5   | 0.723781 | 0.183443 | -1.98022 | Down | 1.11E-06 | 2.35E-06 |
| LOC100361457 | 1919 | 45824.5 | 12471  | 854.7132 | 216.6636 | -1.97998 | Down | 0        | 0        |
| Rgl2         | 2894 | 1494.5  | 407.5  | 18.47507 | 4.688865 | -1.97827 | Down | #####    | #####    |
| LOC684035    | 3163 | 1775    | 484.5  | 20.15521 | 5.116522 | -1.97792 | Down | #####    | #####    |
| Cdk5         | 1178 | 1208.5  | 329    | 36.69535 | 9.32068  | -1.97709 | Down | #####    | #####    |
| Nov          | 1475 | 413     | 112.5  | 10.01231 | 2.545536 | -1.97573 | Down | 1.03E-41 | 5.58E-41 |
| G6pd         | 2408 | 5638.5  | 1541.5 | 83.91336 | 21.36143 | -1.97389 | Down | 0        | 0        |
| Chd1l        | 2999 | 189     | 52     | 2.257964 | 0.575897 | -1.97114 | Down | 1.18E-19 | 5.26E-19 |
| Srm          | 1265 | 1330    | 363.5  | 37.70349 | 9.619018 | -1.97074 | Down | #####    | #####    |
| Slc48a1      | 1572 | 1975    | 542    | 45.02634 | 11.49634 | -1.96959 | Down | #####    | #####    |
| Crocc        | 6308 | 417     | 114.5  | 2.374505 | 0.606522 | -1.969   | Down | 9.14E-42 | 4.98E-41 |
| Cimp         | 3925 | 1454    | 397.5  | 13.2556  | 3.385913 | -1.96899 | Down | #####    | #####    |
| Slc29a2      | 1678 | 148     | 41     | 3.171126 | 0.810405 | -1.96828 | Down | 1.33E-15 | 5.63E-15 |
| Timm22       | 1145 | 800     | 219.5  | 24.99838 | 6.388956 | -1.96818 | Down | 1.89E-78 | 1.25E-77 |
| Fgd1         | 3684 | 1034    | 283.5  | 10.05367 | 2.57256  | -1.96645 | Down | #####    | #####    |
| LOC688318    | 890  | 1122.5  | 309.5  | 45.17137 | 11.56434 | -1.96573 | Down | #####    | #####    |
| Preb         | 2024 | 1098.5  | 302    | 19.42726 | 4.978961 | -1.96417 | Down | #####    | #####    |
| Pcdhgc3      | 4614 | 7541    | 2076   | 58.56781 | 15.01409 | -1.96379 | Down | 0        | 0        |
| Ccdc74a      | 1269 | 58      | 16     | 1.630964 | 0.418116 | -1.96375 | Down | 6.11E-07 | 1.31E-06 |
| Epn1         | 2047 | 2314.5  | 638.5  | 40.58499 | 10.41423 | -1.96239 | Down | #####    | #####    |
| Sort1        | 6690 | 501.5   | 138    | 2.67902  | 0.68762  | -1.96202 | Down | 1.83E-49 | 1.04E-48 |

|              |      |         |         |          |          |          |      |          |          |
|--------------|------|---------|---------|----------|----------|----------|------|----------|----------|
| Adamtsl3     | 7268 | 5852    | 1610    | 28.77454 | 7.390859 | -1.96098 | Down | 0        | 0        |
| Tmem104      | 1976 | 683     | 189     | 12.398   | 3.18472  | -1.96087 | Down | 1.71E-66 | 1.07E-65 |
| Wdr34        | 1882 | 493.5   | 136     | 9.393629 | 2.414084 | -1.96021 | Down | 1.26E-48 | 7.12E-48 |
| Cerk         | 4319 | 2985    | 824     | 24.7563  | 6.368241 | -1.95883 | Down | #####    | #####    |
| Ehd2         | 2057 | 4484    | 1239    | 78.11945 | 20.10693 | -1.95799 | Down | 0        | 0        |
| Recql4       | 3860 | 799.5   | 220.5   | 7.412693 | 1.909182 | -1.95704 | Down | 6.90E-78 | 4.56E-77 |
| Tln2         | 8647 | 4908    | 1355.5  | 20.30252 | 5.231673 | -1.95631 | Down | 0        | 0        |
| Gpsm3        | 1259 | 122     | 34      | 3.487518 | 0.9002   | -1.95388 | Down | 4.91E-13 | 1.65E-12 |
| Mmp16        | 3519 | 871.5   | 241     | 8.847007 | 2.284718 | -1.95317 | Down | 2.57E-84 | 1.74E-83 |
| Hsp90ab1     | 2338 | 71767   | 19863   | 1098.344 | 283.6613 | -1.95309 | Down | 0        | 0        |
| Kifc1        | 2316 | 3331    | 923     | 51.56571 | 13.32786 | -1.95197 | Down | 0        | 0        |
| Immt         | 1938 | 3787.5  | 1048.5  | 69.83136 | 18.06647 | -1.95056 | Down | 0        | 0        |
| Mypop        | 1866 | 395.5   | 110     | 7.616702 | 1.973928 | -1.9481  | Down | 6.50E-39 | 3.47E-38 |
| LOC686298    | 1826 | 262.5   | 73      | 5.149894 | 1.335234 | -1.94745 | Down | 2.49E-26 | 1.20E-25 |
| Antxr1       | 3384 | 469     | 130.5   | 4.964403 | 1.287922 | -1.94657 | Down | 4.09E-46 | 2.28E-45 |
| Spon2        | 1773 | 1950.5  | 541     | 39.33147 | 10.20466 | -1.94646 | Down | #####    | #####    |
| Spag11b      | 336  | 22      | 6       | 2.33783  | 0.606908 | -1.94562 | Down | 0.002316 | 0.003824 |
| Usp1         | 3563 | 4088    | 1136    | 40.96778 | 10.63975 | -1.94503 | Down | 0        | 0        |
| RGD1309823   | 2079 | 811.5   | 228     | 13.9923  | 3.634628 | -1.94475 | Down | 2.48E-77 | 1.63E-76 |
| Tmem50b      | 2289 | 500     | 138     | 7.777516 | 2.020306 | -1.94474 | Down | 2.87E-49 | 1.63E-48 |
| Ahcy         | 2029 | 4696.5  | 1309    | 82.90202 | 21.53491 | -1.94473 | Down | 0        | 0        |
| LOC100909925 | 624  | 46      | 13      | 2.647056 | 0.688347 | -1.94318 | Down | 1.21E-05 | 2.43E-05 |
| Actg1        | 1909 | 51482.5 | 14360.5 | 964.8233 | 250.9874 | -1.94265 | Down | 0        | 0        |
| Map2k2       | 1376 | 2687.5  | 751     | 70.0402  | 18.22463 | -1.94229 | Down | #####    | #####    |
| Mknk2        | 3458 | 4547    | 1272    | 47.15215 | 12.27329 | -1.9418  | Down | 0        | 0        |



|              |       |         |         |          |          |          |      |          |          |
|--------------|-------|---------|---------|----------|----------|----------|------|----------|----------|
| Nt5dc2       | 1822  | 1104    | 308.5   | 21.70848 | 5.652295 | -1.94135 | Down | #####    | #####    |
| B4galt2      | 2019  | 1263    | 354     | 22.43132 | 5.845384 | -1.94014 | Down | #####    | #####    |
| Cyp51        | 3046  | 27848   | 7779.5  | 327.1598 | 85.25931 | -1.94007 | Down | 0        | 0        |
| Clip3        | 2123  | 1469.5  | 411.5   | 24.8364  | 6.47368  | -1.9398  | Down | #####    | #####    |
| A3galt2      | 1936  | 682.5   | 191     | 12.62758 | 3.291519 | -1.93975 | Down | 1.41E-65 | 8.80E-65 |
| Kif3c        | 3419  | 4935.5  | 1380.5  | 51.73533 | 13.49188 | -1.93906 | Down | 0        | 0        |
| Ramp3        | 1234  | 64      | 18      | 1.872586 | 0.488462 | -1.93871 | Down | 2.11E-07 | 4.63E-07 |
| Actb         | 1293  | 184825  | 51866.5 | 5130.646 | 1338.845 | -1.93815 | Down | 0        | 0        |
| Gnai2        | 2218  | 27003.5 | 7571    | 436.5213 | 113.9142 | -1.9381  | Down | 0        | 0        |
| Adi1         | 1333  | 444     | 124.5   | 11.93084 | 3.116585 | -1.93666 | Down | 2.08E-43 | 1.14E-42 |
| Nacc1        | 2044  | 3677.5  | 1033    | 64.59257 | 16.87616 | -1.93638 | Down | 0        | 0        |
| Maged2       | 2112  | 1350.5  | 378     | 22.85779 | 5.976333 | -1.93535 | Down | #####    | #####    |
| Abi3         | 1708  | 35.5    | 10      | 0.743235 | 0.194419 | -1.93465 | Down | 0.000156 | 0.000285 |
| Prrx2        | 1230  | 53.5    | 15      | 1.558989 | 0.407888 | -1.93437 | Down | 2.61E-06 | 5.44E-06 |
| Tbx2         | 1234  | 132.5   | 37.5    | 3.862417 | 1.01058  | -1.93432 | Down | 6.51E-14 | 2.57E-13 |
| LOC100360453 | 1046  | 1828    | 511.5   | 62.31146 | 16.31128 | -1.93363 | Down | #####    | #####    |
| Tep1         | 8215  | 1980    | 556     | 8.617305 | 2.257464 | -1.93253 | Down | #####    | #####    |
| Uhrf1        | 2536  | 3899    | 1094.5  | 55.07885 | 14.43569 | -1.93186 | Down | 0        | 0        |
| Taldo1       | 1225  | 5702    | 1604.5  | 166.5979 | 43.6715  | -1.93161 | Down | 0        | 0        |
| Dlg5         | 7246  | 3189.5  | 896.5   | 15.76465 | 4.135016 | -1.93073 | Down | #####    | #####    |
| Col6a2       | 3626  | 39404.5 | 11116   | 389.7279 | 102.3737 | -1.92862 | Down | 0        | 0        |
| Sepr1        | 3203  | 7995    | 2257.5  | 89.49317 | 23.50811 | -1.92862 | Down | 0        | 0        |
| Lama5        | 11307 | 8267.5  | 2333    | 26.20473 | 6.886631 | -1.92796 | Down | 0        | 0        |
| Rab3a        | 1404  | 400     | 113     | 10.21262 | 2.685192 | -1.92726 | Down | 8.29E-39 | 4.42E-38 |
| Nefl         | 2032  | 409     | 115.5   | 7.206101 | 1.895732 | -1.92646 | Down | 7.73E-40 | 4.15E-39 |

|              |      |         |        |          |          |          |      |          |          |
|--------------|------|---------|--------|----------|----------|----------|------|----------|----------|
| Pkn1         | 3087 | 1579.5  | 445    | 18.32201 | 4.820095 | -1.92644 | Down | #####    | #####    |
| LOC100911010 | 336  | 25      | 7      | 2.65391  | 0.698237 | -1.92633 | Down | 0.001319 | 0.002222 |
| Pcdhga3      | 4712 | 609.5   | 172    | 4.631321 | 1.218513 | -1.9263  | Down | 3.17E-58 | 1.91E-57 |
| Tpm4         | 895  | 14849   | 4190   | 593.9695 | 156.3055 | -1.92602 | Down | 0        | 0        |
| Llgl1        | 3111 | 2496    | 706    | 28.77244 | 7.57351  | -1.92565 | Down | #####    | #####    |
| Ptprb        | 6539 | 70      | 20     | 0.383761 | 0.101015 | -1.92564 | Down | 7.25E-08 | 1.63E-07 |
| Nnt          | 4149 | 4809    | 1357   | 41.45415 | 10.9169  | -1.92495 | Down | 0        | 0        |
| Pycard       | 582  | 178.5   | 50     | 10.94963 | 2.889933 | -1.92177 | Down | 3.18E-18 | 1.40E-17 |
| Hdgf         | 1847 | 10200.5 | 2887   | 197.6288 | 52.16125 | -1.92174 | Down | 0        | 0        |
| Prrc2a       | 6664 | 27423   | 7795   | 147.7504 | 38.99845 | -1.92167 | Down | 0        | 0        |
| Pls1         | 1961 | 320.5   | 90.5   | 5.823303 | 1.537816 | -1.92096 | Down | 1.64E-31 | 8.25E-31 |
| Eya2         | 1596 | 382.5   | 109    | 8.611978 | 2.274538 | -1.92077 | Down | 9.48E-37 | 4.98E-36 |
| Fam176b      | 1102 | 825.5   | 234    | 26.81926 | 7.086129 | -1.9202  | Down | 6.70E-78 | 4.43E-77 |
| RGD1560015   | 1124 | 325     | 92.5   | 10.37464 | 2.741575 | -1.91998 | Down | 9.12E-32 | 4.59E-31 |
| Pcdhgb8      | 4714 | 687     | 195    | 5.219896 | 1.379556 | -1.91982 | Down | 4.08E-65 | 2.53E-64 |
| Pcbp4        | 2022 | 6146.5  | 1748.5 | 109.2086 | 28.8813  | -1.91888 | Down | 0        | 0        |
| LOC690976    | 854  | 6622.5  | 1880   | 277.9916 | 73.51898 | -1.91885 | Down | 0        | 0        |
| Sv2a         | 3554 | 1275    | 362    | 12.83887 | 3.400429 | -1.91673 | Down | #####    | #####    |
| LOC100911642 | 3167 | 591     | 168.5  | 6.682829 | 1.77279  | -1.91444 | Down | 3.60E-56 | 2.14E-55 |
| Thop1        | 2408 | 2503    | 714    | 37.26639 | 9.888365 | -1.91407 | Down | #####    | #####    |
| Sv2c         | 2622 | 94      | 27     | 1.287221 | 0.341741 | -1.91329 | Down | 4.56E-10 | 1.11E-09 |
| Spr          | 1219 | 1022.5  | 291.5  | 30.03787 | 7.983434 | -1.9117  | Down | 1.13E-95 | 7.94E-95 |
| Loxl3        | 2840 | 12666   | 3609   | 159.7638 | 42.47117 | -1.91139 | Down | 0        | 0        |
| Lypd2        | 545  | 23      | 6.5    | 1.524849 | 0.405623 | -1.91046 | Down | 0.001431 | 0.002404 |
| Mxd3         | 989  | 476     | 137    | 17.29068 | 4.603936 | -1.90906 | Down | 5.66E-45 | 3.14E-44 |

|              |       |         |         |          |          |          |      |          |          |
|--------------|-------|---------|---------|----------|----------|----------|------|----------|----------|
| Add1         | 3826  | 12905.5 | 3692.5  | 120.8599 | 32.20268 | -1.90808 | Down | 0        | 0        |
| Tubg1        | 1685  | 3810.5  | 1094    | 81.22889 | 21.65957 | -1.90699 | Down | 0        | 0        |
| Mras         | 3626  | 845     | 242     | 8.354551 | 2.227995 | -1.90682 | Down | 6.36E-79 | 4.23E-78 |
| Coro1c       | 3417  | 14141   | 4048    | 148.2818 | 39.54665 | -1.90671 | Down | 0        | 0        |
| Egflam       | 3714  | 395     | 112.5   | 3.797828 | 1.013373 | -1.90601 | Down | 3.39E-38 | 1.80E-37 |
| Tacr1        | 3408  | 150.5   | 43      | 1.577945 | 0.421254 | -1.90528 | Down | 2.82E-15 | 1.19E-14 |
| LOC100911769 | 4209  | 380.5   | 109.5   | 3.246643 | 0.867832 | -1.90346 | Down | 2.30E-36 | 1.21E-35 |
| Tubgcp2      | 2852  | 2400.5  | 689     | 30.13538 | 8.068588 | -1.90107 | Down | #####    | #####    |
| Cbx6         | 3095  | 3782.5  | 1086.5  | 43.80439 | 11.73309 | -1.90049 | Down | 0        | 0        |
| Chrd1        | 4141  | 1875    | 538     | 16.17581 | 4.334147 | -1.90002 | Down | #####    | #####    |
| Lonrf3       | 2711  | 295.5   | 84.5    | 3.903241 | 1.046122 | -1.89962 | Down | 8.35E-29 | 4.10E-28 |
| LOC100360791 | 818   | 10906   | 3143    | 477.4536 | 127.974  | -1.89951 | Down | 0        | 0        |
| Pabpc1       | 2190  | 48222.5 | 13909.5 | 790.1692 | 211.8442 | -1.89916 | Down | 0        | 0        |
| Znf469-ps1   | 11157 | 2003    | 577.5   | 6.438606 | 1.726247 | -1.89911 | Down | #####    | #####    |
| Ptms         | 1154  | 14267   | 4104.5  | 442.8905 | 118.7485 | -1.89904 | Down | 0        | 0        |
| Dgkz         | 3560  | 3291    | 947     | 33.15332 | 8.894919 | -1.8981  | Down | #####    | #####    |
| Tmtc4        | 2586  | 2499.5  | 716.5   | 34.52233 | 9.266977 | -1.89736 | Down | #####    | #####    |
| Bola1        | 746   | 263     | 76      | 12.68676 | 3.406163 | -1.8971  | Down | 1.86E-25 | 8.84E-25 |
| Klhdc8a      | 3199  | 739     | 212.5   | 8.271831 | 2.221022 | -1.89698 | Down | 4.04E-69 | 2.56E-68 |
| Dnmt1        | 5917  | 6981    | 2010    | 42.21616 | 11.34467 | -1.89578 | Down | 0        | 0        |
| Pofut1       | 1188  | 656     | 189     | 19.7813  | 5.317599 | -1.89529 | Down | 2.87E-61 | 1.75E-60 |
| Foxm1        | 3393  | 2324.5  | 671.5   | 24.55054 | 6.607897 | -1.89349 | Down | #####    | #####    |
| Serpib13     | 1608  | 21      | 6       | 0.466962 | 0.125697 | -1.89335 | Down | 0.003719 | 0.006049 |
| Xylt2        | 3375  | 1374    | 397.5   | 14.58797 | 3.928891 | -1.89259 | Down | #####    | #####    |
| Slc25a10     | 1946  | 2445    | 707.5   | 45.08884 | 12.15243 | -1.89153 | Down | #####    | #####    |

|              |      |         |        |          |          |          |      |          |          |
|--------------|------|---------|--------|----------|----------|----------|------|----------|----------|
| Slc25a39     | 1473 | 3655    | 1059   | 88.92045 | 23.9671  | -1.89146 | Down | 0        | 0        |
| Cpox         | 2810 | 567     | 164    | 7.212971 | 1.946312 | -1.88985 | Down | 5.76E-53 | 3.35E-52 |
| Pacsin3      | 1778 | 1485    | 431    | 29.92612 | 8.075993 | -1.88969 | Down | #####    | #####    |
| Bcr          | 4692 | 1708    | 494.5  | 13.04844 | 3.524559 | -1.88836 | Down | #####    | #####    |
| LOC684352    | 1582 | 854     | 248    | 19.35467 | 5.230423 | -1.88768 | Down | 1.51E-78 | 9.99E-78 |
| Pcdhgb7      | 4748 | 1228.5  | 356.5  | 9.268778 | 2.505023 | -1.88756 | Down | #####    | #####    |
| Fads2        | 1706 | 4999    | 1451.5 | 105.0799 | 28.42386 | -1.88631 | Down | 0        | 0        |
| Sap30l       | 1575 | 1013    | 295    | 23.06147 | 6.24426  | -1.88488 | Down | 1.50E-92 | 1.04E-91 |
| Rab6b        | 4577 | 2938    | 854    | 22.98648 | 6.230661 | -1.88333 | Down | #####    | #####    |
| Katnb1       | 1968 | 734     | 213    | 13.35676 | 3.62403  | -1.8819  | Down | 8.18E-68 | 5.16E-67 |
| Clybl        | 1250 | 113.5   | 33     | 3.245677 | 0.880692 | -1.88181 | Down | 1.22E-11 | 3.19E-11 |
| Lmna         | 3091 | 33359.5 | 9712.5 | 386.3062 | 104.8711 | -1.88113 | Down | 0        | 0        |
| Clic5        | 5847 | 618     | 180    | 3.780842 | 1.026582 | -1.88086 | Down | 3.84E-57 | 2.29E-56 |
| Prkar2a      | 1541 | 2803    | 816.5  | 65.17048 | 17.70375 | -1.88016 | Down | #####    | #####    |
| Fam151a      | 1912 | 27.5    | 8      | 0.514215 | 0.139694 | -1.8801  | Down | 0.001193 | 0.002014 |
| Dhcr7        | 2737 | 2548.5  | 745.5  | 33.40292 | 9.081848 | -1.87892 | Down | #####    | #####    |
| Zdhhc8       | 3384 | 1432.5  | 420.5  | 15.21038 | 4.136585 | -1.87854 | Down | #####    | #####    |
| Fndc5        | 2178 | 138     | 40.5   | 2.276735 | 0.619796 | -1.8771  | Down | 5.17E-14 | 2.05E-13 |
| Lmo4         | 1650 | 9149.5  | 2672.5 | 198.3979 | 54.01842 | -1.87687 | Down | 0        | 0        |
| Lbp          | 1881 | 318.5   | 93     | 6.079568 | 1.655488 | -1.87671 | Down | 4.53E-30 | 2.25E-29 |
| Lhx6         | 3407 | 373     | 109.5  | 3.92514  | 1.069212 | -1.8762  | Down | 5.04E-35 | 2.61E-34 |
| LOC100912402 | 1601 | 7183.5  | 2102   | 160.747  | 43.81879 | -1.87517 | Down | 0        | 0        |
| LOC690617    | 642  | 105     | 31     | 5.846146 | 1.593911 | -1.87491 | Down | 8.54E-11 | 2.13E-10 |
| Wif1         | 2182 | 2629    | 767.5  | 43.02305 | 11.73012 | -1.87489 | Down | #####    | #####    |
| Des          | 2169 | 68.5    | 20     | 1.132067 | 0.308684 | -1.87475 | Down | 1.78E-07 | 3.92E-07 |

|              |      |         |        |          |          |          |      |          |          |
|--------------|------|---------|--------|----------|----------|----------|------|----------|----------|
| Cndp1        | 2675 | 295     | 86     | 3.938257 | 1.074716 | -1.8736  | Down | 4.19E-28 | 2.05E-27 |
| Nras         | 1326 | 2417.5  | 704    | 65.00844 | 17.75356 | -1.87252 | Down | #####    | #####    |
| Mgat5        | 2623 | 523.5   | 154    | 7.151369 | 1.955383 | -1.87077 | Down | 4.80E-48 | 2.71E-47 |
| Slc4a2       | 4053 | 7150    | 2102   | 63.17039 | 17.29647 | -1.86877 | Down | 0        | 0        |
| Lfng         | 1860 | 1986    | 584.5  | 38.28002 | 10.48422 | -1.86837 | Down | #####    | #####    |
| Cdh24        | 2728 | 993     | 293.5  | 13.08385 | 3.586576 | -1.86711 | Down | 1.92E-89 | 1.32E-88 |
| Cadm4        | 1167 | 2784.5  | 819    | 85.52762 | 23.4455  | -1.86708 | Down | #####    | #####    |
| Aco1         | 3564 | 2095    | 614.5  | 21.02229 | 5.764211 | -1.86672 | Down | #####    | #####    |
| LOC100910384 | 2195 | 40.5    | 12     | 0.659584 | 0.180885 | -1.86649 | Down | 8.17E-05 | 0.000153 |
| Sec24d       | 3883 | 6383    | 1875.5 | 58.88291 | 16.15061 | -1.86626 | Down | 0        | 0        |
| Myh10        | 7648 | 6392.5  | 1878.5 | 29.90593 | 8.209111 | -1.86513 | Down | 0        | 0        |
| LOC100909580 | 2346 | 1696.5  | 500.5  | 25.95948 | 7.127984 | -1.8647  | Down | #####    | #####    |
| Furin        | 4259 | 10338.5 | 3052   | 87.09466 | 23.91527 | -1.86465 | Down | 0        | 0        |
| Fkbp10       | 2589 | 11848.5 | 3489   | 163.9673 | 45.03356 | -1.86434 | Down | 0        | 0        |
| Polr3h       | 1269 | 1086.5  | 320.5  | 30.63462 | 8.418379 | -1.86355 | Down | 8.46E-98 | 5.97E-97 |
| Vmac         | 516  | 57.5    | 17     | 3.994696 | 1.098209 | -1.86293 | Down | 2.18E-06 | 4.56E-06 |
| Tlr5         | 4255 | 115     | 34     | 0.968732 | 0.266358 | -1.86273 | Down | 1.12E-11 | 2.93E-11 |
| Ppl          | 6281 | 6881.5  | 2028.5 | 39.2376  | 10.78978 | -1.86257 | Down | 0        | 0        |
| LOC100909973 | 939  | 457     | 135.5  | 17.47878 | 4.811568 | -1.86103 | Down | 4.81E-42 | 2.62E-41 |
| Ppox         | 1793 | 392     | 115.5  | 7.815861 | 2.152943 | -1.86009 | Down | 1.43E-36 | 7.50E-36 |
| Pcdhga9      | 4732 | 627     | 185.5  | 4.7502   | 1.308517 | -1.86006 | Down | 3.94E-57 | 2.35E-56 |
| Atp9a        | 3286 | 4764    | 1408.5 | 51.89046 | 14.29999 | -1.85945 | Down | 0        | 0        |
| RGD1309310   | 4854 | 948.5   | 281.5  | 6.999991 | 1.929262 | -1.8593  | Down | 4.90E-85 | 3.33E-84 |
| Slc26a1      | 3414 | 51      | 15     | 0.535051 | 0.147482 | -1.85914 | Down | 6.46E-06 | 1.31E-05 |
| LOC100361389 | 3105 | 196     | 58     | 2.263582 | 0.62481  | -1.85712 | Down | 6.93E-19 | 3.07E-18 |

|              |      |         |        |          |          |          |      |          |          |
|--------------|------|---------|--------|----------|----------|----------|------|----------|----------|
| LOC100359816 | 6955 | 729     | 216.5  | 3.760244 | 1.039223 | -1.85532 | Down | 7.82E-66 | 4.87E-65 |
| Ecel1        | 7798 | 22      | 6.5    | 0.101688 | 0.028118 | -1.85459 | Down | 0.002316 | 0.003824 |
| Epb4111      | 5813 | 2092.5  | 622.5  | 12.89116 | 3.565945 | -1.85403 | Down | #####    | #####    |
| Tpcn1        | 4735 | 13843.5 | 4107.5 | 104.698  | 28.96787 | -1.85371 | Down | 0        | 0        |
| Aspscr1      | 1708 | 1541    | 458    | 32.33757 | 8.969005 | -1.85019 | Down | #####    | #####    |
| RGD1560175   | 8065 | 2214    | 660    | 9.841683 | 2.731878 | -1.84901 | Down | #####    | #####    |
| Astn1        | 7201 | 53.5    | 16     | 0.26629  | 0.073933 | -1.84872 | Down | 5.85E-06 | 1.19E-05 |
| Dapk3        | 1514 | 2165    | 649    | 51.27712 | 14.24699 | -1.84766 | Down | #####    | #####    |
| Cybb         | 1713 | 52.5    | 15.5   | 1.097186 | 0.304989 | -1.84698 | Down | 4.12E-06 | 8.46E-06 |
| Rhobtb2      | 2903 | 406.5   | 122    | 5.021602 | 1.396586 | -1.84624 | Down | 7.78E-37 | 4.09E-36 |
| Tubb4b       | 1578 | 25368.5 | 7582   | 576.3495 | 160.3046 | -1.84613 | Down | 0        | 0        |
| Fzd2         | 1912 | 2044    | 614.5  | 38.43867 | 10.69375 | -1.84579 | Down | #####    | #####    |
| Tsc2         | 5654 | 3169    | 946.5  | 20.08874 | 5.590585 | -1.84532 | Down | #####    | #####    |
| Ppp2r4       | 2479 | 8657    | 2581.5 | 124.7672 | 34.75474 | -1.84396 | Down | 0        | 0        |
| Vwa5a        | 5941 | 994     | 298    | 5.98947  | 1.66968  | -1.84286 | Down | 6.17E-88 | 4.23E-87 |
| Parp1        | 3571 | 4094.5  | 1221.5 | 41.0093  | 11.43507 | -1.84249 | Down | 0        | 0        |
| Map4         | 5535 | 18612   | 5565.5 | 120.3842 | 33.57054 | -1.84238 | Down | 0        | 0        |
| RGD1306271   | 8101 | 1019.5  | 304.5  | 4.501184 | 1.255664 | -1.84185 | Down | 1.32E-90 | 9.12E-90 |
| Cdr2l        | 2015 | 883.5   | 264.5  | 15.74265 | 4.394374 | -1.84095 | Down | 1.46E-78 | 9.70E-78 |
| Sema4c       | 4189 | 2050.5  | 614    | 17.51145 | 4.893865 | -1.83925 | Down | #####    | #####    |
| Stk25        | 2021 | 2684.5  | 804.5  | 47.56601 | 13.2972  | -1.83881 | Down | #####    | #####    |
| Htra1        | 2012 | 28885   | 8674   | 514.2996 | 143.8196 | -1.83835 | Down | 0        | 0        |
| Itga4        | 3736 | 2219.5  | 665    | 21.25328 | 5.943745 | -1.83824 | Down | #####    | #####    |
| Anxa7        | 1885 | 3671.5  | 1100   | 69.67548 | 19.49543 | -1.83751 | Down | 0        | 0        |
| Ifi35        | 1101 | 275     | 82     | 8.925704 | 2.498019 | -1.83718 | Down | 1.12E-25 | 5.36E-25 |

|              |      |        |        |          |          |          |      |          |          |
|--------------|------|--------|--------|----------|----------|----------|------|----------|----------|
| Bmp7         | 2445 | 840    | 253    | 12.33186 | 3.452541 | -1.83666 | Down | 3.37E-74 | 2.19E-73 |
| Pdzm3        | 4109 | 1454.5 | 436.5  | 12.68598 | 3.552055 | -1.83651 | Down | #####    | #####    |
| Hyou1        | 4498 | 8151.5 | 2449   | 64.83841 | 18.15751 | -1.83628 | Down | 0        | 0        |
| Kank2        | 4792 | 2886.5 | 868    | 21.56467 | 6.042081 | -1.83555 | Down | #####    | #####    |
| Lrp5         | 5101 | 3921   | 1180   | 27.55855 | 7.722572 | -1.83535 | Down | 0        | 0        |
| Mpdz         | 7516 | 2432.5 | 730    | 11.57927 | 3.245366 | -1.83509 | Down | #####    | #####    |
| Prr12        | 7017 | 2647   | 798    | 13.53378 | 3.795721 | -1.83412 | Down | #####    | #####    |
| Ppargc1b     | 3163 | 37     | 11     | 0.41804  | 0.117248 | -1.83408 | Down | 0.000142 | 0.00026  |
| Gsr          | 1850 | 2058.5 | 617.5  | 39.80603 | 11.16611 | -1.83386 | Down | #####    | #####    |
| Col8a1       | 2432 | 2956   | 888.5  | 43.52706 | 12.21021 | -1.83382 | Down | #####    | #####    |
| Clcn2        | 3217 | 212.5  | 64     | 2.360019 | 0.662249 | -1.83335 | Down | 7.07E-20 | 3.17E-19 |
| Mast3        | 5371 | 1083   | 326.5  | 7.229048 | 2.028811 | -1.83317 | Down | 3.34E-95 | 2.33E-94 |
| Galnt2       | 3842 | 4384   | 1321.5 | 40.86648 | 11.47359 | -1.8326  | Down | 0        | 0        |
| Pck2         | 2203 | 696.5  | 208.5  | 11.29174 | 3.170268 | -1.83259 | Down | 2.49E-62 | 1.53E-61 |
| Igfbp6       | 869  | 20     | 6      | 0.827509 | 0.23259  | -1.83098 | Down | 0.005925 | 0.009469 |
| Plxb2        | 6769 | 15228  | 4595   | 80.6316  | 22.66729 | -1.83073 | Down | 0        | 0        |
| LOC100910915 | 628  | 176.5  | 53.5   | 10.06741 | 2.832077 | -1.82976 | Down | 8.52E-17 | 3.68E-16 |
| Pcdhga12     | 4738 | 593    | 178.5  | 4.480747 | 1.261143 | -1.82901 | Down | 4.25E-53 | 2.48E-52 |
| Haghl        | 1047 | 52     | 15.5   | 1.778843 | 0.500712 | -1.82889 | Down | 4.12E-06 | 8.46E-06 |
| Creb3l1      | 2672 | 3251   | 985.5  | 43.7713  | 12.32281 | -1.82865 | Down | #####    | #####    |
| Mug1         | 4620 | 26     | 8      | 0.202495 | 0.057033 | -1.828   | Down | 0.001878 | 0.003127 |
| Dnajb14      | 1729 | 374.5  | 112.5  | 7.741167 | 2.180432 | -1.82794 | Down | 3.45E-34 | 1.78E-33 |
| Rps4x        | 915  | 6719   | 2032.5 | 262.8614 | 74.14529 | -1.82588 | Down | 0        | 0        |
| LOC689803    | 1448 | 688.5  | 208    | 16.92028 | 4.773519 | -1.82563 | Down | 7.87E-61 | 4.79E-60 |
| Gna11        | 1080 | 1352   | 410.5  | 44.83513 | 12.65383 | -1.82506 | Down | #####    | #####    |

|              |      |         |        |          |          |          |      |          |          |
|--------------|------|---------|--------|----------|----------|----------|------|----------|----------|
| Mesdc1       | 2046 | 1703.5  | 517    | 29.88155 | 8.433813 | -1.825   | Down | #####    | #####    |
| Unc5b        | 2838 | 10429   | 3165.5 | 131.8468 | 37.2407  | -1.82391 | Down | 0        | 0        |
| RGD1561609   | 4993 | 172     | 52     | 1.233128 | 0.348431 | -1.82338 | Down | 2.23E-16 | 9.55E-16 |
| Tmem44       | 1343 | 23      | 7      | 0.613245 | 0.173349 | -1.82278 | Down | 0.003327 | 0.005425 |
| LOC100910298 | 1025 | 89      | 27     | 3.113745 | 0.880336 | -1.82253 | Down | 4.17E-09 | 9.80E-09 |
| Eml1         | 2618 | 1318    | 400.5  | 18.03522 | 5.099758 | -1.82232 | Down | #####    | #####    |
| RGD1307222   | 5370 | 4723.5  | 1434   | 31.50969 | 8.910053 | -1.82229 | Down | 0        | 0        |
| Stub1        | 1283 | 3037.5  | 925    | 84.96904 | 24.06165 | -1.8202  | Down | #####    | #####    |
| Arrb1        | 1353 | 1741.5  | 528.5  | 46.10231 | 13.05963 | -1.81972 | Down | #####    | #####    |
| Tacc3        | 2042 | 3091.5  | 938    | 54.07304 | 15.32137 | -1.81936 | Down | #####    | #####    |
| LOC100910790 | 1513 | 767     | 232.5  | 18.15208 | 5.143876 | -1.81921 | Down | 1.42E-67 | 8.92E-67 |
| Mapk8ip1     | 3003 | 1790.5  | 546    | 21.37167 | 6.058041 | -1.81878 | Down | #####    | #####    |
| Slc22a17     | 2365 | 1021    | 312    | 15.45631 | 4.383968 | -1.81789 | Down | 2.62E-88 | 1.80E-87 |
| Ube2c        | 763  | 2600    | 793    | 122.1552 | 34.66532 | -1.81715 | Down | #####    | #####    |
| LOC100911560 | 1613 | 70      | 21.5   | 1.549344 | 0.439719 | -1.81701 | Down | 1.62E-07 | 3.57E-07 |
| Cttn         | 2951 | 13454.5 | 4101   | 163.2934 | 46.36984 | -1.81621 | Down | 0        | 0        |
| LOC100362372 | 4238 | 21      | 6.5    | 0.177583 | 0.050463 | -1.81518 | Down | 0.003719 | 0.006049 |
| Trim28       | 3001 | 10738   | 3278   | 128.1211 | 36.41242 | -1.81501 | Down | 0        | 0        |
| Itgb4        | 5896 | 215     | 66     | 1.308254 | 0.371901 | -1.81465 | Down | 8.98E-20 | 4.02E-19 |
| Papss1       | 2375 | 6653    | 2027.5 | 100.2404 | 28.49971 | -1.81445 | Down | 0        | 0        |
| Kif22        | 2098 | 3719    | 1134.5 | 63.39473 | 18.03836 | -1.81329 | Down | 0        | 0        |
| Cenpb        | 2681 | 5268.5  | 1612   | 70.35927 | 20.02978 | -1.81259 | Down | 0        | 0        |
| Bcas1        | 2675 | 377     | 115    | 5.046096 | 1.437676 | -1.81143 | Down | 9.52E-34 | 4.89E-33 |
| Pfkm         | 2757 | 1725.5  | 527.5  | 22.42187 | 6.391039 | -1.81078 | Down | #####    | #####    |
| Ccny         | 1456 | 2199.5  | 671.5  | 54.04732 | 15.40803 | -1.81054 | Down | #####    | #####    |



|              |      |         |        |          |          |          |      |          |          |
|--------------|------|---------|--------|----------|----------|----------|------|----------|----------|
| Ncor2        | 8576 | 22964.5 | 7044   | 96.16002 | 27.4194  | -1.81024 | Down | 0        | 0        |
| LOC690955    | 2490 | 41      | 12.5   | 0.589432 | 0.168147 | -1.80961 | Down | 5.21E-05 | 9.94E-05 |
| Pdk2         | 2207 | 744.5   | 229.5  | 12.10669 | 3.454881 | -1.8091  | Down | 2.71E-64 | 1.68E-63 |
| Ogdh         | 3266 | 4322    | 1324   | 47.43559 | 13.54098 | -1.80864 | Down | 0        | 0        |
| LOC100909685 | 768  | 72      | 22     | 3.358411 | 0.958737 | -1.80857 | Down | 1.46E-07 | 3.23E-07 |
| MGC93975     | 1673 | 4755    | 1458   | 101.7562 | 29.06125 | -1.80795 | Down | 0        | 0        |
| LOC311578    | 7233 | 2601.5  | 800    | 12.87911 | 3.682268 | -1.80637 | Down | #####    | #####    |
| Pcdha2       | 5244 | 35.5    | 11     | 0.24306  | 0.069518 | -1.80584 | Down | 0.000346 | 0.000619 |
| Mn1          | 3915 | 261     | 80     | 2.396241 | 0.685452 | -1.80565 | Down | 1.02E-23 | 4.74E-23 |
| Ano4         | 3975 | 428     | 131    | 3.843942 | 1.100069 | -1.80499 | Down | 6.02E-38 | 3.19E-37 |
| Col6a1       | 4044 | 39276.5 | 12062  | 347.8652 | 99.60322 | -1.80426 | Down | 0        | 0        |
| Dclk2        | 3982 | 277     | 84.5   | 2.49135  | 0.714022 | -1.80289 | Down | 2.22E-25 | 1.06E-24 |
| Apba3        | 1939 | 1413    | 436    | 26.15337 | 7.496157 | -1.80277 | Down | #####    | #####    |
| Prkra        | 1589 | 695     | 214    | 15.62676 | 4.483938 | -1.80118 | Down | 3.80E-60 | 2.30E-59 |
| Kcng1        | 2745 | 479     | 148    | 6.25772  | 1.795828 | -1.80099 | Down | 8.15E-42 | 4.44E-41 |
| Flnc         | 9049 | 2851.5  | 878    | 11.27831 | 3.237045 | -1.8008  | Down | #####    | #####    |
| Arntl2       | 2749 | 594.5   | 183    | 7.7361   | 2.220912 | -1.80045 | Down | 1.26E-51 | 7.30E-51 |
| Prkcdbp      | 1049 | 10681.5 | 3307.5 | 366.0766 | 105.1276 | -1.8     | Down | 0        | 0        |
| Spn          | 3866 | 202     | 62     | 1.865831 | 0.535898 | -1.79979 | Down | 1.14E-18 | 5.03E-18 |
| Mybbp1a      | 3834 | 7059    | 2178   | 65.92686 | 18.95448 | -1.79833 | Down | 0        | 0        |
| LOC100910454 | 1348 | 526     | 161.5  | 13.9195  | 4.002982 | -1.79796 | Down | 2.97E-46 | 1.66E-45 |
| Mcm5         | 2528 | 5498    | 1698.5 | 77.96736 | 22.42625 | -1.79768 | Down | 0        | 0        |
| Lztr1        | 2779 | 2005    | 618.5  | 25.82276 | 7.434039 | -1.79642 | Down | #####    | #####    |
| Lpcat3       | 1935 | 3712    | 1146.5 | 68.70598 | 19.78306 | -1.79617 | Down | 0        | 0        |
| Zcchc24      | 4423 | 2392.5  | 738.5  | 19.36548 | 5.576466 | -1.79606 | Down | #####    | #####    |

|              |       |         |        |          |          |          |      |          |          |
|--------------|-------|---------|--------|----------|----------|----------|------|----------|----------|
| Tacc1        | 7653  | 4479    | 1383   | 20.94694 | 6.034857 | -1.79535 | Down | 0        | 0        |
| LOC304558    | 10561 | 985.5   | 304.5  | 3.345276 | 0.964287 | -1.79459 | Down | 2.85E-84 | 1.93E-83 |
| RT1-T24-1    | 1059  | 648.5   | 201    | 21.90906 | 6.324975 | -1.7924  | Down | 1.02E-55 | 6.06E-55 |
| Olfm2        | 2024  | 559     | 174    | 9.896419 | 2.857314 | -1.79225 | Down | 4.22E-48 | 2.38E-47 |
| Ldlr         | 3037  | 7341    | 2275   | 86.61338 | 25.0244  | -1.79125 | Down | 0        | 0        |
| LOC100909949 | 1411  | 867     | 268.5  | 22.02915 | 6.367548 | -1.7906  | Down | 2.95E-74 | 1.93E-73 |
| Dnpep        | 1674  | 3167.5  | 981.5  | 67.70761 | 19.57886 | -1.79002 | Down | #####    | #####    |
| Tbcb         | 1107  | 731     | 226.5  | 23.64269 | 6.838088 | -1.78973 | Down | 7.14E-63 | 4.39E-62 |
| Zfp385a      | 2293  | 3100    | 965    | 48.59663 | 14.06876 | -1.78836 | Down | #####    | #####    |
| LOC687022    | 3134  | 359.5   | 111.5  | 4.102943 | 1.1894   | -1.78643 | Down | 1.01E-31 | 5.08E-31 |
| Wasf1        | 2579  | 1117.5  | 347.5  | 15.53327 | 4.504369 | -1.78596 | Down | 1.39E-94 | 9.68E-94 |
| LOC688708    | 2814  | 204.5   | 63.5   | 2.595867 | 0.752918 | -1.78565 | Down | 1.03E-18 | 4.56E-18 |
| Ppp1r9b      | 4505  | 4644.5  | 1446   | 36.95945 | 10.72098 | -1.78551 | Down | 0        | 0        |
| Igsf8        | 2206  | 1486    | 464    | 24.14632 | 7.004478 | -1.78545 | Down | #####    | #####    |
| Hsd17b8      | 970   | 188     | 58.5   | 6.945948 | 2.014926 | -1.78544 | Down | 2.22E-17 | 9.64E-17 |
| LOC100360117 | 862   | 7270    | 2264   | 301.8459 | 87.58021 | -1.78514 | Down | 0        | 0        |
| Tpm3         | 1770  | 16496.5 | 5135   | 333.9062 | 96.95508 | -1.78405 | Down | 0        | 0        |
| LOC691317    | 1029  | 27      | 8.5    | 0.941705 | 0.273603 | -1.78319 | Down | 0.001193 | 0.002014 |
| Pcdhga7      | 4761  | 625.5   | 195    | 4.705837 | 1.367828 | -1.78256 | Down | 1.97E-53 | 1.15E-52 |
| Ubqln4       | 3258  | 3590    | 1122   | 39.49953 | 11.48956 | -1.78151 | Down | #####    | #####    |
| Nlrp1a       | 3690  | 622     | 194    | 6.018544 | 1.753345 | -1.77931 | Down | 3.33E-53 | 1.94E-52 |
| Chl1         | 3511  | 2601    | 810.5  | 26.4617  | 7.71067  | -1.77898 | Down | #####    | #####    |
| Rpl8         | 845   | 9910.5  | 3096.5 | 419.9004 | 122.373  | -1.77876 | Down | 0        | 0        |
| RGD1564125   | 1173  | 79.5    | 24.5   | 2.417629 | 0.704627 | -1.77866 | Down | 3.22E-08 | 7.33E-08 |
| Adam23       | 2876  | 137     | 42.5   | 1.705553 | 0.497284 | -1.7781  | Down | 3.84E-13 | 1.32E-12 |

|              |      |        |        |          |          |          |      |          |          |
|--------------|------|--------|--------|----------|----------|----------|------|----------|----------|
| Arap3-ps1    | 5350 | 1253.5 | 392    | 8.386175 | 2.450492 | -1.77494 | Down | #####    | #####    |
| LOC100362640 | 955  | 14733  | 4616.5 | 551.9567 | 161.2963 | -1.77484 | Down | 0        | 0        |
| Twsg1        | 4181 | 2862   | 895    | 24.44899 | 7.148624 | -1.77404 | Down | #####    | #####    |
| Col3a1       | 4792 | 16093  | 5042   | 120.0498 | 35.1226  | -1.77316 | Down | 0        | 0        |
| Ppm1j        | 1711 | 98     | 31     | 2.055569 | 0.601748 | -1.77231 | Down | 1.78E-09 | 4.24E-09 |
| Actn4        | 3885 | 52146  | 16399  | 481.2702 | 140.9228 | -1.77194 | Down | 0        | 0        |
| Yipf2        | 1977 | 935    | 294    | 16.95548 | 4.964958 | -1.7719  | Down | 2.50E-78 | 1.66E-77 |
| LOC100361376 | 4792 | 2780   | 873    | 20.76839 | 6.083491 | -1.77142 | Down | #####    | #####    |
| Guca2a       | 567  | 469.5  | 149    | 29.8945  | 8.757733 | -1.77125 | Down | 1.17E-39 | 6.26E-39 |
| Il17d        | 1193 | 55.5   | 17.5   | 1.6755   | 0.49088  | -1.77115 | Down | 5.27E-06 | 1.07E-05 |
| Abcd1        | 3411 | 824    | 259    | 8.652275 | 2.535352 | -1.77089 | Down | 2.84E-69 | 1.80E-68 |
| Leprel2      | 2049 | 1012.5 | 318.5  | 17.70598 | 5.192118 | -1.76984 | Down | 1.07E-84 | 7.26E-84 |
| Foxk2        | 4359 | 3761.5 | 1183.5 | 30.88879 | 9.058257 | -1.76978 | Down | 0        | 0        |
| Anapc2       | 2681 | 3167   | 995.5  | 42.30451 | 12.409   | -1.76942 | Down | #####    | #####    |
| Eif2c1       | 4452 | 939    | 295.5  | 7.550364 | 2.215937 | -1.76863 | Down | 9.73E-79 | 6.46E-78 |
| LOC100911445 | 1014 | 94     | 30     | 3.339804 | 0.980675 | -1.76792 | Down | 4.66E-09 | 1.09E-08 |
| Coro2b       | 3310 | 2194.5 | 691.5  | 23.77966 | 6.983756 | -1.76765 | Down | #####    | #####    |
| LOC681300    | 948  | 150    | 47.5   | 5.675212 | 1.670489 | -1.7644  | Down | 6.37E-14 | 2.51E-13 |
| Pcdha4       | 5241 | 41.5   | 13     | 0.282961 | 0.083329 | -1.76371 | Down | 0.000114 | 0.000211 |
| Elfn2-ps1    | 2574 | 164.5  | 52     | 2.299656 | 0.677278 | -1.7636  | Down | 6.84E-15 | 2.86E-14 |
| Ptprs        | 6040 | 9393.5 | 2969.5 | 55.73356 | 16.41538 | -1.7635  | Down | 0        | 0        |
| Phf19        | 3789 | 660    | 208.5  | 6.230604 | 1.837081 | -1.76196 | Down | 1.17E-55 | 6.91E-55 |
| Sult2a2      | 993  | 39.5   | 12.5   | 1.42369  | 0.419824 | -1.76178 | Down | 0.000128 | 0.000234 |
| Ptpn5        | 2815 | 25.5   | 8      | 0.326082 | 0.096162 | -1.7617  | Down | 0.002935 | 0.004799 |
| RGD1561149   | 5170 | 389    | 123.5  | 2.700824 | 0.796755 | -1.76119 | Down | 2.33E-33 | 1.19E-32 |

|              |       |         |        |          |          |          |      |          |          |
|--------------|-------|---------|--------|----------|----------|----------|------|----------|----------|
| Nxn          | 1347  | 970     | 307.5  | 25.81714 | 7.619372 | -1.76058 | Down | 1.48E-80 | 9.93E-80 |
| Ehd3         | 2108  | 2792    | 881.5  | 47.39493 | 13.99527 | -1.75979 | Down | #####    | #####    |
| Bub1         | 4583  | 3891    | 1228.5 | 30.30778 | 8.949825 | -1.75976 | Down | 0        | 0        |
| Psmb8        | 1086  | 1905.5  | 601    | 62.7693  | 18.53699 | -1.75965 | Down | #####    | #####    |
| Keap1        | 2208  | 845.5   | 267.5  | 13.7305  | 4.055219 | -1.75953 | Down | 1.52E-70 | 9.71E-70 |
| Aldh18a1     | 3413  | 4158.5  | 1320   | 43.64228 | 12.89173 | -1.75928 | Down | 0        | 0        |
| Ncln         | 2923  | 6415.5  | 2039   | 78.74925 | 23.26658 | -1.75901 | Down | 0        | 0        |
| Lrp1         | 14714 | 30747.5 | 9725.5 | 74.6823  | 22.07723 | -1.75821 | Down | 0        | 0        |
| LOC100910245 | 772   | 160     | 51     | 7.406558 | 2.190449 | -1.75758 | Down | 1.77E-14 | 7.27E-14 |
| Ankrd13b     | 3085  | 855     | 271.5  | 9.951249 | 2.944528 | -1.75684 | Down | 4.31E-71 | 2.77E-70 |
| Spats2l      | 2506  | 580     | 186    | 8.302199 | 2.457201 | -1.75648 | Down | 4.23E-48 | 2.39E-47 |
| Syndig1      | 2055  | 294     | 93.5   | 5.128841 | 1.519278 | -1.75525 | Down | 1.38E-25 | 6.58E-25 |
| Prr7         | 970   | 1025    | 328.5  | 38.01909 | 11.26641 | -1.7547  | Down | 6.98E-84 | 4.73E-83 |
| Adrbk1       | 2683  | 2100    | 668.5  | 28.02527 | 8.305118 | -1.75466 | Down | #####    | #####    |
| Fam189b      | 3053  | 1076.5  | 342    | 12.65572 | 3.750636 | -1.75458 | Down | 1.07E-88 | 7.34E-88 |
| Fam120a      | 5018  | 15386   | 4897.5 | 109.7812 | 32.54409 | -1.75416 | Down | 0        | 0        |
| LOC100909464 | 980   | 290     | 92     | 10.59477 | 3.141619 | -1.75377 | Down | 3.56E-25 | 1.69E-24 |
| Evl          | 1854  | 841     | 267.5  | 16.24816 | 4.821263 | -1.75279 | Down | 8.11E-70 | 5.16E-69 |
| Aox1         | 4303  | 770     | 244.5  | 6.392567 | 1.896962 | -1.7527  | Down | 3.22E-64 | 1.99E-63 |
| Epb4.1       | 5108  | 5531.5  | 1759   | 38.75072 | 11.50084 | -1.75248 | Down | 0        | 0        |
| RGD1310852   | 1328  | 230.5   | 73     | 6.194677 | 1.838658 | -1.75238 | Down | 2.85E-20 | 1.29E-19 |
| Gnb4         | 1516  | 3062.5  | 974    | 72.17044 | 21.45749 | -1.74993 | Down | #####    | #####    |
| Twist1       | 1513  | 1875.5  | 598.5  | 44.39501 | 13.2042  | -1.7494  | Down | #####    | #####    |
| LOC100911256 | 5640  | 309     | 98.5   | 1.960159 | 0.583005 | -1.74939 | Down | 9.90E-27 | 4.78E-26 |
| Pacs1        | 4198  | 1742    | 557    | 14.87619 | 4.430051 | -1.74761 | Down | #####    | #####    |

|            |      |        |        |          |          |          |      |          |          |
|------------|------|--------|--------|----------|----------|----------|------|----------|----------|
| Cyp2a2     | 2259 | 175.5  | 55.5   | 2.769184 | 0.824842 | -1.74727 | Down | 5.97E-16 | 2.54E-15 |
| Gnptab     | 4370 | 2176   | 695.5  | 17.83104 | 5.311459 | -1.74721 | Down | #####    | #####    |
| Iars2      | 3053 | 2436.5 | 779.5  | 28.57162 | 8.512469 | -1.74693 | Down | #####    | #####    |
| Akr7a2     | 1272 | 814.5  | 261    | 22.91376 | 6.831491 | -1.74594 | Down | 8.05E-67 | 5.04E-66 |
| Fam134a    | 2541 | 1160.5 | 370.5  | 16.34019 | 4.873933 | -1.74527 | Down | 4.56E-95 | 3.19E-94 |
| Id3        | 983  | 6901   | 2208   | 250.7825 | 74.88217 | -1.74374 | Down | 0        | 0        |
| Padi3      | 3099 | 335.5  | 107.5  | 3.879378 | 1.158578 | -1.74347 | Down | 1.31E-28 | 6.43E-28 |
| Abca2      | 8040 | 2184   | 701.5  | 9.733559 | 2.90694  | -1.74347 | Down | #####    | #####    |
| Pcdhga8    | 4689 | 571.5  | 183    | 4.359523 | 1.304156 | -1.74105 | Down | 2.04E-47 | 1.15E-46 |
| Setd6      | 1683 | 302.5  | 97     | 6.420894 | 1.921046 | -1.74088 | Down | 8.96E-26 | 4.29E-25 |
| Tmem109    | 1924 | 2641.5 | 846.5  | 49.12204 | 14.69921 | -1.74063 | Down | #####    | #####    |
| Sgsm3      | 2854 | 795.5  | 256.5  | 9.98748  | 2.989406 | -1.74026 | Down | 5.84E-65 | 3.62E-64 |
| Fkbp8      | 1679 | 4389.5 | 1413.5 | 93.74453 | 28.09637 | -1.73835 | Down | 0        | 0        |
| Ergic3     | 1338 | 2619.5 | 842.5  | 70.03723 | 20.99951 | -1.73777 | Down | #####    | #####    |
| LOC500956  | 1875 | 130    | 42     | 2.487699 | 0.745945 | -1.73767 | Down | 7.55E-12 | 2.01E-11 |
| RGD1307722 | 1831 | 255.5  | 82.5   | 4.996525 | 1.498668 | -1.73724 | Down | 5.67E-22 | 2.60E-21 |
| Ppdpf      | 685  | 714    | 231.5  | 37.49571 | 11.24715 | -1.73717 | Down | 3.51E-58 | 2.11E-57 |
| Tyro3      | 3726 | 344.5  | 111.5  | 3.312539 | 0.994144 | -1.73641 | Down | 5.57E-29 | 2.74E-28 |
| Gprasp2    | 3799 | 490    | 157.5  | 4.599821 | 1.381435 | -1.73541 | Down | 6.11E-41 | 3.30E-40 |
| Ptp4a3     | 1353 | 46     | 15     | 1.220815 | 0.366816 | -1.73472 | Down | 5.78E-05 | 0.00011  |
| Sun1       | 2497 | 3688   | 1190   | 52.93903 | 15.91194 | -1.73422 | Down | #####    | #####    |
| LOC680768  | 1194 | 1586   | 509    | 47.40821 | 14.2546  | -1.73371 | Down | #####    | #####    |
| Arhgef2    | 4217 | 6695   | 2159   | 56.81907 | 17.09109 | -1.73313 | Down | 0        | 0        |
| Prelp      | 1446 | 708    | 229    | 17.59577 | 5.293002 | -1.73307 | Down | 1.00E-57 | 6.00E-57 |
| Tubb2a     | 1545 | 8261.5 | 2669   | 191.4987 | 57.60899 | -1.73297 | Down | 0        | 0        |

|              |      |         |         |          |          |          |      |          |          |
|--------------|------|---------|---------|----------|----------|----------|------|----------|----------|
| Etv5         | 3897 | 6235.5  | 2014    | 57.30868 | 17.25087 | -1.73208 | Down | 0        | 0        |
| LOC683420    | 2269 | 1740    | 561     | 27.42877 | 8.257912 | -1.73184 | Down | #####    | #####    |
| Tmem9        | 1120 | 1655    | 532.5   | 52.81877 | 15.91744 | -1.73044 | Down | #####    | #####    |
| Cbln2        | 2385 | 165     | 53      | 2.465231 | 0.743061 | -1.73017 | Down | 9.33E-15 | 3.88E-14 |
| Plekhh3      | 3001 | 519     | 168     | 6.205061 | 1.870538 | -1.72999 | Down | 9.92E-43 | 5.43E-42 |
| Olfml2a      | 5515 | 122     | 39.5    | 0.793658 | 0.239371 | -1.72927 | Down | 2.46E-11 | 6.28E-11 |
| Dazl         | 2836 | 46.5    | 15      | 0.586411 | 0.176905 | -1.72894 | Down | 5.78E-05 | 0.00011  |
| LOC100911851 | 1907 | 416.5   | 135     | 7.799782 | 2.353602 | -1.72856 | Down | 1.80E-34 | 9.32E-34 |
| Mrc2         | 4443 | 4871.5  | 1582    | 39.26819 | 11.87291 | -1.72569 | Down | 0        | 0        |
| Coro1b       | 1800 | 5975.5  | 1940.5  | 118.9995 | 35.98309 | -1.72557 | Down | 0        | 0        |
| LOC100910835 | 1213 | 1934    | 630     | 57.21236 | 17.30758 | -1.72492 | Down | #####    | #####    |
| Gpd1l        | 1261 | 425.5   | 138     | 12.07731 | 3.655179 | -1.72429 | Down | 3.71E-35 | 1.93E-34 |
| LOC295112    | 1941 | 112.5   | 37      | 2.068524 | 0.626229 | -1.72384 | Down | 3.83E-10 | 9.32E-10 |
| Hoxa13       | 1412 | 43      | 14      | 1.093371 | 0.331031 | -1.72375 | Down | 0.0001   | 0.000187 |
| Eef2         | 2944 | 86448.5 | 28084.5 | 1051.743 | 318.474  | -1.72353 | Down | 0        | 0        |
| Mpst         | 1304 | 742.5   | 242     | 20.42011 | 6.186356 | -1.72283 | Down | 8.58E-60 | 5.20E-59 |
| Ankrd41      | 1821 | 341     | 110     | 6.685959 | 2.026661 | -1.72203 | Down | 9.44E-29 | 4.64E-28 |
| Setd8        | 969  | 2532    | 823.5   | 93.55792 | 28.36851 | -1.72157 | Down | #####    | #####    |
| LOC100911774 | 1172 | 728.5   | 237.5   | 22.2808  | 6.756841 | -1.72138 | Down | 7.85E-59 | 4.74E-58 |
| Sptan1       | 7866 | 18249   | 5925.5  | 82.9691  | 25.16116 | -1.72138 | Down | 0        | 0        |
| Slc8a1       | 6134 | 836     | 272     | 4.870149 | 1.47695  | -1.72134 | Down | 2.39E-67 | 1.50E-66 |
| Nptxr        | 4870 | 65268   | 21277   | 480.6653 | 145.8206 | -1.72084 | Down | 0        | 0        |
| Pip5k1c      | 4343 | 3092.5  | 1007    | 25.55401 | 7.754783 | -1.72039 | Down | #####    | #####    |
| Ankrd34a     | 2887 | 228     | 74.5    | 2.837491 | 0.86109  | -1.72038 | Down | 1.36E-19 | 6.08E-19 |
| LOC691221    | 2357 | 342.5   | 111.5   | 5.192794 | 1.576147 | -1.72011 | Down | 1.28E-28 | 6.27E-28 |

|              |      |        |        |          |          |          |      |          |          |
|--------------|------|--------|--------|----------|----------|----------|------|----------|----------|
| Cotl1        | 1618 | 4796   | 1567   | 106.3782 | 32.29606 | -1.71977 | Down | 0        | 0        |
| Slc36a2      | 2436 | 37     | 12     | 0.546566 | 0.165945 | -1.71969 | Down | 0.000306 | 0.000549 |
| Larp1        | 6337 | 12733  | 4143.5 | 71.87836 | 21.83557 | -1.71888 | Down | 0        | 0        |
| Gda          | 1460 | 1147   | 373    | 28.03059 | 8.519165 | -1.71822 | Down | 8.68E-92 | 6.02E-91 |
| Pnp          | 1052 | 3360   | 1094   | 114.2707 | 34.73258 | -1.71809 | Down | #####    | #####    |
| LOC100911673 | 1014 | 84     | 27.5   | 2.976167 | 0.905017 | -1.71744 | Down | 3.58E-08 | 8.14E-08 |
| LOC100910370 | 848  | 4436.5 | 1446.5 | 187.2434 | 56.9574  | -1.71696 | Down | 0        | 0        |
| Grk6         | 2828 | 3900   | 1273.5 | 49.37524 | 15.02116 | -1.71679 | Down | #####    | #####    |
| Fam210b      | 1772 | 303.5  | 99     | 6.123448 | 1.863259 | -1.71652 | Down | 2.49E-25 | 1.18E-24 |
| RGD1306058   | 840  | 1317.5 | 430.5  | 56.11986 | 17.11342 | -1.71338 | Down | #####    | #####    |
| Ltbp4        | 5157 | 1417   | 464    | 9.847915 | 3.00432  | -1.71278 | Down | #####    | #####    |
| Pcdhga10     | 4689 | 564    | 184    | 4.302105 | 1.313579 | -1.71154 | Down | 7.62E-46 | 4.25E-45 |
| Atg2a        | 6340 | 1307.5 | 428.5  | 7.394374 | 2.257997 | -1.71138 | Down | #####    | #####    |
| Bend4        | 1383 | 134    | 44     | 3.477847 | 1.062198 | -1.71114 | Down | 5.98E-12 | 1.61E-11 |
| Zc3h7b       | 5466 | 5116.5 | 1676   | 33.532   | 10.24308 | -1.71089 | Down | 0        | 0        |
| fut10        | 1311 | 273.5  | 90     | 7.473168 | 2.283076 | -1.71074 | Down | 9.94E-23 | 4.59E-22 |
| Tmem150a     | 1482 | 301.5  | 99     | 7.290041 | 2.228471 | -1.70987 | Down | 5.67E-25 | 2.69E-24 |
| Arhgap31     | 4566 | 2737.5 | 899    | 21.49612 | 6.58043  | -1.70782 | Down | #####    | #####    |
| Vcan         | 4175 | 26228  | 8583.5 | 224.2786 | 68.66018 | -1.70775 | Down | 0        | 0        |
| Phc1         | 3917 | 1792.5 | 590    | 16.39996 | 5.024998 | -1.7065  | Down | #####    | #####    |
| Rnf187       | 1905 | 4423.5 | 1453.5 | 83.16004 | 25.48167 | -1.70643 | Down | 0        | 0        |
| Igtp         | 2125 | 401    | 132    | 6.741982 | 2.073063 | -1.70141 | Down | 1.04E-32 | 5.29E-32 |
| Shisa2       | 959  | 106    | 35     | 3.971928 | 1.221312 | -1.70141 | Down | 1.12E-09 | 2.68E-09 |
| Nxpe3        | 3137 | 497    | 163    | 5.663529 | 1.741967 | -1.70098 | Down | 2.48E-40 | 1.33E-39 |
| LOC681410    | 2684 | 7386.5 | 2432.5 | 98.05473 | 30.17636 | -1.70017 | Down | 0        | 0        |

|              |       |         |         |          |          |          |      |          |          |
|--------------|-------|---------|---------|----------|----------|----------|------|----------|----------|
| Wdr6         | 4164  | 4377    | 1444    | 37.61295 | 11.57967 | -1.69964 | Down | 0        | 0        |
| Tbcc         | 1184  | 1347    | 446.5   | 40.78745 | 12.56052 | -1.69923 | Down | #####    | #####    |
| Palmd        | 2262  | 1100    | 363.5   | 17.40147 | 5.360237 | -1.69884 | Down | 1.77E-86 | 1.21E-85 |
| Pcdhga1      | 4548  | 637     | 210.5   | 5.021816 | 1.54696  | -1.69877 | Down | 6.91E-51 | 3.97E-50 |
| Calr         | 1865  | 44052.5 | 14568   | 846.4899 | 260.9904 | -1.6975  | Down | 0        | 0        |
| LOC100911326 | 1008  | 701.5   | 232.5   | 24.99402 | 7.706631 | -1.69741 | Down | 1.49E-55 | 8.82E-55 |
| Ssx2ip       | 2547  | 1621    | 534     | 22.70143 | 6.999826 | -1.69739 | Down | #####    | #####    |
| LOC497848    | 2103  | 829.5   | 274.5   | 14.09854 | 4.347422 | -1.69731 | Down | 1.74E-65 | 1.08E-64 |
| Tmem214      | 2877  | 2878    | 953     | 35.8736  | 11.0665  | -1.69672 | Down | #####    | #####    |
| Gnaz         | 1529  | 36      | 12      | 0.845509 | 0.260851 | -1.69659 | Down | 0.00047  | 0.000834 |
| Fgf22        | 489   | 57      | 19      | 4.162843 | 1.284354 | -1.69653 | Down | 9.78E-06 | 1.96E-05 |
| Srf          | 4106  | 2766    | 919     | 24.175   | 7.460321 | -1.69621 | Down | #####    | #####    |
| Plec         | 14886 | 32714.5 | 10834.5 | 78.69504 | 24.29541 | -1.69559 | Down | 0        | 0        |
| RGD1311849   | 5746  | 1123.5  | 372     | 6.996251 | 2.162112 | -1.69414 | Down | 8.06E-88 | 5.51E-87 |
| Fam125b      | 1376  | 822.5   | 273.5   | 21.45413 | 6.630554 | -1.69405 | Down | 1.50E-64 | 9.30E-64 |
| Rpl18a       | 645   | 15901   | 5280    | 884.0377 | 273.239  | -1.69394 | Down | 0        | 0        |
| Lrrc59       | 2825  | 12369   | 4098.5  | 156.6171 | 48.41501 | -1.69372 | Down | 0        | 0        |
| Ppap2c       | 1603  | 889     | 294     | 19.79226 | 6.119977 | -1.69334 | Down | 4.79E-70 | 3.06E-69 |
| LOC100911928 | 1168  | 177.5   | 59      | 5.431321 | 1.679556 | -1.69322 | Down | 4.63E-15 | 1.94E-14 |
| Steap3       | 2707  | 2309    | 765.5   | 30.53741 | 9.450778 | -1.69207 | Down | #####    | #####    |
| Pcnx13       | 7280  | 3640.5  | 1210.5  | 17.92751 | 5.548446 | -1.69202 | Down | #####    | #####    |
| Tcof1        | 4627  | 3679    | 1223    | 28.47833 | 8.815597 | -1.69173 | Down | #####    | #####    |
| Amot         | 5853  | 918     | 304     | 5.598523 | 1.735314 | -1.68985 | Down | 3.79E-72 | 2.44E-71 |
| Sh3d21       | 1876  | 68.5    | 23      | 1.304903 | 0.405009 | -1.68792 | Down | 1.67E-06 | 3.51E-06 |
| LOC100359678 | 7422  | 1312.5  | 436.5   | 6.323588 | 1.962745 | -1.68787 | Down | #####    | #####    |



|              |      |        |        |          |          |          |      |          |          |
|--------------|------|--------|--------|----------|----------|----------|------|----------|----------|
| Gli3         | 5027 | 1690   | 564.5  | 12.05281 | 3.743665 | -1.68685 | Down | #####    | #####    |
| Ptch1        | 4305 | 769.5  | 256    | 6.39976  | 1.988298 | -1.68648 | Down | 2.56E-60 | 1.55E-59 |
| Cic          | 5429 | 8074.5 | 2698   | 53.42735 | 16.60122 | -1.68629 | Down | 0        | 0        |
| Mapkapk2     | 2909 | 3586.5 | 1195.5 | 44.115   | 13.71079 | -1.68596 | Down | #####    | #####    |
| Trim62       | 1546 | 385.5  | 129.5  | 8.962907 | 2.787026 | -1.68524 | Down | 8.82E-31 | 4.41E-30 |
| Anxa8        | 1856 | 1947.5 | 650    | 37.56911 | 11.6887  | -1.68443 | Down | #####    | #####    |
| RGD1308059   | 1224 | 416.5  | 139    | 12.1479  | 3.781182 | -1.6838  | Down | 3.02E-33 | 1.54E-32 |
| LOC100910951 | 649  | 27     | 9      | 1.482486 | 0.461604 | -1.68329 | Down | 0.002563 | 0.004214 |
| Kif1c        | 4117 | 9668.5 | 3227.5 | 84.07528 | 26.18554 | -1.68291 | Down | 0        | 0        |
| Angpt1       | 1891 | 1043.5 | 348.5  | 19.74045 | 6.150372 | -1.68241 | Down | 6.14E-81 | 4.12E-80 |
| Ckap4        | 2548 | 11345  | 3791.5 | 159.386  | 49.67227 | -1.68201 | Down | 0        | 0        |
| Rai1         | 7600 | 1636   | 548    | 7.720015 | 2.407839 | -1.68086 | Down | #####    | #####    |
| Glb1         | 2833 | 3159   | 1061.5 | 39.92802 | 12.47781 | -1.67804 | Down | #####    | #####    |
| LOC691806    | 1151 | 154.5  | 51.5   | 4.767103 | 1.490331 | -1.67748 | Down | 2.17E-13 | 7.83E-13 |
| Shox2        | 1588 | 844.5  | 284.5  | 19.05502 | 5.958499 | -1.67715 | Down | 4.05E-65 | 2.51E-64 |
| Sardh        | 3071 | 1718   | 577.5  | 20.04574 | 6.269141 | -1.67696 | Down | #####    | #####    |
| RGD1560795   | 771  | 217    | 73     | 10.08839 | 3.155301 | -1.67685 | Down | 6.22E-18 | 2.72E-17 |
| LOC687090    | 1685 | 2715   | 910.5  | 57.67198 | 18.04477 | -1.67629 | Down | #####    | #####    |
| Pcdhgc5      | 3157 | 655    | 219.5  | 7.445576 | 2.3303   | -1.67587 | Down | 2.39E-51 | 1.38E-50 |
| LOC679881    | 1902 | 240.5  | 80.5   | 4.509114 | 1.412349 | -1.67475 | Down | 6.74E-20 | 3.03E-19 |
| Acads        | 1748 | 865.5  | 291    | 17.7368  | 5.556042 | -1.67462 | Down | 1.03E-66 | 6.43E-66 |
| Ubf          | 3204 | 4868   | 1635   | 54.39753 | 17.04233 | -1.67442 | Down | 0        | 0        |
| Neto2        | 1578 | 930.5  | 313    | 21.12375 | 6.61893  | -1.6742  | Down | 1.49E-71 | 9.54E-71 |
| Lphn2        | 5928 | 4548.5 | 1528   | 27.44343 | 8.599856 | -1.67408 | Down | 0        | 0        |
| Vapb         | 732  | 1987.5 | 668.5  | 97.3763  | 30.52805 | -1.67344 | Down | #####    | #####    |

|              |      |         |        |          |          |          |      |          |          |
|--------------|------|---------|--------|----------|----------|----------|------|----------|----------|
| Galk1        | 1486 | 2668.5  | 894.5  | 64.1518  | 20.11208 | -1.67343 | Down | #####    | #####    |
| Extl3        | 3198 | 13183.5 | 4435.5 | 147.7082 | 46.32997 | -1.67273 | Down | 0        | 0        |
| Inpp1        | 4640 | 6200.5  | 2093.5 | 47.88483 | 15.05016 | -1.66979 | Down | 0        | 0        |
| Efna4        | 1199 | 117.5   | 39.5   | 3.512197 | 1.104028 | -1.6696  | Down | 1.98E-10 | 4.88E-10 |
| LOC690801    | 2055 | 1346.5  | 452    | 23.36467 | 7.34654  | -1.66919 | Down | #####    | #####    |
| Dag1         | 5169 | 17446.5 | 5887.5 | 120.9623 | 38.03974 | -1.66898 | Down | 0        | 0        |
| Ilvbl        | 2632 | 1314    | 444    | 17.88817 | 5.626308 | -1.66875 | Down | #####    | 5.70E-99 |
| lqgap1       | 6158 | 22308   | 7518   | 129.5828 | 40.76339 | -1.66853 | Down | 0        | 0        |
| Bcat2        | 1548 | 532     | 179    | 12.27833 | 3.86469  | -1.66769 | Down | 1.10E-41 | 5.97E-41 |
| Numa1        | 7793 | 6887.5  | 2329.5 | 31.69479 | 9.978266 | -1.66738 | Down | 0        | 0        |
| Mum1         | 2463 | 925.5   | 311.5  | 13.43257 | 4.22925  | -1.66726 | Down | 2.83E-71 | 1.82E-70 |
| Sox2         | 2323 | 2209.5  | 744.5  | 33.98268 | 10.69958 | -1.66725 | Down | #####    | #####    |
| LOC310891    | 2079 | 78.5    | 26.5   | 1.35126  | 0.425782 | -1.66612 | Down | 2.17E-07 | 4.76E-07 |
| LOC100361061 | 613  | 3528.5  | 1194.5 | 205.8775 | 64.89281 | -1.66566 | Down | #####    | #####    |
| Mboat7       | 2303 | 921     | 312.5  | 14.33882 | 4.521158 | -1.66516 | Down | 2.82E-70 | 1.80E-69 |
| Cdc42bpb     | 6397 | 5763    | 1950.5 | 32.27149 | 10.17634 | -1.66504 | Down | 0        | 0        |
| Pcdhga5      | 4719 | 558     | 188    | 4.234119 | 1.335436 | -1.66475 | Down | 1.45E-43 | 7.95E-43 |
| Nudc         | 1294 | 2539    | 861    | 70.32446 | 22.18636 | -1.66435 | Down | #####    | #####    |
| Prpf19       | 2156 | 7108    | 2410   | 118.0939 | 37.26086 | -1.6642  | Down | 0        | 0        |
| Cmtm3        | 1519 | 770.5   | 261.5  | 18.15395 | 5.728374 | -1.66409 | Down | 5.34E-59 | 3.23E-58 |
| Mxd4         | 1185 | 252     | 85     | 7.597985 | 2.398632 | -1.6634  | Down | 1.62E-20 | 7.34E-20 |
| LOC100911286 | 1025 | 464.5   | 158    | 16.30682 | 5.149089 | -1.66309 | Down | 5.20E-36 | 2.71E-35 |
| Man2a1       | 6959 | 2185    | 738.5  | 11.21749 | 3.54222  | -1.66302 | Down | #####    | #####    |
| Dpy19l1      | 4663 | 3586.5  | 1212.5 | 27.45511 | 8.677087 | -1.66179 | Down | #####    | #####    |
| Abcb10       | 3460 | 631     | 214    | 6.528106 | 2.063664 | -1.66146 | Down | 1.26E-48 | 7.13E-48 |

|            |      |         |        |          |          |          |      |          |          |
|------------|------|---------|--------|----------|----------|----------|------|----------|----------|
| Hcn4       | 3971 | 35.5    | 12     | 0.321989 | 0.101799 | -1.6613  | Down | 0.000717 | 0.001235 |
| LOC362306  | 879  | 35.5    | 12     | 1.444844 | 0.456817 | -1.66123 | Down | 0.000717 | 0.001235 |
| Eif4ebp2   | 1759 | 2375.5  | 808    | 48.44055 | 15.32095 | -1.66071 | Down | #####    | #####    |
| Fpgs       | 2586 | 915.5   | 311    | 12.68811 | 4.014849 | -1.66006 | Down | 1.59E-69 | 1.01E-68 |
| Nrp1       | 3862 | 1217    | 413    | 11.2636  | 3.567103 | -1.65884 | Down | 4.61E-92 | 3.20E-91 |
| Taar3      | 1029 | 173     | 59     | 6.038325 | 1.912558 | -1.65865 | Down | 2.36E-14 | 9.66E-14 |
| Abcb9      | 3303 | 508     | 173    | 5.507613 | 1.744601 | -1.65853 | Down | 2.90E-39 | 1.55E-38 |
| Rapgef5    | 5460 | 1730    | 587.5  | 11.32384 | 3.588901 | -1.65775 | Down | #####    | #####    |
| Nt5c3l     | 1683 | 1288    | 437    | 27.39138 | 8.681365 | -1.65773 | Down | 2.36E-97 | 1.66E-96 |
| Daglb      | 3019 | 559     | 190    | 6.623937 | 2.101191 | -1.65648 | Down | 3.80E-43 | 2.08E-42 |
| Klc2       | 3008 | 2126.5  | 726    | 25.3801  | 8.053632 | -1.65599 | Down | #####    | #####    |
| Trove2     | 3737 | 1191    | 405    | 11.36593 | 3.611335 | -1.65411 | Down | 6.82E-90 | 4.70E-89 |
| Pcdhga11   | 4688 | 590.5   | 201    | 4.507558 | 1.432818 | -1.65349 | Down | 2.61E-45 | 1.45E-44 |
| Lgr5       | 3130 | 38      | 13     | 0.435162 | 0.13838  | -1.65292 | Down | 0.00041  | 0.000729 |
| RGD1561416 | 945  | 87      | 29.5   | 3.29615  | 1.048425 | -1.65256 | Down | 4.28E-08 | 9.68E-08 |
| Csk        | 2108 | 3164.5  | 1082   | 53.80338 | 17.12833 | -1.65131 | Down | #####    | #####    |
| RT1-T24-3  | 1458 | 248.5   | 85     | 6.132091 | 1.952592 | -1.65099 | Down | 8.17E-20 | 3.66E-19 |
| Adcy2      | 4008 | 27.5    | 9.5    | 0.246592 | 0.078574 | -1.65    | Down | 0.002563 | 0.004214 |
| Slc2a12    | 4118 | 86.5    | 29     | 0.750873 | 0.239271 | -1.64992 | Down | 6.47E-08 | 1.45E-07 |
| Reck       | 3863 | 1970.5  | 672    | 18.24226 | 5.813497 | -1.64981 | Down | #####    | #####    |
| Tpx2       | 3170 | 5726.5  | 1954   | 64.5809  | 20.58458 | -1.64954 | Down | 0        | 0        |
| Fam83d     | 2253 | 1399    | 478    | 22.24428 | 7.091388 | -1.64929 | Down | #####    | #####    |
| Smad6      | 1377 | 431.5   | 149    | 11.28495 | 3.598936 | -1.64876 | Down | 6.54E-33 | 3.33E-32 |
| Chrd       | 3267 | 134     | 46     | 1.470501 | 0.468991 | -1.64868 | Down | 2.40E-11 | 6.14E-11 |
| Tpt1       | 794  | 23613.5 | 8064.5 | 1063.282 | 339.2137 | -1.64826 | Down | 0        | 0        |

|              |      |         |         |          |          |          |      |          |          |
|--------------|------|---------|---------|----------|----------|----------|------|----------|----------|
| Tmem121      | 1587 | 172     | 59      | 3.884712 | 1.239522 | -1.64802 | Down | 3.54E-14 | 1.43E-13 |
| Dlat         | 2628 | 2773    | 947.5   | 37.75277 | 12.0474  | -1.64786 | Down | #####    | #####    |
| Arid1b       | 8301 | 3273    | 1121.5  | 14.13197 | 4.510319 | -1.64766 | Down | #####    | #####    |
| Ppp2r5d      | 2924 | 4006    | 1374    | 49.11    | 15.69538 | -1.64568 | Down | #####    | #####    |
| Flii         | 4035 | 4928.5  | 1689    | 43.74926 | 13.98533 | -1.64534 | Down | 0        | 0        |
| Itpk1        | 1635 | 1622    | 558     | 35.58815 | 11.38009 | -1.64489 | Down | #####    | #####    |
| Fam63a       | 2054 | 756.5   | 259.5   | 13.1902  | 4.220461 | -1.64399 | Down | 3.78E-57 | 2.25E-56 |
| Vim          | 1796 | 20726.5 | 7134    | 413.6006 | 132.3878 | -1.64347 | Down | 0        | 0        |
| Gna12        | 3345 | 9412    | 3230.5  | 100.7102 | 32.24196 | -1.6432  | Down | 0        | 0        |
| Cnm3         | 4107 | 926.5   | 318     | 8.06726  | 2.584443 | -1.64223 | Down | 2.21E-69 | 1.41E-68 |
| Tkt          | 2098 | 7813    | 2686.5  | 133.4858 | 42.77022 | -1.64201 | Down | 0        | 0        |
| Adh5         | 1413 | 2208.5  | 756     | 55.75887 | 17.87065 | -1.64161 | Down | #####    | #####    |
| Mkrr2        | 2234 | 704.5   | 242     | 11.29092 | 3.619476 | -1.64131 | Down | 4.24E-53 | 2.47E-52 |
| Chst2        | 1998 | 6771.5  | 2333.5  | 121.3305 | 38.90364 | -1.64096 | Down | 0        | 0        |
| LOC100360180 | 2148 | 9146.5  | 3149    | 152.6083 | 48.93635 | -1.64085 | Down | 0        | 0        |
| Fbxl18       | 2322 | 157.5   | 54.5    | 2.439135 | 0.782658 | -1.63992 | Down | 5.06E-13 | 1.70E-12 |
| Scap         | 4301 | 2839    | 977.5   | 23.64536 | 7.588016 | -1.63976 | Down | #####    | #####    |
| Pigq         | 3024 | 2690    | 926.5   | 31.85829 | 10.24207 | -1.63716 | Down | #####    | #####    |
| LOC683522    | 1869 | 475     | 165     | 9.123334 | 2.933506 | -1.63694 | Down | 7.10E-36 | 3.70E-35 |
| Telo2        | 3211 | 573.5   | 197.5   | 6.385074 | 2.053113 | -1.63689 | Down | 1.58E-43 | 8.69E-43 |
| E2f1         | 2643 | 1476.5  | 509     | 19.97875 | 6.427729 | -1.63609 | Down | #####    | #####    |
| Bgn          | 2446 | 42414.5 | 14620.5 | 620.3845 | 199.6279 | -1.63585 | Down | 0        | 0        |
| LOC100910032 | 899  | 78      | 27      | 3.121885 | 1.004721 | -1.63562 | Down | 4.33E-07 | 9.39E-07 |
| Acs1         | 3657 | 2192    | 754.5   | 21.42866 | 6.899207 | -1.63504 | Down | #####    | #####    |
| Lsp1         | 1257 | 326     | 112.5   | 9.288965 | 2.991302 | -1.63474 | Down | 1.74E-25 | 8.30E-25 |

|              |      |         |        |          |          |          |      |          |          |
|--------------|------|---------|--------|----------|----------|----------|------|----------|----------|
| Bhlhb9       | 2701 | 235     | 80.5   | 3.100788 | 0.998552 | -1.63473 | Down | 5.15E-19 | 2.28E-18 |
| Arpc1b       | 1536 | 21732.5 | 7493   | 505.9814 | 162.9526 | -1.63463 | Down | 0        | 0        |
| Exoc7        | 2328 | 264     | 91.5   | 4.060109 | 1.307793 | -1.63438 | Down | 7.64E-21 | 3.47E-20 |
| Tmem63a      | 3269 | 3422    | 1182   | 37.4745  | 12.07415 | -1.63399 | Down | #####    | #####    |
| Dis3l        | 3234 | 762     | 263    | 8.441229 | 2.719862 | -1.63392 | Down | 5.07E-57 | 3.02E-56 |
| Rfc2         | 1556 | 1381.5  | 476    | 31.67795 | 10.21692 | -1.63252 | Down | #####    | #####    |
| Lrp10        | 2941 | 7744    | 2683   | 94.39091 | 30.44662 | -1.63237 | Down | 0        | 0        |
| Mrps30       | 1435 | 1245.5  | 432    | 31.07883 | 10.03213 | -1.6313  | Down | 2.30E-91 | 1.59E-90 |
| Nol3         | 1532 | 263.5   | 91     | 6.151067 | 1.986097 | -1.6309  | Down | 1.14E-20 | 5.16E-20 |
| Ii16         | 4985 | 99      | 34     | 0.709605 | 0.229158 | -1.63067 | Down | 9.92E-09 | 2.30E-08 |
| Col18a1      | 5007 | 368     | 127.5  | 2.633972 | 0.851342 | -1.62943 | Down | 2.13E-28 | 1.04E-27 |
| LOC100909797 | 1005 | 84      | 29     | 2.982279 | 0.964296 | -1.62887 | Down | 1.47E-07 | 3.24E-07 |
| Ehmt2        | 4023 | 4496.5  | 1562   | 40.027   | 12.961   | -1.6268  | Down | 0        | 0        |
| Ddb1         | 4249 | 20877.5 | 7241.5 | 175.5042 | 56.8937  | -1.62516 | Down | 0        | 0        |
| Diaph1       | 5588 | 7424.5  | 2577   | 47.5408  | 15.41171 | -1.62514 | Down | 0        | 0        |
| Ajap1        | 2603 | 1155.5  | 402    | 15.90693 | 5.159277 | -1.62441 | Down | 1.54E-84 | 1.04E-83 |
| RGD1304694   | 3211 | 3519    | 1224   | 39.26307 | 12.7396  | -1.62385 | Down | #####    | #####    |
| Scn1a        | 8399 | 998     | 346.5  | 4.243429 | 1.376888 | -1.62382 | Down | 1.10E-73 | 7.13E-73 |
| Ptpn11       | 5526 | 8426.5  | 2929.5 | 54.50311 | 17.68495 | -1.62382 | Down | 0        | 0        |
| Itpkb        | 3951 | 287.5   | 100    | 2.609114 | 0.846616 | -1.62378 | Down | 3.24E-22 | 1.49E-21 |
| Gnb2         | 1670 | 15010   | 5235.5 | 322.2273 | 104.5757 | -1.62353 | Down | 0        | 0        |
| Tecr         | 1178 | 4826.5  | 1684.5 | 147.1462 | 47.78059 | -1.62275 | Down | 0        | 0        |
| RGD1308908   | 7104 | 3457.5  | 1207   | 17.45343 | 5.671802 | -1.62163 | Down | #####    | #####    |
| Nkx6-1       | 3211 | 168.5   | 59     | 1.883739 | 0.61262  | -1.62054 | Down | 1.76E-13 | 6.47E-13 |
| Galnt4       | 2546 | 259.5   | 90.5   | 3.648655 | 1.187296 | -1.61968 | Down | 2.88E-20 | 1.30E-19 |

|              |      |         |        |          |          |          |      |          |          |
|--------------|------|---------|--------|----------|----------|----------|------|----------|----------|
| Kcnk12       | 1900 | 73.5    | 26     | 1.397375 | 0.454977 | -1.61885 | Down | 1.67E-06 | 3.50E-06 |
| Sorcs1       | 4416 | 57.5    | 20     | 0.465473 | 0.151616 | -1.61828 | Down | 1.95E-05 | 3.85E-05 |
| Nin          | 6718 | 351     | 122.5  | 1.870701 | 0.609398 | -1.61812 | Down | 6.57E-27 | 3.18E-26 |
| Tln1         | 8647 | 20217   | 7066.5 | 83.68763 | 27.26256 | -1.61809 | Down | 0        | 0        |
| Gnl1         | 2083 | 2857.5  | 998    | 49.09929 | 16.00352 | -1.61731 | Down | #####    | #####    |
| Osr2         | 1739 | 386.5   | 135.5  | 7.978858 | 2.600669 | -1.6173  | Down | 3.41E-29 | 1.68E-28 |
| Snd1         | 3475 | 13205   | 4616.5 | 136.0472 | 44.34845 | -1.61715 | Down | 0        | 0        |
| Fgf2         | 1016 | 243.5   | 84.5   | 8.567253 | 2.793146 | -1.61694 | Down | 3.09E-19 | 1.37E-18 |
| Zfp1         | 3088 | 1225    | 431.5  | 14.26566 | 4.652026 | -1.61662 | Down | 3.16E-88 | 2.17E-87 |
| Mapre2       | 2463 | 3250    | 1137   | 47.29548 | 15.42339 | -1.61658 | Down | #####    | #####    |
| Ncdn         | 3662 | 4015.5  | 1407   | 39.3163  | 12.82161 | -1.61655 | Down | #####    | #####    |
| Ppm1f        | 1935 | 1268    | 443    | 23.44924 | 7.649642 | -1.61608 | Down | 3.76E-92 | 2.61E-91 |
| Plxnb1       | 8395 | 655.5   | 229.5  | 2.793179 | 0.911486 | -1.61562 | Down | 2.06E-48 | 1.17E-47 |
| LOC100910912 | 789  | 83      | 29     | 3.756274 | 1.226004 | -1.61534 | Down | 2.20E-07 | 4.84E-07 |
| LOC100909460 | 3300 | 2501    | 874    | 27.1164  | 8.850901 | -1.61527 | Down | #####    | #####    |
| LOC363527    | 1427 | 225     | 79     | 5.648897 | 1.843909 | -1.6152  | Down | 1.44E-17 | 6.28E-17 |
| Plxna3       | 7376 | 1138    | 397.5  | 5.522186 | 1.803092 | -1.61477 | Down | 4.65E-83 | 3.14E-82 |
| Penk         | 1446 | 6632.5  | 2321.5 | 164.203  | 53.61717 | -1.61471 | Down | 0        | 0        |
| St3gal5      | 2723 | 6129.5  | 2146.5 | 80.53209 | 26.30196 | -1.61439 | Down | 0        | 0        |
| Myo1d        | 5303 | 3552.5  | 1248   | 24.0342  | 7.856014 | -1.61322 | Down | #####    | #####    |
| Psm3         | 2147 | 6936    | 2437   | 115.8916 | 37.88177 | -1.6132  | Down | 0        | 0        |
| Nedd4        | 5373 | 64672.5 | 22666  | 430.2854 | 140.7821 | -1.61183 | Down | 0        | 0        |
| Rplp0        | 1093 | 61433   | 21580  | 2012.933 | 658.6465 | -1.61172 | Down | 0        | 0        |
| Sipa1        | 3123 | 2089    | 736.5  | 24.00932 | 7.856207 | -1.61169 | Down | #####    | #####    |
| Mocos        | 3037 | 549.5   | 192.5  | 6.484546 | 2.121999 | -1.61158 | Down | 7.81E-41 | 4.21E-40 |

|              |      |         |        |          |          |          |      |          |          |
|--------------|------|---------|--------|----------|----------|----------|------|----------|----------|
| Hdac6        | 4145 | 1495.5  | 524    | 12.91564 | 4.226753 | -1.6115  | Down | #####    | #####    |
| Wbscr17      | 1797 | 79      | 28     | 1.577895 | 0.516711 | -1.61057 | Down | 5.65E-07 | 1.22E-06 |
| Ccdc6        | 1633 | 829.5   | 292    | 18.20931 | 5.964451 | -1.61022 | Down | 3.40E-60 | 2.07E-59 |
| Kpnb1        | 2991 | 18912   | 6636   | 226.0074 | 74.04586 | -1.60988 | Down | 0        | 0        |
| Mtss1l       | 3447 | 1342    | 472.5  | 13.9697  | 4.578218 | -1.60944 | Down | 1.59E-96 | 1.12E-95 |
| Adra1a       | 1428 | 28.5    | 10     | 0.717173 | 0.235062 | -1.60928 | Down | 0.003378 | 0.005506 |
| Vamp5        | 309  | 500.5   | 176    | 58.05886 | 19.031   | -1.60916 | Down | 5.17E-37 | 2.72E-36 |
| Hr           | 5233 | 4788    | 1683.5 | 32.78284 | 10.74761 | -1.60892 | Down | 0        | 0        |
| LOC100911724 | 1619 | 328     | 116    | 7.209806 | 2.364897 | -1.60818 | Down | 1.12E-24 | 5.28E-24 |
| Hspa12b      | 3350 | 193     | 68     | 2.063424 | 0.677702 | -1.60632 | Down | 3.27E-15 | 1.38E-14 |
| LOC100362543 | 1161 | 161     | 57     | 4.973548 | 1.633719 | -1.60612 | Down | 7.55E-13 | 2.43E-12 |
| LOC100362423 | 605  | 241     | 85.5   | 14.29016 | 4.695243 | -1.60575 | Down | 1.33E-18 | 5.87E-18 |
| RGD1310444   | 4321 | 4366    | 1538   | 36.17633 | 11.88711 | -1.60565 | Down | 0        | 0        |
| Wdr1         | 2844 | 15980.5 | 5626.5 | 200.9137 | 66.05909 | -1.60475 | Down | 0        | 0        |
| Pcxl2        | 6378 | 117     | 41     | 0.658217 | 0.216457 | -1.60449 | Down | 7.79E-10 | 1.88E-09 |
| Adam15       | 2815 | 3066.5  | 1081.5 | 39.03327 | 12.83861 | -1.60422 | Down | #####    | #####    |
| Serpina5     | 2187 | 139.5   | 49     | 2.274735 | 0.748447 | -1.60373 | Down | 2.41E-11 | 6.16E-11 |
| Aacs         | 3190 | 2913    | 1028.5 | 32.67298 | 10.75605 | -1.60295 | Down | #####    | #####    |
| Fam101b      | 1384 | 163.5   | 58     | 4.23619  | 1.394606 | -1.60291 | Down | 6.59E-13 | 2.15E-12 |
| MGC108823    | 1628 | 88      | 31     | 1.929298 | 0.635191 | -1.60281 | Down | 1.12E-07 | 2.49E-07 |
| Lpcat4       | 2488 | 1718.5  | 608    | 24.75694 | 8.151238 | -1.60274 | Down | #####    | #####    |
| Prex1        | 5438 | 1139.5  | 402.5  | 7.513081 | 2.473895 | -1.60262 | Down | 8.34E-82 | 5.61E-81 |
| Dock7        | 6759 | 4298    | 1515   | 22.72622 | 7.487102 | -1.60188 | Down | #####    | #####    |
| Zfp362       | 1890 | 456     | 162    | 8.671037 | 2.856965 | -1.60172 | Down | 1.77E-33 | 9.05E-33 |
| LOC100910536 | 5009 | 777.5   | 275    | 5.559618 | 1.832077 | -1.60151 | Down | 3.72E-56 | 2.20E-55 |

|              |      |        |        |          |          |          |      |          |          |
|--------------|------|--------|--------|----------|----------|----------|------|----------|----------|
| Nbeal2-ps1   | 8696 | 826    | 292.5  | 3.402342 | 1.12171  | -1.60083 | Down | 1.10E-59 | 6.68E-59 |
| Top2a        | 4987 | 13507  | 4766   | 96.68868 | 31.88146 | -1.60063 | Down | 0        | 0        |
| Rrbp1        | 5141 | 12018  | 4245.5 | 83.56913 | 27.57692 | -1.59951 | Down | 0        | 0        |
| Chpf2        | 3763 | 1975   | 700    | 18.80846 | 6.208044 | -1.59917 | Down | #####    | #####    |
| Cpt1a        | 4356 | 2579.5 | 913.5  | 21.19344 | 6.998577 | -1.59848 | Down | #####    | #####    |
| Sc5dl        | 2185 | 5081   | 1803.5 | 83.37227 | 27.54905 | -1.59757 | Down | 0        | 0        |
| Sptbn1       | 7332 | 27032  | 9572.5 | 131.8619 | 43.60671 | -1.59641 | Down | 0        | 0        |
| Stat5b       | 2671 | 610.5  | 217    | 8.196331 | 2.712444 | -1.59538 | Down | 3.82E-44 | 2.11E-43 |
| LOC100192314 | 1494 | 178    | 63     | 4.277916 | 1.415709 | -1.59538 | Down | 4.64E-14 | 1.85E-13 |
| Cdon         | 4573 | 340    | 121    | 2.663975 | 0.882026 | -1.59469 | Down | 2.61E-25 | 1.24E-24 |
| Tmem51       | 2034 | 625.5  | 222    | 11.00935 | 3.645758 | -1.59444 | Down | 2.78E-45 | 1.54E-44 |
| Duoxa1       | 1665 | 103    | 36.5   | 2.207418 | 0.731092 | -1.59423 | Down | 7.60E-09 | 1.77E-08 |
| Ap2a2        | 3258 | 6203   | 2205   | 68.20617 | 22.59743 | -1.59374 | Down | 0        | 0        |
| Agpat2       | 1362 | 1005   | 357.5  | 26.4355  | 8.762434 | -1.59307 | Down | 9.53E-72 | 6.13E-71 |
| H1fx         | 1058 | 387.5  | 139    | 13.19719 | 4.374448 | -1.59306 | Down | 3.11E-28 | 1.52E-27 |
| Rcc1         | 1584 | 1321.5 | 469.5  | 29.8661  | 9.900163 | -1.59298 | Down | 8.38E-94 | 5.84E-93 |
| Hcfc1r1      | 629  | 2844.5 | 1012.5 | 162.1615 | 53.76057 | -1.59281 | Down | #####    | #####    |
| Hpd1         | 1631 | 38     | 13.5   | 0.83405  | 0.276623 | -1.59221 | Down | 0.00041  | 0.000729 |
| Gsn          | 2612 | 12095  | 4306   | 165.958  | 55.05931 | -1.59176 | Down | 0        | 0        |
| Bak1         | 1923 | 1925.5 | 687.5  | 35.93069 | 11.92105 | -1.59171 | Down | #####    | #####    |
| Lss          | 2851 | 2306.5 | 817.5  | 28.91204 | 9.595325 | -1.59127 | Down | #####    | #####    |
| Chml         | 1866 | 151    | 53.5   | 2.900866 | 0.962779 | -1.59121 | Down | 2.87E-12 | 8.34E-12 |
| Nr2f6        | 1775 | 1324.5 | 474    | 26.74965 | 8.881209 | -1.59069 | Down | 6.53E-93 | 4.54E-92 |
| Fam102b      | 5732 | 4272   | 1514.5 | 26.58904 | 8.82934  | -1.59045 | Down | #####    | #####    |
| Elmo2        | 4577 | 3057.5 | 1089   | 23.94085 | 7.949976 | -1.59045 | Down | #####    | #####    |



|              |      |         |        |          |          |          |      |          |          |
|--------------|------|---------|--------|----------|----------|----------|------|----------|----------|
| Slc26a6      | 2543 | 249.5   | 88.5   | 3.503453 | 1.163501 | -1.5903  | Down | 4.04E-19 | 1.79E-18 |
| Xdh          | 4198 | 2466    | 876.5  | 20.99884 | 6.974795 | -1.59009 | Down | #####    | #####    |
| Apol3        | 1455 | 71.5    | 25.5   | 1.75507  | 0.582965 | -1.59005 | Down | 1.92E-06 | 4.01E-06 |
| Lasp1        | 3425 | 11306.5 | 4028.5 | 118.0977 | 39.25171 | -1.58915 | Down | 0        | 0        |
| Fam125a      | 1102 | 1515.5  | 542.5  | 49.43044 | 16.43139 | -1.58894 | Down | #####    | #####    |
| Ndst1        | 4051 | 1557.5  | 557.5  | 13.76314 | 4.580374 | -1.58727 | Down | #####    | #####    |
| 2-Sep        | 3225 | 20782   | 7399.5 | 229.9999 | 76.58393 | -1.58652 | Down | 0        | 0        |
| LOC100910833 | 1251 | 432     | 154    | 12.34947 | 4.114284 | -1.58574 | Down | 1.18E-31 | 5.93E-31 |
| Pa2g4        | 1602 | 7940    | 2843.5 | 177.6787 | 59.23836 | -1.58467 | Down | 0        | 0        |
| Calml4       | 896  | 306.5   | 109.5  | 12.26074 | 4.089739 | -1.58397 | Down | 6.61E-23 | 3.06E-22 |
| Mtor         | 8554 | 4723.5  | 1690   | 19.7616  | 6.592286 | -1.58385 | Down | 0        | 0        |
| RGD1311078   | 872  | 252.5   | 90.5   | 10.37634 | 3.463482 | -1.583   | Down | 4.57E-19 | 2.03E-18 |
| Cobl         | 4777 | 223.5   | 80     | 1.674959 | 0.559126 | -1.58288 | Down | 6.06E-17 | 2.62E-16 |
| Mbnl1        | 1164 | 2323.5  | 833    | 71.62543 | 23.9129  | -1.58268 | Down | #####    | #####    |
| Sema6c       | 3272 | 56      | 20     | 0.612777 | 0.204626 | -1.58237 | Down | 2.93E-05 | 5.70E-05 |
| Fdxr         | 1786 | 212.5   | 76.5   | 4.258968 | 1.423763 | -1.5808  | Down | 3.39E-16 | 1.45E-15 |
| LOC100359865 | 737  | 388.5   | 138.5  | 18.83738 | 6.301661 | -1.57979 | Down | 1.11E-28 | 5.42E-28 |
| Xyylt1       | 2820 | 2073.5  | 744.5  | 26.31235 | 8.805578 | -1.57925 | Down | #####    | #####    |
| Bcl9l        | 5711 | 5682.5  | 2048   | 35.71978 | 11.9557  | -1.57902 | Down | 0        | 0        |
| Mcm2         | 3261 | 5786    | 2078.5 | 63.5527  | 21.27419 | -1.57885 | Down | 0        | 0        |
| Creld2       | 1368 | 1705.5  | 611    | 44.55663 | 14.92233 | -1.57817 | Down | #####    | #####    |
| Pcdhga2      | 4718 | 614     | 219.5  | 4.655732 | 1.56044  | -1.57706 | Down | 2.92E-44 | 1.61E-43 |
| Zfp277       | 1593 | 863.5   | 310.5  | 19.36261 | 6.489802 | -1.57703 | Down | 6.70E-61 | 4.08E-60 |
| Gpam         | 2646 | 837     | 302    | 11.34237 | 3.802085 | -1.57686 | Down | 9.52E-59 | 5.73E-58 |
| Adam12       | 2646 | 6222    | 2240   | 84.28247 | 28.27043 | -1.57594 | Down | 0        | 0        |

|              |      |         |         |          |          |          |      |          |          |
|--------------|------|---------|---------|----------|----------|----------|------|----------|----------|
| Man2b1       | 3150 | 2685.5  | 967     | 30.55969 | 10.25094 | -1.57587 | Down | #####    | #####    |
| Aph1a        | 2069 | 2784    | 999.5   | 48.14413 | 16.15189 | -1.57566 | Down | #####    | #####    |
| Nmral1       | 1016 | 405     | 145.5   | 14.27132 | 4.787925 | -1.57565 | Down | 1.33E-29 | 6.60E-29 |
| Mbd3         | 1744 | 3876    | 1394.5  | 79.52511 | 26.6896  | -1.57513 | Down | #####    | #####    |
| Whsc1        | 5698 | 4793    | 1725    | 30.06021 | 10.10066 | -1.57341 | Down | 0        | 0        |
| Eef2k        | 2175 | 1020.5  | 368.5   | 16.80844 | 5.655536 | -1.57145 | Down | 3.27E-71 | 2.10E-70 |
| Fam211a      | 1901 | 570.5   | 206     | 10.72833 | 3.611301 | -1.57083 | Down | 1.84E-40 | 9.92E-40 |
| Fam20b       | 5051 | 3513.5  | 1266    | 24.87481 | 8.37656  | -1.57026 | Down | #####    | #####    |
| Nrp2         | 3338 | 14231   | 5145    | 152.8545 | 51.48288 | -1.56999 | Down | 0        | 0        |
| Strn         | 2985 | 1595.5  | 575.5   | 19.1422  | 6.44729  | -1.56999 | Down | #####    | #####    |
| Ncapd2       | 4579 | 4664    | 1688    | 36.461   | 12.28607 | -1.56933 | Down | 0        | 0        |
| Cdipt        | 1890 | 2520    | 910.5   | 47.72888 | 16.0923  | -1.56849 | Down | #####    | #####    |
| Vangl2       | 2813 | 68.5    | 25      | 0.874933 | 0.295119 | -1.56788 | Down | 6.34E-06 | 1.29E-05 |
| LOC100911431 | 7029 | 7754    | 2806    | 39.52897 | 13.33632 | -1.56755 | Down | 0        | 0        |
| LOC100912309 | 377  | 36      | 13      | 3.416967 | 1.153657 | -1.5665  | Down | 0.000936 | 0.001595 |
| Akr1a1       | 1124 | 10738.5 | 3871    | 340.8196 | 115.0722 | -1.56647 | Down | 0        | 0        |
| LOC683720    | 1935 | 306.5   | 111     | 5.676436 | 1.916608 | -1.56643 | Down | 2.38E-22 | 1.10E-21 |
| Zcchc14      | 5409 | 4219.5  | 1530.5  | 27.94967 | 9.438374 | -1.56622 | Down | #####    | #####    |
| Smo          | 2382 | 112     | 41      | 1.689244 | 0.570512 | -1.56605 | Down | 5.61E-09 | 1.31E-08 |
| Dagla        | 5568 | 1699    | 616.5   | 10.94544 | 3.696735 | -1.56601 | Down | #####    | #####    |
| Itgb8        | 2791 | 744     | 269     | 9.495014 | 3.208832 | -1.56512 | Down | 2.92E-52 | 1.69E-51 |
| Eif4g1       | 5388 | 28790   | 10444.5 | 191.4084 | 64.69651 | -1.56489 | Down | 0        | 0        |
| Ywhaq        | 2099 | 13829   | 5003.5  | 235.2922 | 79.54972 | -1.56452 | Down | 0        | 0        |
| Efr3b        | 2600 | 135     | 49      | 1.853344 | 0.62679  | -1.56408 | Down | 1.17E-10 | 2.89E-10 |
| Tbc1d16      | 2301 | 239     | 87      | 3.72595  | 1.260388 | -1.56374 | Down | 1.05E-17 | 4.61E-17 |

|              |       |         |        |          |          |          |      |          |          |
|--------------|-------|---------|--------|----------|----------|----------|------|----------|----------|
| Parp14       | 7087  | 1689    | 610.5  | 8.5127   | 2.880316 | -1.56339 | Down | #####    | #####    |
| LOC100360417 | 3722  | 366     | 133    | 3.519179 | 1.193269 | -1.56032 | Down | 2.32E-26 | 1.12E-25 |
| Man2a2       | 4200  | 1604.5  | 584    | 13.6921  | 4.643214 | -1.56015 | Down | #####    | #####    |
| Nadk         | 3443  | 2313.5  | 841    | 24.02439 | 8.149436 | -1.55973 | Down | #####    | #####    |
| Barx2-ps1    | 873   | 48      | 17.5   | 1.97009  | 0.668751 | -1.55872 | Down | 0.000101 | 0.000189 |
| Phospho1     | 1999  | 329     | 120.5  | 5.912235 | 2.006934 | -1.55871 | Down | 9.87E-24 | 4.61E-23 |
| Nacc2        | 3165  | 1499.5  | 545    | 16.97143 | 5.763006 | -1.55822 | Down | #####    | #####    |
| Stxbp1       | 3546  | 4235.5  | 1543.5 | 42.76995 | 14.52434 | -1.55813 | Down | #####    | #####    |
| Dpy19l3      | 7610  | 2543    | 924.5  | 11.95195 | 4.059482 | -1.55788 | Down | #####    | #####    |
| Got2         | 2372  | 9900    | 3602   | 149.3175 | 50.72268 | -1.55768 | Down | 0        | 0        |
| Glipr2       | 680   | 898     | 326.5  | 47.34684 | 16.08683 | -1.55739 | Down | 2.36E-62 | 1.45E-61 |
| Celsr1       | 9228  | 457     | 167    | 1.773281 | 0.602644 | -1.55704 | Down | 2.91E-32 | 1.47E-31 |
| Pdia4        | 2398  | 11929.5 | 4343   | 178.1015 | 60.53529 | -1.55685 | Down | 0        | 0        |
| LOC100910198 | 756   | 30.5    | 11     | 1.439464 | 0.489359 | -1.55657 | Down | 0.002887 | 0.004723 |
| Mef2c        | 1899  | 1832    | 667.5  | 34.50896 | 11.7381  | -1.55577 | Down | #####    | #####    |
| Aatk         | 5297  | 477     | 174.5  | 3.2313   | 1.099613 | -1.55512 | Down | 1.10E-33 | 5.62E-33 |
| Yif1a        | 1109  | 787.5   | 288    | 25.44351 | 8.666277 | -1.55381 | Down | 3.09E-54 | 1.81E-53 |
| Ttc13        | 3306  | 2386.5  | 871    | 25.87253 | 8.812981 | -1.55372 | Down | #####    | #####    |
| Dbn1         | 2697  | 4138.5  | 1514.5 | 54.99476 | 18.74185 | -1.55303 | Down | #####    | #####    |
| LOC690911    | 11965 | 2669.5  | 979.5  | 7.99739  | 2.727792 | -1.5518  | Down | #####    | #####    |
| Rnf26        | 2222  | 2515.5  | 919.5  | 40.46036 | 13.81095 | -1.5507  | Down | #####    | #####    |
| Fkbp9        | 3028  | 4547.5  | 1662.5 | 53.71305 | 18.34548 | -1.54985 | Down | #####    | #####    |
| Gp1bb        | 947   | 62      | 23     | 2.35423  | 0.80422  | -1.54959 | Down | 1.88E-05 | 3.70E-05 |
| Cicn4        | 4415  | 328.5   | 119.5  | 2.652401 | 0.906427 | -1.54904 | Down | 7.71E-24 | 3.61E-23 |
| Gatsl2       | 4257  | 467.5   | 171.5  | 3.937563 | 1.345781 | -1.54886 | Down | 7.73E-33 | 3.94E-32 |

|              |      |        |        |          |          |          |      |          |          |
|--------------|------|--------|--------|----------|----------|----------|------|----------|----------|
| Elac2        | 2957 | 897    | 329.5  | 10.85981 | 3.714983 | -1.54757 | Down | 2.28E-61 | 1.39E-60 |
| Gpr64        | 4524 | 84     | 31     | 0.663396 | 0.226987 | -1.54726 | Down | 5.44E-07 | 1.17E-06 |
| Clstn1       | 4408 | 7906   | 2898   | 64.14389 | 21.9617  | -1.54632 | Down | 0        | 0        |
| AcsI3        | 2779 | 4488   | 1643   | 57.71413 | 19.76388 | -1.54606 | Down | #####    | #####    |
| Col4a2       | 6432 | 9262.5 | 3404.5 | 51.65505 | 17.68956 | -1.54601 | Down | 0        | 0        |
| Trak2        | 6041 | 3184   | 1166.5 | 18.82677 | 6.447867 | -1.54589 | Down | #####    | #####    |
| LOC683923    | 3034 | 248    | 91     | 2.927766 | 1.002868 | -1.54567 | Down | 4.08E-18 | 1.79E-17 |
| LOC100362733 | 979  | 630    | 231.5  | 22.97604 | 7.875992 | -1.5446  | Down | 1.23E-43 | 6.77E-43 |
| Vax2         | 879  | 344    | 127    | 14.03391 | 4.81459  | -1.54343 | Down | 2.50E-24 | 1.18E-23 |
| Fam114a111   | 1701 | 41     | 15     | 0.856432 | 0.293887 | -1.54308 | Down | 0.00046  | 0.000817 |
| LOC100910501 | 1023 | 27.5   | 10     | 0.961074 | 0.329881 | -1.5427  | Down | 0.005098 | 0.008182 |
| Acpl2        | 2859 | 1462   | 538.5  | 18.31523 | 6.288334 | -1.54229 | Down | 2.11E-98 | 1.49E-97 |
| Oasl2        | 1750 | 613    | 225.5  | 12.52256 | 4.301872 | -1.54149 | Down | 1.93E-42 | 1.05E-41 |
| Itns1        | 4025 | 1540.5 | 567    | 13.70219 | 4.707658 | -1.54132 | Down | #####    | #####    |
| LOC100911062 | 1285 | 79.5   | 29.5   | 2.220743 | 0.763316 | -1.54069 | Down | 1.08E-06 | 2.29E-06 |
| Fam129b      | 3678 | 15196  | 5604   | 148.0508 | 50.89883 | -1.54039 | Down | 0        | 0        |
| Sft2d2       | 5083 | 1081.5 | 397    | 7.595422 | 2.612053 | -1.53995 | Down | 1.88E-73 | 1.22E-72 |
| Ykt6         | 597  | 1622   | 598.5  | 97.26621 | 33.47145 | -1.53901 | Down | #####    | #####    |
| Efna3        | 1696 | 73     | 27     | 1.546622 | 0.533104 | -1.53663 | Down | 3.18E-06 | 6.58E-06 |
| 8-Sep        | 4008 | 5928   | 2190.5 | 52.92476 | 18.2464  | -1.53633 | Down | 0        | 0        |
| Nlgn2        | 3993 | 998    | 370.5  | 8.965253 | 3.091451 | -1.53606 | Down | 5.15E-67 | 3.23E-66 |
| Apeh         | 2381 | 519    | 193    | 7.813842 | 2.694563 | -1.53598 | Down | 1.63E-35 | 8.47E-35 |
| Scarb2       | 2070 | 2819.5 | 1043.5 | 48.76349 | 16.81724 | -1.53586 | Down | #####    | #####    |
| Cpd          | 4377 | 4088.5 | 1511.5 | 33.39813 | 11.52662 | -1.5348  | Down | #####    | #####    |
| LOC686590    | 4465 | 6128   | 2270.5 | 49.22676 | 16.99418 | -1.5344  | Down | 0        | 0        |

|           |       |         |         |          |          |          |      |          |          |
|-----------|-------|---------|---------|----------|----------|----------|------|----------|----------|
| Cobra1    | 2545  | 2540    | 938.5   | 35.66899 | 12.31622 | -1.53411 | Down | #####    | #####    |
| Klh5      | 3421  | 670.5   | 248     | 7.017956 | 2.424534 | -1.53334 | Down | 1.14E-45 | 6.35E-45 |
| Megf8     | 11587 | 4774    | 1770.5  | 14.7456  | 5.094261 | -1.53334 | Down | 0        | 0        |
| Col16a1   | 5241  | 3873.5  | 1436    | 26.46641 | 9.143648 | -1.53332 | Down | #####    | #####    |
| Lepre1    | 2524  | 2555    | 946.5   | 36.25022 | 12.52487 | -1.53319 | Down | #####    | #####    |
| Zbtb2     | 3068  | 496.5   | 184     | 5.800491 | 2.004685 | -1.5328  | Down | 3.92E-34 | 2.02E-33 |
| Serpinf1  | 1434  | 1148    | 426.5   | 28.66454 | 9.90699  | -1.53275 | Down | 1.03E-76 | 6.79E-76 |
| Chaf1b    | 1958  | 768.5   | 285     | 14.0609  | 4.861053 | -1.53235 | Down | 6.65E-52 | 3.84E-51 |
| A2ld1     | 1179  | 107.5   | 40      | 3.258058 | 1.126609 | -1.53203 | Down | 2.07E-08 | 4.75E-08 |
| Stard8    | 4777  | 105     | 39      | 0.787127 | 0.272197 | -1.53195 | Down | 2.40E-08 | 5.49E-08 |
| Copg1     | 2625  | 7341    | 2722.5  | 100.0472 | 34.60306 | -1.53171 | Down | 0        | 0        |
| Arf1      | 900   | 11927.5 | 4435    | 475.5273 | 164.4958 | -1.53148 | Down | 0        | 0        |
| Cdk5rap2  | 5654  | 2765    | 1026    | 17.50694 | 6.057724 | -1.53108 | Down | #####    | #####    |
| Cbx3      | 1745  | 3915    | 1443.5  | 79.78208 | 27.61645 | -1.53054 | Down | #####    | #####    |
| Atp1a1    | 3636  | 48639   | 18042.5 | 478.4544 | 165.6481 | -1.53026 | Down | 0        | 0        |
| Adamts4   | 3339  | 1036    | 384.5   | 11.11355 | 3.848002 | -1.53014 | Down | 1.60E-69 | 1.02E-68 |
| Ergic1    | 2828  | 4220.5  | 1568.5  | 53.41649 | 18.50642 | -1.52926 | Down | #####    | #####    |
| Ctdspl    | 4123  | 1038    | 384     | 8.99218  | 3.115847 | -1.52905 | Down | 7.51E-70 | 4.78E-69 |
| Ap1s1     | 1302  | 5659    | 2100.5  | 155.6851 | 53.94789 | -1.52899 | Down | 0        | 0        |
| Gcn1l1    | 8538  | 8165.5  | 3033    | 34.2049  | 11.86071 | -1.52801 | Down | 0        | 0        |
| Vars      | 3980  | 8469.5  | 3152    | 76.25006 | 26.44056 | -1.52799 | Down | 0        | 0        |
| Pald      | 4213  | 688     | 256     | 5.841233 | 2.027017 | -1.52691 | Down | 1.71E-46 | 9.60E-46 |
| Dnm1      | 3221  | 1913    | 711     | 21.257   | 7.382063 | -1.52584 | Down | #####    | #####    |
| LOC686310 | 3904  | 1391.5  | 519     | 12.76543 | 4.434082 | -1.52553 | Down | 8.29E-92 | 5.75E-91 |
| Pcdha5    | 5385  | 37.5    | 14      | 0.248814 | 0.086465 | -1.52488 | Down | 0.001195 | 0.002017 |

|              |       |         |        |          |          |          |      |          |          |
|--------------|-------|---------|--------|----------|----------|----------|------|----------|----------|
| Abcc1        | 4981  | 1993    | 742    | 14.28813 | 4.972779 | -1.52269 | Down | #####    | #####    |
| RGD1565043   | 5460  | 3118.5  | 1164.5 | 20.45931 | 7.130493 | -1.52068 | Down | #####    | #####    |
| Pou3f2       | 1814  | 116     | 43.5   | 2.288865 | 0.798388 | -1.51947 | Down | 4.19E-09 | 9.86E-09 |
| LOC365077    | 862   | 460.5   | 174    | 19.22631 | 6.70801  | -1.51913 | Down | 6.93E-31 | 3.47E-30 |
| Stat2        | 3464  | 1284.5  | 481    | 13.26918 | 4.633388 | -1.51794 | Down | 2.22E-84 | 1.51E-83 |
| Phyh         | 1198  | 2307.5  | 864    | 69.04822 | 24.11395 | -1.51774 | Down | #####    | #####    |
| Ssc5d        | 4495  | 573.5   | 215.5  | 4.580054 | 1.599935 | -1.51735 | Down | 1.58E-38 | 8.41E-38 |
| Smarcc1      | 3670  | 5316    | 1991   | 51.84597 | 18.11478 | -1.51706 | Down | 0        | 0        |
| Ankrd27      | 4280  | 1754.5  | 658    | 14.67471 | 5.127996 | -1.51687 | Down | #####    | #####    |
| Ep400        | 10610 | 4948    | 1857   | 16.69295 | 5.84297  | -1.51447 | Down | 0        | 0        |
| Ptk2b        | 3907  | 400.5   | 150.5  | 3.673877 | 1.286656 | -1.51368 | Down | 2.07E-27 | 1.01E-26 |
| Ccdc102a     | 2299  | 1792.5  | 675.5  | 27.98415 | 9.802584 | -1.51338 | Down | #####    | #####    |
| Ralbp1       | 3622  | 5017.5  | 1887   | 49.57922 | 17.37482 | -1.51274 | Down | 0        | 0        |
| Nit2         | 1054  | 541     | 203    | 18.35223 | 6.432849 | -1.51243 | Down | 1.82E-36 | 9.52E-36 |
| Itpril2      | 1926  | 1088    | 409.5  | 20.24824 | 7.098831 | -1.51214 | Down | 2.11E-71 | 1.35E-70 |
| LOC100911603 | 1058  | 143     | 53     | 4.814806 | 1.688659 | -1.51116 | Down | 6.57E-11 | 1.64E-10 |
| Nomo1        | 4201  | 7859.5  | 2953.5 | 66.88394 | 23.46018 | -1.51145 | Down | 0        | 0        |
| Acot11       | 2052  | 53.5    | 20     | 0.932526 | 0.327162 | -1.51114 | Down | 9.61E-05 | 0.000179 |
| Mlec         | 1788  | 5684    | 2142   | 113.818  | 39.93504 | -1.511   | Down | 0        | 0        |
| Rnase12      | 438   | 29      | 11     | 2.388848 | 0.838482 | -1.51046 | Down | 0.004324 | 0.006968 |
| B3galt-ps1   | 3394  | 1284.5  | 484    | 13.55265 | 4.7574   | -1.51033 | Down | 1.37E-83 | 9.27E-83 |
| Zmym3        | 5473  | 1227.5  | 463    | 8.029809 | 2.820646 | -1.50934 | Down | 7.81E-80 | 5.22E-79 |
| Dnaaf3       | 2160  | 142.5   | 53.5   | 2.358177 | 0.828817 | -1.50855 | Down | 9.64E-11 | 2.40E-10 |
| Rpl13a       | 690   | 12110.5 | 4552   | 626.2496 | 220.1362 | -1.50834 | Down | 0        | 0        |
| Flnb         | 8861  | 9390.5  | 3536   | 37.89403 | 13.32084 | -1.50829 | Down | 0        | 0        |

|              |      |         |        |          |          |          |      |          |          |
|--------------|------|---------|--------|----------|----------|----------|------|----------|----------|
| Mpz1         | 2291 | 2864.5  | 1082.5 | 44.79419 | 15.76568 | -1.50652 | Down | #####    | #####    |
| LOC100911372 | 1082 | 17690.5 | 6669.5 | 584.527  | 205.7484 | -1.50639 | Down | 0        | 0        |
| Hdac5        | 3754 | 2650.5  | 1005   | 25.31833 | 8.914875 | -1.5059  | Down | #####    | #####    |
| Arsa         | 1524 | 654     | 247.5  | 15.3874  | 5.418823 | -1.5057  | Down | 2.58E-43 | 1.42E-42 |
| Selp         | 3185 | 67      | 25     | 0.75292  | 0.265171 | -1.50557 | Down | 9.38E-06 | 1.88E-05 |
| Papd7        | 3819 | 2753.5  | 1040   | 25.79139 | 9.085384 | -1.50527 | Down | #####    | #####    |
| Lama4        | 6057 | 5310    | 2004   | 31.35594 | 11.04878 | -1.50485 | Down | 0        | 0        |
| Tcf19        | 1616 | 2201.5  | 832.5  | 48.79219 | 17.20821 | -1.50355 | Down | #####    | #####    |
| LOC100911261 | 4389 | 3224.5  | 1217.5 | 26.27157 | 9.267691 | -1.50322 | Down | #####    | #####    |
| LOC100911205 | 3951 | 496     | 188    | 4.496939 | 1.586819 | -1.50281 | Down | 4.47E-33 | 2.28E-32 |
| Adamts7      | 5664 | 3329    | 1261   | 21.05468 | 7.433522 | -1.50202 | Down | #####    | #####    |
| Wdr46        | 2276 | 1128.5  | 429    | 17.76884 | 6.280378 | -1.50043 | Down | 1.15E-72 | 7.46E-72 |
| Marveld1     | 2772 | 1625    | 616.5  | 21.01696 | 7.434567 | -1.49923 | Down | #####    | #####    |
| Dock1        | 6785 | 5843.5  | 2214.5 | 30.79612 | 10.89811 | -1.49867 | Down | 0        | 0        |
| Xbp1         | 1851 | 2026.5  | 769    | 39.1374  | 13.86038 | -1.49758 | Down | #####    | #####    |
| RGD1561672   | 6050 | 131     | 50     | 0.775664 | 0.274734 | -1.4974  | Down | 1.01E-09 | 2.42E-09 |
| Dzip1        | 3778 | 3043.5  | 1155.5 | 28.83349 | 10.21313 | -1.49732 | Down | #####    | #####    |
| Dnajc10      | 4159 | 7923    | 2993   | 67.86256 | 24.04891 | -1.49664 | Down | 0        | 0        |
| Cdh13        | 3403 | 2066.5  | 785.5  | 21.77676 | 7.72095  | -1.49594 | Down | #####    | #####    |
| Cyb561d2     | 1500 | 225.5   | 85     | 5.366988 | 1.90392  | -1.49514 | Down | 6.40E-16 | 2.73E-15 |
| LOC100911825 | 1400 | 80      | 30.5   | 2.043118 | 0.725105 | -1.49451 | Down | 1.37E-06 | 2.90E-06 |
| Atf6b        | 2507 | 4072    | 1553.5 | 58.27928 | 20.6942  | -1.49376 | Down | #####    | #####    |
| Phf2         | 4931 | 2131    | 814.5  | 15.49853 | 5.511439 | -1.49163 | Down | #####    | #####    |
| Rsu1         | 1582 | 4151.5  | 1585   | 94.12727 | 33.48426 | -1.49113 | Down | #####    | #####    |
| Nelf         | 2848 | 1626.5  | 622    | 20.44848 | 7.279001 | -1.49018 | Down | #####    | #####    |

|              |      |        |        |          |          |          |      |          |          |
|--------------|------|--------|--------|----------|----------|----------|------|----------|----------|
| LOC684558    | 3945 | 4544.5 | 1741   | 41.33825 | 14.71687 | -1.49001 | Down | #####    | #####    |
| Sdc1         | 3021 | 13263  | 5066   | 157.3818 | 56.03793 | -1.48979 | Down | 0        | 0        |
| Plekhg2      | 5011 | 808    | 309.5  | 5.788644 | 2.061299 | -1.48967 | Down | 4.11E-52 | 2.38E-51 |
| Rpusd1       | 1747 | 483.5  | 185.5  | 9.946209 | 3.543276 | -1.48906 | Down | 9.44E-32 | 4.75E-31 |
| Ruvbl2       | 1504 | 3405   | 1304.5 | 81.12362 | 28.92137 | -1.48799 | Down | #####    | #####    |
| Tnfrsf11b    | 2832 | 160    | 61     | 2.017399 | 0.719455 | -1.48752 | Down | 1.37E-11 | 3.58E-11 |
| Pcsk6        | 4153 | 3584   | 1369.5 | 30.88612 | 11.0163  | -1.48732 | Down | #####    | #####    |
| Kpna2        | 1977 | 6562   | 2505.5 | 118.6622 | 42.32853 | -1.48716 | Down | 0        | 0        |
| Radil        | 3687 | 99.5   | 38     | 0.967927 | 0.345565 | -1.48594 | Down | 1.29E-07 | 2.86E-07 |
| Smarca4      | 5568 | 9491.5 | 3642   | 61.10933 | 21.82246 | -1.48558 | Down | 0        | 0        |
| Pdxk         | 939  | 266    | 102    | 10.13973 | 3.62189  | -1.4852  | Down | 3.72E-18 | 1.63E-17 |
| Uqcr1        | 1595 | 6273.5 | 2406   | 140.8862 | 50.34418 | -1.48463 | Down | 0        | 0        |
| Xkr5         | 2196 | 546.5  | 209    | 8.883528 | 3.176295 | -1.48379 | Down | 1.03E-35 | 5.38E-35 |
| Mlxip        | 2754 | 660    | 254    | 8.608401 | 3.077941 | -1.48378 | Down | 1.80E-42 | 9.85E-42 |
| Fbln1        | 2787 | 2326.5 | 892.5  | 29.90045 | 10.6912  | -1.48374 | Down | #####    | #####    |
| Pcif1        | 3977 | 1277   | 490.5  | 11.49275 | 4.109701 | -1.48362 | Down | 6.63E-81 | 4.45E-80 |
| Bicc1        | 3226 | 2617   | 1006   | 29.08927 | 10.40302 | -1.48349 | Down | #####    | #####    |
| Adamts9      | 7965 | 897    | 344    | 4.025866 | 1.44002  | -1.48321 | Down | 2.06E-57 | 1.23E-56 |
| LOC681468    | 252  | 60     | 23     | 8.544848 | 3.057924 | -1.4825  | Down | 4.08E-05 | 7.87E-05 |
| LOC100909635 | 588  | 340.5  | 130.5  | 20.6078  | 7.376919 | -1.4821  | Down | 7.02E-23 | 3.25E-22 |
| Fsd1         | 841  | 83     | 32     | 3.548566 | 1.270366 | -1.48199 | Down | 1.48E-06 | 3.13E-06 |
| Lgi4         | 2630 | 360    | 139    | 4.899611 | 1.754626 | -1.4815  | Down | 8.72E-24 | 4.08E-23 |
| Fbxo31       | 1775 | 980    | 376.5  | 19.77447 | 7.084555 | -1.48089 | Down | 1.62E-62 | 9.95E-62 |
| Mical3       | 6367 | 1466.5 | 565    | 8.253463 | 2.958465 | -1.48015 | Down | 5.69E-92 | 3.95E-91 |
| Galns        | 1575 | 408    | 158    | 9.290678 | 3.334422 | -1.47835 | Down | 1.25E-26 | 6.05E-26 |



|              |      |        |        |          |          |          |      |          |          |
|--------------|------|--------|--------|----------|----------|----------|------|----------|----------|
| Slc27a1      | 3210 | 866    | 334    | 9.662602 | 3.468004 | -1.47831 | Down | 5.26E-55 | 3.10E-54 |
| Car3         | 802  | 218.5  | 84     | 9.748566 | 3.499118 | -1.4782  | Down | 4.84E-15 | 2.03E-14 |
| LOC498276    | 1427 | 84.5   | 32.5   | 2.123932 | 0.762594 | -1.47775 | Down | 1.01E-06 | 2.15E-06 |
| siat7D       | 3237 | 4074   | 1571   | 45.11021 | 16.21099 | -1.47648 | Down | #####    | #####    |
| Gas2l3       | 2562 | 1235.5 | 475    | 17.23676 | 6.199819 | -1.47519 | Down | 5.11E-78 | 3.38E-77 |
| Trappc9      | 4122 | 1063.5 | 410.5  | 9.240699 | 3.325676 | -1.47435 | Down | 4.14E-67 | 2.60E-66 |
| Dnajc22      | 1371 | 232    | 89.5   | 6.043093 | 2.175251 | -1.47411 | Down | 5.14E-16 | 2.19E-15 |
| Blvrb        | 884  | 1237   | 480    | 50.18576 | 18.06953 | -1.47372 | Down | 4.58E-77 | 3.02E-76 |
| Acy1         | 1356 | 1701   | 659    | 44.98295 | 16.21232 | -1.47229 | Down | #####    | #####    |
| Amdhd2       | 1497 | 288    | 111    | 6.90177  | 2.4876   | -1.47221 | Down | 2.18E-19 | 9.70E-19 |
| Atxn7l3      | 3698 | 2881.5 | 1115   | 27.87216 | 10.05784 | -1.4705  | Down | #####    | #####    |
| Gipc1        | 1607 | 3704   | 1437   | 82.60295 | 29.83027 | -1.46942 | Down | #####    | #####    |
| lrf2bp1      | 2702 | 1032   | 401    | 13.69122 | 4.945563 | -1.46904 | Down | 1.87E-64 | 1.16E-63 |
| Map6         | 3581 | 2717.5 | 1055.5 | 27.22074 | 9.843153 | -1.46751 | Down | #####    | #####    |
| Dnajc9       | 1613 | 2745.5 | 1063.5 | 60.77947 | 21.97863 | -1.46748 | Down | #####    | #####    |
| Pam          | 3770 | 5960.5 | 2310   | 56.56745 | 20.46672 | -1.46669 | Down | 0        | 0        |
| Hdac7        | 4092 | 1827.5 | 710.5  | 16.00942 | 5.798211 | -1.46524 | Down | #####    | #####    |
| Gfra1        | 3616 | 507.5  | 197.5  | 5.021883 | 1.818928 | -1.46514 | Down | 1.57E-32 | 7.97E-32 |
| Tsc22d4      | 1665 | 1156   | 449.5  | 24.92606 | 9.034248 | -1.46418 | Down | 4.98E-72 | 3.21E-71 |
| Rps6ka2      | 5396 | 1381.5 | 537.5  | 9.159789 | 3.320267 | -1.46402 | Down | 1.54E-85 | 1.05E-84 |
| Herc3        | 5230 | 1074   | 417    | 7.328704 | 2.657017 | -1.46375 | Down | 4.37E-67 | 2.75E-66 |
| LOC100911422 | 1126 | 1623.5 | 630.5  | 51.56251 | 18.69603 | -1.46359 | Down | #####    | 1.25E-99 |
| Htatsf1      | 2911 | 2264   | 880    | 27.76996 | 10.07372 | -1.46293 | Down | #####    | #####    |
| Unc45a       | 3335 | 2634   | 1024.5 | 28.24476 | 10.24916 | -1.46248 | Down | #####    | #####    |
| Mlst8        | 3601 | 570    | 222.5  | 5.663309 | 2.055544 | -1.46212 | Down | 3.09E-36 | 1.61E-35 |

|              |      |         |        |          |          |          |      |          |          |
|--------------|------|---------|--------|----------|----------|----------|------|----------|----------|
| Psmb9        | 913  | 801     | 311.5  | 31.40932 | 11.41023 | -1.46086 | Down | 1.76E-50 | 1.01E-49 |
| Troap        | 2256 | 1126    | 441    | 17.91683 | 6.516438 | -1.45916 | Down | 2.74E-69 | 1.74E-68 |
| LOC682402    | 5307 | 6542.5  | 2556   | 44.15024 | 16.05933 | -1.45901 | Down | 0        | 0        |
| LOC100912455 | 3153 | 216     | 84.5   | 2.454646 | 0.893192 | -1.45847 | Down | 1.01E-14 | 4.22E-14 |
| Zbtb45       | 2197 | 459.5   | 180    | 7.51208  | 2.73374  | -1.45834 | Down | 3.45E-29 | 1.70E-28 |
| Atp5b        | 1759 | 31015   | 12108  | 630.7942 | 229.6473 | -1.45775 | Down | 0        | 0        |
| Rrp1b        | 4414 | 1584.5  | 619    | 12.8473  | 4.679573 | -1.45702 | Down | 4.54E-97 | 3.20E-96 |
| Gpr77        | 1312 | 358     | 139.5  | 9.756155 | 3.553666 | -1.457   | Down | 1.82E-23 | 8.48E-23 |
| Ablim1       | 6488 | 798.5   | 311    | 4.397467 | 1.602188 | -1.45663 | Down | 5.27E-50 | 3.01E-49 |
| Acad5b       | 1321 | 67      | 26.5   | 1.824011 | 0.664648 | -1.45645 | Down | 1.73E-05 | 3.42E-05 |
| Rab38        | 1402 | 232     | 91     | 5.903337 | 2.152924 | -1.45523 | Down | 1.66E-15 | 7.04E-15 |
| Lgals3bp     | 2151 | 7888.5  | 3089   | 131.6067 | 47.99998 | -1.45513 | Down | 0        | 0        |
| Nans         | 2039 | 5617    | 2196.5 | 98.60368 | 35.98935 | -1.45407 | Down | 0        | 0        |
| LOC100125385 | 1483 | 316     | 124    | 7.641762 | 2.789187 | -1.45406 | Down | 1.45E-20 | 6.57E-20 |
| Srgap2       | 3559 | 2531    | 993.5  | 25.4798  | 9.310493 | -1.45242 | Down | #####    | #####    |
| Fanca        | 4611 | 1184    | 464    | 9.189689 | 3.359679 | -1.45169 | Down | 1.08E-72 | 6.99E-72 |
| Dhx37        | 4177 | 1329    | 523    | 11.41127 | 4.173235 | -1.45122 | Down | 7.88E-81 | 5.28E-80 |
| Anapc5       | 2384 | 14565   | 5710   | 218.4589 | 79.90247 | -1.45105 | Down | 0        | 0        |
| Ednra        | 4595 | 595     | 233.5  | 4.6304   | 1.694139 | -1.45058 | Down | 1.95E-37 | 1.03E-36 |
| Pold1        | 3321 | 1445    | 567.5  | 15.58518 | 5.703181 | -1.45034 | Down | 3.91E-88 | 2.68E-87 |
| LOC100909992 | 822  | 239.5   | 94     | 10.39973 | 3.805912 | -1.45023 | Down | 7.27E-16 | 3.09E-15 |
| Parvb        | 1997 | 53      | 21     | 0.952265 | 0.348835 | -1.44882 | Down | 0.000176 | 0.000321 |
| Slk          | 3796 | 5736    | 2249.5 | 54.03119 | 19.8045  | -1.44796 | Down | 0        | 0        |
| Dysf         | 6319 | 117     | 46     | 0.662275 | 0.242759 | -1.44791 | Down | 1.76E-08 | 4.04E-08 |
| Ptgs1        | 2794 | 10322.5 | 4053.5 | 132.1713 | 48.4486  | -1.44788 | Down | 0        | 0        |

|            |      |        |        |          |          |          |      |          |          |
|------------|------|--------|--------|----------|----------|----------|------|----------|----------|
| R3hdm4     | 1803 | 1968.5 | 773    | 39.08771 | 14.3304  | -1.44764 | Down | #####    | #####    |
| Hnmpul1    | 3746 | 12676  | 4992   | 121.2784 | 44.47588 | -1.44723 | Down | 0        | 0        |
| Socs1      | 639  | 217    | 86     | 12.1993  | 4.476472 | -1.44636 | Down | 2.24E-14 | 9.16E-14 |
| RGD1565590 | 1299 | 343.5  | 134.5  | 9.428539 | 3.460721 | -1.44596 | Down | 2.44E-22 | 1.12E-21 |
| LOC688400  | 3307 | 378.5  | 148    | 4.079155 | 1.497444 | -1.44577 | Down | 2.23E-24 | 1.05E-23 |
| Akt2       | 1984 | 2733.5 | 1080   | 49.4695  | 18.16066 | -1.44572 | Down | #####    | #####    |
| Mfsd3      | 1531 | 239.5  | 94.5   | 5.60276  | 2.056959 | -1.44563 | Down | 7.27E-16 | 3.09E-15 |
| Rmnd5a     | 5671 | 3107.5 | 1217.5 | 19.54718 | 7.177058 | -1.4455  | Down | #####    | #####    |
| Hmx2       | 1497 | 234.5  | 93     | 5.614325 | 2.06391  | -1.44373 | Down | 2.53E-15 | 1.07E-14 |
| LOC679082  | 2551 | 301    | 118.5  | 4.22082  | 1.552484 | -1.44294 | Down | 1.09E-19 | 4.88E-19 |
| Tnfaip1    | 3885 | 4332   | 1712   | 39.91337 | 14.69517 | -1.44153 | Down | #####    | #####    |
| Tmem169    | 2942 | 133    | 52.5   | 1.615911 | 0.595023 | -1.44133 | Down | 1.57E-09 | 3.74E-09 |
| Clip1      | 4597 | 2492.5 | 983    | 19.38918 | 7.14358  | -1.44053 | Down | #####    | #####    |
| Glg1       | 5292 | 8648   | 3409   | 58.41307 | 21.52276 | -1.44043 | Down | 0        | 0        |
| Fbln2      | 4520 | 411.5  | 163    | 3.256875 | 1.20021  | -1.4402  | Down | 7.53E-26 | 3.61E-25 |
| Sec23a     | 2510 | 3405   | 1343.5 | 48.48091 | 17.86611 | -1.44019 | Down | #####    | #####    |
| Anxa11     | 2363 | 2473   | 980.5  | 37.48999 | 13.82091 | -1.43965 | Down | #####    | #####    |
| RGD1564019 | 3141 | 84     | 33     | 0.955128 | 0.352202 | -1.43929 | Down | 1.84E-06 | 3.86E-06 |
| Ppm1g      | 2182 | 5974   | 2362   | 97.94776 | 36.12078 | -1.43918 | Down | 0        | 0        |
| Lhpp       | 1687 | 480.5  | 190.5  | 10.20845 | 3.765049 | -1.43902 | Down | 5.20E-30 | 2.58E-29 |
| LOC686349  | 1188 | 273    | 107.5  | 8.213744 | 3.031341 | -1.43808 | Down | 5.28E-18 | 2.32E-17 |
| Ermp1      | 5095 | 3224.5 | 1274.5 | 22.58797 | 8.340577 | -1.43734 | Down | #####    | #####    |
| Polg       | 3651 | 2579.5 | 1023   | 25.29338 | 9.341333 | -1.43706 | Down | #####    | #####    |
| Dennd1a    | 4114 | 1765   | 701.5  | 15.39768 | 5.686946 | -1.43699 | Down | #####    | #####    |
| Zdhhc12    | 1145 | 525.5  | 209    | 16.44157 | 6.078465 | -1.43557 | Down | 2.23E-32 | 1.13E-31 |

|              |       |        |        |          |          |          |      |          |          |
|--------------|-------|--------|--------|----------|----------|----------|------|----------|----------|
| LOC304396    | 2564  | 1015   | 402.5  | 14.18146 | 5.247247 | -1.43437 | Down | 1.60E-61 | 9.77E-61 |
| Lima1        | 4204  | 5076.5 | 2018.5 | 43.27074 | 16.03381 | -1.43227 | Down | #####    | #####    |
| RGD1306730   | 2504  | 1945.5 | 773    | 27.79848 | 10.30168 | -1.43213 | Down | #####    | #####    |
| Tex261       | 1111  | 3201.5 | 1272.5 | 103.0945 | 38.22022 | -1.43156 | Down | #####    | #####    |
| Qser1        | 5635  | 3340.5 | 1325   | 21.17658 | 7.851451 | -1.43144 | Down | #####    | #####    |
| Cntnap1      | 5379  | 91.5   | 36     | 0.607148 | 0.225121 | -1.43135 | Down | 7.88E-07 | 1.69E-06 |
| Galnt12      | 2277  | 103    | 41     | 1.618905 | 0.600773 | -1.43013 | Down | 1.70E-07 | 3.74E-07 |
| Cd99         | 686   | 2099.5 | 834.5  | 109.412  | 40.61479 | -1.42969 | Down | #####    | #####    |
| Plxna2       | 10201 | 1469.5 | 586.5  | 5.15274  | 1.913863 | -1.42885 | Down | 3.34E-87 | 2.29E-86 |
| Spryd3       | 2414  | 1863.5 | 742.5  | 27.6512  | 10.27045 | -1.42884 | Down | #####    | #####    |
| Actr1a       | 2767  | 7648.5 | 3048.5 | 98.83884 | 36.74649 | -1.42747 | Down | 0        | 0        |
| LOC684111    | 1329  | 117    | 46.5   | 3.154532 | 1.173241 | -1.42693 | Down | 1.76E-08 | 4.04E-08 |
| Mxra7        | 647   | 128.5  | 51.5   | 7.1082   | 2.644313 | -1.42659 | Down | 5.53E-09 | 1.30E-08 |
| Prtfdc1      | 1099  | 1092   | 436.5  | 35.53288 | 13.22001 | -1.42643 | Down | 3.40E-65 | 2.11E-64 |
| Isoc1        | 3315  | 1600   | 638    | 17.23046 | 6.411458 | -1.42624 | Down | 7.10E-95 | 4.96E-94 |
| LOC100909582 | 1561  | 77     | 31     | 1.773909 | 0.660148 | -1.42607 | Down | 7.73E-06 | 1.56E-05 |
| Rnd2         | 1387  | 168    | 67     | 4.338369 | 1.61472  | -1.42587 | Down | 2.39E-11 | 6.12E-11 |
| Actn2        | 2943  | 151.5  | 60.5   | 1.842734 | 0.685882 | -1.42581 | Down | 2.15E-10 | 5.28E-10 |
| Afg3l1       | 2504  | 1969   | 784    | 28.1335  | 10.47459 | -1.4254  | Down | #####    | #####    |
| Fam114a1     | 3224  | 3854.5 | 1537.5 | 42.74977 | 15.91842 | -1.42522 | Down | #####    | #####    |
| LOC688280    | 2828  | 1343   | 534.5  | 17.00034 | 6.331048 | -1.42505 | Down | 2.63E-80 | 1.76E-79 |
| Fto          | 1571  | 1368.5 | 548    | 31.24656 | 11.64148 | -1.42442 | Down | 8.93E-81 | 5.99E-80 |
| Plekhg3      | 4379  | 1306.5 | 522    | 10.70305 | 3.987901 | -1.42432 | Down | 1.76E-77 | 1.16E-76 |
| Tnfrsf19     | 1385  | 147    | 58     | 3.80083  | 1.416344 | -1.42414 | Down | 2.94E-10 | 7.18E-10 |
| Cant1        | 2701  | 1279.5 | 511    | 16.97764 | 6.32842  | -1.42372 | Down | 5.74E-76 | 3.76E-75 |

|              |      |         |        |          |          |          |      |          |          |
|--------------|------|---------|--------|----------|----------|----------|------|----------|----------|
| Uba7         | 3063 | 94.5    | 38     | 1.104643 | 0.411851 | -1.42339 | Down | 8.25E-07 | 1.76E-06 |
| Paqr8        | 1630 | 424.5   | 169.5  | 9.340995 | 3.483138 | -1.42319 | Down | 2.08E-26 | 1.00E-25 |
| Mta1         | 2741 | 5745    | 2302   | 75.139   | 28.02085 | -1.42306 | Down | 0        | 0        |
| Wee1         | 3305 | 1214.5  | 484    | 13.10402 | 4.890141 | -1.42206 | Down | 1.89E-72 | 1.22E-71 |
| LOC100362124 | 4903 | 944.5   | 378    | 6.899672 | 2.57508  | -1.42191 | Down | 2.47E-56 | 1.47E-55 |
| Mex3d        | 2734 | 2142.5  | 860    | 28.13456 | 10.50536 | -1.42122 | Down | #####    | #####    |
| Rbpms2       | 1903 | 68      | 27     | 1.277439 | 0.477007 | -1.42117 | Down | 2.15E-05 | 4.23E-05 |
| Stac2        | 2880 | 733.5   | 294.5  | 9.137137 | 3.412315 | -1.42099 | Down | 5.21E-44 | 2.87E-43 |
| Crabp1       | 755  | 301     | 121    | 14.27957 | 5.332853 | -1.42097 | Down | 6.02E-19 | 2.67E-18 |
| Pdcd4        | 1410 | 473     | 188.5  | 11.97012 | 4.471393 | -1.42064 | Down | 2.09E-29 | 1.03E-28 |
| LOC100911896 | 927  | 162.5   | 65     | 6.25567  | 2.338126 | -1.41981 | Down | 6.78E-11 | 1.70E-10 |
| Fkrp         | 2860 | 1006.5  | 404    | 12.6143  | 4.71555  | -1.41956 | Down | 1.24E-59 | 7.52E-59 |
| Phf15        | 2712 | 2209.5  | 887    | 29.19438 | 10.91766 | -1.41903 | Down | #####    | #####    |
| Scarb1       | 2497 | 3073.5  | 1234.5 | 44.12181 | 16.50784 | -1.41834 | Down | #####    | #####    |
| Fbxl19       | 2421 | 1223.5  | 492.5  | 18.12936 | 6.784202 | -1.41808 | Down | 6.68E-72 | 4.30E-71 |
| Akap2        | 3467 | 3167.5  | 1273   | 32.74954 | 12.26533 | -1.41689 | Down | #####    | #####    |
| Iqce         | 2487 | 577.5   | 231.5  | 8.321239 | 3.117369 | -1.41647 | Down | 4.18E-35 | 2.17E-34 |
| RGD1560813   | 694  | 500.5   | 201    | 25.80166 | 9.668371 | -1.41612 | Down | 1.94E-30 | 9.69E-30 |
| Fam38a       | 8221 | 11130   | 4479.5 | 48.52144 | 18.18666 | -1.41574 | Down | 0        | 0        |
| Sec31a       | 4422 | 10424.5 | 4199   | 84.51792 | 31.6956  | -1.41497 | Down | 0        | 0        |
| Nrbp         | 2152 | 1993    | 801.5  | 33.17004 | 12.44288 | -1.41456 | Down | #####    | #####    |
| Lmbr1l       | 1055 | 104     | 42     | 3.52636  | 1.323171 | -1.41418 | Down | 2.08E-07 | 4.59E-07 |
| Ube3c        | 5056 | 6484    | 2602.5 | 45.79707 | 17.18847 | -1.41381 | Down | 0        | 0        |
| Trabd        | 2397 | 1299    | 523    | 19.42182 | 7.293285 | -1.41304 | Down | 3.74E-76 | 2.45E-75 |
| Pomgnt1      | 2745 | 3326    | 1340.5 | 43.39316 | 16.29518 | -1.41302 | Down | #####    | #####    |

|              |       |         |        |          |          |          |      |          |          |
|--------------|-------|---------|--------|----------|----------|----------|------|----------|----------|
| LOC100911693 | 1761  | 1756    | 707    | 35.70866 | 13.41373 | -1.41256 | Down | #####    | #####    |
| Ndrp2        | 2042  | 877.5   | 353    | 15.40801 | 5.788318 | -1.41246 | Down | 5.14E-52 | 2.97E-51 |
| C1qtnf5      | 1364  | 918.5   | 370    | 24.13696 | 9.068417 | -1.41232 | Down | 3.02E-54 | 1.77E-53 |
| Fhod3        | 5330  | 448.5   | 181    | 3.012481 | 1.132254 | -1.41175 | Down | 3.20E-27 | 1.55E-26 |
| Kcnmb3       | 1637  | 43      | 17.5   | 0.945893 | 0.35554  | -1.41167 | Down | 0.00073  | 0.001254 |
| Lpcat1       | 3621  | 1535.5  | 617.5  | 15.15336 | 5.697654 | -1.4112  | Down | 6.70E-90 | 4.62E-89 |
| Utrn         | 10705 | 5693    | 2291   | 19.00826 | 7.147874 | -1.41104 | Down | 0        | 0        |
| Tagln2       | 1325  | 19976.5 | 8071.5 | 540.3887 | 203.3168 | -1.41027 | Down | 0        | 0        |
| LOC100910195 | 3927  | 611.5   | 247    | 5.569642 | 2.095605 | -1.41022 | Down | 1.70E-36 | 8.89E-36 |
| Tgfb1i1      | 1972  | 1260.5  | 511.5  | 22.96056 | 8.640975 | -1.40989 | Down | 4.94E-73 | 3.20E-72 |
| Shmt2        | 2075  | 3682.5  | 1488   | 63.56595 | 23.93112 | -1.40937 | Down | #####    | #####    |
| LOC690137    | 1807  | 161.5   | 65     | 3.193195 | 1.202459 | -1.40901 | Down | 9.74E-11 | 2.42E-10 |
| Alms1        | 9965  | 1289.5  | 519.5  | 4.622485 | 1.741485 | -1.40835 | Down | 1.42E-75 | 9.27E-75 |
| Chd3         | 7343  | 7242.5  | 2925.5 | 35.31024 | 13.30527 | -1.40809 | Down | 0        | 0        |
| LOC100911770 | 574   | 57      | 23     | 3.554386 | 1.339367 | -1.40805 | Down | 0.000127 | 0.000232 |
| Atp8a1       | 5335  | 712     | 287.5  | 4.773849 | 1.799449 | -1.4076  | Down | 1.88E-42 | 1.03E-41 |
| RGD1565149   | 2697  | 419     | 170    | 5.562819 | 2.097463 | -1.40717 | Down | 2.17E-25 | 1.03E-24 |
| RGD1562618   | 1548  | 2702.5  | 1093   | 62.49615 | 23.56943 | -1.40685 | Down | #####    | #####    |
| Tmem184b     | 3324  | 3175.5  | 1288   | 34.2663  | 12.92443 | -1.40669 | Down | #####    | #####    |
| Msh2         | 3002  | 2211.5  | 894    | 26.32023 | 9.935146 | -1.40556 | Down | #####    | #####    |
| Tmem161a     | 2159  | 564     | 229    | 9.367116 | 3.53584  | -1.40555 | Down | 1.41E-33 | 7.24E-33 |
| Kat2a        | 3059  | 2152    | 871    | 25.2113  | 9.516938 | -1.4055  | Down | #####    | #####    |
| Phgdh        | 1803  | 3325    | 1347.5 | 66.08756 | 24.94841 | -1.40543 | Down | #####    | #####    |
| Slc29a3      | 1831  | 684     | 277    | 13.40218 | 5.061686 | -1.40478 | Down | 1.54E-40 | 8.28E-40 |
| RGD1309821   | 2332  | 270     | 110    | 4.151851 | 1.568674 | -1.40421 | Down | 8.50E-17 | 3.67E-16 |

|              |      |         |         |          |          |          |      |          |          |
|--------------|------|---------|---------|----------|----------|----------|------|----------|----------|
| C1r          | 2797 | 5752    | 2333.5  | 73.70694 | 27.85015 | -1.40412 | Down | 0        | 0        |
| Gcs1         | 2702 | 759.5   | 307.5   | 10.05134 | 3.798407 | -1.40392 | Down | 6.89E-45 | 3.81E-44 |
| Trpv2        | 2811 | 59.5    | 24      | 0.755888 | 0.285693 | -1.40371 | Down | 0.000107 | 0.000199 |
| 9-Sep        | 2866 | 12588.5 | 5110    | 157.5174 | 59.53877 | -1.40361 | Down | 0        | 0        |
| Unc93b1      | 2270 | 543     | 220     | 8.563896 | 3.237312 | -1.40347 | Down | 1.68E-32 | 8.52E-32 |
| Ctbp1        | 2430 | 6484.5  | 2631    | 95.5327  | 36.14288 | -1.40228 | Down | 0        | 0        |
| Il33         | 2471 | 36279   | 14688   | 524.5777 | 198.5583 | -1.40159 | Down | 0        | 0        |
| Ghrhr        | 1629 | 71      | 29      | 1.565597 | 0.592706 | -1.40133 | Down | 2.24E-05 | 4.40E-05 |
| RGD1306926   | 3691 | 430     | 174.5   | 4.173704 | 1.580506 | -1.40094 | Down | 3.99E-26 | 1.92E-25 |
| Fn1          | 8331 | 206812  | 84012.5 | 889.1291 | 336.7281 | -1.40081 | Down | 0        | 0        |
| Slc36a4      | 2973 | 322     | 130.5   | 3.870214 | 1.46597  | -1.40056 | Down | 5.01E-20 | 2.25E-19 |
| Mfge8        | 2020 | 64414   | 26194   | 1142.544 | 432.9208 | -1.40007 | Down | 0        | 0        |
| Myo18a       | 6951 | 5673    | 2308.5  | 29.23116 | 11.08209 | -1.39928 | Down | 0        | 0        |
| Ccni         | 2671 | 8999.5  | 3648.5  | 120.1865 | 45.56572 | -1.39925 | Down | 0        | 0        |
| Mmgt2        | 2093 | 317     | 128.5   | 5.402917 | 2.049573 | -1.39842 | Down | 9.80E-20 | 4.39E-19 |
| Pccb         | 1833 | 1847.5  | 754     | 36.1309  | 13.71198 | -1.3978  | Down | #####    | #####    |
| Lrrc20       | 3034 | 463.5   | 189     | 5.464382 | 2.074755 | -1.39712 | Down | 1.30E-27 | 6.31E-27 |
| LOC100909794 | 702  | 154     | 62      | 7.809857 | 2.96536  | -1.39709 | Down | 2.25E-10 | 5.53E-10 |
| Arhgef25     | 2118 | 648     | 263     | 10.95218 | 4.158514 | -1.39708 | Down | 2.35E-38 | 1.25E-37 |
| Ier5l        | 1612 | 2352.5  | 964     | 52.41777 | 19.91221 | -1.3964  | Down | #####    | #####    |
| Pigy         | 1135 | 155     | 63.5    | 4.896296 | 1.860363 | -1.39611 | Down | 2.75E-10 | 6.72E-10 |
| LOC686774    | 5587 | 3309    | 1346    | 21.16626 | 8.042948 | -1.39597 | Down | #####    | #####    |
| Ccnd3        | 1843 | 4124.5  | 1684.5  | 80.16724 | 30.4718  | -1.39554 | Down | #####    | #####    |
| Cdca3        | 1524 | 3742    | 1527.5  | 87.99277 | 33.45138 | -1.39532 | Down | #####    | #####    |
| Med12        | 6792 | 2438    | 994.5   | 12.85518 | 4.888374 | -1.39492 | Down | #####    | #####    |

|              |      |        |        |          |          |          |      |          |          |
|--------------|------|--------|--------|----------|----------|----------|------|----------|----------|
| Esd          | 1072 | 2381   | 969.5  | 79.18276 | 30.11349 | -1.39478 | Down | #####    | #####    |
| Ccnf         | 3313 | 2250   | 917.5  | 24.32131 | 9.254407 | -1.39401 | Down | #####    | #####    |
| Pabpc4       | 2611 | 11853  | 4836   | 162.4902 | 61.82923 | -1.39399 | Down | 0        | 0        |
| S1pr2        | 2754 | 1046   | 426    | 13.5788  | 5.167023 | -1.39395 | Down | 1.66E-60 | 1.01E-59 |
| Tapbpl       | 1886 | 1353.5 | 552    | 25.71062 | 9.78368  | -1.39392 | Down | 1.66E-77 | 1.10E-76 |
| LOC100909406 | 831  | 345.5  | 142.5  | 14.95916 | 5.693225 | -1.39371 | Down | 1.07E-20 | 4.83E-20 |
| Plp2         | 1098 | 5744.5 | 2345   | 187.3457 | 71.32721 | -1.39318 | Down | 0        | 0        |
| Anpep        | 3320 | 33     | 13.5   | 0.355504 | 0.135353 | -1.39314 | Down | 0.003088 | 0.005043 |
| Acly         | 4331 | 11812  | 4822   | 97.66906 | 37.18617 | -1.39314 | Down | 0        | 0        |
| Adam9        | 3095 | 3125   | 1277.5 | 36.15065 | 13.78969 | -1.39043 | Down | #####    | #####    |
| Ppp1r14b     | 745  | 4878.5 | 1995   | 234.192  | 89.382   | -1.38964 | Down | #####    | #####    |
| Ado          | 1169 | 463.5  | 190.5  | 14.24592 | 5.437243 | -1.3896  | Down | 2.24E-27 | 1.09E-26 |
| Dusp15       | 3164 | 44     | 18     | 0.497618 | 0.189938 | -1.38951 | Down | 0.000898 | 0.001532 |
| Adarb1       | 6382 | 1254   | 514.5  | 7.042284 | 2.688102 | -1.38946 | Down | 2.11E-71 | 1.36E-70 |
| Naa10        | 938  | 578.5  | 237    | 22.04167 | 8.415537 | -1.38911 | Down | 8.10E-34 | 4.16E-33 |
| Mcm6         | 2929 | 6852   | 2801.5 | 83.69869 | 31.9619  | -1.38885 | Down | 0        | 0        |
| Sqle         | 2085 | 7685   | 3137.5 | 131.5226 | 50.23366 | -1.38858 | Down | 0        | 0        |
| Acap3        | 4440 | 1443.5 | 592    | 11.65754 | 4.452588 | -1.38855 | Down | 9.20E-82 | 6.19E-81 |
| Bicd2        | 4586 | 6068.5 | 2483   | 47.33856 | 18.08959 | -1.38786 | Down | 0        | 0        |
| Ltbp3        | 4389 | 9654   | 3963.5 | 78.91605 | 30.15693 | -1.38783 | Down | 0        | 0        |
| Rabif        | 1804 | 268    | 109.5  | 5.315913 | 2.032265 | -1.38723 | Down | 9.97E-17 | 4.30E-16 |
| Acsbg1       | 2689 | 213    | 87.5   | 2.832528 | 1.082892 | -1.3872  | Down | 1.66E-13 | 6.12E-13 |
| B4galt7      | 1591 | 605.5  | 248    | 13.62283 | 5.209321 | -1.38686 | Down | 2.45E-35 | 1.27E-34 |
| Josd1        | 2724 | 1244.5 | 509.5  | 16.34674 | 6.25115  | -1.38681 | Down | 4.64E-71 | 2.97E-70 |
| Xpo5         | 4927 | 3512.5 | 1437.5 | 25.49312 | 9.750516 | -1.38656 | Down | #####    | #####    |



|              |      |        |        |          |          |          |      |          |          |
|--------------|------|--------|--------|----------|----------|----------|------|----------|----------|
| Pygb         | 3873 | 3658   | 1500   | 33.80955 | 12.93153 | -1.38654 | Down | #####    | #####    |
| Kif26a       | 5779 | 134    | 55.5   | 0.833392 | 0.318847 | -1.38613 | Down | 6.00E-09 | 1.40E-08 |
| Cep250       | 7614 | 1902   | 781    | 8.947043 | 3.424626 | -1.38546 | Down | #####    | #####    |
| Arl4c-ps1    | 3440 | 12679  | 5199   | 131.8451 | 50.46684 | -1.38544 | Down | 0        | 0        |
| Plekhb1      | 1903 | 433.5  | 178.5  | 8.168985 | 3.130476 | -1.38377 | Down | 1.24E-25 | 5.93E-25 |
| Tbc1d1       | 5313 | 7709.5 | 3168.5 | 51.89584 | 19.89514 | -1.3832  | Down | 0        | 0        |
| LOC685152    | 5490 | 6978   | 2870   | 45.50745 | 17.45227 | -1.38269 | Down | 0        | 0        |
| Cabin1       | 7260 | 2683.5 | 1106   | 13.26002 | 5.08682  | -1.38225 | Down | #####    | #####    |
| Tgfb3        | 2619 | 5090.5 | 2093.5 | 69.64413 | 26.71785 | -1.3822  | Down | #####    | #####    |
| Lrrk2        | 7581 | 1338   | 548.5  | 6.307654 | 2.420646 | -1.38171 | Down | 3.65E-76 | 2.39E-75 |
| Msn          | 2099 | 21470  | 8819.5 | 365.6582 | 140.4385 | -1.38056 | Down | 0        | 0        |
| Hibch        | 1738 | 215    | 88.5   | 4.420311 | 1.697746 | -1.38053 | Down | 1.41E-13 | 5.30E-13 |
| Sfxn1        | 2178 | 2104.5 | 865    | 34.51841 | 13.26588 | -1.37965 | Down | #####    | #####    |
| PCOLCE2      | 1871 | 8234.5 | 3393.5 | 157.5659 | 60.59022 | -1.3788  | Down | 0        | 0        |
| Padl2        | 4507 | 103.5  | 42     | 0.819255 | 0.31512  | -1.37841 | Down | 2.99E-07 | 6.53E-07 |
| Tbc1d25      | 2378 | 331    | 137    | 4.996435 | 1.922327 | -1.37805 | Down | 9.66E-20 | 4.32E-19 |
| Tap2         | 2446 | 1044   | 430    | 15.27251 | 5.879244 | -1.37723 | Down | 2.95E-59 | 1.78E-58 |
| Podnl1       | 2119 | 63     | 26     | 1.064142 | 0.409654 | -1.37721 | Down | 7.66E-05 | 0.000144 |
| RGD1308023   | 6002 | 1281   | 528    | 7.634404 | 2.93901  | -1.37719 | Down | 3.28E-72 | 2.12E-71 |
| LOC691153    | 1521 | 308    | 128    | 7.275453 | 2.801388 | -1.3769  | Down | 2.36E-18 | 1.04E-17 |
| RGD1563349   | 5912 | 170    | 70.5   | 1.028562 | 0.396079 | -1.37677 | Down | 6.24E-11 | 1.56E-10 |
| LOC100909750 | 478  | 2513.5 | 1040   | 188.4499 | 72.59934 | -1.37615 | Down | #####    | #####    |
| Agap3        | 4337 | 2000.5 | 828    | 16.54338 | 6.374678 | -1.37583 | Down | #####    | #####    |
| LOC100910979 | 2575 | 51     | 21     | 0.707158 | 0.27263  | -1.37509 | Down | 0.000371 | 0.000662 |
| LOC100359616 | 318  | 1074   | 449    | 121.7256 | 46.93672 | -1.37484 | Down | 2.30E-59 | 1.39E-58 |

|              |      |         |        |          |          |          |      |          |          |
|--------------|------|---------|--------|----------|----------|----------|------|----------|----------|
| Ccdc85c      | 763  | 243.5   | 101    | 11.49146 | 4.434821 | -1.37361 | Down | 8.61E-15 | 3.59E-14 |
| Klhl23       | 3697 | 561     | 232    | 5.419522 | 2.092221 | -1.37313 | Down | 2.08E-32 | 1.05E-31 |
| Suox         | 2184 | 306     | 126.5  | 5.012272 | 1.936072 | -1.37233 | Down | 1.61E-18 | 7.11E-18 |
| Zfp64        | 2419 | 814     | 338    | 12.07221 | 4.665416 | -1.37161 | Down | 6.00E-46 | 3.35E-45 |
| Syt11        | 1812 | 1634    | 679    | 32.31747 | 12.49445 | -1.37103 | Down | 2.55E-90 | 1.76E-89 |
| LOC100364403 | 698  | 272.5   | 113    | 13.95872 | 5.397292 | -1.37086 | Down | 2.16E-16 | 9.24E-16 |
| Gnb1         | 1544 | 11198   | 4638   | 259.2322 | 100.2669 | -1.3704  | Down | 0        | 0        |
| Otx1         | 1229 | 71      | 29.5   | 2.079815 | 0.804688 | -1.36995 | Down | 2.24E-05 | 4.40E-05 |
| Parp9        | 3179 | 700     | 290    | 7.869549 | 3.045101 | -1.36979 | Down | 6.62E-40 | 3.55E-39 |
| Shisa5       | 1479 | 3440.5  | 1431.5 | 83.43035 | 32.28686 | -1.36963 | Down | #####    | #####    |
| Stim1        | 3839 | 2197.5  | 914    | 20.49203 | 7.937808 | -1.36825 | Down | #####    | #####    |
| Atm          | 9756 | 1187.5  | 492.5  | 4.338048 | 1.682334 | -1.36658 | Down | 2.10E-66 | 1.31E-65 |
| Emp2         | 3154 | 535.5   | 222.5  | 6.072617 | 2.355427 | -1.36633 | Down | 8.32E-31 | 4.16E-30 |
| Dnase2a      | 1433 | 1039.5  | 432    | 25.98381 | 10.08193 | -1.36584 | Down | 4.92E-58 | 2.96E-57 |
| Prps2        | 2697 | 1228.5  | 510    | 16.23601 | 6.301065 | -1.36553 | Down | 2.11E-68 | 1.34E-67 |
| LOC100912571 | 2076 | 2221.5  | 923    | 38.26478 | 14.85175 | -1.36538 | Down | #####    | #####    |
| Ckb          | 1463 | 7381    | 3083   | 181.1086 | 70.29558 | -1.36535 | Down | 0        | 0        |
| Npepl1       | 1882 | 964     | 403    | 18.37524 | 7.133945 | -1.36499 | Down | 1.81E-53 | 1.06E-52 |
| Sid2         | 4741 | 2103    | 878    | 15.89222 | 6.171993 | -1.36451 | Down | #####    | #####    |
| Ube2e2       | 914  | 939.5   | 391.5  | 36.8283  | 14.30819 | -1.36397 | Down | 1.75E-52 | 1.01E-51 |
| Exosc5       | 1051 | 641.5   | 267.5  | 21.89207 | 8.50573  | -1.3639  | Down | 2.39E-36 | 1.25E-35 |
| Kcnd1        | 3712 | 446.5   | 186    | 4.30691  | 1.673423 | -1.36385 | Down | 9.85E-26 | 4.71E-25 |
| Fbn1         | 8942 | 16901.5 | 7025   | 67.47245 | 26.22658 | -1.36327 | Down | 0        | 0        |
| Aldh1a3      | 1539 | 1858    | 774    | 43.1947  | 16.7922  | -1.36306 | Down | #####    | #####    |
| Nono         | 2438 | 13598   | 5662.5 | 199.4691 | 77.56398 | -1.36271 | Down | 0        | 0        |

|              |      |        |        |          |          |          |      |          |          |
|--------------|------|--------|--------|----------|----------|----------|------|----------|----------|
| Ndufa11      | 538  | 1834.5 | 766    | 122.1482 | 47.50576 | -1.36246 | Down | #####    | 2.14E-99 |
| Ndp          | 1925 | 178.5  | 74.5   | 3.318231 | 1.290944 | -1.36199 | Down | 3.26E-11 | 8.25E-11 |
| Hdgfrp2      | 2157 | 3262   | 1358.5 | 54.12563 | 21.06469 | -1.36149 | Down | #####    | #####    |
| Tm7sf2       | 1510 | 446.5  | 186.5  | 10.58644 | 4.122709 | -1.36055 | Down | 9.85E-26 | 4.71E-25 |
| Comtd1       | 2308 | 251.5  | 105    | 3.90584  | 1.521237 | -1.36039 | Down | 4.50E-15 | 1.89E-14 |
| RGD1304827   | 1743 | 490    | 206    | 10.09573 | 3.933495 | -1.35986 | Down | 9.83E-28 | 4.79E-27 |
| Dact3        | 2803 | 258    | 108.5  | 3.299778 | 1.286093 | -1.35937 | Down | 1.95E-15 | 8.26E-15 |
| Sntb1        | 2502 | 331    | 138.5  | 4.738268 | 1.846892 | -1.35926 | Down | 1.65E-19 | 7.37E-19 |
| LOC100911730 | 2148 | 5583.5 | 2331.5 | 92.92518 | 36.23291 | -1.35877 | Down | #####    | #####    |
| LOC500046    | 4838 | 1232   | 513    | 9.098594 | 3.548375 | -1.35849 | Down | 2.62E-68 | 1.66E-67 |
| Mfhas1       | 3177 | 1015   | 425.5  | 11.46249 | 4.471117 | -1.35821 | Down | 4.78E-56 | 2.83E-55 |
| Foxk1        | 2487 | 505    | 212    | 7.301274 | 2.848896 | -1.35775 | Down | 1.33E-28 | 6.50E-28 |
| Slc9a3r2     | 2110 | 861.5  | 361.5  | 14.64418 | 5.718996 | -1.35649 | Down | 1.07E-47 | 6.02E-47 |
| Snn          | 2931 | 2110   | 881.5  | 25.76374 | 10.06152 | -1.35649 | Down | #####    | #####    |
| Psat1        | 2079 | 3391   | 1417.5 | 58.31265 | 22.77391 | -1.35643 | Down | #####    | #####    |
| Frm4a        | 3538 | 3807   | 1600   | 38.59595 | 15.07419 | -1.35637 | Down | #####    | #####    |
| LOC498972    | 1647 | 1489.5 | 625    | 32.44716 | 12.67447 | -1.35617 | Down | 4.96E-81 | 3.33E-80 |
| Bend6        | 1768 | 594    | 248.5  | 12.01928 | 4.69546  | -1.35601 | Down | 1.14E-33 | 5.83E-33 |
| Abr          | 4924 | 3182.5 | 1335.5 | 23.1437  | 9.041823 | -1.35593 | Down | #####    | #####    |
| Rbbp8        | 3135 | 2185   | 914.5  | 24.89721 | 9.728672 | -1.35567 | Down | #####    | #####    |
| Arrb2        | 1758 | 414.5  | 174.5  | 8.444611 | 3.302473 | -1.35448 | Down | 1.09E-23 | 5.08E-23 |
| Raph1        | 7305 | 4346.5 | 1823   | 21.28122 | 8.325812 | -1.35392 | Down | #####    | #####    |
| Dock11       | 6660 | 71     | 30     | 0.381387 | 0.14931  | -1.35294 | Down | 3.89E-05 | 7.51E-05 |
| H2afy2       | 1983 | 71.5   | 30     | 1.292097 | 0.506457 | -1.3512  | Down | 3.89E-05 | 7.52E-05 |
| Tnnt2        | 1096 | 253.5  | 106.5  | 8.298741 | 3.25287  | -1.35118 | Down | 3.83E-15 | 1.61E-14 |

|              |      |         |        |          |          |          |      |          |          |
|--------------|------|---------|--------|----------|----------|----------|------|----------|----------|
| LOC100362940 | 2483 | 455.5   | 191    | 6.571155 | 2.576191 | -1.35091 | Down | 6.22E-26 | 2.98E-25 |
| Alad         | 1278 | 410     | 172    | 11.48334 | 4.503233 | -1.35051 | Down | 1.50E-23 | 7.01E-23 |
| Gorasp2      | 2177 | 5569    | 2347.5 | 91.73807 | 35.99687 | -1.34965 | Down | #####    | #####    |
| Itgb5        | 3696 | 22918.5 | 9642   | 221.8428 | 87.08524 | -1.34904 | Down | 0        | 0        |
| Cdkn2c       | 1462 | 1084.5  | 457.5  | 26.48939 | 10.40425 | -1.34824 | Down | 5.01E-59 | 3.02E-58 |
| Gpr180       | 1835 | 933     | 393.5  | 18.22512 | 7.162213 | -1.34745 | Down | 3.98E-51 | 2.29E-50 |
| Get4         | 2091 | 3491.5  | 1474   | 59.79891 | 23.50122 | -1.34738 | Down | #####    | #####    |
| Kctd15       | 2418 | 1369    | 577.5  | 20.29285 | 7.979295 | -1.34664 | Down | 4.16E-74 | 2.71E-73 |
| Myrip        | 2571 | 190     | 80     | 2.651115 | 1.043075 | -1.34576 | Down | 1.22E-11 | 3.19E-11 |
| LOC100912770 | 833  | 363     | 153.5  | 15.56863 | 6.12584  | -1.34566 | Down | 7.29E-21 | 3.31E-20 |
| Lppr5        | 2808 | 547.5   | 231.5  | 6.99463  | 2.752349 | -1.34558 | Down | 1.55E-30 | 7.75E-30 |
| RGD1306151   | 4168 | 990.5   | 418    | 8.493282 | 3.343111 | -1.34513 | Down | 6.43E-54 | 3.76E-53 |
| Uso1         | 3842 | 6789.5  | 2861   | 63.1929  | 24.88375 | -1.34456 | Down | 0        | 0        |
| Dennd4b      | 5111 | 1208.5  | 511    | 8.469893 | 3.335915 | -1.34426 | Down | 3.49E-65 | 2.17E-64 |
| Bcs1l        | 1685 | 433.5   | 183    | 9.179919 | 3.617974 | -1.3433  | Down | 1.79E-24 | 8.44E-24 |
| LOC100911483 | 564  | 1813.5  | 768    | 115.1331 | 45.37832 | -1.34323 | Down | 1.15E-96 | 8.07E-96 |
| Aagab        | 1087 | 739.5   | 312.5  | 24.37201 | 9.612814 | -1.34219 | Down | 1.09E-40 | 5.87E-40 |
| Exosc4       | 1106 | 456.5   | 192    | 14.73137 | 5.814619 | -1.34114 | Down | 7.47E-26 | 3.58E-25 |
| LOC100912484 | 1296 | 271.5   | 115    | 7.484088 | 2.954925 | -1.3407  | Down | 8.81E-16 | 3.74E-15 |
| Rpl3         | 1317 | 24820   | 10461  | 671.6668 | 265.2103 | -1.34061 | Down | 0        | 0        |
| Mfsd6        | 4840 | 1121    | 474    | 8.283664 | 3.271002 | -1.34054 | Down | 1.16E-60 | 7.04E-60 |
| LOC100912427 | 1122 | 4014.5  | 1710.5 | 128.4155 | 50.73528 | -1.33976 | Down | #####    | #####    |
| LOC100911918 | 781  | 403.5   | 171    | 18.51257 | 7.314654 | -1.33964 | Down | 9.88E-23 | 4.57E-22 |
| Sec61a1      | 3061 | 11472   | 4850   | 133.934  | 52.92736 | -1.33944 | Down | 0        | 0        |
| Gtf2i        | 3988 | 8737    | 3701.5 | 78.37228 | 30.98546 | -1.33875 | Down | 0        | 0        |

|              |      |        |        |          |          |          |      |          |          |
|--------------|------|--------|--------|----------|----------|----------|------|----------|----------|
| Nr2f2        | 1571 | 840.5  | 358.5  | 19.22011 | 7.599058 | -1.33872 | Down | 2.93E-45 | 1.63E-44 |
| Exoc8        | 2498 | 548.5  | 232.5  | 7.859767 | 3.10836  | -1.33833 | Down | 1.86E-30 | 9.28E-30 |
| Nde1         | 2153 | 2121   | 897.5  | 35.21863 | 13.92955 | -1.33819 | Down | #####    | #####    |
| Slc41a3      | 2263 | 944.5  | 400    | 14.91964 | 5.904518 | -1.33732 | Down | 3.58E-51 | 2.06E-50 |
| Seli         | 2636 | 1527   | 644    | 20.65892 | 8.176521 | -1.33721 | Down | 2.35E-82 | 1.58E-81 |
| Setd3        | 2794 | 2944.5 | 1247.5 | 37.64062 | 14.89842 | -1.33713 | Down | #####    | #####    |
| RGD1309926   | 3242 | 1786.5 | 759    | 19.74386 | 7.815234 | -1.33704 | Down | 1.05E-94 | 7.33E-94 |
| Tmem158      | 999  | 548    | 236    | 19.78784 | 7.84393  | -1.33497 | Down | 1.47E-29 | 7.27E-29 |
| Rab6a        | 3380 | 7561   | 3214   | 79.90123 | 31.69545 | -1.33394 | Down | 0        | 0        |
| Syt6         | 1850 | 39.5   | 17     | 0.766965 | 0.304365 | -1.33336 | Down | 0.003202 | 0.005225 |
| Polr2a       | 6616 | 10309  | 4390.5 | 55.82485 | 22.15658 | -1.33317 | Down | 0        | 0        |
| Morc4        | 4076 | 947    | 403.5  | 8.316674 | 3.301454 | -1.33291 | Down | 6.12E-51 | 3.52E-50 |
| Bcl7c        | 986  | 1035.5 | 442.5  | 37.63868 | 14.94372 | -1.33268 | Down | 3.66E-55 | 2.16E-54 |
| Olfml3       | 1758 | 2376   | 1013.5 | 48.38874 | 19.21984 | -1.33208 | Down | #####    | #####    |
| Lrrc16a      | 5007 | 2618   | 1115   | 18.71563 | 7.438805 | -1.3311  | Down | #####    | #####    |
| Gclm         | 1524 | 844.5  | 358    | 19.76078 | 7.855236 | -1.33091 | Down | 7.52E-46 | 4.19E-45 |
| Tmem63b-ps1  | 2582 | 3716.5 | 1590   | 51.63799 | 20.52828 | -1.33082 | Down | #####    | #####    |
| Fam213a      | 1210 | 621    | 265    | 18.379   | 7.312732 | -1.32958 | Down | 8.01E-34 | 4.12E-33 |
| LOC689914    | 1562 | 1570.5 | 672.5  | 36.08167 | 14.35844 | -1.32937 | Down | 2.10E-82 | 1.42E-81 |
| Cnih2        | 1365 | 165    | 70.5   | 4.34183  | 1.728    | -1.3292  | Down | 3.60E-10 | 8.77E-10 |
| LOC691631    | 3470 | 1799.5 | 770.5  | 18.61021 | 7.408354 | -1.32887 | Down | 3.72E-94 | 2.59E-93 |
| Gadd45gip1   | 1212 | 1338   | 573.5  | 39.61446 | 15.78365 | -1.3276  | Down | 1.97E-70 | 1.26E-69 |
| Pde8a        | 2560 | 1336.5 | 573    | 18.71933 | 7.462009 | -1.32689 | Down | 3.88E-70 | 2.47E-69 |
| LOC100363332 | 3542 | 72     | 31     | 0.72706  | 0.289918 | -1.32643 | Down | 4.66E-05 | 8.91E-05 |
| Prrx1        | 1375 | 5824   | 2493.5 | 151.8546 | 60.57656 | -1.32586 | Down | #####    | #####    |

|           |      |         |        |          |          |          |      |          |          |
|-----------|------|---------|--------|----------|----------|----------|------|----------|----------|
| Def8      | 3196 | 519     | 222    | 5.806551 | 2.316856 | -1.32551 | Down | 2.04E-28 | 9.96E-28 |
| Pgp       | 2535 | 1083    | 464    | 15.30311 | 6.108197 | -1.32501 | Down | 2.65E-57 | 1.58E-56 |
| Ugt1a2    | 2237 | 592     | 253    | 9.463528 | 3.778392 | -1.32461 | Down | 3.09E-32 | 1.56E-31 |
| Hyal2     | 1940 | 862     | 369    | 15.9105  | 6.352698 | -1.32454 | Down | 4.90E-46 | 2.74E-45 |
| Bag6      | 3659 | 11571   | 4970.5 | 113.5016 | 45.327   | -1.32427 | Down | 0        | 0        |
| Igf2r     | 8810 | 14803.5 | 6324   | 60.01097 | 23.9781  | -1.32351 | Down | 0        | 0        |
| Gstm7     | 1208 | 56      | 24     | 1.663572 | 0.664804 | -1.32328 | Down | 0.000317 | 0.000569 |
| Dgat1     | 1751 | 464     | 198.5  | 9.476355 | 3.787683 | -1.32302 | Down | 1.11E-25 | 5.29E-25 |
| Rbck1     | 2350 | 2599.5  | 1119   | 39.69154 | 15.86985 | -1.32254 | Down | #####    | #####    |
| Kdelc2    | 3768 | 3831.5  | 1641.5 | 36.35758 | 14.53981 | -1.32225 | Down | #####    | #####    |
| Tysnd1    | 2313 | 254.5   | 109    | 3.939842 | 1.575686 | -1.32216 | Down | 1.31E-14 | 5.41E-14 |
| Nfia      | 2200 | 1584.5  | 680    | 25.83501 | 10.33592 | -1.32166 | Down | 1.12E-82 | 7.58E-82 |
| Ywhag     | 1634 | 7372.5  | 3168.5 | 161.5886 | 64.71387 | -1.32018 | Down | 0        | 0        |
| Gsk3a     | 2155 | 2840    | 1223.5 | 47.26339 | 18.95305 | -1.31829 | Down | #####    | #####    |
| Rassf3    | 3290 | 930     | 399    | 10.10927 | 4.053963 | -1.31827 | Down | 2.47E-49 | 1.41E-48 |
| Klf16     | 2622 | 1299.5  | 558    | 17.73916 | 7.114471 | -1.31811 | Down | 4.72E-68 | 2.98E-67 |
| Agpat1    | 2091 | 5116.5  | 2203.5 | 87.75202 | 35.19923 | -1.31789 | Down | #####    | #####    |
| LOC364707 | 1200 | 1815    | 784.5  | 54.39787 | 21.82325 | -1.31768 | Down | 2.15E-93 | 1.49E-92 |
| Timm17b   | 850  | 440.5   | 190    | 18.589   | 7.458699 | -1.31745 | Down | 6.17E-24 | 2.89E-23 |
| Ralgds    | 3684 | 682     | 294.5  | 6.642422 | 2.665653 | -1.31722 | Down | 2.54E-36 | 1.33E-35 |
| Ntn3      | 2428 | 56      | 24     | 0.825786 | 0.331501 | -1.31676 | Down | 0.000317 | 0.000569 |
| Elovl1    | 1507 | 2583.5  | 1110   | 61.29434 | 24.62194 | -1.31581 | Down | #####    | #####    |
| Gpr137    | 1687 | 508     | 219    | 10.78343 | 4.33255  | -1.31553 | Down | 1.81E-27 | 8.77E-27 |
| Cdh2      | 4350 | 21484.5 | 9248   | 176.7418 | 71.01911 | -1.31536 | Down | 0        | 0        |
| Myh9      | 6060 | 15689   | 6760.5 | 92.65971 | 37.25289 | -1.31459 | Down | 0        | 0        |

|              |      |         |        |          |          |          |      |          |          |
|--------------|------|---------|--------|----------|----------|----------|------|----------|----------|
| Ralgs2       | 1570 | 306.5   | 132    | 6.988082 | 2.810484 | -1.31408 | Down | 3.82E-17 | 1.66E-16 |
| Abhd14b      | 1603 | 923.5   | 397    | 20.63019 | 8.297234 | -1.31405 | Down | 9.42E-49 | 5.33E-48 |
| Fam65a       | 4162 | 2266    | 976.5  | 19.50463 | 7.846606 | -1.31368 | Down | #####    | #####    |
| Dvl3         | 2007 | 1839.5  | 795.5  | 32.90498 | 13.24024 | -1.31338 | Down | 1.82E-94 | 1.27E-93 |
| Camkk2       | 2132 | 1347    | 580    | 22.59121 | 9.090315 | -1.31336 | Down | 3.40E-70 | 2.17E-69 |
| Med25        | 2327 | 2233.5  | 966.5  | 34.47962 | 13.87409 | -1.31335 | Down | #####    | #####    |
| Scrib        | 5547 | 4052    | 1750.5 | 26.19091 | 10.54021 | -1.31316 | Down | #####    | #####    |
| Etv1         | 6803 | 2235    | 965.5  | 11.74336 | 4.727563 | -1.31268 | Down | #####    | #####    |
| Sh2d4a       | 2461 | 75      | 32.5   | 1.089111 | 0.43853  | -1.3124  | Down | 2.76E-05 | 5.41E-05 |
| Wbp1         | 1175 | 571     | 247.5  | 17.41743 | 7.015307 | -1.31195 | Down | 1.72E-30 | 8.59E-30 |
| LOC100912459 | 2397 | 311     | 134.5  | 4.657307 | 1.87621  | -1.31167 | Down | 1.96E-17 | 8.52E-17 |
| Slc27a2      | 2963 | 42.5    | 18.5   | 0.516259 | 0.208001 | -1.31151 | Down | 0.001868 | 0.003111 |
| Porcn        | 1874 | 265.5   | 115    | 5.072211 | 2.044495 | -1.31087 | Down | 6.79E-15 | 2.84E-14 |
| Slc39a7      | 2053 | 5827    | 2523   | 101.7491 | 41.01394 | -1.31083 | Down | #####    | #####    |
| Eef1d        | 2042 | 5432    | 2344.5 | 95.16022 | 38.37039 | -1.31037 | Down | #####    | #####    |
| Actr2        | 1326 | 8891    | 3829   | 239.0905 | 96.45498 | -1.30963 | Down | 0        | 0        |
| Arhgap24     | 2728 | 539.5   | 234    | 7.080101 | 2.858216 | -1.30866 | Down | 1.09E-28 | 5.37E-28 |
| Prr5         | 1802 | 182     | 79     | 3.619477 | 1.461186 | -1.30864 | Down | 1.13E-10 | 2.81E-10 |
| Abhd11       | 1151 | 446.5   | 193.5  | 13.91728 | 5.626498 | -1.30657 | Down | 3.77E-24 | 1.77E-23 |
| Plekho1      | 1477 | 1160.5  | 504    | 28.18353 | 11.39936 | -1.3059  | Down | 1.05E-59 | 6.34E-59 |
| LOC100911597 | 7404 | 43731.5 | 18971  | 211.4809 | 85.58216 | -1.30515 | Down | 0        | 0        |
| Atp13a2      | 3905 | 806.5   | 350.5  | 7.400226 | 2.994732 | -1.30514 | Down | 4.65E-42 | 2.54E-41 |
| Pemt         | 893  | 129     | 56     | 5.170419 | 2.092678 | -1.30493 | Down | 5.86E-08 | 1.32E-07 |
| Cyb561       | 2709 | 64      | 28     | 0.844107 | 0.341761 | -1.30444 | Down | 0.000158 | 0.000287 |
| Slc19a1      | 2303 | 327     | 143    | 5.085795 | 2.059406 | -1.30424 | Down | 8.63E-18 | 3.77E-17 |

|              |      |        |        |          |          |          |      |          |          |
|--------------|------|--------|--------|----------|----------|----------|------|----------|----------|
| Psmg1        | 1146 | 1188   | 514.5  | 37.0166  | 14.99028 | -1.30414 | Down | 1.40E-61 | 8.59E-61 |
| Cd151        | 1668 | 6351.5 | 2754   | 135.9732 | 55.11671 | -1.30276 | Down | 0        | 0        |
| Gan          | 2730 | 358    | 155.5  | 4.693714 | 1.903187 | -1.30231 | Down | 1.13E-19 | 5.04E-19 |
| Chpf         | 2946 | 3917   | 1713.5 | 47.76014 | 19.38002 | -1.30124 | Down | #####    | #####    |
| Tp53i13      | 1392 | 552    | 240    | 14.18743 | 5.760226 | -1.30042 | Down | 2.91E-29 | 1.44E-28 |
| Emd          | 1274 | 1066.5 | 466    | 29.99765 | 12.19094 | -1.29904 | Down | 2.15E-54 | 1.26E-53 |
| Ptdss1       | 2547 | 3865.5 | 1681   | 54.20361 | 22.03468 | -1.29861 | Down | #####    | #####    |
| Arhgef40     | 6118 | 6951   | 3032.5 | 40.684   | 16.54048 | -1.29846 | Down | 0        | 0        |
| Igsf11       | 3675 | 481    | 210.5  | 4.699537 | 1.910768 | -1.29837 | Down | 1.63E-25 | 7.75E-25 |
| Wdtdc1       | 3942 | 1799   | 784    | 16.34252 | 6.645576 | -1.29816 | Down | 4.46E-91 | 3.09E-90 |
| RGD1306565   | 5058 | 375    | 163    | 2.653308 | 1.078954 | -1.29816 | Down | 2.15E-20 | 9.69E-20 |
| Syngn2       | 1108 | 947.5  | 415.5  | 30.72016 | 12.49284 | -1.29808 | Down | 2.69E-48 | 1.52E-47 |
| Khsrp        | 2184 | 4878.5 | 2139   | 80.2503  | 32.64532 | -1.29763 | Down | #####    | #####    |
| Ptprn        | 2952 | 256    | 112    | 3.107815 | 1.264269 | -1.2976  | Down | 3.07E-14 | 1.25E-13 |
| Ppfbp1       | 3264 | 6421.5 | 2797.5 | 70.36105 | 28.62349 | -1.29758 | Down | 0        | 0        |
| Mcrs1        | 1912 | 1467.5 | 640.5  | 27.46003 | 11.17317 | -1.29729 | Down | 1.84E-74 | 1.20E-73 |
| Nrep         | 440  | 183.5  | 80     | 14.88479 | 6.058056 | -1.29691 | Down | 1.34E-10 | 3.32E-10 |
| LOC100359528 | 1752 | 99     | 43.5   | 2.032144 | 0.827155 | -1.29677 | Down | 2.10E-06 | 4.39E-06 |
| Mrpl12       | 1563 | 1990.5 | 869    | 45.5471  | 18.54347 | -1.29645 | Down | #####    | 2.58E-99 |
| Amfr         | 3528 | 8388.5 | 3663.5 | 85.00636 | 34.67433 | -1.2937  | Down | 0        | 0        |
| Pcyt2        | 1846 | 2069   | 903.5  | 40.07702 | 16.35219 | -1.29329 | Down | #####    | #####    |
| Abca3        | 6360 | 2595.5 | 1136.5 | 14.61725 | 5.964994 | -1.29308 | Down | #####    | #####    |
| RGD1563962   | 1800 | 284.5  | 124    | 5.646978 | 2.304981 | -1.29272 | Down | 1.09E-15 | 4.61E-15 |
| Zfp428       | 1238 | 246    | 108    | 7.116422 | 2.905311 | -1.29246 | Down | 1.17E-13 | 4.46E-13 |
| LOC100910357 | 1482 | 184.5  | 81     | 4.44725  | 1.818105 | -1.29048 | Down | 1.59E-10 | 3.91E-10 |



|          |      |        |        |          |          |          |      |          |          |
|----------|------|--------|--------|----------|----------|----------|------|----------|----------|
| Cpa2     | 1306 | 48.5   | 21.5   | 1.333467 | 0.54515  | -1.29046 | Down | 0.001093 | 0.00185  |
| Zbtb8a   | 1982 | 111    | 49     | 2.01066  | 0.822227 | -1.29006 | Down | 7.52E-07 | 1.61E-06 |
| Ctnna1   | 3643 | 15188  | 6664.5 | 149.2741 | 61.10188 | -1.28867 | Down | 0        | 0        |
| Rabep2   | 2222 | 421.5  | 185.5  | 6.800122 | 2.78542  | -1.28767 | Down | 2.86E-22 | 1.32E-21 |
| Pcdh7    | 3755 | 2182.5 | 959    | 20.82018 | 8.529149 | -1.28751 | Down | #####    | #####    |
| D2hgdh   | 2279 | 119    | 52     | 1.868705 | 0.765737 | -1.28712 | Down | 2.28E-07 | 5.02E-07 |
| Lsmc1    | 711  | 1026   | 452.5  | 51.75351 | 21.21094 | -1.28685 | Down | 1.14E-51 | 6.60E-51 |
| Myo19    | 3841 | 722.5  | 318.5  | 6.728436 | 2.758747 | -1.28626 | Down | 7.00E-37 | 3.68E-36 |
| Pitpna   | 1638 | 7192   | 3163   | 157.1065 | 64.43357 | -1.28586 | Down | 0        | 0        |
| Ece2     | 3010 | 160.5  | 70.5   | 1.907567 | 0.782432 | -1.2857  | Down | 1.99E-09 | 4.73E-09 |
| Ubxn6    | 1632 | 908.5  | 400.5  | 19.90976 | 8.166524 | -1.28568 | Down | 6.28E-46 | 3.50E-45 |
| Qsox1    | 2439 | 315    | 139    | 4.632266 | 1.90015  | -1.2856  | Down | 6.36E-17 | 2.75E-16 |
| Sntb2    | 1698 | 210.5  | 93     | 4.440584 | 1.821716 | -1.28545 | Down | 1.07E-11 | 2.82E-11 |
| Cdc42ep1 | 2263 | 4317.5 | 1903.5 | 68.47954 | 28.10387 | -1.2849  | Down | #####    | #####    |
| Nr1h2    | 1959 | 2148   | 949.5  | 39.36724 | 16.16168 | -1.28442 | Down | #####    | #####    |
| Art3     | 1510 | 36.5   | 16     | 0.858693 | 0.352575 | -1.28421 | Down | 0.005486 | 0.008786 |
| Ssrp1    | 2856 | 11708  | 5155   | 146.7221 | 60.2651  | -1.28369 | Down | 0        | 0        |
| Prkcsh   | 2011 | 6055.5 | 2672   | 108.0094 | 44.37422 | -1.28336 | Down | #####    | #####    |
| Triobp   | 6725 | 5007   | 2210.5 | 26.70822 | 10.97387 | -1.28321 | Down | #####    | #####    |
| Pgm3     | 2083 | 1247.5 | 549    | 21.43167 | 8.806846 | -1.28305 | Down | 1.71E-62 | 1.05E-61 |
| Ryk      | 1785 | 4687.5 | 2067.5 | 94.11073 | 38.69568 | -1.28219 | Down | #####    | #####    |
| Dcbld1   | 2369 | 337.5  | 149    | 5.104279 | 2.102548 | -1.27957 | Down | 6.16E-18 | 2.70E-17 |
| Mybl2    | 3710 | 4262.5 | 1883.5 | 41.18022 | 16.96577 | -1.27932 | Down | #####    | #####    |
| Mir322   | 95   | 59     | 26     | 22.10858 | 9.109021 | -1.27924 | Down | 0.000317 | 0.000568 |
| Aak1     | 7976 | 1260.5 | 558    | 5.667463 | 2.335173 | -1.27917 | Down | 1.99E-62 | 1.22E-61 |

|              |       |         |         |          |          |          |      |          |          |
|--------------|-------|---------|---------|----------|----------|----------|------|----------|----------|
| Ccr4         | 1083  | 47.5    | 21      | 1.576588 | 0.649883 | -1.27855 | Down | 0.00155  | 0.002598 |
| Ntn1         | 1815  | 335     | 149     | 6.635897 | 2.735887 | -1.27828 | Down | 1.19E-17 | 5.21E-17 |
| Sephs2       | 2342  | 1202.5  | 531     | 18.35368 | 7.567078 | -1.27826 | Down | 6.47E-60 | 3.92E-59 |
| Apbb1        | 2554  | 1254    | 554.5   | 17.58958 | 7.253382 | -1.278   | Down | 2.01E-62 | 1.23E-61 |
| Retsat       | 1855  | 1579    | 697     | 30.43782 | 12.56081 | -1.27694 | Down | 2.95E-78 | 1.96E-77 |
| Rgs12        | 5331  | 1143    | 507     | 7.674517 | 3.167963 | -1.27652 | Down | 1.27E-56 | 7.55E-56 |
| LOC100912917 | 933   | 219.5   | 97      | 8.435973 | 3.482659 | -1.27637 | Down | 3.93E-12 | 1.11E-11 |
| Lig3         | 3874  | 1634.5  | 723.5   | 15.09046 | 6.233972 | -1.27541 | Down | 1.50E-80 | 1.00E-79 |
| Tcirg1       | 2505  | 989     | 439.5   | 14.16101 | 5.852117 | -1.27489 | Down | 3.65E-49 | 2.07E-48 |
| Map1b        | 11884 | 24102.5 | 10661   | 72.49667 | 29.97228 | -1.27429 | Down | 0        | 0        |
| Itga3        | 4867  | 41625.5 | 18494.5 | 306.361  | 126.8036 | -1.27264 | Down | 0        | 0        |
| Igln5        | 2539  | 72.5    | 32      | 1.021661 | 0.423268 | -1.27127 | Down | 7.81E-05 | 0.000147 |
| Npm3         | 904   | 849     | 375.5   | 33.45392 | 13.86559 | -1.27067 | Down | 7.63E-43 | 4.18E-42 |
| LOC100359600 | 1969  | 3643    | 1618.5  | 66.06351 | 27.4096  | -1.26917 | Down | #####    | #####    |
| LOC100912372 | 1716  | 59.5    | 26.5    | 1.235556 | 0.512704 | -1.26896 | Down | 0.000317 | 0.000568 |
| Mtch1        | 1807  | 5697.5  | 2533    | 112.7891 | 46.81311 | -1.26864 | Down | #####    | #####    |
| Cul4a        | 2859  | 2799    | 1247    | 35.04912 | 14.54836 | -1.26852 | Down | #####    | #####    |
| Tnfsf12      | 1576  | 548.5   | 244.5   | 12.47321 | 5.177618 | -1.26847 | Down | 7.93E-28 | 3.87E-27 |
| Twist2       | 1200  | 163.5   | 73      | 4.88574  | 2.028781 | -1.26796 | Down | 3.26E-09 | 7.68E-09 |
| LOC100911824 | 4011  | 1113    | 494     | 9.920229 | 4.119368 | -1.26795 | Down | 4.06E-55 | 2.39E-54 |
| Rab11fip3    | 5105  | 1527    | 681     | 10.71152 | 4.448113 | -1.2679  | Down | 2.89E-74 | 1.88E-73 |
| Jak3         | 3793  | 476.5   | 213     | 4.502945 | 1.870364 | -1.26755 | Down | 3.71E-24 | 1.74E-23 |
| Incenp       | 3154  | 4182    | 1861    | 47.43298 | 19.70912 | -1.26703 | Down | #####    | #####    |
| Asb13        | 1907  | 315.5   | 140     | 5.932268 | 2.46521  | -1.26687 | Down | 1.04E-16 | 4.49E-16 |
| Irak1        | 2749  | 4430.5  | 1975.5  | 57.7314  | 23.99211 | -1.2668  | Down | #####    | #####    |

|              |      |         |        |          |          |          |      |          |          |
|--------------|------|---------|--------|----------|----------|----------|------|----------|----------|
| LOC682571    | 1518 | 1411    | 626    | 33.11477 | 13.76643 | -1.26632 | Down | 1.88E-69 | 1.19E-68 |
| Gnpnat1      | 1664 | 784.5   | 349    | 16.82691 | 6.995371 | -1.2663  | Down | 4.06E-39 | 2.17E-38 |
| Ndufaf3      | 1659 | 482.5   | 215    | 10.42527 | 4.334397 | -1.26618 | Down | 1.38E-24 | 6.50E-24 |
| Cacna2d2     | 3502 | 47      | 21     | 0.483354 | 0.200977 | -1.26605 | Down | 0.00155  | 0.002598 |
| Fut8         | 1728 | 1191.5  | 529.5  | 24.61554 | 10.23546 | -1.26599 | Down | 8.92E-59 | 5.38E-58 |
| Pltp         | 2025 | 97.5    | 43.5   | 1.718507 | 0.714754 | -1.26564 | Down | 4.15E-06 | 8.53E-06 |
| Gpx3         | 1488 | 80      | 36     | 1.933079 | 0.804116 | -1.26542 | Down | 3.87E-05 | 7.48E-05 |
| Pus7         | 2464 | 1139.5  | 508    | 16.5647  | 6.890625 | -1.26541 | Down | 7.62E-56 | 4.51E-55 |
| Ppp1r12c     | 2910 | 2411.5  | 1078   | 29.68045 | 12.35999 | -1.26384 | Down | #####    | #####    |
| Psmc2        | 2920 | 15843   | 7050.5 | 193.4447 | 80.59502 | -1.26316 | Down | 0        | 0        |
| Orai1        | 1184 | 699.5   | 314.5  | 21.25748 | 8.856589 | -1.26315 | Down | 1.84E-34 | 9.49E-34 |
| Timp4        | 1701 | 42      | 19     | 0.878143 | 0.366049 | -1.26242 | Down | 0.003156 | 0.005151 |
| LOC100912851 | 5317 | 877.5   | 391    | 5.900423 | 2.459591 | -1.2624  | Down | 1.98E-43 | 1.09E-42 |
| Gsdmd        | 1712 | 1271.5  | 569    | 26.61484 | 11.09643 | -1.26213 | Down | 1.15E-61 | 7.07E-61 |
| Mbtps1       | 3895 | 5187.5  | 2322.5 | 47.67498 | 19.88504 | -1.26155 | Down | #####    | #####    |
| LOC100910713 | 2399 | 2019.5  | 907    | 30.20834 | 12.60168 | -1.26133 | Down | 3.21E-96 | 2.25E-95 |
| Col4a1       | 6579 | 4012.5  | 1795.5 | 21.84481 | 9.11439  | -1.26107 | Down | #####    | #####    |
| Hadh         | 1660 | 816     | 364    | 17.56392 | 7.331265 | -1.26048 | Down | 1.74E-40 | 9.36E-40 |
| Inpp5f       | 4794 | 1814.5  | 813    | 13.53578 | 5.650704 | -1.26028 | Down | 4.88E-87 | 3.34E-86 |
| Specc1       | 2829 | 3941    | 1762.5 | 49.85064 | 20.8158  | -1.25993 | Down | #####    | #####    |
| Shc1         | 3541 | 14968.5 | 6699   | 151.267  | 63.20033 | -1.25909 | Down | 0        | 0        |
| Deptor       | 1551 | 147     | 66     | 3.389229 | 1.416073 | -1.25906 | Down | 2.09E-08 | 4.79E-08 |
| RGD735029    | 2368 | 1442.5  | 646    | 21.80718 | 9.112239 | -1.25893 | Down | 1.27E-69 | 8.05E-69 |
| Robo2        | 8972 | 3402.5  | 1522.5 | 13.57605 | 5.673035 | -1.25887 | Down | #####    | #####    |
| Tnpo2        | 4807 | 5276.5  | 2363   | 39.25439 | 16.40706 | -1.25854 | Down | #####    | #####    |

|              |      |        |        |          |          |          |      |          |          |
|--------------|------|--------|--------|----------|----------|----------|------|----------|----------|
| LOC686432    | 1195 | 383.5  | 172.5  | 11.50781 | 4.813786 | -1.25737 | Down | 1.30E-19 | 5.81E-19 |
| Vps52        | 3196 | 2864   | 1286.5 | 32.12134 | 13.43836 | -1.25718 | Down | #####    | #####    |
| LOC687101    | 549  | 904.5  | 408.5  | 59.36327 | 24.85312 | -1.25614 | Down | 1.12E-43 | 6.15E-43 |
| Mlf2         | 1537 | 9201.5 | 4141.5 | 214.804  | 89.95812 | -1.2557  | Down | 0        | 0        |
| Setd7        | 1977 | 1182.5 | 529.5  | 21.386   | 8.956332 | -1.25569 | Down | 1.67E-57 | 9.99E-57 |
| Acat1        | 2186 | 1855.5 | 833.5  | 30.39562 | 12.73068 | -1.25555 | Down | 1.27E-88 | 8.69E-88 |
| Gmppb        | 1923 | 588    | 263.5  | 10.95345 | 4.587715 | -1.25554 | Down | 1.73E-29 | 8.56E-29 |
| Sspn         | 4842 | 723.5  | 323.5  | 5.343062 | 2.237956 | -1.25548 | Down | 5.82E-36 | 3.04E-35 |
| RGD1563307   | 822  | 172.5  | 78     | 7.514487 | 3.150573 | -1.25406 | Down | 1.92E-09 | 4.57E-09 |
| RGD1311952   | 1424 | 86     | 39     | 2.170328 | 0.909962 | -1.25404 | Down | 2.28E-05 | 4.48E-05 |
| Vac14        | 3093 | 1814   | 817.5  | 21.03715 | 8.82246  | -1.25369 | Down | 3.32E-86 | 2.26E-85 |
| Caskin2      | 4879 | 741.5  | 334    | 5.441844 | 2.282598 | -1.25342 | Down | 3.38E-36 | 1.77E-35 |
| Tle1         | 2892 | 497    | 224    | 6.151254 | 2.580686 | -1.25313 | Down | 8.10E-25 | 3.83E-24 |
| Cep97        | 2817 | 494.5  | 221.5  | 6.268918 | 2.631107 | -1.25255 | Down | 5.06E-25 | 2.40E-24 |
| Galt         | 1375 | 131.5  | 59.5   | 3.429894 | 1.439829 | -1.25227 | Down | 1.35E-07 | 2.99E-07 |
| Wdr83        | 1168 | 278    | 125.5  | 8.520336 | 3.579276 | -1.25124 | Down | 1.29E-14 | 5.35E-14 |
| Olr1328      | 924  | 58.5   | 26.5   | 2.275737 | 0.956061 | -1.25116 | Down | 0.000447 | 0.000794 |
| Aars2        | 3323 | 471.5  | 213    | 5.08582  | 2.136801 | -1.25103 | Down | 1.88E-23 | 8.73E-23 |
| LOC100909510 | 1351 | 1583   | 715    | 41.90645 | 17.62292 | -1.24972 | Down | 4.84E-75 | 3.16E-74 |
| Bst2         | 809  | 177.5  | 79.5   | 7.854979 | 3.303711 | -1.24952 | Down | 6.04E-10 | 1.46E-09 |
| Tom1l2       | 1953 | 693.5  | 313    | 12.73653 | 5.359075 | -1.24892 | Down | 7.91E-34 | 4.07E-33 |
| Lphn3        | 5413 | 654    | 296    | 4.325458 | 1.82021  | -1.24875 | Down | 6.86E-32 | 3.46E-31 |
| Sirpa        | 3880 | 1972.5 | 890    | 18.22556 | 7.669913 | -1.24868 | Down | 3.59E-93 | 2.50E-92 |
| LOC100912251 | 2251 | 113    | 51     | 1.802174 | 0.758431 | -1.24865 | Down | 1.04E-06 | 2.21E-06 |
| Cdc37        | 1604 | 8884.5 | 4015   | 198.5476 | 83.59972 | -1.24791 | Down | 0        | 0        |

|              |       |         |        |          |          |          |      |          |          |
|--------------|-------|---------|--------|----------|----------|----------|------|----------|----------|
| Hn1          | 1364  | 3357.5  | 1511.5 | 87.90401 | 37.02259 | -1.24752 | Down | #####    | #####    |
| Nefm         | 3067  | 1414    | 638    | 16.4987  | 6.952783 | -1.24669 | Down | 2.31E-67 | 1.45E-66 |
| Slc6a9       | 3211  | 610.5   | 276    | 6.817938 | 2.873392 | -1.24658 | Down | 7.14E-30 | 3.55E-29 |
| Lrsam1       | 4894  | 2086.5  | 941.5  | 15.24727 | 6.426304 | -1.24649 | Down | 1.53E-98 | 1.08E-97 |
| Nosip        | 1442  | 704.5   | 319.5  | 17.48674 | 7.370898 | -1.24635 | Down | 3.99E-34 | 2.05E-33 |
| Qpctl        | 2166  | 631.5   | 285    | 10.42642 | 4.395079 | -1.24628 | Down | 5.99E-31 | 3.00E-30 |
| Iqsec2       | 2969  | 1208.5  | 548.5  | 14.61801 | 6.162653 | -1.24612 | Down | 3.34E-57 | 2.00E-56 |
| Ubr4         | 15828 | 8008    | 3615.5 | 18.08438 | 7.627468 | -1.24547 | Down | 0        | 0        |
| Hsd3b7       | 1795  | 412     | 186    | 8.219269 | 3.469609 | -1.24424 | Down | 8.90E-21 | 4.04E-20 |
| Capg         | 1500  | 7868    | 3566.5 | 188.0822 | 79.43281 | -1.24356 | Down | 0        | 0        |
| Grb14        | 1950  | 794     | 359.5  | 14.55608 | 6.148927 | -1.24322 | Down | 1.95E-38 | 1.04E-37 |
| Stat5a       | 3616  | 459.5   | 209    | 4.555765 | 1.925233 | -1.24266 | Down | 1.33E-22 | 6.16E-22 |
| Wasf2        | 1705  | 2036    | 925.5  | 42.88909 | 18.12472 | -1.24265 | Down | 7.09E-95 | 4.95E-94 |
| Trim46       | 2780  | 215.5   | 98     | 2.779929 | 1.175326 | -1.24199 | Down | 2.37E-11 | 6.06E-11 |
| Ppp1ca       | 1392  | 10058   | 4561.5 | 258.7184 | 109.4185 | -1.24153 | Down | 0        | 0        |
| Ddr1         | 2834  | 4636    | 2108.5 | 58.68453 | 24.82443 | -1.24122 | Down | #####    | #####    |
| Brd3         | 3133  | 2085.5  | 946    | 23.8573  | 10.09369 | -1.24098 | Down | 2.26E-97 | 1.59E-96 |
| Rab3b        | 1159  | 46      | 21     | 1.424173 | 0.602608 | -1.24083 | Down | 0.002186 | 0.003613 |
| Cbr3         | 1175  | 464     | 211    | 14.12374 | 5.977801 | -1.24044 | Down | 6.91E-23 | 3.20E-22 |
| Gpsm1        | 3425  | 710.5   | 322.5  | 7.44106  | 3.149897 | -1.2402  | Down | 2.41E-34 | 1.24E-33 |
| LOC100910156 | 2635  | 13343.5 | 6062.5 | 181.1373 | 76.68641 | -1.24004 | Down | 0        | 0        |
| Traf4af1     | 1490  | 1374    | 623.5  | 32.93508 | 13.94525 | -1.23985 | Down | 7.02E-65 | 4.35E-64 |
| Zfp710       | 2290  | 571.5   | 261    | 8.96261  | 3.795789 | -1.23952 | Down | 1.60E-27 | 7.75E-27 |
| Plod1        | 2912  | 7219    | 3284   | 88.82922 | 37.63767 | -1.23886 | Down | 0        | 0        |
| LOC679522    | 999   | 254.5   | 115.5  | 9.086387 | 3.851478 | -1.23829 | Down | 2.59E-13 | 9.24E-13 |

|              |      |          |          |          |          |          |      |          |          |
|--------------|------|----------|----------|----------|----------|----------|------|----------|----------|
| LOC100910396 | 2908 | 800.5    | 361.5    | 9.812274 | 4.15921  | -1.23828 | Down | 7.33E-39 | 3.92E-38 |
| RGD1560917   | 668  | 41       | 18.5     | 2.185117 | 0.926656 | -1.2376  | Down | 0.00267  | 0.004377 |
| Chd4         | 6578 | 17531    | 7968.5   | 95.32608 | 40.42935 | -1.23747 | Down | 0        | 0        |
| LOC294909    | 1989 | 121.5    | 55.5     | 2.18398  | 0.926404 | -1.23725 | Down | 5.19E-07 | 1.12E-06 |
| Rbm15b       | 3073 | 1796     | 818      | 20.94487 | 8.885458 | -1.23708 | Down | 1.70E-83 | 1.15E-82 |
| Tfeb         | 2291 | 469.5    | 214.5    | 7.35279  | 3.119433 | -1.23701 | Down | 5.73E-23 | 2.66E-22 |
| Tufm         | 1884 | 2300     | 1046     | 43.69598 | 18.5431  | -1.23662 | Down | #####    | #####    |
| Lrrn3        | 3080 | 629      | 285.5    | 7.29353  | 3.095807 | -1.2363  | Down | 1.14E-30 | 5.70E-30 |
| Sel1l        | 3939 | 3525.5   | 1601.5   | 31.98326 | 13.58031 | -1.2358  | Down | #####    | #####    |
| Hyal1        | 1350 | 97.5     | 44.5     | 2.582858 | 1.097528 | -1.23471 | Down | 6.82E-06 | 1.38E-05 |
| Clasp1       | 7590 | 3920.5   | 1787.5   | 18.48816 | 7.857559 | -1.23445 | Down | #####    | #####    |
| Arl2bp       | 2038 | 2654.5   | 1209.5   | 46.5232  | 19.7866  | -1.23343 | Down | #####    | #####    |
| Foxq1        | 2634 | 85       | 39       | 1.160614 | 0.493654 | -1.23332 | Down | 3.18E-05 | 6.17E-05 |
| Dab2ip       | 6508 | 4842     | 2212     | 26.65568 | 11.34506 | -1.23238 | Down | #####    | #####    |
| Ttl          | 1393 | 747.5    | 340.5    | 19.23401 | 8.189706 | -1.23178 | Down | 8.50E-36 | 4.43E-35 |
| Slc9a3r1     | 1492 | 3270.5   | 1496     | 78.65313 | 33.492   | -1.23169 | Down | #####    | #####    |
| Spp1         | 1503 | 246035.5 | 112363.5 | 5861.423 | 2496.032 | -1.23161 | Down | 0        | 0        |
| Mis18bp1     | 4059 | 783      | 356.5    | 6.876899 | 2.929797 | -1.23096 | Down | 1.61E-37 | 8.49E-37 |
| Fam100b      | 1277 | 3755     | 1718     | 105.4585 | 44.93073 | -1.2309  | Down | #####    | #####    |
| Fam115c      | 2760 | 107      | 48.5     | 1.383301 | 0.58946  | -1.23065 | Down | 1.75E-06 | 3.67E-06 |
| Ppfia1       | 5191 | 3682     | 1684     | 25.3748  | 10.81499 | -1.23036 | Down | #####    | #####    |
| Hnrnpul2     | 5666 | 8844.5   | 4036     | 55.78513 | 23.77746 | -1.23029 | Down | 0        | 0        |
| Ckap5        | 6651 | 7935.5   | 3615     | 42.57386 | 18.14678 | -1.23025 | Down | 0        | 0        |
| Fdft1        | 3173 | 5399.5   | 2464.5   | 60.80574 | 25.91867 | -1.23022 | Down | #####    | #####    |
| LOC690085    | 846  | 94.5     | 43       | 4.003503 | 1.70654  | -1.23019 | Down | 1.13E-05 | 2.26E-05 |

|              |      |        |        |          |          |          |      |          |          |
|--------------|------|--------|--------|----------|----------|----------|------|----------|----------|
| Dpagt1       | 1840 | 1843   | 843    | 35.84656 | 15.28988 | -1.22926 | Down | 6.67E-85 | 4.53E-84 |
| Tmcc2        | 3716 | 254.5  | 116.5  | 2.453718 | 1.046828 | -1.22894 | Down | 4.17E-13 | 1.42E-12 |
| Masp1        | 5112 | 503.5  | 231    | 3.532108 | 1.50762  | -1.22826 | Down | 3.24E-24 | 1.52E-23 |
| Rogdi        | 1553 | 882    | 404.5  | 20.36494 | 8.694021 | -1.22799 | Down | 1.93E-41 | 1.05E-40 |
| Gmpr         | 1452 | 366.5  | 168    | 9.044898 | 3.862317 | -1.22764 | Down | 4.64E-18 | 2.04E-17 |
| Fbx14        | 3819 | 1912   | 875.5  | 17.91024 | 7.648102 | -1.22761 | Down | 6.37E-88 | 4.37E-87 |
| Ctdsp1       | 2323 | 3793.5 | 1737.5 | 58.50858 | 24.99024 | -1.22728 | Down | #####    | #####    |
| Tshz1        | 5076 | 5150   | 2362.5 | 36.3781  | 15.54182 | -1.22691 | Down | #####    | #####    |
| Pard3b       | 3612 | 366.5  | 168    | 3.629162 | 1.55138  | -1.22608 | Down | 4.64E-18 | 2.04E-17 |
| Copb2        | 3025 | 9971.5 | 4567   | 117.8616 | 50.38855 | -1.22593 | Down | 0        | 0        |
| Arhgef19     | 3648 | 579    | 266.5  | 5.690257 | 2.43274  | -1.22591 | Down | 1.30E-27 | 6.31E-27 |
| Gga1         | 2765 | 2004   | 922    | 26.01543 | 11.12255 | -1.22588 | Down | 4.49E-91 | 3.10E-90 |
| Vash2        | 3761 | 502.5  | 229.5  | 4.769723 | 2.039331 | -1.22581 | Down | 1.74E-24 | 8.21E-24 |
| Insc         | 2341 | 258.5  | 118    | 3.935979 | 1.682889 | -1.22578 | Down | 2.96E-13 | 1.05E-12 |
| Adarb2       | 2720 | 45     | 20.5   | 0.590105 | 0.252456 | -1.22494 | Down | 0.001858 | 0.003095 |
| Usp28        | 4171 | 997    | 458    | 8.551529 | 3.659161 | -1.22467 | Down | 2.36E-46 | 1.32E-45 |
| Ppp6r1       | 4345 | 4356   | 2003.5 | 35.89916 | 15.38083 | -1.22282 | Down | #####    | #####    |
| Gramd4       | 2482 | 880.5  | 404    | 12.70269 | 5.44459  | -1.22224 | Down | 3.64E-41 | 1.97E-40 |
| Ccna2        | 1730 | 4855.5 | 2232   | 100.5196 | 43.08466 | -1.22223 | Down | #####    | #####    |
| Adamts8      | 3631 | 3211.5 | 1479   | 31.64822 | 13.56733 | -1.22199 | Down | #####    | #####    |
| LOC100912585 | 3068 | 1038.5 | 478.5  | 12.14578 | 5.210248 | -1.22103 | Down | 5.93E-48 | 3.34E-47 |
| Nploc4       | 3727 | 3375.5 | 1552   | 32.36483 | 13.88509 | -1.22089 | Down | #####    | #####    |
| LOC100362342 | 847  | 198    | 91     | 8.347309 | 3.5817   | -1.22067 | Down | 2.07E-10 | 5.08E-10 |
| LOC100362583 | 884  | 4096.5 | 1885   | 165.7165 | 71.1212  | -1.22037 | Down | #####    | #####    |
| LOC100911548 | 1250 | 200    | 92.5   | 5.73541  | 2.461624 | -1.22029 | Down | 1.74E-10 | 4.28E-10 |

|              |      |        |        |          |          |          |      |          |          |
|--------------|------|--------|--------|----------|----------|----------|------|----------|----------|
| Rgs14        | 2854 | 602.5  | 278    | 7.559222 | 3.247068 | -1.2191  | Down | 2.34E-28 | 1.14E-27 |
| Slc44a1      | 2851 | 5089.5 | 2340   | 63.78568 | 27.4005  | -1.21903 | Down | #####    | #####    |
| RGD1309594   | 1887 | 747    | 345    | 14.18513 | 6.094568 | -1.21878 | Down | 8.75E-35 | 4.53E-34 |
| Tmem164      | 5337 | 946.5  | 436    | 6.338146 | 2.723281 | -1.21872 | Down | 8.79E-44 | 4.84E-43 |
| Slc45a1      | 2482 | 104.5  | 48     | 1.509012 | 0.648577 | -1.21826 | Down | 4.70E-06 | 9.62E-06 |
| Ltbr         | 2103 | 4025   | 1860   | 68.68193 | 29.52172 | -1.21815 | Down | #####    | #####    |
| Klk1         | 873  | 53     | 24.5   | 2.171093 | 0.933364 | -1.21791 | Down | 0.000901 | 0.001537 |
| Men1         | 2996 | 953.5  | 440    | 11.41327 | 4.907476 | -1.21766 | Down | 6.13E-44 | 3.38E-43 |
| Rtn4r11      | 3309 | 66     | 30.5   | 0.714585 | 0.307328 | -1.21733 | Down | 0.000219 | 0.000397 |
| LOC100911734 | 2954 | 1490.5 | 688    | 18.07718 | 7.774721 | -1.21731 | Down | 1.09E-67 | 6.84E-67 |
| Abhd2        | 2023 | 7182.5 | 3308.5 | 126.9439 | 54.60688 | -1.21704 | Down | 0        | 0        |
| Acmsd        | 1011 | 40     | 18.5   | 1.410084 | 0.60693  | -1.21618 | Down | 0.003794 | 0.006168 |
| Tom40b       | 927  | 168    | 77.5   | 6.467667 | 2.785898 | -1.2151  | Down | 4.37E-09 | 1.03E-08 |
| Vcl          | 5270 | 16807  | 7753   | 114.0461 | 49.12938 | -1.21496 | Down | 0        | 0        |
| Cask         | 3819 | 860    | 398    | 8.048861 | 3.469062 | -1.21424 | Down | 1.25E-39 | 6.70E-39 |
| Grn          | 1956 | 8699.5 | 4023.5 | 159.2214 | 68.64483 | -1.21381 | Down | 0        | 0        |
| Sapcd2       | 1581 | 1119   | 518.5  | 25.36873 | 10.93891 | -1.21358 | Down | 5.10E-51 | 2.93E-50 |
| LOC684934    | 1993 | 1268.5 | 587    | 22.77911 | 9.829834 | -1.21247 | Down | 1.43E-57 | 8.54E-57 |
| Map7d2       | 3783 | 167    | 77     | 1.574947 | 0.680038 | -1.21162 | Down | 6.03E-09 | 1.41E-08 |
| Reep5        | 2917 | 9531   | 4406   | 116.7382 | 50.41018 | -1.21149 | Down | 0        | 0        |
| LOC100912004 | 807  | 221.5  | 102.5  | 9.841796 | 4.25006  | -1.21144 | Down | 2.27E-11 | 5.81E-11 |
| LOC100363720 | 896  | 74     | 34.5   | 2.962992 | 1.280017 | -1.21089 | Down | 0.000107 | 0.0002   |
| Rcbt2        | 1971 | 296.5  | 137.5  | 5.376952 | 2.324777 | -1.2097  | Down | 1.16E-14 | 4.80E-14 |
| Rap1gds1     | 3397 | 3792.5 | 1757   | 39.92816 | 17.26386 | -1.20965 | Down | #####    | #####    |
| Galnt10      | 1812 | 6258.5 | 2910.5 | 123.8796 | 53.58762 | -1.20897 | Down | #####    | #####    |



|              |      |        |         |          |          |          |      |          |          |
|--------------|------|--------|---------|----------|----------|----------|------|----------|----------|
| Hdlbp        | 4414 | 26844  | 12431.5 | 217.48   | 94.08285 | -1.20888 | Down | 0        | 0        |
| Pcsk1n       | 945  | 344    | 161     | 13.09867 | 5.66717  | -1.20872 | Down | 1.92E-16 | 8.24E-16 |
| Bop1         | 2587 | 2360.5 | 1097    | 32.66349 | 14.13832 | -1.20807 | Down | #####    | #####    |
| Prc1         | 2928 | 8635.5 | 4002.5  | 105.4181 | 45.65197 | -1.20737 | Down | 0        | 0        |
| Mkl1         | 4378 | 2518.5 | 1173    | 20.62621 | 8.936507 | -1.2067  | Down | #####    | #####    |
| Abl1         | 6158 | 2636.5 | 1227    | 15.34001 | 6.64643  | -1.20665 | Down | #####    | #####    |
| Psmb10       | 1021 | 1073.5 | 498     | 37.58755 | 16.29347 | -1.20596 | Down | 9.79E-49 | 5.54E-48 |
| Plbd2        | 2217 | 4511.5 | 2097    | 72.87748 | 31.59104 | -1.20596 | Down | #####    | #####    |
| Sdpr         | 2148 | 75     | 35      | 1.246478 | 0.54066  | -1.20506 | Down | 0.000125 | 0.000229 |
| LOC100911978 | 2569 | 48.5   | 23      | 0.676777 | 0.293654 | -1.20457 | Down | 0.002943 | 0.00481  |
| Sdsl         | 1378 | 74     | 34.5    | 1.929919 | 0.837515 | -1.20435 | Down | 0.000107 | 0.0002   |
| Pcyox1       | 2292 | 2706.5 | 1258.5  | 42.22786 | 18.33746 | -1.2034  | Down | #####    | #####    |
| Gatad2a      | 4510 | 6264.5 | 2923    | 49.81116 | 21.6413  | -1.20268 | Down | #####    | #####    |
| LOC685487    | 2451 | 116.5  | 54      | 1.706567 | 0.741448 | -1.20268 | Down | 1.64E-06 | 3.45E-06 |
| LOC100912611 | 600  | 221.5  | 103     | 13.27353 | 5.770404 | -1.20181 | Down | 3.61E-11 | 9.10E-11 |
| Eif3i        | 1098 | 4106.5 | 1916    | 133.8326 | 58.24657 | -1.20018 | Down | #####    | #####    |
| Runx3        | 1230 | 306    | 143.5   | 8.945061 | 3.893299 | -1.2001  | Down | 7.81E-15 | 3.26E-14 |
| Acadm        | 1954 | 1121.5 | 522.5   | 20.50334 | 8.925568 | -1.19984 | Down | 1.70E-50 | 9.71E-50 |
| Agap1        | 4330 | 2493   | 1166    | 20.62619 | 8.980351 | -1.19963 | Down | #####    | #####    |
| Heatr2       | 3417 | 1209.5 | 564     | 12.66611 | 5.514944 | -1.19956 | Down | 4.03E-54 | 2.36E-53 |
| LOC685909    | 1896 | 1395.5 | 651     | 26.28058 | 11.4431  | -1.19952 | Down | 3.97E-62 | 2.43E-61 |
| Amph         | 2052 | 848    | 396.5   | 14.80717 | 6.447915 | -1.19939 | Down | 2.14E-38 | 1.14E-37 |
| Rps6         | 801  | 7120.5 | 3307.5  | 316.866  | 138.0158 | -1.19904 | Down | 0        | 0        |
| Nradd        | 871  | 109    | 51      | 4.466189 | 1.945611 | -1.19882 | Down | 3.83E-06 | 7.88E-06 |
| Mtm1         | 2536 | 747.5  | 348.5   | 10.53611 | 4.59036  | -1.19866 | Down | 3.46E-34 | 1.79E-33 |

|              |      |        |        |          |          |          |      |          |          |
|--------------|------|--------|--------|----------|----------|----------|------|----------|----------|
| Itm2c        | 2083 | 8071   | 3783   | 139.0198 | 60.59679 | -1.19798 | Down | 0        | 0        |
| Hoxb5        | 1534 | 57.5   | 27     | 1.344466 | 0.586469 | -1.19691 | Down | 0.001016 | 0.001722 |
| LOC100910210 | 761  | 1510.5 | 706    | 70.92362 | 30.93954 | -1.19681 | Down | 7.72E-67 | 4.84E-66 |
| Icmt         | 1767 | 1131   | 527.5  | 22.85956 | 9.974303 | -1.19651 | Down | 7.29E-51 | 4.18E-50 |
| LOC686105    | 977  | 353.5  | 166    | 13.01319 | 5.681895 | -1.19553 | Down | 1.11E-16 | 4.81E-16 |
| LOC683007    | 4590 | 7908.5 | 3700.5 | 61.57869 | 26.88881 | -1.19543 | Down | 0        | 0        |
| Csnk1e       | 1251 | 1215   | 569.5  | 34.84288 | 15.21578 | -1.1953  | Down | 6.00E-54 | 3.51E-53 |
| Nudt16l1     | 1288 | 673    | 314    | 18.65411 | 8.147717 | -1.19503 | Down | 7.18E-31 | 3.59E-30 |
| Rfx2         | 3147 | 286.5  | 134.5  | 3.265235 | 1.427066 | -1.19413 | Down | 6.83E-14 | 2.69E-13 |
| Setx         | 8588 | 2344   | 1096   | 9.736592 | 4.255897 | -1.19395 | Down | #####    | #####    |
| Rnf5         | 1142 | 736    | 346    | 23.11593 | 10.1052  | -1.19379 | Down | 4.29E-33 | 2.19E-32 |
| Sympk        | 4031 | 3929.5 | 1844   | 34.94374 | 15.27608 | -1.19376 | Down | #####    | #####    |
| Ecm1         | 1913 | 1690   | 793.5  | 31.6755  | 13.85028 | -1.19345 | Down | 4.94E-74 | 3.21E-73 |
| Bckdhb       | 1491 | 754.5  | 353    | 18.07665 | 7.906267 | -1.19306 | Down | 3.78E-34 | 1.95E-33 |
| Uggt1        | 5053 | 6247   | 2926.5 | 44.18281 | 19.32449 | -1.19305 | Down | #####    | #####    |
| Adrb1        | 1401 | 101    | 47.5   | 2.588257 | 1.132279 | -1.19275 | Down | 7.74E-06 | 1.57E-05 |
| Spred2       | 1233 | 1312   | 616.5  | 38.16521 | 16.70545 | -1.19194 | Down | 8.32E-58 | 4.99E-57 |
| Wipf1        | 3968 | 4429.5 | 2078.5 | 39.94104 | 17.48501 | -1.19175 | Down | #####    | #####    |
| Anxa4        | 1988 | 4785.5 | 2240.5 | 86.02798 | 37.66514 | -1.19158 | Down | #####    | #####    |
| Mapk7        | 2738 | 498    | 235    | 6.540462 | 2.864244 | -1.19124 | Down | 9.67E-23 | 4.47E-22 |
| RGD1303003   | 1301 | 846.5  | 397    | 23.29901 | 10.20389 | -1.19115 | Down | 6.27E-38 | 3.32E-37 |
| Slc35b1      | 1287 | 2893.5 | 1358.5 | 80.42632 | 35.23919 | -1.19049 | Down | #####    | #####    |
| Csda         | 1845 | 13352  | 6272   | 259.0706 | 113.5297 | -1.19028 | Down | 0        | 0        |
| Prmt2        | 2014 | 1197   | 562.5  | 21.2896  | 9.337504 | -1.18904 | Down | 6.77E-53 | 3.94E-52 |
| Mfsd10       | 1371 | 1174.5 | 553    | 30.67359 | 13.46149 | -1.18816 | Down | 1.46E-51 | 8.40E-51 |

|              |       |         |        |          |          |          |      |          |          |
|--------------|-------|---------|--------|----------|----------|----------|------|----------|----------|
| Lrn4         | 2368  | 1836.5  | 866    | 27.81304 | 12.20683 | -1.18807 | Down | 2.14E-79 | 1.42E-78 |
| Smarcd3      | 1700  | 714     | 336    | 15.03672 | 6.599864 | -1.18798 | Down | 4.36E-32 | 2.20E-31 |
| Wfdc1        | 1071  | 126.5   | 59.5   | 4.230513 | 1.856924 | -1.18792 | Down | 6.83E-07 | 1.47E-06 |
| LOC100909978 | 1406  | 186.5   | 87.5   | 4.7467   | 2.083852 | -1.18767 | Down | 1.47E-09 | 3.52E-09 |
| Cry1         | 2938  | 525.5   | 247.5  | 6.389665 | 2.806258 | -1.18709 | Down | 4.94E-24 | 2.31E-23 |
| Hdac9        | 3503  | 188     | 88.5   | 1.926318 | 0.846184 | -1.1868  | Down | 1.24E-09 | 2.97E-09 |
| Hap1         | 3126  | 459.5   | 216.5  | 5.261443 | 2.311579 | -1.18658 | Down | 3.37E-21 | 1.53E-20 |
| Csnk1g2      | 2405  | 6052.5  | 2858   | 90.22574 | 39.64778 | -1.1863  | Down | #####    | #####    |
| Socs7        | 2633  | 545     | 256.5  | 7.411064 | 3.257413 | -1.18595 | Down | 5.74E-25 | 2.71E-24 |
| Pgls         | 2376  | 1795    | 851    | 27.1604  | 11.94018 | -1.18568 | Down | 7.91E-77 | 5.21E-76 |
| lfitm2       | 630   | 559.5   | 263    | 31.72021 | 13.95196 | -1.18493 | Down | 1.74E-25 | 8.30E-25 |
| Stard10      | 1334  | 414.5   | 195    | 11.1149  | 4.889827 | -1.18464 | Down | 3.08E-19 | 1.37E-18 |
| LOC100911832 | 2107  | 120.5   | 57     | 2.047951 | 0.901067 | -1.18448 | Down | 1.83E-06 | 3.84E-06 |
| LOC100911084 | 1284  | 287.5   | 136    | 8.032085 | 3.535597 | -1.18382 | Down | 1.23E-13 | 4.68E-13 |
| Mid1ip1      | 1925  | 2519.5  | 1189   | 46.89364 | 20.64188 | -1.18382 | Down | #####    | #####    |
| Cyp26b1      | 4552  | 2750.5  | 1300   | 21.64969 | 9.533316 | -1.1833  | Down | #####    | #####    |
| Vps8         | 4880  | 1129    | 532    | 8.262675 | 3.640079 | -1.18264 | Down | 1.29E-49 | 7.36E-49 |
| Hsd17b7      | 1704  | 1204.5  | 570    | 25.30994 | 11.15228 | -1.18237 | Down | 2.79E-52 | 1.62E-51 |
| Macf1        | 23521 | 11432.5 | 5384   | 17.35572 | 7.648425 | -1.18218 | Down | 0        | 0        |
| LOC100912795 | 2256  | 1161    | 550.5  | 18.47249 | 8.140731 | -1.18215 | Down | 2.09E-50 | 1.19E-49 |
| Anks1a       | 5616  | 931.5   | 441.5  | 5.94393  | 2.619645 | -1.18205 | Down | 9.01E-41 | 4.86E-40 |
| Tns1         | 6126  | 3940    | 1866   | 23.07014 | 10.16885 | -1.18187 | Down | #####    | #####    |
| Mtmr4        | 5683  | 2581.5  | 1218   | 16.24115 | 7.159693 | -1.18168 | Down | #####    | #####    |
| Reln         | 11453 | 7754    | 3658.5 | 24.20181 | 10.67096 | -1.18143 | Down | 0        | 0        |
| Sytl2        | 4044  | 3237.5  | 1525.5 | 28.59809 | 12.61049 | -1.18129 | Down | #####    | #####    |

|              |       |         |        |          |          |          |      |          |          |
|--------------|-------|---------|--------|----------|----------|----------|------|----------|----------|
| Fam89b       | 1215  | 1532.5  | 725.5  | 45.19842 | 19.9311  | -1.18125 | Down | 4.31E-66 | 2.69E-65 |
| RGD1560603   | 4048  | 511.5   | 243    | 4.537459 | 2.001308 | -1.18094 | Down | 6.22E-23 | 2.88E-22 |
| Adams1       | 4395  | 5393.5  | 2546.5 | 43.87988 | 19.35658 | -1.18074 | Down | #####    | #####    |
| Psmc4        | 1376  | 3840    | 1815.5 | 99.89144 | 44.06803 | -1.18063 | Down | #####    | #####    |
| Tgm2         | 3526  | 1292    | 610.5  | 13.11237 | 5.786415 | -1.18019 | Down | 2.71E-56 | 1.61E-55 |
| Wdfy3        | 14272 | 4824    | 2282   | 12.08296 | 5.332343 | -1.18013 | Down | #####    | #####    |
| Ankrd13a     | 3672  | 6038    | 2861.5 | 58.91804 | 26.00907 | -1.17969 | Down | #####    | #####    |
| Dpep2        | 1658  | 42      | 20     | 0.906105 | 0.400022 | -1.1796  | Down | 0.005152 | 0.008265 |
| Rcor2l1      | 2344  | 665.5   | 315.5  | 10.17889 | 4.494407 | -1.17938 | Down | 1.34E-29 | 6.65E-29 |
| Xylt1        | 2718  | 146     | 69     | 1.924663 | 0.849886 | -1.17926 | Down | 1.19E-07 | 2.64E-07 |
| Cds2         | 1523  | 450.5   | 213.5  | 10.56747 | 4.667586 | -1.17888 | Down | 1.42E-20 | 6.44E-20 |
| Ncoa3        | 7462  | 1328    | 628.5  | 6.376583 | 2.816586 | -1.17884 | Down | 1.28E-57 | 7.67E-57 |
| Cmpk2        | 3054  | 81.5    | 38.5   | 0.953139 | 0.421035 | -1.17874 | Down | 7.29E-05 | 0.000138 |
| Npdc1        | 1386  | 1870    | 889    | 48.40805 | 21.38945 | -1.17835 | Down | 1.71E-79 | 1.14E-78 |
| Svs1         | 2867  | 48.5    | 23     | 0.607432 | 0.268468 | -1.17797 | Down | 0.002943 | 0.00481  |
| Slc10a7      | 1023  | 378     | 179.5  | 13.23765 | 5.852476 | -1.17753 | Down | 1.64E-17 | 7.16E-17 |
| Nisch        | 5575  | 14640.5 | 6955   | 94.14871 | 41.62679 | -1.17743 | Down | 0        | 0        |
| Rp2          | 4228  | 571     | 270    | 4.814289 | 2.129314 | -1.17693 | Down | 9.81E-26 | 4.69E-25 |
| LOC100911130 | 837   | 420.5   | 200    | 18.01446 | 7.96913  | -1.17666 | Down | 4.50E-19 | 2.00E-18 |
| Dazap1       | 1574  | 4734.5  | 2254.5 | 108.0275 | 47.79633 | -1.17643 | Down | #####    | #####    |
| Tmem8a       | 3455  | 1204.5  | 571.5  | 12.49444 | 5.529758 | -1.176   | Down | 4.35E-52 | 2.51E-51 |
| Cap1         | 2584  | 16296.5 | 7734   | 225.8398 | 99.96513 | -1.1758  | Down | 0        | 0        |
| Mmp11        | 2253  | 737.5   | 351    | 11.76054 | 5.206601 | -1.17554 | Down | 2.92E-32 | 1.48E-31 |
| Pfas         | 4488  | 1937.5  | 916.5  | 15.42774 | 6.830696 | -1.17542 | Down | 3.31E-83 | 2.24E-82 |
| Sugp2        | 4293  | 882.5   | 418    | 7.35459  | 3.258767 | -1.17432 | Down | 1.13E-38 | 6.01E-38 |

|              |       |        |        |          |          |          |      |          |          |
|--------------|-------|--------|--------|----------|----------|----------|------|----------|----------|
| Ppap2a       | 1290  | 2051   | 976.5  | 56.89079 | 25.21618 | -1.17385 | Down | 7.97E-87 | 5.44E-86 |
| Pkn3         | 2880  | 2427.5 | 1155.5 | 30.19758 | 13.39327 | -1.17292 | Down | #####    | #####    |
| Srd5a1       | 2638  | 326    | 154.5  | 4.418342 | 1.960316 | -1.17242 | Down | 2.21E-15 | 9.35E-15 |
| Dazap2       | 1778  | 3960   | 1883   | 79.62495 | 35.33772 | -1.17201 | Down | #####    | #####    |
| LOC100911729 | 936   | 124    | 58.5   | 4.711107 | 2.091003 | -1.17187 | Down | 8.14E-07 | 1.74E-06 |
| Ric8a        | 2567  | 1752   | 833    | 24.41813 | 10.83904 | -1.17172 | Down | 1.42E-74 | 9.26E-74 |
| LOC100909913 | 1952  | 171    | 81     | 3.130293 | 1.389566 | -1.17166 | Down | 1.07E-08 | 2.49E-08 |
| Gtbbp1       | 2647  | 1486   | 708    | 20.10157 | 8.928018 | -1.1709  | Down | 3.01E-63 | 1.86E-62 |
| LOC100363005 | 8687  | 5527.5 | 2625.5 | 22.73977 | 10.09977 | -1.17089 | Down | #####    | #####    |
| Capn2        | 3556  | 9818   | 4667   | 98.72506 | 43.84948 | -1.17086 | Down | 0        | 0        |
| Pafah1b3     | 865   | 346.5  | 165.5  | 14.3469  | 6.374875 | -1.17027 | Down | 6.21E-16 | 2.65E-15 |
| Msx1         | 1806  | 1441   | 688.5  | 28.62877 | 12.73127 | -1.16909 | Down | 4.11E-61 | 2.51E-60 |
| Zhx3         | 3621  | 796.5  | 380.5  | 7.878489 | 3.503985 | -1.16892 | Down | 1.54E-34 | 7.97E-34 |
| Dbnl         | 1750  | 3289.5 | 1569   | 67.23751 | 29.91103 | -1.16859 | Down | #####    | #####    |
| Mif4gd       | 1322  | 304    | 145    | 8.202494 | 3.649007 | -1.16856 | Down | 3.57E-14 | 1.45E-13 |
| Tns4         | 2498  | 81.5   | 39     | 1.169189 | 0.52017  | -1.16845 | Down | 0.000115 | 0.000213 |
| Herc2        | 15167 | 3841.5 | 1826.5 | 9.036698 | 4.021201 | -1.16817 | Down | #####    | #####    |
| LOC100363675 | 1993  | 1056.5 | 503.5  | 18.90573 | 8.4132   | -1.1681  | Down | 1.76E-45 | 9.80E-45 |
| Plekha8      | 6657  | 1261.5 | 599.5  | 6.767778 | 3.011739 | -1.16809 | Down | 2.76E-54 | 1.62E-53 |
| RGD1308350   | 3771  | 7834.5 | 3740.5 | 74.39075 | 33.11379 | -1.16769 | Down | 0        | 0        |
| Uchl1        | 1058  | 5027.5 | 2401   | 170.1938 | 75.76383 | -1.1676  | Down | #####    | #####    |
| Diras2       | 1201  | 304    | 145    | 9.0647   | 4.036127 | -1.16729 | Down | 3.57E-14 | 1.45E-13 |
| Comt         | 1669  | 4817   | 2304   | 103.4555 | 46.0646  | -1.16728 | Down | #####    | #####    |
| Map3k4       | 4908  | 2422.5 | 1156.5 | 17.64975 | 7.861898 | -1.1667  | Down | #####    | #####    |
| Ptbp3        | 2860  | 2032.5 | 968.5  | 25.3648  | 11.29985 | -1.16652 | Down | 7.71E-86 | 5.26E-85 |

|              |      |        |        |          |          |          |      |          |          |
|--------------|------|--------|--------|----------|----------|----------|------|----------|----------|
| Yap1         | 1471 | 2165.5 | 1038   | 52.80828 | 23.52856 | -1.16635 | Down | 4.48E-90 | 3.09E-89 |
| Rnf126       | 1450 | 1916   | 920.5  | 47.5039  | 21.17345 | -1.16579 | Down | 1.14E-79 | 7.60E-79 |
| Hdac4        | 4015 | 498.5  | 239    | 4.450466 | 1.984047 | -1.16551 | Down | 5.67E-22 | 2.60E-21 |
| Otud5        | 2632 | 2475   | 1185   | 33.71128 | 15.03373 | -1.16503 | Down | #####    | #####    |
| lftg3        | 2652 | 1727.5 | 827    | 23.294   | 10.392   | -1.16448 | Down | 2.04E-72 | 1.32E-71 |
| RGD1308234   | 3979 | 157    | 75     | 1.411616 | 0.629759 | -1.16448 | Down | 5.70E-08 | 1.28E-07 |
| Tram1        | 2778 | 7622.5 | 3634.5 | 98.00832 | 43.72567 | -1.16442 | Down | 0        | 0        |
| Spin1        | 1128 | 381    | 181.5  | 12.06501 | 5.38365  | -1.16417 | Down | 1.59E-17 | 6.92E-17 |
| B9d2         | 1037 | 409    | 196    | 14.12753 | 6.305125 | -1.16391 | Down | 2.24E-18 | 9.86E-18 |
| Rfng         | 1005 | 366.5  | 176.5  | 13.0844  | 5.840618 | -1.16365 | Down | 1.73E-16 | 7.43E-16 |
| Myg1         | 1207 | 1022.5 | 489.5  | 30.28805 | 13.52626 | -1.16299 | Down | 1.18E-43 | 6.50E-43 |
| Mark4        | 3217 | 1276   | 613.5  | 14.22774 | 6.355722 | -1.16258 | Down | 1.33E-53 | 7.77E-53 |
| Eme2         | 1614 | 353    | 169.5  | 7.836855 | 3.503726 | -1.16138 | Down | 4.25E-16 | 1.81E-15 |
| Stard4       | 5271 | 2098.5 | 1003.5 | 14.20795 | 6.352555 | -1.16129 | Down | 6.86E-88 | 4.70E-87 |
| Nedd8        | 795  | 3524   | 1686   | 158.2977 | 70.77807 | -1.16127 | Down | #####    | #####    |
| Oaf          | 1743 | 5080   | 2439   | 104.3931 | 46.68499 | -1.161   | Down | #####    | #####    |
| Sumf2        | 1466 | 1094.5 | 525.5  | 26.71362 | 11.9509  | -1.16046 | Down | 2.59E-46 | 1.45E-45 |
| Hmgcr        | 4319 | 8034   | 3845   | 66.39897 | 29.73332 | -1.15908 | Down | 0        | 0        |
| Pdzd8        | 7183 | 3902.5 | 1870.5 | 19.40726 | 8.694206 | -1.15847 | Down | #####    | #####    |
| Hdhd3        | 1204 | 132.5  | 63.5   | 3.922936 | 1.757485 | -1.15842 | Down | 6.37E-07 | 1.37E-06 |
| Arsb         | 1862 | 1387.5 | 667.5  | 26.70096 | 11.96361 | -1.15824 | Down | 5.51E-58 | 3.31E-57 |
| Aldh16a1     | 2591 | 931    | 447.5  | 12.85943 | 5.763044 | -1.15792 | Down | 1.26E-39 | 6.74E-39 |
| LOC100359512 | 731  | 831    | 399.5  | 40.70972 | 18.24443 | -1.15792 | Down | 1.50E-35 | 7.83E-35 |
| LOC100361417 | 3869 | 1055.5 | 506.5  | 9.743702 | 4.366909 | -1.15786 | Down | 8.88E-45 | 4.91E-44 |
| LOC100910875 | 1342 | 769    | 371    | 20.5846  | 9.227203 | -1.1576  | Down | 1.09E-32 | 5.55E-32 |

|              |      |        |        |          |          |          |      |          |          |
|--------------|------|--------|--------|----------|----------|----------|------|----------|----------|
| Wdr55        | 1650 | 497    | 239.5  | 10.7919  | 4.837691 | -1.15756 | Down | 7.69E-22 | 3.52E-21 |
| Snx17        | 1944 | 1650.5 | 794    | 30.3296  | 13.59842 | -1.15729 | Down | 1.54E-68 | 9.73E-68 |
| Dctd         | 2021 | 1568.5 | 755.5  | 27.82914 | 12.48238 | -1.1567  | Down | 3.88E-65 | 2.41E-64 |
| LOC100912332 | 1546 | 333    | 159.5  | 7.691194 | 3.450612 | -1.15636 | Down | 2.37E-15 | 9.99E-15 |
| Acaa2        | 1619 | 437    | 209.5  | 9.618222 | 4.315557 | -1.15622 | Down | 1.31E-19 | 5.85E-19 |
| Ctif         | 1430 | 372    | 179    | 9.314259 | 4.180447 | -1.15578 | Down | 1.03E-16 | 4.46E-16 |
| Ndufv1       | 1506 | 1956   | 940    | 46.45944 | 20.85697 | -1.15544 | Down | 3.81E-81 | 2.56E-80 |
| Tmem2        | 6474 | 2262   | 1086.5 | 12.50346 | 5.614477 | -1.1551  | Down | 9.58E-94 | 6.67E-93 |
| Fbxw5        | 2345 | 905.5  | 437.5  | 13.85148 | 6.220631 | -1.15491 | Down | 4.22E-38 | 2.24E-37 |
| RGD1563348   | 678  | 1992   | 958.5  | 105.0755 | 47.21078 | -1.15424 | Down | 1.79E-82 | 1.21E-81 |
| LOC100361644 | 315  | 1450.5 | 704.5  | 165.6462 | 74.45129 | -1.15374 | Down | 2.75E-59 | 1.66E-58 |
| Myl9         | 1008 | 381    | 184    | 13.56276 | 6.100668 | -1.15261 | Down | 5.92E-17 | 2.56E-16 |
| Psap         | 2585 | 20072  | 9656.5 | 277.3482 | 124.7621 | -1.15252 | Down | 0        | 0        |
| LOC100910289 | 1301 | 1559   | 750.5  | 42.74361 | 19.23025 | -1.15233 | Down | 6.72E-65 | 4.16E-64 |
| Reep4        | 1233 | 1336.5 | 645.5  | 38.86809 | 17.48851 | -1.15218 | Down | 1.91E-55 | 1.13E-54 |
| Ebp          | 1071 | 1040.5 | 501    | 34.72645 | 15.62716 | -1.15198 | Down | 9.41E-44 | 5.18E-43 |
| Srpx         | 1827 | 320.5  | 154    | 6.266102 | 2.820618 | -1.15156 | Down | 1.40E-14 | 5.77E-14 |
| Zfp598       | 3275 | 2594   | 1252.5 | 28.37577 | 12.7849  | -1.15022 | Down | #####    | #####    |
| Col5a1       | 5551 | 20496  | 9914   | 132.3277 | 59.6246  | -1.15014 | Down | 0        | 0        |
| Pcp4l1       | 1600 | 104    | 50.5   | 2.332361 | 1.05124  | -1.1497  | Down | 1.18E-05 | 2.36E-05 |
| Mttr6        | 3779 | 3420   | 1651   | 32.36809 | 14.59106 | -1.14949 | Down | #####    | #####    |
| Atp2a2       | 4471 | 20168  | 9736.5 | 161.2514 | 72.73114 | -1.14867 | Down | 0        | 0        |
| Myo9a        | 8575 | 1786.5 | 861.5  | 7.439266 | 3.355567 | -1.1486  | Down | 9.54E-74 | 6.20E-73 |
| Sfxn3        | 2699 | 3016.5 | 1458   | 39.99083 | 18.04056 | -1.14843 | Down | #####    | #####    |
| Zfp358       | 2031 | 891.5  | 433    | 15.78216 | 7.11969  | -1.14841 | Down | 5.05E-37 | 2.66E-36 |

|              |       |        |        |          |          |          |      |          |          |
|--------------|-------|--------|--------|----------|----------|----------|------|----------|----------|
| LOC100911280 | 4644  | 1111.5 | 538    | 8.563966 | 3.863545 | -1.14835 | Down | 4.24E-46 | 2.37E-45 |
| Slc46a1      | 1900  | 137.5  | 67     | 2.592141 | 1.169745 | -1.14795 | Down | 7.95E-07 | 1.70E-06 |
| Sufu         | 1757  | 447    | 217    | 9.118985 | 4.115787 | -1.1477  | Down | 2.04E-19 | 9.11E-19 |
| Spsb2        | 1257  | 177.5  | 86.5   | 5.062731 | 2.286403 | -1.14684 | Down | 1.54E-08 | 3.55E-08 |
| Pmepa1       | 693   | 12542  | 6101.5 | 651.1071 | 294.0656 | -1.14676 | Down | 0        | 0        |
| Cdk16        | 1791  | 5213   | 2528.5 | 104.3963 | 47.1502  | -1.14674 | Down | #####    | #####    |
| Elk4         | 10129 | 3048.5 | 1472.5 | 10.74963 | 4.855418 | -1.14662 | Down | #####    | #####    |
| LOC100912203 | 1038  | 1130   | 547    | 38.94704 | 17.59228 | -1.14657 | Down | 6.78E-47 | 3.81E-46 |
| Arhgap18     | 2292  | 943.5  | 456.5  | 14.71851 | 6.649489 | -1.14632 | Down | 1.65E-39 | 8.86E-39 |
| Mbrl         | 2100  | 2952   | 1433.5 | 50.45774 | 22.8074  | -1.14557 | Down | #####    | #####    |
| Srebf1       | 5011  | 407    | 197.5  | 2.90865  | 1.315255 | -1.14501 | Down | 6.34E-18 | 2.78E-17 |
| Gtf3a        | 1349  | 1671.5 | 811.5  | 44.34735 | 20.05437 | -1.14493 | Down | 4.20E-68 | 2.65E-67 |
| Hmga1        | 324   | 3933   | 1916   | 436.2554 | 197.3217 | -1.14462 | Down | #####    | #####    |
| Lrba         | 9352  | 1348   | 652.5  | 5.1529   | 2.331314 | -1.14424 | Down | 1.06E-55 | 6.26E-55 |
| Pitrm1       | 3178  | 5824.5 | 2829.5 | 65.68561 | 29.72065 | -1.14411 | Down | #####    | #####    |
| Ildr2        | 2162  | 1157.5 | 563    | 19.18867 | 8.683337 | -1.14393 | Down | 1.98E-47 | 1.11E-46 |
| Mpv17l2      | 1005  | 318    | 154.5  | 11.29507 | 5.114241 | -1.1431  | Down | 2.57E-14 | 1.05E-13 |
| Insr         | 5399  | 985.5  | 478    | 6.522144 | 2.956565 | -1.14142 | Down | 7.07E-41 | 3.82E-40 |
| Cdh18        | 3593  | 120.5  | 59     | 1.199998 | 0.54398  | -1.14141 | Down | 4.43E-06 | 9.09E-06 |
| Gpd2         | 2400  | 1088   | 527.5  | 16.20572 | 7.349956 | -1.1407  | Down | 3.73E-45 | 2.07E-44 |
| RGD1559938   | 1174  | 522    | 254    | 15.90262 | 7.212649 | -1.14066 | Down | 2.65E-22 | 1.22E-21 |
| Crtc1        | 1893  | 549    | 267.5  | 10.41618 | 4.726689 | -1.13992 | Down | 2.12E-23 | 9.85E-23 |
| Myo1b        | 3607  | 3645   | 1772.5 | 36.14749 | 16.40435 | -1.13982 | Down | #####    | #####    |
| Akap13       | 12224 | 4538   | 2201   | 13.25178 | 6.015386 | -1.13946 | Down | #####    | #####    |
| Gpc4         | 2669  | 3956   | 1922   | 52.99161 | 24.05667 | -1.13933 | Down | #####    | #####    |



|              |      |        |        |          |          |          |      |          |          |
|--------------|------|--------|--------|----------|----------|----------|------|----------|----------|
| Prkacb       | 1122 | 1226.5 | 596    | 39.06615 | 17.73729 | -1.13913 | Down | 2.92E-50 | 1.67E-49 |
| Arhgef11     | 4584 | 2193.5 | 1069   | 17.1558  | 7.790991 | -1.13882 | Down | 6.09E-88 | 4.17E-87 |
| Galnt1       | 1838 | 6777   | 3292   | 131.5741 | 59.75233 | -1.13881 | Down | #####    | #####    |
| Rerg         | 2261 | 92.5   | 45     | 1.462283 | 0.66409  | -1.13877 | Down | 5.37E-05 | 0.000102 |
| Cdk18        | 1522 | 179.5  | 87.5   | 4.217339 | 1.915569 | -1.13856 | Down | 1.30E-08 | 2.99E-08 |
| Mib2         | 3799 | 816    | 398    | 7.692945 | 3.494907 | -1.13828 | Down | 8.83E-34 | 4.54E-33 |
| Fuca1        | 1515 | 2379.5 | 1160.5 | 56.19814 | 25.5463  | -1.13741 | Down | 3.52E-95 | 2.46E-94 |
| Hebp2        | 2549 | 680.5  | 331    | 9.552846 | 4.342501 | -1.1374  | Down | 1.51E-28 | 7.39E-28 |
| Ndst4        | 2619 | 85     | 41.5   | 1.16332  | 0.528867 | -1.13727 | Down | 8.06E-05 | 0.000151 |
| P2ry2        | 2011 | 308.5  | 150.5  | 5.48923  | 2.495706 | -1.13716 | Down | 9.37E-14 | 3.64E-13 |
| Kirrel3      | 3640 | 240.5  | 117    | 2.361965 | 1.074384 | -1.13648 | Down | 5.17E-11 | 1.30E-10 |
| Ccdc88b      | 4919 | 51     | 25     | 0.371815 | 0.169134 | -1.13642 | Down | 0.002799 | 0.004582 |
| Plod3        | 2775 | 4057.5 | 1979.5 | 52.38567 | 23.83166 | -1.13629 | Down | #####    | #####    |
| Foxred1      | 2205 | 469.5  | 229    | 7.610439 | 3.463301 | -1.13583 | Down | 4.74E-20 | 2.13E-19 |
| Card10       | 3124 | 67     | 33     | 0.77166  | 0.351237 | -1.13552 | Down | 0.000641 | 0.001107 |
| Map3k11      | 3536 | 1761   | 861    | 17.86732 | 8.13361  | -1.13536 | Down | 1.65E-70 | 1.05E-69 |
| Lgals3       | 948  | 4456.5 | 2183.5 | 168.5845 | 76.75786 | -1.13509 | Down | #####    | #####    |
| Bloc1s3      | 1750 | 108    | 53     | 2.210303 | 1.006515 | -1.13488 | Down | 1.29E-05 | 2.57E-05 |
| Mfsd5        | 1761 | 1703.5 | 832.5  | 34.63487 | 15.77596 | -1.1345  | Down | 2.30E-68 | 1.45E-67 |
| Gaa          | 3408 | 2608   | 1277   | 27.44483 | 12.50366 | -1.13418 | Down | #####    | #####    |
| LOC100909679 | 1297 | 174    | 85.5   | 4.830591 | 2.201251 | -1.13388 | Down | 2.49E-08 | 5.68E-08 |
| RT1-CI       | 1107 | 931    | 455.5  | 30.15835 | 13.74548 | -1.1336  | Down | 3.88E-38 | 2.06E-37 |
| Rgs10        | 858  | 467    | 229    | 19.45771 | 8.870022 | -1.13333 | Down | 8.61E-20 | 3.86E-19 |
| Brf1         | 2380 | 933    | 455.5  | 14.02956 | 6.396405 | -1.13314 | Down | 2.14E-38 | 1.14E-37 |
| Kntc1        | 6479 | 4339   | 2115   | 23.91286 | 10.90266 | -1.13311 | Down | #####    | #####    |

|              |      |        |        |          |          |          |      |          |          |
|--------------|------|--------|--------|----------|----------|----------|------|----------|----------|
| Arhgap21     | 6640 | 5819   | 2846.5 | 31.38223 | 14.30913 | -1.13301 | Down | #####    | #####    |
| Limd1        | 3937 | 3081.5 | 1506.5 | 28.02096 | 12.77861 | -1.13278 | Down | #####    | #####    |
| LOC100912343 | 644  | 51.5   | 25     | 2.847746 | 1.298867 | -1.13257 | Down | 0.002799 | 0.004582 |
| Ybx1         | 1536 | 10897  | 5339   | 253.8576 | 115.8627 | -1.1316  | Down | 0        | 0        |
| Otud4        | 3832 | 1935   | 945.5  | 18.04749 | 8.238147 | -1.13141 | Down | 1.72E-77 | 1.14E-76 |
| Hnrnpab      | 1592 | 5874   | 2875   | 131.9321 | 60.22612 | -1.13133 | Down | #####    | #####    |
| RT1-CE2      | 1098 | 119.5  | 58.5   | 3.912981 | 1.786593 | -1.13106 | Down | 3.90E-06 | 8.02E-06 |
| RGD1308428   | 6155 | 1809.5 | 886    | 10.52364 | 4.808012 | -1.13012 | Down | 4.22E-72 | 2.72E-71 |
| Ftsj1        | 1185 | 399    | 196    | 12.07515 | 5.51689  | -1.13011 | Down | 4.54E-17 | 1.97E-16 |
| Dym          | 2516 | 952    | 466    | 13.54986 | 6.191596 | -1.12989 | Down | 7.98E-39 | 4.26E-38 |
| RGD1307155   | 1246 | 132    | 64.5   | 3.79038  | 1.732263 | -1.12968 | Down | 9.93E-07 | 2.11E-06 |
| Bub1b        | 3617 | 2963   | 1448.5 | 29.2618  | 13.37527 | -1.12945 | Down | #####    | #####    |
| Pdia6        | 1744 | 16644  | 8131.5 | 340.8882 | 155.8504 | -1.12914 | Down | 0        | 0        |
| Smarcd1      | 3068 | 2523   | 1239.5 | 29.47809 | 13.47846 | -1.12899 | Down | 3.20E-99 | 2.27E-98 |
| Nr2c2        | 2508 | 949    | 465.5  | 13.5473  | 6.198051 | -1.12812 | Down | 1.27E-38 | 6.78E-38 |
| LOC100909609 | 883  | 271.5  | 132.5  | 10.96704 | 5.018576 | -1.12782 | Down | 2.84E-12 | 8.27E-12 |
| Fblim1       | 1475 | 46     | 23     | 1.12295  | 0.513896 | -1.12775 | Down | 0.005583 | 0.008934 |
| Gnao1        | 2068 | 707.5  | 348    | 12.26524 | 5.614367 | -1.12738 | Down | 6.57E-29 | 3.23E-28 |
| Sec14l1      | 2946 | 3347.5 | 1645   | 40.6675  | 18.61945 | -1.12707 | Down | #####    | #####    |
| RGD1566084   | 3412 | 230.5  | 113    | 2.423159 | 1.109675 | -1.12675 | Down | 1.89E-10 | 4.65E-10 |
| LOC100911504 | 912  | 203    | 100.5  | 7.993203 | 3.664829 | -1.12503 | Down | 2.45E-09 | 5.81E-09 |
| Fam60a       | 2617 | 888.5  | 437    | 12.12327 | 5.558936 | -1.1249  | Down | 6.66E-36 | 3.47E-35 |
| Pycr2        | 1582 | 1077.5 | 530    | 24.37286 | 11.17953 | -1.12442 | Down | 3.48E-43 | 1.91E-42 |
| LOC100910255 | 5963 | 9660.5 | 4744.5 | 57.93816 | 26.58036 | -1.12415 | Down | 0        | 0        |
| Mospd3       | 1037 | 1556   | 770.5  | 53.91716 | 24.73682 | -1.12408 | Down | 7.73E-61 | 4.71E-60 |

|              |      |         |         |          |          |          |      |          |          |
|--------------|------|---------|---------|----------|----------|----------|------|----------|----------|
| Impdh2       | 1677 | 5774    | 2841.5  | 123.3133 | 56.58251 | -1.1239  | Down | #####    | #####    |
| LOC100361060 | 321  | 1456.5  | 722     | 163.1634 | 74.89806 | -1.12332 | Down | 8.91E-57 | 5.30E-56 |
| Hspa5        | 2580 | 30469.5 | 14982.5 | 422.1647 | 193.8322 | -1.123   | Down | 0        | 0        |
| LOC100361083 | 4534 | 2070.5  | 1018    | 16.30001 | 7.484489 | -1.1229  | Down | 1.77E-81 | 1.19E-80 |
| LOC679346    | 4503 | 530     | 260.5   | 4.200965 | 1.929339 | -1.12261 | Down | 3.12E-22 | 1.44E-21 |
| Pxdn         | 6563 | 9045.5  | 4455.5  | 49.33924 | 22.6707  | -1.12191 | Down | 0        | 0        |
| C1s          | 2908 | 1624    | 798.5   | 19.93616 | 9.163418 | -1.12143 | Down | 1.94E-64 | 1.20E-63 |
| Cers5        | 2655 | 3402    | 1676    | 45.80613 | 21.06667 | -1.12058 | Down | #####    | #####    |
| Plekhg4      | 3561 | 1350.5  | 665.5   | 13.58447 | 6.247985 | -1.1205  | Down | 1.43E-53 | 8.36E-53 |
| B3galt6      | 2137 | 207.5   | 102.5   | 3.469006 | 1.595694 | -1.12034 | Down | 1.73E-09 | 4.12E-09 |
| Crip2        | 1154 | 5432    | 2687    | 168.749  | 77.63177 | -1.12016 | Down | #####    | #####    |
| Mex3b        | 3401 | 556.5   | 275.5   | 5.856753 | 2.697241 | -1.11862 | Down | 7.76E-23 | 3.59E-22 |
| Clasp2       | 5570 | 2998.5  | 1476    | 19.20035 | 8.845428 | -1.11813 | Down | #####    | #####    |
| LOC100364016 | 1275 | 1262.5  | 625     | 35.50055 | 16.35479 | -1.11813 | Down | 1.37E-49 | 7.80E-49 |
| LOC680083    | 902  | 568     | 281     | 22.53821 | 10.38802 | -1.11745 | Down | 2.77E-23 | 1.29E-22 |
| Scfd2        | 2360 | 1371    | 677.5   | 20.74705 | 9.56454  | -1.11714 | Down | 4.45E-54 | 2.61E-53 |
| Wsb2         | 1575 | 5942    | 2937    | 135.0474 | 62.26646 | -1.11694 | Down | #####    | #####    |
| Pak4         | 2857 | 1980    | 982     | 24.86044 | 11.46333 | -1.11682 | Down | 1.57E-76 | 1.03E-75 |
| Ints3        | 3774 | 3911    | 1932    | 37.09846 | 17.107   | -1.11677 | Down | #####    | #####    |
| Sh2b3        | 3680 | 2995    | 1480    | 29.13075 | 13.43342 | -1.11672 | Down | #####    | #####    |
| Set          | 1519 | 9962    | 4920    | 234.5603 | 108.2237 | -1.11594 | Down | 0        | 0        |
| Parp12       | 3444 | 1403.5  | 694     | 14.58431 | 6.72934  | -1.11588 | Down | 4.40E-55 | 2.59E-54 |
| Dak          | 2403 | 518.5   | 255.5   | 7.714694 | 3.560542 | -1.11551 | Down | 1.33E-21 | 6.09E-21 |
| Fzd4         | 6867 | 294.5   | 146.5   | 1.536321 | 0.709191 | -1.11523 | Down | 1.12E-12 | 3.49E-12 |
| Tmem147      | 881  | 891     | 438.5   | 36.11194 | 16.67023 | -1.1152  | Down | 4.18E-36 | 2.18E-35 |

|            |      |        |        |          |          |          |      |          |          |
|------------|------|--------|--------|----------|----------|----------|------|----------|----------|
| Ftsjd2     | 3748 | 3114.5 | 1542   | 29.75071 | 13.73646 | -1.11491 | Down | #####    | #####    |
| Extl2      | 2016 | 551    | 271    | 9.740787 | 4.498724 | -1.11452 | Down | 6.36E-23 | 2.95E-22 |
| Fam89a     | 1407 | 238.5  | 118.5  | 6.072734 | 2.805179 | -1.11425 | Down | 1.44E-10 | 3.55E-10 |
| Oplah      | 4003 | 445    | 221    | 3.982056 | 1.839866 | -1.11391 | Down | 2.00E-18 | 8.82E-18 |
| Cln5       | 2549 | 1277.5 | 632.5  | 17.92237 | 8.281133 | -1.11386 | Down | 3.09E-50 | 1.77E-49 |
| Cdk4       | 1395 | 6787   | 3363   | 174.1164 | 80.45315 | -1.11383 | Down | #####    | #####    |
| Trap1      | 2264 | 2571.5 | 1274.5 | 40.66173 | 18.78867 | -1.11381 | Down | 5.18E-99 | 3.67E-98 |
| Ap2a1      | 2934 | 4624.5 | 2297   | 56.51882 | 26.12072 | -1.11354 | Down | #####    | #####    |
| Trerf1     | 3861 | 1299   | 645.5  | 12.07    | 5.578383 | -1.11351 | Down | 1.08E-50 | 6.20E-50 |
| Aldh3b1    | 1913 | 204    | 101.5  | 3.818578 | 1.765557 | -1.11291 | Down | 2.77E-09 | 6.57E-09 |
| Gemin5     | 5012 | 1668.5 | 826.5  | 11.89986 | 5.502304 | -1.11284 | Down | 5.53E-65 | 3.42E-64 |
| Ate1       | 4531 | 3764.5 | 1863.5 | 29.65272 | 13.71566 | -1.11234 | Down | #####    | #####    |
| Tspan3     | 1644 | 4274.5 | 2115.5 | 92.7789  | 42.9159  | -1.11228 | Down | #####    | #####    |
| RGD1311946 | 2091 | 1051   | 521.5  | 18.0255  | 8.339442 | -1.11202 | Down | 1.69E-41 | 9.16E-41 |
| Flt1       | 4734 | 1337   | 663    | 10.1062  | 4.675656 | -1.112   | Down | 2.80E-52 | 1.62E-51 |
| Nid2       | 4782 | 14544  | 7227.5 | 109.0115 | 50.46383 | -1.11116 | Down | 0        | 0        |
| Aldh5a1    | 3504 | 242    | 120    | 2.470349 | 1.144155 | -1.11043 | Down | 1.02E-10 | 2.52E-10 |
| Gcsh       | 1273 | 1752   | 868.5  | 49.09176 | 22.74022 | -1.11024 | Down | 4.30E-68 | 2.72E-67 |
| Ankrd11    | 8653 | 5800.5 | 2879.5 | 24.00499 | 11.12272 | -1.10983 | Down | #####    | #####    |
| M6pr       | 2282 | 3237   | 1605.5 | 50.71051 | 23.49894 | -1.10969 | Down | #####    | #####    |
| Psme2      | 1366 | 2052.5 | 1021   | 53.80327 | 24.93612 | -1.10946 | Down | 1.17E-78 | 7.78E-78 |
| Hpcal1     | 1721 | 2936.5 | 1460.5 | 61.1785  | 28.36955 | -1.10868 | Down | #####    | #####    |
| Eif2c2     | 2626 | 1511   | 752    | 20.62024 | 9.564312 | -1.10833 | Down | 2.29E-58 | 1.38E-57 |
| Mdh2       | 1324 | 8905   | 4426   | 240.8422 | 111.7128 | -1.10829 | Down | 0        | 0        |
| Map1s      | 3189 | 1800   | 898    | 20.24425 | 9.393589 | -1.10776 | Down | 8.44E-69 | 5.35E-68 |

|              |      |        |        |          |          |          |      |          |          |
|--------------|------|--------|--------|----------|----------|----------|------|----------|----------|
| Lsm4         | 911  | 2126.5 | 1060   | 83.74568 | 38.86127 | -1.10768 | Down | 4.86E-81 | 3.26E-80 |
| LOC100910838 | 2579 | 103.5  | 51.5   | 1.438604 | 0.667573 | -1.10767 | Down | 2.49E-05 | 4.89E-05 |
| Tle3         | 4776 | 4390   | 2188   | 32.95304 | 15.29304 | -1.10754 | Down | #####    | #####    |
| 2-Mar        | 1329 | 711.5  | 354    | 19.14867 | 8.888361 | -1.10726 | Down | 2.45E-28 | 1.20E-27 |
| Ndufb9       | 669  | 2537   | 1263.5 | 135.7487 | 63.02404 | -1.10696 | Down | 1.10E-96 | 7.74E-96 |
| LOC688018    | 9194 | 14009  | 6956.5 | 54.42994 | 25.27019 | -1.10696 | Down | 0        | 0        |
| LOC100909835 | 846  | 73.5   | 36.5   | 3.105777 | 1.442043 | -1.10684 | Down | 0.000371 | 0.000662 |
| Fam69b       | 1560 | 254    | 126    | 5.821833 | 2.705858 | -1.10539 | Down | 3.58E-11 | 9.03E-11 |
| LOC288777    | 481  | 404    | 203.5  | 30.25642 | 14.06625 | -1.105   | Down | 1.91E-16 | 8.19E-16 |
| Nipsnap3b    | 1140 | 805.5  | 400    | 25.20395 | 11.71941 | -1.10475 | Down | 5.21E-32 | 2.63E-31 |
| Pogk         | 6927 | 2557   | 1274.5 | 13.2     | 6.137843 | -1.10473 | Down | 3.02E-97 | 2.13E-96 |
| B4galt1      | 2298 | 1233.5 | 614.5  | 19.16411 | 8.911986 | -1.10459 | Down | 6.86E-48 | 3.87E-47 |
| Lbr          | 1863 | 1783.5 | 888.5  | 34.21054 | 15.90952 | -1.10455 | Down | 1.95E-68 | 1.23E-67 |
| Impa2        | 1341 | 184.5  | 92.5   | 4.926831 | 2.291223 | -1.10454 | Down | 2.42E-08 | 5.52E-08 |
| Rrm1         | 3038 | 8331   | 4142   | 97.89965 | 45.53814 | -1.10423 | Down | 0        | 0        |
| Suds3        | 2255 | 2747   | 1371.5 | 43.63448 | 20.29741 | -1.10417 | Down | #####    | #####    |
| Dtwd2        | 1804 | 160    | 80     | 3.165415 | 1.472586 | -1.10404 | Down | 1.99E-07 | 4.37E-07 |
| Rtkn         | 2588 | 1474   | 737    | 20.43447 | 9.511237 | -1.1033  | Down | 2.24E-56 | 1.33E-55 |
| Cdca7l       | 2599 | 1009   | 502.5  | 13.87721 | 6.460148 | -1.10308 | Down | 1.39E-39 | 7.45E-39 |
| Ptn          | 1370 | 3369.5 | 1678   | 87.77386 | 40.86976 | -1.10276 | Down | #####    | #####    |
| Phka1        | 3729 | 372    | 186    | 3.564459 | 1.660967 | -1.10166 | Down | 2.00E-15 | 8.45E-15 |
| Ppp5c        | 1973 | 2491.5 | 1244   | 45.18626 | 21.06127 | -1.10129 | Down | 2.83E-94 | 1.97E-93 |
| LOC681996    | 1391 | 4819.5 | 2413.5 | 124.2028 | 57.90009 | -1.10106 | Down | #####    | #####    |
| Dock9        | 9363 | 1338   | 668    | 5.107955 | 2.381778 | -1.10071 | Down | 1.63E-51 | 9.39E-51 |
| Actr5        | 2622 | 403    | 201.5  | 5.498333 | 2.564223 | -1.10047 | Down | 1.12E-16 | 4.85E-16 |

|              |      |        |        |          |          |          |      |          |          |
|--------------|------|--------|--------|----------|----------|----------|------|----------|----------|
| Pds5a        | 4030 | 4647.5 | 2318.5 | 41.18454 | 19.21034 | -1.10022 | Down | #####    | #####    |
| LOC100362311 | 4356 | 755.5  | 377.5  | 6.221147 | 2.902978 | -1.09965 | Down | 8.54E-30 | 4.24E-29 |
| Trim2        | 6918 | 3327   | 1659.5 | 17.18158 | 8.017659 | -1.09961 | Down | #####    | #####    |
| Bok          | 1383 | 1458   | 730.5  | 37.71671 | 17.61375 | -1.0985  | Down | 1.32E-55 | 7.78E-55 |
| Adamtsl5     | 1051 | 256.5  | 129.5  | 8.760023 | 4.091095 | -1.09845 | Down | 6.87E-11 | 1.72E-10 |
| Ldlrad3      | 2258 | 103.5  | 52     | 1.647943 | 0.76967  | -1.09835 | Down | 3.81E-05 | 7.37E-05 |
| Hn1l         | 2747 | 3897.5 | 1942   | 50.55028 | 23.61044 | -1.09829 | Down | #####    | #####    |
| Rnaseh2a     | 1720 | 1059.5 | 530.5  | 22.00622 | 10.28939 | -1.09675 | Down | 6.61E-41 | 3.57E-40 |
| Fbxl6        | 1726 | 529    | 266    | 10.98478 | 5.137017 | -1.0965  | Down | 5.00E-21 | 2.28E-20 |
| Ubash3b      | 2585 | 917    | 459.5  | 12.70834 | 5.944291 | -1.0962  | Down | 1.23E-35 | 6.41E-35 |
| Arvcf        | 3887 | 771.5  | 387    | 7.106832 | 3.325005 | -1.09585 | Down | 4.90E-30 | 2.44E-29 |
| Glce         | 4869 | 2604.5 | 1303   | 19.09051 | 8.931919 | -1.09581 | Down | 5.18E-98 | 3.66E-97 |
| Sgpl1        | 2033 | 1163.5 | 582    | 20.43908 | 9.564498 | -1.09557 | Down | 9.19E-45 | 5.08E-44 |
| Hlcs         | 2172 | 401.5  | 201    | 6.622679 | 3.099194 | -1.09552 | Down | 2.01E-16 | 8.64E-16 |
| Cd2bp2       | 3004 | 2343.5 | 1174.5 | 27.86477 | 13.0399  | -1.09551 | Down | 4.27E-88 | 2.93E-87 |
| Dip2b        | 5317 | 874    | 438.5  | 5.885011 | 2.754724 | -1.09514 | Down | 5.96E-34 | 3.07E-33 |
| Slc27a4      | 3067 | 1346   | 675.5  | 15.713   | 7.35616  | -1.09493 | Down | 2.78E-51 | 1.60E-50 |
| Rab3il1      | 1134 | 128.5  | 64.5   | 4.070225 | 1.905732 | -1.09476 | Down | 3.34E-06 | 6.90E-06 |
| Acbd4        | 1816 | 373    | 187.5  | 7.359539 | 3.448391 | -1.09369 | Down | 2.25E-15 | 9.51E-15 |
| Sema3b       | 2542 | 186    | 94     | 2.623248 | 1.229646 | -1.09311 | Down | 3.07E-08 | 6.98E-08 |
| Atp6v0a2     | 2571 | 1203.5 | 607    | 16.78123 | 7.866353 | -1.09308 | Down | 2.28E-45 | 1.26E-44 |
| LOC498205    | 2114 | 381    | 192    | 6.465111 | 3.03059  | -1.09308 | Down | 1.70E-15 | 7.18E-15 |
| Pnkd         | 2902 | 950.5  | 478.5  | 11.7434  | 5.508594 | -1.09209 | Down | 2.02E-36 | 1.06E-35 |
| LOC361914    | 1784 | 154    | 78     | 3.089876 | 1.449647 | -1.09185 | Down | 5.09E-07 | 1.10E-06 |
| Hk1          | 3653 | 8431   | 4242.5 | 82.69056 | 38.80846 | -1.09135 | Down | 0        | 0        |

|              |      |        |        |          |          |          |      |          |          |
|--------------|------|--------|--------|----------|----------|----------|------|----------|----------|
| Edem1        | 5686 | 8009   | 4023   | 50.29104 | 23.60815 | -1.09102 | Down | #####    | #####    |
| Ras110a      | 974  | 116.5  | 58.5   | 4.278556 | 2.0085   | -1.09101 | Down | 9.69E-06 | 1.94E-05 |
| Aco2         | 3287 | 8699   | 4385.5 | 94.82631 | 44.54795 | -1.08993 | Down | 0        | 0        |
| Add3         | 4194 | 4233   | 2130.5 | 36.08084 | 16.9514  | -1.08983 | Down | #####    | #####    |
| Tsta3        | 1354 | 653.5  | 329.5  | 17.26358 | 8.112484 | -1.08952 | Down | 1.80E-25 | 8.57E-25 |
| Usp42        | 5749 | 792.5  | 398.5  | 4.935364 | 2.320594 | -1.08866 | Down | 9.95E-31 | 4.97E-30 |
| Slc25a38     | 1686 | 327    | 165    | 6.939824 | 3.264723 | -1.08794 | Down | 1.80E-13 | 6.61E-13 |
| Ube2m        | 1963 | 5421.5 | 2748.5 | 99.22485 | 46.69139 | -1.08754 | Down | #####    | #####    |
| Pus7l        | 2795 | 177    | 88.5   | 2.258467 | 1.062785 | -1.08749 | Down | 3.62E-08 | 8.23E-08 |
| Capn12       | 2932 | 944    | 473    | 11.45404 | 5.390369 | -1.0874  | Down | 1.50E-36 | 7.87E-36 |
| Glr5         | 2149 | 714    | 360    | 11.86568 | 5.587088 | -1.08663 | Down | 1.18E-27 | 5.76E-27 |
| LOC100363271 | 954  | 17645  | 8913   | 662.0399 | 311.7771 | -1.0864  | Down | 0        | 0        |
| Ptger1       | 2216 | 705    | 357    | 11.40921 | 5.37459  | -1.08597 | Down | 4.67E-27 | 2.26E-26 |
| Fam126a      | 1798 | 1011.5 | 510.5  | 20.11668 | 9.478152 | -1.08571 | Down | 2.01E-38 | 1.07E-37 |
| Nucks1       | 1783 | 7391.5 | 3732.5 | 148.2706 | 69.87091 | -1.08547 | Down | #####    | #####    |
| LOC687713    | 2819 | 1458.5 | 738.5  | 18.55215 | 8.743707 | -1.08527 | Down | 3.29E-54 | 1.93E-53 |
| Myh1         | 6031 | 782    | 395    | 4.638064 | 2.18607  | -1.08518 | Down | 5.24E-30 | 2.61E-29 |
| LOC685772    | 1180 | 889.5  | 450.5  | 27.0096  | 12.73077 | -1.08515 | Down | 1.01E-33 | 5.20E-33 |
| Prkar2b      | 3182 | 2133.5 | 1078.5 | 23.97077 | 11.30233 | -1.08466 | Down | 9.33E-79 | 6.20E-78 |
| Samd4b       | 4298 | 4795.5 | 2433   | 40.0416  | 18.88297 | -1.08441 | Down | #####    | #####    |
| Prmt1        | 1201 | 3550   | 1791   | 105.4851 | 49.7591  | -1.08401 | Down | #####    | #####    |
| B4galt4      | 2106 | 60.5   | 30.5   | 1.028097 | 0.485018 | -1.08387 | Down | 0.001517 | 0.002543 |
| Spns2        | 3871 | 431    | 217    | 3.963244 | 1.869733 | -1.08385 | Down | 2.28E-17 | 9.93E-17 |
| Arrdc1       | 1597 | 679.5  | 344.5  | 15.24589 | 7.195621 | -1.08323 | Down | 4.33E-26 | 2.08E-25 |
| Fam213b      | 807  | 104    | 52.5   | 4.592284 | 2.168101 | -1.08278 | Down | 2.82E-05 | 5.50E-05 |

|            |       |        |        |          |          |          |      |          |          |
|------------|-------|--------|--------|----------|----------|----------|------|----------|----------|
| Cenpa      | 1300  | 1563.5 | 791    | 43.00865 | 20.30559 | -1.08275 | Down | 5.20E-58 | 3.12E-57 |
| Skiv2l     | 3912  | 2097.5 | 1064   | 19.21473 | 9.073304 | -1.08251 | Down | 9.83E-77 | 6.46E-76 |
| Pcdhgb2    | 2740  | 67.5   | 34.5   | 0.883509 | 0.417261 | -1.0823  | Down | 0.000987 | 0.001673 |
| Vcp        | 3214  | 13868  | 6995.5 | 153.7813 | 72.63531 | -1.08214 | Down | 0        | 0        |
| Fam100a    | 1343  | 689    | 350.5  | 18.44115 | 8.711041 | -1.08201 | Down | 2.74E-26 | 1.32E-25 |
| Elov15     | 900   | 2389.5 | 1211   | 95.09719 | 44.92581 | -1.08186 | Down | 2.33E-87 | 1.59E-86 |
| LOC691920  | 12900 | 713.5  | 361    | 1.976217 | 0.933615 | -1.08184 | Down | 2.35E-27 | 1.14E-26 |
| Arhgap39   | 4612  | 553.5  | 281    | 4.30496  | 2.034192 | -1.08154 | Down | 2.13E-21 | 9.71E-21 |
| RGD1561963 | 7284  | 1827.5 | 926.5  | 8.98329  | 4.246133 | -1.08109 | Down | 2.91E-67 | 1.83E-66 |
| Nfatc3     | 5953  | 3093.5 | 1566   | 18.5725  | 8.78321  | -1.08035 | Down | #####    | #####    |
| Sp110      | 1783  | 771    | 391    | 15.48583 | 7.324534 | -1.08014 | Down | 2.45E-29 | 1.21E-28 |
| Klc1       | 1917  | 5528.5 | 2810   | 103.4108 | 48.9235  | -1.07979 | Down | #####    | #####    |
| RGD1304952 | 2456  | 57     | 29     | 0.833976 | 0.394592 | -1.07965 | Down | 0.002479 | 0.00408  |
| Casc4      | 1628  | 1602   | 810    | 35.09059 | 16.60529 | -1.07944 | Down | 1.53E-59 | 9.27E-59 |
| Abhd16a    | 2022  | 1511   | 767    | 26.76533 | 12.66631 | -1.07937 | Down | 9.69E-56 | 5.74E-55 |
| Ahcy12     | 5020  | 1500   | 760.5  | 10.67518 | 5.052972 | -1.07906 | Down | 1.36E-55 | 8.06E-55 |
| Tsku       | 2600  | 5385   | 2732   | 74.20014 | 35.12234 | -1.07903 | Down | #####    | #####    |
| Sms        | 1675  | 2037.5 | 1031   | 43.42346 | 20.55893 | -1.07871 | Down | 4.94E-75 | 3.23E-74 |
| Ctnnbip1   | 2565  | 1066   | 541    | 14.86081 | 7.036205 | -1.07864 | Down | 7.42E-40 | 3.98E-39 |
| Ephb2      | 2970  | 148    | 76     | 1.787385 | 0.846464 | -1.07833 | Down | 1.29E-06 | 2.74E-06 |
| Efnb1      | 3275  | 5573   | 2837   | 61.00015 | 28.91477 | -1.07701 | Down | #####    | #####    |
| Plcb1      | 5217  | 1233.5 | 627.5  | 8.450699 | 4.006876 | -1.07659 | Down | 1.29E-45 | 7.18E-45 |
| Fut11      | 1534  | 398    | 204    | 9.292644 | 4.411804 | -1.07472 | Down | 1.59E-15 | 6.72E-15 |
| Ifi44      | 2922  | 229.5  | 116.5  | 2.800383 | 1.329744 | -1.07448 | Down | 8.81E-10 | 2.12E-09 |
| Gstm2      | 657   | 66     | 33.5   | 3.607755 | 1.714016 | -1.07372 | Down | 0.000874 | 0.001492 |



|              |      |        |        |          |          |          |      |          |          |
|--------------|------|--------|--------|----------|----------|----------|------|----------|----------|
| Prep         | 2743 | 3675.5 | 1870   | 47.91546 | 22.77016 | -1.07335 | Down | #####    | #####    |
| Rbm9         | 1971 | 1679.5 | 857.5  | 30.58084 | 14.53412 | -1.07318 | Down | 6.27E-61 | 3.82E-60 |
| LOC688430    | 547  | 51     | 26     | 3.306926 | 1.572133 | -1.07277 | Down | 0.004335 | 0.006983 |
| Lypla2       | 1536 | 2007.5 | 1026   | 46.84345 | 22.26971 | -1.07276 | Down | 3.31E-72 | 2.13E-71 |
| Cd97         | 3046 | 510.5  | 260    | 5.998193 | 2.851895 | -1.07261 | Down | 1.04E-19 | 4.66E-19 |
| C2cd2l       | 3367 | 899.5  | 459.5  | 9.581609 | 4.558358 | -1.07175 | Down | 2.11E-33 | 1.08E-32 |
| Nfe2l1       | 1358 | 2136.5 | 1093.5 | 56.46368 | 26.87439 | -1.07109 | Down | 1.50E-76 | 9.84E-76 |
| Zbtb7c       | 4065 | 486.5  | 249    | 4.295593 | 2.044875 | -1.07084 | Down | 1.21E-18 | 5.37E-18 |
| Ctps2        | 3272 | 1312   | 666.5  | 14.30763 | 6.814169 | -1.07018 | Down | 1.25E-48 | 7.09E-48 |
| LOC680257    | 842  | 1475   | 756    | 62.86216 | 29.94255 | -1.06999 | Down | 3.28E-53 | 1.91E-52 |
| Npr2         | 3469 | 1001   | 511    | 10.32248 | 4.917256 | -1.06986 | Down | 5.13E-37 | 2.71E-36 |
| Dalrd3       | 1761 | 430.5  | 220.5  | 8.756645 | 4.171517 | -1.06981 | Down | 1.01E-16 | 4.36E-16 |
| Cacnb3       | 2520 | 1598.5 | 818    | 22.72609 | 10.83211 | -1.06904 | Down | 1.12E-57 | 6.71E-57 |
| Nrl          | 717  | 139.5  | 71.5   | 6.972007 | 3.32372  | -1.06878 | Down | 2.34E-06 | 4.88E-06 |
| Rangap1      | 2783 | 5814   | 2967.5 | 74.68535 | 35.61524 | -1.06833 | Down | #####    | #####    |
| Gatad1       | 2477 | 3546.5 | 1811   | 51.16573 | 24.40089 | -1.06824 | Down | #####    | #####    |
| Lnpep        | 3137 | 988.5  | 506    | 11.25929 | 5.370107 | -1.06809 | Down | 2.81E-36 | 1.47E-35 |
| LOC100910506 | 3005 | 572.5  | 292.5  | 6.804582 | 3.245455 | -1.06809 | Down | 7.56E-22 | 3.46E-21 |
| Dennd2a      | 4424 | 1508   | 771.5  | 12.19166 | 5.818756 | -1.06711 | Down | 1.10E-54 | 6.44E-54 |
| Chrna7       | 1509 | 409    | 208.5  | 9.704403 | 4.631876 | -1.06704 | Down | 3.39E-16 | 1.45E-15 |
| RGD1563634   | 2595 | 965.5  | 494    | 13.33578 | 6.366815 | -1.06666 | Down | 1.65E-35 | 8.56E-35 |
| Arhgef18     | 6131 | 1716   | 881    | 10.03516 | 4.791238 | -1.06659 | Down | 2.31E-61 | 1.41E-60 |
| Dnm2         | 3463 | 3846.5 | 1973   | 39.84472 | 19.02587 | -1.06643 | Down | #####    | #####    |
| Pqlc3        | 1929 | 3026   | 1546.5 | 56.01978 | 26.75887 | -1.06592 | Down | #####    | #####    |
| LOC100912079 | 3118 | 587.5  | 300.5  | 6.726994 | 3.214075 | -1.06556 | Down | 2.54E-22 | 1.17E-21 |

|            |       |         |        |          |          |          |      |          |          |
|------------|-------|---------|--------|----------|----------|----------|------|----------|----------|
| Pde3b      | 4381  | 135.5   | 69     | 1.102355 | 0.526864 | -1.06509 | Down | 3.33E-06 | 6.89E-06 |
| LOC683626  | 2634  | 3661    | 1874   | 49.70991 | 23.75903 | -1.06506 | Down | #####    | #####    |
| E2f7       | 3369  | 677     | 348    | 7.193869 | 3.438798 | -1.06486 | Down | 3.70E-25 | 1.75E-24 |
| Ascc1      | 1508  | 1102.5  | 565    | 26.14233 | 12.50003 | -1.06446 | Down | 3.65E-40 | 1.96E-39 |
| Polr3d     | 1921  | 1885.5  | 969    | 35.19495 | 16.83083 | -1.06426 | Down | 5.09E-67 | 3.19E-66 |
| Canx       | 4986  | 29303.5 | 14973  | 209.6921 | 100.2833 | -1.06419 | Down | 0        | 0        |
| Med14      | 4901  | 5479    | 2810   | 40.02217 | 19.14076 | -1.06415 | Down | #####    | #####    |
| LOC681173  | 675   | 181     | 92.5   | 9.570571 | 4.57723  | -1.06413 | Down | 5.82E-08 | 1.31E-07 |
| Cers4      | 3342  | 1847.5  | 945    | 19.76041 | 9.454889 | -1.06348 | Down | 1.84E-66 | 1.15E-65 |
| Slc25a4    | 1289  | 14611.5 | 7502   | 405.9665 | 194.3208 | -1.06292 | Down | 0        | 0        |
| Als2cl     | 4090  | 87      | 45     | 0.763262 | 0.365356 | -1.06288 | Down | 0.000242 | 0.000436 |
| RGD1306717 | 3478  | 1244    | 639    | 12.8107  | 6.132223 | -1.06287 | Down | 6.48E-45 | 3.59E-44 |
| Prrc1      | 1730  | 2917.5  | 1501.5 | 60.48547 | 28.95494 | -1.06278 | Down | #####    | #####    |
| Pter       | 2111  | 1519    | 780    | 25.71764 | 12.31232 | -1.06266 | Down | 1.68E-54 | 9.89E-54 |
| Foxo6      | 2540  | 58      | 30     | 0.822064 | 0.393624 | -1.06243 | Down | 0.002785 | 0.00456  |
| Dock8      | 7495  | 1428.5  | 734    | 6.823158 | 3.267834 | -1.0621  | Down | 3.22E-51 | 1.86E-50 |
| 9-Mar      | 1659  | 319     | 164    | 6.88782  | 3.299359 | -1.06186 | Down | 1.19E-12 | 3.69E-12 |
| Adcy9      | 1983  | 81.5    | 42     | 1.46792  | 0.703503 | -1.06115 | Down | 0.000416 | 0.00074  |
| Kat7       | 3441  | 3047    | 1567   | 31.70233 | 15.20039 | -1.06048 | Down | #####    | #####    |
| Pkd2       | 4851  | 9120.5  | 4675.5 | 67.13089 | 32.19406 | -1.06018 | Down | 0        | 0        |
| Scaf1      | 3851  | 5871    | 3027.5 | 54.71614 | 26.2407  | -1.06016 | Down | #####    | #####    |
| Ank2       | 14261 | 546     | 280.5  | 1.371131 | 0.657727 | -1.0598  | Down | 1.04E-20 | 4.72E-20 |
| Osbp       | 4408  | 3020.5  | 1551.5 | 24.48383 | 11.74485 | -1.0598  | Down | #####    | #####    |
| Tradd      | 1333  | 430     | 221.5  | 11.54384 | 5.537981 | -1.05969 | Down | 1.50E-16 | 6.44E-16 |
| Pecr       | 1188  | 489.5   | 252.5  | 14.76405 | 7.082845 | -1.05969 | Down | 1.69E-18 | 7.45E-18 |

|              |      |        |        |          |          |          |      |          |          |
|--------------|------|--------|--------|----------|----------|----------|------|----------|----------|
| Kif2c        | 2755 | 1980   | 1017.5 | 25.69157 | 12.32629 | -1.05956 | Down | 1.90E-70 | 1.22E-69 |
| Pfkl         | 2770 | 9983.5 | 5142   | 129.1927 | 62.02787 | -1.05854 | Down | 0        | 0        |
| Anp32a       | 1017 | 3872.5 | 1989.5 | 136.2173 | 65.407   | -1.05839 | Down | #####    | #####    |
| Kif1b        | 6032 | 3526.5 | 1811.5 | 20.91484 | 10.04409 | -1.05818 | Down | #####    | #####    |
| Isoc2b       | 1065 | 251.5  | 129.5  | 8.45318  | 4.060979 | -1.05767 | Down | 2.89E-10 | 7.07E-10 |
| Asmtl        | 894  | 327.5  | 170    | 13.14796 | 6.31852  | -1.05718 | Down | 1.30E-12 | 4.01E-12 |
| Ybx2         | 1354 | 80     | 41.5   | 2.126929 | 1.022306 | -1.05694 | Down | 0.000371 | 0.000662 |
| LOC684173    | 1966 | 222.5  | 114.5  | 4.043167 | 1.943764 | -1.05663 | Down | 2.96E-09 | 7.00E-09 |
| Gja6         | 861  | 56     | 29     | 2.335357 | 1.124527 | -1.05433 | Down | 0.003353 | 0.005466 |
| Anapc1       | 8895 | 7501   | 3869   | 30.13967 | 14.51931 | -1.05369 | Down | #####    | #####    |
| Sipa1l2      | 6690 | 2291.5 | 1180.5 | 12.26625 | 5.909579 | -1.05357 | Down | 1.13E-80 | 7.57E-80 |
| LOC688293    | 1474 | 439    | 228    | 10.70942 | 5.161868 | -1.05291 | Down | 1.82E-16 | 7.83E-16 |
| Stk38l       | 2406 | 1743.5 | 898    | 25.90196 | 12.48465 | -1.05291 | Down | 9.01E-62 | 5.52E-61 |
| Kdelr3       | 1308 | 2750   | 1422   | 75.2411  | 36.2719  | -1.05267 | Down | 1.59E-95 | 1.12E-94 |
| Arf5         | 1058 | 4421.5 | 2294   | 149.8362 | 72.23501 | -1.05262 | Down | #####    | #####    |
| Ring1        | 1741 | 913.5  | 473.5  | 18.84079 | 9.08461  | -1.05236 | Down | 9.70E-33 | 4.94E-32 |
| Smarcd2      | 2593 | 2354.5 | 1219   | 32.52833 | 15.68512 | -1.0523  | Down | 9.58E-82 | 6.44E-81 |
| Ddx54        | 3128 | 3384   | 1750.5 | 38.73947 | 18.6833  | -1.05205 | Down | #####    | #####    |
| Wdr18        | 1387 | 1223.5 | 633.5  | 31.62773 | 15.25659 | -1.05176 | Down | 2.21E-43 | 1.21E-42 |
| Pwwp2b       | 2283 | 408.5  | 211    | 6.404622 | 3.090021 | -1.0515  | Down | 1.47E-15 | 6.21E-15 |
| Zfyve9       | 6457 | 948.5  | 490.5  | 5.249667 | 2.533201 | -1.05126 | Down | 4.04E-34 | 2.08E-33 |
| Mcm7         | 2357 | 5813.5 | 3006   | 88.31043 | 42.61462 | -1.05124 | Down | #####    | #####    |
| LOC100362709 | 756  | 1996   | 1032.5 | 94.48214 | 45.59356 | -1.05121 | Down | 7.30E-70 | 4.65E-69 |
| Nudt14       | 816  | 208.5  | 108    | 9.153332 | 4.418843 | -1.05063 | Down | 1.48E-08 | 3.42E-08 |
| Gstk1        | 897  | 277    | 143.5  | 11.04948 | 5.334623 | -1.05052 | Down | 4.50E-11 | 1.13E-10 |

|              |      |        |        |          |          |          |      |          |          |
|--------------|------|--------|--------|----------|----------|----------|------|----------|----------|
| Adrm1        | 1444 | 4012   | 2083   | 99.67802 | 48.13312 | -1.05025 | Down | #####    | #####    |
| Mst4         | 1882 | 804.5  | 416    | 15.24434 | 7.364087 | -1.04969 | Down | 4.07E-29 | 2.01E-28 |
| Cbl          | 3797 | 923    | 479    | 8.705977 | 4.206369 | -1.04943 | Down | 6.07E-33 | 3.09E-32 |
| Sgta         | 1260 | 2953   | 1533.5 | 84.1078  | 40.64637 | -1.04911 | Down | #####    | #####    |
| Psmc7        | 1588 | 4170   | 2162   | 93.99223 | 45.42367 | -1.0491  | Down | #####    | #####    |
| Alg6         | 3007 | 675    | 348.5  | 7.982522 | 3.858182 | -1.04892 | Down | 6.48E-25 | 3.06E-24 |
| Gpr162       | 2873 | 86.5   | 45     | 1.082448 | 0.523253 | -1.04872 | Down | 0.000323 | 0.000579 |
| Taf10        | 869  | 718.5  | 374.5  | 29.62792 | 14.32556 | -1.04837 | Down | 9.26E-26 | 4.43E-25 |
| Bcl9         | 4458 | 1326   | 689.5  | 10.6661  | 5.158245 | -1.04808 | Down | 1.92E-46 | 1.08E-45 |
| Kiaa0895l    | 2003 | 85     | 44     | 1.521086 | 0.735656 | -1.048   | Down | 0.00029  | 0.00052  |
| Ttc9         | 2109 | 634.5  | 329    | 10.75613 | 5.202731 | -1.04782 | Down | 3.86E-23 | 1.79E-22 |
| Gramd1a      | 2550 | 914    | 474.5  | 12.8463  | 6.213801 | -1.0478  | Down | 1.08E-32 | 5.49E-32 |
| Rcwb1        | 3632 | 1279.5 | 663.5  | 12.58499 | 6.087637 | -1.04775 | Down | 4.04E-45 | 2.24E-44 |
| LOC100911448 | 965  | 106    | 55     | 3.938913 | 1.905673 | -1.0475  | Down | 5.36E-05 | 0.000102 |
| Xk           | 2856 | 156.5  | 81     | 1.961313 | 0.949101 | -1.04719 | Down | 9.51E-07 | 2.02E-06 |
| Man1a2       | 3482 | 2193.5 | 1135.5 | 22.51701 | 10.89655 | -1.04714 | Down | 2.19E-76 | 1.44E-75 |
| Pi4ka        | 6579 | 1913   | 993.5  | 10.40526 | 5.035818 | -1.04701 | Down | 2.21E-66 | 1.38E-65 |
| LOC100910831 | 351  | 75.5   | 39.5   | 7.733722 | 3.743102 | -1.04693 | Down | 0.000717 | 0.001235 |
| Kif3a        | 2279 | 1534.5 | 795.5  | 24.08142 | 11.65803 | -1.0466  | Down | 8.49E-54 | 4.97E-53 |
| Spag5        | 3881 | 3101   | 1612   | 28.56185 | 13.84471 | -1.04475 | Down | #####    | #####    |
| Trim9        | 3689 | 64     | 33.5   | 0.623597 | 0.302333 | -1.04447 | Down | 0.001601 | 0.002674 |
| Nes          | 5946 | 7511.5 | 3899.5 | 45.17076 | 21.91001 | -1.0438  | Down | #####    | #####    |
| Stoml2       | 1213 | 2008   | 1045.5 | 59.33578 | 28.79173 | -1.04325 | Down | 3.82E-69 | 2.42E-68 |
| Mmp19        | 2006 | 3148   | 1645.5 | 56.28813 | 27.33367 | -1.04215 | Down | #####    | #####    |
| Abcf2        | 2573 | 3054.5 | 1592   | 42.51242 | 20.64458 | -1.04212 | Down | #####    | #####    |

|              |      |         |        |          |          |          |      |          |          |
|--------------|------|---------|--------|----------|----------|----------|------|----------|----------|
| Wrb          | 2419 | 749.5   | 389    | 11.04851 | 5.365593 | -1.04204 | Down | 5.42E-27 | 2.62E-26 |
| Ulk4         | 3895 | 282     | 147    | 2.592786 | 1.25981  | -1.0413  | Down | 5.22E-11 | 1.31E-10 |
| Tyw1         | 2557 | 1347.5  | 702.5  | 18.84746 | 9.160416 | -1.04089 | Down | 8.34E-47 | 4.68E-46 |
| S100b        | 1488 | 958     | 501    | 23.07409 | 11.21874 | -1.04036 | Down | 1.70E-33 | 8.72E-33 |
| Ankrd9       | 1481 | 279.5   | 145.5  | 6.76612  | 3.290096 | -1.0402  | Down | 5.58E-11 | 1.40E-10 |
| Zcchc2       | 4206 | 604.5   | 315    | 5.147586 | 2.503221 | -1.04011 | Down | 7.37E-22 | 3.38E-21 |
| Ephb6        | 4066 | 89      | 46.5   | 0.782548 | 0.380604 | -1.03989 | Down | 0.000202 | 0.000366 |
| Agpat3       | 6003 | 1595    | 833    | 9.512972 | 4.631537 | -1.03841 | Down | 8.24E-55 | 4.84E-54 |
| Fbxl17       | 2136 | 1241.5  | 646.5  | 20.76958 | 10.11293 | -1.03827 | Down | 2.20E-43 | 1.21E-42 |
| Rpl36        | 364  | 9409    | 4939   | 927.8166 | 451.7713 | -1.03825 | Down | 0        | 0        |
| Man1c1       | 3767 | 614.5   | 321    | 5.844752 | 2.846686 | -1.03786 | Down | 4.58E-22 | 2.11E-21 |
| ErbB2        | 4727 | 544     | 284.5  | 4.124491 | 2.009139 | -1.03764 | Down | 8.55E-20 | 3.83E-19 |
| Ddit4l       | 1107 | 66      | 34.5   | 2.120985 | 1.0336   | -1.03706 | Down | 0.001332 | 0.002243 |
| Pdia5        | 1765 | 408.5   | 213    | 8.266734 | 4.028607 | -1.03704 | Down | 3.17E-15 | 1.33E-14 |
| Mapt         | 5159 | 89      | 46.5   | 0.617867 | 0.30119  | -1.03662 | Down | 0.000202 | 0.000366 |
| Mnt          | 4568 | 1485    | 779    | 11.65942 | 5.687287 | -1.03568 | Down | 1.37E-50 | 7.86E-50 |
| Hipk1        | 7996 | 4645    | 2429.5 | 20.7752  | 10.14046 | -1.03474 | Down | #####    | #####    |
| Rab1b        | 1873 | 2666.5  | 1398   | 51.04589 | 24.92123 | -1.03442 | Down | 1.84E-89 | 1.27E-88 |
| Slc45a4      | 4620 | 727.5   | 381    | 5.632029 | 2.750016 | -1.03421 | Down | 1.11E-25 | 5.30E-25 |
| Sox13        | 3563 | 1244.5  | 652.5  | 12.52966 | 6.118368 | -1.03413 | Down | 9.36E-43 | 5.12E-42 |
| LOC100361545 | 885  | 4063.5  | 2125   | 164.2663 | 80.21489 | -1.03409 | Down | #####    | #####    |
| Mettl13      | 3135 | 990.5   | 518.5  | 11.30394 | 5.521726 | -1.03363 | Down | 1.63E-34 | 8.41E-34 |
| Mcm4         | 3339 | 10889.5 | 5703   | 116.7172 | 57.02213 | -1.03342 | Down | 0        | 0        |
| Slitrk6      | 4248 | 905     | 474    | 7.596988 | 3.71244  | -1.03306 | Down | 1.29E-31 | 6.47E-31 |
| Tbcd         | 3869 | 1015.5  | 531    | 9.381757 | 4.584724 | -1.03302 | Down | 2.34E-35 | 1.21E-34 |

|              |      |        |         |          |          |          |      |          |          |
|--------------|------|--------|---------|----------|----------|----------|------|----------|----------|
| Il17ra       | 3845 | 1290   | 677     | 12.0141  | 5.871254 | -1.03299 | Down | 3.98E-44 | 2.19E-43 |
| Trim47       | 2198 | 2719   | 1427.5  | 44.37777 | 21.69405 | -1.03254 | Down | 5.24E-91 | 3.63E-90 |
| Cby1         | 472  | 173    | 91      | 13.12397 | 6.415889 | -1.03248 | Down | 3.83E-07 | 8.32E-07 |
| Purb         | 2473 | 2944.5 | 1543.5  | 42.55358 | 20.80368 | -1.03244 | Down | 1.02E-98 | 7.17E-98 |
| LOC100909548 | 2264 | 3201.5 | 1675    | 50.53398 | 24.70809 | -1.03227 | Down | #####    | #####    |
| Sparc        | 2025 | 25701  | 13479.5 | 454.2954 | 222.153  | -1.03208 | Down | 0        | 0        |
| RGD1309437   | 1181 | 497    | 261.5   | 15.06205 | 7.369348 | -1.03131 | Down | 5.78E-18 | 2.53E-17 |
| Rab5b        | 3289 | 4236   | 2223.5  | 46.12063 | 22.56608 | -1.03126 | Down | #####    | #####    |
| Glud1        | 2998 | 12048  | 6309.5  | 143.6544 | 70.29054 | -1.0312  | Down | 0        | 0        |
| Enpep        | 3822 | 199    | 104.5   | 1.862375 | 0.911322 | -1.03111 | Down | 3.95E-08 | 8.96E-08 |
| Acat3        | 2050 | 9224.5 | 4829.5  | 160.5855 | 78.59803 | -1.03078 | Down | #####    | #####    |
| Wrnip1       | 2640 | 1322   | 694.5   | 17.90569 | 8.76545  | -1.03052 | Down | 3.81E-45 | 2.11E-44 |
| Aplp1        | 2296 | 728    | 382     | 11.36264 | 5.563398 | -1.03026 | Down | 1.23E-25 | 5.87E-25 |
| Polm         | 2896 | 608    | 319     | 7.517452 | 3.681041 | -1.03013 | Down | 1.12E-21 | 5.11E-21 |
| Raly         | 1509 | 8012.5 | 4209.5  | 190.1246 | 93.11155 | -1.02991 | Down | #####    | #####    |
| Klhdc5       | 3228 | 737    | 386.5   | 8.167353 | 4.000171 | -1.02981 | Down | 4.72E-26 | 2.27E-25 |
| Eef1a1       | 1737 | 73396  | 38492   | 1510.13  | 740.2108 | -1.02867 | Down | 0        | 0        |
| Pmpca        | 1760 | 2604.5 | 1369.5  | 52.97084 | 25.96556 | -1.0286  | Down | 7.44E-87 | 5.08E-86 |
| Edem2        | 1898 | 877    | 460     | 16.52301 | 8.101599 | -1.0282  | Down | 1.40E-30 | 6.97E-30 |
| LOC680262    | 1631 | 563    | 295     | 12.34769 | 6.054697 | -1.02811 | Down | 2.97E-20 | 1.34E-19 |
| Pkm          | 1971 | 48248  | 25381   | 876.872  | 430.0732 | -1.02778 | Down | 0        | 0        |
| Anks1b       | 5579 | 435.5  | 229.5   | 2.795264 | 1.371074 | -1.02768 | Down | 8.05E-16 | 3.42E-15 |
| Rpa1         | 2049 | 3016.5 | 1585.5  | 52.60651 | 25.807   | -1.02748 | Down | #####    | 1.52E-99 |
| Eif1ax       | 3059 | 8658.5 | 4532    | 100.865  | 49.49004 | -1.02722 | Down | #####    | #####    |
| Fam20c       | 2960 | 692    | 366     | 8.383169 | 4.113335 | -1.02719 | Down | 5.59E-24 | 2.62E-23 |

|            |      |         |        |          |          |          |      |          |          |
|------------|------|---------|--------|----------|----------|----------|------|----------|----------|
| Klh17      | 2057 | 128.5   | 67.5   | 2.232716 | 1.0958   | -1.02682 | Down | 1.12E-05 | 2.25E-05 |
| Commd5     | 1100 | 111     | 58.5   | 3.607204 | 1.771071 | -1.02626 | Down | 4.19E-05 | 8.08E-05 |
| Igsf9b     | 4242 | 268.5   | 142    | 2.273506 | 1.116343 | -1.02614 | Down | 3.75E-10 | 9.12E-10 |
| Eef1g      | 1433 | 35182   | 18524  | 878.4005 | 431.4214 | -1.02578 | Down | 0        | 0        |
| Fert2      | 3387 | 787     | 414    | 8.318112 | 4.085456 | -1.02576 | Down | 2.05E-27 | 9.96E-27 |
| Tmub1      | 1288 | 781     | 413.5  | 21.75519 | 10.69231 | -1.02479 | Down | 7.22E-27 | 3.49E-26 |
| Akr1b8     | 993  | 17895.5 | 9431   | 645.3849 | 317.2728 | -1.02444 | Down | 0        | 0        |
| Trpv4      | 3211 | 56.5    | 30     | 0.630973 | 0.310247 | -1.02416 | Down | 0.005014 | 0.008049 |
| Plcg1      | 5106 | 3877.5  | 2045   | 27.16511 | 13.3615  | -1.02367 | Down | #####    | #####    |
| Kctd10     | 2913 | 5991.5  | 3160.5 | 73.6659  | 36.23415 | -1.02365 | Down | #####    | #####    |
| Parp3      | 2123 | 1939.5  | 1023   | 32.71046 | 16.09091 | -1.02351 | Down | 1.46E-64 | 9.03E-64 |
| Fam116b    | 2294 | 360.5   | 191    | 5.637426 | 2.773924 | -1.02311 | Down | 4.16E-13 | 1.42E-12 |
| Ttc3       | 7364 | 7204    | 3790   | 34.90453 | 17.1877  | -1.02204 | Down | #####    | #####    |
| RGD1562451 | 2294 | 1210    | 636    | 18.80859 | 9.269666 | -1.0208  | Down | 2.45E-41 | 1.33E-40 |
| Amelx      | 444  | 638.5   | 339    | 51.56897 | 25.42439 | -1.02029 | Down | 5.57E-22 | 2.56E-21 |
| Cnnm4      | 4599 | 1351    | 715    | 10.5189  | 5.186295 | -1.02021 | Down | 3.65E-45 | 2.03E-44 |
| Tspan9     | 4202 | 440     | 232.5  | 3.748573 | 1.848497 | -1.01999 | Down | 6.32E-16 | 2.69E-15 |
| Gpm6b      | 2099 | 4990.5  | 2629.5 | 84.7584  | 41.81233 | -1.01943 | Down | #####    | #####    |
| Dpp3       | 2632 | 1689.5  | 893    | 22.9864  | 11.33964 | -1.01941 | Down | 3.65E-56 | 2.16E-55 |
| Rbms2      | 1309 | 2550    | 1351.5 | 69.86749 | 34.49933 | -1.01805 | Down | 2.02E-83 | 1.37E-82 |
| LOC679168  | 1161 | 326     | 172    | 10.03679 | 4.957047 | -1.01775 | Down | 3.67E-12 | 1.04E-11 |
| Hm13       | 1392 | 4096.5  | 2179   | 105.6432 | 52.17748 | -1.0177  | Down | #####    | #####    |
| RGD1560248 | 5130 | 2259.5  | 1193   | 15.71154 | 7.760539 | -1.0176  | Down | 9.99E-75 | 6.52E-74 |
| Dpp9       | 3514 | 2747.5  | 1456.5 | 27.96316 | 13.81541 | -1.01725 | Down | 1.28E-89 | 8.81E-89 |
| RGD1310427 | 6364 | 2833.5  | 1498   | 15.91087 | 7.861069 | -1.01721 | Down | 6.12E-93 | 4.25E-92 |

|            |      |         |        |          |          |          |      |          |          |
|------------|------|---------|--------|----------|----------|----------|------|----------|----------|
| Mt3        | 405  | 129.5   | 68.5   | 11.43118 | 5.652461 | -1.01602 | Down | 1.25E-05 | 2.50E-05 |
| Pdxdc1     | 2863 | 1633.5  | 863.5  | 20.4038  | 10.08933 | -1.01601 | Down | 2.00E-54 | 1.18E-53 |
| Cdk10      | 1629 | 901     | 479.5  | 19.83043 | 9.808425 | -1.01562 | Down | 2.45E-30 | 1.22E-29 |
| LOC685025  | 2374 | 1598.5  | 848.5  | 24.12567 | 11.94409 | -1.01427 | Down | 9.78E-53 | 5.68E-52 |
| Ahdc1      | 6103 | 1556    | 829    | 9.155211 | 4.532733 | -1.01421 | Down | 7.13E-51 | 4.09E-50 |
| Fbf1       | 3696 | 542.5   | 289    | 5.269418 | 2.608898 | -1.0142  | Down | 9.55E-19 | 4.23E-18 |
| Atp2c1     | 4946 | 3858    | 2044   | 27.85405 | 13.79736 | -1.01349 | Down | #####    | #####    |
| Nudt3      | 2082 | 2475.5  | 1318   | 42.59904 | 21.10207 | -1.01344 | Down | 5.97E-80 | 3.99E-79 |
| Fkbp2      | 651  | 1348    | 717.5  | 74.24291 | 36.78139 | -1.01328 | Down | 1.71E-44 | 9.44E-44 |
| Slc47a1    | 1749 | 805     | 426.5  | 16.43396 | 8.141753 | -1.01327 | Down | 1.36E-27 | 6.59E-27 |
| Gpx4       | 1025 | 4889    | 2599.5 | 170.7019 | 84.58045 | -1.01308 | Down | #####    | #####    |
| Ptdss2     | 2190 | 1284    | 683    | 21.00882 | 10.41118 | -1.01286 | Down | 1.86E-42 | 1.02E-41 |
| RGD1310769 | 1683 | 1484.5  | 789    | 31.57082 | 15.64551 | -1.01284 | Down | 7.33E-49 | 4.16E-48 |
| Rps7       | 666  | 12298.5 | 6536   | 661.2868 | 327.7384 | -1.01273 | Down | 0        | 0        |
| Pak1       | 2539 | 2080.5  | 1107.5 | 29.3538  | 14.54952 | -1.01258 | Down | 1.37E-67 | 8.66E-67 |
| Lmtk2      | 8223 | 2370.5  | 1261   | 10.32297 | 5.119442 | -1.0118  | Down | 8.26E-77 | 5.43E-76 |
| Tfap4      | 2136 | 301.5   | 161    | 5.065763 | 2.512723 | -1.01153 | Down | 5.51E-11 | 1.38E-10 |
| Tbrg1      | 1519 | 2047    | 1091.5 | 48.30708 | 23.96304 | -1.01142 | Down | 2.69E-66 | 1.68E-65 |
| Upk1b      | 1801 | 53      | 28.5   | 1.057172 | 0.524583 | -1.01097 | Down | 0.005436 | 0.008708 |
| LOC498330  | 1514 | 108     | 57.5   | 2.557493 | 1.269479 | -1.01049 | Down | 6.65E-05 | 0.000126 |
| Pank3      | 3030 | 2725    | 1445   | 32.0473  | 15.90991 | -1.01028 | Down | 8.22E-89 | 5.65E-88 |
| Xpr1       | 2410 | 1223    | 650.5  | 18.14246 | 9.009988 | -1.00977 | Down | 1.31E-40 | 7.06E-40 |
| Rcan3      | 790  | 223     | 119    | 10.12552 | 5.029153 | -1.00961 | Down | 1.53E-08 | 3.51E-08 |
| Kif7       | 4490 | 477     | 255    | 3.806962 | 1.891122 | -1.0094  | Down | 1.41E-16 | 6.08E-16 |
| Farp1      | 4564 | 5422    | 2893.5 | 42.58851 | 21.15751 | -1.00929 | Down | #####    | #####    |



|              |      |         |        |          |          |          |      |          |          |
|--------------|------|---------|--------|----------|----------|----------|------|----------|----------|
| Srprb        | 914  | 1551    | 826    | 60.72752 | 30.18119 | -1.0087  | Down | 9.07E-51 | 5.20E-50 |
| LOC100362836 | 2449 | 688     | 366.5  | 10.0388  | 4.989635 | -1.00858 | Down | 1.65E-23 | 7.67E-23 |
| Mapk14       | 3452 | 2703.5  | 1440   | 28.00796 | 13.9239  | -1.00827 | Down | 4.74E-87 | 3.24E-86 |
| Leprel1      | 2387 | 1307.5  | 697.5  | 19.61319 | 9.757206 | -1.00728 | Down | 6.61E-43 | 3.62E-42 |
| Dcxr         | 879  | 194     | 103.5  | 7.906684 | 3.933771 | -1.00716 | Down | 1.08E-07 | 2.41E-07 |
| Arhgef7      | 4379 | 3272.5  | 1748   | 26.78888 | 13.3283  | -1.00714 | Down | #####    | #####    |
| Herpud2      | 2085 | 867.5   | 462.5  | 14.88479 | 7.406163 | -1.00704 | Down | 4.39E-29 | 2.16E-28 |
| Zfp771       | 2837 | 749.5   | 402.5  | 9.489968 | 4.726133 | -1.00574 | Down | 6.85E-25 | 3.24E-24 |
| Arl2         | 893  | 583     | 312    | 23.39018 | 11.6487  | -1.00573 | Down | 7.24E-20 | 3.25E-19 |
| LOC688146    | 1679 | 165.5   | 88     | 3.524954 | 1.756307 | -1.00506 | Down | 1.13E-06 | 2.39E-06 |
| Slc38a10     | 4699 | 2830.5  | 1512.5 | 21.54855 | 10.74041 | -1.00454 | Down | 2.29E-90 | 1.58E-89 |
| Nr2c2ap      | 1544 | 2063.5  | 1101.5 | 47.7593  | 23.82858 | -1.00309 | Down | 1.44E-66 | 9.00E-66 |
| Slc35c1      | 3027 | 921     | 492.5  | 10.9083  | 5.444452 | -1.00257 | Down | 1.34E-30 | 6.70E-30 |
| Rpn1         | 2214 | 11632.5 | 6221   | 187.9464 | 93.80612 | -1.00257 | Down | 0        | 0        |
| RGD1309534   | 2502 | 598     | 320.5  | 8.542881 | 4.266156 | -1.00179 | Down | 2.42E-20 | 1.09E-19 |
| Cdk2ap1      | 1252 | 6004    | 3217.5 | 171.785  | 85.78707 | -1.00177 | Down | #####    | #####    |
| Rt1.aa       | 1617 | 2641.5  | 1418   | 58.53087 | 29.23179 | -1.00166 | Down | 2.31E-83 | 1.56E-82 |
| LOC681658    | 1601 | 615.5   | 329.5  | 13.77091 | 6.878891 | -1.00138 | Down | 6.84E-21 | 3.11E-20 |
| Postn        | 3177 | 16456.5 | 8788.5 | 184.8438 | 92.35374 | -1.00106 | Down | 0        | 0        |
| LOC100909645 | 3075 | 178     | 95.5   | 2.077695 | 1.038794 | -1.00007 | Down | 4.36E-07 | 9.47E-07 |
